# Supplementary material for: Human Kidney Tubule-Specific Gene Expression Based Dissection of Chronic Kidney Disease Traits
Source: PubMed Central journal article supplement — eBioMedicine. 2017 Sep 17;24:267–76. doi: 10.1016/j.ebiom.2017.09.014 (PMC5652292; doi:10.1016/j.ebiom.2017.09.014), 2017-09-17
Supplement: mmc1.pdf [file mmc1.pdf]

**Table S1**

| <b>probe</b> | <b>gene</b> | <b>effect</b> | <b>p.val</b> | <b>FDR</b> |
|--------------|-------------|---------------|--------------|------------|
| 1405_i_at    | CCL5        | -0.01952      | 6.52E-06     | 3.54E-04   |
| 177_at       | PLD1        | 0.007132      | 4.83E-03     | 0.038547   |
| 179_at       | PMS2P11     | -0.00355      | 0.004181     | 0.03494    |
| 200002_at    | RPL35       | -0.00854      | 0.002121     | 0.02181    |
| 200012_x     | RPL21       | -0.00459      | 1.57E-04     | 3.30E-03   |
| 200018_at    | RPS13       | -0.00605      | 4.94E-06     | 2.93E-04   |
| 200025_s     | RPL27       | -0.00461      | 5.13E-04     | 0.007777   |
| 200028_s     | STARD7      | 0.003465      | 6.97E-03     | 0.049511   |
| 200032_s     | RPL9        | -0.0064       | 2.76E-07     | 4.74E-05   |
| 200036_s     | RPL10A      | -0.00499      | 2.69E-03     | 2.59E-02   |
| 200042_at    | C22orf28    | 0.005425      | 4.89E-04     | 7.50E-03   |
| 200059_s     | RHOA        | -0.00516      | 1.15E-03     | 1.40E-02   |
| 200060_s     | RNPS1       | -0.00593      | 2.18E-03     | 0.022259   |
| 200061_s     | RPS24       | -0.00397      | 1.16E-03     | 1.41E-02   |
| 200062_s     | RPL30       | -0.007        | 3.39E-04     | 0.00575    |
| 200063_s     | NPM1        | -0.00272      | 7.99E-04     | 1.07E-02   |
| 200067_x     | SNX3        | -0.00434      | 3.76E-03     | 3.26E-02   |
| 200080_s     | H3F3A       | -0.00323      | 2.92E-03     | 2.74E-02   |
| 200088_x     | RPL12       | -0.00601      | 7.26E-05     | 0.001884   |
| 200092_s     | RPL37       | -0.00414      | 1.16E-05     | 5.12E-04   |
| 200095_x     | RPS10       | -0.00566      | 6.07E-05     | 1.65E-03   |
| 200099_s     | RPS3A       | -0.00599      | 8.71E-07     | 9.75E-05   |
| 200616_s     | MLEC        | 0.007719      | 0.000264     | 0.004781   |
| 200617_at    | MLEC        | 0.008882      | 2.06E-03     | 0.021356   |
| 200632_s     | NDRG1       | 0.006007      | 9.29E-05     | 2.25E-03   |
| 200633_at    | UBB         | 0.002901      | 1.19E-03     | 1.44E-02   |
| 200642_at    | SOD1        | 0.004606      | 0.00026      | 0.004722   |
| 200644_at    | MARCKSL     | -0.01176      | 6.01E-06     | 3.36E-04   |
| 200649_at    | NUCB1       | 0.012227      | 6.87E-04     | 9.59E-03   |
| 200653_s     | CALM1       | 0.003713      | 0.000497     | 0.007581   |
| 200657_at    | SLC25A5     | 0.004856      | 6.68E-04     | 9.42E-03   |
| 200659_s     | PHB         | 0.009807      | 2.52E-05     | 0.000869   |
| 200660_at    | S100A11     | -0.0079       | 3.81E-03     | 3.28E-02   |
| 200661_at    | CTSA        | 0.008777      | 0.003477     | 0.030845   |
| 200666_s     | DNAJB1      | 0.006355      | 0.006971     | 0.049507   |
| 200668_s     | UBE2D3      | -0.00404      | 3.46E-03     | 3.07E-02   |
| 200670_at    | XBP1        | -0.00618      | 3.00E-03     | 0.02784    |
| 200684_s     | UBE2L3      | 0.007127      | 4.88E-04     | 0.007482   |
| 200686_s     | SRSF11      | -0.00505      | 3.90E-03     | 3.33E-02   |
| 200691_s     | HSPA9       | 0.006279      | 7.14E-04     | 0.009868   |
| 200692_s     | HSPA9       | 0.004043      | 0.002957     | 0.027551   |
| 200708_at    | GOT2        | 0.004223      | 5.27E-03     | 0.040899   |
| 200710_at    | ACADVL      | 0.008392      | 3.32E-03     | 0.029932   |
| 200715_x     | RPL13A      | -0.00451      | 1.53E-03     | 0.017422   |
| 200737_at    | PGK1        | 0.007062      | 2.94E-03     | 2.75E-02   |
| 200741_s     | RPS27       | -0.00764      | 1.27E-04     | 0.002832   |
| 200742_s     | TPP1        | 0.007398      | 8.38E-05     | 0.002089   |
| 200743_s     | TPP1        | 0.006706      | 0.001651     | 0.018358   |
| 200758_s     | NFE2L1      | 0.010713      | 5.89E-06     | 0.000332   |
| 200759_x     | NFE2L1      | 0.008091      | 3.05E-06     | 0.000211   |
| 200767_s     | FAM120A     | 0.008385      | 3.52E-03     | 0.031069   |

|                   |          |          |          |
|-------------------|----------|----------|----------|
| 200768_s_MAT2A    | 0.007425 | 2.79E-06 | 0.000201 |
| 200769_s_MAT2A    | 0.009607 | 2.99E-05 | 0.000975 |
| 200781_s_RPS15A   | -0.00518 | 2.86E-03 | 0.027103 |
| 200789_at_ECH1    | 0.008475 | 5.04E-04 | 0.007653 |
| 200790_at_ODC1    | 0.007456 | 1.47E-04 | 3.14E-03 |
| 200791_s_IQGAP1   | -0.007   | 0.000246 | 0.004549 |
| 200793_s_ACO2     | 0.014952 | 9.67E-06 | 0.00045  |
| 200804_at_TMBIM6  | 0.009184 | 2.13E-04 | 0.004109 |
| 200806_s_HSPD1    | 0.007284 | 8.15E-04 | 0.010887 |
| 200807_s_HSPD1    | 0.00604  | 1.49E-05 | 0.000603 |
| 200809_x_RPL12    | -0.00564 | 2.08E-04 | 0.004021 |
| 200815_s_PAFAH1B  | 0.004121 | 1.06E-03 | 1.32E-02 |
| 200817_x_RPS10    | -0.007   | 9E-05    | 0.002209 |
| 200827_at_PLOD1   | 0.008161 | 0.000239 | 0.004439 |
| 200831_s_SCD      | 0.007708 | 5.99E-03 | 0.044752 |
| 200832_s_SCD      | 0.01423  | 1.36E-03 | 0.015951 |
| 200833_s_RAP1B    | -0.00404 | 1.31E-03 | 0.015463 |
| 200838_at_CTSB    | 0.010246 | 1.63E-04 | 0.003383 |
| 200839_s_CTSB     | 0.008132 | 1.30E-05 | 5.52E-04 |
| 200849_s_AHCYL1   | 0.006853 | 0.001127 | 0.013831 |
| 200858_s_RPS8     | -0.00595 | 5.90E-05 | 0.00162  |
| 200869_at_RPL18A  | -0.01313 | 0.00304  | 0.028096 |
| 200872_at_S100A10 | -0.00721 | 6.44E-04 | 9.13E-03 |
| 200887_s_STAT1    | -0.00761 | 2.12E-03 | 0.021818 |
| 200895_s_FKBP4    | 0.006794 | 0.001803 | 0.019536 |
| 200896_x_HDGF     | 0.002561 | 2.42E-03 | 0.023937 |
| 200897_s_PALLD    | -0.00582 | 2.03E-03 | 0.021215 |
| 200902_at_SEP15   | -0.00359 | 3.09E-03 | 0.028383 |
| 200903_s_AHCY     | 0.012725 | 9.33E-06 | 0.000441 |
| 200908_s_RPLP2    | -0.0051  | 0.000477 | 0.007382 |
| 200917_s_SRPR     | 0.00687  | 7.38E-04 | 1.01E-02 |
| 200924_s_SLC3A2   | 0.010034 | 3.72E-05 | 0.001149 |
| 200933_x_RPS4X    | -0.00343 | 8.25E-04 | 0.011007 |
| 200934_at_DEK     | -0.00766 | 1.25E-06 | 0.000122 |
| 200938_s_RERE     | 0.010713 | 1.02E-03 | 1.28E-02 |
| 200939_s_RERE     | 0.00634  | 6.78E-04 | 0.009496 |
| 200944_s_HMG1     | -0.00325 | 0.004431 | 0.036262 |
| 200946_x_GLUD1    | 0.008215 | 1.30E-05 | 5.52E-04 |
| 200947_s_GLUD1    | 0.00599  | 0.004865 | 0.038774 |
| 200951_s_CCND2    | -0.00763 | 0.001036 | 0.013001 |
| 200952_s_CCND2    | -0.01002 | 3.77E-03 | 0.032664 |
| 200953_s_CCND2    | -0.01534 | 1.45E-05 | 0.000596 |
| 200954_at_ATP6V0C | 0.006001 | 2.89E-06 | 2.06E-04 |
| 200958_s_SDCBP    | -0.00565 | 0.000132 | 0.002915 |
| 200961_at_SEPHS2  | 0.005331 | 0.001884 | 0.020118 |
| 200963_x_RPL31    | -0.00477 | 6.94E-06 | 0.000369 |
| 200971_s_SERP1    | -0.00408 | 0.000864 | 0.01137  |
| 200975_at_PPT1    | -0.00486 | 0.000144 | 0.003119 |
| 200978_at_MDH1    | 0.005438 | 3.56E-03 | 0.031304 |
| 200980_s_PDHA1    | 0.00315  | 0.005467 | 0.041821 |
| 201000_at_AARS    | 0.006223 | 0.001691 | 0.018635 |
| 201007_at_HADHB   | 0.005514 | 0.000103 | 0.00243  |
| 201012_at_ANXA1   | -0.0135  | 0.000461 | 0.00721  |

|                    |          |          |          |
|--------------------|----------|----------|----------|
| 201013_s_PAICS     | 0.006473 | 7.31E-04 | 0.010055 |
| 201016_at EIF1AX   | -0.00643 | 0.000569 | 0.008388 |
| 201030_x_LDHB      | 0.003648 | 8.17E-04 | 1.09E-02 |
| 201034_at ADD3     | 0.005226 | 3.83E-03 | 3.30E-02 |
| 201035_s_HADH      | 0.013619 | 8.94E-06 | 0.000437 |
| 201036_s_HADH      | 0.011727 | 1.6E-05  | 0.000624 |
| 201049_s_RPS18     | -0.00646 | 0.000781 | 0.010611 |
| 201056_at GOLGB1   | 0.004671 | 0.000364 | 0.006056 |
| 201060_x_STOM      | 0.005392 | 0.000643 | 0.009124 |
| 201061_s_STOM      | 0.007296 | 1.6E-05  | 0.000624 |
| 201063_at RCN1     | -0.00739 | 8.20E-04 | 0.01094  |
| 201067_at PSMC2    | 0.007489 | 2.19E-03 | 0.022367 |
| 201069_at MMP2     | -0.00596 | 0.006024 | 0.044923 |
| 201089_at ATP6V1B2 | 0.009569 | 0.000353 | 0.00592  |
| 201091_s_CBX3      | -0.00317 | 9.09E-04 | 0.011767 |
| 201093_x_SDHA      | 0.006577 | 0.000685 | 0.009583 |
| 201094_at RPS29    | -0.00551 | 0.002372 | 0.023612 |
| 201097_s_ARF4      | -0.00403 | 2.21E-03 | 0.022426 |
| 201103_x_NBPF10    | -0.00501 | 2.64E-03 | 0.025584 |
| 201105_at LGALS1   | -0.01222 | 0.004091 | 0.034355 |
| 201110_s_THBS1     | -0.00995 | 0.002795 | 0.026619 |
| 201115_at POLD2    | 0.007045 | 4.73E-04 | 0.007331 |
| 201120_s_PGRMC1    | 0.007774 | 0.000708 | 0.009802 |
| 201121_s_PGRMC1    | 0.006175 | 1.36E-04 | 0.002974 |
| 201127_s_ACLY      | 0.008163 | 1.86E-06 | 0.000157 |
| 201135_at ECHS1    | 0.012809 | 7.39E-07 | 8.95E-05 |
| 201136_at PLP2     | -0.0135  | 1.54E-04 | 0.003268 |
| 201137_s_HLA-DPB1  | -0.01492 | 2.49E-04 | 0.004584 |
| 201146_at NFE2L2   | -0.00425 | 0.006721 | 0.048315 |
| 201153_s_MBNL1     | -0.00818 | 1.32E-03 | 0.015572 |
| 201155_s_MFN2      | 0.008419 | 0.001404 | 0.016302 |
| 201156_s_RAB5C     | 0.006593 | 0.006336 | 0.04658  |
| 201157_s_NMT1      | 0.007259 | 1.15E-03 | 0.014066 |
| 201158_at NMT1     | 0.006059 | 1.21E-03 | 0.014584 |
| 201163_s_IGFBP7    | -0.00743 | 9.23E-06 | 0.00044  |
| 201164_s_PUM1      | 0.006153 | 2.44E-03 | 2.41E-02 |
| 201178_at FBXO7    | 0.004726 | 0.000714 | 0.00986  |
| 201186_at LRPAP1   | 0.00587  | 1.16E-04 | 0.002641 |
| 201188_s_ITPR3     | -0.00846 | 0.001409 | 0.016317 |
| 201193_at IDH1     | 0.01029  | 7.00E-05 | 0.001833 |
| 201206_s_RRBP1     | 0.00591  | 0.005568 | 0.042367 |
| 201212_at LGMN     | 0.009401 | 0.000794 | 0.010706 |
| 201215_at PLS3     | -0.0061  | 7.49E-04 | 0.010224 |
| 201229_s_ARIH2     | 0.007144 | 0.004665 | 0.037628 |
| 201255_x_BAT3      | 0.00785  | 4.33E-03 | 0.03581  |
| 201257_x_RPS3A     | -0.00514 | 6.96E-06 | 0.000369 |
| 201268_at NME1-NMI | -0.00405 | 6.59E-03 | 0.047766 |
| 201278_at DAB2     | 0.004871 | 2.79E-03 | 2.66E-02 |
| 201279_s_DAB2      | 0.008733 | 2.25E-05 | 0.000795 |
| 201280_s_DAB2      | 0.007661 | 0.001638 | 0.018254 |
| 201282_at OGDH     | 0.012275 | 4.65E-04 | 7.24E-03 |
| 201284_s_APEH      | 0.007    | 0.003205 | 0.029158 |
| 201286_at SDC1     | 0.00828  | 2.95E-03 | 0.027535 |

|                    |          |          |          |
|--------------------|----------|----------|----------|
| 201288_at ARHGDIB  | -0.01231 | 5.66E-06 | 0.000325 |
| 201291_s_TOP2A     | -0.01217 | 1.13E-04 | 0.002589 |
| 201292_at TOP2A    | -0.00685 | 0.004272 | 0.035461 |
| 201310_s_C5orf13   | 0.007541 | 0.001228 | 0.014773 |
| 201312_s_SH3BGR1   | -0.00726 | 5.02E-05 | 0.001463 |
| 201315_x_IFITM2    | -0.01267 | 0.006194 | 0.045739 |
| 201319_at MYL12A   | -0.00421 | 0.000166 | 0.003414 |
| 201339_s_SCP2      | 0.006029 | 0.00056  | 0.008285 |
| 201347_x_GRHPR     | 0.012636 | 1.11E-06 | 0.000114 |
| 201348_at GPX3     | 0.007383 | 7.62E-05 | 0.001951 |
| 201349_at SLC9A3R1 | 0.009936 | 5.13E-05 | 0.001472 |
| 201357_s_SF3A1     | 0.006401 | 5.10E-03 | 0.040007 |
| 201391_at TRAP1    | 0.006331 | 0.000262 | 0.004746 |
| 201392_s_IGF2R     | 0.008092 | 0.006979 | 0.049528 |
| 201393_s_IGF2R     | 0.005768 | 0.002902 | 0.027299 |
| 201397_at PHGDH    | 0.006929 | 2.54E-03 | 0.024831 |
| 201398_s_TRAM1     | -0.00559 | 0.000754 | 0.010284 |
| 201406_at RPL36A   | -0.00499 | 0.004036 | 0.0341   |
| 201415_at GSS      | 0.005843 | 0.001471 | 0.016921 |
| 201419_at BAP1     | 0.006949 | 0.006066 | 0.045121 |
| 201425_at ALDH2    | 0.007917 | 5.34E-05 | 0.001523 |
| 201426_s_VIM       | -0.00944 | 0.000807 | 0.010802 |
| 201432_at CAT      | 0.007935 | 0.000134 | 0.002939 |
| 201435_s EIF4E     | -0.00441 | 0.004914 | 0.039023 |
| 201438_at COL6A3   | -0.01175 | 0.000895 | 0.011593 |
| 201491_at AHSA1    | 0.006474 | 3.35E-03 | 0.030097 |
| 201506_at TGFBI    | -0.01448 | 1.00E-04 | 2.38E-03 |
| 201508_at IGFBP4   | 0.011824 | 7.52E-05 | 0.001932 |
| 201536_at DUSP3    | 0.007688 | 0.000109 | 0.002525 |
| 201553_s_LAMP1     | 0.005033 | 0.001679 | 0.01853  |
| 201556_s_VAMP2     | 0.004777 | 7.58E-04 | 0.010333 |
| 201559_s_CLIC4     | 0.00694  | 0.0012   | 0.014531 |
| 201562_s_SORD      | 0.014638 | 4.58E-06 | 0.000282 |
| 201563_at SORD     | 0.011382 | 4.98E-05 | 0.001453 |
| 201567_s_GOLGA4    | 0.004219 | 0.004076 | 0.034305 |
| 201569_s_SAMM50    | 0.006739 | 0.000842 | 0.011155 |
| 201570_at SAMM50   | 0.008462 | 0.00091  | 0.011768 |
| 201578_at PODXL    | 0.007728 | 0.005254 | 0.040823 |
| 201590_x_ANXA2     | -0.00896 | 0.002865 | 0.027103 |
| 201601_x_IFITM1    | -0.0113  | 0.002641 | 0.02556  |
| 201611_s_ICMT      | 0.009847 | 0.002656 | 0.025659 |
| 201612_at ALDH9A1  | 0.005885 | 0.001321 | 0.0156   |
| 201625_s_INSIG1    | 0.006632 | 5.40E-03 | 0.041551 |
| 201640_x_CLPTM1    | 0.004462 | 0.00148  | 0.016999 |
| 201649_at UBE2L6   | -0.0061  | 0.000889 | 0.011565 |
| 201651_s_PACSIN2   | 0.004318 | 0.0017   | 0.018714 |
| 201666_at TIMP1    | -0.01287 | 0.00291  | 0.027322 |
| 201667_at GJA1     | -0.00899 | 0.006707 | 0.048238 |
| 201668_x_MARCKS    | -0.00897 | 1.12E-05 | 0.000501 |
| 201669_s_MARCKS    | -0.01029 | 0.000676 | 0.009487 |
| 201670_s_MARCKS    | -0.0112  | 1.27E-05 | 0.000544 |
| 201675_at AKAP1    | 0.006355 | 5.33E-04 | 0.00799  |
| 201695_s_PNP       | 0.01132  | 3.45E-04 | 0.005831 |

|                   |          |          |          |
|-------------------|----------|----------|----------|
| 201702_s_PPP1R10  | 0.00502  | 0.005771 | 0.043494 |
| 201707_at_PEX19   | 0.006998 | 4.07E-03 | 0.034265 |
| 201708_s_NIPSNAP1 | 0.010222 | 0.004088 | 0.034355 |
| 201713_s_RANBP2   | 0.005262 | 0.003774 | 0.032673 |
| 201714_at_TUBG1   | 0.010252 | 0.000111 | 0.002557 |
| 201719_s_EPB41L2  | -0.00893 | 7.82E-05 | 0.001988 |
| 201720_s_LAPTM5   | -0.01368 | 2.04E-04 | 0.003966 |
| 201721_s_LAPTM5   | -0.01515 | 0.000189 | 0.003754 |
| 201728_s_KIAA0100 | 0.011057 | 4.01E-05 | 0.001218 |
| 201729_s_KIAA0100 | 0.010147 | 1.31E-04 | 0.002901 |
| 201736_s_MARCH6   | 0.004336 | 0.005067 | 0.039871 |
| 201737_s_MARCH6   | 0.007398 | 0.000576 | 0.00844  |
| 201739_at_SGK1    | 0.007292 | 0.000116 | 0.002641 |
| 201743_at_CD14    | -0.00695 | 0.00363  | 0.031736 |
| 201744_s_LUM      | -0.0202  | 6.76E-05 | 1.78E-03 |
| 201752_s_ADD3     | 0.00549  | 1.84E-03 | 0.01983  |
| 201761_at_MTHFD2  | -0.00941 | 0.003499 | 0.030956 |
| 201787_at_FBLN1   | -0.0066  | 0.001784 | 0.019418 |
| 201796_s_VARS     | 0.007697 | 0.00066  | 0.009315 |
| 201798_s_MYOF     | -0.00947 | 0.002599 | 0.02526  |
| 201800_s_OSBP     | 0.009051 | 0.000541 | 0.008087 |
| 201816_s_GBAS     | -0.00543 | 3.14E-03 | 0.028761 |
| 201830_s_NET1     | 0.00664  | 0.002115 | 0.021785 |
| 201838_s_SUPT7L   | 0.008046 | 0.000427 | 0.006793 |
| 201848_s_BNIP3    | 0.007093 | 0.000557 | 0.008257 |
| 201852_x_COL3A1   | -0.0119  | 0.004292 | 0.035583 |
| 201858_s_SRGN     | -0.01098 | 5.70E-03 | 0.043062 |
| 201859_at_SRGN    | -0.01253 | 0.000225 | 0.00425  |
| 201867_s_TBL1X    | 0.005974 | 0.007083 | 0.049995 |
| 201889_at_FAM3C   | -0.00605 | 0.003718 | 0.032341 |
| 201890_at_RRM2    | -0.00686 | 0.005633 | 0.042731 |
| 201891_s_B2M      | -0.00581 | 7.67E-06 | 0.000393 |
| 201900_s_AKR1A1   | 0.011153 | 6.42E-05 | 0.00172  |
| 201903_at_UQCRC1  | 0.008658 | 0.000525 | 0.007909 |
| 201910_at_FARP1   | 0.006088 | 0.000842 | 0.011155 |
| 201924_at_AFF1    | 0.0042   | 0.00598  | 0.044721 |
| 201925_s_CD55     | -0.00807 | 0.000618 | 0.008834 |
| 201928_at_PKP4    | 0.005436 | 0.003744 | 0.032505 |
| 201931_at_ETFA    | 0.007371 | 0.000146 | 0.003136 |
| 201938_at_CDK2AP1 | -0.00607 | 0.000142 | 0.003084 |
| 201951_at_ALCAM   | 0.007275 | 0.001216 | 0.014674 |
| 201963_at_ACSL1   | 0.010912 | 1.55E-05 | 0.000614 |
| 201968_s_PGM1     | 0.008392 | 3.56E-06 | 0.000238 |
| 201971_s_ATP6V1A  | 0.009887 | 0.000614 | 0.008812 |
| 201981_at_PAPPA   | 0.010299 | 0.000395 | 0.006428 |
| 201982_s_PAPPA    | 0.005818 | 0.003554 | 0.031284 |
| 201984_s_EGFR     | 0.006724 | 0.000467 | 0.007262 |
| 201994_at_MORF4L2 | -0.00443 | 0.000127 | 0.002832 |
| 202002_at_ACAA2   | 0.005115 | 0.004922 | 0.039054 |
| 202003_s_ACAA2    | 0.010592 | 2.39E-07 | 4.29E-05 |
| 202016_at_MEST    | -0.00681 | 0.002647 | 0.025589 |
| 202017_at_EPHX1   | 0.013913 | 3.21E-07 | 5.25E-05 |
| 202018_s_LTF      | -0.02507 | 0.000231 | 0.004346 |

|                    |          |          |          |
|--------------------|----------|----------|----------|
| 202025_x_ACAA1     | 0.013789 | 1.97E-07 | 3.78E-05 |
| 202028_s_RPL38     | -0.00372 | 2.04E-03 | 0.021275 |
| 202032_s_MAN2A2    | 0.003818 | 0.001416 | 0.016374 |
| 202045_s_GRLF1     | 0.006793 | 0.000226 | 0.004263 |
| 202053_s_ALDH3A2   | 0.010966 | 3.28E-06 | 0.000222 |
| 202054_s_ALDH3A2   | 0.008763 | 0.000588 | 0.008539 |
| 202065_s_PPFIA1    | 0.007228 | 0.00215  | 0.022037 |
| 202074_s_OPTN      | 0.004325 | 3.18E-03 | 0.028941 |
| 202087_s_CTSL1     | 0.006217 | 0.00018  | 0.003628 |
| 202088_at_SLC39A6  | -0.00644 | 0.000627 | 0.008929 |
| 202104_s_SPG7      | 0.007445 | 0.004709 | 0.037841 |
| 202108_at_PEPD     | 0.018474 | 1.56E-07 | 3.38E-05 |
| 202111_at_SLC4A2   | 0.005039 | 0.000557 | 0.008257 |
| 202122_s_PLIN3     | -0.00466 | 0.006807 | 0.048714 |
| 202130_at_RIOK3    | 0.006049 | 0.004406 | 0.036135 |
| 202134_s_WWTR1     | 0.00688  | 0.004816 | 0.038478 |
| 202139_at_AKR7A2   | 0.009551 | 0.003295 | 0.029777 |
| 202148_s_PYCR1     | -0.00611 | 0.00125  | 0.014959 |
| 202173_s_VEZF1     | -0.00376 | 0.005853 | 0.043989 |
| 202178_at_PRKCZ    | 0.010254 | 7.92E-06 | 0.000397 |
| 202181_at_KIAA0247 | 0.006103 | 0.002668 | 0.025738 |
| 202185_at_PLOD3    | 0.006158 | 0.001495 | 0.017111 |
| 202189_x_PTBP1     | 0.002536 | 0.006266 | 0.046147 |
| 202204_s_AMFR      | 0.005283 | 0.003504 | 0.030974 |
| 202210_x_GSK3A     | 0.00435  | 0.004266 | 0.035421 |
| 202211_at_ARFGAP3  | -0.00443 | 0.003316 | 0.029932 |
| 202217_at_C21orf33 | 0.010877 | 3.45E-05 | 0.001083 |
| 202235_at_SLC16A1  | 0.011362 | 0.000197 | 0.003868 |
| 202236_s_SLC16A1   | 0.011511 | 0.001142 | 0.013982 |
| 202237_at_NNMT     | -0.02512 | 2.26E-06 | 0.000175 |
| 202238_s_NNMT      | -0.02062 | 6.09E-06 | 0.000338 |
| 202242_at_TSPAN7   | 0.008639 | 0.000354 | 0.005924 |
| 202250_s_DCAF8     | 0.007307 | 0.001085 | 0.013471 |
| 202255_s_SIPA1L1   | 0.008206 | 1.39E-04 | 3.03E-03 |
| 202256_at_CD2BP2   | 0.006294 | 8.12E-04 | 0.010856 |
| 202265_at_BMI1     | -0.00791 | 4.83E-04 | 0.007433 |
| 202267_at_LAMC2    | -0.00655 | 0.002199 | 0.022384 |
| 202272_s_FBXO28    | 0.008088 | 0.000366 | 0.006065 |
| 202280_at          | 0.005881 | 0.002478 | 0.024404 |
| 202295_s_CTSH      | 0.010017 | 8.21E-06 | 0.000408 |
| 202299_s_HBXIP     | 0.006666 | 0.000556 | 0.008257 |
| 202300_at_HBXIP    | 0.008321 | 0.000459 | 0.007198 |
| 202307_s_TAP1      | -0.00758 | 0.000521 | 0.007858 |
| 202309_at_MTHFD1   | 0.008496 | 1.53E-05 | 0.000612 |
| 202310_s_COL1A1    | -0.01132 | 0.005886 | 0.044131 |
| 202311_s_COL1A1    | -0.00755 | 0.000463 | 0.007221 |
| 202315_s_BCR       | 0.007232 | 0.003781 | 0.032699 |
| 202316_x_UBE4B     | 0.008677 | 5.43E-03 | 0.041721 |
| 202317_s_UBE4B     | 0.005548 | 0.001756 | 0.01918  |
| 202331_at_BCKDHA   | 0.004502 | 0.004849 | 0.038673 |
| 202340_x_NR4A1     | 0.006508 | 6.71E-03 | 0.048238 |
| 202350_s_MATN2     | -0.00904 | 0.001267 | 0.015134 |
| 202365_at_UNC119B  | 0.006241 | 0.001342 | 0.015782 |

|                    |          |          |          |
|--------------------|----------|----------|----------|
| 202367_at CUX1     | 0.007563 | 0.000693 | 0.009656 |
| 202376_at SERPINA3 | -0.0131  | 4.10E-03 | 0.034395 |
| 202382_s_GNPDA1    | 0.007252 | 0.003352 | 0.030105 |
| 202388_at RGS2     | -0.01055 | 0.000396 | 0.006428 |
| 202391_at BASP1    | -0.01812 | 2.12E-05 | 0.000766 |
| 202403_s_COL1A2    | -0.01175 | 0.003778 | 0.032688 |
| 202404_s_COL1A2    | -0.01961 | 3.22E-05 | 0.00103  |
| 202416_at DNAJC7   | 0.005675 | 0.000933 | 0.012002 |
| 202422_s_ACSL4     | -0.01368 | 1.35E-06 | 0.000129 |
| 202430_s_PLSCR1    | -0.01149 | 1.63E-05 | 0.000629 |
| 202433_at SLC35B1  | 0.004753 | 2.06E-03 | 0.021356 |
| 202435_s_CYP1B1    | -0.01145 | 0.000329 | 0.005628 |
| 202436_s_CYP1B1    | -0.01177 | 2.27E-03 | 0.022923 |
| 202437_s_CYP1B1    | -0.01443 | 6.46E-06 | 0.000353 |
| 202441_at ERLIN1   | 0.004773 | 0.005021 | 0.039608 |
| 202446_s_PLSCR1    | -0.01042 | 5.54E-06 | 0.000321 |
| 202447_at DECR1    | 0.006222 | 0.000101 | 0.002391 |
| 202449_s_RXRA      | 0.009158 | 1.61E-06 | 0.000144 |
| 202450_s_CTSK      | -0.01106 | 0.000575 | 0.008435 |
| 202454_s_ERBB3     | 0.008202 | 0.000101 | 0.002397 |
| 202456_s_ZER1      | 0.006628 | 0.002984 | 0.027709 |
| 202471_s_IDH3G     | 0.00923  | 4.75E-04 | 0.007355 |
| 202486_at AFG3L2   | 0.005832 | 0.000527 | 0.007929 |
| 202488_s_FXYD3     | -0.00622 | 0.004405 | 0.036135 |
| 202489_s_FXYD3     | -0.01113 | 7.43E-04 | 0.010162 |
| 202503_s_KIAA0101  | -0.01244 | 1.72E-07 | 3.51E-05 |
| 202504_at TRIM29   | -0.0095  | 9.52E-04 | 0.012173 |
| 202524_s_SPOCK2    | 0.008236 | 0.003504 | 0.030974 |
| 202532_s_DHFR      | 0.012135 | 4.91E-05 | 0.001437 |
| 202549_at VAPB     | 0.007867 | 0.005741 | 0.043337 |
| 202590_s_PDK2      | 0.015288 | 4.6E-07  | 6.53E-05 |
| 202598_at S100A13  | -0.01111 | 7.68E-05 | 0.001963 |
| 202616_s_MECP2     | 0.004817 | 5.37E-03 | 0.04145  |
| 202622_s_ATXN2     | 0.003641 | 0.004149 | 0.034747 |
| 202625_at LYN      | -0.01217 | 3.8E-05  | 0.001171 |
| 202626_s_LYN       | -0.0071  | 0.003057 | 0.028188 |
| 202661_at ITPR2    | 0.007612 | 0.00166  | 0.018411 |
| 202662_s_ITPR2     | 0.005535 | 0.003671 | 0.032021 |
| 202663_at WIPF1    | -0.00506 | 0.003611 | 0.031606 |
| 202664_at WIPF1    | -0.00785 | 0.004415 | 0.036169 |
| 202675_at SDHB     | 0.00749  | 0.002536 | 0.024815 |
| 202685_s_AXL       | -0.00637 | 0.001144 | 0.013998 |
| 202709_at FMOD     | -0.00677 | 0.001951 | 0.020654 |
| 202729_s_LTBP1     | -0.01159 | 4.58E-04 | 0.007189 |
| 202733_at P4HA2    | 0.016502 | 6.02E-09 | 6.19E-06 |
| 202735_at EBP      | 0.006094 | 0.000715 | 0.009868 |
| 202740_at ABHD14A  | 0.019929 | 5.24E-07 | 7.25E-05 |
| 202741_at PRKACB   | -0.00684 | 0.000938 | 0.012053 |
| 202746_at ITM2A    | -0.01205 | 8.66E-06 | 0.000426 |
| 202748_at GBP2     | -0.01233 | 0.00016  | 0.003355 |
| 202751_at TFIP11   | 0.004495 | 0.002355 | 0.023534 |
| 202752_x_SLC7A8    | 0.020584 | 1.42E-05 | 0.000587 |
| 202767_at ACP2     | 0.005988 | 0.00256  | 0.025008 |

|                    |          |          |          |
|--------------------|----------|----------|----------|
| 202772_at HMGCL    | 0.008535 | 0.000367 | 0.00607  |
| 202783_at NNT      | 0.009813 | 6.29E-05 | 0.001699 |
| 202784_s_NNT       | 0.007354 | 3.85E-05 | 0.001182 |
| 202786_at STK39    | -0.00642 | 0.002864 | 0.027103 |
| 202792_s_PPP6R2    | 0.007283 | 0.004686 | 0.037737 |
| 202795_x_TRIOBP    | -0.00488 | 0.002688 | 0.025886 |
| 202800_at SLC1A3   | -0.00843 | 0.005321 | 0.041157 |
| 202807_s_TOM1      | 0.005437 | 4.59E-03 | 0.037169 |
| 202814_s_HEXIM1    | 0.007782 | 0.000386 | 0.006312 |
| 202815_s_HEXIM1    | 0.006043 | 1.48E-03 | 0.016987 |
| 202820_at AHR      | -0.01028 | 0.000561 | 0.008288 |
| 202825_at SLC25A4  | 0.005414 | 0.004088 | 0.034355 |
| 202830_s_SLC37A4   | 0.013723 | 6.22E-07 | 8.02E-05 |
| 202833_s_SERPINA1  | 0.01499  | 8.64E-07 | 9.75E-05 |
| 202834_at AGT      | 0.017008 | 7.08E-07 | 8.67E-05 |
| 202847_at PCK2     | 0.017703 | 1.05E-07 | 2.73E-05 |
| 202853_s_RYK       | -0.00613 | 0.000158 | 0.003303 |
| 202861_at PER1     | 0.007991 | 0.000844 | 0.011167 |
| 202862_at FAH      | 0.016382 | 7.52E-06 | 0.000389 |
| 202863_at SP100    | -0.00696 | 9.61E-04 | 0.012271 |
| 202864_s_SP100     | -0.00569 | 0.004296 | 0.035601 |
| 202866_at DNAJB12  | 0.005694 | 0.001543 | 0.017477 |
| 202867_s_DNAJB12   | 0.008347 | 0.000731 | 0.010055 |
| 202872_at ATP6V1C1 | 0.007752 | 0.001365 | 0.015967 |
| 202873_at ATP6V1C1 | 0.007305 | 0.000311 | 0.005385 |
| 202876_s_PBX2      | 0.004874 | 0.002023 | 0.021165 |
| 202888_s_ANPEP     | 0.015684 | 7.69E-06 | 0.000393 |
| 202889_x_MAP7      | 0.012698 | 4.03E-07 | 6.07E-05 |
| 202891_at NIT1     | 0.007325 | 0.000167 | 0.003427 |
| 202895_s_SIRPA     | 0.008065 | 0.001668 | 0.01848  |
| 202898_at SDC3     | -0.00932 | 2.03E-05 | 0.000742 |
| 202901_x_CTSS      | -0.01293 | 1.7E-06  | 0.00015  |
| 202902_s_CTSS      | -0.01616 | 1E-05    | 0.000463 |
| 202910_s_CD97      | -0.00413 | 0.00604  | 0.045014 |
| 202920_at ANK2     | 0.018113 | 2.67E-05 | 0.000909 |
| 202921_s_ANK2      | 0.018747 | 1.81E-05 | 0.00068  |
| 202923_s_GCLC      | 0.006524 | 0.003851 | 0.03309  |
| 202924_s_PLAGL2    | 0.006732 | 0.001374 | 0.016014 |
| 202925_s_PLAGL2    | 0.005246 | 0.00193  | 0.02048  |
| 202931_x_BIN1      | 0.010121 | 6.11E-05 | 0.001661 |
| 202941_at NDUFV2   | 0.005494 | 0.005371 | 0.04145  |
| 202942_at ETFB     | 0.009906 | 0.000291 | 0.005129 |
| 202947_s_GYPC      | -0.00905 | 0.001578 | 0.017735 |
| 202949_s_FHL2      | -0.01115 | 0.000707 | 0.0098   |
| 202953_at C1QB     | -0.01151 | 0.002419 | 0.02395  |
| 202957_at HCLS1    | -0.016   | 1.53E-05 | 0.000613 |
| 202962_at KIF13B   | 0.009734 | 2.26E-06 | 0.000175 |
| 202965_s_CAPN6     | -0.01432 | 7.91E-05 | 0.001998 |
| 202966_at CAPN6    | -0.01156 | 0.000223 | 0.004232 |
| 202970_at DYRK2    | -0.00531 | 0.003842 | 0.033042 |
| 202972_s_FAM13A    | 0.005174 | 0.000968 | 0.012323 |
| 202974_at MPP1     | 0.010237 | 0.000529 | 0.00795  |
| 202982_s_ACOT1     | 0.015124 | 5.08E-05 | 0.001469 |



|                   |          |          |          |
|-------------------|----------|----------|----------|
| 202988_s_RGS1     | -0.0158  | 0.000498 | 0.007598 |
| 202992_at C7      | -0.01263 | 0.000542 | 0.008091 |
| 203015_s_S SX2IP  | 0.00724  | 0.003818 | 0.032911 |
| 203017_s_S SX2IP  | 0.00675  | 0.004978 | 0.039307 |
| 203021_at SLPI    | -0.0189  | 1.55E-03 | 0.017479 |
| 203030_s_PTPRN2   | -0.00911 | 0.004904 | 0.038995 |
| 203032_s_FH       | 0.008186 | 0.006087 | 0.045227 |
| 203033_x_FH       | 0.005805 | 0.00037  | 0.006099 |
| 203036_s_MTSS1    | 0.009038 | 3.06E-05 | 0.000991 |
| 203039_s_NDUFS1   | 0.006929 | 0.002001 | 0.021045 |
| 203049_s_TTC37    | -0.00619 | 0.004232 | 0.035234 |
| 203064_s_FOXK2    | 0.004997 | 0.006083 | 0.045217 |
| 203071_at SEMA3B  | 0.007015 | 0.000568 | 0.008368 |
| 203080_s_BAZ2B    | -0.00555 | 0.006607 | 0.047895 |
| 203096_s_RAPGEF2  | 0.008236 | 0.002818 | 0.026747 |
| 203122_at TTC15   | 0.007635 | 0.001643 | 0.018282 |
| 203126_at IMPA2   | 0.008266 | 0.005859 | 0.043993 |
| 203129_s_KIF5C    | -0.00665 | 0.002299 | 0.023115 |
| 203131_at PDGFRA  | -0.01253 | 0.004047 | 0.034142 |
| 203132_at RB1     | -0.01099 | 5.09E-05 | 0.001469 |
| 203137_at WTAP    | -0.00533 | 0.001688 | 0.018614 |
| 203145_at SPAG5   | 0.018719 | 1.11E-06 | 0.000114 |
| 203147_s_TRIM14   | 0.00856  | 0.000163 | 0.003384 |
| 203148_s_TRIM14   | 0.006214 | 3.58E-03 | 0.031475 |
| 203149_at PVRL2   | 0.006201 | 0.005826 | 0.043818 |
| 203154_s_PAK4     | 0.006761 | 0.000193 | 0.003803 |
| 203157_s_GLS      | 0.011116 | 3.26E-05 | 0.001041 |
| 203158_s_GLS      | 0.012884 | 4.74E-08 | 1.88E-05 |
| 203159_at GLS     | 0.009368 | 3.61E-06 | 0.00024  |
| 203164_at SLC33A1 | 0.006512 | 0.000442 | 0.006976 |
| 203166_at CFDP1   | 0.006262 | 0.00012  | 0.002706 |
| 203173_s_C16orf62 | 0.005726 | 0.006012 | 0.044868 |
| 203178_at GATM    | 0.009567 | 0.00409  | 0.034355 |
| 203179_at GALT    | 0.006174 | 0.001673 | 0.018504 |
| 203185_at RASSF2  | -0.01065 | 1.55E-04 | 0.003268 |
| 203186_s_S100A4   | -0.01069 | 0.004538 | 0.036896 |
| 203188_at B3GNT1  | 0.008993 | 1.52E-05 | 0.00061  |
| 203192_at ABCB6   | 0.009591 | 6.22E-05 | 0.001685 |
| 203207_s_MTFR1    | 0.010207 | 2.83E-05 | 0.000944 |
| 203208_s_MTFR1    | 0.006972 | 0.001282 | 0.015257 |
| 203213_at CDK1    | -0.00685 | 0.000841 | 0.011149 |
| 203215_s_MYO6     | 0.00546  | 0.000309 | 0.00537  |
| 203217_s_ST3GAL5  | -0.00914 | 0.002784 | 0.026579 |
| 203220_s_TLE1     | -0.00675 | 0.004923 | 0.039054 |
| 203221_at TLE1    | -0.0085  | 0.001042 | 0.01305  |
| 203236_s_LGALS9   | -0.0069  | 3.29E-05 | 0.001046 |
| 203244_at PEX5    | 0.008897 | 0.000371 | 0.006104 |
| 203256_at CDH3    | -0.01178 | 0.00011  | 0.002548 |
| 203265_s_MAP2K4   | 0.004726 | 0.005456 | 0.041777 |
| 203278_s_PHF21A   | -0.00474 | 0.006373 | 0.04678  |
| 203280_at SAFB2   | 0.004103 | 0.00222  | 0.022506 |
| 203294_s_LMAN1    | 0.007087 | 0.002313 | 0.023227 |
| 203300_x_AP1S2    | -0.00897 | 0.001144 | 0.013997 |

|                    |          |          |          |
|--------------------|----------|----------|----------|
| 203302_at DCK      | -0.01206 | 3.22E-05 | 0.00103  |
| 203315_at NCK2     | -0.00515 | 0.004357 | 0.03593  |
| 203316_s_SNRPE     | -0.00375 | 0.001324 | 0.015612 |
| 203321_s_ADNP2     | 0.005547 | 0.000593 | 0.008594 |
| 203329_at PTPRM    | 0.002702 | 0.004662 | 0.037627 |
| 203332_s_INPP5D    | -0.00848 | 0.000209 | 0.004045 |
| 203335_at PHYH     | 0.009115 | 0.000614 | 0.008807 |
| 203350_at AP1G1    | 0.004498 | 0.000271 | 0.004875 |
| 203381_s_APOE      | 0.017962 | 3.46E-05 | 0.001084 |
| 203382_s_APOE      | 0.012398 | 2.84E-05 | 0.000945 |
| 203385_at DGKA     | -0.01704 | 4.01E-05 | 0.001218 |
| 203393_at HES1     | -0.00561 | 0.002204 | 0.022408 |
| 203397_s_GALNT3    | -0.00951 | 0.000628 | 0.008941 |
| 203402_at KCNAB2   | 0.010512 | 4.54E-06 | 0.000281 |
| 203414_at MMD      | -0.00579 | 0.003697 | 0.032197 |
| 203416_at CD53     | -0.02288 | 7.08E-07 | 8.67E-05 |
| 203423_at RBP1     | -0.01195 | 3.08E-06 | 0.000213 |
| 203424_s_IGFBP5    | 0.009373 | 0.004012 | 0.033993 |
| 203425_s_IGFBP5    | 0.010745 | 0.000787 | 0.010652 |
| 203431_s_ARHGAP3   | 0.008109 | 0.000954 | 0.01219  |
| 203433_at MTHFS    | 0.009321 | 9.37E-06 | 0.000441 |
| 203434_s_MME       | 0.019818 | 3.83E-07 | 5.93E-05 |
| 203435_s_MME       | 0.020199 | 6.06E-08 | 2.33E-05 |
| 203438_at STC2     | 0.010507 | 0.001157 | 0.014097 |
| 203439_s_STC2      | 0.008383 | 6.45E-05 | 0.001724 |
| 203440_at CDH2     | 0.008355 | 0.002447 | 0.024172 |
| 203441_s_CDH2      | 0.011701 | 7.95E-08 | 2.62E-05 |
| 203455_s_SAT1      | -0.00404 | 2.81E-03 | 0.026714 |
| 203466_at MPV17    | 0.007344 | 0.001889 | 0.020154 |
| 203471_s_PLEK      | -0.01455 | 4.6E-06  | 0.000282 |
| 203476_at TPBG     | -0.00956 | 0.000974 | 0.012378 |
| 203493_s_CEP57     | -0.00737 | 0.001247 | 0.014954 |
| 203500_at GCDH     | 0.009252 | 0.000356 | 0.005952 |
| 203504_s_ABCA1     | 0.007474 | 0.003326 | 0.029996 |
| 203508_at TNFRSF1E | -0.00793 | 0.000769 | 0.010466 |
| 203516_at SNTA1    | 0.005348 | 0.004143 | 0.03472  |
| 203523_at LSP1     | -0.00701 | 0.005551 | 0.042291 |
| 203532_x_CUL5      | 0.005188 | 0.006512 | 0.047394 |
| 203535_at S100A9   | -0.00876 | 0.000155 | 0.003278 |
| 203536_s_CIAO1     | 0.006125 | 0.000427 | 0.006793 |
| 203537_at PRPSAP2  | 0.006297 | 0.004303 | 0.035622 |
| 203542_s_KLF9      | 0.009751 | 0.0002   | 0.003914 |
| 203543_s_KLF9      | 0.011145 | 0.000313 | 0.005398 |
| 203546_at IPO13    | 0.009759 | 6.03E-05 | 0.001644 |
| 203547_at CD4      | -0.0083  | 0.001145 | 0.013998 |
| 203554_x_PTTG1     | -0.00688 | 0.004303 | 0.035622 |
| 203559_s_ABP1      | 0.025915 | 1.63E-08 | 1.04E-05 |
| 203560_at GGH      | 0.01544  | 9.72E-06 | 0.000451 |
| 203561_at FCGR2A   | -0.00897 | 0.003472 | 0.030814 |
| 203603_s_ZEB2      | -0.01349 | 5.85E-05 | 0.001614 |
| 203606_at NDUFS6   | 0.003787 | 0.00132  | 0.0156   |
| 203608_at ALDH5A1  | 0.012579 | 0.000122 | 0.002756 |
| 203609_s_ALDH5A1   | 0.00899  | 0.000134 | 0.00294  |

|                    |          |          |          |
|--------------------|----------|----------|----------|
| 203619_s_FAIM2     | -0.00756 | 1.73E-05 | 0.00066  |
| 203627_at_IGF1R    | 0.011541 | 9.02E-06 | 0.000437 |
| 203628_at_IGF1R    | 0.010993 | 6.32E-07 | 8.09E-05 |
| 203633_at_CPT1A    | 0.004605 | 0.001532 | 0.017422 |
| 203634_s_CPT1A     | 0.01032  | 0.000188 | 0.003738 |
| 203638_s_FGFR2     | 0.007832 | 0.001077 | 0.013384 |
| 203639_s_FGFR2     | 0.010963 | 8.58E-05 | 0.002126 |
| 203644_s_MON1B     | 0.004016 | 0.00261  | 0.02534  |
| 203645_s_CD163     | -0.01537 | 9.52E-06 | 0.000445 |
| 203658_at_SLC25A20 | 0.010316 | 0.002167 | 0.022182 |
| 203659_s_TRIM13    | 0.00646  | 0.003985 | 0.033818 |
| 203660_s_PCNT      | 0.006594 | 0.001834 | 0.019754 |
| 203665_at_HMOX1    | 0.007438 | 0.006997 | 0.049561 |
| 203671_at_TPMT     | 0.01047  | 2.18E-06 | 0.000171 |
| 203672_x_TPMT      | 0.005216 | 1.27E-03 | 0.015165 |
| 203676_at_GNS      | 0.007794 | 0.001115 | 0.013741 |
| 203682_s_IVD       | 0.009992 | 5.81E-05 | 0.00161  |
| 203684_s_BCL2      | 0.007703 | 0.00209  | 0.021582 |
| 203691_at_PI3      | -0.00542 | 0.003934 | 0.033539 |
| 203697_at_FRZB     | -0.00921 | 0.001665 | 0.018461 |
| 203699_s_DIO2      | 0.013593 | 9.38E-05 | 0.002268 |
| 203700_s_DIO2      | 0.007791 | 0.000276 | 0.004933 |
| 203704_s_RREB1     | 0.006642 | 0.003395 | 0.030299 |
| 203708_at_PDE4B    | -0.00951 | 0.001304 | 0.015449 |
| 203711_s_HIBCH     | 0.010448 | 0.000275 | 0.004929 |
| 203716_s_DPP4      | 0.015297 | 1.62E-06 | 0.000144 |
| 203717_at_DPP4     | 0.012638 | 3.91E-05 | 0.001193 |
| 203718_at_PNPLA6   | 0.0044   | 4.49E-03 | 0.036611 |
| 203722_at_ALDH4A1  | 0.014503 | 1.93E-05 | 0.000712 |
| 203725_at_GADD45A  | 0.007801 | 9.48E-05 | 0.002284 |
| 203727_at_SKIV2L   | 0.005106 | 0.0003   | 0.005246 |
| 203733_at_DEXI     | 0.005872 | 0.002384 | 0.023703 |
| 203741_s_ADCY7     | -0.00841 | 0.000447 | 0.007043 |
| 203753_at_TCF4     | -0.00864 | 0.005172 | 0.040319 |
| 203756_at_ARHGEF1  | 0.004754 | 0.004971 | 0.039266 |
| 203760_s_SLA       | -0.00628 | 0.001207 | 0.014589 |
| 203761_at_SLA      | -0.01014 | 0.001481 | 0.017001 |
| 203764_at_DLGAP5   | -0.00536 | 2.48E-03 | 0.024392 |
| 203765_at_GCA      | -0.00637 | 7.91E-05 | 0.001998 |
| 203775_at_SLC25A13 | 0.008563 | 0.001147 | 0.014001 |
| 203780_at_MPZL2    | -0.00831 | 0.001543 | 0.017477 |
| 203784_s_DDX28     | -0.00507 | 0.000442 | 0.006976 |
| 203786_s_TPD52L1   | -0.00784 | 0.001531 | 0.017422 |
| 203787_at_SSBP2    | -0.00788 | 0.001009 | 0.012721 |
| 203790_s_HRSP12    | 0.016292 | 4.74E-06 | 0.000286 |
| 203793_x_PCGF2     | 0.006962 | 0.003445 | 0.030625 |
| 203799_at_CD302    | -0.01169 | 4.06E-05 | 0.001229 |
| 203803_at_PCYOX1   | 0.009728 | 0.004908 | 0.038995 |
| 203808_at_AKT2     | 0.005907 | 0.005502 | 0.042017 |
| 203809_s_AKT2      | 0.010523 | 0.000188 | 0.003744 |
| 203814_s_NQO2      | 0.017152 | 2.56E-06 | 0.000188 |
| 203818_s_SF3A3     | 0.007883 | 0.00033  | 0.005628 |
| 203824_at_TSPAN8   | -0.011   | 0.006047 | 0.045037 |

|                    |           |          |          |
|--------------------|-----------|----------|----------|
| 203827_at WIP11    | 0.005593  | 0.004204 | 0.035091 |
| 203834_s_TGOLN2    | 0.008976  | 0.000128 | 0.002852 |
| 203854_at CFI      | 0.011518  | 5.1E-05  | 0.001469 |
| 203860_at PCCA     | 0.006899  | 7.79E-05 | 0.001986 |
| 203892_at WFDC2    | -0.01872  | 1.61E-06 | 0.000144 |
| 203895_at PLCB4    | -0.00903  | 0.000491 | 0.007508 |
| 203896_s_PLCB4     | -0.00913  | 0.000951 | 0.012167 |
| 203900_at KIAA0467 | 0.006301  | 3.5E-05  | 0.001095 |
| 203903_s_HEPH      | -0.00821  | 0.002058 | 0.02135  |
| 203907_s_IQSEC1    | 0.006135  | 0.002264 | 0.022851 |
| 203908_at SLC4A4   | 0.017031  | 9.74E-06 | 0.000451 |
| 203914_x_HPGD      | 0.010837  | 0.006211 | 0.045797 |
| 203922_s_CYBB      | -1.29E-02 | 0.000525 | 0.007909 |
| 203923_s_CYBB      | -0.01427  | 3.9E-05  | 0.001192 |
| 203924_at GSTA1    | 0.021795  | 6.69E-06 | 0.00036  |
| 203927_at NFKBIE   | -0.00505  | 0.000347 | 0.00585  |
| 203928_x_MAPT      | 0.016076  | 4.76E-06 | 0.000286 |
| 203929_s_MAPT      | 0.017485  | 2.2E-07  | 4.05E-05 |
| 203930_s_MAPT      | 0.021368  | 1.39E-05 | 0.00058  |
| 203932_at HLA-DMB  | -0.01066  | 0.000106 | 0.002474 |
| 203933_at RAB11FIP | 0.009466  | 3.08E-05 | 0.000997 |
| 203950_s_CLCN6     | 0.010311  | 0.000204 | 0.003966 |
| 203955_at KIAA0649 | 0.007839  | 0.000575 | 0.008435 |
| 203959_s_ZBTB40    | 0.009156  | 0.000362 | 0.006034 |
| 203961_at NEBL     | 0.008692  | 0.000393 | 0.006416 |
| 203962_s_NEBL      | 0.008635  | 0.004681 | 0.037714 |
| 203964_at NMI      | -0.00883  | 1.5E-05  | 0.000606 |
| 203971_at SLC31A1  | 0.006526  | 0.0005   | 0.007612 |
| 203978_at NUBP1    | 0.004844  | 0.004443 | 0.036322 |
| 203979_at CYP27A1  | 0.009641  | 5.8E-06  | 0.00033  |
| 203986_at FAM47E   | 0.009949  | 2.7E-06  | 0.000196 |
| 204017_at KDELR3   | -0.00948  | 0.001777 | 0.019369 |
| 204018_x_HBA1      | -0.02112  | 8.05E-05 | 0.002025 |
| 204036_at LPAR1    | -0.01356  | 1.34E-05 | 0.000564 |
| 204037_at LPAR1    | -0.01177  | 0.000178 | 0.003608 |
| 204041_at MAOB     | 0.011638  | 3.57E-06 | 0.000238 |
| 204043_at TCN2     | 0.010676  | 0.000259 | 0.004701 |
| 204044_at QPRT     | 0.013942  | 1.6E-05  | 0.000624 |
| 204046_at PLCB2    | -0.00479  | 0.002502 | 0.024549 |
| 204057_at IRF8     | -0.01291  | 1.17E-06 | 0.000118 |
| 204066_s_AGAP1     | 0.013824  | 4.54E-06 | 0.000281 |
| 204067_at SUOX     | 0.008554  | 0.000603 | 0.0087   |
| 204115_at GNG11    | -0.00752  | 0.000215 | 0.004125 |
| 204116_at IL2RG    | -0.01415  | 0.000439 | 0.006939 |
| 204118_at CD48     | -0.02689  | 2.08E-07 | 3.97E-05 |
| 204122_at TYROBP   | -0.01554  | 8.46E-05 | 0.002106 |
| 204125_at NDUFAF1  | 0.008299  | 0.000554 | 0.008237 |
| 204130_at HSD11B2  | 0.010956  | 0.000429 | 0.006809 |
| 204137_at GPR137B  | 0.011361  | 0.000186 | 0.003706 |
| 204142_at ENOSF1   | 0.009518  | 0.000312 | 0.005398 |
| 204143_s_ENOSF1    | 0.009848  | 4.64E-05 | 0.001368 |
| 204153_s_MFNG      | -0.00584  | 0.000798 | 0.010723 |
| 204155_s_SIK3      | 0.006808  | 0.001798 | 0.019502 |

|                    |          |          |          |
|--------------------|----------|----------|----------|
| 204157_s_SIK3      | 0.008653 | 0.000687 | 0.009594 |
| 204158_s_TCIRG1    | -0.00578 | 0.004645 | 0.03753  |
| 204164_at_SIPA1    | -0.00369 | 0.003151 | 0.028761 |
| 204167_at_BTD      | 0.012056 | 0.000105 | 0.00246  |
| 204168_at_MGST2    | 0.004876 | 0.000551 | 0.0082   |
| 204174_at_ALOX5AP  | -0.01239 | 0.002785 | 0.026579 |
| 204177_s_KLHL20    | 0.005539 | 0.001058 | 0.013191 |
| 204192_at_CD37     | -0.00777 | 0.001446 | 0.016664 |
| 204194_at_BACH1    | -0.00559 | 0.005375 | 0.04145  |
| 204204_at_SLC31A2  | 0.0106   | 0.000408 | 0.006572 |
| 204205_at_APOBEC3  | -0.01735 | 4.52E-07 | 6.52E-05 |
| 204220_at_GMFG     | -0.0127  | 0.00048  | 0.007408 |
| 204222_s_GLIPR1    | -0.01279 | 2.86E-05 | 0.00095  |
| 204224_s_GCH1      | 0.01304  | 2.96E-05 | 0.000973 |
| 204231_s_FAAH      | 0.010113 | 0.000117 | 0.002662 |
| 204232_at_FCER1G   | -0.01961 | 2.39E-06 | 0.000181 |
| 204236_at_FLI1     | -0.00888 | 0.000706 | 0.009797 |
| 204245_s_RPP14     | 0.006137 | 0.003572 | 0.031398 |
| 204248_at_GNA11    | 0.007806 | 0.006159 | 0.045537 |
| 204255_s_VDR       | 0.010042 | 2.55E-05 | 0.000876 |
| 204259_at_MMP7     | -0.01473 | 0.000785 | 0.010637 |
| 204260_at_CHGB     | 0.014109 | 0.000106 | 0.002474 |
| 204264_at_CPT2     | 0.006631 | 0.001946 | 0.020629 |
| 204265_s_GPSM3     | -0.00674 | 0.001104 | 0.013668 |
| 204269_at_PIM2     | -0.00579 | 0.001373 | 0.016003 |
| 204273_at_EDNRB    | -0.00781 | 0.005129 | 0.040102 |
| 204289_at_LOC10050 | 0.014915 | 1.89E-06 | 0.000158 |
| 204290_s_ALDH6A1   | 0.017312 | 3.28E-08 | 1.59E-05 |
| 204294_at_AMT      | 0.011134 | 1.91E-06 | 0.000158 |
| 204296_at_DCTN1    | -0.00607 | 0.000859 | 0.011319 |
| 204300_at_PET112L  | 0.00688  | 0.00436  | 0.035936 |
| 204301_at_KBTBD11  | 0.01217  | 8.65E-08 | 2.63E-05 |
| 204302_s_KIAA0427  | 0.006648 | 0.0021   | 0.021666 |
| 204304_s_PROM1     | -0.0126  | 0.005857 | 0.04399  |
| 204305_at_MIPEP    | 0.006813 | 0.002936 | 0.027482 |
| 204310_s_NPR2      | 0.007018 | 4.28E-05 | 0.001284 |
| 204311_at_ATP1B2   | 0.012778 | 0.000586 | 0.008528 |
| 204313_s_CREB1     | -0.00457 | 0.006683 | 0.048134 |
| 204316_at_RGS10    | -0.00827 | 0.000166 | 0.003414 |
| 204319_s_RGS10     | -0.01306 | 1.01E-06 | 0.000108 |
| 204321_at_NEO1     | 0.006648 | 0.000185 | 0.003692 |
| 204323_x_NF1       | 0.007027 | 0.00182  | 0.019657 |
| 204324_s_GOLIM4    | 0.006299 | 0.00179  | 0.019443 |
| 204326_x_MT1X      | 0.009047 | 0.002743 | 0.026284 |
| 204328_at_TMC6     | -0.00727 | 0.00156  | 0.017574 |
| 204342_at_SLC25A24 | -0.00706 | 0.004918 | 0.039046 |
| 204345_at_COL16A1  | -0.00942 | 9.01E-06 | 0.000437 |
| 204347_at_AK4      | 0.016794 | 1.2E-06  | 0.000119 |
| 204348_s_AK4       | 0.011262 | 4.45E-05 | 0.001323 |
| 204352_at_TRAF5    | -0.0072  | 0.00111  | 0.013698 |
| 204360_s_NAGLU     | 0.007883 | 2.02E-03 | 0.021129 |
| 204379_s_FGFR3     | 0.011138 | 7.92E-05 | 0.001998 |
| 204385_at_KYNU     | 0.01299  | 9.26E-05 | 0.002246 |

|                     |          |          |          |
|---------------------|----------|----------|----------|
| 204388_s_MAOA       | 0.014748 | 1.88E-05 | 0.0007   |
| 204389_at_MAOA      | 0.012279 | 0.000161 | 0.003362 |
| 204400_at_EFS       | -0.00746 | 0.006747 | 0.048407 |
| 204405_x_DIMT1L     | -0.0051  | 0.004481 | 0.036543 |
| 204415_at_IFI6      | -0.0096  | 3.17E-05 | 0.00102  |
| 204419_x_HBG1       | -0.00635 | 0.00649  | 0.047307 |
| 204420_at_FOSL1     | 0.009987 | 0.003692 | 0.032166 |
| 204423_at_MKLN1     | 0.006423 | 0.002331 | 0.023341 |
| 204429_s_SLC2A5     | 0.014233 | 7.88E-07 | 9.24E-05 |
| 204430_s_SLC2A5     | 0.020583 | 4.21E-08 | 1.79E-05 |
| 204436_at_PLEKHO2   | -0.00899 | 4.31E-06 | 0.00027  |
| 204438_at_MRC1      | -0.01281 | 0.000214 | 0.00411  |
| 204440_at_CD83      | 0.009436 | 0.000527 | 0.007929 |
| 204446_s_ALOX5      | -0.01004 | 0.000334 | 0.005692 |
| 204447_at_ProSAPiP1 | 0.007536 | 0.000991 | 0.01254  |
| 204456_s_GAS1       | -0.00459 | 0.005968 | 0.04464  |
| 204458_at_PLA2G15   | 0.005736 | 0.002966 | 0.027586 |
| 204462_s_SLC16A2    | 0.008401 | 0.001128 | 0.013831 |
| 204464_s_EDNRA      | -0.00904 | 0.00178  | 0.01938  |
| 204476_s_PC         | 0.010501 | 4.16E-05 | 0.001255 |
| 204486_at           | -0.00588 | 2.91E-05 | 0.000959 |
| 204488_at_DOLK      | 0.007995 | 5.73E-05 | 0.001602 |
| 204489_s_CD44       | -0.01432 | 0.002207 | 0.022426 |
| 204490_s_CD44       | -0.01297 | 0.001272 | 0.015166 |
| 204497_at_ADCY9     | 0.008622 | 0.000267 | 0.004817 |
| 204498_s_ADCY9      | 0.005421 | 0.003412 | 0.03042  |
| 204501_at_NOV       | -0.00511 | 0.005785 | 0.04358  |
| 204502_at_SAMHD1    | -0.01407 | 9.03E-05 | 0.002213 |
| 204505_s_EPB49      | 0.007084 | 0.003364 | 0.030146 |
| 204510_at_CDC7      | -0.00914 | 0.002781 | 0.026568 |
| 204517_at_PPIC      | -0.00479 | 0.004018 | 0.034025 |
| 204524_at_PDPK1     | 0.008707 | 0.000606 | 0.00873  |
| 204528_s_NAP1L1     | -0.00467 | 0.000238 | 0.004438 |
| 204529_s_TOX        | -0.00848 | 0.000987 | 0.012511 |
| 204532_x_UGT1A1     | 0.013488 | 5.73E-05 | 0.001602 |
| 204533_at_CXCL10    | -0.00634 | 0.006053 | 0.045063 |
| 204534_at_VTN       | 0.007871 | 0.000292 | 0.005143 |
| 204549_at_IKBKE     | -0.00406 | 0.004438 | 0.036297 |
| 204556_s_DZIP1      | 0.006233 | 0.000514 | 0.007779 |
| 204560_at_FKBP5     | 0.013885 | 0.002021 | 0.021163 |
| 204563_at_SELL      | -0.01415 | 8.98E-06 | 0.000437 |
| 204565_at_ACOT13    | 0.0092   | 9.54E-05 | 0.002293 |
| 204584_at_L1CAM     | -0.00799 | 0.000798 | 0.010723 |
| 204588_s_SLC7A7     | 0.022142 | 1.01E-08 | 7.75E-06 |
| 204589_at_NUAK1     | -0.01006 | 1.83E-04 | 0.003683 |
| 204593_s_SMCR7L     | 0.007495 | 0.002908 | 0.027315 |
| 204594_s_SMCR7L     | 0.006218 | 0.001119 | 0.013745 |
| 204595_s_STC1       | 0.01704  | 0.000165 | 0.003413 |
| 204596_s_STC1       | 0.017356 | 0.000105 | 0.002464 |
| 204606_at_CCL21     | -0.01934 | 2.28E-06 | 0.000176 |
| 204607_at_HMGCS2    | 0.01301  | 0.00217  | 0.022193 |
| 204608_at_AS1       | 0.012185 | 0.000228 | 0.004289 |
| 204610_s_CCDC85B    | -0.00375 | 0.006093 | 0.045231 |

|                    |          |          |          |
|--------------------|----------|----------|----------|
| 204619_s_VCAN      | -0.01162 | 0.000215 | 0.004116 |
| 204620_s_VCAN      | -0.01595 | 0.000638 | 0.009072 |
| 204636_at COL17A1  | -0.00482 | 0.003271 | 0.02965  |
| 204638_at ACP5     | 0.013066 | 3.48E-05 | 0.001088 |
| 204655_at CCL5     | -0.01393 | 5.46E-05 | 0.001541 |
| 204658_at TRA2A    | -0.0071  | 0.000461 | 0.007215 |
| 204661_at CD52     | -0.02081 | 3.16E-05 | 0.001019 |
| 204668_at RNF24    | -0.00681 | 0.006635 | 0.047992 |
| 204680_s_RAPGEF5   | -0.00573 | 0.002055 | 0.021332 |
| 204681_s_RAPGEF5   | -0.00611 | 0.003401 | 0.030344 |
| 204687_at PARM1    | 0.008649 | 0.00651  | 0.047394 |
| 204698_at ISG20    | -0.01081 | 0.001833 | 0.019754 |
| 204703_at IFT88    | 0.004514 | 0.001013 | 0.012751 |
| 204704_s_ALDOB     | 0.021784 | 1.57E-05 | 0.000619 |
| 204705_x_ALDOB     | 0.021959 | 4.08E-07 | 6.11E-05 |
| 204719_at ABCA8    | -0.01232 | 0.00359  | 0.031482 |
| 204729_s_STX1A     | -0.00392 | 0.006332 | 0.046566 |
| 204731_at TGFBR3   | 0.010918 | 2.18E-05 | 0.000778 |
| 204745_x_MT1G      | 0.011066 | 0.004362 | 0.035938 |
| 204774_at EVI2A    | -0.02205 | 8.36E-08 | 2.62E-05 |
| 204775_at CHAF1B   | -0.00591 | 0.000204 | 0.003966 |
| 204778_x_HOXB7     | -0.00492 | 0.001906 | 0.020284 |
| 204780_s_FAS       | -0.01167 | 5.96E-06 | 0.000335 |
| 204781_s_FAS       | -0.00913 | 5.26E-05 | 0.001503 |
| 204785_x_IFNAR2    | -0.00907 | 4.71E-05 | 0.001386 |
| 204787_at VSIG4    | -0.00626 | 0.004643 | 0.037527 |
| 204789_at FMNL1    | -0.00489 | 0.006353 | 0.046661 |
| 204795_at PRR3     | -0.00525 | 0.003616 | 0.031624 |
| 204797_s_EML1      | 0.005357 | 0.001857 | 0.019915 |
| 204798_at MYB      | -0.0135  | 6.72E-06 | 0.000361 |
| 204812_at ZW10     | 0.007783 | 0.000537 | 0.008035 |
| 204817_at ESPL1    | 0.008205 | 0.002042 | 0.021275 |
| 204820_s_BTN3A2    | -0.00801 | 0.004752 | 0.038128 |
| 204824_at ENDOG    | 0.006094 | 0.002126 | 0.021839 |
| 204829_s_FOLR2     | -0.01019 | 0.000335 | 0.005697 |
| 204834_at FGL2     | -0.01005 | 0.000334 | 0.005689 |
| 204836_at GLDC     | 0.011405 | 1.74E-05 | 0.000662 |
| 204844_at ENPEP    | 0.015274 | 0.000189 | 0.003751 |
| 204845_s_ENPEP     | 0.019585 | 9.58E-06 | 0.000447 |
| 204846_at CP       | -0.01868 | 3.67E-05 | 0.001138 |
| 204848_x_HBG1      | -0.00736 | 0.00022  | 0.004197 |
| 204882_at ARHGAP2  | -0.01059 | 0.000618 | 0.008834 |
| 204885_s_MSLN      | -0.00542 | 0.002218 | 0.022506 |
| 204890_s_LCK       | -0.0106  | 1.02E-05 | 0.00047  |
| 204893_s_ZFYVE9    | 0.005805 | 0.000223 | 0.004232 |
| 204899_s_SAP30     | -0.00465 | 0.002932 | 0.02747  |
| 204912_at IL10RA   | -0.01054 | 9.43E-05 | 0.002275 |
| 204922_at C11orf80 | -0.00592 | 0.001634 | 0.018224 |
| 204923_at SASH3    | -0.01517 | 1.87E-06 | 0.000157 |
| 204932_at TNFRSF11 | -0.00624 | 0.005308 | 0.041112 |
| 204934_s_HPN       | 0.010394 | 0.002164 | 0.022166 |
| 204944_at PTPRG    | 0.004858 | 0.004844 | 0.038661 |
| 204951_at RHOH     | -0.01625 | 4.23E-06 | 0.000268 |

|                    |          |          |          |
|--------------------|----------|----------|----------|
| 204955_at SRPX     | -0.00784 | 3.98E-05 | 0.001214 |
| 204959_at MNDA     | -0.02124 | 3.17E-08 | 1.57E-05 |
| 204960_at PTPRCAP  | -0.00838 | 7.88E-05 | 0.001996 |
| 204961_s_NCF1      | -0.00655 | 0.002624 | 0.025437 |
| 204962_s_CENPA     | -0.00583 | 0.003086 | 0.028369 |
| 204963_at SSPN     | -0.00806 | 0.001711 | 0.018792 |
| 204964_s_SSPN      | -0.00483 | 0.006632 | 0.047986 |
| 204970_s_MAFG      | 0.006189 | 0.000224 | 0.004239 |
| 204971_at CSTA     | -0.01775 | 3.76E-06 | 0.000245 |
| 204972_at OAS2     | -0.00856 | 0.000322 | 0.005515 |
| 204973_at GJB1     | 0.013579 | 1.86E-06 | 0.000157 |
| 204977_at DDX10    | 0.012725 | 7.03E-05 | 0.001837 |
| 204979_s_SH3BGR    | 0.005973 | 0.005668 | 0.04293  |
| 204981_at SLC22A18 | 0.009592 | 0.004342 | 0.035852 |
| 204984_at GPC4     | 0.008959 | 0.001501 | 0.017161 |
| 204994_at MX2      | -0.00976 | 7.5E-05  | 0.001932 |
| 204997_at GPD1     | 0.014654 | 0.000262 | 0.004748 |
| 205012_s_HAGH      | 0.012665 | 1.5E-06  | 0.000138 |
| 205014_at FGFBP1   | -0.00557 | 0.001597 | 0.017894 |
| 205021_s_FOXN3     | -0.00656 | 0.003823 | 0.032935 |
| 205038_at IKZF1    | -0.00557 | 0.006908 | 0.049212 |
| 205039_s_IKZF1     | -0.01191 | 0.000124 | 0.002789 |
| 205040_at ORM1     | -0.00474 | 0.001857 | 0.019915 |
| 205044_at GABRP    | -0.01332 | 2.22E-05 | 0.00079  |
| 205052_at AUH      | 0.007699 | 0.000234 | 0.004376 |
| 205065_at ENPP1    | 0.008537 | 0.003279 | 0.029681 |
| 205073_at CYP2J2   | 0.009987 | 0.000482 | 0.007433 |
| 205074_at SLC22A5  | 0.012764 | 1.36E-06 | 0.00013  |
| 205075_at SERPINF2 | 0.012928 | 4.54E-07 | 6.52E-05 |
| 205076_s_MTMR11    | 0.007092 | 0.001562 | 0.01759  |
| 205079_s_MPDZ      | 0.00693  | 0.006905 | 0.049207 |
| 205081_at CRIP1    | -0.0154  | 5.95E-05 | 0.00163  |
| 205082_s_AOX1      | 0.014437 | 6.34E-05 | 0.001704 |
| 205083_at AOX1     | 0.015248 | 0.000212 | 0.004085 |
| 205093_at PLEKHA6  | 0.007016 | 0.002924 | 0.027411 |
| 205095_s_ATP6V0A1  | 0.013849 | 5.36E-05 | 0.001526 |
| 205110_s_FGF13     | -0.00733 | 0.001132 | 0.013879 |
| 205119_s_FPR1      | -0.00653 | 0.000294 | 0.005177 |
| 205120_s_SGCB      | 0.008301 | 0.000453 | 0.007123 |
| 205121_at SGCB     | 0.006757 | 0.002945 | 0.027494 |
| 205131_x_CLEC11A   | -0.00485 | 0.000102 | 0.002406 |
| 205133_s_HSPE1     | 0.004305 | 0.006744 | 0.048402 |
| 205137_x_USH1C     | 0.010763 | 0.001419 | 0.016409 |
| 205141_at ANG      | 0.012566 | 1.08E-05 | 0.000491 |
| 205147_x_NCF4      | -0.00704 | 0.001923 | 0.020437 |
| 205149_s_CLCN4     | 0.005006 | 0.000874 | 0.011434 |
| 205159_at CSF2RB   | -0.0139  | 6.5E-05  | 0.001732 |
| 205166_at CAPN5    | 0.00768  | 0.003441 | 0.030599 |
| 205173_x_CD58      | -0.00593 | 0.001041 | 0.01305  |
| 205175_s_KHK       | 0.013398 | 5.8E-05  | 0.00161  |
| 205201_at GLI3     | 0.007402 | 7.52E-05 | 0.001932 |
| 205203_at PLD1     | 0.009897 | 0.000176 | 0.00358  |
| 205208_at ALDH1L1  | 0.016166 | 2.73E-06 | 0.000198 |



|                   |          |          |          |
|-------------------|----------|----------|----------|
| 205213_at ACAP1   | -0.00592 | 0.003856 | 0.033116 |
| 205214_at STK17B  | -0.0141  | 1.97E-05 | 0.000723 |
| 205216_s_APOH     | 0.028277 | 1.49E-08 | 1.01E-05 |
| 205219_s_GALK2    | 0.008853 | 0.000702 | 0.009762 |
| 205221_at HGD     | 0.011072 | 8.63E-05 | 0.002135 |
| 205222_at EHHADH  | 0.010387 | 0.00049  | 0.007503 |
| 205229_s_COCH     | 0.010225 | 0.002321 | 0.023275 |
| 205231_s_EPM2A    | 0.007354 | 0.002028 | 0.021196 |
| 205233_s_PAFAH2   | 0.007067 | 0.005394 | 0.041551 |
| 205238_at TRMT2B  | 0.010157 | 5.94E-06 | 0.000334 |
| 205242_at CXCL13  | -0.00894 | 0.003479 | 0.030851 |
| 205243_at SLC13A3 | 0.027835 | 2.46E-08 | 1.37E-05 |
| 205244_s_SLC13A3  | 0.029798 | 9.89E-10 | 2.2E-06  |
| 205253_at PBX1    | 0.006709 | 0.006913 | 0.04922  |
| 205267_at POU2AF1 | -0.01782 | 0.000877 | 0.011459 |
| 205269_at LCP2    | -0.01284 | 1.62E-05 | 0.000628 |
| 205270_s_LCP2     | -0.01169 | 0.001915 | 0.020367 |
| 205271_s_CDK20    | 0.005095 | 0.00321  | 0.029188 |
| 205273_s_PITRM1   | 0.005666 | 0.004609 | 0.037323 |
| 205278_at GAD1    | 0.008928 | 0.003937 | 0.03354  |
| 205285_s_FYB      | -0.01499 | 2.27E-05 | 0.000798 |
| 205291_at IL2RB   | -0.00917 | 7.1E-05  | 0.001851 |
| 205295_at CKMT2   | 0.009319 | 0.00375  | 0.032531 |
| 205303_at KCNJ8   | -0.01019 | 0.002023 | 0.021165 |
| 205304_s_KCNJ8    | -0.01266 | 0.000158 | 0.003303 |
| 205306_x_KMO      | 0.020509 | 2.6E-06  | 0.00019  |
| 205307_s_KMO      | 0.019736 | 5.75E-06 | 0.000328 |
| 205311_at DDC     | 0.024102 | 2.1E-07  | 3.97E-05 |
| 205312_at SPI1    | -0.00635 | 0.000558 | 0.008267 |
| 205315_s_SNTB2    | 0.008662 | 7.46E-05 | 0.001927 |
| 205328_at CLDN10  | 0.005768 | 0.004943 | 0.039118 |
| 205329_s_SNX4     | 0.003955 | 0.002001 | 0.021045 |
| 205336_at PVALB   | 0.009949 | 0.005871 | 0.044053 |
| 205340_at ZBTB24  | -0.00604 | 0.006064 | 0.045121 |
| 205342_s_SULT1C2  | 0.009758 | 0.000997 | 0.012597 |
| 205343_at SULT1C2 | 0.005718 | 0.004238 | 0.03525  |
| 205350_at CRABP1  | 0.007974 | 0.002455 | 0.024231 |
| 205351_at GGCX    | 0.010677 | 0.000153 | 0.00325  |
| 205353_s_PEBP1    | 6.01E-03 | 0.000457 | 0.007176 |
| 205355_at ACADSB  | 0.010604 | 0.000222 | 0.004222 |
| 205361_s_PFDN4    | -0.00702 | 0.006504 | 0.047378 |
| 205364_at ACOX2   | 0.019641 | 1.39E-06 | 0.000132 |
| 205365_at HOXB6   | -0.00756 | 0.001444 | 0.01666  |
| 205366_s_HOXB6    | -0.00573 | 0.006744 | 0.048402 |
| 205368_at FAM131B | -0.00635 | 0.001531 | 0.017422 |
| 205369_x_DBT      | 0.007931 | 0.000399 | 0.00647  |
| 205376_at INPP4B  | -0.00753 | 0.002169 | 0.022193 |
| 205379_at CBR3    | -0.01017 | 5.1E-05  | 0.001469 |
| 205380_at PDZK1   | 0.009638 | 2.89E-05 | 0.000957 |
| 205382_s_CFD      | -0.00847 | 0.000504 | 0.007653 |
| 205397_x_SMAD3    | 0.00782  | 0.006503 | 0.047378 |
| 205403_at IL1R2   | -0.00722 | 0.003939 | 0.03354  |
| 205412_at ACAT1   | 0.011888 | 5.12E-06 | 0.000301 |

|                    |          |          |          |
|--------------------|----------|----------|----------|
| 205419_at GPR183   | -0.01469 | 0.000337 | 0.005721 |
| 205429_s_MPP6      | 0.00944  | 0.000521 | 0.007858 |
| 205430_at BMP5     | -0.0075  | 4.41E-03 | 0.036155 |
| 205440_s_NPY1R     | -0.01007 | 0.001805 | 0.019538 |
| 205442_at MFAP3L   | 0.006082 | 0.006989 | 0.049539 |
| 205443_at SNAPC1   | -0.00602 | 0.002195 | 0.022367 |
| 205448_s_MAP3K12   | 0.006879 | 0.000617 | 0.008833 |
| 205451_at FOXO4    | 0.005001 | 0.001993 | 0.021007 |
| 205453_at HOXB2    | -0.0055  | 0.005095 | 0.040007 |
| 205457_at C6orf106 | 0.003452 | 0.005114 | 0.040067 |
| 205464_at SCNN1B   | 0.008149 | 1.32E-05 | 0.000557 |
| 205469_s_IRF5      | -0.00455 | 0.005458 | 0.041777 |
| 205483_s_ISG15     | -0.00779 | 0.000197 | 0.003864 |
| 205484_at SIT1     | -0.00797 | 0.000234 | 0.004369 |
| 205488_at GZMA     | -0.01971 | 1.54E-06 | 0.00014  |
| 205489_at CRYM     | 0.012706 | 5.3E-07  | 7.3E-05  |
| 205495_s_GNLY      | -0.00655 | 0.002052 | 0.021323 |
| 205498_at GHR      | 0.008952 | 0.005504 | 0.042017 |
| 205499_at SRPX2    | -0.00947 | 0.001492 | 0.01708  |
| 205501_at PDE10A   | 0.00913  | 0.005041 | 0.03971  |
| 205502_at CYP17A1  | 0.016862 | 2.25E-05 | 0.000795 |
| 205504_at BTK      | -0.00972 | 1.74E-06 | 0.000152 |
| 205505_at GCNT1    | -0.00596 | 0.004001 | 0.033916 |
| 205506_at VIL1     | 0.012956 | 2.16E-05 | 0.000775 |
| 205508_at SCN1B    | -0.00465 | 0.002226 | 0.02256  |
| 205512_s_AIFM1     | 0.012307 | 2.17E-05 | 0.000778 |
| 205516_x_CIZ1      | 0.006896 | 0.005435 | 0.041724 |
| 205530_at ETFDH    | 0.011346 | 6.89E-06 | 0.000367 |
| 205557_at BPI      | 0.00955  | 0.00251  | 0.024597 |
| 205569_at LAMP3    | -0.00928 | 0.000355 | 0.00593  |
| 205582_s_GGT5      | -0.00486 | 0.006728 | 0.048349 |
| 205588_s_FGFR1OP   | 0.005821 | 0.001653 | 0.018368 |
| 205592_at SLC4A1   | 0.02593  | 5.5E-12  | 1.23E-07 |
| 205597_at SLC44A4  | 0.009789 | 0.005659 | 0.042908 |
| 205609_at ANGPT1   | -0.00649 | 0.003581 | 0.031453 |
| 205614_x_MST1      | 0.00962  | 0.000162 | 0.003375 |
| 205624_at CPA3     | -0.02779 | 5.56E-09 | 6.19E-06 |
| 205625_s_CALB1     | 0.013179 | 0.000895 | 0.011593 |
| 205626_s_CALB1     | 0.009161 | 0.005573 | 0.042369 |
| 205637_s_SH3GL3    | -0.00574 | 0.006426 | 0.047024 |
| 205640_at ALDH3B1  | 0.011843 | 1.58E-05 | 0.000621 |
| 205642_at CEP110   | -0.00646 | 0.0003   | 0.005246 |
| 205653_at CTSG     | -0.02214 | 8.63E-11 | 8.3E-07  |
| 205657_at HAAO     | 0.009464 | 0.001697 | 0.018686 |
| 205659_at HDAC9    | -0.00861 | 0.001092 | 0.013535 |
| 205665_at TSPAN9   | 0.004586 | 0.004545 | 0.036922 |
| 205666_at FMO1     | 0.012186 | 0.002077 | 0.0215   |
| 205668_at LY75     | -0.00773 | 0.003272 | 0.02965  |
| 205671_s_HLA-DOB   | -0.00884 | 0.000675 | 0.009482 |
| 205673_s_ASXB9     | 0.0122   | 0.000101 | 0.002397 |
| 205675_at MTPP     | 0.020894 | 1.48E-05 | 0.000603 |
| 205676_at CYP27B1  | 0.017646 | 0.000279 | 0.004969 |
| 205681_at BCL2A1   | -0.01106 | 0.00024  | 0.004447 |

|                   |          |          |          |
|-------------------|----------|----------|----------|
| 205682_x_APOM     | 0.019931 | 2.72E-05 | 0.000921 |
| 205683_x_TPSAB1   | -0.01544 | 4.81E-06 | 0.000287 |
| 205685_at_CD86    | -0.00679 | 0.0006   | 0.008667 |
| 205686_s_CD86     | -0.00952 | 0.000179 | 0.003612 |
| 205689_at_PCNXL2  | -0.00464 | 0.004309 | 0.035662 |
| 205710_at_LRP2    | 0.012106 | 0.000642 | 0.009122 |
| 205712_at_PTPRD   | 0.016085 | 9.42E-08 | 2.68E-05 |
| 205713_s_COMP     | -0.00964 | 6.76E-05 | 0.001785 |
| 205715_at_BST1    | 0.007291 | 0.000534 | 0.008003 |
| 205719_s_PAH      | 0.014305 | 0.000925 | 0.011936 |
| 205730_s_ABLIM3   | 0.011986 | 0.000113 | 0.0026   |
| 205735_s_AFF3     | -0.00435 | 0.006811 | 0.048714 |
| 205750_at_BPHL    | 0.013913 | 8.49E-07 | 9.74E-05 |
| 205751_at_SH3GL2  | 0.008981 | 0.005564 | 0.042361 |
| 205752_s_GSTM5    | -0.01052 | 3.08E-05 | 0.000997 |
| 205757_at_ENTPD5  | 0.019072 | 1.58E-08 | 1.03E-05 |
| 205758_at_CD8A    | -0.00763 | 0.001416 | 0.016374 |
| 205760_s_OGG1     | 0.010201 | 9.2E-05  | 0.002234 |
| 205761_s_DUS4L    | 0.006936 | 0.006663 | 0.048085 |
| 205765_at_CYP3A5  | 0.010984 | 0.002367 | 0.02359  |
| 205768_s_SLC27A2  | 0.01598  | 1.13E-05 | 0.000504 |
| 205769_at_SLC27A2 | 0.015958 | 1.91E-05 | 0.000707 |
| 205782_at_FGF7    | -0.01185 | 0.000697 | 0.009705 |
| 205786_s_ITGAM    | -0.01107 | 0.000895 | 0.011593 |
| 205789_at_CD1D    | -0.00799 | 0.001057 | 0.01319  |
| 205796_at_TCP11L1 | 0.010204 | 7.04E-05 | 0.001838 |
| 205798_at_IL7R    | -0.019   | 1.11E-06 | 0.000114 |
| 205799_s_SLC3A1   | 0.006208 | 0.00122  | 0.014714 |
| 205805_s_ROR1     | 0.006799 | 0.005274 | 0.040922 |
| 205821_at_KLRK1   | -0.00581 | 0.003095 | 0.028419 |
| 205823_at_RGS12   | 0.004251 | 0.003372 | 0.030154 |
| 205826_at_MYOM2   | 0.013829 | 1.17E-05 | 0.000517 |
| 205831_at_CD2     | -0.00796 | 0.000252 | 0.004621 |
| 205832_at_CPA4    | -0.00646 | 0.002875 | 0.02717  |
| 205834_s_PART1    | -0.0061  | 0.002052 | 0.021323 |
| 205843_x_CRAT     | 0.00546  | 0.005702 | 0.043091 |
| 205844_at_VNN1    | 0.016976 | 5.59E-05 | 0.001569 |
| 205852_at_CDK5R2  | -0.00491 | 0.002982 | 0.027702 |
| 205857_at_SLC18A2 | 0.006086 | 0.006953 | 0.049438 |
| 205859_at_LY86    | -0.01151 | 5.54E-06 | 0.000321 |
| 205860_x_FOLH1    | 0.024948 | 1.18E-07 | 2.91E-05 |
| 205882_x_ADD3     | 0.006707 | 0.000728 | 0.010035 |
| 205884_at_ITGA4   | -0.00715 | 0.00266  | 0.025671 |
| 205890_s_GABBR1   | -0.01131 | 9.6E-05  | 0.002305 |
| 205892_s_FABP1    | 0.030918 | 2.2E-07  | 4.05E-05 |
| 205894_at_ARSE    | 0.020254 | 6.57E-05 | 0.001745 |
| 205896_at_SLC22A4 | 0.016633 | 1.33E-07 | 3.14E-05 |
| 205898_at_CX3CR1  | -0.0119  | 1E-06    | 0.000108 |
| 205907_s_OMD      | -0.00621 | 0.002576 | 0.025117 |
| 205911_at_PTH1R   | 0.01076  | 8.19E-05 | 0.00205  |
| 205922_at_VNN2    | -0.00756 | 0.001106 | 0.013682 |
| 205934_at_PLCL1   | 0.008809 | 0.002053 | 0.021325 |
| 205939_at_CYP3A7  | 0.016281 | 2.77E-05 | 0.000931 |

|                   |          |          |          |
|-------------------|----------|----------|----------|
| 205942_s_ACSM3    | 0.008752 | 0.001989 | 0.020969 |
| 205945_at IL6R    | 0.007903 | 0.002126 | 0.021839 |
| 205950_s_CA1      | -0.00566 | 0.003326 | 0.029996 |
| 205960_at PDK4    | 0.011664 | 0.003685 | 0.032116 |
| 205963_s_DNAJA3   | 0.00681  | 0.000499 | 0.007609 |
| 205978_at KL      | 0.014704 | 0.000299 | 0.005239 |
| 205983_at DPEP1   | 0.019266 | 6.43E-08 | 2.33E-05 |
| 205985_x_CLCNKB   | 0.009882 | 0.002368 | 0.02359  |
| 205987_at CD1C    | -0.01679 | 3.04E-05 | 0.00099  |
| 205988_at CD84    | -0.00655 | 0.001531 | 0.017422 |
| 205991_s_PRRX1    | -0.01275 | 4.45E-06 | 0.000277 |
| 205996_s_AK2      | 0.00843  | 2.7E-05  | 0.000916 |
| 205999_x_CYP3A4   | 0.010423 | 0.000115 | 0.002625 |
| 206011_at CASP1   | -0.01161 | 0.000335 | 0.005701 |
| 206022_at NDP     | -0.00629 | 0.004689 | 0.037737 |
| 206023_at NMU     | -0.00788 | 0.000486 | 0.007463 |
| 206024_at HPD     | 0.028928 | 6.63E-06 | 0.000358 |
| 206030_at ASPA    | 0.015711 | 4.25E-06 | 0.000269 |
| 206054_at KNG1    | 0.012378 | 0.001057 | 0.01319  |
| 206058_at SLC6A12 | 0.01293  | 1.27E-05 | 0.000544 |
| 206065_s_DPYS     | 0.01866  | 1.91E-05 | 0.000707 |
| 206068_s_ACADL    | 0.009227 | 0.000174 | 0.003552 |
| 206069_s_ACADL    | 0.011034 | 0.000152 | 0.003234 |
| 206085_s_CTH      | 0.008277 | 0.000582 | 0.008494 |
| 206089_at NELL1   | 0.013207 | 7.35E-05 | 0.001906 |
| 206094_x_UGT1A1   | 0.014464 | 2.57E-05 | 0.00088  |
| 206100_at CPM     | 0.009119 | 0.000462 | 0.007215 |
| 206102_at GINS1   | -0.00657 | 0.000175 | 0.003557 |
| 206118_at STAT4   | -0.00827 | 0.001947 | 0.020629 |
| 206119_at BHMT    | 0.017309 | 6.29E-06 | 0.000348 |
| 206121_at AMPD1   | -0.00847 | 0.003347 | 0.030088 |
| 206129_s_ARSB     | 0.014367 | 5.89E-06 | 0.000332 |
| 206133_at XAF1    | -0.00802 | 0.002481 | 0.024422 |
| 206134_at ADAMDEC | -0.00796 | 0.001929 | 0.02048  |
| 206136_at FZD5    | 0.004556 | 0.006933 | 0.049319 |
| 206150_at CD27    | -0.00667 | 0.00069  | 0.009627 |
| 206155_at ABCC2   | 0.022134 | 1.42E-07 | 3.26E-05 |
| 206170_at ADRB2   | -0.00838 | 8.96E-05 | 0.0022   |
| 206171_at ADORA3  | -0.00535 | 6.38E-03 | 0.046799 |
| 206179_s_TPPP     | 0.007673 | 0.004403 | 0.036135 |
| 206181_at SLAMF1  | -0.00621 | 0.002279 | 0.022951 |
| 206206_at CD180   | -0.0044  | 0.007048 | 0.049812 |
| 206207_at CLC     | -0.00576 | 0.004224 | 0.035217 |
| 206214_at PLA2G7  | -0.01019 | 0.00305  | 0.028158 |
| 206217_at EDA     | 0.00762  | 7.66E-05 | 0.001959 |
| 206219_s_VAV1     | -0.00802 | 7.79E-05 | 0.001986 |
| 206221_at RASA3   | -0.00488 | 0.002564 | 0.025039 |
| 206226_at HRG     | 0.015866 | 1.2E-05  | 0.000526 |
| 206237_s_NRG1     | 0.010313 | 3.71E-05 | 0.001148 |
| 206239_s_SPINK1   | 0.021956 | 1.76E-05 | 0.000667 |
| 206242_at TM4SF5  | 0.010185 | 8E-07    | 9.28E-05 |
| 206248_at PRKCE   | 0.010983 | 0.000793 | 0.010694 |
| 206249_at MAP3K13 | 0.009243 | 2.79E-05 | 0.000935 |

|                    |          |          |          |
|--------------------|----------|----------|----------|
| 206253_at DLG2     | 0.00804  | 0.000108 | 0.002505 |
| 206254_at EGF      | 0.027481 | 3.37E-08 | 1.6E-05  |
| 206255_at BLK      | -0.00461 | 0.004197 | 0.035058 |
| 206259_at PROC     | 0.01492  | 1.97E-06 | 0.000162 |
| 206263_at FMO4     | 0.011277 | 0.000272 | 0.004887 |
| 206275_s_MICAL2    | -0.00529 | 0.006204 | 0.045781 |
| 206296_x_MAP4K1    | -0.01282 | 4.22E-06 | 0.000268 |
| 206298_at ARHGAP2  | -0.00581 | 0.0055   | 0.042017 |
| 206325_at SERPINA6 | 0.02308  | 7.28E-08 | 2.53E-05 |
| 206332_s_IFI16     | -0.01607 | 1.34E-07 | 3.14E-05 |
| 206334_at LIPF     | -0.0051  | 3.89E-03 | 0.033326 |
| 206337_at CCR7     | -0.00812 | 0.000489 | 0.007498 |
| 206341_at IL2RA    | -0.00556 | 0.00595  | 0.04454  |
| 206346_at PRLR     | 0.017227 | 1.31E-05 | 0.000554 |
| 206348_s_PDK3      | 0.008384 | 0.002515 | 0.024634 |
| 206350_at APCS     | -0.00559 | 0.001569 | 0.017654 |
| 206356_s_GNAL      | 0.005687 | 0.001999 | 0.021044 |
| 206363_at MAF      | 0.012926 | 6.67E-05 | 0.001769 |
| 206366_x_XCL1      | -0.01212 | 2.05E-06 | 0.000166 |
| 206369_s_PIK3CG    | -0.00967 | 0.000104 | 0.002431 |
| 206383_s_G3BP2     | 0.005413 | 0.001682 | 0.018559 |
| 206391_at RARRES1  | -0.01009 | 0.003173 | 0.028921 |
| 206396_at SLC1A1   | 0.014105 | 4.35E-06 | 0.000272 |
| 206401_s_MAPT      | 0.016938 | 1.78E-06 | 0.000154 |
| 206406_at SMCP     | -0.00545 | 0.003293 | 0.029772 |
| 206407_s_CCL13     | -0.00868 | 0.000278 | 0.00496  |
| 206420_at IGSF6    | -0.01582 | 8.99E-06 | 0.000437 |
| 206424_at CYP26A1  | -0.00331 | 0.005569 | 0.042367 |
| 206431_x_TBC1D9B   | 0.004609 | 0.001915 | 0.020367 |
| 206440_at LIN7A    | 0.007431 | 0.000608 | 0.00875  |
| 206449_s_MASP1     | 0.009215 | 2.4E-05  | 0.000834 |
| 206457_s_DIO1      | 0.021776 | 7.85E-06 | 0.000397 |
| 206460_at AJAP1    | 0.009223 | 0.000207 | 0.004009 |
| 206461_x_MT1H      | 0.008883 | 0.004672 | 0.037666 |
| 206469_x_AKR7A3    | 0.017564 | 2.82E-06 | 0.000202 |
| 206483_at LRRC6    | 0.005745 | 0.000102 | 0.002413 |
| 206484_s_XPNPEP2   | 0.031599 | 1.54E-09 | 2.85E-06 |
| 206488_s_CD36      | -0.0099  | 0.00339  | 0.03028  |
| 206492_at FHIT     | 0.013195 | 3.85E-07 | 5.93E-05 |
| 206500_s_C14orf106 | -0.01049 | 6.38E-05 | 0.001713 |
| 206513_at AIM2     | -0.01156 | 0.000971 | 0.012347 |
| 206514_s_CYP4F2    | 0.026398 | 2.41E-08 | 1.37E-05 |
| 206515_at CYP4F3   | 0.017294 | 4.36E-05 | 0.001303 |
| 206519_x_SIGLEC6   | -0.00658 | 0.000313 | 0.005401 |
| 206520_x_SIGLEC6   | -0.00661 | 0.000442 | 0.006976 |
| 206522_at MGAM     | 0.018654 | 1.86E-06 | 0.000157 |
| 206527_at ABAT     | 0.02178  | 8.6E-08  | 2.63E-05 |
| 206534_at GRIN2A   | -0.00661 | 0.005318 | 0.041157 |
| 206535_at SLC2A2   | 0.018467 | 6.81E-05 | 0.001796 |
| 206540_at GLB1L    | 0.013976 | 0.000612 | 0.008788 |
| 206541_at KLKB1    | 0.009339 | 1.83E-06 | 0.000157 |
| 206542_s_SMARCA2   | -0.00456 | 0.0003   | 0.005246 |
| 206545_at CD28     | -0.01218 | 1.64E-06 | 0.000146 |

|                   |          |          |          |
|-------------------|----------|----------|----------|
| 206560_s_MIA      | -0.00621 | 0.000352 | 0.005906 |
| 206572_x_ZNF85    | -0.00801 | 0.0001   | 0.002383 |
| 206576_s_CEACAM1  | 0.012284 | 0.000349 | 0.005875 |
| 206584_at_LY96    | -0.01935 | 1.3E-06  | 0.000126 |
| 206595_at_CST6    | -0.00648 | 0.005437 | 0.041724 |
| 206599_at_SLC16A5 | -0.00508 | 0.002806 | 0.026688 |
| 206600_s_SLC16A5  | -0.00949 | 6.41E-05 | 0.00172  |
| 206610_s_F11      | 0.013333 | 1.38E-06 | 0.000131 |
| 206628_at_SLC5A1  | 0.011929 | 0.00394  | 0.03354  |
| 206637_at_P2RY14  | -0.01024 | 0.001369 | 0.015989 |
| 206665_s_BCL2L1   | 0.008388 | 0.001964 | 0.020746 |
| 206666_at_GZMK    | -0.01487 | 9.31E-06 | 0.000441 |
| 206682_at_CLEC10A | -0.00745 | 0.000165 | 0.003414 |
| 206686_at_PDK1    | -0.00842 | 0.00442  | 0.036191 |
| 206693_at_IL7     | -0.00747 | 0.000633 | 0.009009 |
| 206695_x_ZNF43    | -0.00674 | 2.35E-05 | 0.000823 |
| 206702_at_TEK     | 0.007599 | 0.003367 | 0.030151 |
| 206704_at_CLCN5   | 0.008437 | 0.000312 | 0.005393 |
| 206707_x_FAM65B   | -0.00741 | 0.000868 | 0.011391 |
| 206710_s_EPB41L3  | 0.009142 | 0.001248 | 0.014954 |
| 206715_at_TFEC    | 0.009868 | 0.003561 | 0.031314 |
| 206716_at_UMOD    | 0.031837 | 1.13E-07 | 2.82E-05 |
| 206726_at_HPGDS   | -0.01801 | 1.25E-07 | 3.02E-05 |
| 206730_at_GRIA3   | 0.010864 | 6.88E-05 | 0.001807 |
| 206748_s_SPAG9    | 0.01098  | 2.99E-06 | 0.000209 |
| 206749_at_CD1B    | -0.00516 | 0.002002 | 0.021049 |
| 206754_s_CYP2B6   | 0.020705 | 1.51E-06 | 0.000138 |
| 206755_at_CYP2B6  | 0.021554 | 3.19E-06 | 0.000218 |
| 206756_at_CHST7   | -0.00737 | 0.000412 | 0.00663  |
| 206761_at_CD96    | -0.00557 | 0.000792 | 0.01069  |
| 206775_at_CUBN    | 0.026884 | 1.02E-07 | 2.73E-05 |
| 206788_s_CFBF     | -0.00605 | 0.00104  | 0.013049 |
| 206804_at_CD3G    | -0.01157 | 3.69E-05 | 0.001142 |
| 206805_at_SEMA3A  | -0.0074  | 0.001379 | 0.016061 |
| 206809_s_HNRNPA3  | -0.00439 | 2.05E-06 | 0.000166 |
| 206818_s_CNNM2    | 0.007717 | 0.001005 | 0.012683 |
| 206829_x_ZNF430   | -0.00503 | 0.00135  | 0.015851 |
| 206834_at_HBD     | -0.00758 | 0.001321 | 0.0156   |
| 206837_at_ALX1    | -0.01158 | 1.96E-05 | 0.000719 |
| 206840_at_AFM     | 0.028103 | 8.85E-08 | 2.63E-05 |
| 206846_s_HDAC6    | 0.013943 | 1.47E-06 | 0.000137 |
| 206856_at_LILRB5  | -0.00521 | 0.003329 | 0.029996 |
| 206864_s_HRK      | -0.00492 | 0.002733 | 0.026206 |
| 206870_at_PPARA   | 0.013068 | 3.28E-05 | 0.001046 |
| 206872_at_SLC17A1 | 0.016796 | 2.98E-05 | 0.000975 |
| 206878_at_DAO     | 0.026884 | 8.63E-09 | 7.12E-06 |
| 206900_x_ZNF253   | -0.00384 | 0.004027 | 0.034083 |
| 206904_at_MATN1   | -0.00381 | 0.004334 | 0.03581  |
| 206910_x_CFHR2    | -0.00617 | 0.000296 | 0.005189 |
| 206914_at_CRTAM   | -0.00568 | 0.00479  | 0.038315 |
| 206925_at_ST8SIA4 | -0.00949 | 0.000267 | 0.004821 |
| 206929_s_NFIC     | 0.008576 | 0.003359 | 0.030132 |
| 206930_at_GLYAT   | 0.014639 | 6.13E-05 | 0.001662 |

|                   |           |          |          |
|-------------------|-----------|----------|----------|
| 206932_at CH25H   | -0.00688  | 0.002904 | 0.027299 |
| 206946_at HCN4    | -0.00747  | 0.000238 | 0.004438 |
| 206950_at SCN9A   | 0.010535  | 0.000143 | 0.003109 |
| 206952_at G6PC    | 0.022343  | 1.06E-05 | 0.000484 |
| 206955_at AQP7    | 0.015656  | 6.52E-06 | 0.000354 |
| 206957_at AGXT    | 0.013938  | 0.000263 | 0.004751 |
| 206963_s NAT8     | 0.020664  | 5.39E-05 | 0.00153  |
| 206964_at NAT8B   | 0.016032  | 2.98E-06 | 0.000209 |
| 206974_at CXCR6   | -0.00702  | 0.001827 | 0.019703 |
| 206978_at CCR2    | -0.01354  | 2.97E-06 | 0.000208 |
| 206983_at CCR6    | -0.00959  | 1.89E-05 | 0.000703 |
| 206991_s CCR5     | -0.01056  | 5.54E-05 | 0.00156  |
| 207005_s BCL2     | 0.007956  | 1.11E-05 | 0.000497 |
| 207007_at NR1I3   | 0.009597  | 0.001173 | 0.014251 |
| 207008_at CXCR2   | -0.00883  | 0.00125  | 0.014959 |
| 207009_at PHOX2B  | -0.00707  | 0.002611 | 0.02534  |
| 207014_at GABRA2  | 0.008192  | 7.41E-05 | 0.001918 |
| 207017_at RAB27B  | -0.0104   | 0.000144 | 0.003114 |
| 207018_s RAB27B   | -9.50E-03 | 0.000592 | 0.008589 |
| 207040_s ST13     | 0.006259  | 5.78E-05 | 0.00161  |
| 207044_at THRB    | 0.00785   | 3.9E-05  | 0.001192 |
| 207047_s CLCNKA   | 0.01268   | 3.46E-05 | 0.001084 |
| 207049_at SCN8A   | 0.007575  | 0.001713 | 0.018797 |
| 207050_at CACNA2D | 0.007909  | 6.28E-05 | 0.001697 |
| 207051_at SLC17A4 | 0.009066  | 0.005146 | 0.040227 |
| 207053_at SLC8A1  | 0.011375  | 0.000585 | 0.008521 |
| 207067_s HDC      | -1.03E-02 | 2.32E-06 | 0.000178 |
| 207071_s ACO1     | 0.010865  | 0.000184 | 0.003687 |
| 207072_at IL18RAP | -0.00681  | 0.000338 | 0.005729 |
| 207075_at NLRP3   | -0.00918  | 3E-05    | 0.000979 |
| 207076_s ASS1     | 0.017959  | 1.62E-07 | 3.4E-05  |
| 207081_s PI4KA    | 0.009513  | 7.82E-05 | 0.001988 |
| 207085_x CSF2RA   | -0.00627  | 6.01E-05 | 0.00164  |
| 207095_at SLC10A2 | 0.017493  | 0.000106 | 0.002464 |
| 207126_x UGT1A1   | 0.013459  | 2.49E-05 | 0.000862 |
| 207131_x GGT1     | 0.010382  | 0.00052  | 0.007857 |
| 207132_x PFDN5    | -0.0091   | 0.001534 | 0.017431 |
| 207134_x TPSB2    | -0.01343  | 2.83E-05 | 0.000944 |
| 207141_s KCNJ3    | 0.00971   | 9.93E-05 | 0.002372 |
| 207142_at KCNJ3   | 0.00795   | 0.004139 | 0.034705 |
| 207173_x CDH11    | -0.00994  | 0.005217 | 0.04062  |
| 207184_at SLC6A13 | 0.012263  | 9.17E-06 | 0.000438 |
| 207191_s ISLR     | -7.41E-03 | 0.005284 | 0.040958 |
| 207201_s SLC22A1  | 0.005258  | 0.001977 | 0.020859 |
| 207205_at CEACAM4 | -0.0036   | 0.001641 | 0.018279 |
| 207211_at USP2    | 0.01995   | 7.71E-07 | 9.19E-05 |
| 207212_at SLC9A3  | 0.010809  | 2.12E-06 | 0.000168 |
| 207213_s USP2     | 0.031116  | 6.64E-09 | 6.19E-06 |
| 207216_at TNFSF8  | -0.00599  | 0.004337 | 0.035827 |
| 207237_at KCNA3   | -0.00806  | 0.000736 | 0.010106 |
| 207238_s PTPRC    | -0.01807  | 5.05E-05 | 0.001466 |
| 207243_s CALM2    | -0.00274  | 0.000998 | 0.012601 |
| 207253_s UBN1     | 0.003512  | 0.001747 | 0.019119 |

|                    |          |          |          |
|--------------------|----------|----------|----------|
| 207275_s_ACSL1     | 0.014918 | 3.64E-07 | 5.71E-05 |
| 207277_at_CD209    | -0.01563 | 2.02E-06 | 0.000164 |
| 207279_s_NEBL      | 0.006758 | 0.003436 | 0.030564 |
| 207291_at_PRRG4    | 0.008739 | 0.001573 | 0.01769  |
| 207315_at_CD226    | -0.00778 | 0.000708 | 0.009802 |
| 207320_x_STAU1     | 0.007388 | 1.84E-05 | 0.000688 |
| 207332_s_TFRC      | 0.008847 | 0.006447 | 0.047123 |
| 207339_s_LTB       | -0.01473 | 7.41E-08 | 2.54E-05 |
| 207362_at_SLC30A4  | 0.008999 | 0.000577 | 0.008442 |
| 207378_at_TREH     | 0.009837 | 4.98E-06 | 0.000295 |
| 207385_at_TFDP3    | -0.00593 | 0.001802 | 0.019536 |
| 207387_s_GK        | 0.013004 | 1.73E-05 | 0.000658 |
| 207399_at_BFSP2    | -0.00505 | 0.000214 | 0.004112 |
| 207400_at_NPY5R    | -0.00661 | 0.005634 | 0.042731 |
| 207407_x_CYP4A11   | 0.020374 | 1.13E-07 | 2.82E-05 |
| 207416_s_NFATC3    | 0.004493 | 0.001953 | 0.020654 |
| 207429_at_SLC22A2  | 0.010031 | 0.000223 | 0.004239 |
| 207444_at_SLC22A13 | 0.017958 | 1.16E-08 | 8.12E-06 |
| 207446_at_TLR6     | -0.00528 | 0.001474 | 0.016944 |
| 207456_at_HNF4G    | 0.0102   | 0.00029  | 0.005116 |
| 207496_at_MS4A2    | -0.00687 | 0.001014 | 0.012751 |
| 207497_s_MS4A2     | -0.01264 | 3.89E-07 | 5.93E-05 |
| 207505_at_PRKG2    | -0.00669 | 0.000496 | 0.007571 |
| 207509_s_LAIR2     | -0.01279 | 0.000164 | 0.003397 |
| 207522_s_ATP2A3    | -0.00628 | 0.001098 | 0.013595 |
| 207524_at_ST7      | 0.007965 | 0.000948 | 0.012149 |
| 207542_s_AQP1      | 0.015436 | 6.84E-05 | 0.001799 |
| 207543_s_P4HA1     | 0.005176 | 0.006555 | 0.04758  |
| 207544_s_ADH6      | 0.019642 | 2.38E-06 | 0.000181 |
| 207560_at_SLC28A1  | 0.010156 | 0.000193 | 0.003803 |
| 207567_at_SLC13A2  | 0.015481 | 1.27E-06 | 0.000124 |
| 207594_s_SYNJ1     | 0.009329 | 2.53E-06 | 0.000188 |
| 207596_at          | 0.008924 | 0.001409 | 0.016317 |
| 207613_s_CAMK2A    | 0.006534 | 0.000463 | 0.007219 |
| 207651_at_GPR171   | -0.01585 | 5.22E-06 | 0.000306 |
| 207655_s_BLNK      | -0.01089 | 5.82E-06 | 0.000331 |
| 207673_at_NPHS1    | 0.010426 | 0.003508 | 0.030983 |
| 207677_s_NCF4      | -0.00929 | 8.51E-05 | 0.002115 |
| 207685_at_CRYBB3   | 0.006258 | 0.004262 | 0.035398 |
| 207697_x_LILRB2    | -0.00636 | 0.00179  | 0.019443 |
| 207705_s_NINL      | 0.009275 | 9.28E-05 | 0.002249 |
| 207707_s_SEC13     | 0.00635  | 6.55E-05 | 0.001741 |
| 207709_at_PRKAA2   | 0.004596 | 0.005128 | 0.040102 |
| 207741_x_TPSAB1    | -0.01379 | 0.000191 | 0.003792 |
| 207754_at_RASSF8   | 0.007197 | 0.003117 | 0.0286   |
| 207761_s_METTL7A   | 0.006601 | 6.26E-05 | 0.001696 |
| 207764_s_HIPK3     | 0.006756 | 0.000202 | 0.003947 |
| 207766_at_CDKL1    | 0.011904 | 1.64E-05 | 0.000633 |
| 207771_at_SLC5A2   | 0.014284 | 1.58E-05 | 0.000621 |
| 207776_s_CACNB2    | 0.010524 | 0.000765 | 0.010424 |
| 207777_s_SP140     | -0.00757 | 0.002304 | 0.023152 |
| 207795_s_KLRD1     | -0.00487 | 0.005379 | 0.041459 |
| 207828_s_CENPF     | -0.007   | 0.002032 | 0.021215 |



|                   |          |          |          |
|-------------------|----------|----------|----------|
| 207840_at CD160   | -0.00768 | 0.000194 | 0.003825 |
| 207843_x_CYB5A    | 0.008081 | 8.9E-05  | 0.00219  |
| 207851_s_INSR     | 0.013868 | 0.000113 | 0.0026   |
| 207857_at LILRA2  | -0.00682 | 0.002413 | 0.023914 |
| 207858_s_PKLR     | 0.024236 | 1.56E-07 | 3.38E-05 |
| 207871_s_ST7      | 0.006631 | 0.000182 | 0.003654 |
| 207886_s_CALCR    | 0.006832 | 0.002242 | 0.022671 |
| 207892_at CD40LG  | -0.00651 | 0.003612 | 0.031606 |
| 207894_s_TCL6     | 0.008488 | 0.002019 | 0.021153 |
| 207922_s_MAEA     | 0.005905 | 0.004903 | 0.038995 |
| 207943_x_PLAGL1   | -0.00521 | 0.00683  | 0.04878  |
| 207945_s_CSNK1D   | 0.005705 | 0.003731 | 0.032427 |
| 207950_s_ANK3     | 0.007311 | 0.000366 | 0.006065 |
| 207957_s_PRKCB    | -0.01242 | 6E-05    | 0.00164  |
| 207973_x_ACRV1    | -0.00709 | 0.006016 | 0.044883 |
| 207981_s_ESRRG    | 0.008873 | 0.000398 | 0.006454 |
| 207998_s_CACNA1D  | 0.005828 | 0.002576 | 0.025117 |
| 208002_s_ACOT7    | 0.012371 | 1.41E-05 | 0.000584 |
| 208006_at FOXI1   | 0.008975 | 0.000137 | 0.003005 |
| 208010_s_PTPN22   | -0.00786 | 0.000784 | 0.010637 |
| 208012_x_SP110    | -0.00839 | 0.000109 | 0.002525 |
| 208018_s_HCK      | -0.00823 | 4.56E-06 | 0.000281 |
| 208030_s_ADD1     | 0.00345  | 0.006226 | 0.045883 |
| 208032_s_GRIA3    | 0.007733 | 0.000299 | 0.005239 |
| 208034_s_PROZ     | 0.020504 | 1.9E-05  | 0.000705 |
| 208056_s_CBFA2T3  | -0.00582 | 0.00421  | 0.035126 |
| 208057_s_GLI2     | -0.00475 | 0.003895 | 0.033332 |
| 208068_x_CSH1     | -0.00642 | 0.000204 | 0.003974 |
| 208070_s_REV3L    | 0.007513 | 0.006188 | 0.045707 |
| 208086_s_DMD      | 0.00645  | 0.001733 | 0.018982 |
| 208091_s_VOPP1    | -0.00661 | 0.004759 | 0.038166 |
| 208092_s_FAM49A   | -0.00921 | 0.000486 | 0.007463 |
| 208094_s_CCDC130  | -0.00489 | 0.004888 | 0.038931 |
| 208113_x_PABPC3   | -0.00333 | 0.000255 | 0.004663 |
| 208140_s_LRRC48   | 0.009233 | 2.36E-05 | 0.000827 |
| 208177_at SLC34A1 | 0.030647 | 5.47E-10 | 1.73E-06 |
| 208184_s_TRAPPC10 | 0.006313 | 0.001514 | 0.017295 |
| 208206_s_RASGRP2  | -0.00444 | 0.005521 | 0.042118 |
| 208218_s_ACVR1B   | 0.006867 | 0.005375 | 0.04145  |
| 208228_s_FGFR2    | 0.008258 | 5.42E-05 | 0.001533 |
| 208230_s_NRG1     | 0.007926 | 5.12E-05 | 0.001472 |
| 208234_x_FGFR2    | 0.008503 | 0.001108 | 0.013693 |
| 208240_s_FGF1     | 0.014642 | 0.000993 | 0.012558 |
| 208252_s_CHST3    | 0.006752 | 2.74E-05 | 0.000926 |
| 208283_at GAGE1   | -0.00623 | 0.006076 | 0.045177 |
| 208284_x_GGT1     | 0.012204 | 5.85E-05 | 0.001614 |
| 208296_x_TNFAIP8  | -0.01072 | 1.29E-05 | 0.000549 |
| 208298_at EVI5    | -0.00486 | 0.006012 | 0.044868 |
| 208318_s_XYLB     | 0.022001 | 9.18E-08 | 2.66E-05 |
| 208321_s_CABP1    | 5.92E-03 | 0.004988 | 0.039376 |
| 208322_s_ST3GAL1  | 0.012559 | 1.1E-05  | 0.000497 |
| 208323_s_ANXA13   | 0.012515 | 0.003035 | 0.028067 |
| 208335_s_DARC     | -0.00977 | 5.19E-05 | 0.001485 |

|                    |          |          |          |
|--------------------|----------|----------|----------|
| 208336_s_TECR      | 0.008602 | 0.003793 | 0.032788 |
| 208354_s_SLC12A3   | 0.024316 | 1.02E-06 | 0.000108 |
| 208369_s_GCDH      | 0.013032 | 1.6E-05  | 0.000624 |
| 208373_s_P2RY6     | -0.00499 | 0.0036   | 0.031533 |
| 208374_s_CAPZA1    | -0.00563 | 0.003371 | 0.030154 |
| 208376_at_CCR4     | -0.00541 | 0.000979 | 0.01243  |
| 208383_s_PCK1      | 0.011634 | 0.002716 | 0.026093 |
| 208396_s_PDE1A     | -0.008   | 0.003717 | 0.032341 |
| 208406_s_GRAP2     | -0.0042  | 0.005916 | 0.044329 |
| 208420_x_SUPT6H    | 0.007864 | 0.000295 | 0.005179 |
| 208423_s_MSR1      | -0.01358 | 2.24E-05 | 0.000794 |
| 208429_x_HNF4A     | 0.017267 | 9.51E-06 | 0.000445 |
| 208434_at_MECOM    | -0.00506 | 0.001401 | 0.01628  |
| 208436_s_IRF7      | -0.00667 | 0.000841 | 0.011149 |
| 208438_s_FGR       | -0.00806 | 0.000221 | 0.004219 |
| 208446_s_ZFYVE9    | 0.007301 | 0.000928 | 0.011957 |
| 208449_s_FGF8      | -0.00451 | 0.003497 | 0.030956 |
| 208451_s_C4A       | 0.018701 | 1.37E-05 | 0.000572 |
| 208456_s_RRAS2     | 0.005289 | 0.003719 | 0.032341 |
| 208539_x_SPRR2B    | -0.00504 | 0.000172 | 0.003513 |
| 208540_x_S100A11   | -0.00505 | 0.004172 | 0.034886 |
| 208549_x_PTMA      | -0.00323 | 0.004962 | 0.03924  |
| 208561_at_ABCC9    | -0.01181 | 0.002812 | 0.026714 |
| 208569_at_HIST1H2A | -0.00589 | 0.006552 | 0.047574 |
| 208576_s_HIST1H3B  | -0.00655 | 0.001341 | 0.015779 |
| 208581_x_MT1X      | 0.011538 | 0.001538 | 0.017444 |
| 208594_x_LILRA6    | -0.00416 | 0.00623  | 0.045895 |
| 208596_s_UGT1A1    | 0.015524 | 6.67E-06 | 0.00036  |
| 208607_s_SAA1      | -0.0089  | 0.00087  | 0.011416 |
| 208608_s_SNTB1     | 0.007144 | 0.002151 | 0.022037 |
| 208616_s_PTP4A2    | -0.00287 | 0.005088 | 0.039976 |
| 208625_s_EIF4G1    | 0.006084 | 0.003468 | 0.030794 |
| 208630_at_HADHA    | 0.006175 | 0.001552 | 0.017522 |
| 208631_s_HADHA     | 0.008491 | 0.006002 | 0.044826 |
| 208636_at_ACTN1    | -0.01119 | 3.58E-05 | 0.001115 |
| 208650_s_CD24      | -0.00926 | 2.26E-05 | 0.000798 |
| 208651_x_CD24      | -0.00712 | 2.63E-05 | 0.000898 |
| 208653_s_CD164     | 0.005478 | 0.005081 | 0.039942 |
| 208655_at_CCNI     | -0.00294 | 0.000207 | 0.004017 |
| 208659_at_CLIC1    | -0.00615 | 0.00334  | 0.03006  |
| 208678_at_ATP6V1E1 | 0.00395  | 0.00091  | 0.011769 |
| 208687_x_HSPA8     | 0.004536 | 0.000146 | 0.003136 |
| 208690_s_PDLIM1    | -0.00996 | 0.000417 | 0.00668  |
| 208695_s_RPL39     | -0.00693 | 8.95E-05 | 0.0022   |
| 208704_x_APLP2     | 0.003188 | 0.002612 | 0.02534  |
| 208705_s_EIF5      | 0.006172 | 0.000125 | 0.002808 |
| 208707_at_EIF5     | 0.009943 | 4.64E-06 | 0.000284 |
| 208712_at_CCND1    | 0.007222 | 0.000584 | 0.008515 |
| 208713_at_HNRNPUL  | -0.00338 | 0.005633 | 0.042731 |
| 208715_at_TMCO1    | 0.005047 | 0.000802 | 0.010769 |
| 208738_x_LOC72882  | -0.00507 | 0.000421 | 0.006722 |
| 208739_x_SUMO2     | -0.00414 | 0.00123  | 0.014781 |
| 208740_at_SAP18    | 0.0035   | 0.004935 | 0.03909  |

|                    |          |          |          |
|--------------------|----------|----------|----------|
| 208741_at SAP18    | 0.006172 | 0.00382  | 0.032918 |
| 208747_s_C1S       | -0.01334 | 0.00023  | 0.004328 |
| 208754_s_NAP1L1    | -0.00736 | 0.000395 | 0.006428 |
| 208769_at EIF4EBP2 | 0.012293 | 0.000272 | 0.004889 |
| 208770_s EIF4EBP2  | 0.005383 | 2.74E-05 | 0.000925 |
| 208772_at ANKHD1   | 0.005981 | 0.000707 | 0.009801 |
| 208774_at CSNK1D   | 5.72E-03 | 0.00315  | 0.028761 |
| 208776_at PSMD11   | 0.009973 | 2.97E-06 | 0.000208 |
| 208788_at ELOVL5   | 0.006816 | 0.00364  | 0.03179  |
| 208804_s_SRSF6     | 0.005735 | 0.000269 | 0.004844 |
| 208808_s_HMGB2     | -0.00838 | 2.83E-05 | 0.000945 |
| 208810_at DNAJB6   | 0.005803 | 0.000396 | 0.006428 |
| 208813_at GOT1     | 0.010279 | 1.46E-06 | 0.000136 |
| 208816_x_ANXA2P2   | -0.00683 | 0.001547 | 0.017479 |
| 208830_s_SUPT6H    | 0.009035 | 3E-06    | 0.000209 |
| 208840_s_G3BP2     | 0.005326 | 0.001087 | 0.013486 |
| 208847_s_ADH5      | 0.004923 | 0.001532 | 0.017422 |
| 208850_s_THY1      | 0.016147 | 3.38E-05 | 0.001067 |
| 208851_s_THY1      | 0.019325 | 2.6E-07  | 4.57E-05 |
| 208853_s_CANX      | 0.004847 | 0.007066 | 0.04991  |
| 208868_s_GABARAP   | 0.006172 | 0.00022  | 0.004197 |
| 208885_at LCP1     | -0.01867 | 7.52E-08 | 2.54E-05 |
| 208894_at HLA-DRA  | -0.01327 | 0.004151 | 0.034747 |
| 208898_at ATP6V1D  | 0.005639 | 0.005307 | 0.041112 |
| 208899_x_ATP6V1D   | 0.004853 | 0.001855 | 0.019915 |
| 208914_at GGA2     | 0.010591 | 2.18E-05 | 0.000778 |
| 208948_s_STAU1     | 0.00754  | 0.000178 | 0.003599 |
| 208950_s_ALDH7A1   | 0.012372 | 1.3E-06  | 0.000126 |
| 208951_at ALDH7A1  | 0.0143   | 5.67E-06 | 0.000325 |
| 208965_s_IFI16     | -0.01633 | 2.44E-06 | 0.000184 |
| 208966_x_IFI16     | -0.01556 | 5.01E-06 | 0.000295 |
| 208978_at CRIP2    | -0.00851 | 1.21E-05 | 0.000527 |
| 208997_s_UCP2      | -0.0133  | 0.000436 | 0.006909 |
| 208998_at UCP2     | -0.01204 | 0.000239 | 0.004439 |
| 209007_s_C1orf63   | -0.00697 | 0.003519 | 0.031056 |
| 209017_s_LONP1     | 0.006525 | 0.006091 | 0.045231 |
| 209019_s_PINK1     | 0.007059 | 0.001434 | 0.016555 |
| 209034_at PNRC1    | -0.00443 | 0.000347 | 0.005852 |
| 209035_at MDK      | -0.00574 | 0.00235  | 0.023506 |
| 209036_s_MDH2      | 0.00513  | 0.002493 | 0.024503 |
| 209047_at AQP1     | 0.011833 | 0.000418 | 0.006695 |
| 209051_s_RALGDS    | -0.00627 | 0.000185 | 0.003692 |
| 209076_s_WDR45L    | 0.004247 | 0.00409  | 0.034355 |
| 209083_at CORO1A   | -0.01187 | 0.000145 | 0.003134 |
| 209092_s_GLOD4     | 0.003252 | 0.006872 | 0.04902  |
| 209094_at DDAH1    | 0.004485 | 0.00238  | 0.023666 |
| 209095_at DLD      | 0.005958 | 0.001115 | 0.013741 |
| 209112_at CDKN1B   | -0.00627 | 0.002317 | 0.023249 |
| 209116_x_HBB       | -0.02066 | 0.000114 | 0.002616 |
| 209118_s_TUBA1A    | -0.00928 | 0.0002   | 0.003914 |
| 209120_at NR2F2    | -0.00686 | 5.89E-07 | 7.81E-05 |
| 209122_at PLIN2    | 0.012013 | 7.61E-05 | 0.001951 |
| 209123_at QDPR     | 0.016055 | 1.89E-06 | 0.000158 |

|                    |          |          |          |
|--------------------|----------|----------|----------|
| 209129_at TRIP6    | 0.01065  | 0.000593 | 0.008594 |
| 209138_x_ IGL@     | -0.02141 | 0.002508 | 0.024589 |
| 209150_s_ TM9SF1   | 0.005159 | 0.002949 | 0.027523 |
| 209160_at AKR1C3   | 0.009342 | 0.000936 | 0.012034 |
| 209161_at PRPF4    | 0.007733 | 0.000464 | 0.007232 |
| 209164_s_ CYB561   | 0.008816 | 0.005448 | 0.041765 |
| 209167_at GPM6B    | -0.01187 | 0.001713 | 0.018797 |
| 209168_at GPM6B    | -0.01025 | 5.06E-05 | 0.001466 |
| 209169_at GPM6B    | -0.0083  | 0.000283 | 0.005014 |
| 209170_s_ GPM6B    | -0.0101  | 0.001815 | 0.019623 |
| 209172_s_ CENPF    | -0.00626 | 0.006638 | 0.047999 |
| 209173_at AGR2     | -0.02665 | 2.58E-07 | 4.57E-05 |
| 209180_at RABGGTB  | 0.004648 | 0.004947 | 0.039136 |
| 209200_at MEF2C    | -0.01094 | 0.000113 | 0.0026   |
| 209201_x_ CXCR4    | -0.01504 | 0.001535 | 0.017431 |
| 209213_at CBR1     | 0.004321 | 0.006697 | 0.048206 |
| 209220_at GPC3     | 0.011983 | 0.002398 | 0.023809 |
| 209222_s_ OSBPL2   | 0.005926 | 1.65E-05 | 0.000633 |
| 209234_at KIF1B    | 0.008022 | 7.55E-06 | 0.000389 |
| 209244_s_ KIF1C    | 0.007228 | 0.000161 | 0.003358 |
| 209249_s_ GHITM    | 0.006009 | 0.000621 | 0.008869 |
| 209254_at KLHDC10  | 0.004887 | 0.004525 | 0.0368   |
| 209256_s_ KLHDC10  | 0.009411 | 0.003799 | 0.032819 |
| 209288_s_ CDC42EP3 | -0.0056  | 0.006459 | 0.04718  |
| 209289_at NFIB     | 0.006111 | 0.001173 | 0.014251 |
| 209290_s_ NFIB     | 0.004139 | 0.003301 | 0.029816 |
| 209299_x_ PPIL2    | 0.004881 | 0.002331 | 0.023341 |
| 209301_at CA2      | 0.009143 | 0.001775 | 0.019353 |
| 209306_s_ SWAP70   | -0.00486 | 0.005437 | 0.041724 |
| 209309_at AZGP1    | 0.024444 | 1.72E-06 | 0.00015  |
| 209311_at BCL2L2   | 0.008299 | 0.000127 | 0.002832 |
| 209317_at POLR1C   | 0.003718 | 0.006983 | 0.049528 |
| 209324_s_ RGS16    | -0.01019 | 0.002015 | 0.021129 |
| 209334_s_ PSMD9    | 0.009034 | 0.001277 | 0.015225 |
| 209335_at DCN      | -0.01227 | 0.001843 | 0.01983  |
| 209340_at UAP1     | 0.0091   | 6.84E-05 | 0.001799 |
| 209341_s_ IKBKB    | -0.00576 | 0.003147 | 0.028761 |
| 209343_at EFHD1    | 0.005744 | 0.006737 | 0.048383 |
| 209348_s_ MAF      | 0.007693 | 0.003942 | 0.03354  |
| 209355_s_ PPAP2B   | 0.010734 | 0.001854 | 0.019915 |
| 209360_s_ RUNX1    | -0.00694 | 0.004297 | 0.035601 |
| 209366_x_ CYB5A    | 0.009818 | 1.43E-05 | 0.00059  |
| 209368_at EPHX2    | 0.016449 | 1.2E-06  | 0.000119 |
| 209371_s_ SH3BP2   | 0.015871 | 2.59E-06 | 0.00019  |
| 209373_at MALL     | 0.013204 | 0.000703 | 0.009767 |
| 209374_s_ IGHM     | -0.02602 | 6.6E-08  | 2.33E-05 |
| 209375_at XPC      | 0.005461 | 0.004908 | 0.038995 |
| 209385_s_ PROSC    | 0.007367 | 0.002675 | 0.025801 |
| 209390_at TSC1     | 0.005501 | 0.000677 | 0.009496 |
| 209392_at ENPP2    | 0.009418 | 0.004385 | 0.036073 |
| 209395_at CHI3L1   | 0.013703 | 0.000406 | 0.006551 |
| 209396_s_ CHI3L1   | 0.013609 | 1.48E-05 | 0.000603 |
| 209409_at GRB10    | 0.011465 | 2.53E-06 | 0.000188 |

|                    |          |          |          |
|--------------------|----------|----------|----------|
| 209410_s_GRB10     | 0.014459 | 2.04E-08 | 1.23E-05 |
| 209420_s_SMPD1     | 0.007957 | 0.000395 | 0.006428 |
| 209439_s_PHKA2     | 0.005894 | 0.000189 | 0.003754 |
| 209442_x_ANK3      | 0.007262 | 7.48E-05 | 0.00193  |
| 209443_at_SERPINA5 | 0.010926 | 0.000808 | 0.010807 |
| 209451_at_TANK     | -0.0077  | 0.001252 | 0.014976 |
| 209458_x_HBA1      | -0.01859 | 0.000744 | 0.010169 |
| 209459_s_ABAT      | 0.017263 | 1.16E-05 | 0.000512 |
| 209460_at_ABAT     | 0.020217 | 1.26E-07 | 3.02E-05 |
| 209465_x_PTN       | -0.01194 | 7.39E-05 | 0.001913 |
| 209468_at_LRP5     | 0.011592 | 7.61E-07 | 9.15E-05 |
| 209493_at_PDZD2    | 0.014164 | 1.48E-05 | 0.000603 |
| 209498_at_CEACAM1  | 0.009457 | 0.000403 | 0.006525 |
| 209503_s_PSMC5     | 0.005604 | 0.00111  | 0.013698 |
| 209514_s_RAB27A    | -0.00947 | 0.001221 | 0.014714 |
| 209515_s_RAB27A    | -0.00876 | 0.000319 | 0.005478 |
| 209522_s_CRAT      | 0.010365 | 0.000265 | 0.004791 |
| 209524_at_HDGFRP3  | -0.00521 | 0.006533 | 0.047497 |
| 209525_at_HDGFRP3  | -0.00758 | 0.00149  | 0.017071 |
| 209526_s_HDGFRP3   | -0.00573 | 0.005105 | 0.040028 |
| 209529_at_PPAP2C   | -0.005   | 0.006177 | 0.04564  |
| 209531_at_GSTZ1    | 0.006314 | 0.002253 | 0.022759 |
| 209539_at_ARHGEF6  | -0.01013 | 0.00162  | 0.018085 |
| 209550_at_NDN      | -0.00697 | 9.93E-05 | 0.002372 |
| 209563_x_CALM1     | 0.003406 | 0.002038 | 0.021263 |
| 209571_at_CIR1     | -0.00498 | 0.001765 | 0.019275 |
| 209572_s_EED       | -0.00499 | 0.001671 | 0.018492 |
| 209576_at_GNAI1    | -0.00862 | 0.001268 | 0.015139 |
| 209577_at_PCYT2    | 0.011347 | 4.43E-05 | 0.001318 |
| 209581_at_PLA2G16  | 0.009535 | 0.000118 | 0.002673 |
| 209590_at_BMP7     | 0.010964 | 0.003146 | 0.028761 |
| 209600_s_ACOX1     | 0.011119 | 6.44E-07 | 8.2E-05  |
| 209605_at_TST      | 0.009503 | 2.15E-05 | 0.000774 |
| 209606_at_CYTIP    | -0.01404 | 7.86E-06 | 0.000397 |
| 209608_s_ACAT2     | 0.006156 | 0.003538 | 0.031174 |
| 209612_s_ADH1B     | -0.01851 | 1.21E-05 | 0.000526 |
| 209613_s_ADH1B     | -0.02005 | 4.43E-05 | 0.001318 |
| 209614_at_ADH1B    | -0.01281 | 1.63E-05 | 0.00063  |
| 209618_at_CTNND2   | -0.00614 | 0.002941 | 0.027494 |
| 209620_s_ABCB7     | 0.004333 | 0.004018 | 0.034025 |
| 209623_at_MCCC2    | 0.008543 | 8.14E-05 | 0.002041 |
| 209624_s_MCCC2     | 0.009984 | 4.7E-06  | 0.000285 |
| 209645_s_ALDH1B1   | 0.011705 | 0.000122 | 0.002756 |
| 209657_s_HSF2      | -0.00566 | 0.003805 | 0.032837 |
| 209662_at_CETN3    | -0.00445 | 0.002944 | 0.027494 |
| 209663_s_ITGA7     | 0.009592 | 8.21E-05 | 0.002052 |
| 209667_at_CES2     | 0.011418 | 6.11E-06 | 0.000339 |
| 209668_x_CES2      | 0.018779 | 4.76E-06 | 0.000286 |
| 209670_at_TRAC     | -0.00887 | 2.49E-05 | 0.000862 |
| 209671_x_TRAC      | -0.01458 | 2.01E-06 | 0.000164 |
| 209683_at_FAM49A   | -0.00646 | 0.003741 | 0.032493 |
| 209685_s_PRKCB     | -0.01357 | 5.24E-06 | 0.000306 |
| 209686_at_S100B    | -0.01311 | 8.84E-08 | 2.63E-05 |

|                    |          |          |          |
|--------------------|----------|----------|----------|
| 209688_s_CCDC93    | 0.005114 | 0.006482 | 0.047279 |
| 209689_at_CCDC93   | 0.006816 | 0.002962 | 0.02756  |
| 209691_s_DOK4      | 5.76E-03 | 0.003288 | 0.02975  |
| 209696_at_FBP1     | 0.019654 | 1.48E-07 | 3.32E-05 |
| 209700_x_PDE4DIP   | -0.00689 | 0.005337 | 0.041253 |
| 209703_x_METTL7A   | 0.008622 | 9.17E-06 | 0.000438 |
| 209708_at_MOXD1    | -0.01969 | 1.1E-05  | 0.000497 |
| 209711_at_SLC35D1  | 0.011926 | 0.000425 | 0.006771 |
| 209712_at_SLC35D1  | 0.009932 | 0.001047 | 0.013099 |
| 209713_s_SLC35D1   | 0.004932 | 0.006462 | 0.047182 |
| 209722_s_SERPINB9  | -0.00538 | 0.005054 | 0.039794 |
| 209732_at_CLEC2B   | -0.01829 | 1.23E-06 | 0.000121 |
| 209734_at_NCKAP1L  | -0.00992 | 1.54E-05 | 0.000614 |
| 209736_at_SOX13    | 0.005878 | 0.004774 | 0.038243 |
| 209749_s_ACE       | 0.007763 | 5.4E-05  | 0.00153  |
| 209752_at_REG1A    | -0.01049 | 0.007078 | 0.049976 |
| 209757_s_MYCN      | 0.010874 | 0.000258 | 0.004693 |
| 209762_x_SP110     | -0.00884 | 0.000966 | 0.012303 |
| 209764_at_MGAT3    | 0.007819 | 0.000925 | 0.011936 |
| 209765_at_ADAM19   | -0.00524 | 0.003871 | 0.033216 |
| 209771_x_CD24      | -0.00808 | 1.61E-05 | 0.000627 |
| 209780_at_PHTF2    | -0.00735 | 0.005122 | 0.040095 |
| 209783_at_DBP      | 0.00531  | 0.002315 | 0.023242 |
| 209786_at_HMGN4    | -0.00589 | 0.001717 | 0.018838 |
| 209788_s_ERAP1     | -0.00633 | 0.004049 | 0.034142 |
| 209791_at_PADI2    | 0.008686 | 0.002593 | 0.02524  |
| 209795_at_CD69     | -0.02154 | 5.47E-07 | 7.47E-05 |
| 209806_at_HIST1H2B | -0.01091 | 0.001028 | 0.012913 |
| 209818_s_HABP4     | 0.006847 | 0.00094  | 0.01207  |
| 209821_at_IL33     | -0.00775 | 0.000946 | 0.012124 |
| 209825_s_UCK2      | 0.006593 | 0.000617 | 0.008834 |
| 209827_s_IL16      | -0.01368 | 4.17E-06 | 0.000266 |
| 209828_s_IL16      | -0.00743 | 0.001372 | 0.016003 |
| 209835_x_CD44      | -0.01348 | 0.000679 | 0.009499 |
| 209869_at_ADRA2A   | -0.01059 | 1.84E-05 | 0.000688 |
| 209874_x_CNNM2     | 0.007114 | 0.000111 | 0.002554 |
| 209879_at_SELPLG   | -0.00787 | 0.000193 | 0.003803 |
| 209881_s_LAT       | -0.00484 | 0.002795 | 0.026619 |
| 209882_at_RIT1     | 0.003962 | 0.005856 | 0.04399  |
| 209897_s_SLIT2     | 0.015884 | 4.05E-08 | 1.79E-05 |
| 209900_s_SLC16A1   | 0.00933  | 0.001371 | 0.016003 |
| 209904_at_TNNC1    | 0.008719 | 0.002648 | 0.025595 |
| 209906_at_C3AR1    | -0.01044 | 0.000366 | 0.006065 |
| 209911_x_HIST1H2B  | 0.006593 | 0.004636 | 0.037499 |
| 209916_at_DHTKD1   | 0.019351 | 3.73E-06 | 0.000245 |
| 209918_at_GGTLC2   | 0.00835  | 0.001711 | 0.018792 |
| 209919_x_GGT1      | 0.009898 | 0.000742 | 0.010162 |
| 209921_at_SLC7A11  | -0.00681 | 0.006897 | 0.049169 |
| 209928_s_MSC       | -0.00524 | 0.002457 | 0.024242 |
| 209933_s_CD300A    | -0.00685 | 0.004936 | 0.03909  |
| 209949_at_NCF2     | -0.01509 | 2.86E-05 | 0.000951 |
| 209961_s_HGF       | -0.01188 | 0.000962 | 0.012279 |
| 209964_s_ATXN7     | 0.006165 | 0.004074 | 0.034303 |

|                    |          |          |          |
|--------------------|----------|----------|----------|
| 209966_x_ESRRG     | 0.007443 | 0.001582 | 0.017767 |
| 209970_x_CASP1     | -0.01484 | 6.77E-07 | 8.54E-05 |
| 209977_at_PLG      | 0.038399 | 4.38E-10 | 1.62E-06 |
| 209978_s_LPA       | 0.040288 | 1.23E-09 | 2.5E-06  |
| 209980_s_SHMT1     | 0.014647 | 7.92E-06 | 0.000397 |
| 209987_s_ASCL1     | -0.00388 | 0.003886 | 0.033312 |
| 209993_at_ABCB1    | 0.012201 | 8.11E-05 | 0.002035 |
| 209994_s_ABCB1     | 0.010696 | 0.000148 | 0.003158 |
| 209995_s_TCL1A     | -0.00797 | 0.00101  | 0.01273  |
| 209999_x_SOCS1     | -0.00363 | 0.00422  | 0.0352   |
| 210009_s_GOSR2     | 0.00827  | 0.004936 | 0.03909  |
| 210014_x_IDH3B     | 0.007787 | 0.000226 | 0.004263 |
| 210020_x_CALML3    | 0.009497 | 0.002803 | 0.026669 |
| 210021_s_CCNO      | -0.0071  | 0.000189 | 0.003751 |
| 210029_at_IDO1     | -0.00631 | 0.000797 | 0.010723 |
| 210031_at_CD247    | -0.01031 | 5.89E-07 | 7.81E-05 |
| 210041_s_PGM3      | 0.007597 | 0.001674 | 0.018504 |
| 210045_at_IDH2     | 0.013937 | 7.49E-05 | 0.001932 |
| 210046_s_IDH2      | 0.009038 | 6.1E-05  | 0.00166  |
| 210049_at_SERPINC1 | 0.006802 | 0.005528 | 0.042142 |
| 210059_s_MAPK13    | -0.00564 | 0.006853 | 0.048931 |
| 210060_at_PDE6G    | -0.00584 | 0.001456 | 0.016767 |
| 210072_at_CCL19    | -0.02256 | 5.52E-07 | 7.49E-05 |
| 210074_at_CTSL2    | 0.01875  | 3.2E-07  | 5.25E-05 |
| 210079_x_KCNAB1    | 0.007043 | 0.000839 | 0.01114  |
| 210081_at_AGER     | -0.00501 | 0.005271 | 0.040922 |
| 210083_at_SEMA7A   | -0.00483 | 0.003806 | 0.032837 |
| 210084_x_TPSAB1    | -0.01572 | 6.3E-06  | 0.000348 |
| 210085_s_ANXA9     | 0.011723 | 0.000675 | 0.009487 |
| 210114_at_INVS     | 0.007678 | 0.000249 | 0.004584 |
| 210115_at_RPL39L   | -0.00847 | 1.47E-05 | 0.000603 |
| 210116_at_SH2D1A   | -0.01382 | 9.18E-05 | 0.002234 |
| 210119_at_KCNJ15   | 0.00823  | 3.62E-05 | 0.001127 |
| 210130_s_TM7SF2    | 0.005583 | 0.005384 | 0.041486 |
| 210140_at_CST7     | -0.01211 | 0.000131 | 0.00289  |
| 210145_at_PLA2G4A  | -0.01055 | 0.000365 | 0.006056 |
| 210146_x_LILRB2    | -0.01305 | 0.000357 | 0.005963 |
| 210166_at_TLR5     | -0.00761 | 0.000562 | 0.008298 |
| 210173_at_PTPRJ    | 0.005873 | 0.00404  | 0.034117 |
| 210184_at_ITGAX    | -0.00523 | 0.006441 | 0.047104 |
| 210199_at_CRYAA    | 0.016811 | 4.19E-05 | 0.001262 |
| 210201_x_BIN1      | 0.011319 | 2.51E-05 | 0.000867 |
| 210223_s_MR1       | -0.00606 | 0.004631 | 0.037476 |
| 210235_s_PPFIA1    | 0.005724 | 0.001878 | 0.020072 |
| 210237_at_ARTN     | -0.00542 | 0.001669 | 0.01848  |
| 210254_at_MS4A3    | -0.00493 | 0.00367  | 0.032021 |
| 210258_at_RGS13    | -0.00719 | 0.000742 | 0.010162 |
| 210260_s_TNFAIP8   | -0.00882 | 0.000662 | 0.009337 |
| 210289_at_NAT8     | 0.018956 | 8.69E-05 | 0.002142 |
| 210293_s_SEC23B    | -0.00711 | 0.006537 | 0.047497 |
| 210329_s_SGCD      | -0.00612 | 0.003084 | 0.028369 |
| 210330_at_SGCD     | -0.00661 | 0.003764 | 0.032624 |
| 210331_at_HECW1    | 0.008164 | 0.006527 | 0.047474 |

|                    |           |          |          |
|--------------------|-----------|----------|----------|
| 210337_s_ACLY      | 0.009098  | 2.54E-06 | 0.000188 |
| 210338_s_HSPA8     | 0.007788  | 1.27E-05 | 0.000544 |
| 210340_s_CSF2RA    | -0.00611  | 0.002945 | 0.027494 |
| 210343_s_SLC22A6   | 0.02394   | 1.23E-07 | 3.02E-05 |
| 210356_x_MS4A1     | -0.02087  | 2.74E-06 | 0.000198 |
| 210359_at_MTSS1    | 0.011181  | 0.000317 | 0.005457 |
| 210361_s_ELF2      | -0.00702  | 0.000124 | 0.002783 |
| 210371_s_RBBP4     | -0.00417  | 0.001818 | 0.019636 |
| 210374_x_PTGER3    | 0.010048  | 5.81E-05 | 0.00161  |
| 210375_at_PTGER3   | 0.011393  | 0.000463 | 0.007219 |
| 210377_at_ACSM3    | 0.01119   | 0.000837 | 0.01112  |
| 210390_s_CCL14-CC  | 0.013416  | 0.000357 | 0.005963 |
| 210399_x_FUT6      | 0.00969   | 7.3E-06  | 0.000383 |
| 210400_at_GRIN2C   | -0.00438  | 0.003032 | 0.028059 |
| 210418_s_IDH3B     | 0.00947   | 1.94E-05 | 0.000714 |
| 210426_x_RORA      | 0.01038   | 1.05E-07 | 2.73E-05 |
| 210427_x_ANXA2     | -0.00842  | 0.002917 | 0.027368 |
| 210439_at_ICOS     | -0.00862  | 0.002961 | 0.02756  |
| 210448_s_P2RX5     | -0.00817  | 0.000716 | 0.00987  |
| 210451_at_PKLR     | 0.018849  | 1.56E-06 | 0.000141 |
| 210452_x_CYP4F2    | 0.023695  | 1.94E-07 | 3.77E-05 |
| 210476_s_PRLR      | 0.01757   | 4.77E-07 | 6.64E-05 |
| 210479_s_RORA      | 0.010115  | 6.09E-06 | 0.000338 |
| 210480_s_MYO6      | 0.007233  | 0.00011  | 0.002532 |
| 210493_s_MFAP3L    | 0.008973  | 4.92E-05 | 0.001439 |
| 210495_x_FN1       | -0.0088   | 0.00193  | 0.02048  |
| 210513_s_VEGFA     | 0.013192  | 2.54E-06 | 0.000188 |
| 210529_s_FAM115A   | 0.009101  | 0.001402 | 0.016282 |
| 210538_s_BIRC3     | -0.0121   | 0.000377 | 0.006188 |
| 210544_s_ALDH3A2   | 0.010636  | 0.000796 | 0.010723 |
| 210549_s_CCL23     | -0.00594  | 0.000977 | 0.012412 |
| 210565_at_GCGR     | -0.0047   | 0.005683 | 0.042991 |
| 210572_at_PCDHA2   | -0.00539  | 0.003394 | 0.030299 |
| 210607_at_FLT3LG   | -0.0061   | 0.001116 | 0.013741 |
| 210619_s_HYAL1     | 0.010352  | 4.76E-05 | 0.001398 |
| 210627_s_MOGS      | 0.005627  | 0.0025   | 0.024546 |
| 210629_x_LST1      | -0.01293  | 1.16E-06 | 0.000117 |
| 210633_x_KRT10     | -0.00408  | 0.006827 | 0.04878  |
| 210640_s_GPER      | 0.005582  | 0.002952 | 0.027529 |
| 210644_s_LAIR1     | -8.41E-03 | 0.000478 | 0.007392 |
| 210648_x_SNX3      | -0.00365  | 0.000304 | 0.005295 |
| 210653_s_BCKDHB    | 0.009355  | 0.000518 | 0.00783  |
| 210654_at_TNFRSF10 | 0.006583  | 1.55E-05 | 0.000615 |
| 210659_at_CMKLR1   | -0.00538  | 0.004639 | 0.03751  |
| 210660_at_LILRA1   | -0.00623  | 0.005537 | 0.042196 |
| 210663_s_KYNU      | 0.013592  | 1.69E-05 | 0.000648 |
| 210688_s_CPT1A     | 0.007084  | 0.00667  | 0.048085 |
| 210701_at_CFDP1    | 0.007305  | 0.002061 | 0.021356 |
| 210704_at_FEZ2     | -0.00431  | 0.006795 | 0.04867  |
| 210732_s_LGALS8    | 0.006651  | 0.005766 | 0.043484 |
| 210737_at_TUB      | 0.006023  | 0.000146 | 0.003135 |
| 210738_s_SLC4A4    | 0.019584  | 9.03E-06 | 0.000437 |
| 210739_x_SLC4A4    | 0.018082  | 1.78E-07 | 3.59E-05 |



|                  |           |          |          |
|------------------|-----------|----------|----------|
| 210740_s_ITPK1   | 0.002954  | 0.00315  | 0.028761 |
| 210742_at_CDC14A | 0.009864  | 0.00178  | 0.01938  |
| 210743_s_CDC14A  | 0.008845  | 0.003852 | 0.03309  |
| 210744_s_IL5RA   | -0.00498  | 0.005931 | 0.044423 |
| 210750_s_DLGAP1  | -0.00523  | 0.001615 | 0.018048 |
| 210751_s_RGN     | 0.009047  | 0.00296  | 0.02756  |
| 210754_s_LYN     | -0.00825  | 0.001797 | 0.019502 |
| 210757_x_DAB2    | 0.007418  | 0.000233 | 0.004368 |
| 210785_s_C1orf38 | -0.00759  | 0.002951 | 0.027526 |
| 210786_s_FLI1    | -0.00958  | 1.78E-05 | 0.000673 |
| 210791_s_ARHGAP3 | 0.007154  | 0.00208  | 0.021524 |
| 210796_x_SIGLEC6 | -0.00926  | 6.95E-05 | 0.001824 |
| 210804_x_SLC8A1  | 0.010395  | 0.000923 | 0.011932 |
| 210807_s_SLC16A7 | 0.010721  | 0.000353 | 0.00592  |
| 210820_x_COQ7    | 0.006134  | 0.003029 | 0.028047 |
| 210824_at        | 0.008014  | 0.00665  | 0.048054 |
| 210825_s_PEBP1   | 0.00318   | 0.002694 | 0.025928 |
| 210829_s_SSBP2   | -0.00648  | 0.001007 | 0.012708 |
| 210831_s_PTGER3  | 0.009021  | 0.000557 | 0.008257 |
| 210832_x_PTGER3  | 0.011711  | 1.49E-05 | 0.000603 |
| 210833_at_PTGER3 | 0.014713  | 6.33E-06 | 0.000348 |
| 210834_s_PTGER3  | 0.014552  | 2.92E-05 | 0.000963 |
| 210839_s_ENPP2   | 0.012487  | 6.16E-07 | 8.02E-05 |
| 210840_s_IQGAP1  | -0.00724  | 9.49E-05 | 0.002284 |
| 210843_s_MFAP3L  | 0.008024  | 0.000153 | 0.003242 |
| 210852_s_AASS    | 0.008468  | 1.4E-05  | 0.00058  |
| 210854_x_SLC6A8  | 0.011202  | 0.002821 | 0.026766 |
| 210871_x_SSX2IP  | 0.009967  | 1.32E-05 | 0.000557 |
| 210883_x_EFNB3   | -4.33E-03 | 0.003134 | 0.028721 |
| 210889_s_FCGR2B  | -0.01278  | 3.03E-07 | 5.07E-05 |
| 210895_s_CD86    | -0.00862  | 0.000169 | 0.003473 |
| 210896_s_ASPH    | 0.008817  | 0.004897 | 0.038973 |
| 210912_x_GSTM4   | 0.010581  | 7.23E-06 | 0.00038  |
| 210915_x_TRBC1   | -0.02395  | 4.35E-07 | 6.38E-05 |
| 210916_s_CD44    | -0.01286  | 0.00451  | 0.036695 |
| 210930_s_ERBB2   | 0.007623  | 0.0022   | 0.022384 |
| 210944_s_CAPN3   | 0.013734  | 0.000424 | 0.006758 |
| 210947_s_MSH3    | 0.007068  | 0.000571 | 0.008411 |
| 210951_x_RAB27A  | -0.01094  | 0.000482 | 0.007433 |
| 210958_s_MAST4   | 6.34E-03  | 0.000699 | 0.009728 |
| 210961_s_ADRA1D  | -0.00346  | 0.006295 | 0.046344 |
| 210966_x_LARP1   | 0.008233  | 0.00095  | 0.012162 |
| 210972_x_TRAC    | -0.01449  | 3.39E-05 | 0.001067 |
| 210981_s_GRK6    | -0.00593  | 0.003363 | 0.030146 |
| 210982_s_HLA-DRA | -0.01169  | 0.000305 | 0.005305 |
| 210983_s_MCM7    | -0.00554  | 0.000205 | 0.003984 |
| 210984_x_EGFR    | 0.006013  | 0.005117 | 0.04007  |
| 210986_s_TPM1    | -0.00968  | 5.82E-05 | 0.00161  |
| 210987_x_TPM1    | -7.25E-03 | 0.00037  | 0.006098 |
| 210992_x_FCGR2C  | -0.00796  | 9.39E-05 | 0.002269 |
| 210996_s_YWHAE   | 0.002935  | 0.000304 | 0.005291 |
| 210999_s_GRB10   | 7.80E-03  | 8.04E-05 | 0.002023 |
| 211002_s_TRIM29  | -0.00693  | 0.004736 | 0.038016 |

|                   |           |          |          |
|-------------------|-----------|----------|----------|
| 211005_at LAT     | -0.01043  | 0.000415 | 0.006665 |
| 211016_x_HSPA4    | 0.007669  | 0.000211 | 0.004069 |
| 211020_at GCNT2   | 0.005883  | 0.004563 | 0.037041 |
| 211028_s_KHK      | 0.023065  | 2.55E-08 | 1.37E-05 |
| 211034_s_C12orf51 | 0.005804  | 0.000108 | 0.002505 |
| 211042_x_MCAM     | -0.00555  | 0.002508 | 0.024589 |
| 211063_s_NCK1     | -0.00726  | 0.0022   | 0.022384 |
| 211067_s_GAS7     | -0.00503  | 0.002729 | 0.026179 |
| 211075_s_CD47     | -0.00799  | 0.000602 | 0.008684 |
| 211083_s_MAP3K13  | 0.009617  | 7.81E-05 | 0.001988 |
| 211103_at MYO7A   | 0.007274  | 0.006812 | 0.048714 |
| 211105_s_NFATC1   | -0.00715  | 0.000407 | 0.006566 |
| 211136_s_CLPTM1   | 0.0153    | 8.33E-06 | 0.000412 |
| 211138_s_KMO      | 0.0198    | 1.1E-06  | 0.000114 |
| 211161_s_COL3A1   | -0.01639  | 0.000131 | 0.002901 |
| 211162_x_SCD      | 0.007962  | 0.000251 | 0.00461  |
| 211168_s_UPF1     | 0.007412  | 0.000172 | 0.003513 |
| 211174_s_CCKAR    | -0.00356  | 0.005278 | 0.040928 |
| 211178_s_PSTPIP1  | -0.00461  | 0.004397 | 0.03613  |
| 211179_at RUNX1   | -0.00469  | 0.006627 | 0.047977 |
| 211184_s_USH1C    | 0.01304   | 0.000384 | 0.006294 |
| 211185_s_SF3B1    | -0.00334  | 0.003862 | 0.033156 |
| 211189_x_CD84     | -0.00705  | 0.000232 | 0.00435  |
| 211190_x_CD84     | -0.00871  | 0.000202 | 0.003947 |
| 211192_s_CD84     | -0.01183  | 1.52E-05 | 0.00061  |
| 211210_x_SH2D1A   | -0.00504  | 0.003905 | 0.033379 |
| 211211_x_SH2D1A   | -0.00605  | 0.001188 | 0.014409 |
| 211231_x_CYP4A11  | 0.027506  | 1.72E-09 | 2.95E-06 |
| 211266_s_GPR4     | -5.83E-03 | 0.00237  | 0.023597 |
| 211270_x_PTBP1    | 0.002585  | 0.005026 | 0.039637 |
| 211276_at TCEAL2  | 0.011624  | 0.000213 | 0.004109 |
| 211298_s_ALB      | 0.035594  | 1.07E-07 | 2.73E-05 |
| 211302_s_PDE4B    | -0.00685  | 0.000788 | 0.010659 |
| 211303_x_FOLH1B   | 0.022032  | 5.88E-07 | 7.81E-05 |
| 211320_s_PTPRU    | -0.00466  | 0.005405 | 0.041592 |
| 211322_s_SARDH    | 0.012447  | 5.92E-05 | 0.001623 |
| 211339_s_ITK      | -0.00896  | 0.000324 | 0.005544 |
| 211347_at CDC14B  | 0.006315  | 3.97E-03 | 0.033757 |
| 211348_s_CDC14B   | 0.005044  | 0.00065  | 0.009188 |
| 211357_s_ALDOB    | 0.012088  | 0.000409 | 0.006582 |
| 211360_s_ITPR2    | 0.006257  | 0.001595 | 0.017883 |
| 211366_x_CASP1    | -0.01448  | 2.97E-07 | 5.01E-05 |
| 211367_s_CASP1    | -0.01061  | 0.002596 | 0.025251 |
| 211368_s_CASP1    | -0.01803  | 4.62E-07 | 6.53E-05 |
| 211382_s_TACC2    | 0.007537  | 0.000224 | 0.004241 |
| 211395_x_FCGR2C   | -0.00958  | 0.000588 | 0.008539 |
| 211401_s_FGFR2    | 0.011547  | 0.000145 | 0.003134 |
| 211406_at IER3IP1 | 3.80E-03  | 0.003463 | 0.030757 |
| 211416_x_GGTLC1   | 0.008843  | 0.000514 | 0.007779 |
| 211417_x_GGT1     | 0.010379  | 0.000155 | 0.003268 |
| 211421_s_RET      | -0.00773  | 0.000876 | 0.011446 |
| 211429_s_SERPINA1 | 0.013386  | 9.89E-07 | 0.000108 |
| 211430_s_IGHG1    | -0.02861  | 0.000146 | 0.003136 |

|                  |           |          |          |
|------------------|-----------|----------|----------|
| 211432_s_TYRO3   | 0.010637  | 0.001812 | 0.019609 |
| 211447_s_PDE4A   | -0.00412  | 0.002979 | 0.027684 |
| 211453_s_AKT2    | 0.005848  | 0.003967 | 0.033701 |
| 211456_x_MT1P2   | 0.009908  | 0.002569 | 0.02507  |
| 211465_x_FUT6    | 0.014086  | 8.04E-08 | 2.62E-05 |
| 211478_s_DPP4    | 0.013981  | 0.000101 | 0.002395 |
| 211494_s_SLC4A4  | 0.014401  | 8.57E-07 | 9.74E-05 |
| 211502_s_CDK14   | 0.007004  | 0.000106 | 0.002474 |
| 211505_s_STAU1   | 0.010128  | 0.000197 | 0.003868 |
| 211509_s_RTN4    | 0.003042  | 0.006054 | 0.045063 |
| 211527_x_VEGFA   | 0.008033  | 0.000797 | 0.010723 |
| 211530_x_HLA-G   | -0.00583  | 0.000615 | 0.00882  |
| 211542_x_RPS10   | -0.00919  | 2.12E-05 | 0.000765 |
| 211549_s_HPGD    | 0.006609  | 0.006708 | 0.048238 |
| 211552_s_ALDH4A1 | 0.016614  | 4.63E-07 | 6.53E-05 |
| 211569_s_HADH    | 0.015512  | 7.22E-07 | 8.78E-05 |
| 211570_s_RAPSN   | -0.00393  | 0.007029 | 0.049725 |
| 211571_s_VCAN    | -0.01889  | 0.001227 | 0.014773 |
| 211576_s_SLC19A1 | 0.007398  | 0.00691  | 0.049212 |
| 211581_x_LST1    | -0.01594  | 9.71E-08 | 2.7E-05  |
| 211582_x_LST1    | -1.51E-02 | 1.54E-06 | 0.00014  |
| 211597_s_HOPX    | -0.02298  | 9.49E-08 | 2.68E-05 |
| 211615_s_LRPPRC  | 0.006428  | 0.001138 | 0.01395  |
| 211630_s_GSS     | 0.008698  | 0.000437 | 0.006919 |
| 211633_x_at      | -0.01059  | 0.001693 | 0.01865  |
| 211634_x_IGHM    | -0.01272  | 0.006116 | 0.045322 |
| 211635_x_IGHA1   | -0.01058  | 0.003129 | 0.028692 |
| 211639_x_IGHA1   | -0.00885  | 0.006475 | 0.047244 |
| 211640_x_IGHG1   | -0.01176  | 0.001076 | 0.01338  |
| 211641_x_IGHA1   | -0.00985  | 0.003006 | 0.027866 |
| 211643_x_IGK@    | -0.01622  | 0.002146 | 0.022005 |
| 211644_x_IGK@    | -0.02044  | 0.0024   | 0.023813 |
| 211645_x_at      | -0.01881  | 0.000789 | 0.010671 |
| 211647_x_IGHG1   | -0.0089   | 0.001092 | 0.013535 |
| 211648_at_IGHG1  | -5.31E-03 | 0.005173 | 0.040319 |
| 211649_x_IGHA1   | -0.00679  | 0.002768 | 0.026469 |
| 211682_x_UGT2B28 | 0.010885  | 7.38E-06 | 0.000386 |
| 211696_x_HBB     | -0.02033  | 0.000101 | 0.002391 |
| 211699_x_HBA1    | -0.0186   | 0.00083  | 0.011049 |
| 211704_s_SPIN2A  | -0.00427  | 0.004647 | 0.037532 |
| 211708_s_SCD     | 0.008748  | 0.002295 | 0.023084 |
| 211712_s_ANXA9   | 0.009246  | 1.45E-05 | 0.000595 |
| 211719_x_FN1     | -0.00901  | 0.002281 | 0.022963 |
| 211725_s_BID     | -0.00859  | 0.000116 | 0.002637 |
| 211734_s_FCER1A  | -0.01958  | 1.14E-05 | 0.000506 |
| 211742_s_EVI2B   | -0.01887  | 9.29E-07 | 0.000103 |
| 211743_s_PRG2    | -0.00463  | 0.003678 | 0.032068 |
| 211745_x_HBA1    | -0.0202   | 0.000254 | 0.004639 |
| 211776_s_EPB41L3 | 0.010923  | 9.12E-06 | 0.000438 |
| 211778_s_OVOL2   | -0.00675  | 0.000407 | 0.006566 |
| 211790_s_MLL2    | 0.005528  | 0.005824 | 0.043816 |
| 211791_s_KCNAB2  | 0.00499   | 0.006579 | 0.047721 |
| 211794_at_FYB    | -0.0117   | 0.000317 | 0.005461 |

|                    |          |          |          |
|--------------------|----------|----------|----------|
| 211795_s_FYB       | -0.01518 | 1.51E-07 | 3.34E-05 |
| 211796_s_TRBC1     | -0.02838 | 3.76E-06 | 0.000245 |
| 211802_x_CACNA1G   | -0.00488 | 0.000259 | 0.004701 |
| 211806_s_KCNJ15    | 0.014037 | 4.11E-06 | 0.000263 |
| 211822_s_NLRP1     | -0.00532 | 0.001425 | 0.016461 |
| 211826_s_AFF1      | 0.005421 | 0.003671 | 0.032021 |
| 211831_s_THPO      | 0.007268 | 0.002199 | 0.022384 |
| 211835_at_IGKV1-5  | -0.00452 | 0.003148 | 0.028761 |
| 211841_s_TNFRSF25  | -0.00337 | 0.006934 | 0.049319 |
| 211843_x_CYP3A7    | 0.012938 | 4.34E-05 | 0.001299 |
| 211856_x_CD28      | -0.0046  | 0.006404 | 0.046911 |
| 211864_s_MYOF      | -0.0082  | 0.004152 | 0.034747 |
| 211868_x_IGHA1     | -0.00561 | 0.005429 | 0.041721 |
| 211882_x_FUT6      | 0.005856 | 0.001179 | 0.014314 |
| 211883_x_CEACAM1   | 0.010701 | 7.11E-06 | 0.000374 |
| 211885_x_FUT6      | 0.010796 | 0.000125 | 0.002807 |
| 211887_x_MSR1      | -0.00942 | 0.002322 | 0.023275 |
| 211889_x_CEACAM1   | 0.006428 | 0.001535 | 0.017431 |
| 211890_x_CAPN3     | 0.017621 | 1.24E-05 | 0.000535 |
| 211900_x_CD6       | -0.00485 | 0.004245 | 0.035297 |
| 211902_x_TRD@      | -0.01196 | 3.66E-05 | 0.001138 |
| 211907_s_PARD6B    | 0.006943 | 0.000149 | 0.003181 |
| 211910_at          | -0.00499 | 0.003063 | 0.028196 |
| 211917_s_PRLR      | 0.015078 | 1.29E-05 | 0.000549 |
| 211918_x_PAPPA2    | -0.0113  | 0.003845 | 0.033057 |
| 211919_s_CXCR4     | -0.01755 | 0.00026  | 0.004722 |
| 211922_s_CAT       | 0.011705 | 1.84E-05 | 0.000688 |
| 211932_at_HNRNPA3  | -0.00351 | 0.003336 | 0.030041 |
| 211941_s_PEBP1     | 0.009754 | 0.003981 | 0.033795 |
| 211958_at_IGFBP5   | 0.010151 | 0.000544 | 0.008106 |
| 211962_s_ZFP36L1   | -0.00733 | 4.21E-08 | 1.79E-05 |
| 211967_at_TMEM123  | -0.0074  | 0.001092 | 0.013535 |
| 211969_at_HSP90AA1 | 0.003947 | 0.003841 | 0.033042 |
| 211971_s_LRPPRC    | 0.005664 | 0.000286 | 0.005058 |
| 211977_at_GPR107   | 0.005619 | 0.005278 | 0.040928 |
| 211979_at_GPR107   | 0.006253 | 0.000302 | 0.005269 |
| 211984_at_CALM1    | 0.008776 | 0.00034  | 0.005762 |
| 211985_s_CALM1     | 0.003958 | 0.005687 | 0.043004 |
| 211991_s_HLA-DPA1  | -0.01283 | 0.004369 | 0.035966 |
| 211994_at_WNK1     | 0.006686 | 0.00442  | 0.036191 |
| 211999_at_H3F3B    | -0.00383 | 0.000882 | 0.011514 |
| 212000_at_SUGP2    | 0.005502 | 0.003814 | 0.032889 |
| 212014_x_CD44      | -0.01092 | 0.002397 | 0.023805 |
| 212016_s_PTBP1     | 0.006356 | 0.0039   | 0.033354 |
| 212017_at_FAM168B  | 0.005798 | 0.002566 | 0.025048 |
| 212022_s_MKI67     | -0.00812 | 0.003188 | 0.029008 |
| 212032_s_PTOV1     | 0.00898  | 0.002621 | 0.025415 |
| 212044_s_RPL27A    | -0.00643 | 0.004565 | 0.037049 |
| 212049_at_WIPF2    | 0.005832 | 0.002855 | 0.027057 |
| 212051_at_WIPF2    | 0.006688 | 0.000398 | 0.006454 |
| 212053_at_PDXDC1   | 0.006997 | 0.000346 | 0.00585  |
| 212063_at_CD44     | -0.01582 | 0.000215 | 0.004116 |
| 212068_s_BAT2L1    | 0.00503  | 0.002042 | 0.021275 |

|                     |          |          |          |
|---------------------|----------|----------|----------|
| 212083_at TEX261    | 0.008586 | 0.001555 | 0.017548 |
| 212103_at KPNA6     | 0.012287 | 0.002024 | 0.021165 |
| 212110_at SLC39A14  | 0.012176 | 5.4E-05  | 0.00153  |
| 212137_at LARP1     | 0.006923 | 0.000624 | 0.008905 |
| 212155_at RNF187    | 0.003293 | 0.001606 | 0.017946 |
| 212162_at KIDINS220 | 0.005699 | 0.00485  | 0.038673 |
| 212166_at XPO7      | 0.005315 | 0.000239 | 0.004439 |
| 212171_x VEGFA      | 0.007738 | 0.000732 | 0.010059 |
| 212174_at AK2       | 0.006598 | 0.003014 | 0.027914 |
| 212175_s AK2        | 0.00817  | 1.22E-05 | 0.000529 |
| 212178_s POM121     | 6.21E-03 | 0.000311 | 0.00539  |
| 212192_at KCTD12    | -0.00754 | 0.003373 | 0.030154 |
| 212193_s LARP1      | 0.011948 | 0.000403 | 0.006517 |
| 212198_s TM9SF4     | 7.53E-03 | 0.005754 | 0.043419 |
| 212203_x IFITM3     | -0.01187 | 0.002046 | 0.02129  |
| 212206_s H2AFV      | 0.00659  | 0.001147 | 0.014001 |
| 212216_at PREPL     | 0.005517 | 0.001394 | 0.016216 |
| 212221_x IDS        | -0.00557 | 0.00061  | 0.008773 |
| 212226_s PPAP2B     | 0.013259 | 1.11E-05 | 0.000497 |
| 212229_s FBXO21     | 0.008952 | 0.000492 | 0.007527 |
| 212230_at PPAP2B    | 0.0059   | 0.001817 | 0.019636 |
| 212231_at FBXO21    | 0.00891  | 1.27E-05 | 0.000544 |
| 212234_at ASXL1     | 0.004938 | 0.001071 | 0.013334 |
| 212248_at MTDH      | 0.00648  | 0.00313  | 0.028692 |
| 212269_s MCM3AP     | 0.004154 | 0.002355 | 0.023534 |
| 212271_at MAPK1     | 0.005333 | 0.003913 | 0.033424 |
| 212334_at GNS       | 0.006434 | 0.000485 | 0.007463 |
| 212335_at GNS       | 0.006365 | 0.005946 | 0.044525 |
| 212352_s TMED10     | -0.00606 | 1.19E-05 | 0.000522 |
| 212359_s KIAA0913   | 0.005887 | 0.000402 | 0.006517 |
| 212361_s ATP2A2     | 0.010233 | 0.00017  | 0.003488 |
| 212364_at MYO1B     | -0.00679 | 0.001873 | 0.020038 |
| 212369_at ZNF384    | 0.004723 | 0.00123  | 0.014781 |
| 212382_at TCF4      | -0.00957 | 0.00189  | 0.020154 |
| 212383_at ATP6V0A1  | 0.00539  | 0.003554 | 0.031284 |
| 212387_at TCF4      | -0.00657 | 0.006686 | 0.048139 |
| 212391_x RPS3A      | -0.00522 | 5.09E-05 | 0.001469 |
| 212394_at KIAA0090  | 0.009193 | 0.000483 | 0.007433 |
| 212395_s KIAA0090   | 0.003796 | 0.004358 | 0.03593  |
| 212401_s CDK11A     | -0.00583 | 0.002881 | 0.027186 |
| 212432_at GRPEL1    | 0.011919 | 1.06E-08 | 7.88E-06 |
| 212434_at GRPEL1    | 0.011039 | 1.8E-06  | 0.000154 |
| 212438_at SNRNP27   | -0.00365 | 0.006151 | 0.045503 |
| 212445_s NEDD4L     | 0.008743 | 1.03E-05 | 0.000473 |
| 212448_at NEDD4L    | 0.011322 | 4.41E-07 | 6.42E-05 |
| 212456_at KIAA0664  | 0.007388 | 1.48E-06 | 0.000137 |
| 212468_at SPAG9     | 0.006538 | 0.000474 | 0.007351 |
| 212470_at SPAG9     | 0.007195 | 0.000174 | 0.003552 |
| 212480_at SPECC1L   | 0.00529  | 0.004401 | 0.036135 |
| 212482_at RMND5A    | 0.005518 | 0.001839 | 0.019799 |
| 212484_at FAM89B    | -0.00599 | 0.000243 | 0.004496 |
| 212503_s DIP2C      | 0.010495 | 0.000173 | 0.00353  |
| 212504_at DIP2C     | 0.017723 | 2.29E-06 | 0.000177 |

|                    |           |          |          |
|--------------------|-----------|----------|----------|
| 212510_at GPD1L    | 0.006143  | 0.001058 | 0.013191 |
| 212518_at PIP5K1C  | 0.004834  | 0.005453 | 0.041777 |
| 212519_at UBE2E1   | -0.00545  | 0.000235 | 0.004397 |
| 212530_at NEK7     | -0.00573  | 0.003291 | 0.029768 |
| 212558_at SPRY1    | -0.00821  | 0.006445 | 0.047123 |
| 212568_s_DLAT      | 0.007255  | 0.001601 | 0.01792  |
| 212569_at SMCHD1   | -0.00818  | 0.000104 | 0.002431 |
| 212587_s_PTPRC     | -0.01625  | 0.000366 | 0.006064 |
| 212588_at PTPRC    | -0.01862  | 1.89E-07 | 3.73E-05 |
| 212592_at IGJ      | -0.02095  | 0.001705 | 0.018762 |
| 212593_s_PDCD4     | -0.00443  | 0.006401 | 0.046904 |
| 212598_at WDFY3    | 0.008002  | 0.004583 | 0.037157 |
| 212599_at AUTS2    | 0.008537  | 0.000193 | 0.003803 |
| 212600_s_UQCRC2    | 0.004845  | 0.007016 | 0.049649 |
| 212602_at WDFY3    | 0.005986  | 3.22E-05 | 0.00103  |
| 212636_at QKI      | -0.0069   | 0.001234 | 0.014808 |
| 212646_at RFTN1    | -6.61E-03 | 0.001469 | 0.016903 |
| 212647_at RRAS     | -0.00789  | 0.000574 | 0.008435 |
| 212650_at EHBP1    | 0.003313  | 0.006652 | 0.048054 |
| 212651_at RHOBTB1  | 0.009763  | 0.000867 | 0.011391 |
| 212655_at ZCCHC14  | 0.007162  | 0.002469 | 0.02434  |
| 212656_at TSFM     | 0.007244  | 7.89E-05 | 0.001996 |
| 212669_at CAMK2G   | 0.01156   | 1.72E-05 | 0.000658 |
| 212671_s_HLA-DQA1  | -0.01704  | 0.003217 | 0.029238 |
| 212683_at SLC25A44 | 0.006051  | 0.00212  | 0.02181  |
| 212688_at PIK3CB   | 0.004118  | 0.000462 | 0.007215 |
| 212692_s_LRBA      | 0.004968  | 0.006454 | 0.047153 |
| 212694_s_PCCB      | 0.011919  | 0.000929 | 0.011972 |
| 212695_at CRY2     | 0.008342  | 0.000283 | 0.005014 |
| 212699_at SCAMP5   | 0.004509  | 0.004034 | 0.0341   |
| 212701_at TLN2     | 0.020136  | 9.42E-09 | 7.49E-06 |
| 212703_at TLN2     | 0.018663  | 2.23E-10 | 9.93E-07 |
| 212706_at RASA4    | 0.006998  | 0.00581  | 0.043729 |
| 212714_at LARP4    | 0.007437  | 0.000227 | 0.004282 |
| 212715_s_MICAL3    | 0.006307  | 0.005236 | 0.040745 |
| 212722_s_JMJD6     | 0.005204  | 0.005965 | 0.044638 |
| 212741_at MAOA     | 0.013473  | 1.44E-07 | 3.28E-05 |
| 212748_at MKL1     | -0.00456  | 0.00668  | 0.048125 |
| 212750_at PPP1R16E | 0.022547  | 8.34E-08 | 2.62E-05 |
| 212757_s_CAMK2G    | 0.009926  | 0.000127 | 0.002833 |
| 212791_at C1orf216 | -0.00516  | 0.004509 | 0.036695 |
| 212805_at PRUNE2   | 0.007952  | 0.00154  | 0.01746  |
| 212806_at PRUNE2   | 0.012648  | 1.54E-05 | 0.000614 |
| 212818_s_ASB1      | 0.005962  | 0.006758 | 0.048438 |
| 212826_s_SLC25A6   | 0.003598  | 0.006955 | 0.049438 |
| 212827_at IGHM     | -0.01135  | 0.003095 | 0.028419 |
| 212836_at POLD3    | 0.00889   | 0.000137 | 0.003008 |
| 212857_x_SUB1      | -0.00337  | 0.00171  | 0.018792 |
| 212858_at PAQR4    | -0.00487  | 0.004893 | 0.038958 |
| 212865_s_COL14A1   | -0.01699  | 0.000192 | 0.003801 |
| 212873_at HMHA1    | -0.01045  | 3.31E-05 | 0.00105  |
| 212874_at APOE     | 0.013342  | 4.99E-06 | 0.000295 |
| 212883_at APOE     | 0.021766  | 3.72E-06 | 0.000245 |

|                    |          |          |          |
|--------------------|----------|----------|----------|
| 212884_x_APOE      | 0.013213 | 6.08E-06 | 0.000338 |
| 212890_at_SLC38A10 | 0.006399 | 0.003053 | 0.028175 |
| 212894_at_SUPV3L1  | 0.005872 | 0.002931 | 0.027469 |
| 212906_at_GRAMD1B  | 0.013368 | 3.48E-06 | 0.000234 |
| 212908_at_DNAJC16  | 0.019295 | 5.66E-06 | 0.000325 |
| 212911_at_DNAJC16  | 0.008845 | 0.000257 | 0.004684 |
| 212923_s_C6orf145  | 5.93E-03 | 0.003346 | 0.030088 |
| 212933_x_RPL13     | -0.00428 | 0.001347 | 0.015829 |
| 212950_at_GPR116   | 0.011358 | 1.2E-05  | 0.000526 |
| 212951_at_GPR116   | 0.009252 | 0.001593 | 0.017866 |
| 212959_s_GNPTAB    | -0.0068  | 0.000946 | 0.012124 |
| 212967_x_NAP1L1    | -0.00417 | 0.004908 | 0.038995 |
| 212992_at_AHNAK2   | -0.00753 | 0.00097  | 0.01234  |
| 212993_at_NACC2    | 0.006396 | 0.000785 | 0.010637 |
| 212998_x_HLA-DQB1  | -0.0131  | 0.001111 | 0.013698 |
| 213002_at_MARCKS   | -0.01046 | 0.000156 | 0.003279 |
| 213006_at_CEBPD    | 0.010528 | 0.003593 | 0.031488 |
| 213015_at_BBX      | 0.005771 | 0.006208 | 0.045792 |
| 213018_at_GATAD1   | 0.005462 | 0.005099 | 0.040007 |
| 213021_at_GOSR1    | 4.43E-03 | 0.006152 | 0.045503 |
| 213033_s_NFIB      | 0.0062   | 0.001117 | 0.013741 |
| 213034_at_SIK3     | 0.005316 | 0.003514 | 0.031025 |
| 213037_x_STAU1     | 0.007406 | 2.1E-05  | 0.000762 |
| 213040_s_NPTXR     | -0.00696 | 0.000224 | 0.004239 |
| 213045_at_MAST3    | 0.00751  | 0.000292 | 0.005143 |
| 213050_at_COBL     | 0.007344 | 1.16E-05 | 0.000514 |
| 213060_s_CHI3L2    | -0.00544 | 0.006484 | 0.047279 |
| 213063_at_ZC3H14   | 0.00616  | 0.000832 | 0.011062 |
| 213080_x_RPL5      | -0.00275 | 0.001042 | 0.013053 |
| 213113_s_SLC43A3   | -0.00779 | 0.000184 | 0.003692 |
| 213119_at_SLC36A1  | 0.007465 | 0.000546 | 0.008128 |
| 213132_s_MCAT      | 0.008086 | 0.000338 | 0.005735 |
| 213133_s_GCSH      | 0.005292 | 0.006756 | 0.048438 |
| 213136_at_PTPN2    | -0.00693 | 0.000483 | 0.007433 |
| 213137_s_PTPN2     | -0.00723 | 1.83E-05 | 0.000687 |
| 213140_s_SS18L1    | 0.010446 | 1.16E-06 | 0.000117 |
| 213151_s_SEPT7     | -0.00648 | 0.000317 | 0.005453 |
| 213160_at_DOCK2    | -0.0065  | 0.000894 | 0.011593 |
| 213164_at_SLC5A3   | 0.007401 | 0.001592 | 0.017861 |
| 213169_at_SEMA5A   | 0.010195 | 0.00119  | 0.014422 |
| 213180_s_GOSR2     | 0.00816  | 0.001545 | 0.017479 |
| 213181_s_MOCS1     | 0.005746 | 0.00611  | 0.045311 |
| 213184_at_SENP5    | 6.22E-03 | 0.000319 | 0.005478 |
| 213193_x_TRBC1     | -0.02742 | 1.81E-07 | 3.6E-05  |
| 213210_at_TAF6L    | 0.005403 | 0.003245 | 0.029472 |
| 213220_at_NCRNA001 | -0.00381 | 0.006658 | 0.04808  |
| 213221_s_SIK2      | 0.005065 | 0.004828 | 0.038547 |
| 213225_at_PPM1B    | -0.00477 | 0.004202 | 0.035087 |
| 213239_at_PIBF1    | -0.00575 | 0.003061 | 0.028196 |
| 213262_at_SACS     | -0.00893 | 0.001884 | 0.020118 |
| 213264_at_PCBP2    | 0.00833  | 6.44E-06 | 0.000353 |
| 213274_s_CTSB      | 0.014192 | 3.13E-06 | 0.000215 |
| 213275_x_CTSB      | 0.008782 | 5.25E-06 | 0.000306 |

|                    |           |          |          |
|--------------------|-----------|----------|----------|
| 213279_at DHRS1    | 0.006271  | 0.000963 | 0.012283 |
| 213289_at APOOL    | 0.010152  | 0.001254 | 0.014991 |
| 213293_s_TRIM22    | -0.01555  | 7.83E-07 | 9.23E-05 |
| 213310_at EIF2C2   | 0.005531  | 0.001827 | 0.019703 |
| 213317_at CLIC5    | 0.01347   | 0.004503 | 0.036662 |
| 213318_s_BAT3      | 0.010004  | 0.003896 | 0.033332 |
| 213326_at VAMP1    | -0.00714  | 0.005572 | 0.042369 |
| 213332_at PAPPA2   | -0.01346  | 0.000324 | 0.005544 |
| 213333_at MDH2     | 0.005569  | 0.003409 | 0.030405 |
| 213335_s_ST3GAL6   | 0.005009  | 0.002227 | 0.02256  |
| 213345_at NFATC4   | -0.00641  | 0.000595 | 0.008618 |
| 213362_at PTPRD    | 0.008724  | 3.13E-05 | 0.001008 |
| 213369_at CDHR1    | -6.45E-03 | 0.000573 | 0.008428 |
| 213374_x_HIBCH     | 0.009809  | 0.00042  | 0.006716 |
| 213377_x_RPS12     | -0.00818  | 1.53E-05 | 0.000612 |
| 213381_at C10orf72 | 1.84E-02  | 3.98E-07 | 6.04E-05 |
| 213383_at SBF1     | 0.007763  | 7.84E-05 | 0.00199  |
| 213393_at MFSD9    | 0.004617  | 0.005107 | 0.040028 |
| 213400_s_TBL1X     | 0.004675  | 0.005481 | 0.0419   |
| 213401_s_at        | 0.007149  | 0.005253 | 0.040823 |
| 213403_at          | 0.007331  | 0.001937 | 0.020543 |
| 213407_at PHLPP2   | 0.010022  | 2.37E-05 | 0.000828 |
| 213412_at TJP3     | -0.00406  | 0.003491 | 0.030937 |
| 213433_at ARL3     | 0.005849  | 0.004665 | 0.037628 |
| 213440_at RAB1A    | 0.004609  | 0.001286 | 0.015282 |
| 213448_at          | 0.008707  | 0.000852 | 0.011255 |
| 213454_at APITD1   | 0.00584   | 0.006666 | 0.048085 |
| 213475_s_ITGAL     | -0.0071   | 0.003116 | 0.0286   |
| 213476_x_TUBB3     | 0.00659   | 0.006777 | 0.048558 |
| 213478_at KAZ      | 0.009066  | 0.00299  | 0.027751 |
| 213501_at ACOX1    | 0.00975   | 6.73E-05 | 0.00178  |
| 213503_x_ANXA2     | -0.00857  | 0.002249 | 0.02273  |
| 213504_at COPS6    | 0.00893   | 9.36E-06 | 0.000441 |
| 213509_x_CES2      | 0.018656  | 3.6E-07  | 5.68E-05 |
| 213513_x_ARPC2     | -0.00384  | 0.001365 | 0.015967 |
| 213524_s_G0S2      | 0.005888  | 0.005509 | 0.042041 |
| 213535_s_UBE2I     | -0.00525  | 4.48E-05 | 0.001329 |
| 213537_at HLA-DPA1 | -0.01139  | 0.000885 | 0.011523 |
| 213539_at CD3D     | -0.01602  | 8.91E-06 | 0.000436 |
| 213543_at SGCD     | -0.00481  | 0.006632 | 0.047986 |
| 213544_at ING2     | 0.004711  | 0.004701 | 0.037809 |
| 213545_x_SNX3      | -0.00566  | 0.002582 | 0.025153 |
| 213546_at DKFZP586 | 0.007148  | 0.001294 | 0.015343 |
| 213549_at PDZD8    | 0.010025  | 0.000446 | 0.007035 |
| 213551_x_PCGF2     | 0.00775   | 0.000307 | 0.005332 |
| 213552_at GLCE     | 0.007396  | 0.001117 | 0.013741 |
| 213563_s_TUBGCP2   | 0.003496  | 0.004285 | 0.035548 |
| 213564_x_LDHB      | 0.003146  | 0.001749 | 0.019133 |
| 213566_at RNASE6   | -0.0169   | 4.71E-06 | 0.000285 |
| 213587_s_ATP6V0E2  | 0.008994  | 0.000695 | 0.00968  |
| 213595_s_CDC42BP1  | 0.007382  | 0.00338  | 0.030206 |
| 213603_s_RAC2      | -0.01799  | 1.05E-07 | 2.73E-05 |
| 213612_x_NBPF10    | -0.00568  | 0.00318  | 0.028962 |



|                    |           |          |          |
|--------------------|-----------|----------|----------|
| 213620_s_ICAM2     | -0.00638  | 0.001952 | 0.020654 |
| 213624_at SMPDL3A  | 0.010313  | 0.000117 | 0.002664 |
| 213625_at ZKSCAN4  | -0.00605  | 0.000935 | 0.012028 |
| 213626_at CBR4     | 5.43E-03  | 0.002878 | 0.02717  |
| 213642_at          | -0.00592  | 0.000101 | 0.002395 |
| 213657_s_at        | 0.015912  | 3.34E-07 | 5.32E-05 |
| 213658_at          | 0.010255  | 0.000831 | 0.011057 |
| 213663_s_at        | 0.010924  | 0.000287 | 0.005069 |
| 213664_at SLC1A1   | 0.015663  | 9.7E-07  | 0.000107 |
| 213667_at SRCAP    | -0.00325  | 0.004966 | 0.039258 |
| 213674_x_IGHD      | -0.01186  | 5.98E-05 | 0.001636 |
| 213687_s_RPL35A    | -0.00619  | 6.33E-05 | 0.001704 |
| 213692_s_VDR       | 0.010663  | 0.000105 | 0.002464 |
| 213697_at HIPK3    | 0.0052    | 0.002288 | 0.023018 |
| 213705_at LOC10050 | 0.007162  | 1.81E-05 | 0.00068  |
| 213706_at GPD1     | 0.021734  | 1.9E-06  | 0.000158 |
| 213713_s_GLB1L2    | 0.012486  | 2.12E-05 | 0.000765 |
| 213714_at CACNB2   | 0.006931  | 0.001604 | 0.017932 |
| 213724_s_PDK2      | 0.014761  | 7.1E-06  | 0.000374 |
| 213726_x_TUBB2C    | 0.005056  | 0.002003 | 0.021053 |
| 213728_at LAMP1    | 0.004923  | 0.004703 | 0.037812 |
| 213733_at MYO1F    | -0.00705  | 0.000176 | 0.003571 |
| 213738_s_ATP5A1    | 0.006159  | 2.1E-05  | 0.000762 |
| 213739_at          | 0.009106  | 0.000427 | 0.006792 |
| 213758_at COX4I1   | 0.006333  | 0.000941 | 0.012077 |
| 213763_at HIPK2    | 0.014603  | 9.36E-06 | 0.000441 |
| 213766_x_GNA11     | 0.0055    | 0.001291 | 0.015311 |
| 213787_s_EBP       | 0.010778  | 0.001326 | 0.01563  |
| 213792_s_INSR      | 0.014717  | 4.32E-08 | 1.79E-05 |
| 213800_at CFH      | -0.01126  | 0.000871 | 0.011416 |
| 213801_x_RPSA      | -0.005    | 0.00128  | 0.015245 |
| 213806_at PURA     | 0.005058  | 0.006751 | 0.04842  |
| 213814_s_SNTB2     | 0.006467  | 0.001224 | 0.014741 |
| 213823_at HOXA11   | -0.00818  | 0.000404 | 0.006535 |
| 213830_at TRD@     | -0.00655  | 0.001789 | 0.019443 |
| 213836_s_WIP11     | 0.007035  | 0.003219 | 0.029244 |
| 213839_at CLMN     | 0.005794  | 0.004478 | 0.036543 |
| 213857_s_CD47      | -0.01022  | 1.7E-06  | 0.000149 |
| 213861_s_FAM119B   | 0.01001   | 0.001233 | 0.014806 |
| 213862_at PNPLA2   | 0.00588   | 0.004652 | 0.03756  |
| 213864_s_NAP1L1    | -0.00486  | 0.000344 | 0.005811 |
| 213869_x_THY1      | 0.017405  | 5.86E-08 | 2.29E-05 |
| 213874_at SERPINA4 | 0.008175  | 0.000276 | 0.004933 |
| 213879_at          | -0.00474  | 5.78E-05 | 0.00161  |
| 213881_x_SUMO2     | -5.10E-03 | 7.98E-05 | 0.00201  |
| 213890_x_RPS16     | -0.00337  | 0.002173 | 0.022217 |
| 213891_s_TCF4      | -0.00977  | 0.001526 | 0.017403 |
| 213906_at MYBL1    | -0.00643  | 0.003333 | 0.030025 |
| 213909_at LRRC15   | -0.00477  | 0.005115 | 0.040067 |
| 213915_at NKG7     | -0.00768  | 0.000282 | 0.005002 |
| 213933_at PTGER3   | 0.012408  | 0.000162 | 0.003364 |
| 213940_s_FNBP1     | -0.00444  | 0.002365 | 0.023589 |
| 213944_x_GNA11     | 0.004092  | 0.005099 | 0.040007 |

|                   |           |          |          |
|-------------------|-----------|----------|----------|
| 213948_x_CADM3    | -0.0051   | 0.001407 | 0.016316 |
| 213958_at_CD6     | -0.00741  | 0.001352 | 0.015867 |
| 213967_at_RALYL   | 0.019031  | 1.18E-05 | 0.000518 |
| 213975_s_LYZ      | -0.02898  | 2.46E-08 | 1.37E-05 |
| 213985_s_C19orf6  | 0.008396  | 0.005183 | 0.040385 |
| 213994_s_SPON1    | -0.01255  | 0.002406 | 0.023864 |
| 214000_s_RGS10    | -0.015    | 1.05E-05 | 0.000482 |
| 214001_x_at       | -0.00718  | 7.55E-06 | 0.000389 |
| 214003_x_RPS20    | -0.00297  | 0.001794 | 0.019477 |
| 214020_x_ITGB5    | -0.00485  | 0.003261 | 0.02959  |
| 214022_s_IFITM1   | -0.01557  | 3.85E-05 | 0.001182 |
| 214033_at_ABCC6   | 0.012479  | 0.000447 | 0.007043 |
| 214038_at_CCL8    | -0.0133   | 0.002492 | 0.024498 |
| 214041_x_RPL37A   | -0.00341  | 9.13E-05 | 0.002227 |
| 214043_at_PTPRD   | 0.008783  | 0.003775 | 0.032674 |
| 214051_at_TMSB15B | -0.0113   | 7.91E-06 | 0.000397 |
| 214052_x_BAT2L2   | -0.00606  | 0.001649 | 0.018341 |
| 214054_at_DOK2    | -0.00412  | 0.006328 | 0.046557 |
| 214066_x_NPR2     | 0.005036  | 0.002791 | 0.026617 |
| 214069_at_ACSM2A  | 0.021784  | 4.19E-07 | 6.23E-05 |
| 214080_x_PRKCSH   | 0.005663  | 0.000201 | 0.00392  |
| 214084_x_NCF1C    | -0.00527  | 0.003149 | 0.028761 |
| 214088_s_FUT3     | 0.018978  | 3.79E-09 | 5.62E-06 |
| 214091_s_GPX3     | 0.007568  | 3.33E-05 | 0.001052 |
| 214095_at_SHMT2   | 0.006491  | 0.004771 | 0.038243 |
| 214107_x_LOC44043 | 0.00389   | 0.004123 | 0.034583 |
| 214116_at         | 0.008604  | 0.000433 | 0.006873 |
| 214118_x_PCM1     | -0.00496  | 0.000672 | 0.009465 |
| 214149_s_ATP6V0E1 | -0.00311  | 0.006114 | 0.045322 |
| 214150_x_ATP6V0E1 | -0.00364  | 0.000156 | 0.003279 |
| 214170_x_FH       | 0.005023  | 0.006161 | 0.045539 |
| 214179_s_NFE2L1   | 0.008187  | 3.31E-05 | 0.00105  |
| 214180_at_MAN1C1  | 0.007382  | 0.001656 | 0.018384 |
| 214181_x_LST1     | -0.01741  | 1.57E-06 | 0.000142 |
| 214189_s_GGA2     | 0.006098  | 0.00244  | 0.024112 |
| 214190_x_GGA2     | 0.007191  | 0.000273 | 0.004896 |
| 214203_s_PRODH    | 0.009439  | 0.000687 | 0.009594 |
| 214204_at_PACRG   | 0.006443  | 0.003167 | 0.028888 |
| 214212_x_FERMT2   | 0.00512   | 0.003536 | 0.031174 |
| 214215_s_LARP4B   | 0.009787  | 0.000465 | 0.007241 |
| 214216_s_LARP4B   | 0.006402  | 0.004689 | 0.037737 |
| 214219_x_MAP4K1   | -0.00912  | 0.00042  | 0.006716 |
| 214231_s_KIAA0564 | 0.009289  | 1.03E-05 | 0.000473 |
| 214234_s_CYP3A5   | 0.013269  | 5.79E-05 | 0.00161  |
| 214235_at_CYP3A5  | 0.012325  | 1.28E-05 | 0.000547 |
| 214243_s_SERHL    | -0.00563  | 0.003062 | 0.028196 |
| 214261_s_ADH6     | 0.016305  | 1E-06    | 0.000108 |
| 214268_s_MTMR4    | 0.006796  | 0.000273 | 0.004889 |
| 214271_x_RPL12    | -4.96E-03 | 0.000537 | 0.008033 |
| 214274_s_ACAA1    | 0.014933  | 6.37E-08 | 2.33E-05 |
| 214286_at_GNAT1   | -0.00382  | 0.005448 | 0.041765 |
| 214308_s_HGD      | 0.012783  | 5.16E-05 | 0.001479 |
| 214321_at_NOV     | -1.49E-02 | 4.69E-07 | 6.57E-05 |

|                    |           |          |          |
|--------------------|-----------|----------|----------|
| 214332_s_TSMF      | 0.008084  | 0.000327 | 0.005591 |
| 214339_s_MAP4K1    | -0.00875  | 0.000925 | 0.011936 |
| 214342_at_ATXN7L1  | 0.00695   | 0.005669 | 0.04293  |
| 214343_s_ATXN7L1   | 9.89E-03  | 0.000748 | 0.010216 |
| 214347_s_DDC       | 0.014281  | 0.000985 | 0.012491 |
| 214367_at_RASGRP2  | -5.34E-03 | 0.004226 | 0.035219 |
| 214369_s_RASGRP2   | -0.00895  | 4.1E-05  | 0.00124  |
| 214370_at_S100A8   | -0.01325  | 0.002211 | 0.022452 |
| 214389_at_SLC5A12  | 0.021809  | 1.3E-05  | 0.000552 |
| 214400_at_INSL3    | -0.00559  | 0.001585 | 0.017802 |
| 214414_x_HBA1      | -0.02869  | 4E-05    | 0.001216 |
| 214423_x_ALDOB     | 0.020943  | 2.06E-06 | 0.000166 |
| 214424_s_ALDOB     | 0.028547  | 4.28E-06 | 0.00027  |
| 214428_x_C4A       | 0.010329  | 0.000122 | 0.002756 |
| 214433_s_SELENBP1  | 0.011305  | 2.1E-05  | 0.000762 |
| 214434_at_HSPA12A  | 0.010646  | 1.49E-05 | 0.000603 |
| 214437_s_SHMT2     | 0.008908  | 0.001306 | 0.015463 |
| 214438_at_HLX      | -0.00599  | 0.002327 | 0.023319 |
| 214439_x_BIN1      | 0.009547  | 0.000174 | 0.003552 |
| 214447_at_ETS1     | -0.00574  | 0.003593 | 0.031488 |
| 214450_at_CTSW     | -0.00593  | 0.00105  | 0.013134 |
| 214453_s_IFI44     | -0.01336  | 9.62E-05 | 0.002306 |
| 214456_x_SAA1      | -0.01211  | 9.63E-05 | 0.002307 |
| 214467_at_GPR65    | -0.0083   | 0.000786 | 0.010649 |
| 214469_at_HIST1H2A | -0.01177  | 0.000495 | 0.007567 |
| 214470_at_KLRB1    | -0.01646  | 1.68E-07 | 3.47E-05 |
| 214472_at_HIST1H2A | -0.00365  | 0.002231 | 0.022579 |
| 214475_x_CAPN3     | 0.016545  | 4.09E-05 | 0.001239 |
| 214481_at_HIST1H2A | -0.00567  | 0.001557 | 0.017557 |
| 214490_at_ARSF     | 0.018378  | 2.63E-07 | 4.57E-05 |
| 214493_s_INADL     | 0.004896  | 0.004603 | 0.03729  |
| 214499_s_BCLAF1    | -0.00379  | 0.003632 | 0.031739 |
| 214504_at_ABO      | 0.007276  | 0.006148 | 0.045503 |
| 214511_x_FCGR1B    | -0.00848  | 0.000888 | 0.011564 |
| 214533_at_CMA1     | -0.0081   | 2.77E-05 | 0.000931 |
| 214534_at_HIST1H1B | -0.0058   | 0.000867 | 0.011391 |
| 214537_at_HIST1H1D | -0.01197  | 1.39E-05 | 0.00058  |
| 214545_s_PROSC     | 0.007955  | 0.001874 | 0.020038 |
| 214560_at_FPR3     | -0.0102   | 0.003507 | 0.030983 |
| 214567_s_XCL1      | -0.01285  | 7.43E-06 | 0.000387 |
| 214574_x_LST1      | -0.0175   | 3.88E-07 | 5.93E-05 |
| 214581_x_TNFRSF21  | 0.012179  | 0.000101 | 0.002395 |
| 214583_at_DDI2     | 0.004845  | 0.003    | 0.027836 |
| 214591_at_KLHL4    | -0.00824  | 0.006985 | 0.049528 |
| 214604_at_HOXD11   | -0.00696  | 9.5E-06  | 0.000445 |
| 214615_at_P2RY10   | -0.00665  | 0.001856 | 0.019915 |
| 214617_at_PRF1     | -0.00871  | 5.2E-05  | 0.001486 |
| 214626_s_GANAB     | 0.005593  | 0.000576 | 0.00844  |
| 214643_x_BIN1      | 0.008266  | 0.000626 | 0.008929 |
| 214669_x_IGKC      | -0.02084  | 0.001123 | 0.013797 |
| 214677_x_IGLV1-44  | -0.02029  | 0.005662 | 0.042917 |
| 214678_x_ZFX       | -0.00711  | 0.005469 | 0.041826 |
| 214679_x_GNA11     | 0.005511  | 0.000199 | 0.003902 |

|                    |          |          |          |
|--------------------|----------|----------|----------|
| 214681_at GK       | 0.01478  | 1.57E-05 | 0.000619 |
| 214686_at ZNF266   | -0.0069  | 0.004463 | 0.036467 |
| 214696_at C17orf91 | 0.0099   | 0.000157 | 0.0033   |
| 214717_at PK155    | 0.006846 | 0.007035 | 0.04975  |
| 214723_x_ANKRD36   | -0.00869 | 0.006674 | 0.048098 |
| 214724_at DIXDC1   | 0.008823 | 1.22E-05 | 0.000529 |
| 214727_at BRCA2    | -0.00682 | 0.001905 | 0.020284 |
| 214730_s_GLG1      | 0.011496 | 0.003063 | 0.028196 |
| 214749_s_ARMCX6    | -0.00528 | 0.00375  | 0.032531 |
| 214758_at DCAF4    | -0.00392 | 0.005678 | 0.042979 |
| 214763_at ACOT11   | 0.012095 | 2.11E-06 | 0.000168 |
| 214768_x_IGKV1-5   | -0.01555 | 0.000848 | 0.011206 |
| 214776_x_XYLB      | 0.0134   | 2.75E-05 | 0.000927 |
| 214777_at IGKV4-1  | -0.01248 | 0.002892 | 0.027262 |
| 214778_at MEGF8    | 0.008611 | 3.4E-06  | 0.000229 |
| 214791_at SP140L   | -0.01007 | 0.000471 | 0.007317 |
| 214797_s_CDK18     | 0.006483 | 0.002109 | 0.021732 |
| 214807_at          | 0.009222 | 1.25E-05 | 0.000541 |
| 214811_at RIMBP2   | -0.00584 | 0.00305  | 0.028158 |
| 214829_at AASS     | 1.05E-02 | 0.003057 | 0.028188 |
| 214832_at HNF4A    | 0.016032 | 0.000166 | 0.003414 |
| 214836_x_IGK@      | -0.015   | 0.00532  | 0.041157 |
| 214842_s_at        | 0.020299 | 0.000905 | 0.011716 |
| 214844_s_DOK5      | -0.00782 | 0.004692 | 0.037751 |
| 214847_s_GPSM3     | -0.00513 | 0.00281  | 0.026714 |
| 214864_s_GRHPR     | 0.010778 | 1.93E-06 | 0.00016  |
| 214883_at THRA     | 0.004396 | 0.003144 | 0.028761 |
| 214891_at FBXO21   | 0.004558 | 0.005125 | 0.040102 |
| 214910_s_APOM      | 0.018618 | 0.000119 | 0.002691 |
| 214916_x_IGHA1     | -0.01505 | 0.000124 | 0.002778 |
| 214919_s_ANKHD1-E  | 0.005492 | 0.004849 | 0.038673 |
| 214920_at THSD7A   | 0.008422 | 0.000525 | 0.007906 |
| 214923_at ATP6V1D  | 1.35E-02 | 4.12E-06 | 0.000263 |
| 214937_x_PCM1      | -0.00411 | 0.00134  | 0.015779 |
| 214973_x_IGHD      | -0.0149  | 0.005561 | 0.042354 |
| 214992_s_DNASE2    | -0.00394 | 0.003718 | 0.032341 |
| 214994_at APOBEC3  | -0.00738 | 0.000701 | 0.009749 |
| 214999_s_RAB11FIP  | 0.02607  | 3.48E-08 | 1.62E-05 |
| 215005_at NECAB2   | 0.01563  | 1.3E-06  | 0.000126 |
| 215035_at IGLV6-57 | -0.00619 | 0.000671 | 0.009457 |
| 215036_at          | -0.01311 | 3.21E-05 | 0.00103  |
| 215038_s_SETD2     | 0.005722 | 0.005584 | 0.042423 |
| 215039_at HS2ST1   | -0.01164 | 3.96E-06 | 0.000255 |
| 215044_s_STAM2     | 0.005054 | 0.006664 | 0.048085 |
| 215049_x_CD163     | -0.01654 | 1.13E-05 | 0.000502 |
| 215051_x_AIF1      | -0.00808 | 0.001195 | 0.014474 |
| 215058_at DENND5B  | 0.00677  | 0.001866 | 0.019981 |
| 215059_at          | 0.017602 | 0.000219 | 0.004193 |
| 215073_s_NR2F2     | -0.00623 | 0.001409 | 0.016317 |
| 215076_s_COL3A1    | -0.01639 | 0.000232 | 0.00435  |
| 215121_x_IGLC7     | -0.02025 | 0.001676 | 0.018509 |
| 215125_s_UGT1A1    | 0.013577 | 3.52E-05 | 0.001098 |
| 215136_s_EXOSC8    | -0.00459 | 0.005409 | 0.041611 |

|                    |          |          |          |
|--------------------|----------|----------|----------|
| 215149_at          | 0.015103 | 8.85E-06 | 0.000434 |
| 215176_x_IGK@      | -0.02079 | 0.003328 | 0.029996 |
| 215177_s_ITGA6     | 0.006791 | 4.18E-05 | 0.00126  |
| 215188_at_STK24    | 0.010521 | 0.000732 | 0.010059 |
| 215194_at_PRKCA    | 1.05E-02 | 0.000166 | 0.003417 |
| 215198_s_CALD1     | 0.007814 | 1E-04    | 0.002383 |
| 215210_s_DLST      | 0.009657 | 2.52E-06 | 0.000188 |
| 215217_at_IGKC     | -0.02349 | 0.001389 | 0.016161 |
| 215233_at_JMJD6    | 0.007291 | 0.002904 | 0.027299 |
| 215236_s_PICALM    | 0.004745 | 0.004366 | 0.035956 |
| 215239_x_ZNF273    | -0.00518 | 3.7E-06  | 0.000245 |
| 215274_at_SLC12A3  | 0.022036 | 3.45E-09 | 5.49E-06 |
| 215275_at_TRAF3IP3 | -0.00717 | 0.001363 | 0.015961 |
| 215291_at_MKL1     | -0.00489 | 0.004776 | 0.038243 |
| 215363_x_FOLH1     | 0.024715 | 2.77E-07 | 4.74E-05 |
| 215364_s_KIAA0467  | 0.004676 | 0.005445 | 0.041765 |
| 215379_x_IGLC7     | -0.01695 | 0.004801 | 0.038375 |
| 215382_x_LOC10050  | -0.01481 | 3.72E-05 | 0.001149 |
| 215388_s_CFH       | -0.01442 | 6.99E-05 | 0.001832 |
| 215389_s_TNNT2     | 0.015156 | 0.000246 | 0.004549 |
| 215422_at          | 0.005572 | 0.002046 | 0.02129  |
| 215425_at_BTG3     | -0.00699 | 0.001483 | 0.017007 |
| 215436_at_HSDL2    | 0.012298 | 3.86E-05 | 0.001183 |
| 215450_at_SNRPE    | -0.00433 | 9.12E-05 | 0.002227 |
| 215452_x_SUMO4     | -0.0045  | 0.000259 | 0.004701 |
| 215471_s_MAP7      | 0.011706 | 4.67E-06 | 0.000284 |
| 215490_at_C1orf69  | 0.008231 | 3.12E-05 | 0.001007 |
| 215499_at_MAP2K3   | 0.004728 | 0.002271 | 0.022906 |
| 215502_at          | -0.00508 | 0.000566 | 0.00835  |
| 215524_x_TRAC      | -0.00569 | 0.002937 | 0.027482 |
| 215535_s_AGPAT1    | 0.006402 | 0.000543 | 0.008097 |
| 215559_at_ABCC6    | 0.017931 | 1E-06    | 0.000108 |
| 215569_at_GTF2IRD2 | 0.005497 | 0.00531  | 0.041114 |
| 215603_x_GGT1      | 0.009719 | 6.44E-05 | 0.001724 |
| 215632_at_NEUROG2  | -0.00381 | 0.002907 | 0.027312 |
| 215633_x_LST1      | -0.01222 | 1.08E-05 | 0.000492 |
| 215646_s_VCAN      | -0.02065 | 0.001285 | 0.015276 |
| 215672_s_AHCYL2    | 0.010598 | 0.000176 | 0.003571 |
| 215685_s_DLX2      | -0.00402 | 0.005069 | 0.039871 |
| 215691_x_HSPB11    | -0.00516 | 0.006392 | 0.046868 |
| 215696_s_SEC16A    | 0.006238 | 0.003487 | 0.03091  |
| 215707_s_PRNP      | 0.0118   | 1.87E-05 | 0.000698 |
| 215719_x_FAS       | -0.00974 | 0.001567 | 0.017641 |
| 215726_s_CYB5A     | 0.011518 | 1.46E-06 | 0.000136 |
| 215728_s_ACOT7     | 0.005741 | 0.006399 | 0.046904 |
| 215732_s_DTX2      | -0.00507 | 0.003601 | 0.031533 |
| 215739_s_TUBGCP3   | 0.0087   | 0.000579 | 0.008473 |
| 215746_at          | -0.00453 | 0.002066 | 0.021396 |
| 215758_x_ZNF93     | -0.00741 | 3.66E-06 | 0.000242 |
| 215771_x_RET       | -0.00511 | 0.003766 | 0.032635 |
| 215775_at          | -0.009   | 0.004233 | 0.035234 |
| 215783_s_ALPL      | 0.015179 | 4.78E-06 | 0.000286 |
| 215784_at_CD1E     | -0.01687 | 0.000129 | 0.002855 |

|                   |           |          |          |
|-------------------|-----------|----------|----------|
| 215785_s_CYFIP2   | 0.010652  | 1.55E-05 | 0.000614 |
| 215787_at ACTA2   | -0.01739  | 1.6E-05  | 0.000624 |
| 215789_s_AJAP1    | 0.004787  | 0.00255  | 0.02493  |
| 215794_x_GLUD2    | 0.011015  | 5.45E-05 | 0.001538 |
| 215796_at         | -0.00646  | 0.000678 | 0.009496 |
| 215812_s_SLC6A10P | 0.010958  | 0.001727 | 0.018923 |
| 215829_at SHANK2  | -0.00526  | 0.006733 | 0.048371 |
| 215842_s_ATP11A   | 0.00548   | 0.006523 | 0.047457 |
| 215881_x_SSX2     | -0.00591  | 0.000963 | 0.012283 |
| 215935_at FAM75A1 | -0.00527  | 0.006801 | 0.048699 |
| 215937_at PTGDR   | -0.00915  | 0.002089 | 0.021582 |
| 215946_x_IGLL3P   | -0.01093  | 0.007013 | 0.049643 |
| 215966_x_GK3P     | 0.017512  | 3.33E-07 | 5.32E-05 |
| 215967_s_LY9      | -0.0084   | 0.000269 | 0.004845 |
| 215975_x_at       | 0.016569  | 2.14E-06 | 0.000169 |
| 215977_x_GK       | 0.019669  | 8.48E-07 | 9.74E-05 |
| 215989_at CBX2    | -0.00524  | 0.00219  | 0.022338 |
| 216013_at ZXDB    | 0.006146  | 0.005169 | 0.040319 |
| 216015_s_NLRP3    | -0.00391  | 0.006826 | 0.04878  |
| 216024_at DNMT2   | 7.87E-03  | 1.05E-06 | 0.000111 |
| 216036_x_WDTC1    | 0.00477   | 0.00035  | 0.005883 |
| 216067_at         | -0.00504  | 0.004149 | 0.034747 |
| 216079_at EPM2A   | 0.004862  | 0.003741 | 0.032493 |
| 216091_s_BTRC     | 0.004888  | 0.000767 | 0.010448 |
| 216092_s_SLC7A8   | 0.016083  | 3.31E-05 | 0.00105  |
| 216150_at         | -0.00495  | 0.006001 | 0.044826 |
| 216179_x_at       | 0.008356  | 0.000145 | 0.003132 |
| 216191_s_TRDV3    | -1.58E-02 | 1.68E-08 | 1.04E-05 |
| 216207_x_IGKC     | -0.01696  | 0.000567 | 0.008368 |
| 216218_s_PLCL2    | 0.009129  | 0.000216 | 0.004138 |
| 216219_at AQP6    | 0.011254  | 5.05E-05 | 0.001466 |
| 216223_at CPN2    | 0.023933  | 4.31E-07 | 6.37E-05 |
| 216224_s_HDAC6    | 0.006551  | 0.00037  | 0.006099 |
| 216230_x_SMPD1    | 0.008825  | 0.000584 | 0.008515 |
| 216231_s_B2M      | -0.00913  | 0.002529 | 0.02476  |
| 216233_at CD163   | -0.00582  | 0.005734 | 0.043298 |
| 216237_s_MCM5     | -0.00548  | 0.001343 | 0.015782 |
| 216250_s_LPXN     | -0.00775  | 8.07E-05 | 0.002026 |
| 216305_s_C2orf3   | 0.006872  | 0.000421 | 0.006718 |
| 216308_x_GRHPR    | 0.012068  | 2.21E-06 | 0.000173 |
| 216316_x_GK       | 0.015345  | 2.4E-06  | 0.000181 |
| 216318_at IGHA1   | -0.01019  | 0.000109 | 0.002525 |
| 216320_x_MST1     | 0.010305  | 5.35E-05 | 0.001523 |
| 216333_x_TNXA     | -0.00612  | 0.00614  | 0.045476 |
| 216342_x_at       | -0.00465  | 3.5E-06  | 0.000235 |
| 216362_at         | 0.005109  | 0.004179 | 0.034936 |
| 216365_x_IGLV3-19 | -0.00851  | 0.000116 | 0.002641 |
| 216379_x_CD24     | -0.00814  | 2.59E-05 | 0.000887 |
| 216381_x_AKR7A3   | 1.69E-02  | 1.72E-05 | 0.000658 |
| 216383_at RPL18A  | -0.00417  | 0.001488 | 0.017061 |
| 216401_x_at       | -0.01205  | 0.001557 | 0.017557 |
| 216425_at         | 0.009375  | 0.000164 | 0.003404 |
| 216438_s_TMSB4X   | -0.01178  | 3.41E-05 | 0.001073 |

|                    |           |          |          |
|--------------------|-----------|----------|----------|
| 216442_x_FN1       | -0.00906  | 0.002391 | 0.023754 |
| 216452_at TRPM3    | 0.011323  | 2.94E-05 | 0.000968 |
| 216474_x_TPSAB1    | -0.01615  | 8.09E-06 | 0.000404 |
| 216485_s_TPSAB1    | -0.00706  | 0.001517 | 0.017317 |
| 216489_at TRPM3    | 0.013843  | 2.94E-06 | 0.000208 |
| 216491_x_IGHM      | -0.01424  | 0.006986 | 0.049528 |
| 216505_x_at        | -0.00708  | 0.000373 | 0.006128 |
| 216515_x_MIR1244-1 | -0.00441  | 0.002102 | 0.021674 |
| 216542_x_IGHA1     | -0.01356  | 0.005432 | 0.041724 |
| 216557_x_IGHA1     | -0.01495  | 0.003362 | 0.030146 |
| 216560_x_IGL@      | -0.01096  | 0.000995 | 0.012586 |
| 216573_at IGLV1-40 | -0.00541  | 0.004288 | 0.03556  |
| 216576_x_IGK@      | -0.02053  | 0.000466 | 0.007248 |
| 216580_at RPL7     | -0.00357  | 0.003989 | 0.033831 |
| 216595_at FAM186A  | 0.015619  | 0.001452 | 0.01672  |
| 216599_x_SLC22A6   | 0.025343  | 1.64E-07 | 3.41E-05 |
| 216600_x_ALDOB     | 0.019541  | 6.36E-06 | 0.000349 |
| 216603_at SLC7A8   | 0.022815  | 0.000151 | 0.003231 |
| 216604_s_SLC7A8    | 0.017244  | 1.74E-05 | 0.000662 |
| 216609_at TXN      | 0.004508  | 0.004932 | 0.03909  |
| 216632_at NAV3     | -0.00522  | 0.006811 | 0.048714 |
| 216638_s_PRLR      | 0.01877   | 9.85E-06 | 0.000455 |
| 216662_at MYO7B    | 0.006474  | 0.003151 | 0.028761 |
| 216693_x_HDGFRP3   | -0.00649  | 0.001161 | 0.014134 |
| 216696_s_PROD2     | 0.02162   | 7.5E-06  | 0.000389 |
| 216708_x_LOC10028  | -0.01486  | 0.000115 | 0.002636 |
| 216714_at CCL13    | -0.00933  | 0.000153 | 0.003242 |
| 216733_s_GATM      | 0.011932  | 0.000161 | 0.003356 |
| 216781_at KIAA1751 | -0.00443  | 0.00261  | 0.02534  |
| 216806_at          | -0.00475  | 0.00035  | 0.005882 |
| 216823_at RPS3A    | -0.00622  | 6.42E-05 | 0.00172  |
| 216829_at IGK@     | -0.00578  | 0.001399 | 0.016264 |
| 216834_at RGS1     | -1.43E-02 | 0.000102 | 0.002406 |
| 216835_s_DOK1      | -0.00543  | 0.000711 | 0.009829 |
| 216865_at COL14A1  | -0.00896  | 0.00163  | 0.018179 |
| 216866_s_COL14A1   | -0.01159  | 0.000865 | 0.011371 |
| 216886_at CHRNA4   | 0.013616  | 1.92E-07 | 3.75E-05 |
| 216889_s_HNF4A     | 0.01113   | 0.000177 | 0.003584 |
| 216891_at          | -0.00393  | 0.002177 | 0.022245 |
| 216892_at IGHG1    | -0.00411  | 0.006365 | 0.046738 |
| 216903_s_CBARA1    | 0.011343  | 4.3E-06  | 0.00027  |
| 216906_at ST14     | -5.21E-03 | 0.0006   | 0.008674 |
| 216910_at XPNPEP2  | 0.038031  | 1.12E-10 | 8.3E-07  |
| 216911_s_HIC2      | -0.00406  | 0.002896 | 0.027278 |
| 216946_at HLA-DOA  | -0.0035   | 0.004617 | 0.037377 |
| 216951_at FCGR1A   | -0.00536  | 0.003371 | 0.030154 |
| 216955_at TAF1     | -0.00404  | 0.004781 | 0.038272 |
| 216962_at RPAIN    | 0.006521  | 0.000478 | 0.007392 |
| 216964_at USP22    | 0.007671  | 0.001167 | 0.014189 |
| 216984_x_IGLV2-23  | -0.01191  | 0.000806 | 0.010795 |
| 216985_s_STX3      | 0.006826  | 0.001017 | 0.012785 |
| 217014_s_AZGP1     | 0.027463  | 1.13E-06 | 0.000116 |
| 217023_x_TPSAB1    | -0.0142   | 3.79E-06 | 0.000246 |

|                   |          |          |          |
|-------------------|----------|----------|----------|
| 217028_at CXCR4   | -0.01973 | 2.23E-05 | 0.000791 |
| 217036_at         | -0.01087 | 0.000604 | 0.008702 |
| 217053_x_ETV1     | -0.00644 | 0.000362 | 0.006028 |
| 217061_s_ETV1     | -0.00521 | 0.002119 | 0.02181  |
| 217106_x_DIMT1L   | -0.00679 | 0.000181 | 0.003641 |
| 217133_x_CYP2B6   | 0.008405 | 0.002366 | 0.02359  |
| 217138_x_at       | -0.02325 | 0.001538 | 0.017444 |
| 217140_s_VDAC1    | 0.004338 | 0.002448 | 0.024172 |
| 217147_s_TRAT1    | -0.00735 | 0.004067 | 0.034265 |
| 217148_x_at       | -0.02054 | 0.000195 | 0.003843 |
| 217157_x_IGK@     | -0.01341 | 0.001599 | 0.017914 |
| 217167_x_GK       | 0.018462 | 2.63E-07 | 4.57E-05 |
| 217179_x_at       | -0.00939 | 0.00073  | 0.010055 |
| 217180_at         | -0.00788 | 0.000281 | 0.00499  |
| 217232_x_HBB      | -0.01953 | 0.000142 | 0.003096 |
| 217235_x_IGLL5    | -0.01587 | 0.000304 | 0.005295 |
| 217236_x_IGHA1    | -0.00532 | 0.002745 | 0.026289 |
| 217238_s_ALDOB    | 0.018844 | 3.91E-06 | 0.000253 |
| 217239_x_LOC10050 | -0.00833 | 0.001643 | 0.018282 |
| 217248_s_SLC7A8   | 2.34E-02 | 1.75E-06 | 0.000152 |
| 217256_x_at       | -0.00432 | 0.000266 | 0.0048   |
| 217257_at SH3BP2  | 0.012443 | 5.88E-06 | 0.000332 |
| 217260_x_IGHG1    | -0.01344 | 0.006216 | 0.045825 |
| 217281_x_IGHA1    | -0.01374 | 0.003795 | 0.032794 |
| 217284_x_SERHL2   | -0.00508 | 0.002409 | 0.023887 |
| 217288_at         | 0.009555 | 0.000146 | 0.003136 |
| 217290_at         | -0.00436 | 0.004254 | 0.035358 |
| 217309_s_DSCR3    | 0.007342 | 0.005809 | 0.043729 |
| 217313_at         | -0.00733 | 2.81E-06 | 0.000202 |
| 217319_x_CYP4A22  | 0.02164  | 1.17E-08 | 8.12E-06 |
| 217320_at         | -0.00755 | 0.002031 | 0.021215 |
| 217328_at         | -0.00631 | 7.79E-07 | 9.23E-05 |
| 217330_at DISC1   | -0.00404 | 0.005003 | 0.039483 |
| 217347_at         | -0.00443 | 0.002182 | 0.022263 |
| 217367_s_ZHX3     | 0.007168 | 0.006869 | 0.049012 |
| 217369_at IGHG1   | -0.00557 | 0.002897 | 0.027278 |
| 217375_at         | -0.00627 | 0.003184 | 0.028984 |
| 217378_x_at       | -0.01733 | 0.000727 | 0.010026 |
| 217388_s_KYNU     | 0.013101 | 6.49E-05 | 0.001731 |
| 217393_x_UBE2NL   | -0.0035  | 0.006352 | 0.046661 |
| 217414_x_HBA1     | -0.01876 | 0.000258 | 0.004693 |
| 217418_x_MS4A1    | -0.01693 | 9.16E-05 | 0.00223  |
| 217433_at TACC1   | 0.007628 | 0.002944 | 0.027494 |
| 217437_s_TACC1    | 0.008034 | 0.003574 | 0.031404 |
| 217455_s_SSTR2    | 0.007698 | 0.002641 | 0.02556  |
| 217480_x_IGKC     | -0.01258 | 0.004389 | 0.036077 |
| 217483_at FOLH1   | 0.017099 | 2.14E-07 | 4E-05    |
| 217487_x_FOLH1    | 0.012749 | 4.53E-05 | 0.001341 |
| 217489_s_IL6R     | 0.008937 | 0.000558 | 0.008267 |
| 217501_at CIAO1   | 0.006875 | 0.004323 | 0.035763 |
| 217503_at STK17B  | -0.01354 | 0.000193 | 0.003803 |
| 217511_at KAZALD1 | -0.00477 | 0.003586 | 0.031479 |
| 217512_at KNG1    | 0.01331  | 0.00046  | 0.007203 |



|                    |           |          |          |
|--------------------|-----------|----------|----------|
| 217513_at C17orf60 | -0.00587  | 0.002241 | 0.022667 |
| 217526_at NFATC2IP | 0.006206  | 0.005172 | 0.040319 |
| 217530_at SLC34A1  | 2.20E-02  | 3.06E-07 | 5.09E-05 |
| 217534_at FAM49B   | -0.00551  | 0.004407 | 0.036135 |
| 217547_x_ZNF675    | -4.62E-03 | 0.004498 | 0.036636 |
| 217553_at MGC87042 | -0.00583  | 0.000965 | 0.0123   |
| 217555_at SMC1A    | 0.006805  | 0.000138 | 0.003022 |
| 217557_s_CPM       | 0.00872   | 8.65E-05 | 0.002135 |
| 217583_at PAH      | 0.013016  | 0.001167 | 0.014189 |
| 217599_s_MDFIC     | -0.0052   | 0.001118 | 0.013745 |
| 217605_at USP27X   | 0.004159  | 0.006093 | 0.045231 |
| 217612_at TIMM50   | 0.00653   | 0.003926 | 0.033507 |
| 217625_x_at        | 0.007895  | 0.004496 | 0.036635 |
| 217629_at          | -0.00736  | 0.000839 | 0.01114  |
| 217632_at GNL3L    | 0.007053  | 0.001804 | 0.019536 |
| 217647_at          | 0.007474  | 0.002599 | 0.02526  |
| 217648_at          | -0.00589  | 0.00615  | 0.045503 |
| 217687_at ADCY2    | -0.00456  | 0.001986 | 0.020951 |
| 217707_x_SMARCA2   | -0.00761  | 0.003933 | 0.033539 |
| 217718_s_YWHAB     | -0.00237  | 0.005422 | 0.041695 |
| 217728_at S100A6   | -0.0139   | 1.14E-06 | 0.000116 |
| 217733_s_TMSB10    | -1.17E-02 | 0.002764 | 0.026452 |
| 217749_at COPG     | 0.005651  | 0.002536 | 0.024815 |
| 217751_at GSTK1    | 0.005412  | 0.003168 | 0.028888 |
| 217752_s_CNDP2     | 0.005302  | 7.02E-05 | 0.001835 |
| 217755_at HN1      | -0.00625  | 0.005242 | 0.040771 |
| 217762_s_RAB31     | -8.49E-03 | 0.001357 | 0.015906 |
| 217767_at C3       | -0.01617  | 0.00083  | 0.011049 |
| 217772_s_MTCH2     | 0.0056    | 0.002585 | 0.025165 |
| 217775_s_RDH11     | 0.005949  | 0.000242 | 0.004488 |
| 217781_s_ZFP106    | 0.007424  | 0.003966 | 0.033701 |
| 217786_at PRMT5    | 0.006102  | 0.005788 | 0.043591 |
| 217788_s_GALNT2    | 0.006865  | 0.001323 | 0.015612 |
| 217792_at SNX5     | 0.004781  | 0.006855 | 0.048931 |
| 217796_s_NPLOC4    | 0.009552  | 3.05E-05 | 0.000991 |
| 217808_s_MAPKAP1   | 0.005627  | 0.004405 | 0.036135 |
| 217809_at BZW2     | -0.00547  | 0.001602 | 0.01792  |
| 217820_s_ENAH      | -0.00725  | 0.001866 | 0.019981 |
| 217821_s_WBP11     | 0.007785  | 0.000514 | 0.007778 |
| 217823_s_UBE2J1    | -0.00475  | 0.004172 | 0.034886 |
| 217824_at UBE2J1   | -0.00568  | 0.006969 | 0.049507 |
| 217838_s_EVL       | -0.00762  | 8.4E-05  | 0.002093 |
| 217849_s_CDC42BPI  | 0.006026  | 0.002709 | 0.026049 |
| 217850_at GNL3     | -0.00652  | 0.000413 | 0.00664  |
| 217853_at TNS3     | 7.43E-03  | 0.000432 | 0.006863 |
| 217866_at CPSF7    | 0.005962  | 5.55E-05 | 0.001561 |
| 217874_at SUCLG1   | 0.010563  | 3.01E-06 | 0.000209 |
| 217889_s_CYBRD1    | -0.00894  | 0.004389 | 0.036077 |
| 217900_at IARS2    | 0.005692  | 0.001769 | 0.019313 |
| 217904_s_BACE1     | 0.005787  | 0.002778 | 0.026545 |
| 217911_s_BAG3      | 0.010133  | 0.000169 | 0.003479 |
| 217914_at TPCN1    | 0.010473  | 6.75E-06 | 0.000362 |
| 217915_s_RSL24D1   | -0.00678  | 0.000122 | 0.002755 |

|                    |           |          |          |
|--------------------|-----------|----------|----------|
| 217916_s_FAM49B    | -0.00712  | 0.000335 | 0.005697 |
| 217925_s_C6orf106  | 0.006582  | 0.000186 | 0.003708 |
| 217933_s_LAP3      | 0.005609  | 0.001499 | 0.017139 |
| 217935_s_UQCC      | 0.006504  | 0.002434 | 0.024082 |
| 217939_s_AFTPH     | 0.005136  | 0.001207 | 0.014589 |
| 217944_at_POMGNT1  | 0.004144  | 0.004378 | 0.036026 |
| 217959_s_TRAPPC4   | 0.009757  | 0.005459 | 0.041777 |
| 217964_at_TTC19    | 0.00507   | 0.001353 | 0.01587  |
| 217973_at_DCXR     | 0.015672  | 2.8E-05  | 0.000938 |
| 217974_at_TM7SF3   | 0.010832  | 0.006922 | 0.049268 |
| 217977_at_SEPX1    | 0.011096  | 0.000447 | 0.007043 |
| 217979_at_TSPAN13  | -0.01104  | 0.000232 | 0.00435  |
| 217986_s_BAZ1A     | -0.01044  | 0.000126 | 0.002827 |
| 217990_at_GMPR2    | 0.007664  | 0.003934 | 0.033539 |
| 218002_s_CXCL14    | 0.01116   | 0.000253 | 0.004639 |
| 218019_s_PDXK      | 0.009534  | 9.42E-05 | 0.002274 |
| 218021_at_DHRS4    | 0.016508  | 8.53E-05 | 0.002116 |
| 218022_at_VRK3     | 0.007448  | 0.002969 | 0.027607 |
| 218025_s_PECI      | 0.010242  | 5.59E-05 | 0.001569 |
| 218035_s_RBM47     | 0.005866  | 0.002359 | 0.02356  |
| 218037_at_FAM134A  | 0.006063  | 0.005682 | 0.042991 |
| 218066_at_SLC12A7  | 0.006842  | 2.54E-05 | 0.000873 |
| 218067_s_ARGLU1    | -6.14E-03 | 0.006047 | 0.045037 |
| 218068_s_ZNF672    | 0.00618   | 0.000874 | 0.011434 |
| 218070_s_GMPPA     | 0.00638   | 0.005234 | 0.040738 |
| 218084_x_FXYD5     | -0.01169  | 0.002049 | 0.021309 |
| 218086_at_NPDC1    | -0.00843  | 5.87E-05 | 0.001615 |
| 218094_s_DBNDD2    | -0.00773  | 0.001948 | 0.020633 |
| 218099_at_TEX2     | 0.007274  | 0.000239 | 0.004439 |
| 218102_at_DERA     | 0.006862  | 0.000212 | 0.004085 |
| 218103_at_FTSJ3    | 4.59E-03  | 0.000416 | 0.006678 |
| 218124_at_RETSAT   | 0.010357  | 9.2E-08  | 2.66E-05 |
| 218126_at_FAM82A2  | 0.005424  | 0.002874 | 0.02717  |
| 218162_at_OLFML3   | -0.00739  | 0.005373 | 0.04145  |
| 218165_at_MEAF6    | -0.00456  | 0.003252 | 0.029525 |
| 218168_s_ADCK3     | 0.009191  | 0.000145 | 0.003135 |
| 218192_at_IP6K2    | -0.00609  | 8.44E-06 | 0.000417 |
| 218204_s_FYCO1     | 0.005827  | 0.001405 | 0.016304 |
| 218211_s_MLPH      | -0.00782  | 0.00471  | 0.037841 |
| 218219_s_LANCL2    | 0.008821  | 0.001055 | 0.01319  |
| 218223_s_PLEKHO1   | -0.00643  | 0.001248 | 0.014954 |
| 218232_at_C1QA     | -0.01053  | 5.79E-05 | 0.00161  |
| 218245_at_TSKU     | 0.014605  | 5.85E-09 | 6.19E-06 |
| 218264_at_BCCIP    | 0.006839  | 0.001361 | 0.015951 |
| 218272_at_TTC38    | 0.011968  | 4.91E-06 | 0.000293 |
| 218275_at_SLC25A10 | 0.007626  | 0.00055  | 0.00818  |
| 218285_s_BDH2      | 6.43E-03  | 0.00063  | 0.008974 |
| 218288_s_CCDC90B   | -0.00416  | 0.005171 | 0.040319 |
| 218298_s_C14orf159 | 0.005354  | 0.001785 | 0.019418 |
| 218307_at_RSAD1    | 0.005606  | 0.004352 | 0.035907 |
| 218308_at_TACC3    | -0.00488  | 0.000859 | 0.011319 |
| 218313_s_GALNT7    | -0.00641  | 0.003008 | 0.027878 |
| 218322_s_ACSL5     | -0.00592  | 0.004571 | 0.037081 |

|                    |          |          |          |
|--------------------|----------|----------|----------|
| 218328_at COQ4     | 0.005571 | 0.005761 | 0.043463 |
| 218329_at PRDM4    | 0.0075   | 0.002706 | 0.026024 |
| 218345_at TMEM176  | 0.011186 | 0.000292 | 0.005143 |
| 218353_at RGS5     | -0.00698 | 0.006204 | 0.045781 |
| 218365_s_DARS2     | 0.009117 | 0.003358 | 0.030132 |
| 218375_at NUDT9    | 0.007388 | 0.000847 | 0.011199 |
| 218380_at LOC72839 | -0.00779 | 0.000488 | 0.007482 |
| 218392_x_SFXN1     | 0.006531 | 0.001434 | 0.016555 |
| 218440_at MCCC1    | 0.007239 | 9.1E-05  | 0.002226 |
| 218445_at H2AFY2   | -0.00585 | 0.000329 | 0.005628 |
| 218455_at NFS1     | 0.007363 | 0.000119 | 0.002691 |
| 218465_at TMEM33   | 0.005257 | 0.003636 | 0.031765 |
| 218469_at GREM1    | -0.00907 | 0.005458 | 0.041777 |
| 218487_at ALAD     | 0.014481 | 2.37E-07 | 4.29E-05 |
| 218489_s_ALAD      | 0.012302 | 0.000106 | 0.002464 |
| 218499_at MST4     | -0.01058 | 0.000388 | 0.006347 |
| 218502_s_TRPS1     | 0.005834 | 0.00246  | 0.024263 |
| 218505_at WDR59    | 4.99E-03 | 0.001676 | 0.018509 |
| 218510_x_FAM134B   | 0.008771 | 0.000147 | 0.003149 |
| 218511_s_PNPO      | 0.008795 | 0.000415 | 0.006665 |
| 218523_at LHPP     | 0.008782 | 0.00093  | 0.011972 |
| 218533_s_UCKL1     | 0.005243 | 0.006968 | 0.049507 |
| 218546_at C1orf115 | 0.009286 | 0.000131 | 0.002901 |
| 218547_at DHDDS    | 0.004792 | 0.000874 | 0.011434 |
| 218552_at ECHDC2   | 0.008585 | 2.08E-05 | 0.000757 |
| 218557_at NIT2     | 8.57E-03 | 0.000856 | 0.011292 |
| 218565_at C9orf114 | 0.006863 | 0.001997 | 0.021039 |
| 218567_x_DPP3      | 0.004954 | 0.004869 | 0.038793 |
| 218596_at TBC1D13  | 0.012172 | 7.94E-06 | 0.000397 |
| 218597_s_CISD1     | 0.004199 | 0.002496 | 0.024513 |
| 218600_at LIMD2    | -0.00845 | 7.76E-06 | 0.000395 |
| 218601_at URGCP    | 0.004694 | 0.006506 | 0.047378 |
| 218610_s_CPPED1    | 0.007483 | 0.000238 | 0.004438 |
| 218611_at IER5     | -0.0074  | 0.004067 | 0.034265 |
| 218614_at C12orf35 | -0.00767 | 0.001858 | 0.019923 |
| 218632_at HECTD3   | 0.004468 | 0.001445 | 0.016664 |
| 218633_x_ABHD10    | 0.007236 | 0.001489 | 0.017061 |
| 218646_at C4orf27  | -0.00415 | 0.002278 | 0.022951 |
| 218656_s_LHFP      | -0.01505 | 1.09E-06 | 0.000114 |
| 218658_s_ACTR8     | 0.007138 | 0.000744 | 0.010169 |
| 218661_at NAT15    | 0.010023 | 1.59E-05 | 0.000623 |
| 218663_at NCAPG    | -0.00541 | 0.004048 | 0.034142 |
| 218665_at FZD4     | 0.011334 | 7.75E-06 | 0.000395 |
| 218667_at PJA1     | -0.00702 | 0.000281 | 0.004998 |
| 218677_at S100A14  | -0.00639 | 0.003274 | 0.02965  |
| 218684_at LRRC8D   | 0.005977 | 0.001214 | 0.014663 |
| 218693_at TSPAN15  | -0.00641 | 0.000179 | 0.003618 |
| 218699_at RAB7L1   | 0.009819 | 0.000132 | 0.002901 |
| 218700_s_RAB7L1    | 0.010758 | 0.000621 | 0.008874 |
| 218716_x_MTO1      | 0.006288 | 0.000791 | 0.010686 |
| 218756_s_DHRS11    | 0.00985  | 0.000862 | 0.011353 |
| 218760_at COQ6     | 0.006257 | 0.000884 | 0.011523 |
| 218773_s_MSRB2     | 0.006478 | 0.004552 | 0.036969 |

|                    |          |          |          |
|--------------------|----------|----------|----------|
| 218777_at REEP4    | -0.00436 | 0.006105 | 0.04529  |
| 218799_at GPN2     | 5.57E-03 | 0.000582 | 0.008503 |
| 218802_at CCDC109E | -0.00914 | 0.000673 | 0.00947  |
| 218805_at GIMAP5   | -0.00768 | 0.005397 | 0.041551 |
| 218842_at RPAP3    | -0.00534 | 0.00061  | 0.008766 |
| 218843_at FNDC4    | -0.00434 | 0.002145 | 0.022005 |
| 218844_at ACSF2    | 0.018117 | 2.59E-08 | 1.37E-05 |
| 218845_at DUSP22   | -0.00714 | 0.000504 | 0.007653 |
| 218848_at THOC6    | -0.00423 | 0.002713 | 0.026077 |
| 218854_at DSE      | -0.00887 | 0.001545 | 0.017479 |
| 218855_at TPRA1    | -0.00469 | 0.001668 | 0.01848  |
| 218856_at TNFRSF21 | 0.015652 | 7.53E-05 | 0.001932 |
| 218857_s_ASRGL1    | 0.01043  | 0.001159 | 0.014121 |
| 218858_at DEPDC6   | -0.00728 | 0.001249 | 0.014954 |
| 218862_at ASB13    | 0.009884 | 0.001367 | 0.015975 |
| 218870_at ARHGAP1  | -0.01733 | 2.7E-05  | 0.000916 |
| 218872_at TESC     | -0.01313 | 7.02E-07 | 8.67E-05 |
| 218883_s_MLF1IP    | -0.006   | 0.002255 | 0.022768 |
| 218884_s_GUF1      | 0.005601 | 0.005996 | 0.044808 |
| 218893_at ISOC2    | 0.008968 | 0.000393 | 0.006416 |
| 218913_s_GMIP      | -0.00498 | 0.003342 | 0.030067 |
| 218920_at FAM193B  | -0.00507 | 0.000827 | 0.01102  |
| 218921_at SIGIRR   | 0.008525 | 0.000175 | 0.003557 |
| 218927_s_CHST12    | -0.00488 | 0.002878 | 0.02717  |
| 218928_s_SLC37A1   | -0.00564 | 0.002486 | 0.024458 |
| 218931_at RAB17    | 0.005962 | 0.00089  | 0.01157  |
| 218952_at PCSK1N   | 0.011283 | 0.004258 | 0.035377 |
| 218957_s_PAAF1     | 0.010202 | 0.000191 | 0.003792 |
| 218959_at HOXC10   | 0.005666 | 0.001754 | 0.019175 |
| 218960_at TMPRSS4  | -0.01102 | 0.00031  | 0.005383 |
| 218976_at DNAJC12  | 0.010311 | 0.001854 | 0.019915 |
| 218980_at FHOD3    | 0.007659 | 0.00051  | 0.007732 |
| 218983_at C1RL     | -0.01024 | 1.98E-05 | 0.000726 |
| 219013_at GALNT11  | 0.006411 | 0.000378 | 0.006201 |
| 219014_at PLAC8    | -0.01394 | 0.000347 | 0.00585  |
| 219016_at FASTKD5  | 0.008378 | 0.002803 | 0.026669 |
| 219021_at RNF121   | 0.005116 | 0.005828 | 0.043821 |
| 219028_at HIPK2    | 0.00534  | 0.000249 | 0.004585 |
| 219049_at CSGALNA  | -0.00921 | 0.000859 | 0.011319 |
| 219054_at C5orf23  | 0.014572 | 4.81E-05 | 0.001412 |
| 219056_at RNASEH2  | -0.00708 | 0.000587 | 0.008537 |
| 219076_s_PXMP2     | 0.012109 | 4.1E-06  | 0.000263 |
| 219081_at ANKHD1   | 0.003974 | 0.002751 | 0.026338 |
| 219111_s_DDX54     | 0.004491 | 0.001885 | 0.020122 |
| 219113_x_HSD17B14  | 0.008628 | 0.00066  | 0.009315 |
| 219123_at ZNF232   | 0.004791 | 0.005732 | 0.043296 |
| 219140_s_RBP4      | 0.022251 | 1.11E-05 | 0.000498 |
| 219144_at DUSP26   | 0.006569 | 0.004467 | 0.036481 |
| 219159_s_SLAMF7    | -0.02482 | 0.000509 | 0.007719 |
| 219161_s_CKLF      | -0.01275 | 1.5E-07  | 3.34E-05 |
| 219176_at C2orf47  | 5.40E-03 | 0.003498 | 0.030956 |
| 219180_s_PEX26     | 0.00582  | 6.52E-05 | 0.001736 |
| 219183_s_CYTH4     | -0.00813 | 0.000179 | 0.003611 |

|                     |          |          |          |
|---------------------|----------|----------|----------|
| 219188_s_MACROD1    | 0.008169 | 0.000138 | 0.003017 |
| 219190_s_EIF2C4     | -0.00583 | 0.000988 | 0.012516 |
| 219191_s_BIN2       | -0.01098 | 3.19E-06 | 0.000218 |
| 219194_at_SEMA4G    | 0.0112   | 2.11E-06 | 0.000168 |
| 219215_s_SLC39A4    | 0.013792 | 2.3E-06  | 0.000177 |
| 219222_at_RBKS      | 0.006296 | 0.004352 | 0.035907 |
| 219228_at_ZNF331    | 0.008728 | 0.000531 | 0.007967 |
| 219235_s_PHACTR4    | 0.007183 | 0.006422 | 0.047012 |
| 219238_at_PIGV      | 0.005029 | 0.004542 | 0.036912 |
| 219243_at_GIMAP4    | -0.0106  | 1.41E-05 | 0.000586 |
| 219255_x_IL17RB     | 0.01257  | 0.000232 | 0.00435  |
| 219261_at_C7orf26   | 0.004485 | 0.003948 | 0.033568 |
| 219268_at_ETNK2     | 0.01582  | 6.83E-07 | 8.55E-05 |
| 219277_s_OGDHL      | 0.012725 | 1.08E-05 | 0.000492 |
| 219279_at_DOCK10    | -0.01228 | 0.000607 | 0.008738 |
| 219281_at_MSRA      | 0.01743  | 6.67E-09 | 6.19E-06 |
| 219295_s_PCOLCE2    | 0.014516 | 0.001656 | 0.018384 |
| 219298_at_ECHDC3    | 0.010572 | 0.000129 | 0.002852 |
| 219307_at_PDSS2     | 0.006346 | 0.002722 | 0.026122 |
| 219320_at_MYO19     | -0.00515 | 0.000596 | 0.008625 |
| 219340_s_CLN8       | 0.011355 | 1.7E-05  | 0.000651 |
| 219341_at_CLN8      | 0.01541  | 7.93E-07 | 9.25E-05 |
| 219359_at_ATHL1     | -0.00973 | 9.05E-05 | 0.002216 |
| 219377_at_FAM59A    | 0.006521 | 0.002347 | 0.023484 |
| 219385_at_SLAMF8    | -0.00543 | 0.001752 | 0.019159 |
| 219386_s_SLAMF8     | -0.01216 | 2.33E-05 | 0.000818 |
| 219387_at_CCDC88A   | -0.00632 | 0.003877 | 0.033245 |
| 219414_at_CLSTN2    | 0.011509 | 0.000583 | 0.00851  |
| 219418_at_NHEJ1     | 0.006346 | 0.003078 | 0.028326 |
| 219420_s_C1orf163   | 0.008676 | 0.004938 | 0.03909  |
| 219440_at_RAI2      | -0.00946 | 0.0003   | 0.005241 |
| 219460_s_TMEM127    | 0.006445 | 0.006651 | 0.048054 |
| 219462_at_TMEM53    | 0.004615 | 0.002625 | 0.025437 |
| 219467_at_GIN1      | -0.00534 | 0.004481 | 0.036543 |
| 219471_at_C13orf18  | -0.01039 | 4.69E-05 | 0.001383 |
| 219492_at_CHIC2     | -0.00389 | 0.004793 | 0.038321 |
| 219496_at_ANKRD57   | 0.007843 | 0.006573 | 0.047698 |
| 219498_s_BCL11A     | -0.00993 | 0.000236 | 0.004401 |
| 219505_at_CECR1     | -0.01043 | 0.006304 | 0.046393 |
| 219506_at_C1orf54   | -0.00835 | 0.000576 | 0.00844  |
| 219511_s_SNCAIP     | -0.0116  | 0.000223 | 0.004232 |
| 219525_at_SLC47A1   | 0.016514 | 2.44E-05 | 0.00085  |
| 219527_at_MOSC2     | 0.017683 | 8.97E-10 | 2.2E-06  |
| 219528_s_BCL11B     | -0.00833 | 0.000659 | 0.009309 |
| 219540_at_ZNF267    | -0.00838 | 0.002014 | 0.021129 |
| 219550_at_ROBO3     | -0.00739 | 0.000313 | 0.005401 |
| 219551_at_EAF2      | 0.013981 | 7.26E-05 | 0.001884 |
| 219554_at_RHCG      | 0.014358 | 0.000249 | 0.004583 |
| 219558_at_ATP13A3   | 0.007092 | 5.41E-05 | 0.00153  |
| 219563_at_C14orf139 | 0.01019  | 4.41E-05 | 0.001316 |
| 219574_at_MARCH1    | -0.01025 | 0.000254 | 0.004639 |
| 219575_s_COG8       | 0.004998 | 0.001955 | 0.020655 |
| 219582_at_OGFRL1    | -0.00895 | 0.000276 | 0.00493  |

|                    |           |          |          |
|--------------------|-----------|----------|----------|
| 219594_at NINJ2    | -0.00902  | 7.89E-06 | 0.000397 |
| 219595_at LOC10028 | -0.00515  | 0.00305  | 0.028158 |
| 219607_s_MS4A4A    | -0.01331  | 0.00037  | 0.0061   |
| 219610_at RGNEF    | 0.006848  | 0.003495 | 0.030956 |
| 219613_s_SIRT6     | -0.00383  | 0.007047 | 0.049812 |
| 219615_s_KCNK5     | 0.014529  | 5.87E-05 | 0.001615 |
| 219616_at ACSS3    | 0.012011  | 1.48E-05 | 0.000603 |
| 219625_s_COL4A3BF  | 9.44E-03  | 0.000251 | 0.00461  |
| 219627_at ZNF767   | -5.82E-03 | 0.004042 | 0.034122 |
| 219630_at PDZK1IP1 | 0.017999  | 2.08E-05 | 0.000757 |
| 219632_s_TRPV1     | 1.18E-02  | 2.56E-06 | 0.000188 |
| 219655_at C7orf10  | 0.014123  | 3.27E-06 | 0.000222 |
| 219664_s_DECR2     | 7.25E-03  | 0.003544 | 0.03122  |
| 219666_at MS4A6A   | -0.01653  | 3.39E-05 | 0.001067 |
| 219684_at RTP4     | -0.01063  | 2.5E-05  | 0.000865 |
| 219700_at PLXDC1   | -0.00957  | 0.001373 | 0.016003 |
| 219705_at QSER1    | -0.00782  | 6.79E-06 | 0.000363 |
| 219713_at SHPK     | 0.00645   | 0.000648 | 0.00917  |
| 219718_at FGGY     | 7.48E-03  | 0.000348 | 0.005858 |
| 219722_s_GDPD3     | 0.009997  | 0.000365 | 0.006064 |
| 219723_x_AGPAT3    | 0.013378  | 2.13E-06 | 0.000168 |
| 219731_at CC2D2B   | 0.006127  | 0.00129  | 0.015311 |
| 219732_at LPPR1    | 0.018016  | 4.9E-05  | 0.001435 |
| 219737_s_PCDH9     | 0.007684  | 0.002658 | 0.025664 |
| 219739_at RNF186   | 0.021708  | 3.15E-08 | 1.57E-05 |
| 219744_at FN3K     | 0.017955  | 2.04E-05 | 0.000747 |
| 219747_at C4orf31  | 0.015743  | 0.000644 | 0.009132 |
| 219748_at TREML2   | -0.00466  | 0.000884 | 0.011523 |
| 219773_at NOX4     | 0.016314  | 5.85E-05 | 0.001614 |
| 219777_at GIMAP6   | -0.00554  | 0.00567  | 0.04293  |
| 219785_s_LOC10028  | 0.009345  | 0.000805 | 0.010788 |
| 219789_at NPR3     | 1.78E-02  | 1.35E-05 | 0.000567 |
| 219790_s_NPR3      | 0.014198  | 5.09E-05 | 0.001469 |
| 219796_s_CDHR5     | 0.014699  | 4.65E-06 | 0.000284 |
| 219799_s_DHRS9     | -0.00682  | 8.65E-05 | 0.002135 |
| 219803_at ANGPTL3  | 0.025732  | 1.6E-07  | 3.4E-05  |
| 219812_at PVRIG    | -0.00558  | 0.004332 | 0.03581  |
| 219840_s_TCL6      | 0.012367  | 7.41E-06 | 0.000387 |
| 219850_s_EHF       | -0.01031  | 0.00218  | 0.022259 |
| 219855_at NUDT11   | -0.00638  | 0.003274 | 0.02965  |
| 219866_at CLIC5    | 0.012384  | 0.002492 | 0.024498 |
| 219867_at CHODL    | -0.01004  | 0.000285 | 0.00505  |
| 219868_s_ANKFY1    | 0.00716   | 0.005169 | 0.040319 |
| 219872_at FAM198B  | -0.00772  | 0.006385 | 0.046832 |
| 219873_at COLEC11  | 0.012911  | 3.75E-06 | 0.000245 |
| 219885_at SLFN12   | -0.00683  | 0.001107 | 0.013682 |
| 219890_at CLEC5A   | -0.00712  | 0.000741 | 0.010156 |
| 219891_at PGPEP1   | 0.013857  | 1.58E-07 | 3.38E-05 |
| 219902_at BHMT2    | 0.018792  | 6.59E-09 | 6.19E-06 |
| 219915_s_SLC16A10  | 0.018809  | 1.4E-07  | 3.26E-05 |
| 219922_s_LTBP3     | -0.00382  | 0.006436 | 0.047086 |
| 219923_at TRIM45   | -0.005    | 0.004572 | 0.037081 |
| 219947_at CLEC4A   | -0.00942  | 6.62E-06 | 0.000358 |

|                    |          |          |          |
|--------------------|----------|----------|----------|
| 219954_s_GBA3      | 0.014477 | 2.72E-05 | 0.000921 |
| 219959_at_MOCOS    | -0.00704 | 0.000645 | 0.009136 |
| 219962_at_ACE2     | 0.015938 | 4.93E-05 | 0.001441 |
| 219970_at_GIPC2    | 0.014537 | 0.000152 | 0.003234 |
| 219986_s_ACAD10    | 0.010503 | 2.38E-06 | 0.000181 |
| 219987_at_LOC10028 | 0.006881 | 0.002363 | 0.023582 |
| 219991_at_SLC2A9   | 0.013496 | 6.73E-05 | 0.00178  |
| 219996_at_ASB7     | 0.004094 | 0.006828 | 0.04878  |
| 219998_at_HSPC159  | 0.007065 | 0.000574 | 0.008435 |
| 220002_at_KIF26B   | -0.00745 | 0.000163 | 0.003383 |
| 220005_at_P2RY13   | -0.00964 | 0.000251 | 0.00461  |
| 220009_at_LONRF3   | 0.010319 | 2.9E-05  | 0.000959 |
| 220017_x_CYP2C9    | -0.00551 | 0.005771 | 0.043494 |
| 220020_at_XPNPEP3  | 0.009373 | 2.65E-05 | 0.000903 |
| 220038_at_C8orf44  | 0.008083 | 0.005274 | 0.040922 |
| 220055_at_ZNF287   | -0.00567 | 0.000844 | 0.011167 |
| 220061_at_ACSM5    | 0.021446 | 4.34E-08 | 1.79E-05 |
| 220066_at_NOD2     | -0.00519 | 0.00661  | 0.047901 |
| 220072_at_CSPP1    | 0.004651 | 0.003353 | 0.030105 |
| 220074_at_CDHR5    | 0.008363 | 0.000156 | 0.003279 |
| 220075_s_CDHR5     | 0.031805 | 7.52E-09 | 6.44E-06 |
| 220089_at_L2HGDH   | 0.006939 | 0.002892 | 0.027262 |
| 220094_s_CCDC90A   | 0.007507 | 5.61E-05 | 0.001572 |
| 220097_s_TMEM104   | 0.006139 | 0.005527 | 0.042142 |
| 220100_at_SLC22A11 | 0.020509 | 9.88E-07 | 0.000108 |
| 220116_at_KCNN2    | 0.008882 | 0.006546 | 0.04755  |
| 220119_at_EPB41L4A | 0.008016 | 0.000297 | 0.005209 |
| 220120_s_EPB41L4A  | 0.006467 | 0.00327  | 0.02965  |
| 220132_s_CLEC2D    | -0.01159 | 0.000141 | 0.003069 |
| 220135_s_SLC7A9    | 0.027585 | 7.1E-09  | 6.32E-06 |
| 220139_at_DNMT3L   | 0.00812  | 0.003912 | 0.033424 |
| 220146_at_TLR7     | -0.00984 | 0.000133 | 0.00293  |
| 220148_at_ALDH8A1  | 0.015642 | 2.23E-05 | 0.000793 |
| 220149_at_C2orf54  | 0.016667 | 0.000157 | 0.0033   |
| 220151_at_C19orf73 | -0.00415 | 0.005577 | 0.042391 |
| 220156_at_EFCAB1   | -0.00633 | 0.00036  | 0.006003 |
| 220165_at_INO80D   | 0.008456 | 0.004968 | 0.039263 |
| 220178_at_C19orf28 | 0.012892 | 8.31E-08 | 2.62E-05 |
| 220179_at_DPEP3    | -0.00602 | 0.00468  | 0.037714 |
| 220183_s_NUDT6     | 0.004424 | 0.004712 | 0.037842 |
| 220186_s_CDHR2     | 1.89E-02 | 1.83E-10 | 9.93E-07 |
| 220187_at_STEAP4   | -0.00992 | 0.004095 | 0.034372 |
| 220230_s_CYB5R2    | -0.00504 | 0.002735 | 0.026221 |
| 220233_at_FBXO17   | 0.011419 | 0.000773 | 0.010512 |
| 220234_at_CA8      | 6.27E-03 | 0.002421 | 0.023963 |
| 220236_at_PDPR     | 1.09E-02 | 0.000205 | 0.003977 |
| 220280_s_ANKMY1    | -0.00483 | 0.002044 | 0.021283 |
| 220297_at_BTBD7    | 0.008143 | 0.000142 | 0.003084 |
| 220303_at_PDZD3    | 1.12E-02 | 2.98E-05 | 0.000975 |
| 220310_at_TUBAL3   | 0.019582 | 9.03E-07 | 0.000101 |
| 220329_s_RMND1     | 0.006316 | 0.003588 | 0.03148  |
| 220330_s_SAMSN1    | -0.01652 | 8.3E-06  | 0.000412 |
| 220333_at_PAQR5    | 0.010064 | 0.000784 | 0.010637 |

|                    |           |          |          |
|--------------------|-----------|----------|----------|
| 220357_s_SGK2      | 0.005979  | 0.003947 | 0.033568 |
| 220358_at_BATF3    | -0.00577  | 0.001309 | 0.015488 |
| 220376_at_LRRC19   | 0.012226  | 0.000249 | 0.004584 |
| 220382_s_ARHGAP2   | 0.016083  | 7.64E-07 | 9.15E-05 |
| 220387_s_HHLA3     | 0.0082    | 0.000185 | 0.003692 |
| 220418_at_UBASH3A  | -0.00537  | 0.000532 | 0.007985 |
| 220421_at_BTNL8    | -5.08E-03 | 0.00258  | 0.025141 |
| 220424_at_NPHS2    | 0.01682   | 0.00108  | 0.013413 |
| 220441_at_DNAJC22  | 0.01114   | 0.000132 | 0.002908 |
| 220448_at_KCNK12   | -0.00508  | 0.003989 | 0.033831 |
| 220479_at_CPS1-IT  | -0.00423  | 0.004228 | 0.035222 |
| 220505_at_C9orf53  | -0.00343  | 0.006995 | 0.04956  |
| 220507_s_UPB1      | 0.025485  | 4.17E-08 | 1.79E-05 |
| 220511_s_DLC1      | -0.00424  | 0.003834 | 0.033004 |
| 220554_at_SLC22A7  | 0.010655  | 2.37E-05 | 0.000828 |
| 220560_at_C11orf21 | -0.00886  | 5.57E-06 | 0.000321 |
| 220567_at_IKZF2    | -0.00653  | 0.003926 | 0.033507 |
| 220577_at_GVINP1   | -0.00896  | 0.002858 | 0.027073 |
| 220591_s_EFHC2     | -0.01017  | 8.51E-06 | 0.00042  |
| 220604_x_FTCD      | 0.023358  | 5.62E-09 | 6.19E-06 |
| 220607_x_TH1L      | 0.008111  | 0.000395 | 0.006428 |
| 220614_s_C6orf103  | -0.00527  | 0.00039  | 0.006373 |
| 220642_x_GPR89A    | 0.012988  | 2.83E-07 | 4.82E-05 |
| 220658_s_ARNTL2    | -0.00604  | 0.006408 | 0.046926 |
| 220671_at_CCRN4L   | 0.012748  | 2.29E-05 | 0.000805 |
| 220675_s_PNPLA3    | 0.009008  | 0.000363 | 0.006045 |
| 220677_s_ADAMTS8   | -0.00559  | 4.61E-05 | 0.001363 |
| 220692_at          | 0.005888  | 0.001953 | 0.020654 |
| 220707_s_FOXRED2   | 0.005924  | 0.006039 | 0.045014 |
| 220715_at          | -0.00437  | 0.005155 | 0.04028  |
| 220724_at_CWH43    | 0.010161  | 0.003891 | 0.033326 |
| 220727_at_KCNK10   | 0.015503  | 6.48E-08 | 2.33E-05 |
| 220731_s_NECAP2    | -0.0033   | 0.00662  | 0.047944 |
| 220736_at_SLC19A3  | 0.00884   | 0.002266 | 0.022859 |
| 220738_s_RPS6KA6   | 0.008131  | 0.000368 | 0.006074 |
| 220740_s_SLC12A6   | 0.014661  | 6.2E-10  | 1.73E-06 |
| 220753_s_CRYL1     | 0.014441  | 4.39E-06 | 0.000274 |
| 220773_s_GPHN      | 0.015776  | 8.56E-07 | 9.74E-05 |
| 220801_s_HAO2      | 0.024621  | 6.23E-07 | 8.02E-05 |
| 220812_s_HHLA2     | 0.012099  | 0.000587 | 0.008537 |
| 220819_at_FRMD1    | 0.006536  | 0.004464 | 0.036467 |
| 220865_s_PDSS1     | 0.00739   | 0.004784 | 0.038278 |
| 220892_s_PSAT1     | 0.023191  | 1E-06    | 0.000108 |
| 220930_s_MGC5590   | 0.009409  | 0.000103 | 0.002413 |
| 220931_at_MGC5590  | 0.009326  | 0.000153 | 0.003242 |
| 220939_s_DPP8      | 0.005006  | 0.003941 | 0.03354  |
| 220940_at_ANKRD36l | -0.00953  | 0.005089 | 0.039976 |
| 220951_s_A1CF      | 0.02096   | 5.54E-06 | 0.000321 |
| 220977_x_EPB41L5   | 0.00855   | 0.001069 | 0.013308 |
| 220988_s_C1QTNF3   | -0.0105   | 0.000417 | 0.006684 |
| 221004_s_ITM2C     | -0.01247  | 0.000312 | 0.005393 |
| 221006_s_SNX27     | 0.011794  | 6.14E-07 | 8.02E-05 |
| 221008_s_AGXT2L1   | 0.017996  | 0.000107 | 0.002495 |



|                    |          |          |          |
|--------------------|----------|----------|----------|
| 221041_s_SLC17A5   | 0.010699 | 2E-06    | 0.000164 |
| 221042_s_CLMN      | 0.004888 | 0.006535 | 0.047497 |
| 221058_s_CKLF      | -0.00977 | 9.16E-05 | 0.00223  |
| 221059_s_COTL1     | 0.010785 | 0.000123 | 0.002776 |
| 221069_s_TACO1     | 0.014123 | 0.000804 | 0.010785 |
| 221092_at_IKZF3    | -0.01131 | 0.000185 | 0.003698 |
| 221134_at_ANGPT4   | -0.00529 | 0.002231 | 0.022579 |
| 221139_s_CSAD      | -0.00539 | 0.007    | 0.049569 |
| 221142_s_PECR      | 0.007506 | 0.005598 | 0.042512 |
| 221144_at          | -0.00698 | 0.005038 | 0.03971  |
| 221163_s_MLXIPL    | 0.00559  | 0.002826 | 0.026803 |
| 221172_at_C7orf69  | -0.00486 | 0.005326 | 0.041179 |
| 221177_at_MIA2     | 0.01029  | 0.001209 | 0.014601 |
| 221188_s_CIDEB     | 0.010484 | 1.84E-06 | 0.000157 |
| 221189_s_TARS2     | 5.31E-03 | 0.002688 | 0.025886 |
| 221210_s_NPL       | 0.016496 | 4.22E-05 | 0.001267 |
| 221230_s_ARID4B    | -0.00739 | 9.72E-05 | 0.002325 |
| 221244_s_PDPK1     | 0.011019 | 4.25E-05 | 0.001276 |
| 221245_s_FZD5      | 0.013567 | 3.26E-06 | 0.000222 |
| 221246_x_TNS1      | 0.009373 | 6.4E-08  | 2.33E-05 |
| 221256_s_HDHD3     | 0.013295 | 4.6E-05  | 0.00136  |
| 221274_s_LMAN2L    | 0.008097 | 0.000182 | 0.003654 |
| 221286_s_MGC29506  | -0.00524 | 0.002901 | 0.027299 |
| 221293_s_DEF6      | -0.00565 | 0.003422 | 0.030484 |
| 221298_s_SLC22A8   | 0.029595 | 9.94E-08 | 2.73E-05 |
| 221305_s_UGT1A8    | 0.028551 | 2.66E-08 | 1.38E-05 |
| 221306_at_GPR27    | -0.00555 | 0.00038  | 0.006223 |
| 221311_x_LYRM2     | 0.005652 | 0.00409  | 0.034355 |
| 221315_s_FGF22     | -0.00496 | 0.002375 | 0.023627 |
| 221348_at_NPPC     | -0.00479 | 0.002877 | 0.02717  |
| 221369_at_MTNR1A   | 0.005791 | 0.006618 | 0.047944 |
| 221371_at_TNFSF18  | -0.00586 | 0.002095 | 0.021623 |
| 221379_at          | -0.00485 | 0.000892 | 0.011592 |
| 221411_at_HOXD12   | -0.00471 | 0.002829 | 0.026817 |
| 221474_at_MYL12B   | -0.00574 | 1.84E-05 | 0.000688 |
| 221498_at_SNX27    | 0.00599  | 0.001893 | 0.020175 |
| 221516_s_SMCR7L    | 0.008142 | 0.000539 | 0.008056 |
| 221524_s_RRAGD     | 0.005879 | 0.005189 | 0.040415 |
| 221542_s_ERLIN2    | 0.006595 | 0.001626 | 0.018151 |
| 221550_at_COX15    | 0.004924 | 0.004753 | 0.038128 |
| 221552_at_ABHD6    | 0.013925 | 3.31E-07 | 5.32E-05 |
| 221565_s_CALHM2    | -0.00767 | 1.22E-06 | 0.000121 |
| 221572_s_SLC26A6   | 0.011705 | 2.13E-06 | 0.000168 |
| 221575_at_SCLY     | 0.009645 | 4.37E-05 | 0.001305 |
| 221581_s_LAT2      | -0.00535 | 0.001012 | 0.012743 |
| 221582_at_HIST3H2A | -0.00641 | 0.000503 | 0.007653 |
| 221588_x_ALDH6A1   | 0.016616 | 1.68E-06 | 0.000149 |
| 221589_s_LOC10050  | 0.017557 | 6.07E-07 | 8E-05    |
| 221590_s_ALDH6A1   | 0.019479 | 3.27E-07 | 5.32E-05 |
| 221601_s_FAIM3     | -0.00968 | 0.00201  | 0.021111 |
| 221602_s_FAIM3     | -0.00972 | 8.3E-05  | 0.002073 |
| 221605_s_PIPOX     | 0.022337 | 5.55E-07 | 7.5E-05  |
| 221627_at_TRIM10   | 0.012822 | 7.65E-06 | 0.000393 |

|                    |          |          |          |
|--------------------|----------|----------|----------|
| 221628_s_GLYR1     | 0.00899  | 0.004028 | 0.034083 |
| 221636_s_MOSC2     | 1.54E-02 | 6.16E-09 | 6.19E-06 |
| 221648_s_LOC10050  | 0.014207 | 0.000247 | 0.004562 |
| 221651_x_IGK@      | -0.0194  | 0.006472 | 0.047238 |
| 221656_s_ARHGEF1   | 0.005498 | 0.001337 | 0.015753 |
| 221662_s_SLC22A7   | 0.007879 | 0.000144 | 0.003124 |
| 221664_s_F11R      | 0.007747 | 0.002082 | 0.021525 |
| 221666_s_PYCARD    | -0.01002 | 0.000409 | 0.006589 |
| 221668_s_DNAI2     | -0.00506 | 8.62E-05 | 0.002132 |
| 221669_s_ACAD8     | 0.010626 | 0.000214 | 0.00411  |
| 221675_s_CHPT1     | 0.007319 | 0.000871 | 0.011416 |
| 221679_s_ABHD6     | 0.022985 | 6.42E-09 | 6.19E-06 |
| 221698_s_CLEC7A    | -0.01338 | 7.47E-06 | 0.000388 |
| 221701_s_STRA6     | 0.006877 | 0.002015 | 0.021129 |
| 221724_s_CLEC4A    | -0.00544 | 0.001727 | 0.018923 |
| 221729_at COL5A2   | -0.00521 | 0.005878 | 0.04409  |
| 221731_x_VCAN      | -0.01815 | 0.000784 | 0.010637 |
| 221747_at TNS1     | 0.01144  | 0.000161 | 0.003361 |
| 221748_s_TNS1      | 0.01012  | 6.79E-07 | 8.54E-05 |
| 221773_at ELK3     | -0.01395 | 1.3E-05  | 0.000552 |
| 221791_s_CCDC72    | -0.00347 | 0.000792 | 0.01069  |
| 221817_at DOLPP1   | 0.005063 | 0.00613  | 0.045412 |
| 221840_at PTPRE    | -0.0094  | 0.000452 | 0.007106 |
| 221845_s_CLPB      | 0.007106 | 0.001865 | 0.019981 |
| 221848_at ZGPAT    | 1.12E-02 | 0.000648 | 0.009177 |
| 221868_at PAIP2B   | 0.00869  | 0.000226 | 0.004263 |
| 221872_at RARRES1  | -0.01012 | 0.005373 | 0.04145  |
| 221875_x_HLA-F     | -0.00784 | 0.002767 | 0.026462 |
| 221877_at IRGQ     | 0.006277 | 0.000274 | 0.004904 |
| 221879_at CALML4   | 0.010742 | 8.52E-05 | 0.002116 |
| 221881_s_CLIC4     | 0.009813 | 9.25E-06 | 0.00044  |
| 221891_x_HSPA8     | 0.003475 | 1.51E-05 | 0.000608 |
| 221910_at ETV1     | -0.00514 | 0.004036 | 0.0341   |
| 221925_s_CSPP1     | 0.007034 | 0.000581 | 0.008494 |
| 221928_at ACACB    | 0.00654  | 0.002219 | 0.022506 |
| 221935_s_C3orf64   | -0.00621 | 0.005599 | 0.042512 |
| 221943_x_RPL38     | -0.00405 | 0.000158 | 0.003303 |
| 221955_at          | 0.007067 | 0.001288 | 0.01529  |
| 221958_s_WLS       | 0.008791 | 1.78E-05 | 0.000673 |
| 221959_at FAM110B  | -0.00814 | 0.002815 | 0.026732 |
| 221977_at TBX2     | 0.007698 | 0.002794 | 0.026619 |
| 221978_at HLA-F    | -0.00873 | 0.000176 | 0.003571 |
| 221981_s_WDR59     | 0.011642 | 2.89E-06 | 0.000206 |
| 221998_s_VRK3      | 0.010607 | 0.000216 | 0.004125 |
| 222001_x_LOC72885  | -0.00739 | 1.48E-05 | 0.000603 |
| 222010_at TCP1     | 0.005787 | 0.004031 | 0.034094 |
| 222021_x_SDHAP1    | 0.004923 | 0.002138 | 0.021946 |
| 222033_s_FLT1      | 0.012672 | 1.1E-05  | 0.000496 |
| 222049_s_RBP4      | 0.02416  | 9.09E-06 | 0.000438 |
| 222052_at C19orf54 | 0.008472 | 2.98E-05 | 0.000975 |
| 222071_s_SLCO4C1   | 8.50E-03 | 0.004436 | 0.036291 |
| 222078_at PKLR     | 0.017838 | 7.02E-07 | 8.67E-05 |
| 222083_at GLYAT    | 0.017322 | 2.2E-05  | 0.000785 |

|           |          |          |          |          |          |
|-----------|----------|----------|----------|----------|----------|
| 222102_at | GSTA3    | 0.005635 | 0.002109 | 0.021732 |          |
| 222115_x  | GLYR1    | 0.006683 | 0.002686 | 0.025886 |          |
| 222134_at | DDO      | 0.008362 | 0.005503 | 0.042017 |          |
| 222138_s  | WDR13    | 0.006712 | 0.000334 | 0.005694 |          |
| 222140_s  | GPR89A   | 0.010628 | 2.89E-05 | 0.000957 |          |
| 222160_at | AKAP8L   | -0.00507 | 0.006888 | 0.049116 |          |
| 222190_s  | C16orf58 | 0.007451 | 0.000128 | 0.002845 |          |
| 222212_s  | LASS2    | 0.009536 | 2.57E-05 | 0.00088  |          |
| 222218_s  | PILRA    | -0.00591 | 0.003531 | 0.03114  |          |
| 222228_s  | ALKBH4   | 0.005211 | 0.00343  | 0.030542 |          |
| 222234_s  | DBNDD1   | -0.00435 | 0.006669 | 0.048085 |          |
| 222237_s  | ZFP112   | -0.00624 | 0.005367 | 0.04145  |          |
| 222249_at |          | -0.01245 | 0.001823 | 0.019675 |          |
| 222257_s  | ACE2     | 0.019379 | 6.97E-06 | 0.000369 |          |
| 222269_at | APOOL    | 8.65E-03 | 0.000127 | 0.002832 |          |
| 222278_at |          | -0.00537 | 0.000437 | 0.006925 |          |
| 222279_at | LOC28583 | -0.00565 | 0.007051 | 0.04982  |          |
| 222291_at | FAM149A  | 0.008016 | 0.001279 | 0.015238 |          |
| 222294_s  | RAB27A   | -0.01195 | 0.000348 | 0.005858 |          |
| 222297_x  | at       | -0.0052  | 0.000279 | 0.004968 |          |
| 266_s     | at       | CD24     | -0.01068 | 1.46E-06 | 0.000136 |
| 31835_at  | HRG      | 0.012977 | 9.17E-06 | 0.000438 |          |
| 32091_at  | SLC25A44 | 5.50E-03 | 0.001974 | 0.020836 |          |
| 32209_at  | FAM89B   | -0.00475 | 0.000982 | 0.012457 |          |
| 33197_at  | MYO7A    | 0.008016 | 1.11E-05 | 0.000499 |          |
| 33304_at  | ISG20    | -0.01135 | 0.000678 | 0.009496 |          |
| 33494_at  | ETFDH    | 0.011992 | 2.24E-07 | 4.09E-05 |          |
| 33767_at  | NEFH     | 0.011087 | 0.004931 | 0.03909  |          |
| 33814_at  | PAK4     | 0.004391 | 0.004482 | 0.036543 |          |
| 34210_at  | CD52     | -0.02477 | 2.91E-06 | 0.000207 |          |
| 34697_at  | LRP6     | 0.004548 | 0.001905 | 0.020284 |          |
| 34726_at  | CACNB3   | -0.00613 | 0.002356 | 0.023534 |          |
| 35147_at  | MCF2L    | 0.006288 | 0.001547 | 0.017479 |          |
| 36829_at  | PER1     | 0.004967 | 0.005056 | 0.039796 |          |
| 36994_at  | ATP6V0C  | 0.007122 | 1.4E-06  | 0.000132 |          |
| 37145_at  | GNLY     | -0.00791 | 0.000449 | 0.007067 |          |
| 37590_g   | at       | 0.015628 | 8.69E-07 | 9.75E-05 |          |
| 38149_at  | ARHGAP2  | -0.01201 | 0.000318 | 0.005468 |          |
| 38158_at  | ESPL1    | 0.008506 | 7.14E-05 | 0.001857 |          |
| 38447_at  | ADRBK1   | -0.00559 | 0.00504  | 0.03971  |          |
| 38487_at  | STAB1    | -0.00905 | 0.001228 | 0.014773 |          |
| 39248_at  | AQP3     | 0.006335 | 0.000882 | 0.011514 |          |
| 39891_at  | ZNF710   | -0.00428 | 0.001521 | 0.017364 |          |
| 40016_g   | ε        | MAST4    | 0.009747 | 2.17E-05 | 0.000778 |
| 40273_at  | SPHK2    | 0.011113 | 3.82E-05 | 0.001174 |          |
| 40489_at  | ATN1     | 0.005204 | 0.003035 | 0.028067 |          |
| 40562_at  | GNA11    | 0.008082 | 0.002635 | 0.025525 |          |
| 41047_at  | C9orf16  | -0.00673 | 0.001773 | 0.019341 |          |
| 41160_at  | MBD3     | 0.005531 | 0.001285 | 0.015276 |          |
| 41386_i   | at       | KDM6B    | 0.009755 | 0.000542 | 0.008091 |
| 41553_at  | OSGIN2   | 0.004772 | 0.000706 | 0.009797 |          |
| 41577_at  | PPP1R16E | 0.018972 | 4.67E-08 | 1.88E-05 |          |
| 41660_at  | CELSR1   | 0.011551 | 1.79E-07 | 3.59E-05 |          |

|           |          |          |          |          |
|-----------|----------|----------|----------|----------|
| 44654_at  | G6PC3    | 0.007662 | 0.000371 | 0.006104 |
| 44673_at  | SIGLEC1  | -0.00932 | 0.000152 | 0.003231 |
| 44696_at  | TBC1D13  | 0.01257  | 1.13E-06 | 0.000116 |
| 44790_s_a | C13orf18 | -0.01626 | 9.63E-06 | 0.000449 |
| 45288_at  | ABHD6    | 0.013251 | 8.11E-06 | 0.000404 |
| 45526_g_e | NAT15    | 0.006097 | 0.000892 | 0.011592 |
| 47069_at  | PRR5     | 0.01035  | 0.000673 | 0.00947  |
| 47550_at  | LZTS1    | -0.00859 | 0.000368 | 0.006074 |
| 47560_at  | LPHN1    | -0.00652 | 0.002893 | 0.027262 |
| 48808_at  | DHFR     | 0.007019 | 0.006349 | 0.046661 |
| 49306_at  | RASSF4   | 0.006451 | 0.003434 | 0.030562 |
| 52940_at  | LOC10029 | 0.011231 | 3.01E-05 | 0.000981 |
| 564_at    | GNA11    | 0.008095 | 0.005253 | 0.040823 |
| 56748_at  | TRIM10   | 0.00597  | 0.006104 | 0.04529  |
| 57539_at  | ZGPAT    | 0.01341  | 0.000292 | 0.005143 |
| 57540_at  | RBKS     | 0.006548 | 0.002082 | 0.021525 |
| 57715_at  | CALHM2   | -0.00521 | 0.000146 | 0.003136 |
| 59433_at  | LOC38990 | -0.00436 | 0.00587  | 0.044053 |
| 632_at    | GSK3A    | 0.005104 | 0.004234 | 0.035234 |
| 64064_at  | GIMAP5   | -0.00731 | 0.003873 | 0.033226 |
| 64371_at  | SUGP2    | 0.005612 | 0.005888 | 0.044132 |
| 64408_s_a | CALML4   | 0.011094 | 6.3E-05  | 0.001699 |
| 65585_at  | FAM86B1  | 0.007502 | 0.005074 | 0.039899 |
| 65718_at  | GPR124   | -0.004   | 0.001063 | 0.01324  |
| 89948_at  | PCIF1    | -0.00433 | 0.004776 | 0.038243 |
| 89977_at  | ACSM5    | 2.04E-02 | 1.06E-07 | 2.73E-05 |
| 90265_at  | ADAP1    | -0.00418 | 0.002719 | 0.02611  |
| 90610_at  | LRCH4    | -0.00694 | 0.000279 | 0.004969 |
| 91703_at  | EHBP1L1  | -0.00584 | 0.003367 | 0.030151 |
| AFFX-HUM  | STAT1    | -0.00607 | 0.00517  | 0.040319 |
| AFFX-HUM  | STAT1    | -0.00723 | 0.003416 | 0.03044  |
