# Supplementary material for: Human Kidney Tubule-Specific Gene Expression Based Dissection of Chronic Kidney Disease Traits
Source: PubMed Central journal article supplement — eBioMedicine. 2017 Sep 17;24:267–76. doi: 10.1016/j.ebiom.2017.09.014 (PMC5652292; doi:10.1016/j.ebiom.2017.09.014), 2017-09-17
Supplement: mmc2.pdf [file mmc2.pdf]

**Table S2**

| <b>probe</b> | <b>gene</b> | <b>effect</b> | <b>p.val</b> | <b>FDR</b> |
|--------------|-------------|---------------|--------------|------------|
| 1405_i_at    | CCL5        | -0.01873      | 3.02E-04     | 0.022821   |
| 200012_x_at  | RPL21       | -0.00419      | 0.000878     | 0.038577   |
| 200017_at    | RPS27A      | -0.00551      | 0.000325     | 0.023108   |
| 200018_at    | RPS13       | -0.00575      | 1.12E-04     | 0.015502   |
| 200032_s_at  | RPL9        | -0.00612      | 3.47E-05     | 0.008592   |
| 200059_s_at  | RHOA        | -0.00692      | 9.89E-05     | 0.014938   |
| 200062_s_at  | RPL30       | -0.00777      | 0.000245     | 0.021373   |
| 200080_s_at  | H3F3A       | -0.00436      | 1.20E-03     | 0.04576    |
| 200099_s_at  | RPS3A       | -0.0069       | 1.43E-06     | 0.003715   |
| 200644_at    | MARCKSL1    | -0.01237      | 1.28E-04     | 0.016535   |
| 200715_x_at  | RPL13A      | -0.00521      | 0.001047     | 0.041822   |
| 200741_s_at  | RPS27       | -0.00862      | 0.000285     | 0.022442   |
| 200768_s_at  | MAT2A       | 0.008566      | 1.31E-05     | 0.006249   |
| 200769_s_at  | MAT2A       | 0.009865      | 0.000253     | 0.021537   |
| 200781_s_at  | RPS15A      | -0.00696      | 0.001327     | 0.047503   |
| 200864_s_at  | RAB11A      | -0.01004      | 7.08E-04     | 0.034597   |
| 200896_x_at  | HDGF        | 0.003615      | 0.000921     | 0.039698   |
| 200908_s_at  | RPLP2       | -0.0058       | 0.000118     | 0.01593    |
| 200934_at    | DEK         | -0.00741      | 0.000159     | 0.017671   |
| 200954_at    | ATP6V0C     | 0.006023      | 1.60E-04     | 0.017702   |
| 200963_x_at  | RPL31       | -0.00422      | 0.000362     | 0.024083   |
| 200975_at    | PPT1        | -0.00676      | 2.95E-05     | 0.008212   |
| 201021_s_at  | DSTN        | -0.00527      | 0.001188     | 0.045419   |
| 201036_s_at  | HADH        | 0.012259      | 0.00042      | 0.025723   |
| 201049_s_at  | RPS18       | -0.00727      | 0.00046      | 0.026751   |
| 201061_s_at  | STOM        | 0.007061      | 0.000488     | 0.027736   |
| 201127_s_at  | ACLY        | 0.006891      | 0.000594     | 0.030676   |
| 201135_at    | ECHS1       | 0.010161      | 0.000625     | 0.031508   |
| 201136_at    | PLP2        | -0.01415      | 0.0006       | 0.030676   |
| 201163_s_at  | IGFBP7      | -0.00832      | 0.000125     | 0.016422   |
| 201257_x_at  | RPS3A       | -0.00585      | 3E-06        | 0.005634   |
| 201279_s_at  | DAB2        | 0.008876      | 0.000579     | 0.030359   |
| 201288_at    | ARHGDI B    | -0.01084      | 0.001192     | 0.045475   |
| 201290_at    | SEC11A      | -0.00286      | 0.001186     | 0.045419   |
| 201312_s_at  | SH3BGRL     | -0.00778      | 0.000593     | 0.030676   |
| 201319_at    | MYL12A      | -0.00457      | 0.000823     | 0.037241   |
| 201347_x_at  | GRHPR       | 0.011114      | 0.000541     | 0.029224   |
| 201349_at    | SLC9A3R1    | 0.009346      | 0.001326     | 0.047503   |
| 201415_at    | GSS         | 0.007768      | 0.000787     | 0.036534   |
| 201508_at    | IGFBP4      | 0.011149      | 0.001261     | 0.046831   |
| 201569_s_at  | SAMM50      | 0.008527      | 0.000917     | 0.039698   |
| 201649_at    | UBE2L6      | -0.00779      | 0.000408     | 0.025723   |
| 201668_x_at  | MARCKS      | -0.00869      | 0.000894     | 0.03903    |
| 201670_s_at  | MARCKS      | -0.01034      | 0.001049     | 0.041822   |
| 201739_at    | SGK1        | 0.007652      | 0.000626     | 0.031508   |
| 201772_at    | AZIN1       | -0.00687      | 0.001334     | 0.047504   |
| 201796_s_at  | VAR S       | 0.007937      | 0.000932     | 0.03994    |

|             |          |          |          |          |
|-------------|----------|----------|----------|----------|
| 201848_s_at | BNIP3    | 0.008217 | 0.001047 | 0.041822 |
| 201889_at   | FAM3C    | -0.00891 | 7.91E-04 | 0.036555 |
| 201891_s_at | B2M      | -0.00593 | 0.000219 | 0.020779 |
| 201925_s_at | CD55     | -0.00917 | 0.001245 | 0.046551 |
| 201984_s_at | EGFR     | 0.007629 | 0.001174 | 0.045307 |
| 202003_s_at | ACAA2    | 0.008443 | 0.000617 | 0.031317 |
| 202017_at   | EPHX1    | 0.01325  | 2.18E-05 | 0.007474 |
| 202025_x_at | ACAA1    | 0.012458 | 0.000106 | 0.01523  |
| 202108_at   | PEPD     | 0.017411 | 4.36E-05 | 0.009271 |
| 202178_at   | PRKCZ    | 0.008533 | 0.001381 | 0.048347 |
| 202210_x_at | GSK3A    | 0.006314 | 0.001269 | 0.046999 |
| 202295_s_at | CTSH     | 0.00867  | 0.000781 | 0.036422 |
| 202340_x_at | NR4A1    | 0.010209 | 0.000611 | 0.031082 |
| 202422_s_at | ACSL4    | -0.01435 | 2.9E-05  | 0.008212 |
| 202430_s_at | PLSCR1   | -0.01238 | 0.000258 | 0.021895 |
| 202437_s_at | CYP1B1   | -0.01608 | 3.52E-05 | 0.008628 |
| 202446_s_at | PLSCR1   | -0.00925 | 0.000952 | 0.04024  |
| 202454_s_at | ERBB3    | 0.009417 | 0.000185 | 0.018963 |
| 202503_s_at | KIAA0101 | -0.0129  | 1.65E-05 | 0.006378 |
| 202590_s_at | PDK2     | 0.012486 | 0.000603 | 0.03073  |
| 202598_at   | S100A13  | -0.01373 | 2.7E-05  | 0.008155 |
| 202622_s_at | ATXN2    | 0.006126 | 0.000101 | 0.014938 |
| 202733_at   | P4HA2    | 0.013834 | 2.39E-05 | 0.00773  |
| 202740_at   | ABHD14A  | 0.018181 | 0.000142 | 0.017117 |
| 202746_at   | ITM2A    | -0.01212 | 0.00041  | 0.025723 |
| 202752_x_at | SLC7A8   | 0.017822 | 1.11E-03 | 0.043657 |
| 202763_at   | CASP3    | -0.0078  | 0.000386 | 0.025079 |
| 202830_s_at | SLC37A4  | 0.012213 | 0.000219 | 0.020779 |
| 202833_s_at | SERPINA1 | 0.012506 | 0.000315 | 0.022884 |
| 202834_at   | AGT      | 0.017067 | 3.18E-05 | 0.008212 |
| 202847_at   | PCK2     | 0.016234 | 7.82E-05 | 0.013269 |
| 202888_s_at | ANPEP    | 0.01608  | 0.000288 | 0.022442 |
| 202889_x_at | MAP7     | 0.01035  | 0.000692 | 0.033948 |
| 202898_at   | SDC3     | -0.00893 | 0.001028 | 0.041793 |
| 202901_x_at | CTSS     | -0.01246 | 0.000265 | 0.022122 |
| 202931_x_at | BIN1     | 0.009372 | 0.000731 | 0.035259 |
| 203132_at   | RB1      | -0.01262 | 0.000316 | 0.022884 |
| 203145_at   | SPAG5    | 0.018395 | 7.92E-05 | 0.013269 |
| 203158_s_at | GLS      | 0.011511 | 3.2E-05  | 0.008212 |
| 203159_at   | GLS      | 0.008525 | 0.000342 | 0.023726 |
| 203207_s_at | MTFR1    | 0.009629 | 0.001293 | 0.047094 |
| 203213_at   | CDK1     | -0.00831 | 0.000587 | 0.030616 |
| 203217_s_at | ST3GAL5  | -0.01374 | 0.000335 | 0.023592 |
| 203256_at   | CDH3     | -0.01202 | 0.000663 | 0.032869 |
| 203316_s_at | SNRPE    | -0.00503 | 0.000219 | 0.020779 |
| 203381_s_at | APOE     | 0.018606 | 0.000227 | 0.020863 |
| 203382_s_at | APOE     | 0.012178 | 0.000268 | 0.022122 |
| 203402_at   | KCNAB2   | 0.012523 | 1.21E-05 | 0.006249 |
| 203416_at   | CD53     | -0.01908 | 0.000788 | 0.036534 |

|             |              |          |          |          |
|-------------|--------------|----------|----------|----------|
| 203423_at   | RBP1         | -0.01184 | 0.000231 | 0.021    |
| 203434_s_at | MME          | 0.017203 | 0.000152 | 0.017365 |
| 203435_s_at | MME          | 0.017995 | 7.12E-05 | 0.012597 |
| 203441_s_at | CDH2         | 0.010165 | 0.000186 | 0.018963 |
| 203455_s_at | SAT1         | -0.0056  | 0.000949 | 0.04024  |
| 203484_at   | SEC61G       | -0.0069  | 0.001132 | 0.044176 |
| 203559_s_at | ABP1         | 0.022491 | 0.000112 | 0.015502 |
| 203560_at   | GGH          | 1.42E-02 | 0.001001 | 0.041139 |
| 203603_s_at | ZEB2         | -0.01418 | 0.000814 | 0.037234 |
| 203628_at   | IGF1R        | 0.010743 | 3.12E-05 | 0.008212 |
| 203671_at   | TPMT         | 0.009015 | 0.000813 | 0.037234 |
| 203675_at   | NUCB2        | -0.00914 | 0.001035 | 0.041806 |
| 203718_at   | PNPLA6       | 0.005889 | 0.001075 | 0.042535 |
| 203722_at   | ALDH4A1      | 0.012769 | 0.001251 | 0.046616 |
| 203725_at   | GADD45A      | 0.00813  | 0.001231 | 0.046175 |
| 203727_at   | SKIV2L       | 0.005788 | 0.000736 | 0.035259 |
| 203765_at   | GCA          | -0.00745 | 0.000369 | 0.024449 |
| 203790_s_at | HRSP12       | 0.01423  | 0.001327 | 0.047503 |
| 203799_at   | CD302        | -0.01111 | 0.001358 | 0.047941 |
| 203814_s_at | NQO2         | 0.015558 | 0.000347 | 0.023726 |
| 203832_at   | SNRPF        | -0.00551 | 0.001354 | 0.047875 |
| 203892_at   | WFDC2        | -0.01804 | 7.62E-05 | 0.013262 |
| 203900_at   | KIAA0467     | 0.006014 | 0.000897 | 0.039102 |
| 203908_at   | SLC4A4       | 0.01697  | 0.000251 | 0.021434 |
| 203929_s_at | MAPT         | 0.013159 | 0.00102  | 0.041532 |
| 203964_at   | NMI          | -0.00797 | 0.001308 | 0.047461 |
| 203986_at   | FAM47E       | 0.009323 | 0.000407 | 0.025723 |
| 204044_at   | QPRT         | 0.014643 | 0.000175 | 0.018641 |
| 204057_at   | IRF8         | -0.0101  | 0.001375 | 0.048224 |
| 204066_s_at | AGAP1        | 0.013024 | 0.000104 | 0.015188 |
| 204115_at   | GNG11        | -0.00882 | 0.000453 | 0.026587 |
| 204118_at   | CD48         | -0.02196 | 0.000505 | 0.028206 |
| 204205_at   | APOBEC3G     | -0.01519 | 0.000262 | 0.022104 |
| 204221_x_at | GLIPR1       | -0.00618 | 0.001306 | 0.047461 |
| 204224_s_at | GCH1         | 0.01272  | 0.000516 | 0.028468 |
| 204231_s_at | FAAH         | 0.012406 | 1.55E-05 | 0.006378 |
| 204232_at   | FCER1G       | -0.01759 | 0.00036  | 0.023981 |
| 204289_at   | LOC100506517 | 0.013961 | 0.000287 | 0.022442 |
| 204290_s_at | ALDH6A1      | 0.01554  | 4.7E-05  | 0.009881 |
| 204294_at   | AMT          | 0.009731 | 0.000287 | 0.022442 |
| 204301_at   | KBTBD11      | 0.010021 | 0.000539 | 0.029224 |
| 204319_s_at | RGS10        | -0.0116  | 0.000314 | 0.022884 |
| 204323_x_at | NF1          | 0.008999 | 0.000885 | 0.038796 |
| 204347_at   | AK4          | 0.015645 | 0.000146 | 0.017265 |
| 204379_s_at | FGFR3        | 0.01435  | 3.68E-05 | 0.008648 |
| 204388_s_at | MAOA         | 0.015371 | 0.000596 | 0.030676 |
| 204415_at   | IFI6         | -0.01164 | 1.85E-05 | 0.006982 |
| 204430_s_at | SLC2A5       | 0.015803 | 0.000337 | 0.023689 |
| 204436_at   | PLEKHO2      | -0.00885 | 0.000248 | 0.021391 |

|             |          |          |          |          |
|-------------|----------|----------|----------|----------|
| 204517_at   | PPIC     | -0.00708 | 0.00071  | 0.034626 |
| 204584_at   | L1CAM    | -0.00934 | 0.001033 | 0.041806 |
| 204588_s_at | SLC7A7   | 0.020899 | 1.34E-05 | 0.006249 |
| 204606_at   | CCL21    | -0.01727 | 0.000571 | 0.030159 |
| 204638_at   | ACP5     | 0.012631 | 0.000663 | 0.032869 |
| 204655_at   | CCL5     | -0.01289 | 0.001179 | 0.045356 |
| 204694_at   | AFP      | 0.005111 | 0.001291 | 0.047094 |
| 204704_s_at | ALDOB    | 0.021707 | 0.000774 | 0.036312 |
| 204705_x_at | ALDOB    | 0.020875 | 0.000141 | 0.017117 |
| 204774_at   | EVI2A    | -0.01804 | 0.000399 | 0.025587 |
| 204812_at   | ZW10     | 0.009281 | 0.000733 | 0.035259 |
| 204923_at   | SASH3    | -0.01385 | 0.000567 | 0.030043 |
| 204959_at   | MNDA     | -0.01605 | 0.000664 | 0.032869 |
| 204970_s_at | MAFG     | 0.007117 | 0.000182 | 0.018894 |
| 204972_at   | OAS2     | -0.01245 | 6.7E-06  | 0.006249 |
| 204973_at   | GJB1     | 0.011068 | 0.000773 | 0.036312 |
| 205012_s_at | HAGH     | 0.010831 | 0.000524 | 0.028731 |
| 205044_at   | GABRP    | -0.01136 | 0.000483 | 0.027645 |
| 205074_at   | SLC22A5  | 0.01286  | 0.000106 | 0.01523  |
| 205075_at   | SERPINF2 | 0.011837 | 3.03E-05 | 0.008212 |
| 205081_at   | CRIP1    | -0.01555 | 0.000396 | 0.025512 |
| 205201_at   | GLI3     | 0.008457 | 0.000203 | 0.019908 |
| 205208_at   | ALDH1L1  | 0.013496 | 0.000465 | 0.026894 |
| 205216_s_at | APOH     | 0.022864 | 5.56E-05 | 0.011063 |
| 205243_at   | SLC13A3  | 0.026576 | 3.61E-05 | 0.008648 |
| 205244_s_at | SLC13A3  | 0.026637 | 1.05E-05 | 0.006249 |
| 205306_x_at | KMO      | 0.017412 | 0.001228 | 0.046175 |
| 205307_s_at | KMO      | 0.019475 | 0.000283 | 0.022442 |
| 205311_at   | DDC      | 0.021239 | 0.000198 | 0.019665 |
| 205315_s_at | SNTB2    | 0.009065 | 0.000688 | 0.03385  |
| 205364_at   | ACOX2    | 0.017685 | 0.000497 | 0.027839 |
| 205380_at   | PDZK1    | 0.009255 | 0.000822 | 0.037241 |
| 205464_at   | SCNN1B   | 0.007237 | 0.001292 | 0.047094 |
| 205489_at   | CRYM     | 0.011503 | 0.000103 | 0.015162 |
| 205502_at   | CYP17A1  | 0.016842 | 0.00033  | 0.023315 |
| 205592_at   | SLC4A1   | 0.022253 | 7.95E-07 | 0.003261 |
| 205624_at   | CPA3     | -0.02418 | 3.23E-05 | 0.008212 |
| 205653_at   | CTSG     | -0.02031 | 9.51E-07 | 0.003261 |
| 205675_at   | MTTP     | 0.01927  | 0.0009   | 0.039169 |
| 205712_at   | PTPRD    | 0.01407  | 4.1E-05  | 0.009128 |
| 205730_s_at | ABLIM3   | 0.014329 | 0.000352 | 0.023817 |
| 205750_at   | BPHL     | 0.011935 | 0.000406 | 0.025723 |
| 205757_at   | ENTPD5   | 0.017052 | 6.67E-06 | 0.006249 |
| 205768_s_at | SLC27A2  | 0.014786 | 0.0006   | 0.030676 |
| 205769_at   | SLC27A2  | 0.014367 | 0.001008 | 0.04127  |
| 205796_at   | TCP11L1  | 0.011146 | 0.000962 | 0.040294 |
| 205826_at   | MYOM2    | 0.011091 | 0.001275 | 0.047094 |
| 205859_at   | LY86     | -0.01038 | 0.00062  | 0.031367 |
| 205860_x_at | FOLH1    | 0.020218 | 0.000316 | 0.022884 |

|             |           |          |          |          |
|-------------|-----------|----------|----------|----------|
| 205892_s_at | FABP1     | 0.027405 | 0.00014  | 0.017117 |
| 205896_at   | SLC22A4   | 0.015672 | 2.95E-05 | 0.008212 |
| 205898_at   | CX3CR1    | -0.01122 | 0.000171 | 0.018509 |
| 205939_at   | CYP3A7    | 0.015359 | 0.001224 | 0.046175 |
| 205983_at   | DPEP1     | 0.015801 | 0.000225 | 0.020845 |
| 206024_at   | HPD       | 0.027719 | 0.000174 | 0.018641 |
| 206030_at   | ASPA      | 0.016134 | 6.94E-05 | 0.012597 |
| 206058_at   | SLC6A12   | 0.012995 | 0.000474 | 0.02727  |
| 206119_at   | BHMT      | 0.017284 | 0.000348 | 0.023726 |
| 206155_at   | ABCC2     | 0.019639 | 7.62E-05 | 0.013262 |
| 206217_at   | EDA       | 0.007423 | 0.000231 | 0.021    |
| 206239_s_at | SPINK1    | 0.022801 | 0.000144 | 0.017125 |
| 206242_at   | TM4SF5    | 0.009614 | 0.000138 | 0.017117 |
| 206249_at   | MAP3K13   | 0.010327 | 0.000224 | 0.020845 |
| 206254_at   | EGF       | 0.020958 | 0.000536 | 0.029224 |
| 206259_at   | PROC      | 0.014063 | 0.000302 | 0.022821 |
| 206325_at   | SERPINA6  | 0.019073 | 0.000182 | 0.018894 |
| 206332_s_at | IFI16     | -0.01239 | 0.000999 | 0.041136 |
| 206363_at   | MAF       | 0.013914 | 0.000356 | 0.023915 |
| 206396_at   | SLC1A1    | 0.011076 | 0.001216 | 0.046161 |
| 206401_s_at | MAPT      | 1.27E-02 | 0.001364 | 0.048016 |
| 206457_s_at | DIO1      | 0.02117  | 0.000509 | 0.028347 |
| 206469_x_at | AKR7A3    | 0.015929 | 0.000406 | 0.025723 |
| 206483_at   | LRRC6     | 0.006893 | 0.000266 | 0.022122 |
| 206484_s_at | XPNPEP2   | 0.029477 | 3.04E-06 | 0.005634 |
| 206492_at   | FHIT      | 0.012152 | 8.12E-05 | 0.013406 |
| 206500_s_at | C14orf106 | -0.01083 | 0.001406 | 0.04895  |
| 206514_s_at | CYP4F2    | 0.020693 | 0.00019  | 0.019206 |
| 206522_at   | MGAM      | 0.017492 | 0.000234 | 0.021072 |
| 206527_at   | ABAT      | 0.01769  | 0.000134 | 0.016854 |
| 206541_at   | KLKB1     | 0.010282 | 1.32E-05 | 0.006249 |
| 206542_s_at | SMARCA2   | -0.00651 | 1.97E-05 | 0.007077 |
| 206545_at   | CD28      | -0.00933 | 0.00112  | 0.043933 |
| 206584_at   | LY96      | -0.01621 | 0.001111 | 0.043657 |
| 206610_s_at | F11       | 0.01294  | 0.000306 | 0.022868 |
| 206629_at   | ADAMTSL2  | 0.006125 | 0.000553 | 0.029617 |
| 206695_x_at | ZNF43     | -0.00655 | 0.001013 | 0.041334 |
| 206716_at   | UMOD      | 0.026963 | 0.000268 | 0.022122 |
| 206726_at   | HPGDS     | -0.01751 | 2.71E-05 | 0.008155 |
| 206730_at   | GRIA3     | 0.011148 | 0.000955 | 0.040281 |
| 206748_s_at | SPAG9     | 0.00878  | 0.000989 | 0.041019 |
| 206754_s_at | CYP2B6    | 0.019027 | 0.00041  | 0.025723 |
| 206775_at   | CUBN      | 0.022844 | 0.000144 | 0.017125 |
| 206809_s_at | HNRNPA3   | -0.00424 | 0.000241 | 0.021339 |
| 206840_at   | AFM       | 0.023753 | 0.000154 | 0.017401 |
| 206846_s_at | HDAC6     | 0.012663 | 0.000263 | 0.022122 |
| 206878_at   | DAO       | 0.023692 | 3.24E-05 | 0.008212 |
| 206955_at   | AQP7      | 0.013798 | 0.000749 | 0.035626 |
| 206964_at   | NAT8B     | 0.014876 | 0.000518 | 0.028468 |

|             |          |          |          |          |
|-------------|----------|----------|----------|----------|
| 206978_at   | CCR2     | -0.0116  | 0.001288 | 0.047094 |
| 207044_at   | THRB     | 0.007664 | 0.00082  | 0.037241 |
| 207049_at   | SCN8A    | 0.011983 | 4.14E-05 | 0.009128 |
| 207050_at   | CACNA2D1 | 0.00736  | 0.000463 | 0.026883 |
| 207076_s_at | ASS1     | 0.017944 | 1.66E-05 | 0.006378 |
| 207105_s_at | PIK3R2   | 0.006559 | 0.000657 | 0.032865 |
| 207184_at   | SLC6A13  | 0.010833 | 0.000863 | 0.038159 |
| 207211_at   | USP2     | 0.015527 | 0.001331 | 0.047503 |
| 207212_at   | SLC9A3   | 0.008765 | 0.000824 | 0.037241 |
| 207213_s_at | USP2     | 0.022142 | 0.000434 | 0.026069 |
| 207243_s_at | CALM2    | -0.00429 | 4.25E-05 | 0.009271 |
| 207275_s_at | ACSL1    | 0.012969 | 0.000348 | 0.023726 |
| 207277_at   | CD209    | -0.01521 | 0.000132 | 0.016759 |
| 207320_x_at | STAU1    | 0.006638 | 0.001123 | 0.043972 |
| 207339_s_at | LTB      | -0.01095 | 0.000661 | 0.032869 |
| 207378_at   | TREH     | 0.009078 | 0.000446 | 0.026494 |
| 207387_s_at | GK       | 0.013392 | 0.000215 | 0.020755 |
| 207407_x_at | CYP4A11  | 0.017402 | 0.000219 | 0.020779 |
| 207444_at   | SLC22A13 | 0.015454 | 2.35E-05 | 0.007691 |
| 207497_s_at | MS4A2    | -0.00995 | 0.001074 | 0.042535 |
| 207544_s_at | ADH6     | 0.015774 | 0.001151 | 0.044641 |
| 207560_at   | SLC28A1  | 0.012801 | 0.000105 | 0.01523  |
| 207567_at   | SLC13A2  | 0.013434 | 0.000319 | 0.022914 |
| 207655_s_at | BLNK     | -0.01046 | 0.000236 | 0.021113 |
| 207858_s_at | PKLR     | 0.022878 | 4.11E-05 | 0.009128 |
| 207871_s_at | ST7      | 0.007165 | 0.001286 | 0.047094 |
| 207998_s_at | CACNA1D  | 0.009355 | 0.0001   | 0.014938 |
| 208006_at   | FOXI1    | 0.009846 | 0.0003   | 0.022805 |
| 208012_x_at | SP110    | -0.00852 | 0.001259 | 0.046821 |
| 208018_s_at | HCK      | -0.00704 | 0.000555 | 0.029664 |
| 208032_s_at | GRIA3    | 0.009724 | 0.000278 | 0.022442 |
| 208091_s_at | VOPP1    | -0.00909 | 0.001285 | 0.047094 |
| 208146_s_at | CPVL     | -0.01278 | 0.00073  | 0.035259 |
| 208177_at   | SLC34A1  | 0.028076 | 6.57E-06 | 0.006249 |
| 208252_s_at | CHST3    | 0.006874 | 0.000597 | 0.030676 |
| 208296_x_at | TNFAIP8  | -0.01082 | 0.000375 | 0.024754 |
| 208318_s_at | XYLB     | 0.017022 | 0.000515 | 0.028468 |
| 208354_s_at | SLC12A3  | 0.018853 | 0.00085  | 0.037856 |
| 208369_s_at | GCDH     | 0.011954 | 0.000703 | 0.034421 |
| 208429_x_at | HNF4A    | 0.016236 | 0.000417 | 0.025723 |
| 208456_s_at | RRAS2    | 0.007724 | 0.000491 | 0.027817 |
| 208596_s_at | UGT1A1   | 0.01392  | 0.000383 | 0.024941 |
| 208651_x_at | CD24     | -0.00737 | 0.000439 | 0.026228 |
| 208655_at   | CCNI     | -0.00348 | 0.000541 | 0.029224 |
| 208678_at   | ATP6V1E1 | 0.004953 | 0.001362 | 0.048005 |
| 208707_at   | EIF5     | 0.009813 | 0.000202 | 0.019871 |
| 208754_s_at | NAP1L1   | -0.00903 | 0.000685 | 0.033739 |
| 208770_s_at | EIF4EBP2 | 0.005613 | 0.000282 | 0.022442 |
| 208808_s_at | HMGB2    | -0.00991 | 6.94E-05 | 0.012597 |

|             |           |          |          |          |
|-------------|-----------|----------|----------|----------|
| 208830_s_at | SUPT6H    | 0.008484 | 0.000315 | 0.022884 |
| 208850_s_at | THY1      | 0.016988 | 0.000248 | 0.021391 |
| 208851_s_at | THY1      | 0.017187 | 0.000176 | 0.018641 |
| 208885_at   | LCP1      | -0.01567 | 0.000183 | 0.018894 |
| 208997_s_at | UCP2      | -0.0148  | 0.001186 | 0.045419 |
| 209112_at   | CDKN1B    | -0.00921 | 0.000267 | 0.022122 |
| 209120_at   | NR2F2     | -0.00808 | 6.13E-06 | 0.006249 |
| 209122_at   | PLIN2     | 0.014288 | 0.000299 | 0.022805 |
| 209123_at   | QDPR      | 0.014489 | 0.000434 | 0.026069 |
| 209173_at   | AGR2      | -0.02402 | 0.00011  | 0.015445 |
| 209214_s_at | EWSR1     | -0.00587 | 0.000388 | 0.025097 |
| 209222_s_at | OSBPL2    | 0.005777 | 0.000442 | 0.026308 |
| 209234_at   | KIF1B     | 0.007126 | 0.001069 | 0.042465 |
| 209340_at   | UAP1      | 0.009289 | 0.00095  | 0.04024  |
| 209368_at   | EPHX2     | 0.014145 | 0.000315 | 0.022884 |
| 209371_s_at | SH3BP2    | 0.014988 | 0.000145 | 0.01718  |
| 209374_s_at | IGHM      | -0.02283 | 5.12E-05 | 0.010372 |
| 209409_at   | GRB10     | 0.010214 | 0.000389 | 0.025097 |
| 209410_s_at | GRB10     | 0.012493 | 1.3E-05  | 0.006249 |
| 209459_s_at | ABAT      | 0.015971 | 0.001129 | 0.044128 |
| 209460_at   | ABAT      | 0.018572 | 4.88E-05 | 0.010064 |
| 209468_at   | LRP5      | 0.009515 | 0.000419 | 0.025723 |
| 209514_s_at | RAB27A    | -0.01198 | 0.001294 | 0.047094 |
| 209600_s_at | ACOX1     | 0.011373 | 4.36E-05 | 0.009271 |
| 209605_at   | TST       | 0.010332 | 0.000426 | 0.025814 |
| 209612_s_at | ADH1B     | -0.01664 | 0.000964 | 0.040294 |
| 209686_at   | S100B     | -0.01246 | 6.12E-06 | 0.006249 |
| 209696_at   | FBP1      | 0.017983 | 5.7E-05  | 0.011244 |
| 209762_x_at | SP110     | -0.01108 | 0.000411 | 0.025723 |
| 209771_x_at | CD24      | -0.00773 | 0.000417 | 0.025723 |
| 209786_at   | HMGNA4    | -0.00743 | 0.001426 | 0.049344 |
| 209795_at   | CD69      | -0.01712 | 0.000579 | 0.030359 |
| 209806_at   | HIST1H2BK | -0.01195 | 0.000938 | 0.039986 |
| 209897_s_at | SLIT2     | 0.012047 | 2.59E-05 | 0.008017 |
| 209970_x_at | CASP1     | -0.01284 | 0.000766 | 0.036138 |
| 209977_at   | PLG       | 0.032541 | 5.43E-06 | 0.006249 |
| 209978_s_at | LPA       | 0.035357 | 6.02E-06 | 0.006249 |
| 210012_s_at | EWSR1     | 0.009421 | 0.000141 | 0.017117 |
| 210021_s_at | CCNO      | -0.00803 | 0.000244 | 0.021373 |
| 210031_at   | CD247     | -0.00947 | 0.000135 | 0.01691  |
| 210072_at   | CCL19     | -0.02009 | 0.00032  | 0.02293  |
| 210074_at   | CTSL2     | 0.015461 | 0.000382 | 0.024941 |
| 210119_at   | KCNJ15    | 0.009656 | 7.89E-05 | 0.013269 |
| 210201_x_at | BIN1      | 0.010031 | 0.001151 | 0.044641 |
| 210337_s_at | ACLY      | 0.007695 | 0.000493 | 0.027839 |
| 210343_s_at | SLC22A6   | 0.020454 | 0.000119 | 0.015965 |
| 210371_s_at | RBBP4     | -0.00656 | 7.06E-05 | 0.012597 |
| 210399_x_at | FUT6      | 0.010122 | 0.00015  | 0.017365 |
| 210426_x_at | RORA      | 9.74E-03 | 4.83E-05 | 0.010064 |

|             |           |           |          |          |
|-------------|-----------|-----------|----------|----------|
| 210451_at   | PKLR      | 0.016012  | 0.000998 | 0.041136 |
| 210452_x_at | CYP4F2    | 0.019447  | 9.87E-05 | 0.014938 |
| 210476_s_at | PRLR      | 0.013757  | 0.000843 | 0.037825 |
| 210513_s_at | VEGFA     | 0.011343  | 0.000936 | 0.039986 |
| 210629_x_at | LST1      | -0.01255  | 0.000154 | 0.017401 |
| 210648_x_at | SNX3      | -0.00475  | 0.000296 | 0.022721 |
| 210654_at   | TNFRSF10D | 0.006288  | 0.000844 | 0.037825 |
| 210663_s_at | KYNU      | 0.013005  | 0.000379 | 0.024843 |
| 210738_s_at | SLC4A4    | 0.016794  | 0.00104  | 0.041806 |
| 210739_x_at | SLC4A4    | 0.0155    | 0.000155 | 0.017402 |
| 210786_s_at | FLI1      | -0.00901  | 0.001342 | 0.047677 |
| 210839_s_at | ENPP2     | 0.011175  | 0.000307 | 0.022868 |
| 210840_s_at | IQGAP1    | -0.00765  | 0.000962 | 0.040294 |
| 210852_s_at | AASS      | 0.008514  | 0.000128 | 0.016535 |
| 210871_x_at | SSX2IP    | 0.010432  | 0.000282 | 0.022442 |
| 210915_x_at | TRBC1     | -0.02079  | 0.000271 | 0.022256 |
| 210944_s_at | CAPN3     | 0.01623   | 0.000459 | 0.026751 |
| 210951_x_at | RAB27A    | -0.01377  | 0.000453 | 0.026587 |
| 210982_s_at | HLA-DRA   | -0.01337  | 0.000467 | 0.026937 |
| 210999_s_at | GRB10     | 0.008898  | 0.000151 | 0.017365 |
| 211028_s_at | KHK       | 0.022114  | 7.3E-06  | 0.006249 |
| 211034_s_at | C12orf51  | 0.006323  | 0.000597 | 0.030676 |
| 211138_s_at | KMO       | 0.017556  | 0.000497 | 0.027839 |
| 211231_x_at | CYP4A11   | 0.023614  | 2.33E-05 | 0.007691 |
| 211270_x_at | PTBP1     | 0.004275  | 0.00034  | 0.023726 |
| 211298_s_at | ALB       | 0.034533  | 1.18E-05 | 0.006249 |
| 211303_x_at | FOLH1B    | 0.018428  | 0.000488 | 0.027736 |
| 211360_s_at | ITPR2     | 0.008092  | 0.001419 | 0.049174 |
| 211366_x_at | CASP1     | -0.01201  | 0.000165 | 0.018103 |
| 211368_s_at | CASP1     | -0.01565  | 0.000222 | 0.020805 |
| 211429_s_at | SERPINA1  | 0.011527  | 0.000346 | 0.023726 |
| 211456_x_at | MT1P2     | 0.012798  | 0.00092  | 0.039698 |
| 211465_x_at | FUT6      | 0.013547  | 3.07E-05 | 0.008212 |
| 211494_s_at | SLC4A4    | 0.012868  | 0.00024  | 0.021297 |
| 211529_x_at | HLA-G     | -0.009    | 0.000992 | 0.041066 |
| 211542_x_at | RPS10     | -0.00828  | 0.000142 | 0.017117 |
| 211552_s_at | ALDH4A1   | 0.014159  | 0.000344 | 0.023726 |
| 211569_s_at | HADH      | 0.013071  | 0.000862 | 0.038159 |
| 211581_x_at | LST1      | -1.32E-02 | 0.000279 | 0.022442 |
| 211582_x_at | LST1      | -0.01348  | 0.000575 | 0.030275 |
| 211597_s_at | HOPX      | -0.01812  | 0.0006   | 0.030676 |
| 211682_x_at | UGT2B28   | 0.009653  | 0.001005 | 0.04122  |
| 211704_s_at | SPIN2A    | -0.00693  | 0.000125 | 0.016422 |
| 211712_s_at | ANXA9     | 0.010972  | 3.77E-05 | 0.008648 |
| 211776_s_at | EPB41L3   | 0.009831  | 0.00127  | 0.046999 |
| 211795_s_at | FYB       | -0.01393  | 0.000132 | 0.016759 |
| 211796_s_at | TRBC1     | -0.02535  | 0.000891 | 0.039003 |
| 211806_s_at | KCNJ15    | 0.01153   | 0.001382 | 0.048347 |
| 211883_x_at | CEACAM1   | 0.009476  | 0.000497 | 0.027839 |



|             |          |           |          |          |
|-------------|----------|-----------|----------|----------|
| 211890_x_at | CAPN3    | 0.018546  | 0.000149 | 0.017365 |
| 211950_at   | UBR4     | 0.007654  | 0.000235 | 0.021072 |
| 211962_s_at | ZFP36L1  | -0.00665  | 1.56E-05 | 0.006378 |
| 211967_at   | TMEM123  | -0.01213  | 2.47E-05 | 0.007876 |
| 211991_s_at | HLA-DPA1 | -0.01603  | 0.001111 | 0.043657 |
| 212000_at   | SUGP2    | 0.006832  | 0.001311 | 0.047499 |
| 212001_at   | SUGP2    | 0.005898  | 0.000627 | 0.031508 |
| 212051_at   | WIPF2    | 0.007842  | 0.000729 | 0.035259 |
| 212231_at   | FBXO21   | 7.98E-03  | 0.001152 | 0.044641 |
| 212352_s_at | TMED10   | -0.00652  | 0.000179 | 0.018894 |
| 212359_s_at | KIAA0913 | 0.006477  | 0.001042 | 0.041822 |
| 212369_at   | ZNF384   | 0.006164  | 0.001039 | 0.041806 |
| 212391_x_at | RPS3A    | -0.0062   | 1.47E-05 | 0.006378 |
| 212432_at   | GRPEL1   | 0.008612  | 0.000201 | 0.019871 |
| 212445_s_at | NEDD4L   | 0.007528  | 0.001335 | 0.047504 |
| 212448_at   | NEDD4L   | 0.009078  | 0.000929 | 0.03994  |
| 212456_at   | KIAA0664 | 0.007482  | 7.01E-05 | 0.012597 |
| 212470_at   | SPAG9    | 0.008049  | 0.000244 | 0.021373 |
| 212519_at   | UBE2E1   | -0.00651  | 0.000663 | 0.032869 |
| 212588_at   | PTPRC    | -0.01578  | 0.000356 | 0.023915 |
| 212650_at   | EHBP1    | 0.004762  | 0.000514 | 0.028468 |
| 212701_at   | TLN2     | 0.017839  | 1.48E-05 | 0.006378 |
| 212703_at   | TLN2     | 0.018334  | 4.21E-07 | 0.003261 |
| 212741_at   | MAOA     | 0.012752  | 9.71E-05 | 0.014938 |
| 212750_at   | PPP1R16B | 0.019805  | 7.11E-05 | 0.012597 |
| 212806_at   | PRUNE2   | 0.01299   | 0.000435 | 0.026069 |
| 212857_x_at | SUB1     | -0.00513  | 0.00023  | 0.021    |
| 212874_at   | APOE     | 0.012843  | 0.000212 | 0.020649 |
| 212883_at   | APOE     | 0.022596  | 5.76E-05 | 0.011262 |
| 212884_x_at | APOE     | 0.01224   | 0.00028  | 0.022442 |
| 212906_at   | GRAMD1B  | 0.013779  | 0.00015  | 0.017365 |
| 212950_at   | GPR116   | 0.011602  | 0.000323 | 0.023086 |
| 212967_x_at | NAP1L1   | -5.88E-03 | 0.000819 | 0.037241 |
| 213033_s_at | NFIB     | 0.00691   | 0.000848 | 0.037856 |
| 213037_x_at | STAU1    | 0.006973  | 0.000666 | 0.032884 |
| 213050_at   | COBL     | 7.45E-03  | 0.000799 | 0.036754 |
| 213132_s_at | MCAT     | 0.009223  | 0.000306 | 0.022868 |
| 213140_s_at | SS18L1   | 0.00857   | 0.001049 | 0.041822 |
| 213151_s_at | SEPT7    | -0.00759  | 0.001325 | 0.047503 |
| 213193_x_at | TRBC1    | -0.02292  | 0.000415 | 0.025723 |
| 213264_at   | PCBP2    | 0.007114  | 0.000998 | 0.041136 |
| 213274_s_at | CTSB     | 0.011997  | 0.000931 | 0.03994  |
| 213293_s_at | TRIM22   | -0.01326  | 0.000479 | 0.027487 |
| 213332_at   | PAPPA2   | -0.01556  | 0.000421 | 0.025723 |
| 213362_at   | PTPRD    | 0.008618  | 0.000194 | 0.019338 |
| 213377_x_at | RPS12    | -0.00833  | 2.14E-05 | 0.00746  |
| 213381_at   | C10orf72 | 0.015418  | 0.000356 | 0.023915 |
| 213383_at   | SBF1     | 0.007452  | 0.000918 | 0.039698 |
| 213509_x_at | CES2     | 0.012671  | 0.001408 | 0.04895  |

|             |              |          |          |          |
|-------------|--------------|----------|----------|----------|
| 213513_x_at | ARPC2        | -0.00558 | 0.000209 | 0.02041  |
| 213603_s_at | RAC2         | -0.01407 | 0.000422 | 0.025723 |
| 213642_at   |              | -0.00525 | 0.001229 | 0.046175 |
| 213657_s_at |              | 0.012937 | 0.000592 | 0.030676 |
| 213664_at   | SLC1A1       | 1.39E-02 | 0.000124 | 0.016422 |
| 213687_s_at | RPL35A       | -0.006   | 0.00034  | 0.023726 |
| 213697_at   | HIPK3        | 0.00727  | 0.001279 | 0.047094 |
| 213705_at   | LOC100509558 | 0.008025 | 9.41E-05 | 0.014654 |
| 213792_s_at | INSR         | 0.012044 | 8.36E-05 | 0.01349  |
| 213857_s_at | CD47         | -0.00921 | 0.000299 | 0.022805 |
| 213864_s_at | NAP1L1       | -0.00587 | 0.000282 | 0.022442 |
| 213869_x_at | THY1         | 0.016086 | 5.4E-05  | 0.010842 |
| 213944_x_at | GNA11        | 0.005941 | 0.000846 | 0.037844 |
| 213975_s_at | LYZ          | -0.02671 | 1.25E-05 | 0.006249 |
| 214000_s_at | RGS10        | -0.01634 | 0.000233 | 0.021068 |
| 214001_x_at |              | -0.00525 | 0.001158 | 0.044793 |
| 214039_s_at | LAPTM4B      | -0.0076  | 0.001065 | 0.042362 |
| 214041_x_at | RPL37A       | -0.00333 | 0.001391 | 0.048498 |
| 214066_x_at | NPR2         | 0.00661  | 0.000861 | 0.038159 |
| 214069_at   | ACSM2A       | 0.018764 | 0.000309 | 0.022884 |
| 214088_s_at | FUT3         | 0.017655 | 8.34E-07 | 0.003261 |
| 214181_x_at | LST1         | -0.01437 | 0.000743 | 0.035498 |
| 214235_at   | CYP3A5       | 0.011648 | 0.000305 | 0.022868 |
| 214261_s_at | ADH6         | 0.014764 | 0.000328 | 0.023287 |
| 214274_s_at | ACAA1        | 0.014902 | 9.15E-06 | 0.006249 |
| 214321_at   | NOV          | -0.01345 | 0.000295 | 0.022721 |
| 214347_s_at | DDC          | 0.017264 | 0.000735 | 0.035259 |
| 214423_x_at | ALDOB        | 0.019362 | 0.000352 | 0.023817 |
| 214424_s_at | ALDOB        | 0.027061 | 0.000222 | 0.020805 |
| 214428_x_at | C4A          | 0.011106 | 0.00075  | 0.035626 |
| 214453_s_at | IFI44        | -0.01498 | 0.000191 | 0.019262 |
| 214470_at   | KLRB1        | -0.01289 | 0.000568 | 0.030043 |
| 214475_x_at | CAPN3        | 0.018298 | 0.000187 | 0.018973 |
| 214490_at   | ARSF         | 0.016164 | 6.58E-05 | 0.012415 |
| 214574_x_at | LST1         | -0.01574 | 0.000193 | 0.019319 |
| 214604_at   | HOXD11       | -0.00641 | 0.001391 | 0.048498 |
| 214681_at   | GK           | 0.014133 | 0.000653 | 0.032779 |
| 214696_at   | C17orf91     | 0.012154 | 9.16E-05 | 0.014467 |
| 214724_at   | DIXDC1       | 0.00871  | 0.000316 | 0.022884 |
| 214776_x_at | XYLB         | 0.01425  | 0.000168 | 0.018224 |
| 214778_at   | MEGF8        | 0.007163 | 0.000964 | 0.040294 |
| 214807_at   |              | 0.008277 | 0.000961 | 0.040294 |
| 214864_s_at | GRHPR        | 0.010177 | 0.000251 | 0.021434 |
| 214905_at   | RASGRF1      | 0.005149 | 0.000183 | 0.018894 |
| 214999_s_at | RAB11FIP3    | 0.024998 | 8.45E-06 | 0.006249 |
| 215005_at   | NECAB2       | 0.015428 | 2.55E-05 | 0.008012 |
| 215210_s_at | DLST         | 0.009031 | 0.00025  | 0.021434 |
| 215274_at   | SLC12A3      | 0.019333 | 8.72E-06 | 0.006249 |
| 215363_x_at | FOLH1        | 0.019003 | 0.000804 | 0.036948 |

|             |           |           |          |          |
|-------------|-----------|-----------|----------|----------|
| 215450_at   | SNRPE     | -0.0046   | 0.000157 | 0.017604 |
| 215471_s_at | MAP7      | 0.009994  | 0.001038 | 0.041806 |
| 215726_s_at | CYB5A     | 0.010398  | 0.000515 | 0.028468 |
| 215758_x_at | ZNF93     | -0.00754  | 8.61E-05 | 0.013804 |
| 215783_s_at | ALPL      | 0.014456  | 0.000533 | 0.029198 |
| 215820_x_at | SNX13     | 0.005373  | 0.000341 | 0.023726 |
| 215966_x_at | GK3P      | 0.016165  | 5.92E-05 | 0.011464 |
| 215975_x_at |           | 0.015474  | 0.000107 | 0.015261 |
| 215977_x_at | GK        | 0.016519  | 0.000454 | 0.026587 |
| 216024_at   | DNM2      | 0.007837  | 7.99E-05 | 0.013284 |
| 216191_s_at | TRDV3     | -1.38E-02 | 2.13E-05 | 0.00746  |
| 216223_at   | CPN2      | 0.019292  | 0.000415 | 0.025723 |
| 216308_x_at | GRHPR     | 0.010942  | 0.000379 | 0.024843 |
| 216342_x_at |           | -0.00522  | 1.27E-05 | 0.006249 |
| 216379_x_at | CD24      | -0.00817  | 0.000435 | 0.026069 |
| 216425_at   |           | 0.011679  | 0.000117 | 0.01593  |
| 216489_at   | TRPM3     | 0.012111  | 0.00075  | 0.035626 |
| 216505_x_at |           | -0.00762  | 0.000416 | 0.025723 |
| 216515_x_at | MIR1244-1 | -0.00495  | 0.000769 | 0.036233 |
| 216526_x_at | HLA-C     | -0.0069   | 0.001327 | 0.047503 |
| 216599_x_at | SLC22A6   | 0.021461  | 7.84E-05 | 0.013269 |
| 216600_x_at | ALDOB     | 0.017874  | 0.000766 | 0.036138 |
| 216823_at   | RPS3A     | -0.00846  | 1.08E-05 | 0.006249 |
| 216886_at   | CHRNA4    | 0.012757  | 4.11E-05 | 0.009128 |
| 216910_at   | XPNPEP2   | 0.031797  | 3.8E-06  | 0.006049 |
| 217023_x_at | TPSAB1    | -0.01244  | 0.000832 | 0.037527 |
| 217167_x_at | GK        | 0.017685  | 3.06E-05 | 0.008212 |
| 217238_s_at | ALDOB     | 0.017539  | 0.000587 | 0.030616 |
| 217256_x_at |           | -0.00446  | 0.001229 | 0.046175 |
| 217257_at   | SH3BP2    | 0.015864  | 1.5E-06  | 0.003715 |
| 217313_at   |           | -0.00617  | 0.000125 | 0.016422 |
| 217319_x_at | CYP4A22   | 0.019329  | 2.94E-05 | 0.008212 |
| 217328_at   |           | -0.00548  | 0.000358 | 0.023954 |
| 217483_at   | FOLH1     | 0.014581  | 0.000448 | 0.026549 |
| 217530_at   | SLC34A1   | 0.022793  | 1.64E-05 | 0.006378 |
| 217547_x_at | ZNF675    | -6.07E-03 | 0.001436 | 0.049454 |
| 217557_s_at | CPM       | 0.009723  | 0.000316 | 0.022884 |
| 217612_at   | TIMM50    | 0.008738  | 0.000987 | 0.041017 |
| 217728_at   | S100A6    | -0.0174   | 4.51E-07 | 0.003261 |
| 217762_s_at | RAB31     | -0.01088  | 0.001037 | 0.041806 |
| 217838_s_at | EVL       | -0.00771  | 0.001222 | 0.046175 |
| 217874_at   | SUCLG1    | 0.009594  | 0.000735 | 0.035259 |
| 217914_at   | TPCN1     | 0.009857  | 0.000539 | 0.029224 |
| 217973_at   | DCXR      | 0.013802  | 0.001368 | 0.048073 |
| 217975_at   | WBP5      | -0.00772  | 0.00078  | 0.036422 |
| 218003_s_at | FKBP3     | -0.00406  | 0.001206 | 0.045829 |
| 218094_s_at | DBNDD2    | -0.01071  | 0.000318 | 0.022914 |
| 218124_at   | RETSAT    | 0.00969   | 1.22E-05 | 0.006249 |
| 218157_x_at | CDC42SE1  | -9.46E-03 | 0.001244 | 0.046551 |

|             |          |           |          |          |
|-------------|----------|-----------|----------|----------|
| 218184_at   | TULP4    | 0.005124  | 0.000423 | 0.025723 |
| 218192_at   | IP6K2    | -0.00625  | 0.000376 | 0.024754 |
| 218245_at   | TSKU     | 0.014643  | 1.02E-06 | 0.003261 |
| 218272_at   | TTC38    | 0.013506  | 4.37E-05 | 0.009271 |
| 218487_at   | ALAD     | 0.012331  | 0.000226 | 0.020845 |
| 218611_at   | IER5     | -0.01033  | 0.000874 | 0.038533 |
| 218667_at   | PJA1     | -0.00779  | 0.00055  | 0.029516 |
| 218844_at   | ACSF2    | 0.017294  | 1.11E-05 | 0.006249 |
| 218858_at   | DEPDC6   | -0.01102  | 1.35E-05 | 0.006249 |
| 218872_at   | TESC     | -0.01406  | 8.03E-06 | 0.006249 |
| 218960_at   | TMPRSS4  | -0.0117   | 0.00133  | 0.047503 |
| 218983_at   | C1RL     | -0.00953  | 0.000875 | 0.038541 |
| 219076_s_at | PXMP2    | 0.012567  | 0.000131 | 0.016713 |
| 219119_at   | NAA38    | -0.00853  | 0.000549 | 0.029516 |
| 219140_s_at | RBP4     | 0.022616  | 0.000426 | 0.025814 |
| 219161_s_at | CKLF     | -0.01292  | 2.93E-05 | 0.008212 |
| 219194_at   | SEMA4G   | 0.009937  | 0.000978 | 0.040728 |
| 219215_s_at | SLC39A4  | 0.014908  | 3.7E-05  | 0.008648 |
| 219243_at   | GIMAP4   | -0.01146  | 0.00022  | 0.020779 |
| 219268_at   | ETNK2    | 0.015836  | 6.71E-05 | 0.012555 |
| 219281_at   | MSRA     | 0.016953  | 6.74E-06 | 0.006249 |
| 219440_at   | RAI2     | -0.01173  | 0.000215 | 0.020755 |
| 219527_at   | MOSC2    | 0.015483  | 6.42E-06 | 0.006249 |
| 219594_at   | NINJ2    | -1.01E-02 | 9.59E-06 | 0.006249 |
| 219610_at   | RGNEF    | 0.00948   | 0.000759 | 0.035991 |
| 219630_at   | PDZK1IP1 | 0.018041  | 0.000284 | 0.022442 |
| 219632_s_at | TRPV1    | 0.010926  | 0.00011  | 0.015445 |
| 219655_at   | C7orf10  | 0.013644  | 0.000282 | 0.022442 |
| 219705_at   | QSER1    | -0.00665  | 0.000714 | 0.034727 |
| 219722_s_at | GDPD3    | 0.01195   | 0.001347 | 0.047697 |
| 219723_x_at | AGPAT3   | 0.012108  | 0.000412 | 0.025723 |
| 219739_at   | RNF186   | 0.021877  | 1.12E-05 | 0.006249 |
| 219773_at   | NOX4     | 0.016147  | 0.00143  | 0.049386 |
| 219796_s_at | CDHR5    | 0.012321  | 0.000941 | 0.039986 |
| 219803_at   | ANGPTL3  | 0.024502  | 7.87E-05 | 0.013269 |
| 219873_at   | COLEC11  | 0.013739  | 0.000165 | 0.018103 |
| 219891_at   | PGPEP1   | 0.011251  | 0.000152 | 0.017365 |
| 219902_at   | BHMT2    | 0.016731  | 1.49E-05 | 0.006378 |
| 219915_s_at | SLC16A10 | 0.014069  | 0.000794 | 0.036636 |
| 219954_s_at | GBA3     | 0.013914  | 0.001344 | 0.047677 |
| 219986_s_at | ACAD10   | 0.008939  | 0.00086  | 0.038159 |
| 220005_at   | P2RY13   | -0.01141  | 0.000562 | 0.029972 |
| 220020_at   | XPNPEP3  | 0.009666  | 6.42E-05 | 0.012222 |
| 220061_at   | ACSM5    | 0.019857  | 8.89E-06 | 0.006249 |
| 220075_s_at | CDHR5    | 0.027675  | 1.31E-05 | 0.006249 |
| 220094_s_at | CCDC90A  | 0.007498  | 0.001189 | 0.045419 |
| 220100_at   | SLC22A11 | 0.017888  | 0.000418 | 0.025723 |
| 220135_s_at | SLC7A9   | 0.024766  | 1.96E-05 | 0.007077 |
| 220149_at   | C2orf54  | 0.020748  | 7.12E-05 | 0.012597 |

|             |              |          |          |          |
|-------------|--------------|----------|----------|----------|
| 220178_at   | C19orf28     | 0.011693 | 9.84E-05 | 0.014938 |
| 220186_s_at | CDHR2        | 1.77E-02 | 7.01E-07 | 0.003261 |
| 220303_at   | PDZD3        | 1.33E-02 | 3.32E-05 | 0.008299 |
| 220310_at   | TUBAL3       | 0.020366 | 3.66E-05 | 0.008648 |
| 220382_s_at | ARHGAP28     | 0.013676 | 0.000782 | 0.036422 |
| 220507_s_at | UPB1         | 0.024939 | 1.4E-05  | 0.006364 |
| 220591_s_at | EFHC2        | -0.01039 | 0.000246 | 0.021373 |
| 220604_x_at | FTCD         | 0.022412 | 4.31E-06 | 0.006249 |
| 220642_x_at | GPR89A       | 0.00962  | 0.000824 | 0.037241 |
| 220671_at   | CCRN4L       | 0.013471 | 0.000287 | 0.022442 |
| 220727_at   | KCNK10       | 0.014881 | 1.94E-05 | 0.007077 |
| 220740_s_at | SLC12A6      | 0.012269 | 2.8E-06  | 0.005634 |
| 220753_s_at | CRYL1        | 0.013241 | 0.000451 | 0.026587 |
| 220773_s_at | GPHN         | 0.014299 | 0.000172 | 0.018509 |
| 220801_s_at | HAO2         | 0.024555 | 6.29E-05 | 0.012075 |
| 220892_s_at | PSAT1        | 0.020079 | 0.000346 | 0.023726 |
| 220931_at   | MGC5590      | 0.012111 | 2.76E-05 | 0.008193 |
| 220951_s_at | A1CF         | 0.017803 | 0.001176 | 0.045307 |
| 221004_s_at | ITM2C        | -0.01296 | 0.000939 | 0.039986 |
| 221163_s_at | MLXIPL       | 0.007921 | 0.000497 | 0.027839 |
| 221188_s_at | CIDEB        | 0.010035 | 0.000117 | 0.01593  |
| 221194_s_at | RNFT1        | 0.007217 | 0.000294 | 0.022721 |
| 221246_x_at | TNS1         | 0.007078 | 0.000278 | 0.022442 |
| 221298_s_at | SLC22A8      | 0.025798 | 8.26E-05 | 0.01349  |
| 221305_s_at | UGT1A8       | 0.027806 | 3.45E-06 | 0.005905 |
| 221474_at   | MYL12B       | -0.00603 | 0.000142 | 0.017117 |
| 221552_at   | ABHD6        | 0.01353  | 8.31E-05 | 0.01349  |
| 221565_s_at | CALHM2       | -0.00716 | 9.96E-05 | 0.014938 |
| 221572_s_at | SLC26A6      | 0.011713 | 1.6E-05  | 0.006378 |
| 221588_x_at | ALDH6A1      | 0.01539  | 0.000455 | 0.026592 |
| 221589_s_at | LOC100506517 | 0.013652 | 0.001111 | 0.043657 |
| 221590_s_at | ALDH6A1      | 0.016335 | 0.000295 | 0.022721 |
| 221605_s_at | PIPOX        | 0.02134  | 0.000183 | 0.018894 |
| 221636_s_at | MOSC2        | 0.013734 | 2.35E-05 | 0.007691 |
| 221666_s_at | PYCARD       | -0.0119  | 0.001225 | 0.046175 |
| 221679_s_at | ABHD6        | 0.02136  | 8.95E-06 | 0.006249 |
| 221879_at   | CALML4       | 0.011137 | 0.000905 | 0.039317 |
| 221881_s_at | CLIC4        | 0.009173 | 0.00101  | 0.041274 |
| 221943_x_at | RPL38        | -0.00481 | 0.000116 | 0.015916 |
| 222001_x_at | LOC728855    | -0.00605 | 0.001328 | 0.047503 |
| 222049_s_at | RBP4         | 0.023656 | 0.000486 | 0.027736 |
| 222078_at   | PKLR         | 0.015993 | 0.000167 | 0.018224 |
| 222083_at   | GLYAT        | 0.017102 | 0.000969 | 0.040417 |
| 222257_s_at | ACE2         | 0.016484 | 0.001329 | 0.047503 |
| 266_s_at    | CD24         | -0.01116 | 3.76E-05 | 0.008648 |
| 33494_at    | ETFDH        | 0.009311 | 0.000835 | 0.037587 |
| 36994_at    | ATP6V0C      | 0.007093 | 9.3E-05  | 0.014592 |
| 37201_at    | ITIH4        | 0.00814  | 0.000564 | 0.029991 |
| 37424_at    | CCHCR1       | -0.006   | 0.000128 | 0.016535 |

|                      |              |          |          |          |
|----------------------|--------------|----------|----------|----------|
| 40016_g_at           | MAST4        | 0.010368 | 0.000109 | 0.015445 |
| 41386_i_at           | KDM6B        | 0.010613 | 0.001432 | 0.049386 |
| 41577_at             | PPP1R16B     | 1.63E-02 | 8.81E-05 | 0.01402  |
| 41660_at             | CELSR1       | 0.011763 | 1.13E-05 | 0.006249 |
| 42361_g_at           | CCHCR1       | -0.00724 | 0.000542 | 0.029224 |
| 45288_at             | ABHD6        | 0.011905 | 0.001283 | 0.047094 |
| 52940_at             | LOC100294402 | 0.010642 | 0.001151 | 0.044641 |
| 57539_at             | ZGPAT        | 0.013946 | 0.001251 | 0.046616 |
| 64408_s_at           | CALML4       | 0.011634 | 0.000789 | 0.036534 |
| 65718_at             | GPR124       | -0.00532 | 0.000237 | 0.021158 |
| 89977_at             | ACSM5        | 0.018855 | 4.97E-05 | 0.010166 |
| AFFX-r2-Ec-bioB-M_at |              | 0.018783 | 0.001419 | 0.049174 |
