# Supplementary material for: Human Kidney Tubule-Specific Gene Expression Based Dissection of Chronic Kidney Disease Traits
Source: PubMed Central journal article supplement — eBioMedicine. 2017 Sep 17;24:267–76. doi: 10.1016/j.ebiom.2017.09.014 (PMC5652292; doi:10.1016/j.ebiom.2017.09.014), 2017-09-17
Supplement: mmc3.pdf [file mmc3.pdf]

**Table S3**

| <b>probe</b> | <b>gene</b> | <b>effect</b> | <b>p.val</b> | <b>FDR</b> |
|--------------|-------------|---------------|--------------|------------|
| 1007_s_at    | DDR1        | 0.006471      | 5.10E-03     | 2.63E-02   |
| 117_at       | HSPA6       | 0.011635      | 1.17E-03     | 7.85E-03   |
| 1294_at      | UBA7        | 0.008274      | 3.17E-04     | 2.64E-03   |
| 1405_i_at    | CCL5        | 0.03356       | 6.04E-15     | 1.92E-12   |
| 177_at       | PLD1        | -0.01365      | 2.54E-07     | 5.19E-06   |
| 200002_at    | RPL35       | 0.009088      | 2.74E-03     | 1.58E-02   |
| 200003_s_at  | RPL28       | 0.00973       | 2.34E-03     | 1.39E-02   |
| 200010_at    | RPL11       | 0.005959      | 4.26E-03     | 2.27E-02   |
| 200012_x_at  | RPL21       | 0.005318      | 5.67E-05     | 6.08E-04   |
| 200017_at    | RPS27A      | 0.004547      | 3.02E-03     | 1.72E-02   |
| 200018_at    | RPS13       | 0.005829      | 6.60E-05     | 6.91E-04   |
| 200019_s_at  | FAU         | 0.008465      | 7.73E-04     | 5.62E-03   |
| 200022_at    | RPL18       | 0.01283       | 5.07E-03     | 2.62E-02   |
| 200024_at    | RPS5        | 0.01022       | 9.78E-03     | 4.39E-02   |
| 200025_s_at  | RPL27       | 0.005465      | 1.82E-04     | 1.65E-03   |
| 200028_s_at  | STARD7      | -0.00529      | 1.40E-04     | 1.32E-03   |
| 200030_s_at  | SLC25A3     | -0.00651      | 8.58E-06     | 1.15E-04   |
| 200031_s_at  | RPS11       | 0.007061      | 5.51E-03     | 2.79E-02   |
| 200032_s_at  | RPL9        | 0.007152      | 1.57E-07     | 3.40E-06   |
| 200036_s_at  | RPL10A      | 0.006259      | 3.68E-04     | 3.00E-03   |
| 200038_s_at  | RPL17       | 0.006099      | 6.92E-03     | 3.34E-02   |
| 200042_at    | C22orf28    | -0.0065       | 1.59E-04     | 1.48E-03   |
| 200043_at    | ERH         | 0.002934      | 7.87E-03     | 3.69E-02   |
| 200059_s_at  | RHOA        | 0.008596      | 4.64E-07     | 8.88E-06   |
| 200061_s_at  | RPS24       | 0.004876      | 2.34E-04     | 2.05E-03   |
| 200062_s_at  | RPL30       | 0.008806      | 5.02E-05     | 5.48E-04   |
| 200063_s_at  | NPM1        | 0.002705      | 2.00E-03     | 1.23E-02   |
| 200073_s_at  | HNRNPD      | 0.003836      | 6.97E-04     | 5.17E-03   |
| 200074_s_at  | RPL14       | 0.005942      | 2.91E-03     | 1.66E-02   |
| 200080_s_at  | H3F3A       | 0.003539      | 3.05E-03     | 1.73E-02   |
| 200081_s_at  | RPS6        | 0.007246      | 8.43E-03     | 3.90E-02   |
| 200088_x_at  | RPL12       | 0.006408      | 4.62E-05     | 5.08E-04   |
| 200092_s_at  | RPL37       | 0.004556      | 7.33E-06     | 1.01E-04   |
| 200095_x_at  | RPS10       | 0.006442      | 7.90E-06     | 1.08E-04   |
| 200098_s_at  | ANAPC5      | -0.00661      | 2.24E-04     | 1.98E-03   |
| 200099_s_at  | RPS3A       | 0.007033      | 2.01E-07     | 4.22E-06   |
| 200597_at    | EIF3A       | -0.00721      | 5.02E-03     | 2.59E-02   |
| 200606_at    | DSP         | -0.00676      | 5.04E-04     | 3.94E-03   |
| 200614_at    | CLTC        | -0.00583      | 9.94E-05     | 9.87E-04   |
| 200616_s_at  | MLEC        | -0.00677      | 4.22E-03     | 2.26E-02   |
| 200617_at    | MLEC        | -0.00851      | 8.94E-03     | 4.09E-02   |
| 200621_at    | CSRP1       | 0.007942      | 6.47E-06     | 9.07E-05   |
| 200632_s_at  | NDRG1       | -0.00851      | 9.80E-08     | 2.22E-06   |
| 200633_at    | UBB         | -0.00313      | 1.63E-03     | 1.03E-02   |
| 200639_s_at  | YWHAZ       | 0.004272      | 9.42E-03     | 4.26E-02   |
| 200640_at    | YWHAZ       | 0.005385      | 1.23E-04     | 1.18E-03   |
| 200641_s_at  | YWHAZ       | 0.006293      | 2.79E-04     | 2.37E-03   |

|             |          |          |          |          |
|-------------|----------|----------|----------|----------|
| 200642_at   | SOD1     | -0.00651 | 1.19E-06 | 2.04E-05 |
| 200644_at   | MARCKSL1 | 0.017705 | 1.60E-11 | 1.31E-09 |
| 200648_s_at | GLUL     | 0.009067 | 5.58E-03 | 2.82E-02 |
| 200649_at   | NUCB1    | -0.01048 | 1.07E-02 | 4.73E-02 |
| 200653_s_at | CALM1    | -0.00562 | 6.97E-07 | 1.27E-05 |
| 200655_s_at | CALM1    | -0.00573 | 3.46E-07 | 6.83E-06 |
| 200657_at   | SLC25A5  | -0.00914 | 1.79E-10 | 9.85E-09 |
| 200659_s_at | PHB      | -0.01112 | 1.57E-05 | 1.96E-04 |
| 200660_at   | S100A11  | 0.014616 | 3.01E-07 | 6.06E-06 |
| 200661_at   | CTSA     | -0.01099 | 1.09E-03 | 7.44E-03 |
| 200666_s_at | DNAJB1   | -0.00872 | 9.16E-04 | 6.49E-03 |
| 200674_s_at | RPL32    | 0.00483  | 3.11E-03 | 1.76E-02 |
| 200675_at   | CD81     | 0.009115 | 9.50E-04 | 6.67E-03 |
| 200679_x_at | HMGB1    | 0.007994 | 4.57E-03 | 2.41E-02 |
| 200680_x_at | HMGB1    | 0.003315 | 1.04E-04 | 1.02E-03 |
| 200684_s_at | UBE2L3   | -0.00742 | 1.35E-03 | 8.86E-03 |
| 200690_at   | HSPA9    | -0.01272 | 1.16E-06 | 1.99E-05 |
| 200691_s_at | HSPA9    | -0.01234 | 1.78E-11 | 1.42E-09 |
| 200692_s_at | HSPA9    | -0.00734 | 3.52E-07 | 6.94E-06 |
| 200705_s_at | EEF1B2   | 0.003048 | 3.50E-03 | 1.94E-02 |
| 200708_at   | GOT2     | -0.00818 | 4.53E-07 | 8.72E-06 |
| 200715_x_at | RPL13A   | 0.006601 | 2.24E-05 | 2.68E-04 |
| 200716_x_at | RPL13A   | 0.008921 | 5.42E-03 | 2.75E-02 |
| 200727_s_at | ACTR2    | 0.006738 | 9.10E-03 | 4.15E-02 |
| 200729_s_at | ACTR2    | 0.005915 | 8.03E-03 | 3.76E-02 |
| 200737_at   | PGK1     | -0.00692 | 8.43E-03 | 3.90E-02 |
| 200741_s_at | RPS27    | 0.009429 | 2.17E-05 | 2.61E-04 |
| 200742_s_at | TPP1     | -0.00924 | 6.07E-06 | 8.55E-05 |
| 200743_s_at | TPP1     | -0.01061 | 1.53E-06 | 2.53E-05 |
| 200758_s_at | NFE2L1   | -0.0105  | 8.00E-05 | 8.15E-04 |
| 200759_x_at | NFE2L1   | -0.00859 | 4.30E-06 | 6.31E-05 |
| 200760_s_at | ARL6IP5  | 0.005205 | 1.81E-03 | 1.13E-02 |
| 200767_s_at | FAM120A  | -0.00824 | 1.08E-02 | 4.78E-02 |
| 200768_s_at | MAT2A    | -0.01106 | 1.44E-11 | 1.21E-09 |
| 200769_s_at | MAT2A    | -0.00895 | 5.95E-04 | 4.53E-03 |
| 200771_at   | LAMC1    | 0.008091 | 1.19E-04 | 1.14E-03 |
| 200772_x_at | PTMA     | 0.009607 | 1.02E-06 | 1.78E-05 |
| 200773_x_at | PTMA     | 0.008354 | 1.79E-06 | 2.91E-05 |
| 200774_at   | FAM120A  | -0.00435 | 5.46E-04 | 4.22E-03 |
| 200778_s_at | SEPT2    | 0.003973 | 8.22E-03 | 3.83E-02 |
| 200781_s_at | RPS15A   | 0.00664  | 6.25E-04 | 4.72E-03 |
| 200782_at   | ANXA5    | 0.008903 | 5.93E-04 | 4.52E-03 |
| 200783_s_at | STMN1    | 0.00624  | 1.62E-04 | 1.50E-03 |
| 200786_at   | PSMB7    | -0.00569 | 4.79E-03 | 2.50E-02 |
| 200787_s_at | PEA15    | 0.008418 | 4.86E-03 | 2.53E-02 |
| 200788_s_at | PEA15    | 0.008407 | 4.51E-05 | 4.97E-04 |
| 200789_at   | ECH1     | -0.01025 | 1.83E-04 | 1.66E-03 |
| 200790_at   | ODC1     | -0.00851 | 5.19E-05 | 5.62E-04 |
| 200791_s_at | IQGAP1   | 0.009739 | 2.35E-06 | 3.71E-05 |

|             |         |          |          |          |
|-------------|---------|----------|----------|----------|
| 200793_s_at | ACO2    | -0.02214 | 8.79E-10 | 3.70E-08 |
| 200804_at   | TMBIM6  | -0.01125 | 4.19E-05 | 4.66E-04 |
| 200806_s_at | HSPD1   | -0.009   | 1.82E-04 | 1.66E-03 |
| 200807_s_at | HSPD1   | -0.00957 | 2.52E-12 | 2.73E-10 |
| 200808_s_at | ZYX     | 0.01073  | 2.88E-06 | 4.42E-05 |
| 200809_x_at | RPL12   | 0.005797 | 2.50E-04 | 2.16E-03 |
| 200817_x_at | RPS10   | 0.008596 | 3.98E-06 | 5.89E-05 |
| 200818_at   | ATP5O   | -0.00565 | 4.96E-04 | 3.89E-03 |
| 200827_at   | PLOD1   | -0.01105 | 4.10E-06 | 6.06E-05 |
| 200831_s_at | SCD     | -0.01327 | 1.58E-05 | 1.97E-04 |
| 200832_s_at | SCD     | -0.02446 | 2.69E-07 | 5.48E-06 |
| 200838_at   | CTSB    | -0.01344 | 4.64E-06 | 6.73E-05 |
| 200839_s_at | CTSB    | -0.01147 | 2.09E-09 | 7.78E-08 |
| 200848_at   | AHCYL1  | -0.00786 | 8.51E-03 | 3.93E-02 |
| 200849_s_at | AHCYL1  | -0.00833 | 3.64E-04 | 2.97E-03 |
| 200850_s_at | AHCYL1  | -0.0061  | 1.07E-02 | 4.71E-02 |
| 200858_s_at | RPS8    | 0.007755 | 2.19E-06 | 3.49E-05 |
| 200861_at   | CNOT1   | -0.00314 | 2.19E-03 | 1.32E-02 |
| 200863_s_at | RAB11A  | 0.005085 | 4.13E-03 | 2.22E-02 |
| 200869_at   | RPL18A  | 0.017588 | 2.69E-04 | 2.30E-03 |
| 200870_at   | STRAP   | -0.00408 | 8.16E-03 | 3.80E-02 |
| 200872_at   | S100A10 | 0.012403 | 1.98E-08 | 5.44E-07 |
| 200886_s_at | PGAM1   | -0.0057  | 3.53E-04 | 2.89E-03 |
| 200887_s_at | STAT1   | 0.008856 | 1.19E-03 | 7.95E-03 |
| 200892_s_at | TRA2B   | 0.005836 | 5.85E-04 | 4.47E-03 |
| 200895_s_at | FKBP4   | -0.00641 | 9.20E-03 | 4.18E-02 |
| 200896_x_at | HDGF    | -0.00444 | 6.89E-07 | 1.26E-05 |
| 200897_s_at | PALLD   | 0.009046 | 1.23E-05 | 1.58E-04 |
| 200903_s_at | AHCY    | -0.01944 | 4.30E-11 | 2.95E-09 |
| 200905_x_at | HLA-E   | 0.008767 | 6.44E-04 | 4.84E-03 |
| 200906_s_at | PALLD   | 0.007484 | 6.02E-04 | 4.57E-03 |
| 200907_s_at | PALLD   | 0.008521 | 1.63E-05 | 2.02E-04 |
| 200908_s_at | RPLP2   | 0.007631 | 1.80E-06 | 2.92E-05 |
| 200909_s_at | RPLP2   | 0.010699 | 3.46E-04 | 2.84E-03 |
| 200916_at   | TAGLN2  | 0.010486 | 7.62E-04 | 5.55E-03 |
| 200917_s_at | SRPR    | -0.00759 | 8.79E-04 | 6.28E-03 |
| 200921_s_at | BTG1    | 0.007308 | 7.02E-06 | 9.72E-05 |
| 200924_s_at | SLC3A2  | -0.01114 | 4.03E-05 | 4.53E-04 |
| 200926_at   | RPS23   | 0.003328 | 1.51E-03 | 9.69E-03 |
| 200931_s_at | VCL     | 0.005791 | 9.87E-03 | 4.43E-02 |
| 200933_x_at | RPS4X   | 0.00474  | 2.07E-05 | 2.50E-04 |
| 200934_at   | DEK     | 0.006539 | 3.31E-04 | 2.74E-03 |
| 200937_s_at | RPL5    | 0.005636 | 4.51E-03 | 2.38E-02 |
| 200939_s_at | RERE    | -0.00689 | 8.76E-04 | 6.26E-03 |
| 200943_at   | HMGN1   | 0.006117 | 4.07E-04 | 3.28E-03 |
| 200944_s_at | HMGN1   | 0.003569 | 5.66E-03 | 2.85E-02 |
| 200946_x_at | GLUD1   | -0.01368 | 5.72E-13 | 7.72E-11 |
| 200947_s_at | GLUD1   | -0.01487 | 3.82E-13 | 5.52E-11 |
| 200948_at   | MLF2    | -0.0047  | 4.03E-04 | 3.25E-03 |

|             |          |          |          |          |
|-------------|----------|----------|----------|----------|
| 200949_x_at | RPS20    | 0.004123 | 2.01E-03 | 1.23E-02 |
| 200951_s_at | CCND2    | 0.014835 | 8.77E-13 | 1.14E-10 |
| 200952_s_at | CCND2    | 0.024609 | 3.77E-15 | 1.31E-12 |
| 200953_s_at | CCND2    | 0.027705 | 2.30E-16 | 1.55E-13 |
| 200954_at   | ATP6V0C  | -0.00691 | 1.56E-06 | 2.58E-05 |
| 200955_at   | IMMT     | -0.00808 | 9.25E-06 | 1.23E-04 |
| 200958_s_at | SDCBP    | 0.006015 | 3.03E-04 | 2.54E-03 |
| 200961_at   | SEPHS2   | -0.01166 | 1.24E-15 | 5.65E-13 |
| 200963_x_at | RPL31    | 0.005485 | 1.08E-06 | 1.89E-05 |
| 200974_at   | ACTA2    | 0.012504 | 2.66E-04 | 2.28E-03 |
| 200975_at   | PPT1     | 0.004339 | 3.08E-03 | 1.75E-02 |
| 200978_at   | MDH1     | -0.01227 | 5.15E-11 | 3.47E-09 |
| 200979_at   | PDHA1    | -0.01227 | 1.16E-06 | 2.00E-05 |
| 200980_s_at | PDHA1    | -0.00428 | 6.40E-04 | 4.82E-03 |
| 200984_s_at | CD59     | 0.004767 | 1.04E-02 | 4.61E-02 |
| 200986_at   | SERPING1 | 0.017871 | 6.66E-05 | 6.97E-04 |
| 200993_at   | IPO7     | -0.00402 | 1.10E-02 | 4.83E-02 |
| 200998_s_at | CKAP4    | 0.010134 | 1.93E-05 | 2.35E-04 |
| 200999_s_at | CKAP4    | 0.005413 | 1.07E-02 | 4.74E-02 |
| 201000_at   | AARS     | -0.00613 | 5.95E-03 | 2.96E-02 |
| 201004_at   | SSR4     | 0.014206 | 1.13E-03 | 7.64E-03 |
| 201005_at   | CD9      | 0.008507 | 2.92E-04 | 2.47E-03 |
| 201006_at   | PRDX2    | -0.00338 | 1.09E-02 | 4.80E-02 |
| 201007_at   | HADHB    | -0.00809 | 6.62E-08 | 1.56E-06 |
| 201008_s_at | TXNIP    | 0.009259 | 1.56E-04 | 1.45E-03 |
| 201009_s_at | TXNIP    | 0.012953 | 1.36E-04 | 1.28E-03 |
| 201010_s_at | TXNIP    | 0.009026 | 5.60E-06 | 7.97E-05 |
| 201012_at   | ANXA1    | 0.026229 | 1.06E-12 | 1.32E-10 |
| 201013_s_at | PAICS    | -0.00695 | 1.23E-03 | 8.19E-03 |
| 201020_at   | YWHAH    | 0.011428 | 6.90E-05 | 7.17E-04 |
| 201029_s_at | CD99     | 0.004663 | 4.04E-03 | 2.18E-02 |
| 201030_x_at | LDHB     | -0.00628 | 4.16E-09 | 1.39E-07 |
| 201033_x_at | RPLP0    | 0.009596 | 8.63E-03 | 3.97E-02 |
| 201034_at   | ADD3     | -0.01235 | 8.06E-13 | 1.07E-10 |
| 201035_s_at | HADH     | -0.02005 | 8.29E-10 | 3.51E-08 |
| 201036_s_at | HADH     | -0.02054 | 4.75E-16 | 2.79E-13 |
| 201037_at   | PFKP     | 0.010397 | 8.32E-04 | 5.98E-03 |
| 201040_at   | GNAI2    | 0.007085 | 6.12E-03 | 3.02E-02 |
| 201049_s_at | RPS18    | 0.008853 | 2.56E-05 | 3.01E-04 |
| 201056_at   | GOLGB1   | -0.00626 | 7.71E-06 | 1.05E-04 |
| 201060_x_at | STOM     | -0.00458 | 7.80E-03 | 3.67E-02 |
| 201061_s_at | STOM     | -0.00926 | 3.72E-07 | 7.28E-06 |
| 201063_at   | RCN1     | 0.011282 | 1.46E-06 | 2.42E-05 |
| 201067_at   | PSMC2    | -0.00942 | 4.92E-04 | 3.87E-03 |
| 201069_at   | MMP2     | 0.009766 | 1.87E-05 | 2.28E-04 |
| 201074_at   | SMARCC1  | -0.00921 | 4.06E-03 | 2.18E-02 |
| 201089_at   | ATP6V1B2 | -0.01343 | 3.49E-06 | 5.24E-05 |
| 201090_x_at | TUBA1B   | 0.007377 | 1.41E-03 | 9.18E-03 |
| 201091_s_at | CBX3     | 0.002822 | 8.65E-03 | 3.98E-02 |

|             |          |          |          |          |
|-------------|----------|----------|----------|----------|
| 201093_x_at | SDHA     | -0.00864 | 5.42E-05 | 5.84E-04 |
| 201094_at   | RPS29    | 0.00514  | 7.29E-03 | 3.49E-02 |
| 201099_at   | USP9X    | -0.00519 | 6.49E-03 | 3.17E-02 |
| 201105_at   | LGALS1   | 0.022633 | 2.79E-07 | 5.64E-06 |
| 201107_s_at | THBS1    | 0.011957 | 1.58E-03 | 1.01E-02 |
| 201108_s_at | THBS1    | 0.008739 | 4.83E-03 | 2.52E-02 |
| 201109_s_at | THBS1    | 0.009065 | 5.82E-04 | 4.45E-03 |
| 201110_s_at | THBS1    | 0.011724 | 1.69E-03 | 1.07E-02 |
| 201113_at   | TUFM     | -0.00681 | 3.69E-03 | 2.02E-02 |
| 201115_at   | POLD2    | -0.00669 | 3.44E-03 | 1.91E-02 |
| 201116_s_at | CPE      | 0.011343 | 3.27E-03 | 1.83E-02 |
| 201117_s_at | CPE      | 0.008172 | 6.84E-03 | 3.31E-02 |
| 201120_s_at | PGRMC1   | -0.01086 | 1.31E-05 | 1.67E-04 |
| 201121_s_at | PGRMC1   | -0.00795 | 1.32E-06 | 2.22E-05 |
| 201126_s_at | MGAT1    | 0.005507 | 5.06E-03 | 2.62E-02 |
| 201127_s_at | ACLY     | -0.00805 | 2.11E-05 | 2.55E-04 |
| 201128_s_at | ACLY     | -0.00631 | 7.87E-03 | 3.69E-02 |
| 201134_x_at | COX7C    | -0.00333 | 8.98E-04 | 6.39E-03 |
| 201135_at   | ECHS1    | -0.01932 | 1.24E-13 | 2.01E-11 |
| 201136_at   | PLP2     | 0.024339 | 2.33E-12 | 2.54E-10 |
| 201137_s_at | HLA-DPB1 | 0.028367 | 6.69E-12 | 6.31E-10 |
| 201140_s_at | RAB5C    | -0.00673 | 7.00E-04 | 5.19E-03 |
| 201141_at   | GPNMB    | 0.012107 | 1.46E-03 | 9.45E-03 |
| 201155_s_at | MFN2     | -0.00905 | 2.06E-03 | 1.26E-02 |
| 201156_s_at | RAB5C    | -0.00785 | 3.85E-03 | 2.09E-02 |
| 201157_s_at | NMT1     | -0.00943 | 1.44E-04 | 1.35E-03 |
| 201160_s_at | CSDA     | 0.007751 | 5.61E-04 | 4.31E-03 |
| 201161_s_at | CSDA     | 0.009006 | 1.89E-03 | 1.17E-02 |
| 201163_s_at | IGFBP7   | 0.007566 | 4.28E-05 | 4.74E-04 |
| 201164_s_at | PUM1     | -0.00648 | 3.78E-03 | 2.06E-02 |
| 201178_at   | FBXO7    | -0.00752 | 2.40E-07 | 4.95E-06 |
| 201179_s_at | GNAI3    | 0.006084 | 2.32E-04 | 2.03E-03 |
| 201186_at   | LRPAP1   | -0.00748 | 8.73E-06 | 1.17E-04 |
| 201188_s_at | ITPR3    | 0.014807 | 2.67E-08 | 7.03E-07 |
| 201189_s_at | ITPR3    | 0.008252 | 8.27E-05 | 8.39E-04 |
| 201193_at   | IDH1     | -0.01928 | 5.11E-14 | 9.41E-12 |
| 201200_at   | CREG1    | -0.00364 | 8.43E-03 | 3.90E-02 |
| 201201_at   | CSTB     | 0.00406  | 9.73E-03 | 4.37E-02 |
| 201209_at   | HDAC1    | 0.008589 | 2.47E-03 | 1.46E-02 |
| 201212_at   | LGMN     | -0.01523 | 1.61E-07 | 3.47E-06 |
| 201227_s_at | NDUFB8   | -0.0046  | 1.24E-03 | 8.27E-03 |
| 201241_at   | DDX1     | -0.00308 | 4.10E-03 | 2.20E-02 |
| 201242_s_at | ATP1B1   | -0.01213 | 3.32E-10 | 1.62E-08 |
| 201243_s_at | ATP1B1   | -0.0058  | 2.51E-05 | 2.97E-04 |
| 201244_s_at | RAF1     | -0.00614 | 3.80E-03 | 2.07E-02 |
| 201254_x_at | RPS6     | 0.004649 | 1.85E-03 | 1.15E-02 |
| 201256_at   | COX7A2L  | -0.00284 | 1.10E-03 | 7.49E-03 |
| 201257_x_at | RPS3A    | 0.006642 | 7.42E-08 | 1.73E-06 |
| 201258_at   | RPS16    | 0.00916  | 2.82E-03 | 1.62E-02 |

|             |           |          |          |          |
|-------------|-----------|----------|----------|----------|
| 201261_x_at | BGN       | 0.008473 | 1.11E-02 | 4.88E-02 |
| 201262_s_at | BGN       | 0.008935 | 3.98E-03 | 2.15E-02 |
| 201268_at   | NME1-NME2 | 0.006132 | 1.50E-04 | 1.40E-03 |
| 201272_at   | AKR1B1    | 0.009881 | 1.43E-06 | 2.37E-05 |
| 201278_at   | DAB2      | -0.00772 | 1.16E-06 | 2.00E-05 |
| 201279_s_at | DAB2      | -0.01309 | 2.40E-10 | 1.25E-08 |
| 201280_s_at | DAB2      | -0.01242 | 6.90E-07 | 1.26E-05 |
| 201282_at   | OGDH      | -0.01373 | 5.29E-04 | 4.12E-03 |
| 201284_s_at | APEH      | -0.0087  | 9.98E-04 | 6.93E-03 |
| 201286_at   | SDC1      | -0.01108 | 2.69E-04 | 2.30E-03 |
| 201288_at   | ARHGDI B  | 0.020565 | 1.21E-14 | 3.20E-12 |
| 201289_at   | CYR61     | 0.013935 | 3.36E-04 | 2.78E-03 |
| 201291_s_at | TOP2A     | 0.015992 | 1.86E-06 | 3.01E-05 |
| 201300_s_at | PRNP      | -0.00851 | 1.74E-04 | 1.59E-03 |
| 201301_s_at | ANXA4     | 0.006924 | 8.16E-04 | 5.89E-03 |
| 201305_x_at | ANP32B    | 0.005102 | 1.26E-03 | 8.37E-03 |
| 201306_s_at | ANP32B    | 0.004081 | 6.38E-03 | 3.13E-02 |
| 201310_s_at | C5orf13   | -0.01126 | 8.07E-06 | 1.10E-04 |
| 201313_at   | ENO2      | 0.020074 | 2.21E-09 | 8.13E-08 |
| 201314_at   | STK25     | -0.00496 | 3.89E-03 | 2.11E-02 |
| 201315_x_at | IFITM2    | 0.026319 | 3.09E-08 | 8.00E-07 |
| 201318_s_at | MYL12A    | 0.005102 | 1.10E-04 | 1.08E-03 |
| 201319_at   | MYL12A    | 0.006809 | 1.45E-08 | 4.14E-07 |
| 201322_at   | ATP5B     | -0.00931 | 8.67E-03 | 3.98E-02 |
| 201323_at   | EBNA1BP2  | -0.00528 | 4.47E-04 | 3.55E-03 |
| 201324_at   | EMP1      | 0.0118   | 3.43E-04 | 2.82E-03 |
| 201325_s_at | EMP1      | 0.009236 | 1.57E-05 | 1.95E-04 |
| 201334_s_at | ARHGEF12  | -0.00608 | 2.11E-03 | 1.28E-02 |
| 201339_s_at | SCP2      | -0.00926 | 7.98E-07 | 1.43E-05 |
| 201341_at   | ENC1      | 0.007375 | 5.14E-03 | 2.64E-02 |
| 201347_x_at | GRHPR     | -0.01709 | 4.67E-10 | 2.16E-08 |
| 201348_at   | GPX3      | -0.0086  | 2.03E-07 | 4.26E-06 |
| 201349_at   | SLC9A3R1  | -0.01757 | 1.87E-15 | 7.19E-13 |
| 201368_at   | ZFP36L2   | 0.006767 | 1.04E-05 | 1.36E-04 |
| 201369_s_at | ZFP36L2   | 0.006027 | 1.67E-03 | 1.05E-02 |
| 201384_s_at | NBR1      | -0.00436 | 1.30E-03 | 8.54E-03 |
| 201391_at   | TRAP1     | -0.01074 | 3.13E-09 | 1.09E-07 |
| 201393_s_at | IGF2R     | -0.00618 | 3.36E-03 | 1.87E-02 |
| 201395_at   | RBM5      | 0.007978 | 2.64E-04 | 2.26E-03 |
| 201397_at   | PHGDH     | -0.00861 | 4.21E-04 | 3.37E-03 |
| 201398_s_at | TRAM1     | 0.005571 | 3.17E-03 | 1.79E-02 |
| 201399_s_at | TRAM1     | 0.006359 | 7.37E-04 | 5.42E-03 |
| 201406_at   | RPL36A    | 0.007074 | 1.43E-04 | 1.34E-03 |
| 201407_s_at | PPP1CB    | 0.006245 | 2.08E-03 | 1.27E-02 |
| 201410_at   | PLEKHB2   | -0.00921 | 1.41E-06 | 2.35E-05 |
| 201415_at   | GSS       | -0.01061 | 4.39E-08 | 1.09E-06 |
| 201416_at   | SOX4      | 0.018517 | 4.26E-07 | 8.23E-06 |
| 201417_at   | SOX4      | 0.011381 | 3.57E-03 | 1.97E-02 |
| 201418_s_at | SOX4      | 0.007947 | 2.59E-03 | 1.51E-02 |

|             |         |          |          |          |
|-------------|---------|----------|----------|----------|
| 201425_at   | ALDH2   | -0.01189 | 3.33E-09 | 1.14E-07 |
| 201426_s_at | VIM     | 0.017359 | 2.05E-09 | 7.67E-08 |
| 201428_at   | CLDN4   | 0.015926 | 6.42E-07 | 1.18E-05 |
| 201432_at   | CAT     | -0.0127  | 4.47E-09 | 1.47E-07 |
| 201438_at   | COL6A3  | 0.018006 | 3.06E-06 | 4.66E-05 |
| 201459_at   | RUVBL2  | -0.0048  | 1.07E-02 | 4.72E-02 |
| 201464_x_at | JUN     | 0.006566 | 1.07E-02 | 4.73E-02 |
| 201466_s_at | JUN     | 0.011144 | 1.33E-03 | 8.74E-03 |
| 201470_at   | GSTO1   | -0.00434 | 9.03E-03 | 4.12E-02 |
| 201489_at   | PPIF    | -0.00951 | 9.61E-08 | 2.19E-06 |
| 201494_at   | PRCP    | -0.00629 | 1.31E-05 | 1.67E-04 |
| 201497_x_at | MYH11   | 0.009591 | 4.85E-03 | 2.53E-02 |
| 201501_s_at | GRSF1   | -0.00707 | 1.74E-03 | 1.09E-02 |
| 201506_at   | TGFBI   | 0.019936 | 7.58E-07 | 1.37E-05 |
| 201507_at   | PFDN1   | -0.00532 | 1.08E-03 | 7.39E-03 |
| 201508_at   | IGFBP4  | -0.01081 | 1.54E-03 | 9.86E-03 |
| 201509_at   | IDH3B   | -0.00745 | 2.24E-03 | 1.34E-02 |
| 201510_at   | ELF3    | 0.010131 | 2.89E-03 | 1.65E-02 |
| 201512_s_at | TOMM70A | -0.00716 | 2.06E-06 | 3.31E-05 |
| 201519_at   | TOMM70A | -0.00537 | 5.29E-04 | 4.12E-03 |
| 201524_x_at | UBE2N   | 0.00568  | 5.92E-04 | 4.52E-03 |
| 201535_at   | UBL3    | -0.00657 | 3.45E-03 | 1.92E-02 |
| 201536_at   | DUSP3   | -0.00692 | 2.14E-03 | 1.29E-02 |
| 201539_s_at | FHL1    | 0.017349 | 4.55E-06 | 6.64E-05 |
| 201540_at   | FHL1    | 0.01533  | 3.29E-07 | 6.57E-06 |
| 201546_at   | TRIP12  | -0.00441 | 5.34E-03 | 2.72E-02 |
| 201550_x_at | ACTG1   | 0.005533 | 2.92E-04 | 2.46E-03 |
| 201553_s_at | LAMP1   | -0.00681 | 7.83E-05 | 8.02E-04 |
| 201556_s_at | VAMP2   | -0.00711 | 3.86E-06 | 5.73E-05 |
| 201559_s_at | CLIC4   | -0.00734 | 1.87E-03 | 1.16E-02 |
| 201560_at   | CLIC4   | -0.00804 | 1.04E-04 | 1.02E-03 |
| 201562_s_at | SORD    | -0.02425 | 2.29E-14 | 4.99E-12 |
| 201563_at   | SORD    | -0.02065 | 9.11E-15 | 2.63E-12 |
| 201565_s_at | ID2     | -0.00872 | 2.60E-03 | 1.52E-02 |
| 201567_s_at | GOLGA4  | -0.00736 | 3.04E-06 | 4.64E-05 |
| 201568_at   | UQCRCQ  | -0.00747 | 3.05E-03 | 1.73E-02 |
| 201569_s_at | SAMM50  | -0.01053 | 6.23E-07 | 1.15E-05 |
| 201570_at   | SAMM50  | -0.01229 | 1.01E-05 | 1.33E-04 |
| 201578_at   | PODXL   | -0.00759 | 1.03E-02 | 4.59E-02 |
| 201590_x_at | ANXA2   | 0.018029 | 9.86E-10 | 4.04E-08 |
| 201599_at   | OAT     | -0.0113  | 1.44E-07 | 3.14E-06 |
| 201601_x_at | IFITM1  | 0.021393 | 3.54E-08 | 9.00E-07 |
| 201605_x_at | CNN2    | 0.005966 | 4.86E-04 | 3.82E-03 |
| 201607_at   | PWP1    | -0.0053  | 7.71E-03 | 3.64E-02 |
| 201610_at   | ICMT    | 0.006124 | 8.31E-03 | 3.86E-02 |
| 201612_at   | ALDH9A1 | -0.00939 | 3.91E-07 | 7.59E-06 |
| 201613_s_at | AP1G2   | 0.00811  | 7.30E-04 | 5.37E-03 |
| 201617_x_at | CALD1   | 0.004621 | 8.81E-03 | 4.04E-02 |
| 201619_at   | PRDX3   | -0.00809 | 6.27E-08 | 1.48E-06 |

|             |          |          |          |          |
|-------------|----------|----------|----------|----------|
| 201621_at   | NBL1     | 0.010185 | 1.13E-04 | 1.10E-03 |
| 201625_s_at | INSIG1   | -0.00756 | 4.90E-03 | 2.55E-02 |
| 201630_s_at | ACP1     | -0.00492 | 9.17E-04 | 6.49E-03 |
| 201640_x_at | CLPTM1   | -0.00641 | 1.28E-05 | 1.63E-04 |
| 201641_at   | BST2     | 0.014251 | 1.21E-05 | 1.55E-04 |
| 201644_at   | TSTA3    | 0.004602 | 4.49E-03 | 2.37E-02 |
| 201645_at   | TNC      | 0.020536 | 3.76E-08 | 9.49E-07 |
| 201649_at   | UBE2L6   | 0.008023 | 7.90E-05 | 8.07E-04 |
| 201650_at   | KRT19    | 0.015218 | 6.24E-05 | 6.61E-04 |
| 201651_s_at | PACSIN2  | -0.00632 | 2.48E-05 | 2.94E-04 |
| 201652_at   | COPS5    | -0.00599 | 2.42E-04 | 2.11E-03 |
| 201656_at   | ITGA6    | -0.00852 | 2.29E-06 | 3.62E-05 |
| 201658_at   | ARL1     | -0.00404 | 7.47E-03 | 3.56E-02 |
| 201666_at   | TIMP1    | 0.028596 | 2.05E-11 | 1.59E-09 |
| 201667_at   | GJA1     | 0.019588 | 5.47E-09 | 1.77E-07 |
| 201668_x_at | MARCKS   | 0.013099 | 1.73E-10 | 9.61E-09 |
| 201669_s_at | MARCKS   | 0.015614 | 8.16E-07 | 1.46E-05 |
| 201670_s_at | MARCKS   | 0.016281 | 3.88E-10 | 1.85E-08 |
| 201675_at   | AKAP1    | -0.00869 | 1.80E-05 | 2.21E-04 |
| 201682_at   | PMPCB    | -0.00797 | 2.06E-07 | 4.32E-06 |
| 201688_s_at | TPD52    | -0.00584 | 6.32E-03 | 3.11E-02 |
| 201689_s_at | TPD52    | -0.00745 | 5.44E-03 | 2.76E-02 |
| 201690_s_at | TPD52    | -0.00693 | 1.51E-03 | 9.69E-03 |
| 201695_s_at | PNP      | -0.019   | 8.59E-09 | 2.62E-07 |
| 201701_s_at | PGRMC2   | -0.01011 | 5.97E-06 | 8.43E-05 |
| 201707_at   | PEX19    | -0.00953 | 3.91E-04 | 3.16E-03 |
| 201708_s_at | NIPSNAP1 | -0.0138  | 5.39E-04 | 4.18E-03 |
| 201709_s_at | NIPSNAP1 | -0.00852 | 2.54E-05 | 3.00E-04 |
| 201712_s_at | RANBP2   | -0.00629 | 2.42E-03 | 1.43E-02 |
| 201714_at   | TUBG1    | -0.01667 | 1.98E-09 | 7.45E-08 |
| 201718_s_at | EPB41L2  | 0.012663 | 1.49E-06 | 2.47E-05 |
| 201719_s_at | EPB41L2  | 0.013438 | 4.05E-08 | 1.02E-06 |
| 201720_s_at | LAPTM5   | 0.022083 | 1.59E-09 | 6.07E-08 |
| 201721_s_at | LAPTM5   | 0.024788 | 2.16E-09 | 7.99E-08 |
| 201723_s_at | GALNT1   | 0.005589 | 3.31E-03 | 1.85E-02 |
| 201728_s_at | KIAA0100 | -0.01135 | 2.01E-04 | 1.79E-03 |
| 201729_s_at | KIAA0100 | -0.00943 | 1.56E-03 | 9.98E-03 |
| 201737_s_at | MARCH6   | -0.00858 | 3.43E-04 | 2.82E-03 |
| 201738_at   | EIF1B    | -0.00639 | 7.94E-04 | 5.75E-03 |
| 201739_at   | SGK1     | -0.01139 | 1.32E-08 | 3.81E-07 |
| 201740_at   | NDUFS3   | -0.00755 | 1.54E-04 | 1.44E-03 |
| 201743_at   | CD14     | 0.012133 | 2.09E-06 | 3.34E-05 |
| 201744_s_at | LUM      | 0.026673 | 2.00E-06 | 3.21E-05 |
| 201746_at   | TP53     | 0.008107 | 6.08E-04 | 4.60E-03 |
| 201752_s_at | ADD3     | -0.01007 | 2.29E-08 | 6.13E-07 |
| 201753_s_at | ADD3     | -0.01208 | 3.20E-03 | 1.80E-02 |
| 201756_at   | RPA2     | 0.00712  | 4.99E-04 | 3.91E-03 |
| 201760_s_at | WSB2     | -0.00534 | 1.64E-03 | 1.04E-02 |
| 201761_at   | MTHFD2   | 0.0141   | 7.49E-05 | 7.72E-04 |



|             |          |          |          |          |
|-------------|----------|----------|----------|----------|
| 201762_s_at | PSME2    | 0.005945 | 7.53E-03 | 3.58E-02 |
| 201763_s_at | DAXX     | 0.008181 | 7.82E-03 | 3.68E-02 |
| 201781_s_at | AIP      | 0.007746 | 1.09E-02 | 4.81E-02 |
| 201785_at   | RNASE1   | 0.019799 | 1.93E-06 | 3.11E-05 |
| 201787_at   | FBLN1    | 0.009325 | 4.29E-06 | 6.30E-05 |
| 201791_s_at | DHCR7    | -0.00549 | 3.51E-03 | 1.94E-02 |
| 201792_at   | AEBP1    | 0.015047 | 6.00E-06 | 8.47E-05 |
| 201798_s_at | MYOF     | 0.016516 | 2.34E-07 | 4.83E-06 |
| 201799_s_at | OSBP     | -0.0069  | 4.00E-04 | 3.22E-03 |
| 201800_s_at | OSBP     | -0.00805 | 6.10E-03 | 3.02E-02 |
| 201801_s_at | SLC29A1  | 0.006195 | 5.61E-03 | 2.83E-02 |
| 201802_at   | SLC29A1  | 0.007318 | 1.08E-04 | 1.06E-03 |
| 201810_s_at | SH3BP5   | -0.00811 | 6.68E-05 | 6.99E-04 |
| 201818_at   | LPCAT1   | 0.007425 | 1.99E-04 | 1.78E-03 |
| 201823_s_at | RNF14    | -0.00589 | 7.77E-04 | 5.64E-03 |
| 201826_s_at | SCCPDH   | -0.00525 | 4.48E-04 | 3.56E-03 |
| 201829_at   | NET1     | -0.0091  | 4.35E-06 | 6.36E-05 |
| 201830_s_at | NET1     | -0.00837 | 3.19E-04 | 2.65E-03 |
| 201838_s_at | SUPT7L   | -0.00827 | 1.11E-03 | 7.56E-03 |
| 201842_s_at | EFEMP1   | 0.012141 | 3.80E-07 | 7.40E-06 |
| 201848_s_at | BNIP3    | -0.01223 | 4.20E-09 | 1.39E-07 |
| 201849_at   | BNIP3    | -0.01217 | 3.10E-08 | 8.02E-07 |
| 201850_at   | CAPG     | 0.011179 | 8.49E-03 | 3.92E-02 |
| 201851_at   | SH3GL1   | -0.00524 | 8.16E-04 | 5.89E-03 |
| 201852_x_at | COL3A1   | 0.020471 | 3.66E-06 | 5.46E-05 |
| 201858_s_at | SRGN     | 0.021573 | 1.13E-07 | 2.54E-06 |
| 201859_at   | SRGN     | 0.016743 | 7.94E-06 | 1.08E-04 |
| 201866_s_at | NR3C1    | 0.006018 | 4.21E-03 | 2.25E-02 |
| 201874_at   | MPZL1    | 0.009388 | 7.79E-03 | 3.67E-02 |
| 201875_s_at | MPZL1    | 0.009772 | 1.57E-03 | 1.00E-02 |
| 201876_at   | PON2     | 0.006954 | 2.30E-03 | 1.37E-02 |
| 201886_at   | DCAF11   | -0.00828 | 2.72E-03 | 1.58E-02 |
| 201891_s_at | B2M      | 0.008625 | 6.49E-10 | 2.84E-08 |
| 201893_x_at | DCN      | 0.01685  | 1.52E-06 | 2.51E-05 |
| 201899_s_at | UBE2A    | 0.004812 | 1.12E-02 | 4.89E-02 |
| 201900_s_at | AKR1A1   | -0.01558 | 2.23E-07 | 4.65E-06 |
| 201903_at   | UQCRC1   | -0.01219 | 8.50E-06 | 1.15E-04 |
| 201917_s_at | SLC25A36 | -0.00651 | 5.10E-05 | 5.54E-04 |
| 201918_at   | SLC25A36 | -0.00783 | 2.08E-04 | 1.85E-03 |
| 201919_at   | SLC25A36 | -0.00917 | 2.05E-06 | 3.29E-05 |
| 201924_at   | AFF1     | -0.0049  | 3.80E-03 | 2.07E-02 |
| 201925_s_at | CD55     | 0.012402 | 4.33E-07 | 8.36E-06 |
| 201926_s_at | CD55     | 0.014262 | 1.20E-08 | 3.49E-07 |
| 201931_at   | ETFA     | -0.014   | 8.70E-13 | 1.13E-10 |
| 201938_at   | CDK2AP1  | 0.005936 | 9.26E-04 | 6.54E-03 |
| 201939_at   | PLK2     | 0.014908 | 1.18E-09 | 4.69E-08 |
| 201949_x_at | CAPZB    | 0.005254 | 6.87E-04 | 5.11E-03 |
| 201951_at   | ALCAM    | -0.00751 | 2.95E-03 | 1.68E-02 |
| 201952_at   | ALCAM    | -0.00513 | 1.11E-02 | 4.88E-02 |

|             |          |          |          |          |
|-------------|----------|----------|----------|----------|
| 201954_at   | ARPC1B   | 0.009251 | 1.86E-05 | 2.28E-04 |
| 201955_at   | CCNC     | -0.00531 | 7.21E-04 | 5.31E-03 |
| 201963_at   | ACSL1    | -0.02034 | 1.32E-18 | 2.72E-15 |
| 201966_at   | NDUFS2   | -0.01071 | 2.51E-03 | 1.47E-02 |
| 201968_s_at | PGM1     | -0.01148 | 3.38E-09 | 1.16E-07 |
| 201971_s_at | ATP6V1A  | -0.00917 | 5.10E-03 | 2.63E-02 |
| 201972_at   | ATP6V1A  | -0.00468 | 3.42E-03 | 1.90E-02 |
| 201976_s_at | MYO10    | 0.006262 | 1.06E-02 | 4.71E-02 |
| 201977_s_at | KIAA0141 | -0.00694 | 1.17E-03 | 7.87E-03 |
| 201980_s_at | RSU1     | 0.004809 | 7.52E-03 | 3.57E-02 |
| 201981_at   | PAPPA    | -0.0096  | 3.11E-03 | 1.76E-02 |
| 201984_s_at | EGFR     | -0.00542 | 1.10E-02 | 4.83E-02 |
| 201995_at   | EXT1     | 0.004819 | 8.93E-03 | 4.08E-02 |
| 202000_at   | NDUFA6   | -0.00476 | 5.59E-03 | 2.82E-02 |
| 202001_s_at | NDUFA6   | -0.00396 | 1.08E-02 | 4.76E-02 |
| 202002_at   | ACAA2    | -0.00927 | 1.07E-06 | 1.87E-05 |
| 202003_s_at | ACAA2    | -0.01511 | 4.07E-14 | 7.89E-12 |
| 202004_x_at | SDHC     | -0.00727 | 3.75E-03 | 2.05E-02 |
| 202012_s_at | EXT2     | 0.005515 | 8.69E-03 | 3.99E-02 |
| 202014_at   | PPP1R15A | 0.008242 | 9.17E-03 | 4.17E-02 |
| 202015_x_at |          | 0.007728 | 1.13E-02 | 4.93E-02 |
| 202016_at   | MEST     | 0.010069 | 5.29E-05 | 5.72E-04 |
| 202017_at   | EPHX1    | -0.01273 | 5.02E-05 | 5.48E-04 |
| 202018_s_at | LTF      | 0.034781 | 8.59E-07 | 1.53E-05 |
| 202025_x_at | ACAA1    | -0.01976 | 3.45E-13 | 5.03E-11 |
| 202026_at   | SDHD     | -0.01156 | 5.43E-08 | 1.31E-06 |
| 202028_s_at | RPL38    | 0.004867 | 3.14E-04 | 2.62E-03 |
| 202029_x_at | RPL38    | 0.004721 | 8.37E-04 | 6.01E-03 |
| 202031_s_at | WIPI2    | -0.00611 | 1.18E-03 | 7.95E-03 |
| 202035_s_at | SFRP1    | 0.008896 | 2.84E-04 | 2.41E-03 |
| 202036_s_at | SFRP1    | 0.010265 | 1.91E-03 | 1.18E-02 |
| 202037_s_at | SFRP1    | 0.011394 | 6.98E-04 | 5.18E-03 |
| 202043_s_at | SMS      | -0.00546 | 6.10E-03 | 3.02E-02 |
| 202044_at   | GRLF1    | -0.00486 | 2.66E-03 | 1.55E-02 |
| 202045_s_at | GRLF1    | -0.00562 | 7.78E-03 | 3.67E-02 |
| 202053_s_at | ALDH3A2  | -0.01575 | 6.99E-11 | 4.47E-09 |
| 202054_s_at | ALDH3A2  | -0.01309 | 5.72E-07 | 1.07E-05 |
| 202070_s_at | IDH3A    | -0.00574 | 2.49E-03 | 1.47E-02 |
| 202073_at   | OPTN     | -0.01166 | 2.86E-04 | 2.42E-03 |
| 202074_s_at | OPTN     | -0.00607 | 6.47E-05 | 6.81E-04 |
| 202077_at   | NDUFAB1  | -0.00898 | 1.58E-06 | 2.60E-05 |
| 202080_s_at | TRAK1    | -0.00658 | 2.82E-04 | 2.39E-03 |
| 202086_at   | MX1      | 0.009682 | 4.72E-04 | 0.003727 |
| 202087_s_at | CTSL1    | -0.00956 | 6.00E-08 | 1.43E-06 |
| 202088_at   | SLC39A6  | 0.006886 | 8.03E-04 | 0.005806 |
| 202096_s_at | TSPO     | 0.006418 | 4.30E-03 | 0.022932 |
| 202098_s_at | PRMT2    | 0.007659 | 2.29E-04 | 0.00201  |
| 202104_s_at | SPG7     | -0.01261 | 9.99E-06 | 0.000132 |
| 202108_at   | PEPD     | -0.02902 | 1.35E-18 | 2.72E-15 |

|             |          |          |          |          |
|-------------|----------|----------|----------|----------|
| 202111_at   | SLC4A2   | -0.00477 | 3.36E-03 | 0.018758 |
| 202112_at   | VWF      | 0.012244 | 1.95E-03 | 0.011999 |
| 202116_at   | DPF2     | 0.005191 | 1.04E-02 | 0.046196 |
| 202117_at   | ARHGAP1  | 0.005307 | 2.12E-03 | 0.012803 |
| 202119_s_at | CPNE3    | -0.00666 | 1.00E-03 | 0.006959 |
| 202122_s_at | PLIN3    | 0.005587 | 2.64E-03 | 0.015397 |
| 202130_at   | RIOK3    | -0.00951 | 3.27E-05 | 0.000376 |
| 202139_at   | AKR7A2   | -0.0134  | 1.86E-04 | 0.00168  |
| 202142_at   | COPS8    | -0.00529 | 1.20E-03 | 0.008032 |
| 202156_s_at | CELF2    | 0.008885 | 1.08E-05 | 0.000141 |
| 202157_s_at | CELF2    | 0.012635 | 4.49E-04 | 0.003572 |
| 202158_s_at | CELF2    | 0.014212 | 2.21E-06 | 3.52E-05 |
| 202162_s_at | CNOT8    | 0.008064 | 1.23E-03 | 0.008191 |
| 202169_s_at | AASDHPPT | -0.00599 | 3.59E-03 | 0.019794 |
| 202173_s_at | VEZF1    | 0.00573  | 1.08E-04 | 0.001062 |
| 202178_at   | PRKCZ    | -0.01312 | 1.73E-07 | 3.69E-06 |
| 202181_at   | KIAA0247 | -0.00622 | 6.73E-03 | 0.03263  |
| 202191_s_at | GAS7     | 0.01324  | 1.90E-06 | 3.06E-05 |
| 202192_s_at | GAS7     | 0.01081  | 5.60E-06 | 7.98E-05 |
| 202196_s_at | DKK3     | 0.014266 | 3.11E-08 | 8.02E-07 |
| 202200_s_at | SRPK1    | -0.00869 | 1.46E-03 | 0.009421 |
| 202202_s_at | LAMA4    | 0.009731 | 6.14E-04 | 0.004644 |
| 202204_s_at | AMFR     | -0.00693 | 4.81E-04 | 0.003785 |
| 202206_at   | ARL4C    | 0.018121 | 7.24E-06 | 0.0001   |
| 202207_at   | ARL4C    | 0.023375 | 9.58E-08 | 2.18E-06 |
| 202208_s_at | ARL4C    | 0.007615 | 1.22E-04 | 0.001167 |
| 202209_at   | LSM3     | -0.00564 | 1.43E-04 | 0.001343 |
| 202210_x_at | GSK3A    | -0.00625 | 1.76E-04 | 0.001604 |
| 202217_at   | C21orf33 | -0.01668 | 9.43E-10 | 3.93E-08 |
| 202219_at   | SLC6A8   | -0.01235 | 9.61E-04 | 0.006727 |
| 202234_s_at | SLC16A1  | -0.01378 | 1.84E-04 | 0.00167  |
| 202235_at   | SLC16A1  | -0.01431 | 8.77E-06 | 0.000118 |
| 202236_s_at | SLC16A1  | -0.01491 | 8.74E-05 | 0.000883 |
| 202237_at   | NNMT     | 0.038938 | 2.34E-13 | 3.5E-11  |
| 202238_s_at | NNMT     | 0.033157 | 1.04E-14 | 2.86E-12 |
| 202242_at   | TSPAN7   | -0.01381 | 2.08E-08 | 5.66E-07 |
| 202245_at   | LSS      | -0.00641 | 3.85E-03 | 0.020899 |
| 202250_s_at | DCAF8    | -0.0091  | 2.61E-04 | 0.002249 |
| 202255_s_at | SIPA1L1  | -0.00877 | 2.88E-04 | 0.002437 |
| 202266_at   | TDP2     | -0.0137  | 3.29E-09 | 1.14E-07 |
| 202267_at   | LAMC2    | 0.010505 | 3.18E-06 | 4.82E-05 |
| 202269_x_at | GBP1     | 0.009158 | 1.13E-03 | 0.007659 |
| 202271_at   | FBXO28   | -0.0101  | 1.48E-05 | 0.000186 |
| 202272_s_at | FBXO28   | -0.01056 | 2.98E-05 | 0.000347 |
| 202279_at   | C14orf2  | -0.00786 | 1.18E-05 | 0.000153 |
| 202280_at   |          | -0.00808 | 1.62E-04 | 0.001494 |
| 202283_at   | SERPINF1 | 0.016822 | 2.38E-04 | 0.002079 |
| 202286_s_at | TACSTD2  | 0.018276 | 1.10E-06 | 1.92E-05 |
| 202289_s_at | TACC2    | -0.00774 | 2.13E-03 | 0.012888 |

|             |          |          |          |          |
|-------------|----------|----------|----------|----------|
| 202291_s_at | MGP      | 0.020173 | 3.42E-06 | 5.15E-05 |
| 202295_s_at | CTSH     | -0.01454 | 1.47E-09 | 5.67E-08 |
| 202298_at   | NDUFA1   | -0.00532 | 2.51E-03 | 0.014747 |
| 202299_s_at | HBXIP    | -0.00957 | 4.73E-06 | 6.83E-05 |
| 202300_at   | HBXIP    | -0.00955 | 3.68E-04 | 0.002998 |
| 202303_x_at | SMARCA5  | 0.005247 | 6.92E-04 | 0.005139 |
| 202306_at   | POLR2G   | 0.006288 | 1.53E-03 | 0.009786 |
| 202307_s_at | TAP1     | 0.01317  | 7.50E-09 | 2.34E-07 |
| 202309_at   | MTHFD1   | -0.01439 | 1.36E-13 | 2.2E-11  |
| 202310_s_at | COL1A1   | 0.021328 | 3.90E-07 | 7.59E-06 |
| 202311_s_at | COL1A1   | 0.010153 | 1.95E-05 | 0.000237 |
| 202313_at   | PPP2R2A  | -0.00608 | 2.10E-05 | 0.000254 |
| 202315_s_at | BCR      | -0.00726 | 1.02E-02 | 0.045399 |
| 202317_s_at | UBE4B    | -0.00529 | 6.53E-03 | 0.031858 |
| 202325_s_at | ATP5J    | -0.00491 | 1.75E-04 | 0.001601 |
| 202328_s_at | PKD1     | 0.004509 | 6.41E-03 | 0.03144  |
| 202330_s_at | UNG      | -0.00519 | 2.27E-03 | 0.013587 |
| 202331_at   | BCKDHA   | -0.00592 | 8.23E-04 | 0.00593  |
| 202343_x_at | COX5B    | -0.00634 | 1.83E-03 | 0.011363 |
| 202345_s_at | FABP5    | 0.01434  | 1.38E-06 | 2.31E-05 |
| 202350_s_at | MATN2    | 0.012536 | 3.79E-05 | 0.000429 |
| 202353_s_at | PSMD12   | -0.01062 | 1.60E-06 | 2.63E-05 |
| 202364_at   | MXI1     | -0.00486 | 5.72E-03 | 0.028654 |
| 202365_at   | UNC119B  | -0.00693 | 1.21E-03 | 0.008084 |
| 202366_at   | ACADS    | -0.00448 | 8.98E-04 | 0.006387 |
| 202367_at   | CUX1     | -0.00853 | 5.75E-04 | 0.004405 |
| 202376_at   | SERPINA3 | 0.014388 | 3.45E-03 | 0.019149 |
| 202379_s_at | NKTR     | 0.005919 | 1.05E-02 | 0.046399 |
| 202382_s_at | GNPDA1   | -0.01284 | 6.25E-07 | 1.15E-05 |
| 202388_at   | RGS2     | 0.009404 | 4.40E-03 | 0.023331 |
| 202391_at   | BASP1    | 0.021649 | 2.38E-06 | 3.75E-05 |
| 202403_s_at | COL1A2   | 0.021747 | 2.73E-07 | 5.56E-06 |
| 202404_s_at | COL1A2   | 0.024441 | 2.14E-06 | 3.41E-05 |
| 202411_at   | IFI27    | 0.012654 | 1.21E-04 | 0.001159 |
| 202412_s_at | USP1     | 0.006826 | 1.87E-03 | 0.0116   |
| 202416_at   | DNAJC7   | -0.00505 | 8.63E-03 | 0.039663 |
| 202422_s_at | ACSL4    | 0.012334 | 1.13E-04 | 0.001096 |
| 202423_at   | MYST3    | 0.005576 | 4.02E-03 | 0.021671 |
| 202427_s_at | BRP44    | -0.00639 | 5.57E-07 | 1.05E-05 |
| 202430_s_at | PLSCR1   | 0.012549 | 3.47E-05 | 0.000396 |
| 202431_s_at | MYC      | 0.012193 | 4.56E-03 | 0.024017 |
| 202433_at   | SLC35B1  | -0.00533 | 1.80E-03 | 0.011237 |
| 202435_s_at | CYP1B1   | 0.018621 | 4.78E-08 | 1.18E-06 |
| 202436_s_at | CYP1B1   | 0.02754  | 3.92E-13 | 5.56E-11 |
| 202437_s_at | CYP1B1   | 0.022089 | 1.01E-10 | 6.11E-09 |
| 202440_s_at | ST5      | 0.010684 | 4.11E-05 | 0.000459 |
| 202441_at   | ERLIN1   | -0.00782 | 1.85E-05 | 0.000226 |
| 202443_x_at | NOTCH2   | 0.007733 | 1.26E-05 | 0.000161 |
| 202446_s_at | PLSCR1   | 0.015896 | 2.05E-11 | 1.59E-09 |

|             |          |          |          |          |
|-------------|----------|----------|----------|----------|
| 202447_at   | DECR1    | -0.01121 | 9.00E-13 | 1.16E-10 |
| 202449_s_at | RXRA     | -0.0117  | 1.57E-09 | 6.04E-08 |
| 202450_s_at | CTSK     | 0.014808 | 1.97E-05 | 0.00024  |
| 202454_s_at | ERBB3    | -0.00789 | 9.66E-04 | 0.006753 |
| 202456_s_at | ZER1     | -0.00825 | 9.30E-04 | 0.006564 |
| 202465_at   | PCOLCE   | 0.00935  | 9.65E-04 | 0.006752 |
| 202471_s_at | IDH3G    | -0.0095  | 1.50E-03 | 0.009675 |
| 202472_at   | MPI      | -0.0064  | 2.74E-03 | 0.01585  |
| 202475_at   | TMEM147  | -0.00722 | 6.62E-05 | 0.000693 |
| 202484_s_at | MBD2     | 0.005076 | 9.79E-05 | 0.000973 |
| 202486_at   | AFG3L2   | -0.00684 | 2.62E-04 | 0.002254 |
| 202488_s_at | FXYD3    | 0.008402 | 1.98E-04 | 0.001776 |
| 202489_s_at | FXYD3    | 0.014794 | 4.96E-07 | 9.42E-06 |
| 202497_x_at | SLC2A3   | 0.012702 | 6.75E-05 | 0.000704 |
| 202498_s_at | SLC2A3   | 0.010042 | 3.42E-03 | 0.019018 |
| 202499_s_at | SLC2A3   | 0.015378 | 2.87E-04 | 0.002426 |
| 202502_at   | ACADM    | -0.01682 | 2.09E-09 | 7.77E-08 |
| 202503_s_at | KIAA0101 | 0.01122  | 5.16E-05 | 0.000559 |
| 202504_at   | TRIM29   | 0.011424 | 4.82E-06 | 6.95E-05 |
| 202505_at   | SNRPB2   | -0.00401 | 3.95E-03 | 0.021369 |
| 202507_s_at | SNAP25   | 0.006128 | 3.42E-03 | 0.019    |
| 202510_s_at | TNFAIP2  | 0.015212 | 3.34E-06 | 5.04E-05 |
| 202525_at   | PRSS8    | -0.0082  | 4.53E-03 | 0.023888 |
| 202532_s_at | DHFR     | -0.01755 | 2.88E-08 | 7.52E-07 |
| 202533_s_at | DHFR     | -0.01164 | 8.94E-06 | 0.00012  |
| 202534_x_at | DHFR     | -0.00888 | 9.27E-05 | 0.000929 |
| 202540_s_at | HMGCR    | -0.0056  | 1.08E-02 | 0.047726 |
| 202553_s_at | SYF2     | 0.003617 | 8.89E-03 | 0.04068  |
| 202559_x_at | C1orf77  | 0.005155 | 3.07E-03 | 0.017411 |
| 202579_x_at | HMGN4    | 0.004572 | 5.35E-03 | 0.027233 |
| 202590_s_at | PDK2     | -0.02168 | 2.60E-12 | 2.77E-10 |
| 202595_s_at | LEPROTL1 | -0.00473 | 5.67E-03 | 0.028503 |
| 202598_at   | S100A13  | 0.018643 | 1.00E-10 | 6.11E-09 |
| 202603_at   | ADAM10   | 0.005652 | 4.37E-03 | 0.023214 |
| 202609_at   | EPS8     | -0.00639 | 6.16E-04 | 0.004655 |
| 202614_at   | SLC30A9  | -0.00754 | 5.73E-10 | 2.54E-08 |
| 202622_s_at | ATXN2    | -0.00591 | 1.46E-05 | 0.000183 |
| 202625_at   | LYN      | 0.014859 | 5.84E-06 | 8.28E-05 |
| 202626_s_at | LYN      | 0.012556 | 1.61E-07 | 3.47E-06 |
| 202630_at   | APPBP2   | -0.00601 | 2.51E-03 | 0.014725 |
| 202632_at   | DPH1     | -0.00583 | 3.54E-03 | 0.019536 |
| 202637_s_at | ICAM1    | 0.012281 | 5.01E-05 | 0.000547 |
| 202638_s_at | ICAM1    | 0.007921 | 6.06E-03 | 0.030028 |
| 202643_s_at | TNFAIP3  | 0.006243 | 4.26E-03 | 0.022732 |
| 202644_s_at | TNFAIP3  | 0.012694 | 2.72E-06 | 4.21E-05 |
| 202645_s_at | MEN1     | -0.00651 | 6.00E-03 | 0.029801 |
| 202648_at   |          | 0.015676 | 2.29E-04 | 0.002012 |
| 202649_x_at | RPS19    | 0.016546 | 2.93E-05 | 0.000342 |
| 202652_at   | APBB1    | -0.0044  | 1.82E-03 | 0.011347 |

|             |          |          |          |          |
|-------------|----------|----------|----------|----------|
| 202659_at   | PSMB10   | 0.009822 | 2.13E-06 | 3.4E-05  |
| 202661_at   | ITPR2    | -0.01244 | 1.29E-06 | 2.17E-05 |
| 202662_s_at | ITPR2    | -0.00773 | 2.47E-04 | 0.002142 |
| 202663_at   | WIPF1    | 0.006821 | 3.72E-04 | 0.003027 |
| 202664_at   | WIPF1    | 0.008059 | 9.71E-03 | 0.043669 |
| 202665_s_at | WIPF1    | 0.007867 | 4.74E-06 | 6.84E-05 |
| 202675_at   | SDHB     | -0.01177 | 1.36E-05 | 0.000172 |
| 202685_s_at | AXL      | 0.010578 | 3.39E-07 | 6.72E-06 |
| 202686_s_at | AXL      | 0.012892 | 2.34E-06 | 3.69E-05 |
| 202687_s_at | TNFSF10  | 0.006482 | 4.68E-03 | 0.024536 |
| 202690_s_at | SNRPD1   | 0.005633 | 1.72E-03 | 0.010828 |
| 202693_s_at | STK17A   | 0.011285 | 2.16E-05 | 0.000259 |
| 202704_at   | TOB1     | -0.00847 | 6.66E-03 | 0.032377 |
| 202707_at   | UMPS     | -0.0065  | 4.06E-03 | 0.021868 |
| 202709_at   | FMOD     | 0.007817 | 0.000748 | 0.005469 |
| 202713_s_at | KIAA0391 | -0.00732 | 0.001    | 0.006938 |
| 202714_s_at | KIAA0391 | -0.00551 | 0.007731 | 0.036494 |
| 202719_s_at | TES      | 0.011391 | 2.53E-05 | 0.000299 |
| 202720_at   | TES      | 0.011829 | 1.95E-05 | 0.000237 |
| 202726_at   | LIG1     | 0.003827 | 0.009049 | 0.041256 |
| 202727_s_at | IFNGR1   | 0.010016 | 9.6E-05  | 0.000957 |
| 202728_s_at | LTBP1    | 0.010531 | 0.002294 | 0.013701 |
| 202729_s_at | LTBP1    | 0.013007 | 0.000348 | 0.002854 |
| 202730_s_at | PDCD4    | 0.007505 | 0.000232 | 0.002031 |
| 202731_at   | PDCD4    | 0.009172 | 0.000619 | 0.004676 |
| 202733_at   | P4HA2    | -0.01923 | 4.94E-10 | 2.25E-08 |
| 202735_at   | EBP      | -0.00961 | 1.25E-07 | 2.76E-06 |
| 202737_s_at | LSM4     | -0.00541 | 0.001155 | 0.00779  |
| 202738_s_at | PHKB     | -0.00644 | 8.35E-06 | 0.000113 |
| 202739_s_at | PHKB     | -0.00889 | 2.59E-05 | 0.000304 |
| 202740_at   | ABHD14A  | -0.03132 | 6.01E-16 | 3.27E-13 |
| 202746_at   | ITM2A    | 0.01814  | 3.53E-10 | 1.72E-08 |
| 202747_s_at | ITM2A    | 0.017888 | 1.28E-07 | 2.82E-06 |
| 202748_at   | GBP2     | 0.021126 | 1.42E-10 | 8.12E-09 |
| 202749_at   | WRB      | -0.00603 | 0.010878 | 0.047879 |
| 202751_at   | TFIP11   | -0.00558 | 0.000773 | 0.005622 |
| 202752_x_at | SLC7A8   | -0.02967 | 2.93E-09 | 1.04E-07 |
| 202759_s_at | AKAP2    | -0.00767 | 0.000715 | 0.005283 |
| 202763_at   | CASP3    | 0.006585 | 0.000664 | 0.004977 |
| 202765_s_at | FBN1     | 0.010116 | 0.000363 | 0.002966 |
| 202766_s_at | FBN1     | 0.010279 | 0.000622 | 0.004697 |
| 202767_at   | ACP2     | -0.00883 | 4.08E-05 | 0.000457 |
| 202772_at   | HMGCL    | -0.01431 | 7.08E-09 | 2.24E-07 |
| 202780_at   | OXCT1    | -0.01415 | 7.05E-06 | 9.75E-05 |
| 202783_at   | NNT      | -0.01474 | 1.38E-08 | 3.97E-07 |
| 202784_s_at | NNT      | -0.01179 | 2.3E-10  | 1.21E-08 |
| 202790_at   | CLDN7    | 0.009676 | 0.00161  | 0.010231 |
| 202792_s_at | PPP6R2   | -0.01083 | 0.000102 | 0.00101  |
| 202795_x_at | TRIOBP   | 0.005906 | 0.001063 | 0.007288 |

|             |          |          |          |          |
|-------------|----------|----------|----------|----------|
| 202797_at   | SACM1L   | -0.0053  | 0.004465 | 0.023615 |
| 202803_s_at | ITGB2    | 0.017741 | 4.76E-08 | 1.17E-06 |
| 202805_s_at | ABCC1    | 0.00569  | 0.002859 | 0.016387 |
| 202807_s_at | TOM1     | -0.00557 | 0.009552 | 0.043056 |
| 202814_s_at | HEXIM1   | -0.00923 | 0.000155 | 0.001445 |
| 202820_at   | AHR      | 0.015811 | 1.24E-07 | 2.75E-06 |
| 202825_at   | SLC25A4  | -0.01151 | 9.35E-10 | 3.9E-08  |
| 202830_s_at | SLC37A4  | -0.01768 | 3.66E-10 | 1.77E-08 |
| 202833_s_at | SERPINA1 | -0.01657 | 8.25E-07 | 1.48E-05 |
| 202834_at   | AGT      | -0.02351 | 2.46E-11 | 1.86E-09 |
| 202836_s_at | TXNL4A   | -0.00576 | 0.001922 | 0.011866 |
| 202842_s_at | DNAJB9   | -0.00433 | 0.007041 | 0.033949 |
| 202843_at   | DNAJB9   | -0.01019 | 8.67E-05 | 0.000876 |
| 202847_at   | PCK2     | -0.02436 | 4.24E-13 | 5.95E-11 |
| 202850_at   | ABCD3    | -0.00656 | 0.000958 | 0.006713 |
| 202853_s_at | RYK      | 0.005012 | 0.007254 | 0.034762 |
| 202859_x_at | IL8      | 0.015139 | 0.002316 | 0.013793 |
| 202862_at   | FAH      | -0.02233 | 1.06E-08 | 3.13E-07 |
| 202864_s_at | SP100    | 0.010638 | 5.61E-07 | 1.05E-05 |
| 202866_at   | DNAJB12  | -0.00904 | 2.58E-06 | 4.01E-05 |
| 202867_s_at | DNAJB12  | -0.00859 | 0.002034 | 0.012427 |
| 202872_at   | ATP6V1C1 | -0.01244 | 1.12E-06 | 1.93E-05 |
| 202873_at   | ATP6V1C1 | -0.00666 | 0.003372 | 0.018797 |
| 202874_s_at | ATP6V1C1 | -0.0073  | 7.9E-05  | 0.000807 |
| 202883_s_at | PPP2R1B  | -0.00871 | 0.001596 | 0.010167 |
| 202884_s_at | PPP2R1B  | -0.00628 | 0.002099 | 0.012731 |
| 202886_s_at | PPP2R1B  | -0.006   | 0.006604 | 0.032143 |
| 202888_s_at | ANPEP    | -0.02073 | 2.38E-09 | 8.69E-08 |
| 202889_x_at | MAP7     | -0.01629 | 2.5E-09  | 9.07E-08 |
| 202890_at   | MAP7     | -0.01258 | 1.27E-09 | 4.99E-08 |
| 202891_at   | NIT1     | -0.01063 | 3.05E-07 | 6.13E-06 |
| 202892_at   | CDC23    | -0.00849 | 0.010632 | 0.047051 |
| 202893_at   | UNC13B   | -0.00836 | 0.000317 | 0.002642 |
| 202898_at   | SDC3     | 0.014582 | 3.32E-11 | 2.4E-09  |
| 202899_s_at | SRSF3    | 0.008857 | 0.009176 | 0.041743 |
| 202901_x_at | CTSS     | 0.015158 | 5.62E-07 | 1.05E-05 |
| 202902_s_at | CTSS     | 0.025984 | 5.46E-13 | 7.41E-11 |
| 202912_at   | ADM      | -0.01079 | 0.00011  | 0.001077 |
| 202917_s_at | S100A8   | 0.013824 | 0.002892 | 0.016559 |
| 202920_at   | ANK2     | -0.02758 | 4.18E-11 | 2.9E-09  |
| 202921_s_at | ANK2     | -0.02313 | 3.91E-07 | 7.59E-06 |
| 202922_at   | GCLC     | -0.01202 | 1.39E-05 | 0.000176 |
| 202923_s_at | GCLC     | -0.01377 | 4.31E-09 | 1.43E-07 |
| 202924_s_at | PLAGL2   | -0.00682 | 0.003626 | 0.019942 |
| 202925_s_at | PLAGL2   | -0.00593 | 0.001799 | 0.01122  |
| 202929_s_at | DDT      | -0.00672 | 0.00025  | 0.002163 |
| 202930_s_at | SUCLA2   | -0.01075 | 6.8E-07  | 1.24E-05 |
| 202931_x_at | BIN1     | -0.0109  | 9.23E-05 | 0.000926 |
| 202932_at   | YES1     | -0.00847 | 0.000818 | 0.005898 |

|             |         |          |          |          |
|-------------|---------|----------|----------|----------|
| 202935_s_at | SOX9    | 0.015464 | 2.46E-05 | 0.000292 |
| 202936_s_at | SOX9    | 0.016034 | 8.59E-06 | 0.000115 |
| 202941_at   | NDUFV2  | -0.01011 | 1.36E-06 | 2.28E-05 |
| 202942_at   | ETFB    | -0.01295 | 2.08E-05 | 0.000251 |
| 202947_s_at | GYPC    | 0.015398 | 3.3E-07  | 6.57E-06 |
| 202948_at   | IL1R1   | 0.006638 | 0.008958 | 0.040934 |
| 202949_s_at | FHL2    | 0.017654 | 1.05E-07 | 2.37E-06 |
| 202950_at   | CRYZ    | -0.0068  | 7.95E-05 | 0.000811 |
| 202953_at   | C1QB    | 0.019221 | 1.08E-06 | 1.88E-05 |
| 202957_at   | HCLS1   | 0.025585 | 7.3E-12  | 6.78E-10 |
| 202959_at   | MUT     | -0.00976 | 6.1E-06  | 8.58E-05 |
| 202960_s_at | MUT     | -0.01213 | 5.74E-10 | 2.54E-08 |
| 202961_s_at | ATP5J2  | -0.00382 | 0.006023 | 0.029884 |
| 202962_at   | KIF13B  | -0.00925 | 8E-05    | 0.000815 |
| 202965_s_at | CAPN6   | 0.019737 | 4.91E-07 | 9.33E-06 |
| 202966_at   | CAPN6   | 0.014868 | 1.83E-05 | 0.000224 |
| 202967_at   | GSTA4   | -0.00658 | 0.001515 | 0.00972  |
| 202968_s_at | DYRK2   | 0.007214 | 0.000761 | 0.005551 |
| 202972_s_at | FAM13A  | -0.00589 | 0.000866 | 0.006194 |
| 202974_at   | MPP1    | -0.01612 | 3.4E-07  | 6.74E-06 |
| 202975_s_at | RHOBTB3 | -0.00905 | 0.00404  | 0.021769 |
| 202977_s_at | CREBZF  | 0.005521 | 0.007513 | 0.035708 |
| 202981_x_at | SIAH1   | 0.004048 | 0.008519 | 0.03929  |
| 202982_s_at | ACOT1   | -0.02116 | 1.68E-07 | 3.6E-06  |
| 202988_s_at | RGS1    | 0.021429 | 1.33E-05 | 0.000169 |
| 202990_at   | PYGL    | 0.008192 | 0.000169 | 0.001548 |
| 202992_at   | C7      | 0.018221 | 5.4E-06  | 7.72E-05 |
| 202994_s_at | FBLN1   | 0.016608 | 2.33E-05 | 0.000278 |
| 203005_at   | LTBR    | -0.0053  | 0.001247 | 0.008283 |
| 203007_x_at | LYPLA1  | -0.00565 | 0.004996 | 0.025854 |
| 203011_at   | IMPA1   | -0.00792 | 0.001981 | 0.01217  |
| 203012_x_at | RPL23A  | 0.00316  | 0.001605 | 0.010208 |
| 203015_s_at | SSX2IP  | -0.00938 | 0.000536 | 0.004157 |
| 203017_s_at | SSX2IP  | -0.00978 | 0.000133 | 0.001266 |
| 203018_s_at | SSX2IP  | -0.01094 | 6.66E-06 | 9.29E-05 |
| 203021_at   | SLPI    | 0.038273 | 4.18E-11 | 2.9E-09  |
| 203029_s_at | PTPRN2  | 0.0086   | 0.001039 | 0.007164 |
| 203030_s_at | PTPRN2  | 0.015523 | 3.43E-06 | 5.15E-05 |
| 203031_s_at | UROS    | -0.00534 | 0.008468 | 0.039119 |
| 203032_s_at | FH      | -0.01372 | 2.1E-05  | 0.000254 |
| 203033_x_at | FH      | -0.0105  | 4.1E-10  | 1.93E-08 |
| 203034_s_at | RPL27A  | 0.010515 | 0.001108 | 0.007542 |
| 203036_s_at | MTSS1   | -0.0065  | 0.009181 | 0.04175  |
| 203037_s_at | MTSS1   | -0.00676 | 0.001373 | 0.008983 |
| 203039_s_at | NDUFS1  | -0.01316 | 3.62E-08 | 9.19E-07 |
| 203041_s_at | LAMP2   | -0.00951 | 5E-07    | 9.47E-06 |
| 203042_at   | LAMP2   | -0.01341 | 5.83E-08 | 1.39E-06 |
| 203045_at   | NINJ1   | -0.00584 | 0.001389 | 0.009062 |
| 203048_s_at | TTC37   | -0.00749 | 0.000909 | 0.006449 |



|             |          |          |          |          |
|-------------|----------|----------|----------|----------|
| 203060_s_at | PAPSS2   | 0.007252 | 0.000994 | 0.006912 |
| 203064_s_at | FOXK2    | -0.00715 | 0.000232 | 0.002026 |
| 203065_s_at | CAV1     | 0.011187 | 0.000663 | 0.004967 |
| 203066_at   | CHST15   | 0.018499 | 3.43E-07 | 6.79E-06 |
| 203067_at   | PDHX     | -0.00859 | 4.07E-06 | 6.02E-05 |
| 203068_at   | KLHL21   | -0.00891 | 8.33E-06 | 0.000113 |
| 203071_at   | SEMA3B   | -0.00797 | 0.000302 | 0.00253  |
| 203073_at   | COG2     | -0.00906 | 0.002019 | 0.012348 |
| 203076_s_at | SMAD2    | 0.006378 | 0.00055  | 0.004239 |
| 203083_at   | THBS2    | 0.014846 | 0.000687 | 0.005111 |
| 203085_s_at | TGFB1    | 0.004471 | 0.002607 | 0.015227 |
| 203087_s_at | KIF2A    | 0.005109 | 0.011091 | 0.048607 |
| 203091_at   | FUBP1    | 0.003755 | 0.003163 | 0.017826 |
| 203095_at   | MTIF2    | -0.00509 | 0.008029 | 0.037547 |
| 203104_at   | CSF1R    | 0.016617 | 1.87E-05 | 0.000228 |
| 203105_s_at | DNM1L    | -0.00441 | 0.010515 | 0.046623 |
| 203107_x_at | RPS2     | 0.009314 | 0.003556 | 0.019612 |
| 203115_at   | FECH     | -0.01085 | 1.13E-05 | 0.000147 |
| 203116_s_at | FECH     | -0.00953 | 0.005173 | 0.026546 |
| 203123_s_at | SLC11A2  | -0.00868 | 0.001138 | 0.007701 |
| 203124_s_at | SLC11A2  | -0.00824 | 6.59E-05 | 0.000691 |
| 203129_s_at | KIF5C    | 0.01     | 4.24E-06 | 6.23E-05 |
| 203131_at   | PDGFRA   | 0.023038 | 9.03E-07 | 1.6E-05  |
| 203132_at   | RB1      | 0.011458 | 0.000197 | 0.001763 |
| 203134_at   | PICALM   | -0.00458 | 0.000676 | 0.005042 |
| 203139_at   | DAPK1    | 0.008791 | 2.94E-06 | 4.51E-05 |
| 203140_at   | BCL6     | 0.010125 | 0.001043 | 0.007183 |
| 203145_at   | SPAG5    | -0.03104 | 3.61E-18 | 5.74E-15 |
| 203147_s_at | TRIM14   | -0.00994 | 9.25E-05 | 0.000927 |
| 203148_s_at | TRIM14   | -0.00713 | 0.002568 | 0.015029 |
| 203151_at   | MAP1A    | 0.006624 | 0.00259  | 0.015142 |
| 203154_s_at | PAK4     | -0.00714 | 0.000506 | 0.003958 |
| 203156_at   | AKAP11   | -0.0058  | 0.008201 | 0.038173 |
| 203157_s_at | GLS      | -0.01629 | 3.89E-09 | 1.31E-07 |
| 203158_s_at | GLS      | -0.01647 | 5.86E-11 | 3.83E-09 |
| 203159_at   | GLS      | -0.0156  | 2.56E-18 | 4.39E-15 |
| 203164_at   | SLC33A1  | -0.01037 | 1.53E-07 | 3.3E-06  |
| 203165_s_at | SLC33A1  | -0.00809 | 0.007223 | 0.034643 |
| 203166_at   | CFDP1    | -0.00776 | 5.25E-06 | 7.51E-05 |
| 203167_at   | TIMP2    | 0.01307  | 0.0003   | 0.002518 |
| 203173_s_at | C16orf62 | -0.00661 | 0.004644 | 0.024404 |
| 203178_at   | GATM     | -0.01719 | 4.29E-10 | 2.01E-08 |
| 203179_at   | GALT     | -0.00626 | 0.004715 | 0.024685 |
| 203180_at   | ALDH1A3  | 0.010239 | 0.00042  | 0.003369 |
| 203185_at   | RASSF2   | 0.014623 | 7.82E-07 | 1.41E-05 |
| 203186_s_at | S100A4   | 0.020726 | 4.37E-08 | 1.09E-06 |
| 203188_at   | B3GNT1   | -0.01037 | 2.29E-06 | 3.62E-05 |
| 203190_at   | NDUFS8   | -0.00741 | 9.02E-06 | 0.000121 |
| 203192_at   | ABCB6    | -0.00888 | 0.001112 | 0.00756  |

|             |          |          |          |          |
|-------------|----------|----------|----------|----------|
| 203193_at   | ESRRA    | -0.00526 | 0.004618 | 0.02428  |
| 203199_s_at | MTRR     | -0.00945 | 1.09E-05 | 0.000142 |
| 203200_s_at | MTRR     | -0.01144 | 7.66E-05 | 0.000787 |
| 203206_at   | FAM53B   | -0.00624 | 0.001519 | 0.009737 |
| 203207_s_at | MTRF1    | -0.01775 | 2.19E-14 | 4.99E-12 |
| 203208_s_at | MTRF1    | -0.01277 | 1.16E-09 | 4.62E-08 |
| 203215_s_at | MYO6     | -0.00493 | 0.003614 | 0.019892 |
| 203216_s_at | MYO6     | -0.00524 | 0.004415 | 0.023391 |
| 203217_s_at | ST3GAL5  | 0.011192 | 0.000707 | 0.005229 |
| 203220_s_at | TLE1     | 0.012642 | 9.7E-08  | 2.2E-06  |
| 203221_at   | TLE1     | 0.015416 | 2.01E-09 | 7.54E-08 |
| 203222_s_at | TLE1     | 0.006533 | 0.00702  | 0.033856 |
| 203228_at   | PAFAH1B3 | 0.004244 | 0.009724 | 0.043716 |
| 203233_at   | IL4R     | 0.00847  | 0.000115 | 0.001113 |
| 203236_s_at | LGALS9   | 0.007153 | 7.32E-05 | 0.000756 |
| 203240_at   | FCGBP    | 0.007449 | 0.000786 | 0.005695 |
| 203244_at   | PEX5     | -0.00865 | 0.00177  | 0.011079 |
| 203256_at   | CDH3     | 0.019117 | 1.27E-09 | 4.99E-08 |
| 203261_at   | DCTN6    | -0.00551 | 5.27E-05 | 0.00057  |
| 203265_s_at | MAP2K4   | -0.00515 | 0.00477  | 0.024944 |
| 203266_s_at | MAP2K4   | -0.00508 | 0.007248 | 0.034748 |
| 203272_s_at | TUSC2    | -0.00514 | 0.005399 | 0.027458 |
| 203273_s_at | TUSC2    | -0.00593 | 6.58E-05 | 0.00069  |
| 203274_at   | F8A1     | -0.00852 | 6.36E-05 | 0.000671 |
| 203276_at   | LMNB1    | 0.006618 | 0.002432 | 0.014385 |
| 203278_s_at | PHF21A   | 0.006125 | 0.001509 | 0.009692 |
| 203280_at   | SAFB2    | -0.00647 | 1.05E-05 | 0.000137 |
| 203281_s_at | UBA7     | 0.006819 | 0.001713 | 0.010789 |
| 203282_at   | GBE1     | -0.00665 | 0.006944 | 0.033534 |
| 203293_s_at | LMAN1    | -0.00591 | 0.004923 | 0.025558 |
| 203300_x_at | AP1S2    | 0.015345 | 1.77E-07 | 3.77E-06 |
| 203302_at   | DCK      | 0.011664 | 0.000386 | 0.003129 |
| 203303_at   | DYNLT3   | -0.00448 | 0.007339 | 0.035059 |
| 203305_at   | F13A1    | 0.00862  | 0.004304 | 0.022932 |
| 203307_at   | GNL1     | 0.00492  | 0.005247 | 0.026836 |
| 203313_s_at | TGIF1    | 0.006948 | 0.006714 | 0.032578 |
| 203316_s_at | SNRPE    | 0.004578 | 0.000416 | 0.003343 |
| 203320_at   | SH2B3    | 0.00515  | 0.005614 | 0.028273 |
| 203321_s_at | ADNP2    | -0.00564 | 0.001672 | 0.010563 |
| 203323_at   | CAV2     | 0.00613  | 0.004227 | 0.022603 |
| 203324_s_at | CAV2     | 0.008335 | 0.000941 | 0.006628 |
| 203329_at   | PTPRM    | -0.00333 | 0.001215 | 0.008113 |
| 203332_s_at | INPP5D   | 0.011089 | 3.15E-06 | 4.79E-05 |
| 203335_at   | PHYH     | -0.01898 | 1.19E-16 | 1.06E-13 |
| 203339_at   | SLC25A12 | -0.00727 | 0.000498 | 0.003908 |
| 203340_s_at | SLC25A12 | -0.00591 | 0.000165 | 0.001523 |
| 203343_at   | UGDH     | -0.00953 | 0.000759 | 0.005539 |
| 203344_s_at | RBBP8    | 0.00654  | 0.002761 | 0.015941 |
| 203350_at   | AP1G1    | -0.0063  | 2.94E-06 | 4.5E-05  |

|             |          |          |          |          |
|-------------|----------|----------|----------|----------|
| 203354_s_at | PSD3     | 0.010212 | 0.002481 | 0.0146   |
| 203355_s_at | PSD3     | 0.011978 | 0.000222 | 0.001956 |
| 203371_s_at | NDUFB3   | -0.00526 | 0.000226 | 0.001986 |
| 203372_s_at | SOCS2    | -0.01213 | 6.7E-06  | 9.33E-05 |
| 203381_s_at | APOE     | -0.02406 | 2.76E-07 | 5.61E-06 |
| 203382_s_at | APOE     | -0.0155  | 1.6E-06  | 2.62E-05 |
| 203385_at   | DGKA     | 0.028551 | 1.78E-12 | 2.03E-10 |
| 203397_s_at | GALNT3   | 0.01178  | 0.00011  | 0.001072 |
| 203402_at   | KCNAB2   | -0.01464 | 1.18E-09 | 4.7E-08  |
| 203405_at   | PSMG1    | -0.00639 | 0.006527 | 0.031858 |
| 203407_at   | PPL      | 0.006641 | 0.006711 | 0.032573 |
| 203414_at   | MMD      | 0.008406 | 0.000133 | 0.001258 |
| 203416_at   | CD53     | 0.032262 | 1.65E-11 | 1.34E-09 |
| 203423_at   | RBP1     | 0.017175 | 1.43E-10 | 8.16E-09 |
| 203431_s_at | ARHGAP32 | -0.01107 | 3.21E-05 | 0.00037  |
| 203433_at   | MTHFS    | -0.01538 | 5.58E-14 | 1.01E-11 |
| 203434_s_at | MME      | -0.02626 | 1.38E-12 | 1.65E-10 |
| 203435_s_at | MME      | -0.02719 | 1.86E-14 | 4.56E-12 |
| 203438_at   | STC2     | -0.01835 | 2.69E-08 | 7.08E-07 |
| 203439_s_at | STC2     | -0.01158 | 1.87E-07 | 3.96E-06 |
| 203440_at   | CDH2     | -0.00911 | 0.000573 | 0.00439  |
| 203441_s_at | CDH2     | -0.00997 | 2.34E-05 | 0.000278 |
| 203449_s_at | TERF1    | -0.00422 | 0.006391 | 0.031344 |
| 203454_s_at | ATOX1    | -0.00774 | 0.00845  | 0.039076 |
| 203455_s_at | SAT1     | 0.004061 | 0.006748 | 0.032684 |
| 203458_at   | SPR      | -0.00741 | 0.001192 | 0.007994 |
| 203464_s_at | EPN2     | 0.005011 | 0.003046 | 0.017293 |
| 203465_at   | MRPL19   | -0.00805 | 8.53E-06 | 0.000115 |
| 203466_at   | MPV17    | -0.00782 | 0.002737 | 0.015831 |
| 203468_at   | CDK10    | -0.00646 | 0.000219 | 0.001936 |
| 203469_s_at | CDK10    | -0.00591 | 0.001439 | 0.00932  |
| 203470_s_at | PLEK     | 0.008682 | 0.000592 | 0.004515 |
| 203471_s_at | PLEK     | 0.020664 | 8.3E-10  | 3.51E-08 |
| 203474_at   | IQGAP2   | -0.02011 | 3.56E-12 | 3.66E-10 |
| 203476_at   | TPBG     | 0.019206 | 1.81E-11 | 1.44E-09 |
| 203478_at   | NDUFC1   | -0.00777 | 1.72E-07 | 3.68E-06 |
| 203484_at   | SEC61G   | 0.006141 | 0.004547 | 0.023978 |
| 203485_at   | RTN1     | 0.008997 | 0.002463 | 0.014526 |
| 203490_at   | ELF4     | 0.006942 | 9.88E-05 | 0.000981 |
| 203499_at   | EPHA2    | 0.006898 | 0.000493 | 0.003874 |
| 203500_at   | GCDH     | -0.01539 | 1.45E-08 | 4.14E-07 |
| 203501_at   | PGCP     | -0.00697 | 2.45E-05 | 0.000291 |
| 203504_s_at | ABCA1    | -0.01086 | 5.87E-05 | 0.000628 |
| 203508_at   | TNFRSF1B | 0.014002 | 2.33E-08 | 6.22E-07 |
| 203510_at   | MET      | 0.005785 | 0.000274 | 0.002333 |
| 203516_at   | SNTA1    | -0.00981 | 1.29E-07 | 2.85E-06 |
| 203523_at   | LSP1     | 0.012049 | 2.29E-06 | 3.62E-05 |
| 203524_s_at | MPST     | -0.0063  | 0.005617 | 0.028273 |
| 203528_at   | SEMA4D   | 0.007944 | 0.003202 | 0.01801  |

|             |          |          |          |          |
|-------------|----------|----------|----------|----------|
| 203531_at   | CUL5     | -0.0076  | 0.006183 | 0.030495 |
| 203533_s_at | CUL5     | -0.00769 | 0.000184 | 0.001664 |
| 203535_at   | S100A9   | 0.011648 | 1.73E-06 | 2.82E-05 |
| 203536_s_at | CIAO1    | -0.00747 | 0.00011  | 0.001074 |
| 203537_at   | PRPSAP2  | -0.00772 | 0.001382 | 0.009035 |
| 203542_s_at | KLF9     | -0.01047 | 0.000336 | 0.002778 |
| 203543_s_at | KLF9     | -0.01884 | 2.86E-09 | 1.03E-07 |
| 203546_at   | IPO13    | -0.0157  | 1.67E-10 | 9.35E-09 |
| 203547_at   | CD4      | 0.013847 | 2.46E-07 | 5.05E-06 |
| 203548_s_at | LPL      | -0.01358 | 0.001097 | 0.007483 |
| 203549_s_at | LPL      | -0.01584 | 0.000188 | 0.001697 |
| 203551_s_at | COX11    | -0.00887 | 4.67E-06 | 6.76E-05 |
| 203554_x_at | PTTG1    | 0.009894 | 9.18E-05 | 0.000922 |
| 203556_at   | ZHX2     | 0.004865 | 0.006593 | 0.032111 |
| 203557_s_at | PCBD1    | -0.00949 | 6.4E-05  | 0.000673 |
| 203558_at   | CUL7     | -0.00462 | 0.008419 | 0.03899  |
| 203559_s_at | ABP1     | -0.02761 | 2.17E-08 | 5.85E-07 |
| 203560_at   | GGH      | -0.02228 | 1.21E-10 | 7.13E-09 |
| 203561_at   | FCGR2A   | 0.016127 | 5.59E-07 | 1.05E-05 |
| 203562_at   | FEZ1     | 0.008234 | 0.003847 | 0.020899 |
| 203565_s_at | MNAT1    | -0.00608 | 0.003708 | 0.020302 |
| 203566_s_at | AGL      | -0.00881 | 0.000185 | 0.001675 |
| 203569_s_at | OFD1     | 0.005998 | 0.00341  | 0.018971 |
| 203570_at   | LOXL1    | 0.006121 | 0.001805 | 0.011242 |
| 203594_at   | RTCD1    | -0.00895 | 6.44E-08 | 1.52E-06 |
| 203603_s_at | ZEB2     | 0.013563 | 0.000391 | 0.003163 |
| 203606_at   | NDUFS6   | -0.00536 | 2.69E-05 | 0.000315 |
| 203608_at   | ALDH5A1  | -0.01956 | 1.75E-08 | 4.85E-07 |
| 203609_s_at | ALDH5A1  | -0.01388 | 4.38E-08 | 1.09E-06 |
| 203619_s_at | FAIM2    | 0.007503 | 7.63E-05 | 0.000784 |
| 203620_s_at | FCHSD2   | 0.006117 | 0.009877 | 0.044282 |
| 203627_at   | IGF1R    | -0.0126  | 1.79E-05 | 0.00022  |
| 203628_at   | IGF1R    | -0.00849 | 0.000974 | 0.0068   |
| 203633_at   | CPT1A    | -0.0049  | 0.00243  | 0.014376 |
| 203634_s_at | CPT1A    | -0.00977 | 0.00183  | 0.011371 |
| 203635_at   | DSCR3    | -0.00939 | 0.000717 | 0.00529  |
| 203636_at   | MID1     | 0.00763  | 0.002334 | 0.013887 |
| 203637_s_at | MID1     | 0.011005 | 0.000206 | 0.001834 |
| 203638_s_at | FGFR2    | -0.00715 | 0.007813 | 0.036759 |
| 203645_s_at | CD163    | 0.022266 | 1.05E-09 | 4.25E-08 |
| 203646_at   | FDX1     | -0.00824 | 6.58E-06 | 9.19E-05 |
| 203647_s_at | FDX1     | -0.01168 | 1.37E-12 | 1.64E-10 |
| 203658_at   | SLC25A20 | -0.01411 | 0.000132 | 0.001255 |
| 203661_s_at | TMOD1    | 0.00895  | 0.00104  | 0.007168 |
| 203663_s_at | COX5A    | -0.00731 | 1.68E-08 | 4.69E-07 |
| 203665_at   | HMOX1    | -0.01089 | 0.00027  | 0.002301 |
| 203668_at   | MAN2C1   | -0.0044  | 0.004995 | 0.025852 |
| 203671_at   | TPMT     | -0.01396 | 8.11E-10 | 3.45E-08 |
| 203672_x_at | TPMT     | -0.0093  | 2.42E-09 | 8.83E-08 |

|             |          |          |          |          |
|-------------|----------|----------|----------|----------|
| 203673_at   | TG       | -0.00713 | 0.000269 | 0.002295 |
| 203676_at   | GNS      | -0.0069  | 0.010138 | 0.04525  |
| 203682_s_at | IVD      | -0.01532 | 6.5E-09  | 2.08E-07 |
| 203689_s_at | FMR1     | -0.0073  | 0.00167  | 0.010556 |
| 203691_at   | PI3      | 0.006714 | 0.001285 | 0.008482 |
| 203693_s_at | E2F3     | -0.00663 | 0.00054  | 0.004176 |
| 203695_s_at | DFNA5    | -0.01168 | 0.00065  | 0.004882 |
| 203697_at   | FRZB     | 0.014351 | 6.55E-06 | 9.16E-05 |
| 203698_s_at | FRZB     | 0.014342 | 3.5E-05  | 0.0004   |
| 203699_s_at | DIO2     | -0.0146  | 0.000191 | 0.001722 |
| 203702_s_at | TTLL4    | 0.004277 | 0.002348 | 0.013958 |
| 203711_s_at | HIBCH    | -0.02203 | 4.42E-17 | 5.79E-14 |
| 203714_s_at | TBCE     | -0.00466 | 0.004963 | 0.025732 |
| 203715_at   | TBCE     | -0.00684 | 0.00759  | 0.03599  |
| 203716_s_at | DPP4     | -0.01354 | 0.000102 | 0.00101  |
| 203717_at   | DPP4     | -0.01141 | 0.000613 | 0.004636 |
| 203722_at   | ALDH4A1  | -0.01821 | 1.02E-06 | 1.78E-05 |
| 203725_at   | GADD45A  | -0.01393 | 1.18E-12 | 1.44E-10 |
| 203726_s_at | LAMA3    | 0.008001 | 0.005516 | 0.027891 |
| 203727_at   | SKIV2L   | -0.00568 | 0.00038  | 0.003087 |
| 203729_at   | EMP3     | 0.007788 | 0.001077 | 0.007376 |
| 203732_at   | TRIP4    | -0.0088  | 2.72E-06 | 4.21E-05 |
| 203733_at   | DEXI     | -0.00643 | 0.002864 | 0.016416 |
| 203741_s_at | ADCY7    | 0.008709 | 0.001189 | 0.007976 |
| 203742_s_at | TDG      | 0.005677 | 0.007347 | 0.03507  |
| 203753_at   | TCF4     | 0.015756 | 1.99E-06 | 3.2E-05  |
| 203758_at   | CTSO     | 0.006987 | 0.005649 | 0.02842  |
| 203760_s_at | SLA      | 0.009438 | 2.37E-06 | 3.74E-05 |
| 203761_at   | SLA      | 0.018409 | 9.36E-09 | 2.82E-07 |
| 203767_s_at | STS      | 0.006493 | 0.006602 | 0.032139 |
| 203769_s_at | STS      | 0.008837 | 0.001038 | 0.007162 |
| 203774_at   | MTR      | -0.00508 | 0.003688 | 0.020209 |
| 203775_at   | SLC25A13 | -0.01769 | 1.58E-11 | 1.3E-09  |
| 203779_s_at | MPZL2    | 0.013537 | 1.05E-07 | 2.37E-06 |
| 203780_at   | MPZL2    | 0.011259 | 5.68E-05 | 0.000609 |
| 203782_s_at | POLRMT   | -0.00725 | 0.008607 | 0.039614 |
| 203784_s_at | DDX28    | 0.005679 | 0.000444 | 0.003543 |
| 203785_s_at | DDX28    | -0.0103  | 6.85E-06 | 9.5E-05  |
| 203786_s_at | TPD52L1  | 0.007651 | 0.006752 | 0.032696 |
| 203787_at   | SSBP2    | 0.010243 | 0.000102 | 0.001014 |
| 203790_s_at | HRSP12   | -0.02733 | 6.31E-17 | 7.32E-14 |
| 203791_at   | DMXL1    | -0.01075 | 5.47E-08 | 1.32E-06 |
| 203792_x_at | PCGF2    | -0.00696 | 0.007319 | 0.034996 |
| 203799_at   | CD302    | 0.014289 | 7.36E-06 | 0.000101 |
| 203803_at   | PCYOX1   | -0.01223 | 0.001524 | 0.009761 |
| 203812_at   |          | 0.012024 | 6.22E-05 | 0.000659 |
| 203814_s_at | NQO2     | -0.02558 | 3.1E-12  | 3.22E-10 |
| 203817_at   | GUCY1B3  | 0.007551 | 0.006279 | 0.03089  |
| 203824_at   | TSPAN8   | 0.017889 | 1.75E-05 | 0.000216 |

|             |           |          |          |          |
|-------------|-----------|----------|----------|----------|
| 203827_at   | WIP11     | -0.01035 | 3.68E-07 | 7.2E-06  |
| 203831_at   | R3HDM2    | -0.00611 | 0.003001 | 0.017074 |
| 203851_at   | IGFBP6    | 0.023619 | 1.23E-10 | 7.23E-09 |
| 203853_s_at | GAB2      | 0.004643 | 0.005957 | 0.02963  |
| 203854_at   | CFI       | -0.01105 | 0.000554 | 0.004263 |
| 203859_s_at | PALM      | -0.00789 | 1.84E-05 | 0.000225 |
| 203860_at   | PCCA      | -0.01107 | 8.12E-12 | 7.41E-10 |
| 203880_at   | COX17     | -0.00516 | 0.007651 | 0.036211 |
| 203882_at   | IRF9      | 0.006872 | 0.000951 | 0.006667 |
| 203886_s_at | FBLN2     | 0.00956  | 2.32E-05 | 0.000277 |
| 203892_at   | WFDC2     | 0.030867 | 5.17E-15 | 1.67E-12 |
| 203894_at   | TUBG2     | -0.00756 | 4.18E-05 | 0.000466 |
| 203896_s_at | PLCB4     | 0.011989 | 6.97E-05 | 0.000724 |
| 203897_at   | LYRM1     | -0.00755 | 0.000232 | 0.002026 |
| 203900_at   | KIAA0467  | -0.00638 | 0.000158 | 0.001467 |
| 203903_s_at | HEPH      | 0.00961  | 0.001404 | 0.009127 |
| 203907_s_at | IQSEC1    | -0.00723 | 0.001414 | 0.009182 |
| 203908_at   | SLC4A4    | -0.03082 | 1.18E-18 | 2.72E-15 |
| 203910_at   | ARHGAP29  | 0.008304 | 0.000587 | 0.004484 |
| 203911_at   | RAP1GAP   | -0.00745 | 0.007782 | 0.036686 |
| 203913_s_at | HPGD      | -0.02112 | 5.47E-09 | 1.77E-07 |
| 203914_x_at | HPGD      | -0.02861 | 1.82E-14 | 4.5E-12  |
| 203917_at   | CXADR     | 0.011798 | 2.29E-06 | 3.62E-05 |
| 203922_s_at | CYBB      | 0.022284 | 1.38E-09 | 5.36E-08 |
| 203923_s_at | CYBB      | 0.021464 | 3.06E-09 | 1.07E-07 |
| 203924_at   | GSTA1     | -0.03167 | 1.34E-12 | 1.62E-10 |
| 203925_at   | GCLM      | -0.00784 | 0.003129 | 0.01766  |
| 203926_x_at | ATP5D     | -0.00633 | 0.003972 | 0.021483 |
| 203927_at   | NFKBIE    | 0.006337 | 6.16E-05 | 0.000654 |
| 203928_x_at | MAPT      | -0.01768 | 2.85E-06 | 4.38E-05 |
| 203929_s_at | MAPT      | -0.02271 | 4.66E-12 | 4.58E-10 |
| 203930_s_at | MAPT      | -0.02478 | 4.24E-06 | 6.24E-05 |
| 203932_at   | HLA-DMB   | 0.015358 | 1.93E-07 | 4.07E-06 |
| 203933_at   | RAB11FIP3 | -0.01306 | 2.56E-08 | 6.77E-07 |
| 203935_at   | ACVR1     | -0.00524 | 0.003105 | 0.017562 |
| 203936_s_at | MMP9      | 0.005115 | 0.003903 | 0.021158 |
| 203944_x_at | BTN2A1    | 0.005857 | 0.008275 | 0.038443 |
| 203945_at   | ARG2      | -0.00583 | 1.71E-05 | 0.000211 |
| 203946_s_at | ARG2      | -0.0111  | 0.000162 | 0.001498 |
| 203950_s_at | CLCN6     | -0.01337 | 1.37E-05 | 0.000173 |
| 203953_s_at | CLDN3     | 0.009353 | 1.63E-05 | 0.000202 |
| 203954_x_at | CLDN3     | 0.010129 | 0.000126 | 0.00121  |
| 203955_at   | KIAA0649  | -0.00737 | 0.003753 | 0.020508 |
| 203961_at   | NEBL      | -0.00909 | 0.00103  | 0.007115 |
| 203964_at   | NMI       | 0.01211  | 4.62E-08 | 1.14E-06 |
| 203966_s_at | PPM1A     | -0.00663 | 0.000801 | 0.005799 |
| 203971_at   | SLC31A1   | -0.01299 | 2.55E-12 | 2.74E-10 |
| 203972_s_at | PEX3      | -0.00882 | 6.82E-05 | 0.000711 |
| 203979_at   | CYP27A1   | -0.01309 | 2.32E-09 | 8.51E-08 |

|             |          |          |          |          |
|-------------|----------|----------|----------|----------|
| 203980_at   | FABP4    | 0.008245 | 0.004013 | 0.02166  |
| 203981_s_at | ABCD4    | -0.006   | 0.003848 | 0.020899 |
| 203984_s_at | CASP9    | -0.00555 | 0.007595 | 0.036    |
| 203986_at   | FAM47E   | -0.01141 | 1.09E-06 | 1.9E-05  |
| 204000_at   | GNB5     | -0.00867 | 1.11E-05 | 0.000144 |
| 204006_s_at | FCGR3A   | 0.012553 | 8.42E-05 | 0.000853 |
| 204007_at   | FCGR3B   | 0.007656 | 0.004688 | 0.024553 |
| 204009_s_at | KRAS     | 0.004679 | 0.006214 | 0.030617 |
| 204014_at   | DUSP4    | 0.006119 | 0.005701 | 0.028603 |
| 204016_at   | LARS2    | -0.01076 | 0.000534 | 0.004146 |
| 204017_at   | KDEL3    | 0.011343 | 0.000502 | 0.003931 |
| 204018_x_at | HBA1     | 0.016691 | 0.006162 | 0.030416 |
| 204019_s_at | SH3YL1   | -0.01158 | 6.57E-07 | 1.21E-05 |
| 204027_s_at | METTL1   | -0.01282 | 4.77E-07 | 9.12E-06 |
| 204032_at   | BCAR3    | -0.00817 | 0.000557 | 0.004282 |
| 204036_at   | LPAR1    | 0.016216 | 2.53E-06 | 3.95E-05 |
| 204037_at   | LPAR1    | 0.020161 | 4.69E-10 | 2.16E-08 |
| 204038_s_at | LPAR1    | 0.018387 | 2.73E-08 | 7.17E-07 |
| 204040_at   | RNF144A  | 0.007227 | 0.002753 | 0.015904 |
| 204041_at   | MAOB     | -0.0143  | 1.99E-08 | 5.45E-07 |
| 204043_at   | TCN2     | -0.01544 | 1.06E-06 | 1.86E-05 |
| 204044_at   | QPRT     | -0.02187 | 3.1E-11  | 2.29E-09 |
| 204051_s_at | SFRP4    | 0.006502 | 0.007454 | 0.035504 |
| 204053_x_at | PTEN     | 0.005006 | 0.005191 | 0.026604 |
| 204057_at   | IRF8     | 0.018352 | 2.07E-11 | 1.6E-09  |
| 204060_s_at | PRKX     | 0.011557 | 0.002208 | 0.01326  |
| 204061_at   | PRKX     | 0.01182  | 0.001973 | 0.012134 |
| 204066_s_at | AGAP1    | -0.01268 | 0.000228 | 0.002001 |
| 204067_at   | SUOX     | -0.01421 | 9.49E-08 | 2.17E-06 |
| 204071_s_at | TOPORS   | -0.00743 | 0.002592 | 0.015146 |
| 204073_s_at | C11orf9  | 0.007422 | 0.001921 | 0.011859 |
| 204075_s_at | KIAA0562 | -0.00928 | 0.000221 | 0.001948 |
| 204083_s_at | TPM2     | 0.01423  | 3.11E-06 | 4.73E-05 |
| 204099_at   | SMARCD3  | 0.007836 | 0.00674  | 0.032674 |
| 204101_at   | MTM1     | -0.00761 | 0.001195 | 0.008009 |
| 204103_at   | CCL4     | 0.008417 | 0.000184 | 0.001663 |
| 204105_s_at | NRCAM    | -0.01246 | 9.4E-05  | 0.000939 |
| 204112_s_at | HNMT     | -0.00674 | 0.001335 | 0.008772 |
| 204114_at   | NID2     | 0.007873 | 0.00698  | 0.033701 |
| 204115_at   | GNG11    | 0.009968 | 6.35E-06 | 8.91E-05 |
| 204116_at   | IL2RG    | 0.025055 | 4.73E-10 | 2.17E-08 |
| 204118_at   | CD48     | 0.037055 | 1.78E-12 | 2.03E-10 |
| 204121_at   | GADD45G  | -0.00805 | 0.006157 | 0.030403 |
| 204122_at   | TYROBP   | 0.023049 | 2.62E-08 | 6.92E-07 |
| 204124_at   | SLC34A2  | 0.015271 | 0.001062 | 0.007285 |
| 204125_at   | NDUFAF1  | -0.01219 | 2.41E-06 | 3.78E-05 |
| 204130_at   | HSD11B2  | -0.01584 | 1.14E-06 | 1.97E-05 |
| 204137_at   | GPR137B  | -0.02087 | 2.03E-12 | 2.3E-10  |
| 204140_at   | TPST1    | 0.006484 | 0.001201 | 0.008036 |

|             |              |          |          |          |
|-------------|--------------|----------|----------|----------|
| 204142_at   | ENOSF1       | -0.01822 | 3.87E-12 | 3.92E-10 |
| 204143_s_at | ENOSF1       | -0.01621 | 5.56E-11 | 3.71E-09 |
| 204150_at   | STAB1        | 0.006337 | 0.005611 | 0.028273 |
| 204153_s_at | MFNG         | 0.00794  | 1.97E-05 | 0.00024  |
| 204157_s_at | SIK3         | -0.0092  | 0.001238 | 0.008241 |
| 204158_s_at | TCIRG1       | 0.008612 | 8.79E-05 | 0.000887 |
| 204162_at   | NDC80        | 0.008497 | 0.001597 | 0.010174 |
| 204167_at   | BTD          | -0.01586 | 2.26E-06 | 3.58E-05 |
| 204168_at   | MGST2        | -0.00793 | 1.83E-07 | 3.88E-06 |
| 204174_at   | ALOX5AP      | 0.025174 | 2.51E-10 | 1.29E-08 |
| 204178_s_at | RBM14        | -0.00497 | 0.007049 | 0.033967 |
| 204183_s_at | ADRBK2       | 0.007561 | 0.00102  | 0.00705  |
| 204185_x_at | PPID         | -0.00825 | 2.77E-07 | 5.62E-06 |
| 204188_s_at | RARG         | 0.004227 | 0.005131 | 0.026417 |
| 204192_at   | CD37         | 0.010275 | 4.66E-05 | 0.000513 |
| 204194_at   | BACH1        | 0.006882 | 0.00223  | 0.013381 |
| 204197_s_at | RUNX3        | 0.006288 | 0.002175 | 0.013097 |
| 204198_s_at | RUNX3        | 0.011606 | 0.000153 | 0.001423 |
| 204200_s_at | PDGFB        | -0.0066  | 8.56E-05 | 0.000866 |
| 204204_at   | SLC31A2      | -0.01195 | 0.000293 | 0.002471 |
| 204205_at   | APOBEC3G     | 0.018857 | 5.57E-07 | 1.04E-05 |
| 204213_at   | PIGR         | 0.00993  | 0.003518 | 0.019439 |
| 204220_at   | GMFG         | 0.021888 | 4.95E-09 | 1.61E-07 |
| 204221_x_at | GLIPR1       | 0.004915 | 0.008577 | 0.039525 |
| 204222_s_at | GLIPR1       | 0.017911 | 2.04E-08 | 5.57E-07 |
| 204223_at   | PRELP        | 0.007668 | 0.008583 | 0.039537 |
| 204224_s_at | GCH1         | -0.02227 | 1.6E-12  | 1.87E-10 |
| 204231_s_at | FAAH         | -0.00878 | 0.003405 | 0.018952 |
| 204232_at   | FCER1G       | 0.029307 | 7.45E-12 | 6.88E-10 |
| 204233_s_at | CHKA         | -0.00563 | 0.000473 | 0.003729 |
| 204236_at   | FLI1         | 0.011201 | 0.000127 | 0.001216 |
| 204242_s_at | ACOX3        | -0.00627 | 0.004749 | 0.024838 |
| 204245_s_at | RPP14        | -0.00615 | 0.009221 | 0.041889 |
| 204254_s_at | VDR          | -0.01046 | 6.05E-05 | 0.000644 |
| 204255_s_at | VDR          | -0.01229 | 5.77E-07 | 1.07E-05 |
| 204259_at   | MMP7         | 0.028636 | 3.56E-11 | 2.55E-09 |
| 204260_at   | CHGB         | -0.01255 | 0.0023   | 0.013725 |
| 204264_at   | CPT2         | -0.0124  | 2.68E-09 | 9.68E-08 |
| 204265_s_at | GP3M3        | 0.010232 | 2.87E-06 | 4.4E-05  |
| 204268_at   | S100A2       | 0.013479 | 5.7E-05  | 0.000611 |
| 204269_at   | PIM2         | 0.007133 | 0.000301 | 0.002526 |
| 204271_s_at | EDNRB        | 0.012284 | 0.00012  | 0.001157 |
| 204273_at   | EDNRB        | 0.00942  | 0.002341 | 0.013923 |
| 204279_at   | PSMB9        | 0.021265 | 6.1E-08  | 1.44E-06 |
| 204282_s_at | FARS2        | -0.00531 | 0.000664 | 0.004976 |
| 204283_at   | FARS2        | -0.0086  | 0.001614 | 0.010252 |
| 204285_s_at | PMAIP1       | 0.011452 | 0.001714 | 0.010789 |
| 204288_s_at | SORBS2       | 0.005739 | 0.007046 | 0.033959 |
| 204289_at   | LOC100506517 | -0.02385 | 1.05E-15 | 5.12E-13 |



|             |           |          |          |          |
|-------------|-----------|----------|----------|----------|
| 204290_s_at | ALDH6A1   | -0.02511 | 9.44E-17 | 9.14E-14 |
| 204294_at   | AMT       | -0.01446 | 1.31E-08 | 3.8E-07  |
| 204295_at   | SURF1     | -0.00696 | 0.000514 | 0.004013 |
| 204296_at   | DCTN1     | 0.005774 | 0.005159 | 0.026513 |
| 204300_at   | PET112L   | -0.01113 | 2.88E-05 | 0.000336 |
| 204301_at   | KBTBD11   | -0.01076 | 2.24E-05 | 0.000268 |
| 204304_s_at | PROM1     | 0.027981 | 2.91E-09 | 1.04E-07 |
| 204305_at   | MIPEP     | -0.00856 | 0.000743 | 0.005447 |
| 204306_s_at | CD151     | 0.010832 | 0.002459 | 0.014518 |
| 204310_s_at | NPR2      | -0.00644 | 0.000761 | 0.005551 |
| 204311_at   | ATP1B2    | -0.0114  | 0.00674  | 0.032674 |
| 204313_s_at | CREB1     | 0.006585 | 0.000342 | 0.002817 |
| 204316_at   | RGS10     | 0.008153 | 0.001007 | 0.006972 |
| 204319_s_at | RGS10     | 0.017636 | 3.14E-10 | 1.55E-08 |
| 204321_at   | NEO1      | -0.00694 | 0.000473 | 0.003729 |
| 204326_x_at | MT1X      | -0.01246 | 2.62E-05 | 0.000307 |
| 204328_at   | TMC6      | 0.013078 | 1.67E-08 | 4.65E-07 |
| 204345_at   | COL16A1   | 0.01107  | 2.75E-06 | 4.25E-05 |
| 204347_at   | AK4       | -0.02188 | 9.49E-10 | 3.93E-08 |
| 204348_s_at | AK4       | -0.01686 | 6.93E-11 | 4.46E-09 |
| 204351_at   | S100P     | 0.006853 | 0.002111 | 0.01278  |
| 204352_at   | TRAF5     | 0.010642 | 4.46E-06 | 6.52E-05 |
| 204358_s_at | FLRT2     | 0.008637 | 0.001244 | 0.008272 |
| 204359_at   | FLRT2     | 0.010282 | 0.000927 | 0.006547 |
| 204360_s_at | NAGLU     | -0.00756 | 0.007637 | 0.03615  |
| 204378_at   | BCAS1     | 0.008058 | 0.000434 | 0.003463 |
| 204379_s_at | FGFR3     | -0.01204 | 0.000107 | 0.001053 |
| 204385_at   | KYNU      | -0.01999 | 9.53E-09 | 2.86E-07 |
| 204388_s_at | MAOA      | -0.02429 | 1.89E-11 | 1.49E-09 |
| 204389_at   | MAOA      | -0.01944 | 2.97E-08 | 7.73E-07 |
| 204393_s_at | ACPP      | 0.010878 | 0.003658 | 0.020093 |
| 204395_s_at | GRK5      | 0.005747 | 0.008453 | 0.039076 |
| 204396_s_at | GRK5      | 0.006852 | 0.00869  | 0.039881 |
| 204415_at   | IFI6      | 0.01158  | 6.78E-06 | 9.43E-05 |
| 204416_x_at | APOC1     | 0.011019 | 0.003326 | 0.018581 |
| 204417_at   | GALC      | -0.00968 | 0.000335 | 0.00277  |
| 204421_s_at | FGF2      | 0.005816 | 0.009597 | 0.043217 |
| 204423_at   | MKLN1     | -0.0066  | 0.004974 | 0.025773 |
| 204425_at   | ARHGAP4   | 0.007211 | 0.001159 | 0.007813 |
| 204429_s_at | SLC2A5    | -0.01542 | 1.38E-06 | 2.31E-05 |
| 204430_s_at | SLC2A5    | -0.02971 | 3.86E-16 | 2.46E-13 |
| 204436_at   | PLEKHO2   | 0.011599 | 6.15E-08 | 1.46E-06 |
| 204438_at   | MRC1      | 0.017935 | 2.05E-06 | 3.29E-05 |
| 204439_at   | IFI44L    | 0.015043 | 4.16E-06 | 6.13E-05 |
| 204440_at   | CD83      | -0.00967 | 0.001403 | 0.009126 |
| 204442_x_at | LTBP4     | 0.005026 | 0.001134 | 0.00768  |
| 204446_s_at | ALOX5     | 0.011227 | 0.000135 | 0.00128  |
| 204447_at   | ProSAPiP1 | -0.01281 | 2.83E-08 | 7.41E-07 |
| 204455_at   | DST       | 0.010976 | 0.001156 | 0.007794 |

|             |         |          |          |          |
|-------------|---------|----------|----------|----------|
| 204456_s_at | GAS1    | 0.006037 | 0.001188 | 0.007971 |
| 204458_at   | PLA2G15 | -0.00722 | 0.000529 | 0.004115 |
| 204462_s_at | SLC16A2 | -0.00948 | 0.000973 | 0.006794 |
| 204464_s_at | EDNRA   | 0.012105 | 0.000169 | 0.00155  |
| 204470_at   | CXCL1   | 0.016784 | 4.81E-05 | 0.000527 |
| 204472_at   | GEM     | 0.011485 | 0.003056 | 0.017335 |
| 204476_s_at | PC      | -0.01502 | 2.07E-08 | 5.63E-07 |
| 204479_at   | OSTF1   | 0.006877 | 0.001259 | 0.008339 |
| 204483_at   | ENO3    | -0.00522 | 0.004133 | 0.022165 |
| 204485_s_at | TOM1L1  | -0.00724 | 0.00412  | 0.022114 |
| 204488_at   | DOLK    | -0.0092  | 3.53E-05 | 0.000402 |
| 204489_s_at | CD44    | 0.027475 | 7.15E-09 | 2.26E-07 |
| 204490_s_at | CD44    | 0.02378  | 2.97E-09 | 1.05E-07 |
| 204497_at   | ADCY9   | -0.00995 | 9.63E-05 | 0.000958 |
| 204501_at   | NOV     | 0.010703 | 3.74E-08 | 9.46E-07 |
| 204502_at   | SAMHD1  | 0.023741 | 5.4E-11  | 3.62E-09 |
| 204505_s_at | EPB49   | -0.00867 | 0.001162 | 0.007832 |
| 204510_at   | CDC7    | 0.012058 | 0.000354 | 0.002894 |
| 204517_at   | PPIC    | 0.005753 | 0.002031 | 0.012413 |
| 204524_at   | PDPK1   | -0.00877 | 0.002136 | 0.012898 |
| 204528_s_at | NAP1L1  | 0.009073 | 1.01E-12 | 1.27E-10 |
| 204532_x_at | UGT1A1  | -0.02214 | 1.75E-10 | 9.67E-09 |
| 204533_at   | CXCL10  | 0.007199 | 0.00544  | 0.027587 |
| 204534_at   | VTN     | -0.00706 | 0.004    | 0.021615 |
| 204545_at   | PEX6    | -0.00662 | 0.002308 | 0.013757 |
| 204547_at   | RAB40B  | -0.00759 | 8.33E-06 | 0.000113 |
| 204556_s_at | DZIP1   | -0.00666 | 0.000667 | 0.004992 |
| 204557_s_at | DZIP1   | -0.00784 | 0.004265 | 0.022757 |
| 204561_x_at | APOC2   | -0.00839 | 0.006007 | 0.029846 |
| 204562_at   | IRF4    | 0.007092 | 0.005494 | 0.027807 |
| 204563_at   | SELL    | 0.017942 | 1.36E-07 | 2.98E-06 |
| 204565_at   | ACOT13  | -0.01636 | 1.4E-12  | 1.66E-10 |
| 204579_at   | FGFR4   | -0.00766 | 2.58E-05 | 0.000304 |
| 204584_at   | L1CAM   | 0.008082 | 0.001601 | 0.01019  |
| 204588_s_at | SLC7A7  | -0.02781 | 9.12E-13 | 1.17E-10 |
| 204589_at   | NUAK1   | 0.013049 | 1.29E-05 | 0.000164 |
| 204593_s_at | SMCR7L  | -0.00796 | 0.004795 | 0.025036 |
| 204594_s_at | SMCR7L  | -0.00891 | 1.65E-05 | 0.000204 |
| 204595_s_at | STC1    | -0.01918 | 0.000118 | 0.00114  |
| 204596_s_at | STC1    | -0.01358 | 0.007298 | 0.034916 |
| 204604_at   | CDK14   | -0.01022 | 6.41E-07 | 1.18E-05 |
| 204606_at   | CCL21   | 0.028989 | 6.21E-12 | 5.89E-10 |
| 204607_at   | HMGCS2  | -0.01497 | 0.001495 | 0.009627 |
| 204608_at   | ASL     | -0.01645 | 5.85E-06 | 8.28E-05 |
| 204610_s_at | CCDC85B | 0.004285 | 0.005401 | 0.027464 |
| 204613_at   | PLCG2   | -0.00579 | 0.002576 | 0.015072 |
| 204615_x_at | IDI1    | -0.00656 | 4.16E-06 | 6.14E-05 |
| 204619_s_at | VCAN    | 0.014145 | 1.55E-05 | 0.000193 |
| 204620_s_at | VCAN    | 0.028539 | 2.44E-10 | 1.27E-08 |

|             |          |          |          |          |
|-------------|----------|----------|----------|----------|
| 204627_s_at | ITGB3    | 0.013552 | 0.000491 | 0.003863 |
| 204628_s_at | ITGB3    | 0.008488 | 0.010232 | 0.045571 |
| 204629_at   | PARVB    | -0.0119  | 7.59E-07 | 1.37E-05 |
| 204638_at   | ACP5     | -0.01864 | 2.91E-08 | 7.58E-07 |
| 204655_at   | CCL5     | 0.024526 | 4.16E-12 | 4.17E-10 |
| 204658_at   | TRA2A    | 0.008486 | 0.000183 | 0.001661 |
| 204661_at   | CD52     | 0.031382 | 1.08E-09 | 4.33E-08 |
| 204663_at   | ME3      | -0.00812 | 0.001391 | 0.009069 |
| 204664_at   | ALPP     | 0.005048 | 0.007841 | 0.036845 |
| 204668_at   | RNF24    | 0.008474 | 0.001752 | 0.010987 |
| 204669_s_at | RNF24    | 0.007862 | 0.000747 | 0.005469 |
| 204670_x_at | HLA-DRB1 | 0.01222  | 0.003104 | 0.017559 |
| 204675_at   | SRD5A1   | -0.00936 | 0.002153 | 0.012985 |
| 204680_s_at | RAPGEF5  | 0.008561 | 1.16E-05 | 0.00015  |
| 204681_s_at | RAPGEF5  | 0.006166 | 0.008969 | 0.040961 |
| 204683_at   | ICAM2    | 0.007344 | 0.003002 | 0.017074 |
| 204688_at   | SGCE     | 0.008708 | 0.000525 | 0.004087 |
| 204693_at   | CDC42EP1 | 0.008767 | 0.000188 | 0.001693 |
| 204694_at   | AFP      | -0.00478 | 0.000924 | 0.006536 |
| 204698_at   | ISG20    | 0.01905  | 4.61E-08 | 1.14E-06 |
| 204703_at   | IFT88    | -0.00655 | 4.7E-06  | 6.8E-05  |
| 204704_s_at | ALDOB    | -0.03335 | 3.97E-13 | 5.6E-11  |
| 204705_x_at | ALDOB    | -0.02816 | 8.19E-12 | 7.45E-10 |
| 204716_at   | CCDC6    | -0.00577 | 0.000532 | 0.004134 |
| 204718_at   | EPHB6    | 0.006115 | 0.001398 | 0.009099 |
| 204719_at   | ABCA8    | 0.013591 | 0.003781 | 0.020632 |
| 204720_s_at | DNAJC6   | -0.01252 | 8.3E-06  | 0.000112 |
| 204725_s_at | NCK1     | 0.007998 | 0.000587 | 0.004485 |
| 204731_at   | TGFBR3   | -0.01304 | 2.96E-06 | 4.53E-05 |
| 204741_at   | BICD1    | 0.005347 | 0.003854 | 0.020913 |
| 204745_x_at | MT1G     | -0.01228 | 0.002403 | 0.014255 |
| 204748_at   | PTGS2    | 0.010101 | 0.009217 | 0.041877 |
| 204755_x_at | HLF      | -0.00656 | 0.005462 | 0.02768  |
| 204774_at   | EVI2A    | 0.027611 | 8.96E-10 | 3.75E-08 |
| 204775_at   | CHAF1B   | 0.005789 | 0.001388 | 0.009058 |
| 204778_x_at | HOXB7    | 0.006617 | 0.000102 | 0.00101  |
| 204779_s_at | HOXB7    | 0.008725 | 0.00511  | 0.026324 |
| 204780_s_at | FAS      | 0.018252 | 1.06E-11 | 9.41E-10 |
| 204781_s_at | FAS      | 0.0129   | 1.19E-07 | 2.66E-06 |
| 204785_x_at | IFNAR2   | 0.012981 | 2.28E-08 | 6.13E-07 |
| 204786_s_at | IFNAR2   | 0.014124 | 2.54E-05 | 0.0003   |
| 204787_at   | VSIG4    | 0.009059 | 0.000135 | 0.001279 |
| 204789_at   | FMNL1    | 0.00507  | 0.010048 | 0.044902 |
| 204795_at   | PRR3     | 0.005968 | 0.002549 | 0.014934 |
| 204798_at   | MYB      | 0.015792 | 2.4E-06  | 3.77E-05 |
| 204803_s_at | RRAD     | 0.006618 | 0.010104 | 0.045124 |
| 204804_at   | TRIM21   | 0.00763  | 0.00198  | 0.012168 |
| 204806_x_at | HLA-F    | 0.013759 | 5.84E-06 | 8.28E-05 |
| 204809_at   | CLPX     | -0.00681 | 0.002275 | 0.013614 |

|             |              |          |          |          |
|-------------|--------------|----------|----------|----------|
| 204812_at   | ZW10         | -0.00879 | 0.00045  | 0.00358  |
| 204813_at   | MAPK10       | -0.00662 | 0.000176 | 0.001609 |
| 204817_at   | ESPL1        | -0.01276 | 6.02E-06 | 8.49E-05 |
| 204820_s_at | BTN3A2       | 0.014213 | 3.03E-06 | 4.62E-05 |
| 204821_at   | BTN3A3       | 0.005551 | 0.010353 | 0.046017 |
| 204824_at   | ENDOG        | -0.01226 | 3.26E-09 | 1.13E-07 |
| 204829_s_at | FOLR2        | 0.018197 | 1.02E-09 | 4.14E-08 |
| 204834_at   | FGL2         | 0.020831 | 1.93E-13 | 2.93E-11 |
| 204836_at   | GLDC         | -0.01787 | 3.26E-11 | 2.36E-09 |
| 204844_at   | ENPEP        | -0.02408 | 2.06E-10 | 1.11E-08 |
| 204845_s_at | ENPEP        | -0.02265 | 3.68E-07 | 7.2E-06  |
| 204846_at   | CP           | 0.024435 | 5.1E-08  | 1.25E-06 |
| 204856_at   | B3GNT3       | 0.005806 | 0.000547 | 0.004224 |
| 204860_s_at | LOC100510692 | 0.011932 | 0.00189  | 0.011699 |
| 204868_at   | ICT1         | -0.00656 | 3.62E-06 | 5.4E-05  |
| 204872_at   | TLE4         | 0.006755 | 0.006426 | 0.031462 |
| 204873_at   | PEX1         | -0.00988 | 0.000886 | 0.006323 |
| 204882_at   | ARHGAP25     | 0.01906  | 3.3E-09  | 1.14E-07 |
| 204885_s_at | MSLN         | 0.008444 | 1.63E-05 | 0.000202 |
| 204890_s_at | LCK          | 0.012783 | 7.56E-07 | 1.36E-05 |
| 204893_s_at | ZFYVE9       | -0.00605 | 0.000539 | 0.004174 |
| 204899_s_at | SAP30        | 0.005649 | 0.001317 | 0.00867  |
| 204912_at   | IL10RA       | 0.014318 | 1.28E-06 | 2.16E-05 |
| 204916_at   | RAMP1        | 0.005285 | 0.004081 | 0.021945 |
| 204922_at   | C11orf80     | 0.007142 | 0.000304 | 0.002538 |
| 204923_at   | SASH3        | 0.019559 | 1.05E-08 | 3.1E-07  |
| 204924_at   | TLR2         | 0.010618 | 0.001141 | 0.007716 |
| 204925_at   | CTNS         | -0.0091  | 9.19E-05 | 0.000923 |
| 204926_at   | INHBA        | 0.007816 | 0.005735 | 0.02871  |
| 204931_at   | TCF21        | 0.010567 | 0.000381 | 0.003092 |
| 204932_at   | TNFRSF11B    | 0.010196 | 3.33E-05 | 0.000383 |
| 204933_s_at | TNFRSF11B    | 0.007855 | 0.007177 | 0.034481 |
| 204934_s_at | HPN          | -0.01454 | 5.51E-05 | 0.000592 |
| 204951_at   | RHOH         | 0.021176 | 2.95E-09 | 1.05E-07 |
| 204953_at   | SNAP91       | 0.008984 | 0.001828 | 0.011363 |
| 204955_at   | SRPX         | 0.008472 | 4.8E-05  | 0.000526 |
| 204959_at   | MNDA         | 0.026116 | 3.16E-10 | 1.56E-08 |
| 204960_at   | PTPRCAP      | 0.009689 | 3.38E-05 | 0.000388 |
| 204961_s_at | NCF1         | 0.007411 | 0.001761 | 0.011035 |
| 204962_s_at | CENPA        | 0.006048 | 0.006115 | 0.030233 |
| 204963_at   | SSPN         | 0.0091   | 0.001604 | 0.010206 |
| 204964_s_at | SSPN         | 0.008609 | 2.4E-06  | 3.77E-05 |
| 204965_at   | GC           | -0.01995 | 0.004097 | 0.022011 |
| 204970_s_at | MAFG         | -0.00623 | 0.001051 | 0.007231 |
| 204971_at   | CSTA         | 0.022937 | 2.97E-09 | 1.05E-07 |
| 204972_at   | OAS2         | 0.011331 | 5.92E-06 | 8.37E-05 |
| 204973_at   | GJB1         | -0.01259 | 7.61E-05 | 0.000783 |
| 204977_at   | DDX10        | -0.01691 | 6.29E-07 | 1.16E-05 |
| 204979_s_at | SH3BGR       | -0.01059 | 4.51E-06 | 6.58E-05 |

|             |          |          |          |          |
|-------------|----------|----------|----------|----------|
| 204981_at   | SLC22A18 | -0.0161  | 6.65E-06 | 9.28E-05 |
| 204982_at   | GIT2     | 0.008478 | 0.000675 | 0.005036 |
| 204989_s_at | ITGB4    | 0.00882  | 0.001318 | 0.008675 |
| 204994_at   | MX2      | 0.010316 | 0.000127 | 0.001215 |
| 204997_at   | GPD1     | -0.01619 | 0.000255 | 0.0022   |
| 205008_s_at | CIB2     | 0.005964 | 0.002463 | 0.014526 |
| 205012_s_at | HAGH     | -0.01772 | 9.61E-11 | 5.93E-09 |
| 205014_at   | FGFBP1   | 0.006306 | 0.000951 | 0.006667 |
| 205032_at   | ITGA2    | 0.00633  | 0.001085 | 0.007427 |
| 205033_s_at | DEFA1    | 0.007916 | 0.006337 | 0.031135 |
| 205038_at   | IKZF1    | 0.007297 | 0.001601 | 0.010187 |
| 205039_s_at | IKZF1    | 0.019427 | 3.79E-10 | 1.82E-08 |
| 205041_s_at | ORM1     | 0.006236 | 0.003716 | 0.02034  |
| 205044_at   | GABRP    | 0.022107 | 7.03E-12 | 6.55E-10 |
| 205045_at   | AKAP10   | -0.00435 | 0.005007 | 0.025893 |
| 205052_at   | AUH      | -0.01498 | 3.28E-14 | 6.68E-12 |
| 205057_s_at | IDUA     | 0.004749 | 0.009143 | 0.041645 |
| 205059_s_at | IDUA     | 0.005676 | 0.003153 | 0.017779 |
| 205060_at   | PARG     | -0.00688 | 0.003819 | 0.0208   |
| 205063_at   | SIP1     | 0.007262 | 0.00346  | 0.019191 |
| 205065_at   | ENPP1    | -0.01335 | 1.52E-05 | 0.000189 |
| 205066_s_at | ENPP1    | -0.01214 | 8.18E-05 | 0.000831 |
| 205067_at   | IL1B     | 0.00938  | 0.004029 | 0.021728 |
| 205068_s_at | ARHGAP26 | 0.00644  | 0.00205  | 0.012512 |
| 205073_at   | CYP2J2   | -0.01433 | 3.65E-06 | 5.45E-05 |
| 205074_at   | SLC22A5  | -0.01783 | 3.26E-11 | 2.36E-09 |
| 205075_at   | SERPINF2 | -0.01678 | 4.87E-10 | 2.23E-08 |
| 205076_s_at | MTMR11   | -0.0075  | 0.002227 | 0.013367 |
| 205079_s_at | MPDZ     | -0.01147 | 3.77E-05 | 0.000426 |
| 205081_at   | CRIP1    | 0.029961 | 1.55E-15 | 6.41E-13 |
| 205082_s_at | AOX1     | -0.01735 | 8.66E-06 | 0.000116 |
| 205083_at   | AOX1     | -0.02439 | 5.95E-09 | 1.91E-07 |
| 205093_at   | PLEKHA6  | -0.00844 | 0.001339 | 0.008794 |
| 205095_s_at | ATP6V0A1 | -0.01132 | 0.003658 | 0.020093 |
| 205110_s_at | FGF13    | 0.009822 | 8.49E-05 | 0.000859 |
| 205114_s_at | CCL3     | 0.010076 | 0.000912 | 0.006468 |
| 205119_s_at | FPR1     | 0.005178 | 0.009444 | 0.042673 |
| 205120_s_at | SGCB     | -0.00674 | 0.011303 | 0.049254 |
| 205121_at   | SGCB     | -0.00912 | 0.000156 | 0.00145  |
| 205131_x_at | CLEC11A  | 0.005192 | 0.000227 | 0.001995 |
| 205133_s_at | HSPE1    | -0.00762 | 5.03E-06 | 7.21E-05 |
| 205137_x_at | USH1C    | -0.01296 | 0.000107 | 0.001047 |
| 205141_at   | ANG      | -0.01163 | 0.000297 | 0.0025   |
| 205147_x_at | NCF4     | 0.009043 | 0.000231 | 0.002026 |
| 205149_s_at | CLCN4    | -0.00645 | 0.000107 | 0.001051 |
| 205150_s_at | TRIL     | 0.008494 | 0.008308 | 0.038551 |
| 205157_s_at | KRT17    | 0.008954 | 3.71E-05 | 0.000421 |
| 205158_at   | RNASE4   | -0.00843 | 0.0021   | 0.012732 |
| 205159_at   | CSF2RB   | 0.019959 | 9.17E-08 | 2.1E-06  |

|             |         |          |          |          |
|-------------|---------|----------|----------|----------|
| 205164_at   | GCAT    | -0.01057 | 1.8E-05  | 0.000221 |
| 205166_at   | CAPN5   | -0.00873 | 0.002846 | 0.016338 |
| 205168_at   | DDR2    | 0.011393 | 0.000236 | 0.002061 |
| 205169_at   | RBBP5   | -0.00746 | 0.002084 | 0.012669 |
| 205173_x_at | CD58    | 0.0059   | 0.003993 | 0.021586 |
| 205174_s_at | QPCT    | 0.011887 | 0.000583 | 0.004457 |
| 205175_s_at | KHK     | -0.01956 | 2E-10    | 1.08E-08 |
| 205194_at   | PSPH    | -0.01302 | 4.58E-07 | 8.79E-06 |
| 205201_at   | GLI3    | -0.00696 | 0.000946 | 0.006647 |
| 205203_at   | PLD1    | -0.01382 | 9.81E-07 | 1.73E-05 |
| 205208_at   | ALDH1L1 | -0.02434 | 1.38E-11 | 1.17E-09 |
| 205211_s_at | RIN1    | 0.006044 | 0.003083 | 0.01746  |
| 205213_at   | ACAP1   | 0.008727 | 6.19E-05 | 0.000656 |
| 205214_at   | STK17B  | 0.021593 | 7.99E-11 | 4.96E-09 |
| 205216_s_at | APOH    | -0.03754 | 7.7E-14  | 1.32E-11 |
| 205217_at   | TIMM8A  | -0.00613 | 0.002345 | 0.013942 |
| 205219_s_at | GALK2   | -0.0088  | 0.002942 | 0.016789 |
| 205221_at   | HGD     | -0.01809 | 5.53E-12 | 5.29E-10 |
| 205222_at   | EHHADH  | -0.01977 | 3.56E-14 | 7.08E-12 |
| 205229_s_at | COCH    | -0.01371 | 0.000125 | 0.001193 |
| 205231_s_at | EPM2A   | -0.01289 | 5.59E-08 | 1.34E-06 |
| 205233_s_at | PAFAH2  | -0.00959 | 0.000723 | 0.005332 |
| 205234_at   | SLC16A4 | -0.01207 | 5.57E-08 | 1.34E-06 |
| 205238_at   | TRMT2B  | -0.0083  | 0.001112 | 0.007561 |
| 205242_at   | CXCL13  | 0.009391 | 0.004784 | 0.024988 |
| 205243_at   | SLC13A3 | -0.03798 | 1.23E-16 | 1.06E-13 |
| 205244_s_at | SLC13A3 | -0.03865 | 4.29E-17 | 5.79E-14 |
| 205246_at   | PEX13   | -0.00933 | 0.000279 | 0.002368 |
| 205254_x_at | TCF7    | 0.004974 | 0.002285 | 0.013656 |
| 205255_x_at | TCF7    | 0.005687 | 0.006744 | 0.03268  |
| 205260_s_at | ACYP1   | 0.009003 | 0.000302 | 0.002526 |
| 205267_at   | POU2AF1 | 0.029515 | 8.74E-08 | 2.01E-06 |
| 205269_at   | LCP2    | 0.015964 | 1.01E-06 | 1.78E-05 |
| 205270_s_at | LCP2    | 0.019839 | 5.21E-07 | 9.84E-06 |
| 205271_s_at | CDK20   | -0.00546 | 0.004611 | 0.024253 |
| 205273_s_at | PITRM1  | -0.00845 | 0.000126 | 0.001204 |
| 205278_at   | GAD1    | -0.01532 | 2.55E-06 | 3.97E-05 |
| 205285_s_at | FYB     | 0.021116 | 1.9E-08  | 5.22E-07 |
| 205286_at   | TFAP2C  | 0.009418 | 0.000518 | 0.004037 |
| 205291_at   | IL2RB   | 0.014733 | 5.98E-10 | 2.63E-08 |
| 205295_at   | CKMT2   | -0.01251 | 0.000351 | 0.002876 |
| 205298_s_at | BTN2A2  | 0.00626  | 0.005897 | 0.029394 |
| 205301_s_at | OGG1    | -0.00761 | 0.000146 | 0.00137  |
| 205303_at   | KCNJ8   | 0.017272 | 1.35E-06 | 2.27E-05 |
| 205304_s_at | KCNJ8   | 0.019063 | 1.86E-07 | 3.94E-06 |
| 205306_x_at | KMO     | -0.03152 | 4.73E-13 | 6.5E-11  |
| 205307_s_at | KMO     | -0.03193 | 1.27E-14 | 3.28E-12 |
| 205311_at   | DDC     | -0.03181 | 3.25E-15 | 1.19E-12 |
| 205312_at   | SPI1    | 0.006789 | 0.001055 | 0.007244 |

|             |          |          |          |          |
|-------------|----------|----------|----------|----------|
| 205315_s_at | SNTB2    | -0.0079  | 0.001442 | 0.009335 |
| 205322_s_at | MTF1     | 0.006536 | 0.000201 | 0.001797 |
| 205328_at   | CLDN10   | -0.00809 | 0.000111 | 0.001079 |
| 205329_s_at | SNX4     | -0.00752 | 6.74E-10 | 2.92E-08 |
| 205336_at   | PVALB    | -0.0176  | 7.19E-06 | 9.94E-05 |
| 205341_at   | EHD2     | 0.008148 | 0.000258 | 0.002226 |
| 205342_s_at | SULT1C2  | -0.01086 | 0.000665 | 0.004978 |
| 205343_at   | SULT1C2  | -0.01158 | 4.67E-10 | 2.16E-08 |
| 205345_at   | BARD1    | 0.006333 | 0.011098 | 0.048631 |
| 205349_at   | GNA15    | 0.005131 | 0.003157 | 0.017794 |
| 205350_at   | CRABP1   | -0.01438 | 2.51E-07 | 5.14E-06 |
| 205351_at   | GGCX     | -0.00811 | 0.010572 | 0.046813 |
| 205352_at   | SERPINI1 | -0.0151  | 1.78E-06 | 2.9E-05  |
| 205353_s_at | PEBP1    | -0.00953 | 5.56E-08 | 1.34E-06 |
| 205355_at   | ACADSB   | -0.02161 | 1.27E-15 | 5.67E-13 |
| 205361_s_at | PFDN4    | 0.00739  | 0.009297 | 0.042151 |
| 205363_at   | BBOX1    | -0.00841 | 0.001427 | 0.009256 |
| 205364_at   | ACOX2    | -0.03126 | 9.91E-16 | 5.02E-13 |
| 205365_at   | HOXB6    | 0.007991 | 0.001629 | 0.010329 |
| 205368_at   | FAM131B  | 0.00651  | 0.003849 | 0.020899 |
| 205369_x_at | DBT      | -0.0121  | 7.14E-07 | 1.3E-05  |
| 205376_at   | INPP4B   | 0.008745 | 0.000537 | 0.004163 |
| 205379_at   | CBR3     | 0.011335 | 4.39E-05 | 0.000485 |
| 205380_at   | PDZK1    | -0.01507 | 3.93E-15 | 1.35E-12 |
| 205381_at   | LRRC17   | 0.007611 | 0.007054 | 0.033981 |
| 205382_s_at | CFD      | 0.010491 | 3.45E-05 | 0.000394 |
| 205392_s_at | CCL14    | 0.01272  | 0.000687 | 0.005109 |
| 205395_s_at | MRE11A   | 0.005803 | 0.004103 | 0.022032 |
| 205403_at   | IL1R2    | 0.007242 | 0.007229 | 0.034662 |
| 205412_at   | ACAT1    | -0.01825 | 1E-12    | 1.27E-10 |
| 205413_at   | MPPED2   | -0.00574 | 0.005339 | 0.027205 |
| 205419_at   | GPR183   | 0.018235 | 2.98E-05 | 0.000346 |
| 205420_at   | PEX7     | -0.00705 | 0.005587 | 0.028179 |
| 205422_s_at | ITGBL1   | 0.012407 | 0.0003   | 0.002516 |
| 205430_at   | BMP5     | 0.009483 | 0.000888 | 0.00633  |
| 205431_s_at | BMP5     | 0.009492 | 0.003186 | 0.017936 |
| 205434_s_at | AAK1     | -0.0085  | 0.001734 | 0.010891 |
| 205440_s_at | NPY1R    | 0.013274 | 0.00023  | 0.002016 |
| 205441_at   | OCEL1    | -0.00797 | 0.010108 | 0.045134 |
| 205442_at   | MFAP3L   | -0.01471 | 1.02E-10 | 6.13E-09 |
| 205443_at   | SNAPC1   | 0.006191 | 0.005133 | 0.02642  |
| 205448_s_at | MAP3K12  | -0.01208 | 3.82E-09 | 1.29E-07 |
| 205455_at   | MST1R    | 0.003034 | 0.01035  | 0.046011 |
| 205456_at   | CD3E     | 0.007819 | 0.001372 | 0.008973 |
| 205457_at   | C6orf106 | -0.00492 | 0.000272 | 0.002319 |
| 205464_at   | SCNN1B   | -0.00955 | 1.13E-06 | 1.95E-05 |
| 205465_x_at | HS3ST1   | 0.003659 | 0.006426 | 0.031462 |
| 205473_at   | ATP6V1B1 | -0.00757 | 0.011193 | 0.048931 |
| 205480_s_at | UGP2     | -0.0048  | 0.005748 | 0.028763 |

|             |         |          |          |          |
|-------------|---------|----------|----------|----------|
| 205483_s_at | ISG15   | 0.008431 | 0.00033  | 0.002729 |
| 205484_at   | SIT1    | 0.009558 | 7.27E-05 | 0.000752 |
| 205487_s_at | VGLL1   | 0.005214 | 0.00378  | 0.020628 |
| 205488_at   | GZMA    | 0.029332 | 4.77E-12 | 4.66E-10 |
| 205489_at   | CRYM    | -0.01885 | 2.02E-14 | 4.79E-12 |
| 205490_x_at | GJB3    | 0.005618 | 0.001108 | 0.007542 |
| 205495_s_at | GNLY    | 0.006812 | 0.00437  | 0.023196 |
| 205498_at   | GHR     | -0.02012 | 3.5E-11  | 2.53E-09 |
| 205499_at   | SRPX2   | 0.011896 | 3.58E-05 | 0.000408 |
| 205500_at   | C5      | -0.00897 | 0.000499 | 0.00391  |
| 205501_at   | PDE10A  | -0.01761 | 2.97E-07 | 5.99E-06 |
| 205502_at   | CYP17A1 | -0.02333 | 3.39E-08 | 8.68E-07 |
| 205504_at   | BTK     | 0.010021 | 1.24E-05 | 0.000159 |
| 205505_at   | GCNT1   | 0.007908 | 0.0004   | 0.003223 |
| 205506_at   | VIL1    | -0.0144  | 8.52E-06 | 0.000115 |
| 205508_at   | SCN1B   | 0.005082 | 0.002687 | 0.015598 |
| 205512_s_at | AIFM1   | -0.01663 | 5.73E-08 | 1.37E-06 |
| 205528_s_at | RUNX1T1 | 0.012529 | 2.37E-05 | 0.000281 |
| 205530_at   | ETFDH   | -0.0203  | 1.72E-16 | 1.31E-13 |
| 205542_at   | STEAP1  | -0.00953 | 0.000777 | 0.005641 |
| 205543_at   | HSPA4L  | -0.00858 | 6.79E-06 | 9.43E-05 |
| 205547_s_at | TAGLN   | 0.020215 | 0.001015 | 0.007022 |
| 205552_s_at | OAS1    | 0.008888 | 0.009268 | 0.042057 |
| 205557_at   | BPI     | -0.01327 | 0.000128 | 0.00122  |
| 205560_at   | PCSK5   | -0.00413 | 0.00993  | 0.044466 |
| 205561_at   | KCTD17  | 0.006195 | 0.00706  | 0.033989 |
| 205564_at   | PAGE4   | 0.006836 | 0.003392 | 0.018892 |
| 205569_at   | LAMP3   | 0.010385 | 0.000358 | 0.002925 |
| 205572_at   | ANGPT2  | 0.008823 | 0.003283 | 0.018373 |
| 205579_at   | HRH1    | 0.008623 | 0.002745 | 0.015864 |
| 205580_s_at | HRH1    | 0.006092 | 0.007831 | 0.036805 |
| 205582_s_at | GGT5    | 0.007197 | 0.000299 | 0.002514 |
| 205585_at   | ETV6    | 0.006128 | 0.004558 | 0.024017 |
| 205587_at   | FGFR1OP | -0.00657 | 0.000572 | 0.004386 |
| 205588_s_at | FGFR1OP | -0.00798 | 8.96E-05 | 0.000902 |
| 205591_at   | OLFM1   | 0.006188 | 0.000596 | 0.004529 |
| 205592_at   | SLC4A1  | -0.0273  | 1.45E-11 | 1.21E-09 |
| 205599_at   | TRAF1   | 0.007717 | 0.001052 | 0.007233 |
| 205607_s_at | SCYL3   | 0.00565  | 0.000483 | 0.003801 |
| 205614_x_at | MST1    | -0.01198 | 2.51E-05 | 0.000297 |
| 205617_at   | PRRG2   | -0.00552 | 0.00186  | 0.011534 |
| 205624_at   | CPA3    | 0.036499 | 8.18E-14 | 1.39E-11 |
| 205625_s_at | CALB1   | -0.02191 | 3.17E-08 | 8.15E-07 |
| 205626_s_at | CALB1   | -0.01681 | 3.63E-08 | 9.2E-07  |
| 205633_s_at | ALAS1   | -0.01056 | 0.000228 | 0.002007 |
| 205640_at   | ALDH3B1 | -0.01045 | 0.000666 | 0.004987 |
| 205642_at   | CEP110  | 0.007706 | 7.02E-05 | 0.000729 |
| 205653_at   | CTSG    | 0.028011 | 7.16E-16 | 3.8E-13  |
| 205654_at   | C4BPA   | 0.005502 | 0.004257 | 0.022732 |



|             |         |          |          |          |
|-------------|---------|----------|----------|----------|
| 205657_at   | HAAO    | -0.00913 | 0.00725  | 0.034748 |
| 205659_at   | HDAC9   | 0.011504 | 9.49E-05 | 0.000948 |
| 205665_at   | TSPAN9  | -0.00587 | 0.000771 | 0.005614 |
| 205666_at   | FMO1    | -0.01836 | 6.43E-09 | 2.05E-07 |
| 205667_at   | WRN     | 0.005798 | 0.003249 | 0.018217 |
| 205668_at   | LY75    | 0.008991 | 0.002104 | 0.012747 |
| 205671_s_at | HLA-DOB | 0.012124 | 7.33E-06 | 0.000101 |
| 205673_s_at | ASB9    | -0.02131 | 1.2E-12  | 1.47E-10 |
| 205675_at   | MTPP    | -0.03433 | 3.84E-13 | 5.52E-11 |
| 205676_at   | CYP27B1 | -0.02768 | 2.89E-08 | 7.53E-07 |
| 205681_at   | BCL2A1  | 0.014317 | 1.32E-05 | 0.000168 |
| 205682_x_at | APOM    | -0.02655 | 1.16E-07 | 2.59E-06 |
| 205683_x_at | TPSAB1  | 0.021395 | 1.01E-10 | 6.11E-09 |
| 205685_at   | CD86    | 0.006663 | 0.002882 | 0.016512 |
| 205686_s_at | CD86    | 0.013317 | 1.5E-06  | 2.48E-05 |
| 205689_at   | PCNXL2  | 0.00589  | 0.001231 | 0.008205 |
| 205694_at   | TYRP1   | -0.01378 | 0.00024  | 0.002087 |
| 205696_s_at | GFRA1   | 0.013413 | 1.9E-05  | 0.000231 |
| 205710_at   | LRP2    | -0.01759 | 1.55E-08 | 4.38E-07 |
| 205711_x_at | ATP5C1  | -0.00553 | 0.000151 | 0.001413 |
| 205712_at   | PTPRD   | -0.0198  | 4.28E-10 | 2.01E-08 |
| 205713_s_at | COMP    | 0.013453 | 4.21E-07 | 8.14E-06 |
| 205714_s_at | ZMYND10 | 0.006745 | 4.37E-05 | 0.000484 |
| 205715_at   | BST1    | -0.00956 | 3.76E-05 | 0.000425 |
| 205719_s_at | PAH     | -0.02136 | 2.13E-09 | 7.88E-08 |
| 205723_at   | CNTFR   | 0.006705 | 0.005164 | 0.026531 |
| 205728_at   | ODZ1    | -0.00865 | 0.000368 | 0.002995 |
| 205729_at   | OSMR    | 0.009429 | 0.007637 | 0.03615  |
| 205730_s_at | ABLM3   | -0.0136  | 5.95E-05 | 0.000634 |
| 205733_at   | BLM     | 0.006419 | 0.001515 | 0.00972  |
| 205735_s_at | AFF3    | 0.00531  | 0.002355 | 0.013992 |
| 205738_s_at | FABP3   | -0.00948 | 0.000117 | 0.001133 |
| 205750_at   | BPHL    | -0.02134 | 4.95E-14 | 9.18E-12 |
| 205751_at   | SH3GL2  | -0.01612 | 3.85E-07 | 7.48E-06 |
| 205752_s_at | GSTM5   | 0.014536 | 5.03E-08 | 1.23E-06 |
| 205756_s_at | F8      | -0.0064  | 0.001578 | 0.010061 |
| 205757_at   | ENTPD5  | -0.02703 | 6.4E-15  | 2.01E-12 |
| 205758_at   | CD8A    | 0.011369 | 3.61E-06 | 5.4E-05  |
| 205760_s_at | OGG1    | -0.01758 | 1.17E-12 | 1.44E-10 |
| 205761_s_at | DUS4L   | -0.01335 | 1.18E-06 | 2.02E-05 |
| 205765_at   | CYP3A5  | -0.01549 | 0.000116 | 0.001125 |
| 205768_s_at | SLC27A2 | -0.02213 | 3.91E-09 | 1.32E-07 |
| 205769_at   | SLC27A2 | -0.02248 | 3.4E-09  | 1.16E-07 |
| 205770_at   | GSR     | -0.00683 | 0.007633 | 0.036147 |
| 205776_at   | FMO5    | -0.01755 | 1.39E-06 | 2.31E-05 |
| 205777_at   | DUSP9   | -0.01242 | 0.000268 | 0.002294 |
| 205782_at   | FGF7    | 0.014407 | 0.000225 | 0.001982 |
| 205786_s_at | ITGAM   | 0.019775 | 4.93E-09 | 1.61E-07 |
| 205789_at   | CD1D    | 0.010058 | 0.000121 | 0.00116  |

|             |         |          |          |          |
|-------------|---------|----------|----------|----------|
| 205790_at   | SKAP1   | 0.007333 | 0.001523 | 0.009761 |
| 205791_x_at | ZNF221  | 0.004147 | 0.003995 | 0.02159  |
| 205796_at   | TCP11L1 | -0.00796 | 0.007009 | 0.033812 |
| 205798_at   | IL7R    | 0.027301 | 6.83E-12 | 6.39E-10 |
| 205799_s_at | SLC3A1  | -0.0095  | 2E-07    | 4.21E-06 |
| 205810_s_at | WASL    | -0.0051  | 0.001747 | 0.010962 |
| 205816_at   | ITGB8   | 0.008248 | 0.008027 | 0.037541 |
| 205820_s_at | APOC3   | -0.00723 | 0.006101 | 0.030186 |
| 205821_at   | KLRK1   | 0.005876 | 0.007344 | 0.03507  |
| 205824_at   | HSPB2   | 0.00462  | 0.004074 | 0.021917 |
| 205826_at   | MYOM2   | -0.01762 | 1.37E-07 | 3E-06    |
| 205831_at   | CD2     | 0.011679 | 8.45E-07 | 1.51E-05 |
| 205838_at   | GYPA    | -0.00704 | 0.009986 | 0.044652 |
| 205843_x_at | CRAT    | -0.00671 | 0.0019   | 0.011749 |
| 205844_at   | VNN1    | -0.02442 | 5.12E-08 | 1.25E-06 |
| 205848_at   | GAS2    | -0.00794 | 0.000829 | 0.00596  |
| 205850_s_at | GABRB3  | -0.01031 | 0.000178 | 0.001619 |
| 205857_at   | SLC18A2 | -0.00819 | 0.000937 | 0.006607 |
| 205859_at   | LY86    | 0.014836 | 5.05E-08 | 1.24E-06 |
| 205860_x_at | FOLH1   | -0.03454 | 1.18E-13 | 1.93E-11 |
| 205862_at   | GREB1   | -0.0085  | 0.001385 | 0.009051 |
| 205882_x_at | ADD3    | -0.01205 | 1.06E-09 | 4.27E-08 |
| 205884_at   | ITGA4   | 0.007721 | 0.00394  | 0.021325 |
| 205885_s_at | ITGA4   | 0.007355 | 0.005704 | 0.028606 |
| 205887_x_at | MSH3    | -0.00515 | 0.000453 | 0.003596 |
| 205890_s_at | GABBR1  | 0.018288 | 2.35E-09 | 8.59E-08 |
| 205892_s_at | FABP1   | -0.03944 | 4.82E-11 | 3.27E-09 |
| 205894_at   | ARSE    | -0.02324 | 3.96E-05 | 0.000446 |
| 205896_at   | SLC22A4 | -0.02319 | 1.88E-12 | 2.13E-10 |
| 205898_at   | CX3CR1  | 0.012969 | 1.6E-06  | 2.62E-05 |
| 205901_at   | PNOG    | 0.005925 | 0.005845 | 0.029168 |
| 205907_s_at | OMD     | 0.008229 | 0.000315 | 0.002626 |
| 205908_s_at | OMD     | 0.00748  | 0.005356 | 0.027257 |
| 205910_s_at | CEL     | -0.01531 | 6.04E-05 | 0.000643 |
| 205911_at   | PTH1R   | -0.01405 | 2.27E-07 | 4.71E-06 |
| 205922_at   | VNN2    | 0.013753 | 1.92E-09 | 7.24E-08 |
| 205931_s_at | CREB5   | 0.009246 | 0.000303 | 0.002537 |
| 205934_at   | PLCL1   | -0.01473 | 1.08E-08 | 3.18E-07 |
| 205939_at   | CYP3A7  | -0.02413 | 1.08E-09 | 4.33E-08 |
| 205942_s_at | ACSM3   | -0.01484 | 3.3E-07  | 6.57E-06 |
| 205945_at   | IL6R    | -0.00997 | 0.000257 | 0.002218 |
| 205963_s_at | DNAJA3  | -0.01064 | 3.73E-07 | 7.28E-06 |
| 205972_at   | SLC38A3 | -0.007   | 0.000935 | 0.0066   |
| 205978_at   | KL      | -0.02936 | 2.18E-15 | 8.11E-13 |
| 205981_s_at | ING2    | -0.00488 | 0.003089 | 0.017488 |
| 205983_at   | DPEP1   | -0.02621 | 7.45E-13 | 9.94E-11 |
| 205985_x_at | CLCNKB  | -0.01076 | 0.002618 | 0.015277 |
| 205987_at   | CD1C    | 0.026758 | 1.44E-10 | 8.2E-09  |
| 205988_at   | CD84    | 0.011988 | 2.21E-08 | 5.95E-07 |

|             |            |          |          |          |
|-------------|------------|----------|----------|----------|
| 205991_s_at | PRRX1      | 0.01545  | 1.81E-07 | 3.84E-06 |
| 205996_s_at | AK2        | -0.0089  | 8.05E-05 | 0.000819 |
| 205999_x_at | CYP3A4     | -0.015   | 1.74E-07 | 3.7E-06  |
| 206009_at   | ITGA9      | 0.005568 | 0.007756 | 0.036589 |
| 206011_at   | CASP1      | 0.020614 | 1.73E-10 | 9.62E-09 |
| 206022_at   | NDP        | 0.006516 | 0.009717 | 0.043696 |
| 206023_at   | NMU        | 0.008252 | 0.001029 | 0.007112 |
| 206024_at   | HPD        | -0.03847 | 1.09E-08 | 3.19E-07 |
| 206030_at   | ASPA       | -0.02625 | 1.39E-15 | 5.99E-13 |
| 206034_at   | SERPINB8   | 0.008857 | 0.001101 | 0.007505 |
| 206035_at   | REL        | 0.007775 | 0.000946 | 0.006648 |
| 206043_s_at | ATP2C2     | -0.00505 | 0.005874 | 0.029289 |
| 206054_at   | KNG1       | -0.01911 | 3.18E-07 | 6.37E-06 |
| 206059_at   | ZNF91      | -0.00556 | 0.000593 | 0.004517 |
| 206065_s_at | DPYS       | -0.02546 | 5.67E-11 | 3.75E-09 |
| 206068_s_at | ACADL      | -0.01547 | 7.09E-10 | 3.04E-08 |
| 206069_s_at | ACADL      | -0.01951 | 3.02E-11 | 2.23E-09 |
| 206074_s_at | HMGA1      | 0.004585 | 0.009925 | 0.044461 |
| 206085_s_at | CTH        | -0.01239 | 8.79E-07 | 1.57E-05 |
| 206089_at   | NELL1      | -0.0198  | 3.33E-09 | 1.14E-07 |
| 206093_x_at | TNXA       | 0.005996 | 0.011124 | 0.048716 |
| 206094_x_at | UGT1A1     | -0.02352 | 2.84E-11 | 2.12E-09 |
| 206097_at   | SLC22A18AS | -0.00668 | 0.005438 | 0.027582 |
| 206099_at   | PRKCH      | 0.009156 | 0.000742 | 0.00544  |
| 206116_s_at | TPM1       | 0.01073  | 1.01E-07 | 2.28E-06 |
| 206117_at   | TPM1       | 0.011608 | 3.73E-06 | 5.56E-05 |
| 206118_at   | STAT4      | 0.012628 | 1.38E-05 | 0.000174 |
| 206119_at   | BHMT       | -0.02282 | 3.83E-11 | 2.7E-09  |
| 206121_at   | AMPD1      | 0.01198  | 0.000119 | 0.001143 |
| 206127_at   | ELK3       | 0.004622 | 0.009244 | 0.041977 |
| 206129_s_at | ARSB       | -0.01821 | 1.66E-07 | 3.57E-06 |
| 206133_at   | XAF1       | 0.013913 | 3.56E-07 | 7.01E-06 |
| 206134_at   | ADAMDEC1   | 0.009906 | 0.000544 | 0.004201 |
| 206136_at   | FZD5       | -0.00585 | 0.001738 | 0.010913 |
| 206149_at   | CHP2       | -0.01073 | 5.34E-05 | 0.000577 |
| 206150_at   | CD27       | 0.007998 | 0.000137 | 0.001294 |
| 206153_at   | CYP4F11    | -0.01331 | 0.007801 | 0.036739 |
| 206155_at   | ABCC2      | -0.02853 | 3.78E-11 | 2.67E-09 |
| 206170_at   | ADRB2      | 0.008901 | 0.000174 | 0.00159  |
| 206171_at   | ADORA3     | 0.005516 | 0.010831 | 0.047723 |
| 206181_at   | SLAMF1     | 0.005883 | 0.011034 | 0.048391 |
| 206197_at   | NME5       | -0.0079  | 6.46E-06 | 9.06E-05 |
| 206206_at   | CD180      | 0.005708 | 0.00152  | 0.009742 |
| 206214_at   | PLA2G7     | 0.016838 | 1.04E-06 | 1.82E-05 |
| 206217_at   | EDA        | -0.0085  | 4.28E-05 | 0.000474 |
| 206219_s_at | VAV1       | 0.008562 | 0.00017  | 0.001561 |
| 206221_at   | RASA3      | 0.005782 | 0.00102  | 0.00705  |
| 206226_at   | HRG        | -0.0203  | 7.18E-08 | 1.68E-06 |
| 206237_s_at | NRG1       | -0.00869 | 0.002084 | 0.012669 |

|             |          |          |          |          |
|-------------|----------|----------|----------|----------|
| 206239_s_at | SPINK1   | -0.02551 | 1.57E-06 | 2.59E-05 |
| 206242_at   | TM4SF5   | -0.01099 | 1.18E-06 | 2.02E-05 |
| 206248_at   | PRKCE    | -0.01198 | 0.00102  | 0.00705  |
| 206249_at   | MAP3K13  | -0.00872 | 0.000517 | 0.004031 |
| 206253_at   | DLG2     | -0.00716 | 0.001794 | 0.011198 |
| 206254_at   | EGF      | -0.04379 | 2.99E-20 | 1.33E-16 |
| 206259_at   | PROC     | -0.0209  | 2.72E-11 | 2.04E-09 |
| 206263_at   | FMO4     | -0.01738 | 5.18E-09 | 1.68E-07 |
| 206269_at   | GCM1     | -0.01032 | 0.00107  | 0.007329 |
| 206296_x_at | MAP4K1   | 0.018894 | 7.47E-11 | 4.71E-09 |
| 206298_at   | ARHGAP22 | 0.00644  | 0.003834 | 0.020863 |
| 206313_at   | HLA-DOA  | 0.011604 | 1.31E-06 | 2.2E-05  |
| 206318_at   | SPINLW1  | 0.007996 | 0.008565 | 0.03948  |
| 206323_x_at | OPHN1    | 0.005781 | 0.008926 | 0.040829 |
| 206325_at   | SERPINA6 | -0.02875 | 1.34E-10 | 7.75E-09 |
| 206332_s_at | IFI16    | 0.024518 | 7.59E-16 | 3.93E-13 |
| 206336_at   | CXCL6    | 0.014418 | 0.001495 | 0.009628 |
| 206337_at   | CCR7     | 0.008423 | 0.001297 | 0.008553 |
| 206341_at   | IL2RA    | 0.006567 | 0.00329  | 0.018402 |
| 206343_s_at | NRG1     | -0.01128 | 0.000391 | 0.003166 |
| 206346_at   | PRLR     | -0.02754 | 8.61E-15 | 2.56E-12 |
| 206347_at   | PDK3     | -0.00455 | 0.010659 | 0.047131 |
| 206348_s_at | PDK3     | -0.01304 | 1.79E-05 | 0.00022  |
| 206350_at   | APCS     | 0.007228 | 0.000208 | 0.001847 |
| 206355_at   | GNAL     | -0.00569 | 0.005329 | 0.027174 |
| 206363_at   | MAF      | -0.01953 | 1.3E-09  | 5.06E-08 |
| 206366_x_at | XCL1     | 0.01636  | 1.4E-09  | 5.45E-08 |
| 206369_s_at | PIK3CG   | 0.01244  | 1.86E-06 | 3E-05    |
| 206370_at   | PIK3CG   | 0.004983 | 0.011035 | 0.048391 |
| 206383_s_at | G3BP2    | -0.00526 | 0.005934 | 0.02956  |
| 206385_s_at | ANK3     | -0.0081  | 3.2E-08  | 8.21E-07 |
| 206391_at   | RARRES1  | 0.013343 | 0.000205 | 0.001829 |
| 206396_at   | SLC1A1   | -0.01642 | 1.18E-06 | 2.02E-05 |
| 206401_s_at | MAPT     | -0.01919 | 5.57E-07 | 1.04E-05 |
| 206407_s_at | CCL13    | 0.010704 | 2.56E-05 | 0.000301 |
| 206412_at   | FER      | 0.007278 | 0.001391 | 0.009069 |
| 206420_at   | IGSF6    | 0.021492 | 1.06E-08 | 3.13E-07 |
| 206431_x_at | TBC1D9B  | -0.00574 | 0.000392 | 0.003172 |
| 206440_at   | LIN7A    | -0.00723 | 0.001751 | 0.010981 |
| 206457_s_at | DIO1     | -0.03474 | 1.63E-13 | 2.58E-11 |
| 206459_s_at | WNT2B    | 0.006203 | 0.002297 | 0.013711 |
| 206460_at   | AJAP1    | -0.00697 | 0.011224 | 0.049007 |
| 206461_x_at | MT1H     | -0.0116  | 0.00018  | 0.001638 |
| 206469_x_at | AKR7A3   | -0.02637 | 3.59E-12 | 3.67E-10 |
| 206483_at   | LRRC6    | -0.00606 | 0.00027  | 0.002302 |
| 206484_s_at | XPNPEP2  | -0.04216 | 4.48E-16 | 2.77E-13 |
| 206488_s_at | CD36     | 0.01178  | 0.001818 | 0.011318 |
| 206492_at   | FHIT     | -0.01865 | 7.88E-12 | 7.23E-10 |
| 206496_at   | FMO3     | 0.011757 | 7.76E-05 | 0.000796 |

|             |           |          |          |          |
|-------------|-----------|----------|----------|----------|
| 206499_s_at | RCC1      | 0.0055   | 0.004574 | 0.024088 |
| 206500_s_at | C14orf106 | 0.017507 | 9.52E-11 | 5.89E-09 |
| 206501_x_at | ETV1      | 0.005756 | 0.007817 | 0.036767 |
| 206513_at   | AIM2      | 0.018388 | 4.87E-07 | 9.27E-06 |
| 206514_s_at | CYP4F2    | -0.03316 | 4E-12    | 4.03E-10 |
| 206515_at   | CYP4F3    | -0.02772 | 6.79E-12 | 6.38E-10 |
| 206519_x_at | SIGLEC6   | 0.006746 | 0.000971 | 0.006782 |
| 206520_x_at | SIGLEC6   | 0.006959 | 0.000854 | 0.006119 |
| 206522_at   | MGAM      | -0.02746 | 6.32E-14 | 1.12E-11 |
| 206527_at   | ABAT      | -0.02831 | 7.91E-11 | 4.92E-09 |
| 206535_at   | SLC2A2    | -0.028   | 3.54E-10 | 1.72E-08 |
| 206538_at   | MRAS      | 0.006328 | 0.003191 | 0.017962 |
| 206539_s_at | CYP4F12   | -0.00628 | 0.000469 | 0.003704 |
| 206540_at   | GLB1L     | -0.01492 | 0.000979 | 0.006833 |
| 206541_at   | KLKB1     | -0.0107  | 4.25E-07 | 8.23E-06 |
| 206542_s_at | SMARCA2   | 0.005246 | 0.000199 | 0.001777 |
| 206545_at   | CD28      | 0.015177 | 5.97E-08 | 1.42E-06 |
| 206560_s_at | MIA       | 0.005892 | 0.002437 | 0.014404 |
| 206562_s_at | CSNK1A1   | 0.005138 | 0.007861 | 0.036907 |
| 206572_x_at | ZNF85     | 0.00683  | 0.003625 | 0.019938 |
| 206576_s_at | CEACAM1   | -0.01439 | 0.000168 | 0.001541 |
| 206580_s_at | EFEMP2    | 0.008983 | 3.84E-05 | 0.000434 |
| 206584_at   | LY96      | 0.024611 | 1.3E-08  | 3.76E-07 |
| 206587_at   | CCT6B     | -0.00608 | 0.00296  | 0.016873 |
| 206589_at   | GFI1      | 0.006892 | 0.002147 | 0.01295  |
| 206592_s_at | AP3D1     | -0.00518 | 0.004783 | 0.024988 |
| 206595_at   | CST6      | 0.007151 | 0.001352 | 0.008862 |
| 206599_at   | SLC16A5   | 0.009302 | 2.24E-07 | 4.66E-06 |
| 206600_s_at | SLC16A5   | 0.013885 | 4.52E-08 | 1.12E-06 |
| 206610_s_at | F11       | -0.02092 | 1.23E-14 | 3.21E-12 |
| 206625_at   | PRPH2     | -0.00602 | 0.004688 | 0.024553 |
| 206628_at   | SLC5A1    | -0.01623 | 0.000295 | 0.002482 |
| 206632_s_at | APOBEC3B  | 0.006793 | 0.004318 | 0.022976 |
| 206636_at   | RASA2     | 0.010518 | 3.47E-05 | 0.000396 |
| 206637_at   | P2RY14    | 0.011162 | 0.00198  | 0.012168 |
| 206641_at   | TNFRSF17  | 0.013247 | 0.001505 | 0.009676 |
| 206656_s_at | C20orf3   | 0.004592 | 0.00792  | 0.037115 |
| 206662_at   | GLRX      | -0.009   | 4.58E-06 | 6.66E-05 |
| 206663_at   | SP4       | 0.005373 | 0.009324 | 0.042245 |
| 206666_at   | GZMK      | 0.018662 | 1.77E-07 | 3.77E-06 |
| 206668_s_at | SCAMP1    | -0.00423 | 0.005504 | 0.027847 |
| 206675_s_at | SKIL      | 0.006787 | 0.000347 | 0.002846 |
| 206682_at   | CLEC10A   | 0.00972  | 9.85E-06 | 0.00013  |
| 206686_at   | PDK1      | 0.009615 | 0.002157 | 0.013003 |
| 206687_s_at | PTPN6     | 0.011105 | 8.1E-07  | 1.45E-05 |
| 206692_at   | KCNJ10    | -0.01377 | 0.000242 | 0.002103 |
| 206693_at   | IL7       | 0.009731 | 4.77E-05 | 0.000523 |
| 206695_x_at | ZNF43     | 0.00751  | 3.05E-05 | 0.000353 |
| 206697_s_at | HP        | 0.007905 | 0.003405 | 0.018952 |

|             |         |          |          |          |
|-------------|---------|----------|----------|----------|
| 206704_at   | CLCN5   | -0.01419 | 2.65E-10 | 1.35E-08 |
| 206706_at   | NTF3    | 0.005589 | 0.007517 | 0.035711 |
| 206707_x_at | FAM65B  | 0.01056  | 1.5E-05  | 0.000187 |
| 206708_at   | FOXN2   | 0.009263 | 0.004682 | 0.024536 |
| 206710_s_at | EPB41L3 | -0.01879 | 1.22E-11 | 1.06E-09 |
| 206715_at   | TFEC    | -0.01532 | 1E-05    | 0.000132 |
| 206716_at   | UMOD    | -0.03561 | 1.21E-07 | 2.69E-06 |
| 206717_at   | MYH8    | -0.01652 | 0.008103 | 0.037801 |
| 206726_at   | HPGDS   | 0.023052 | 1.21E-10 | 7.13E-09 |
| 206730_at   | GRIA3   | -0.00952 | 0.001246 | 0.008283 |
| 206742_at   | FIGF    | 0.010833 | 0.000761 | 0.005548 |
| 206746_at   | BFSP1   | 0.008187 | 0.000602 | 0.004569 |
| 206748_s_at | SPAG9   | -0.01042 | 5.97E-05 | 0.000637 |
| 206749_at   | CD1B    | 0.00522  | 0.005692 | 0.028566 |
| 206754_s_at | CYP2B6  | -0.02521 | 7.86E-09 | 2.43E-07 |
| 206755_at   | CYP2B6  | -0.02598 | 6.33E-08 | 1.49E-06 |
| 206756_at   | CHST7   | 0.009812 | 1.88E-05 | 0.00023  |
| 206757_at   | PDE5A   | 0.011439 | 9.94E-05 | 0.000987 |
| 206761_at   | CD96    | 0.006249 | 0.000846 | 0.006066 |
| 206767_at   | RBMS3   | 0.012558 | 5.82E-06 | 8.25E-05 |
| 206770_s_at | SLC35A3 | -0.00873 | 7.72E-05 | 0.000792 |
| 206775_at   | CUBN    | -0.03349 | 3.01E-11 | 2.23E-09 |
| 206785_s_at | KLRC1   | 0.008111 | 0.00522  | 0.02672  |
| 206788_s_at | CBFB    | 0.010457 | 1.37E-08 | 3.95E-07 |
| 206799_at   | SCGB1D2 | -0.00892 | 0.009054 | 0.041272 |
| 206804_at   | CD3G    | 0.016203 | 2.77E-08 | 7.27E-07 |
| 206805_at   | SEMA3A  | 0.007817 | 0.001683 | 0.010626 |
| 206809_s_at | HNRNPA3 | 0.005367 | 1.47E-07 | 3.19E-06 |
| 206818_s_at | CNNM2   | -0.01018 | 0.000103 | 0.00102  |
| 206826_at   | PMP2    | 0.007338 | 0.00602  | 0.029881 |
| 206829_x_at | ZNF430  | 0.004833 | 0.005995 | 0.0298   |
| 206837_at   | ALX1    | 0.012793 | 2.28E-05 | 0.000272 |
| 206840_at   | AFM     | -0.03736 | 1.45E-12 | 1.71E-10 |
| 206846_s_at | HDAC6   | -0.01944 | 3.72E-10 | 1.8E-08  |
| 206856_at   | LILRB5  | 0.006587 | 0.000751 | 0.005487 |
| 206857_s_at | FKBP1B  | 0.009624 | 0.004812 | 0.025113 |
| 206868_at   | STARD8  | -0.00608 | 0.001266 | 0.008373 |
| 206870_at   | PPARA   | -0.01657 | 1.28E-06 | 2.17E-05 |
| 206872_at   | SLC17A1 | -0.02093 | 4.12E-07 | 7.99E-06 |
| 206878_at   | DAO     | -0.03524 | 2.52E-14 | 5.41E-12 |
| 206893_at   | SALL1   | -0.00866 | 0.001265 | 0.008371 |
| 206910_x_at | CFHR2   | 0.008522 | 6.24E-06 | 8.76E-05 |
| 206914_at   | CRTAM   | 0.006651 | 0.003282 | 0.018373 |
| 206925_at   | ST8SIA4 | 0.016221 | 5.76E-10 | 2.54E-08 |
| 206930_at   | GLYAT   | -0.01865 | 1.76E-08 | 4.85E-07 |
| 206932_at   | CH25H   | 0.008669 | 0.000736 | 0.005409 |
| 206946_at   | HCN4    | 0.007962 | 0.000445 | 0.003547 |
| 206950_at   | SCN9A   | -0.01345 | 5.75E-06 | 8.17E-05 |
| 206952_at   | G6PC    | -0.02875 | 5.48E-09 | 1.77E-07 |

|             |            |          |          |          |
|-------------|------------|----------|----------|----------|
| 206955_at   | AQP7       | -0.02123 | 7.33E-09 | 2.29E-07 |
| 206957_at   | AGXT       | -0.02026 | 2.77E-07 | 5.62E-06 |
| 206963_s_at | NAT8       | -0.0261  | 3.38E-07 | 6.72E-06 |
| 206964_at   | NAT8B      | -0.01983 | 4.91E-08 | 1.21E-06 |
| 206974_at   | CXCR6      | 0.011068 | 4.62E-06 | 6.71E-05 |
| 206978_at   | CCR2       | 0.019543 | 1.34E-10 | 7.75E-09 |
| 206983_at   | CCR6       | 0.013767 | 1.45E-08 | 4.14E-07 |
| 206991_s_at | CCR5       | 0.016553 | 3.45E-09 | 1.18E-07 |
| 206993_at   | ATP5S      | -0.00517 | 0.002779 | 0.016017 |
| 207007_at   | NR1I3      | -0.0165  | 1.04E-07 | 2.34E-06 |
| 207008_at   | CXCR2      | 0.007481 | 0.011289 | 0.049216 |
| 207013_s_at | MMP16      | 0.004932 | 0.008605 | 0.039614 |
| 207014_at   | GABRA2     | -0.00811 | 0.000293 | 0.002471 |
| 207015_s_at | ALDH1A2    | 0.010981 | 0.001147 | 0.007746 |
| 207016_s_at | ALDH1A2    | 0.013305 | 0.000219 | 0.001937 |
| 207017_at   | RAB27B     | 0.014813 | 7.57E-11 | 4.77E-09 |
| 207018_s_at | RAB27B     | 0.013169 | 9.11E-09 | 2.75E-07 |
| 207029_at   | KITLG      | 0.012577 | 0.000435 | 0.003472 |
| 207040_s_at | ST13       | -0.00591 | 0.000712 | 0.005261 |
| 207044_at   | THRB       | -0.01113 | 4.51E-08 | 1.12E-06 |
| 207047_s_at | CLCNKA     | -0.01454 | 1.49E-05 | 0.000187 |
| 207049_at   | SCN8A      | -0.01041 | 4.89E-05 | 0.000535 |
| 207050_at   | CACNA2D1   | -0.00764 | 0.00058  | 0.004434 |
| 207051_at   | SLC17A4    | -0.01241 | 0.000344 | 0.002831 |
| 207057_at   | SLC16A7    | -0.01183 | 5.8E-05  | 0.000622 |
| 207058_s_at | PARK2      | -0.00529 | 0.006171 | 0.030442 |
| 207063_at   | NCRNA00185 | -0.01534 | 0.003747 | 0.020477 |
| 207067_s_at | HDC        | 0.009336 | 0.000161 | 0.001493 |
| 207071_s_at | ACO1       | -0.02093 | 9.63E-15 | 2.68E-12 |
| 207075_at   | NLRP3      | 0.008798 | 0.000435 | 0.003472 |
| 207076_s_at | ASS1       | -0.0229  | 5.28E-10 | 2.38E-08 |
| 207081_s_at | PI4KA      | -0.01293 | 1.01E-06 | 1.77E-05 |
| 207085_x_at | CSF2RA     | 0.005809 | 0.001145 | 0.007736 |
| 207087_x_at | ANK1       | 0.004685 | 0.005468 | 0.027701 |
| 207095_at   | SLC10A2    | -0.02226 | 2.31E-07 | 4.78E-06 |
| 207104_x_at | LILRB1     | 0.00499  | 0.010933 | 0.048067 |
| 207121_s_at | MAPK6      | -0.00526 | 0.006108 | 0.030209 |
| 207124_s_at | GNB5       | -0.00904 | 1.19E-05 | 0.000154 |
| 207126_x_at | UGT1A1     | -0.02131 | 1E-10    | 6.11E-09 |
| 207131_x_at | GGT1       | -0.01393 | 6.34E-06 | 8.9E-05  |
| 207132_x_at | PFDN5      | 0.01035  | 0.001144 | 0.007733 |
| 207134_x_at | TPSB2      | 0.020899 | 1.41E-11 | 1.2E-09  |
| 207141_s_at | KCNJ3      | -0.01514 | 2.1E-08  | 5.67E-07 |
| 207142_at   | KCNJ3      | -0.01789 | 1.56E-10 | 8.78E-09 |
| 207172_s_at | CDH11      | 0.010206 | 0.000394 | 0.003182 |
| 207173_x_at | CDH11      | 0.011833 | 0.003102 | 0.017555 |
| 207174_at   | GPC5       | -0.01431 | 0.000345 | 0.002832 |
| 207178_s_at | FRK        | -0.00588 | 0.006055 | 0.030023 |
| 207184_at   | SLC6A13    | -0.01726 | 2.66E-10 | 1.35E-08 |

|             |          |          |          |          |
|-------------|----------|----------|----------|----------|
| 207186_s_at | BPTF     | 0.00567  | 0.003502 | 0.019366 |
| 207191_s_at | ISLR     | 0.012714 | 4.56E-06 | 6.64E-05 |
| 207201_s_at | SLC22A1  | -0.00531 | 0.003438 | 0.019101 |
| 207211_at   | USP2     | -0.02507 | 5.18E-09 | 1.68E-07 |
| 207212_at   | SLC9A3   | -0.0131  | 1.25E-07 | 2.76E-06 |
| 207213_s_at | USP2     | -0.04161 | 1.08E-13 | 1.8E-11  |
| 207223_s_at | ROD1     | 0.0058   | 0.009453 | 0.042698 |
| 207232_s_at | DZIP3    | -0.00623 | 0.002077 | 0.012643 |
| 207237_at   | KCNA3    | 0.011141 | 7.57E-06 | 0.000104 |
| 207238_s_at | PTPRC    | 0.029649 | 4.38E-11 | 2.99E-09 |
| 207243_s_at | CALM2    | 0.003995 | 1.03E-05 | 0.000135 |
| 207249_s_at | SLC28A2  | -0.0076  | 0.007674 | 0.036286 |
| 207275_s_at | ACSL1    | -0.0197  | 4.74E-10 | 2.17E-08 |
| 207277_at   | CD209    | 0.023115 | 1.45E-11 | 1.21E-09 |
| 207279_s_at | NEBL     | -0.00688 | 0.008454 | 0.039076 |
| 207291_at   | PRRG4    | -0.00856 | 0.005801 | 0.02899  |
| 207298_at   | SLC17A3  | -0.01212 | 0.004707 | 0.02465  |
| 207301_at   | EFNA5    | 0.006621 | 0.001002 | 0.00695  |
| 207305_s_at | TRAPPC8  | -0.00537 | 0.005946 | 0.029592 |
| 207315_at   | CD226    | 0.010689 | 2.63E-05 | 0.000309 |
| 207320_x_at | STAU1    | -0.01112 | 3.74E-10 | 1.8E-08  |
| 207332_s_at | TFRC     | -0.01137 | 0.001758 | 0.011017 |
| 207334_s_at | TGFBR2   | 0.011378 | 0.002101 | 0.012735 |
| 207335_x_at | ATP5I    | -0.0039  | 0.000595 | 0.004525 |
| 207339_s_at | LTB      | 0.01989  | 1.43E-11 | 1.2E-09  |
| 207344_at   | AKAP3    | -0.00584 | 0.001998 | 0.012256 |
| 207351_s_at | SH2D2A   | 0.004689 | 0.004429 | 0.023445 |
| 207362_at   | SLC30A4  | -0.01318 | 2.15E-06 | 3.43E-05 |
| 207366_at   | KCNS1    | 0.004295 | 0.005539 | 0.027992 |
| 207375_s_at | IL15RA   | 0.006802 | 0.000552 | 0.004248 |
| 207378_at   | TREH     | -0.0102  | 2.6E-05  | 0.000305 |
| 207385_at   | TFDP3    | 0.006824 | 0.001164 | 0.007841 |
| 207387_s_at | GK       | -0.01909 | 2.79E-10 | 1.4E-08  |
| 207388_s_at | PTGES    | 0.005594 | 0.000221 | 0.001952 |
| 207400_at   | NPY5R    | 0.009024 | 0.000713 | 0.00527  |
| 207407_x_at | CYP4A11  | -0.0259  | 3.24E-12 | 3.34E-10 |
| 207416_s_at | NFATC3   | -0.00539 | 0.000779 | 0.005649 |
| 207419_s_at | RAC2     | 0.00739  | 3.24E-05 | 0.000373 |
| 207429_at   | SLC22A2  | -0.01369 | 3.01E-09 | 1.06E-07 |
| 207444_at   | SLC22A13 | -0.02185 | 2.29E-12 | 2.52E-10 |
| 207446_at   | TLR6     | 0.004983 | 0.006419 | 0.031448 |
| 207453_s_at | DNAJB5   | -0.00701 | 0.010901 | 0.047964 |
| 207456_at   | HNF4G    | -0.01256 | 4.06E-05 | 0.000456 |
| 207480_s_at | MEIS2    | 0.010676 | 2.13E-05 | 0.000257 |
| 207485_x_at | BTN3A1   | 0.007499 | 0.000676 | 0.005042 |
| 207496_at   | MS4A2    | 0.007355 | 0.001723 | 0.010835 |
| 207497_s_at | MS4A2    | 0.016025 | 1.04E-09 | 4.21E-08 |
| 207507_s_at | ATP5G3   | -0.00587 | 0.000362 | 0.002956 |
| 207508_at   | ATP5G3   | -0.00522 | 0.000796 | 0.005766 |



|             |           |          |          |          |
|-------------|-----------|----------|----------|----------|
| 207509_s_at | LAIR2     | 0.011027 | 0.004015 | 0.021667 |
| 207522_s_at | ATP2A3    | 0.009009 | 1.33E-05 | 0.000169 |
| 207524_at   | ST7       | -0.00759 | 0.004968 | 0.025748 |
| 207540_s_at | SYK       | 0.005953 | 0.00532  | 0.027133 |
| 207542_s_at | AQP1      | -0.01607 | 0.000137 | 0.001294 |
| 207543_s_at | P4HA1     | -0.00675 | 0.001097 | 0.007482 |
| 207544_s_at | ADH6      | -0.02587 | 1.55E-09 | 5.95E-08 |
| 207545_s_at | NUMB      | -0.00782 | 0.00015  | 0.001404 |
| 207560_at   | SLC28A1   | -0.01318 | 1.46E-06 | 2.43E-05 |
| 207567_at   | SLC13A2   | -0.02053 | 5.42E-10 | 2.43E-08 |
| 207571_x_at | C1orf38   | 0.015328 | 8.06E-09 | 2.48E-07 |
| 207574_s_at | GADD45B   | -0.00966 | 0.000717 | 0.00529  |
| 207584_at   | LPA       | -0.0084  | 0.000269 | 0.0023   |
| 207594_s_at | SYNJ1     | -0.00777 | 0.000691 | 0.005138 |
| 207595_s_at | BMP1      | 0.005312 | 0.008182 | 0.038115 |
| 207596_at   |           | -0.00976 | 0.000328 | 0.002721 |
| 207610_s_at | EMR2      | 0.010475 | 8.9E-05  | 0.000897 |
| 207613_s_at | CAMK2A    | -0.00642 | 0.0018   | 0.011225 |
| 207616_s_at | TANK      | 0.007259 | 0.006667 | 0.032398 |
| 207624_s_at | RPGR      | 0.006766 | 0.000711 | 0.005256 |
| 207641_at   | TNFRSF13B | 0.007179 | 0.00137  | 0.008965 |
| 207651_at   | GPR171    | 0.019219 | 3.05E-07 | 6.13E-06 |
| 207655_s_at | BLNK      | 0.010579 | 9.06E-05 | 0.000912 |
| 207657_x_at | TNPO1     | -0.00625 | 0.004046 | 0.021787 |
| 207677_s_at | NCF4      | 0.009075 | 0.000454 | 0.0036   |
| 207685_at   | CRYBB3    | -0.00697 | 0.004018 | 0.021675 |
| 207691_x_at | ENTPD1    | 0.005981 | 0.006406 | 0.031411 |
| 207694_at   | POU3F4    | 0.006191 | 0.004828 | 0.025175 |
| 207697_x_at | LILRB2    | 0.009143 | 4.37E-05 | 0.000483 |
| 207698_at   | C6orf123  | -0.01123 | 0.004123 | 0.022125 |
| 207704_s_at | GAS7      | 0.006973 | 5.36E-05 | 0.000578 |
| 207705_s_at | NINL      | -0.01522 | 2.49E-10 | 1.29E-08 |
| 207707_s_at | SEC13     | -0.00891 | 3.07E-07 | 6.16E-06 |
| 207709_at   | PRKAA2    | -0.00889 | 8.04E-08 | 1.87E-06 |
| 207717_s_at | PKP2      | -0.0061  | 0.008611 | 0.039619 |
| 207729_at   | CDH9      | -0.00738 | 6.91E-05 | 0.000718 |
| 207738_s_at | NCKAP1    | -0.00533 | 0.007287 | 0.03488  |
| 207741_x_at | TPSAB1    | 0.023645 | 1.86E-11 | 1.47E-09 |
| 207754_at   | RASSF8    | -0.00821 | 0.002415 | 0.014307 |
| 207761_s_at | METTL7A   | -0.01117 | 1.05E-11 | 9.32E-10 |
| 207764_s_at | HIPK3     | -0.00535 | 0.009324 | 0.042245 |
| 207766_at   | CDKL1     | -0.01304 | 2.14E-05 | 0.000258 |
| 207771_at   | SLC5A2    | -0.01576 | 1.56E-05 | 0.000194 |
| 207776_s_at | CACNB2    | -0.0115  | 0.000929 | 0.006563 |
| 207777_s_at | SP140     | 0.011709 | 7.63E-06 | 0.000105 |
| 207781_s_at | ZNF711    | -0.00829 | 0.008675 | 0.039846 |
| 207800_at   | AKAP5     | 0.006788 | 0.000645 | 0.00485  |
| 207827_x_at | SNCA      | 0.007262 | 0.00013  | 0.001235 |
| 207828_s_at | CENPF     | 0.006517 | 0.010979 | 0.048201 |

|             |         |          |          |          |
|-------------|---------|----------|----------|----------|
| 207837_at   | RBPMS   | -0.00566 | 0.005597 | 0.028211 |
| 207838_x_at | PBXIP1  | 0.00653  | 0.009477 | 0.042788 |
| 207840_at   | CD160   | 0.008686 | 0.000161 | 0.001493 |
| 207843_x_at | CYB5A   | -0.01447 | 2.91E-13 | 4.29E-11 |
| 207847_s_at | MUC1    | 0.019056 | 0.000943 | 0.006634 |
| 207851_s_at | INSR    | -0.0136  | 0.000807 | 0.005839 |
| 207858_s_at | PKLR    | -0.03432 | 2.29E-14 | 4.99E-12 |
| 207861_at   | CCL22   | 0.006025 | 0.001136 | 0.007687 |
| 207871_s_at | ST7     | -0.00773 | 7.19E-05 | 0.000744 |
| 207886_s_at | CALCR   | -0.00725 | 0.002911 | 0.016643 |
| 207889_at   | SARDH   | -0.00748 | 0.007189 | 0.034503 |
| 207892_at   | CD40LG  | 0.007615 | 0.002377 | 0.01411  |
| 207894_s_at | TCL6    | -0.01159 | 6.34E-05 | 0.00067  |
| 207904_s_at | LNPEP   | 0.009267 | 0.000135 | 0.001275 |
| 207922_s_at | MAEA    | -0.00742 | 0.001528 | 0.009783 |
| 207945_s_at | CSNK1D  | -0.00671 | 0.002446 | 0.01445  |
| 207950_s_at | ANK3    | -0.00876 | 0.000117 | 0.001134 |
| 207955_at   | CCL27   | 0.005468 | 0.010693 | 0.047237 |
| 207957_s_at | PRKCB   | 0.013927 | 4.4E-05  | 0.000486 |
| 207958_at   | UGT2A1  | -0.01064 | 0.005661 | 0.028467 |
| 207959_s_at | DNAH9   | 0.006223 | 0.006356 | 0.031223 |
| 207968_s_at | MEF2C   | 0.008586 | 0.000841 | 0.006033 |
| 207981_s_at | ESRRG   | -0.01598 | 7.67E-11 | 4.8E-09  |
| 208002_s_at | ACOT7   | -0.01721 | 3.38E-09 | 1.16E-07 |
| 208006_at   | FOXI1   | -0.00862 | 0.000947 | 0.006648 |
| 208010_s_at | PTPN22  | 0.010637 | 1.29E-05 | 0.000165 |
| 208012_x_at | SP110   | 0.012693 | 3.45E-08 | 8.82E-07 |
| 208018_s_at | HCK     | 0.008364 | 3.22E-05 | 0.000371 |
| 208022_s_at | CDC14B  | -0.00862 | 0.001259 | 0.008339 |
| 208023_at   | TNFRSF4 | -0.0065  | 0.00795  | 0.037227 |
| 208029_s_at | LAPTM4B | 0.008358 | 0.001148 | 0.007754 |
| 208034_s_at | PROZ    | -0.02678 | 8.73E-08 | 2.01E-06 |
| 208039_at   |         | 0.004818 | 0.010144 | 0.045266 |
| 208056_s_at | CBFA2T3 | 0.007799 | 0.000516 | 0.004025 |
| 208068_x_at | CSH1    | 0.004936 | 0.011228 | 0.049015 |
| 208070_s_at | REV3L   | -0.01115 | 0.000202 | 0.001802 |
| 208083_s_at | ITGB6   | 0.028253 | 2.28E-07 | 4.73E-06 |
| 208084_at   | ITGB6   | 0.029312 | 7.44E-07 | 1.34E-05 |
| 208091_s_at | VOPP1   | 0.01108  | 9.81E-06 | 0.00013  |
| 208092_s_at | FAM49A  | 0.013841 | 1.58E-07 | 3.41E-06 |
| 208097_s_at | TMX1    | 0.00433  | 0.005436 | 0.027582 |
| 208116_s_at | MAN1A1  | -0.00521 | 0.007807 | 0.036754 |
| 208130_s_at | TBXAS1  | 0.006503 | 0.001001 | 0.006942 |
| 208131_s_at | PTGIS   | 0.008822 | 0.002767 | 0.015968 |
| 208146_s_at | CPVL    | 0.010534 | 0.002249 | 0.013481 |
| 208158_s_at | OSBPL1A | -0.00824 | 0.000676 | 0.005042 |
| 208161_s_at | ABCC3   | 0.010874 | 0.004201 | 0.022502 |
| 208172_s_at | KCNB2   | 0.004667 | 0.006496 | 0.031747 |
| 208177_at   | SLC34A1 | -0.03588 | 4.39E-14 | 8.44E-12 |

|             |          |          |          |          |
|-------------|----------|----------|----------|----------|
| 208184_s_at | TRAPPC10 | -0.0086  | 7.43E-05 | 0.000767 |
| 208189_s_at | MYO7A    | -0.00959 | 1.25E-05 | 0.00016  |
| 208206_s_at | RASGRP2  | 0.004667 | 0.008966 | 0.040957 |
| 208228_s_at | FGFR2    | -0.00745 | 0.000835 | 0.005997 |
| 208229_at   | FGFR2    | -0.00941 | 0.006715 | 0.032578 |
| 208230_s_at | NRG1     | -0.00639 | 0.003673 | 0.020156 |
| 208244_at   | BMP3     | 0.010991 | 1.21E-05 | 0.000155 |
| 208248_x_at | APLP2    | -0.0029  | 0.004876 | 0.025362 |
| 208250_s_at | DMBT1    | -0.00425 | 0.011114 | 0.048679 |
| 208252_s_at | CHST3    | -0.0052  | 0.004783 | 0.024988 |
| 208283_at   | GAGE1    | 0.006781 | 0.007728 | 0.03649  |
| 208284_x_at | GGT1     | -0.01556 | 4.51E-07 | 8.68E-06 |
| 208296_x_at | TNFAIP8  | 0.015894 | 1.59E-09 | 6.07E-08 |
| 208306_x_at | HLA-DRB1 | 0.010921 | 0.001277 | 0.008436 |
| 208315_x_at | TRAF3    | 0.00437  | 0.005147 | 0.026461 |
| 208318_s_at | XYLB     | -0.02523 | 2.28E-08 | 6.13E-07 |
| 208319_s_at | RBM3     | 0.005329 | 0.006089 | 0.030152 |
| 208321_s_at | CABP1    | -0.00764 | 0.000744 | 0.005449 |
| 208322_s_at | ST3GAL1  | -0.01485 | 2.34E-06 | 3.69E-05 |
| 208323_s_at | ANXA13   | -0.01256 | 0.007629 | 0.036135 |
| 208325_s_at | AKAP13   | 0.005078 | 0.007528 | 0.035749 |
| 208335_s_at | DARC     | 0.010198 | 0.000156 | 0.001452 |
| 208336_s_at | TECR     | -0.00885 | 0.008579 | 0.039528 |
| 208354_s_at | SLC12A3  | -0.02372 | 2.05E-05 | 0.000249 |
| 208367_x_at | CYP3A4   | -0.01168 | 1.59E-07 | 3.42E-06 |
| 208369_s_at | GCDH     | -0.02084 | 1.33E-11 | 1.15E-09 |
| 208383_s_at | PCK1     | -0.01883 | 5.92E-08 | 1.41E-06 |
| 208392_x_at | SP110    | 0.005071 | 0.000455 | 0.003606 |
| 208394_x_at | ESM1     | -0.00947 | 9.18E-05 | 0.000922 |
| 208396_s_at | PDE1A    | 0.007655 | 0.007977 | 0.037334 |
| 208398_s_at | TBPL1    | 0.005148 | 0.005261 | 0.026892 |
| 208405_s_at | CD164    | -0.00544 | 0.004682 | 0.024536 |
| 208414_s_at | HOXB3    | 0.005286 | 0.008505 | 0.039253 |
| 208420_x_at | SUPT6H   | -0.00701 | 0.003847 | 0.020899 |
| 208422_at   | MSR1     | 0.010799 | 0.00042  | 0.003368 |
| 208423_s_at | MSR1     | 0.019984 | 1.41E-09 | 5.46E-08 |
| 208429_x_at | HNF4A    | -0.01979 | 2.55E-06 | 3.97E-05 |
| 208434_at   | MECOM    | 0.005306 | 0.002644 | 0.015397 |
| 208436_s_at | IRF7     | 0.007434 | 0.000683 | 0.005085 |
| 208438_s_at | FGR      | 0.009674 | 4.04E-05 | 0.000453 |
| 208442_s_at | ATM      | 0.005984 | 0.006247 | 0.030753 |
| 208446_s_at | ZFYVE9   | -0.00865 | 0.000479 | 0.003774 |
| 208449_s_at | FGF8     | 0.005981 | 0.000413 | 0.003321 |
| 208450_at   | LGALS2   | -0.0119  | 0.000111 | 0.001079 |
| 208451_s_at | C4A      | -0.01498 | 0.002316 | 0.013793 |
| 208456_s_at | RRAS2    | -0.00766 | 0.000154 | 0.001437 |
| 208466_at   | RAB3D    | 0.004298 | 0.011253 | 0.049086 |
| 208473_s_at | GP2      | -0.00735 | 0.007469 | 0.035561 |
| 208480_s_at | ABCC6    | -0.00412 | 0.003757 | 0.020525 |

|             |           |          |          |          |
|-------------|-----------|----------|----------|----------|
| 208484_at   | HIST1H1A  | 0.00852  | 0.00312  | 0.017617 |
| 208490_x_at | HIST1H2BF | 0.012448 | 0.003516 | 0.019429 |
| 208492_at   | RFXAP     | 0.005963 | 0.007811 | 0.036758 |
| 208510_s_at | PPARG     | -0.00481 | 0.00783  | 0.036805 |
| 208514_at   | KCNE1     | -0.00721 | 0.007465 | 0.035549 |
| 208523_x_at | HIST1H2BI | 0.009203 | 0.005725 | 0.028673 |
| 208527_x_at | HIST1H2BE | 0.009898 | 0.005568 | 0.028103 |
| 208530_s_at | RARB      | 0.007115 | 0.002103 | 0.012745 |
| 208540_x_at | S100A11   | 0.009029 | 1.25E-06 | 2.12E-05 |
| 208549_x_at | PTMA      | 0.005065 | 6.24E-05 | 0.000661 |
| 208553_at   | HIST1H1E  | 0.012509 | 0.00895  | 0.040905 |
| 208561_at   | ABCC9     | 0.019649 | 4.06E-06 | 6.02E-05 |
| 208562_s_at | ABCC9     | 0.010164 | 0.000231 | 0.002021 |
| 208569_at   | HIST1H2AB | 0.008146 | 0.000555 | 0.004268 |
| 208576_s_at | HIST1H3B  | 0.005278 | 0.009953 | 0.04454  |
| 208579_x_at | H2BFS     | 0.012484 | 0.000559 | 0.004295 |
| 208581_x_at | MT1X      | -0.01211 | 0.001826 | 0.011359 |
| 208583_x_at | HIST1H2AJ | 0.011341 | 0.001564 | 0.009988 |
| 208589_at   | TRPC7     | -0.00907 | 0.00055  | 0.004239 |
| 208592_s_at | CD1E      | 0.007385 | 0.002537 | 0.014867 |
| 208596_s_at | UGT1A1    | -0.02254 | 6.99E-10 | 3.01E-08 |
| 208607_s_at | SAA1      | 0.012985 | 3.46E-07 | 6.83E-06 |
| 208616_s_at | PTP4A2    | 0.003364 | 0.002804 | 0.016137 |
| 208630_at   | HADHA     | -0.00809 | 0.000176 | 0.001604 |
| 208636_at   | ACTN1     | 0.014075 | 2.41E-06 | 3.79E-05 |
| 208637_x_at | ACTN1     | 0.011849 | 0.000357 | 0.002925 |
| 208640_at   | RAC1      | 0.004043 | 0.000627 | 0.004729 |
| 208646_at   | RPS14P3   | 0.006313 | 0.004274 | 0.022801 |
| 208647_at   | FDFT1     | -0.00574 | 0.000949 | 0.006663 |
| 208650_s_at | CD24      | 0.00988  | 4.28E-05 | 0.000474 |
| 208651_x_at | CD24      | 0.007531 | 7.87E-05 | 0.000805 |
| 208653_s_at | CD164     | -0.00867 | 5.26E-05 | 0.000569 |
| 208654_s_at | CD164     | -0.00437 | 0.004337 | 0.023072 |
| 208655_at   | CCNI      | 0.002621 | 0.003234 | 0.018153 |
| 208659_at   | CLIC1     | 0.009834 | 1.27E-05 | 0.000162 |
| 208660_at   | CS        | -0.00508 | 0.000635 | 0.004786 |
| 208666_s_at | ST13      | -0.00658 | 9.4E-06  | 0.000125 |
| 208667_s_at | ST13      | -0.00899 | 1.7E-06  | 2.77E-05 |
| 208668_x_at | HMG2      | 0.005042 | 0.005404 | 0.027471 |
| 208672_s_at | SRSF3     | 0.004025 | 0.003304 | 0.018475 |
| 208678_at   | ATP6V1E1  | -0.00714 | 5.65E-10 | 2.52E-08 |
| 208687_x_at | HSPA8     | -0.00551 | 3.63E-05 | 0.000412 |
| 208690_s_at | PDLIM1    | 0.017992 | 7.9E-11  | 4.92E-09 |
| 208691_at   | TFRC      | -0.01    | 0.001038 | 0.007162 |
| 208692_at   | RPS3      | 0.009726 | 0.000569 | 0.004362 |
| 208695_s_at | RPL39     | 0.006925 | 0.000323 | 0.002683 |
| 208704_x_at | APLP2     | -0.00387 | 0.000763 | 0.005557 |
| 208705_s_at | EIF5      | -0.00758 | 2.27E-05 | 0.000272 |
| 208706_s_at | EIF5      | -0.00475 | 0.000117 | 0.001133 |

|             |          |          |          |          |
|-------------|----------|----------|----------|----------|
| 208707_at   | EIF5     | -0.01388 | 9.5E-10  | 3.93E-08 |
| 208708_x_at | EIF5     | -0.00535 | 7.97E-06 | 0.000108 |
| 208710_s_at | AP3D1    | -0.00631 | 0.005722 | 0.028665 |
| 208711_s_at | CCND1    | -0.00682 | 0.006303 | 0.030996 |
| 208712_at   | CCND1    | -0.00883 | 0.000117 | 0.001131 |
| 208713_at   | HNRNPUL1 | 0.00498  | 0.000209 | 0.001856 |
| 208715_at   | TMCO1    | -0.00505 | 0.002267 | 0.013576 |
| 208717_at   | OXA1L    | -0.00618 | 0.002455 | 0.014497 |
| 208720_s_at | RBM39    | 0.003282 | 0.004939 | 0.025621 |
| 208724_s_at | RAB1A    | -0.00361 | 0.002672 | 0.015528 |
| 208729_x_at | HLA-B    | 0.015844 | 6.31E-05 | 0.000667 |
| 208732_at   | RAB2A    | -0.00637 | 0.001397 | 0.009093 |
| 208736_at   | ARPC3    | 0.005296 | 0.002895 | 0.016571 |
| 208739_x_at | SUMO2    | 0.005243 | 0.000175 | 0.0016   |
| 208741_at   | SAP18    | -0.00672 | 0.004305 | 0.022932 |
| 208745_at   | ATP5L    | -0.00487 | 0.003865 | 0.020971 |
| 208747_s_at | C1S      | 0.023878 | 7.18E-11 | 4.58E-09 |
| 208752_x_at | NAP1L1   | 0.007922 | 1.15E-06 | 1.98E-05 |
| 208753_s_at | NAP1L1   | 0.006423 | 0.004874 | 0.025356 |
| 208754_s_at | NAP1L1   | 0.009224 | 6.61E-05 | 0.000692 |
| 208755_x_at | H3F3A    | 0.010298 | 0.004585 | 0.024136 |
| 208766_s_at | HNRNPR   | 0.004501 | 0.002703 | 0.015663 |
| 208767_s_at | LAPTM4B  | 0.006279 | 0.011377 | 0.049482 |
| 208769_at   | EIF4EBP2 | -0.01258 | 0.00106  | 0.007272 |
| 208770_s_at | EIF4EBP2 | -0.00694 | 5.75E-07 | 1.07E-05 |
| 208772_at   | ANKHD1   | -0.00567 | 0.004368 | 0.023189 |
| 208776_at   | PSMD11   | -0.00732 | 0.002497 | 0.014687 |
| 208777_s_at | PSMD11   | -0.00588 | 0.000816 | 0.005889 |
| 208779_x_at | DDR1     | 0.005441 | 0.004243 | 0.022669 |
| 208782_at   | FSTL1    | 0.01178  | 1.5E-05  | 0.000187 |
| 208787_at   | MRPL3    | -0.00351 | 0.005294 | 0.02703  |
| 208788_at   | ELOVL5   | -0.00834 | 0.00118  | 0.007924 |
| 208789_at   | PTRF     | 0.011354 | 3.31E-05 | 0.000381 |
| 208790_s_at | PTRF     | 0.010617 | 0.000127 | 0.001216 |
| 208791_at   | CLU      | 0.018291 | 3.64E-05 | 0.000414 |
| 208792_s_at | CLU      | 0.015113 | 9.6E-05  | 0.000957 |
| 208796_s_at | CCNG1    | -0.00604 | 0.000275 | 0.002343 |
| 208797_s_at | GOLGA8A  | 0.008433 | 0.006676 | 0.032436 |
| 208803_s_at | SRP72    | 0.005011 | 0.007749 | 0.036575 |
| 208804_s_at | SRSF6    | -0.00796 | 4.43E-06 | 6.48E-05 |
| 208807_s_at | CHD3     | 0.006542 | 4.31E-05 | 0.000477 |
| 208808_s_at | HMGB2    | 0.010844 | 7.46E-07 | 1.35E-05 |
| 208810_at   | DNAJB6   | -0.00646 | 0.000318 | 0.002642 |
| 208812_x_at | HLA-C    | 0.008148 | 0.005937 | 0.029568 |
| 208813_at   | GOT1     | -0.01373 | 2.92E-09 | 1.04E-07 |
| 208814_at   | HSPA4    | -0.00773 | 0.00179  | 0.01118  |
| 208816_x_at | ANXA2P2  | 0.013344 | 1.17E-10 | 6.92E-09 |
| 208825_x_at | RPL23A   | 0.003183 | 0.00295  | 0.016822 |
| 208827_at   | PSMB6    | -0.00638 | 0.00918  | 0.04175  |

|             |           |          |          |          |
|-------------|-----------|----------|----------|----------|
| 208829_at   | TAPBP     | 0.010475 | 0.001006 | 0.006972 |
| 208830_s_at | SUPT6H    | -0.00737 | 0.000982 | 0.006847 |
| 208834_x_at | RPL23A    | 0.003138 | 0.003499 | 0.019354 |
| 208837_at   | TMED3     | 0.00653  | 0.007184 | 0.034498 |
| 208840_s_at | G3BP2     | -0.00772 | 1.05E-05 | 0.000137 |
| 208847_s_at | ADH5      | -0.00786 | 1.5E-06  | 2.48E-05 |
| 208848_at   | ADH5      | -0.00701 | 0.001311 | 0.008639 |
| 208849_at   |           | 0.005919 | 0.006708 | 0.032563 |
| 208850_s_at | THY1      | -0.01744 | 5.89E-05 | 0.000629 |
| 208851_s_at | THY1      | -0.02333 | 9E-09    | 2.73E-07 |
| 208856_x_at | RPLP0     | 0.009103 | 0.008598 | 0.039599 |
| 208864_s_at | TXN       | -0.00791 | 1.71E-06 | 2.78E-05 |
| 208868_s_at | GABARAPL1 | -0.00868 | 1.51E-06 | 2.5E-05  |
| 208869_s_at | GABARAPL1 | -0.00627 | 6.61E-06 | 9.23E-05 |
| 208870_x_at | ATP5C1    | -0.00627 | 7.76E-05 | 0.000796 |
| 208876_s_at | PAK2      | 0.00532  | 0.007493 | 0.035637 |
| 208879_x_at | PRPF6     | 0.004213 | 0.010693 | 0.047237 |
| 208881_x_at | IDI1      | -0.00689 | 1.16E-06 | 1.99E-05 |
| 208885_at   | LCP1      | 0.02529  | 1.12E-12 | 1.39E-10 |
| 208894_at   | HLA-DRA   | 0.02189  | 1.03E-05 | 0.000135 |
| 208898_at   | ATP6V1D   | -0.00855 | 8.13E-05 | 0.000827 |
| 208899_x_at | ATP6V1D   | -0.00497 | 0.00467  | 0.024506 |
| 208901_s_at | TOP1      | -0.00385 | 0.000925 | 0.006538 |
| 208905_at   | CYCS      | -0.00523 | 0.000704 | 0.005219 |
| 208909_at   | UQCRCFS1  | -0.00931 | 7.18E-07 | 1.3E-05  |
| 208910_s_at | C1QBP     | -0.00821 | 7.68E-06 | 0.000105 |
| 208913_at   | GGA2      | -0.00483 | 0.005172 | 0.026546 |
| 208914_at   | GGA2      | -0.01269 | 5.02E-06 | 7.21E-05 |
| 208915_s_at | GGA2      | -0.00742 | 0.004423 | 0.023427 |
| 208921_s_at | SRI       | 0.008608 | 4.87E-05 | 0.000533 |
| 208929_x_at | RPL13     | 0.007    | 0.004464 | 0.023615 |
| 208941_s_at | SEPHS1    | -0.0066  | 0.005108 | 0.026322 |
| 208943_s_at | SEC62     | -0.00391 | 0.001417 | 0.009193 |
| 208944_at   | TGFBR2    | 0.008602 | 0.00037  | 0.003013 |
| 208948_s_at | STAU1     | -0.01302 | 2.19E-10 | 1.16E-08 |
| 208949_s_at | LGALS3    | 0.007359 | 0.005492 | 0.027807 |
| 208950_s_at | ALDH7A1   | -0.0162  | 1.59E-09 | 6.07E-08 |
| 208951_at   | ALDH7A1   | -0.01656 | 1.4E-06  | 2.33E-05 |
| 208954_s_at | LARP4B    | -0.00617 | 0.000315 | 0.002629 |
| 208958_at   | ERP44     | -0.00551 | 0.00953  | 0.042978 |
| 208965_s_at | IFI16     | 0.02655  | 4.42E-15 | 1.49E-12 |
| 208966_x_at | IFI16     | 0.025975 | 1.32E-14 | 3.39E-12 |
| 208969_at   | NDUFA9    | -0.00767 | 1.07E-05 | 0.00014  |
| 208972_s_at | ATP5G1    | -0.00767 | 0.00294  | 0.016779 |
| 208973_at   | ERI3      | -0.0062  | 0.010554 | 0.046771 |
| 208978_at   | CRIP2     | 0.007205 | 0.001033 | 0.007131 |
| 208981_at   | PECAM1    | 0.009209 | 0.000214 | 0.001889 |
| 208982_at   | PECAM1    | 0.009774 | 0.001353 | 0.008867 |
| 208996_s_at | POLR2C    | -0.00631 | 0.00227  | 0.013587 |

|             |          |          |          |          |
|-------------|----------|----------|----------|----------|
| 208997_s_at | UCP2     | 0.022541 | 2.92E-09 | 1.04E-07 |
| 208998_at   | UCP2     | 0.018985 | 1.52E-08 | 4.32E-07 |
| 209001_s_at | ANAPC13  | -0.00648 | 6.58E-05 | 0.00069  |
| 209003_at   | SLC25A11 | -0.01186 | 6.83E-08 | 1.6E-06  |
| 209004_s_at | FBXL5    | -0.00887 | 3.41E-06 | 5.14E-05 |
| 209005_at   | FBXL5    | -0.01273 | 2.71E-07 | 5.52E-06 |
| 209016_s_at | KRT7     | 0.015081 | 0.000908 | 0.006448 |
| 209017_s_at | LONP1    | -0.00823 | 0.001711 | 0.010777 |
| 209018_s_at | PINK1    | -0.00751 | 0.00912  | 0.041557 |
| 209019_s_at | PINK1    | -0.0096  | 5.06E-05 | 0.000551 |
| 209034_at   | PNRC1    | 0.004575 | 0.000987 | 0.006872 |
| 209035_at   | MDK      | 0.007858 | 0.000111 | 0.00108  |
| 209036_s_at | MDH2     | -0.00884 | 1.66E-06 | 2.7E-05  |
| 209037_s_at | EHD1     | -0.0059  | 0.010785 | 0.047558 |
| 209038_s_at | EHD1     | -0.00476 | 0.002312 | 0.013773 |
| 209040_s_at | PSMB8    | 0.012465 | 1.48E-05 | 0.000186 |
| 209044_x_at | SF3B4    | -0.00472 | 0.010568 | 0.04681  |
| 209047_at   | AQP1     | -0.01246 | 0.000326 | 0.002698 |
| 209051_s_at | RALGDS   | 0.006868 | 0.000145 | 0.001361 |
| 209060_x_at | NCOA3    | 0.008172 | 0.002675 | 0.01554  |
| 209061_at   | NCOA3    | 0.006322 | 7.36E-05 | 0.00076  |
| 209065_at   | UQCRB    | -0.00908 | 0.00014  | 0.001318 |
| 209073_s_at | NUMB     | -0.00539 | 0.001154 | 0.007786 |
| 209075_s_at | ISCU     | -0.004   | 0.00621  | 0.030606 |
| 209076_s_at | WDR45L   | -0.00576 | 0.000426 | 0.003413 |
| 209077_at   | TXN2     | -0.00882 | 0.000262 | 0.002251 |
| 209083_at   | CORO1A   | 0.020283 | 2.03E-11 | 1.58E-09 |
| 209092_s_at | GLOD4    | -0.00546 | 2.18E-05 | 0.000261 |
| 209094_at   | DDAH1    | -0.00854 | 6.28E-10 | 2.75E-08 |
| 209095_at   | DLD      | -0.00897 | 6.22E-06 | 8.74E-05 |
| 209111_at   | RNF5     | -0.00775 | 1.09E-05 | 0.000141 |
| 209112_at   | CDKN1B   | 0.00693  | 0.002328 | 0.013857 |
| 209118_s_at | TUBA1A   | 0.014024 | 2.36E-07 | 4.87E-06 |
| 209120_at   | NR2F2    | 0.00854  | 1.24E-08 | 3.61E-07 |
| 209122_at   | PLIN2    | -0.01754 | 2.55E-08 | 6.75E-07 |
| 209123_at   | QDPR     | -0.02635 | 6.84E-17 | 7.32E-14 |
| 209138_x_at | IGL@     | 0.042518 | 3.48E-09 | 1.18E-07 |
| 209140_x_at | HLA-B    | 0.012731 | 0.000131 | 0.001242 |
| 209146_at   | SC4MOL   | -0.00763 | 1.29E-06 | 2.17E-05 |
| 209150_s_at | TM9SF1   | -0.00515 | 0.008818 | 0.040402 |
| 209160_at   | AKR1C3   | -0.01417 | 3.55E-06 | 5.32E-05 |
| 209161_at   | PRPF4    | -0.01068 | 1.08E-05 | 0.00014  |
| 209166_s_at | MAN2B1   | 0.004419 | 0.00325  | 0.018217 |
| 209167_at   | GPM6B    | 0.018861 | 5.53E-06 | 7.89E-05 |
| 209168_at   | GPM6B    | 0.01327  | 1.56E-06 | 2.57E-05 |
| 209169_at   | GPM6B    | 0.011211 | 8.5E-06  | 0.000114 |
| 209170_s_at | GPM6B    | 0.01772  | 2.54E-07 | 5.19E-06 |
| 209173_at   | AGR2     | 0.044505 | 3.45E-21 | 3.84E-17 |
| 209177_at   | NDUFAF3  | -0.00516 | 0.006595 | 0.032114 |

|             |          |          |          |          |
|-------------|----------|----------|----------|----------|
| 209180_at   | RABGGTB  | -0.00635 | 0.000422 | 0.003382 |
| 209181_s_at | RABGGTB  | -0.00505 | 0.005795 | 0.02897  |
| 209183_s_at | C10orf10 | 0.016185 | 0.000188 | 0.001691 |
| 209191_at   | TUBB6    | 0.019198 | 1.7E-07  | 3.63E-06 |
| 209198_s_at | SYT11    | 0.015688 | 4.57E-06 | 6.65E-05 |
| 209199_s_at | MEF2C    | 0.009606 | 5.09E-05 | 0.000554 |
| 209200_at   | MEF2C    | 0.011949 | 0.000165 | 0.001524 |
| 209201_x_at | CXCR4    | 0.028255 | 3.05E-09 | 1.07E-07 |
| 209204_at   | LMO4     | 0.006367 | 0.004353 | 0.02314  |
| 209205_s_at | LMO4     | 0.010507 | 2E-07    | 4.21E-06 |
| 209211_at   | KLF5     | 0.008201 | 0.002003 | 0.012276 |
| 209212_s_at | KLF5     | 0.010616 | 0.002505 | 0.014719 |
| 209213_at   | CBR1     | -0.00613 | 0.000432 | 0.003455 |
| 209222_s_at | OSBPL2   | -0.00599 | 0.000103 | 0.001016 |
| 209227_at   | TUSC3    | 0.008708 | 0.004001 | 0.021615 |
| 209234_at   | KIF1B    | -0.01046 | 2.09E-08 | 5.66E-07 |
| 209238_at   | STX3     | -0.00887 | 0.001011 | 0.006999 |
| 209241_x_at | MINK1    | -0.00528 | 0.003059 | 0.01735  |
| 209244_s_at | KIF1C    | -0.00699 | 0.001229 | 0.008197 |
| 209248_at   | GHITM    | -0.00696 | 8.71E-09 | 2.65E-07 |
| 209249_s_at | GHITM    | -0.01166 | 3.89E-11 | 2.73E-09 |
| 209251_x_at | TUBA1C   | 0.005911 | 0.009155 | 0.041682 |
| 209254_at   | KLHDC10  | -0.0076  | 4.95E-05 | 0.000541 |
| 209256_s_at | KLHDC10  | -0.00968 | 0.007059 | 0.033989 |
| 209262_s_at | NR2F6    | -0.00622 | 0.002013 | 0.012312 |
| 209269_s_at | SYK      | 0.005807 | 0.002787 | 0.01605  |
| 209273_s_at | ISCA1    | -0.00663 | 3.08E-05 | 0.000356 |
| 209274_s_at | ISCA1    | -0.00546 | 0.010879 | 0.047879 |
| 209276_s_at | GLRX     | -0.00856 | 0.000284 | 0.002406 |
| 209277_at   | TFPI2    | 0.010816 | 0.001152 | 0.007779 |
| 209278_s_at | TFPI2    | 0.021815 | 5.08E-07 | 9.63E-06 |
| 209286_at   | CDC42EP3 | 0.008991 | 0.002608 | 0.015231 |
| 209287_s_at | CDC42EP3 | 0.008012 | 0.001119 | 0.007602 |
| 209288_s_at | CDC42EP3 | 0.00711  | 0.002009 | 0.012296 |
| 209289_at   | NFIB     | -0.00862 | 3.21E-05 | 0.00037  |
| 209290_s_at | NFIB     | -0.0056  | 0.000255 | 0.0022   |
| 209291_at   | ID4      | 0.006551 | 0.002126 | 0.012855 |
| 209296_at   | PPM1B    | -0.00495 | 0.007829 | 0.036805 |
| 209300_s_at | NECAP1   | -0.00805 | 0.000885 | 0.006317 |
| 209301_at   | CA2      | -0.0177  | 4.31E-10 | 2.01E-08 |
| 209306_s_at | SWAP70   | 0.005307 | 0.006507 | 0.031781 |
| 209307_at   | SWAP70   | 0.006863 | 0.003391 | 0.018892 |
| 209308_s_at | BNIP2    | 0.007313 | 0.001175 | 0.007901 |
| 209309_at   | AZGP1    | -0.03182 | 1.19E-10 | 7.03E-09 |
| 209310_s_at | CASP4    | 0.011876 | 4.86E-07 | 9.27E-06 |
| 209311_at   | BCL2L2   | -0.00891 | 0.000213 | 0.001888 |
| 209312_x_at | HLA-DRB1 | 0.016662 | 0.001183 | 0.007947 |
| 209317_at   | POLR1C   | -0.00391 | 0.011401 | 0.049565 |
| 209324_s_at | RGS16    | 0.016103 | 4.68E-06 | 6.77E-05 |



|             |          |          |          |          |
|-------------|----------|----------|----------|----------|
| 209325_s_at | RGS16    | 0.010209 | 0.000125 | 0.001201 |
| 209334_s_at | PSMD9    | -0.01276 | 1.13E-05 | 0.000146 |
| 209335_at   | DCN      | 0.016631 | 0.000151 | 0.001408 |
| 209340_at   | UAP1     | -0.01251 | 6.11E-07 | 1.13E-05 |
| 209343_at   | EFHD1    | -0.00637 | 0.004645 | 0.024404 |
| 209344_at   | TPM4     | 0.012665 | 0.000531 | 0.004126 |
| 209346_s_at | PI4K2A   | -0.00537 | 0.010203 | 0.045484 |
| 209348_s_at | MAF      | -0.01122 | 4.13E-05 | 0.000461 |
| 209355_s_at | PPAP2B   | -0.0128  | 0.000917 | 0.006492 |
| 209356_x_at | EFEMP2   | 0.007576 | 0.001415 | 0.009189 |
| 209360_s_at | RUNX1    | 0.01251  | 1.39E-07 | 3.04E-06 |
| 209363_s_at | MED21    | -0.00526 | 0.001846 | 0.011462 |
| 209366_x_at | CYB5A    | -0.01675 | 4.81E-14 | 9.01E-12 |
| 209368_at   | EPHX2    | -0.02182 | 1.87E-09 | 7.06E-08 |
| 209369_at   | ANXA3    | 0.015424 | 1.26E-06 | 2.13E-05 |
| 209371_s_at | SH3BP2   | -0.01507 | 4.21E-05 | 0.000468 |
| 209374_s_at | IGHM     | 0.039068 | 3.76E-15 | 1.31E-12 |
| 209375_at   | XPC      | -0.00641 | 0.002754 | 0.015904 |
| 209384_at   | PROSC    | -0.00901 | 3.43E-05 | 0.000393 |
| 209385_s_at | PROSC    | -0.01079 | 7.16E-05 | 0.000742 |
| 209386_at   | TM4SF1   | 0.012495 | 2.15E-05 | 0.000258 |
| 209387_s_at | TM4SF1   | 0.009739 | 0.000116 | 0.001123 |
| 209390_at   | TSC1     | -0.00689 | 0.000106 | 0.001039 |
| 209392_at   | ENPP2    | -0.01549 | 6.18E-06 | 8.69E-05 |
| 209395_at   | CHI3L1   | -0.01728 | 3.28E-05 | 0.000378 |
| 209396_s_at | CHI3L1   | -0.01479 | 1.54E-05 | 0.000192 |
| 209406_at   | BAG2     | -0.00605 | 0.004544 | 0.023971 |
| 209409_at   | GRB10    | -0.01382 | 1.02E-07 | 2.3E-06  |
| 209410_s_at | GRB10    | -0.01295 | 6.74E-06 | 9.38E-05 |
| 209420_s_at | SMPD1    | -0.00907 | 0.000292 | 0.002465 |
| 209425_at   | AMACR    | -0.00911 | 0.010741 | 0.04741  |
| 209426_s_at | AMACR    | -0.00741 | 0.002536 | 0.014865 |
| 209435_s_at | ARHGEF2  | 0.012582 | 1.36E-06 | 2.27E-05 |
| 209436_at   | SPON1    | 0.013939 | 0.000165 | 0.001521 |
| 209437_s_at | SPON1    | 0.011988 | 0.000112 | 0.001087 |
| 209439_s_at | PHKA2    | -0.0054  | 0.002643 | 0.015397 |
| 209442_x_at | ANK3     | -0.00831 | 3.47E-05 | 0.000396 |
| 209443_at   | SERPINA5 | -0.01689 | 7.64E-07 | 1.38E-05 |
| 209450_at   | OSGEP    | 0.005117 | 0.00956  | 0.043087 |
| 209458_x_at | HBA1     | 0.015865 | 0.010502 | 0.046575 |
| 209459_s_at | ABAT     | -0.03071 | 6.21E-17 | 7.32E-14 |
| 209460_at   | ABAT     | -0.03251 | 2.52E-20 | 1.33E-16 |
| 209465_x_at | PTN      | 0.015507 | 1.89E-06 | 3.05E-05 |
| 209466_x_at | PTN      | 0.017968 | 3.6E-05  | 0.00041  |
| 209468_at   | LRP5     | -0.01043 | 0.000104 | 0.001023 |
| 209473_at   | ENTPD1   | 0.006577 | 0.000134 | 0.001271 |
| 209485_s_at | OSBPL1A  | -0.00729 | 0.003446 | 0.019136 |
| 209492_x_at | ATP5I    | -0.00377 | 7.47E-06 | 0.000103 |
| 209493_at   | PDZD2    | -0.02133 | 2.13E-10 | 1.13E-08 |

|             |          |          |          |          |
|-------------|----------|----------|----------|----------|
| 209498_at   | CEACAM1  | -0.01085 | 0.000193 | 0.001732 |
| 209503_s_at | PSMC5    | -0.00587 | 0.002557 | 0.014975 |
| 209510_at   | RNF139   | 0.005504 | 0.004558 | 0.024017 |
| 209512_at   | HSDL2    | -0.01077 | 6.36E-05 | 0.000671 |
| 209513_s_at | HSDL2    | -0.01128 | 7.73E-09 | 2.4E-07  |
| 209514_s_at | RAB27A   | 0.017128 | 1.16E-08 | 3.4E-07  |
| 209515_s_at | RAB27A   | 0.012967 | 6.78E-07 | 1.24E-05 |
| 209521_s_at | AMOT     | -0.00593 | 0.003357 | 0.018731 |
| 209522_s_at | CRAT     | -0.01891 | 2.21E-11 | 1.69E-09 |
| 209526_s_at | HDGFRP3  | 0.006349 | 0.005427 | 0.027557 |
| 209529_at   | PPAP2C   | 0.005264 | 0.008002 | 0.037433 |
| 209531_at   | GSTZ1    | -0.00923 | 4.54E-05 | 0.0005   |
| 209539_at   | ARHGEF6  | 0.015224 | 1.45E-05 | 0.000182 |
| 209540_at   | IGF1     | 0.010546 | 0.007408 | 0.035325 |
| 209546_s_at | APOL1    | 0.011978 | 2.39E-05 | 0.000283 |
| 209549_s_at | DGUOK    | 0.005177 | 0.004031 | 0.021734 |
| 209550_at   | NDN      | 0.012567 | 1.14E-11 | 1E-09    |
| 209555_s_at | CD36     | 0.007049 | 0.004885 | 0.025385 |
| 209563_x_at | CALM1    | -0.00612 | 9.56E-09 | 2.87E-07 |
| 209568_s_at | RGL1     | -0.00799 | 0.000178 | 0.001621 |
| 209571_at   | CIR1     | 0.006652 | 0.000186 | 0.001684 |
| 209572_s_at | EED      | 0.005812 | 0.001041 | 0.007174 |
| 209574_s_at | C18orf1  | 0.010849 | 0.002816 | 0.016179 |
| 209576_at   | GNAI1    | 0.016051 | 1.19E-08 | 3.46E-07 |
| 209577_at   | PCYT2    | -0.01329 | 1.87E-05 | 0.000229 |
| 209581_at   | PLA2G16  | -0.01022 | 0.000199 | 0.001778 |
| 209584_x_at | APOBEC3C | 0.008673 | 4.77E-07 | 9.11E-06 |
| 209585_s_at | MINPP1   | -0.00882 | 0.00053  | 0.004122 |
| 209590_at   | BMP7     | -0.0121  | 0.00314  | 0.01771  |
| 209599_s_at | PRUNE    | -0.00609 | 0.00021  | 0.001858 |
| 209600_s_at | ACOX1    | -0.01708 | 1.78E-13 | 2.73E-11 |
| 209605_at   | TST      | -0.01644 | 2.29E-14 | 4.99E-12 |
| 209606_at   | CYTIP    | 0.018936 | 1.03E-08 | 3.06E-07 |
| 209608_s_at | ACAT2    | -0.01068 | 3.28E-06 | 4.96E-05 |
| 209609_s_at | MRPL9    | -0.00582 | 0.001367 | 0.008947 |
| 209612_s_at | ADH1B    | 0.029614 | 3.57E-11 | 2.55E-09 |
| 209613_s_at | ADH1B    | 0.027688 | 2.46E-07 | 5.05E-06 |
| 209614_at   | ADH1B    | 0.018189 | 1.08E-08 | 3.18E-07 |
| 209619_at   | CD74     | 0.009706 | 0.000746 | 0.005461 |
| 209620_s_at | ABCB7    | -0.007   | 2.28E-05 | 0.000273 |
| 209623_at   | MCCC2    | -0.01521 | 4.18E-12 | 4.17E-10 |
| 209624_s_at | MCCC2    | -0.01453 | 3.88E-10 | 1.85E-08 |
| 209625_at   | PIGH     | -0.00489 | 0.0045   | 0.02377  |
| 209631_s_at | GPR37    | 0.007794 | 0.002812 | 0.016174 |
| 209640_at   | PML      | 0.004296 | 0.001001 | 0.006946 |
| 209645_s_at | ALDH1B1  | -0.01652 | 2.95E-07 | 5.97E-06 |
| 209646_x_at | ALDH1B1  | -0.0094  | 1.23E-08 | 3.57E-07 |
| 209655_s_at | TMEM47   | 0.006001 | 0.006741 | 0.032674 |
| 209656_s_at | TMEM47   | 0.007362 | 0.007106 | 0.034185 |

|             |          |          |          |          |
|-------------|----------|----------|----------|----------|
| 209660_at   | TTR      | -0.00824 | 0.002833 | 0.016269 |
| 209663_s_at | ITGA7    | -0.01149 | 1.56E-05 | 0.000195 |
| 209666_s_at | CHUK     | -0.00681 | 0.008355 | 0.038737 |
| 209667_at   | CES2     | -0.01799 | 4.97E-15 | 1.63E-12 |
| 209668_x_at | CES2     | -0.02033 | 1.07E-05 | 0.00014  |
| 209670_at   | TRAC     | 0.013116 | 6.27E-09 | 2.01E-07 |
| 209671_x_at | TRAC     | 0.02131  | 1.27E-11 | 1.1E-09  |
| 209679_s_at | SMAGP    | 0.00876  | 0.001388 | 0.009058 |
| 209680_s_at | KIFC1    | 0.006245 | 0.007076 | 0.034053 |
| 209681_at   | SLC19A2  | -0.01159 | 2.73E-05 | 0.000319 |
| 209682_at   | CBLB     | 0.005581 | 0.006986 | 0.033712 |
| 209683_at   | FAM49A   | 0.008929 | 0.000341 | 0.002813 |
| 209685_s_at | PRKCB    | 0.019934 | 1.74E-10 | 9.62E-09 |
| 209686_at   | S100B    | 0.016243 | 1.26E-09 | 4.96E-08 |
| 209687_at   | CXCL12   | 0.009637 | 0.004352 | 0.023137 |
| 209688_s_at | CCDC93   | -0.00575 | 0.004415 | 0.023391 |
| 209689_at   | CCDC93   | -0.00874 | 0.000516 | 0.004025 |
| 209692_at   | EYA2     | -0.00807 | 0.000119 | 0.001148 |
| 209696_at   | FBP1     | -0.0253  | 4.71E-10 | 2.17E-08 |
| 209703_x_at | METTL7A  | -0.01108 | 1.45E-07 | 3.16E-06 |
| 209708_at   | MOXD1    | 0.028066 | 6.36E-09 | 2.04E-07 |
| 209711_at   | SLC35D1  | -0.01164 | 0.001932 | 0.011917 |
| 209712_at   | SLC35D1  | -0.01394 | 2.49E-05 | 0.000295 |
| 209713_s_at | SLC35D1  | -0.00553 | 0.006575 | 0.032035 |
| 209715_at   | CBX5     | 0.007928 | 0.000162 | 0.001498 |
| 209722_s_at | SERPINB9 | 0.007432 | 0.000231 | 0.002021 |
| 209723_at   | SERPINB9 | 0.00938  | 0.000825 | 0.005938 |
| 209727_at   | GM2A     | 0.009293 | 0.0029   | 0.016592 |
| 209728_at   | HLA-DRB4 | 0.01869  | 0.00285  | 0.016351 |
| 209732_at   | CLEC2B   | 0.023128 | 1.57E-08 | 4.42E-07 |
| 209734_at   | NCKAP1L  | 0.012225 | 5.29E-07 | 9.96E-06 |
| 209736_at   | SOX13    | -0.00793 | 0.000575 | 0.004403 |
| 209739_s_at | PNPLA4   | -0.00888 | 9.3E-05  | 0.000931 |
| 209740_s_at | PNPLA4   | -0.00828 | 0.003844 | 0.020899 |
| 209749_s_at | ACE      | -0.00911 | 1.5E-05  | 0.000188 |
| 209752_at   | REG1A    | 0.012078 | 0.00498  | 0.0258   |
| 209753_s_at | TMPO     | 0.008155 | 0.002084 | 0.012669 |
| 209757_s_at | MYCN     | -0.01744 | 1.87E-08 | 5.14E-07 |
| 209759_s_at | DCI      | -0.00541 | 0.005547 | 0.028019 |
| 209761_s_at | SP110    | 0.006463 | 0.008049 | 0.037598 |
| 209762_x_at | SP110    | 0.013739 | 2.06E-06 | 3.31E-05 |
| 209764_at   | MGAT3    | -0.00997 | 8E-05    | 0.000815 |
| 209765_at   | ADAM19   | 0.008948 | 1.83E-06 | 2.96E-05 |
| 209770_at   | BTN3A1   | 0.007158 | 0.005175 | 0.026546 |
| 209771_x_at | CD24     | 0.009888 | 1.7E-06  | 2.77E-05 |
| 209772_s_at | CD24     | 0.013635 | 0.00099  | 0.00689  |
| 209773_s_at | RRM2     | 0.011142 | 0.000552 | 0.00425  |
| 209781_s_at | KHDRBS3  | -0.0076  | 0.000293 | 0.00247  |
| 209783_at   | DBP      | -0.00885 | 1.18E-06 | 2.02E-05 |

|             |           |          |          |          |
|-------------|-----------|----------|----------|----------|
| 209784_s_at | JAG2      | 0.004589 | 0.007192 | 0.034508 |
| 209786_at   | HMGN4     | 0.005361 | 0.011317 | 0.049303 |
| 209788_s_at | ERAP1     | 0.008013 | 0.001097 | 0.007483 |
| 209791_at   | PADI2     | -0.01392 | 9.5E-06  | 0.000126 |
| 209795_at   | CD69      | 0.025048 | 1.28E-07 | 2.82E-06 |
| 209797_at   | CNPY2     | -0.00519 | 0.004631 | 0.024343 |
| 209804_at   | DCLRE1A   | -0.00531 | 0.002005 | 0.012282 |
| 209806_at   | HIST1H2BK | 0.014948 | 3.44E-05 | 0.000393 |
| 209811_at   | CASP2     | 0.005184 | 0.000383 | 0.003105 |
| 209813_x_at | TARP      | 0.005375 | 0.009405 | 0.042534 |
| 209814_at   | ZNF330    | -0.00342 | 0.005735 | 0.02871  |
| 209818_s_at | HABP4     | -0.01033 | 1.13E-06 | 1.95E-05 |
| 209821_at   | IL33      | 0.007339 | 0.00535  | 0.027237 |
| 209823_x_at | HLA-DQB1  | 0.017855 | 1.79E-07 | 3.8E-06  |
| 209825_s_at | UCK2      | -0.00809 | 0.000139 | 0.001314 |
| 209827_s_at | IL16      | 0.020007 | 1.14E-10 | 6.79E-09 |
| 209828_s_at | IL16      | 0.010002 | 6.88E-05 | 0.000715 |
| 209833_at   | CRADD     | -0.01015 | 9.67E-08 | 2.2E-06  |
| 209835_x_at | CD44      | 0.024334 | 5.67E-10 | 2.53E-08 |
| 209837_at   | AP4M1     | 0.004683 | 0.008877 | 0.040629 |
| 209846_s_at | BTN3A2    | 0.012331 | 0.0003   | 0.002515 |
| 209848_s_at | SILV      | -0.00404 | 0.007537 | 0.035776 |
| 209857_s_at | SPHK2     | -0.00784 | 6.39E-05 | 0.000673 |
| 209862_s_at | CEP57     | 0.00461  | 0.010428 | 0.046296 |
| 209864_at   | FRAT2     | 0.006504 | 0.000967 | 0.00676  |
| 209869_at   | ADRA2A    | 0.012478 | 6.01E-06 | 8.48E-05 |
| 209874_x_at | CNNM2     | -0.00765 | 0.000208 | 0.001845 |
| 209879_at   | SELPLG    | 0.01152  | 3.58E-07 | 7.03E-06 |
| 209881_s_at | LAT       | 0.00587  | 0.001091 | 0.007451 |
| 209882_at   | RIT1      | -0.00503 | 0.001244 | 0.008272 |
| 209893_s_at | FUT4      | 0.006707 | 0.009693 | 0.043603 |
| 209897_s_at | SLIT2     | -0.01941 | 2.5E-10  | 1.29E-08 |
| 209900_s_at | SLC16A1   | -0.01293 | 1.5E-05  | 0.000188 |
| 209901_x_at | AIF1      | 0.011752 | 0.000843 | 0.006047 |
| 209905_at   | HOXA10    | -0.00645 | 0.001499 | 0.009649 |
| 209906_at   | C3AR1     | 0.015074 | 6.29E-07 | 1.16E-05 |
| 209909_s_at | TGFB2     | 0.012841 | 0.000539 | 0.004173 |
| 209910_at   | SLC25A16  | -0.00704 | 0.001798 | 0.01122  |
| 209911_x_at | HIST1H2BD | -0.00761 | 0.002294 | 0.013701 |
| 209916_at   | DHTKD1    | -0.02415 | 7.63E-08 | 1.78E-06 |
| 209919_x_at | GGT1      | -0.01466 | 4.63E-07 | 8.86E-06 |
| 209924_at   | CCL18     | 0.008552 | 0.003685 | 0.020199 |
| 209925_at   | OCLN      | 0.008332 | 0.004804 | 0.025076 |
| 209931_s_at | FKBP1B    | 0.006552 | 0.005106 | 0.026318 |
| 209933_s_at | CD300A    | 0.011853 | 2.49E-06 | 3.89E-05 |
| 209940_at   | PARP3     | -0.00537 | 0.001771 | 0.011085 |
| 209949_at   | NCF2      | 0.021324 | 3.06E-08 | 7.95E-07 |
| 209961_s_at | HGF       | 0.017622 | 7.83E-06 | 0.000107 |
| 209966_x_at | ESRRG     | -0.01281 | 2.47E-08 | 6.57E-07 |

|             |          |          |          |          |
|-------------|----------|----------|----------|----------|
| 209968_s_at | NCAM1    | 0.009428 | 0.001095 | 0.007474 |
| 209969_s_at | STAT1    | 0.008147 | 0.00616  | 0.030412 |
| 209970_x_at | CASP1    | 0.018375 | 7.43E-09 | 2.32E-07 |
| 209977_at   | PLG      | -0.04786 | 3.18E-14 | 6.63E-12 |
| 209978_s_at | LPA      | -0.05176 | 1.61E-14 | 4.08E-12 |
| 209980_s_at | SHMT1    | -0.01619 | 9.71E-06 | 0.000129 |
| 209981_at   | CSDC2    | -0.01138 | 4.25E-05 | 0.000472 |
| 209992_at   | PFKFB2   | -0.01874 | 4.77E-08 | 1.18E-06 |
| 209993_at   | ABCB1    | -0.00912 | 0.009907 | 0.044406 |
| 209995_s_at | TCL1A    | 0.007312 | 0.004474 | 0.023651 |
| 210009_s_at | GOSR2    | -0.01172 | 0.000348 | 0.002857 |
| 210014_x_at | IDH3B    | -0.00915 | 0.000108 | 0.001055 |
| 210018_x_at | MALT1    | 0.0073   | 0.011203 | 0.048945 |
| 210020_x_at | CALML3   | -0.0119  | 0.000683 | 0.005085 |
| 210021_s_at | CCNO     | 0.008607 | 4.08E-05 | 0.000457 |
| 210026_s_at | CARD10   | -0.00836 | 0.006617 | 0.0322   |
| 210029_at   | IDO1     | 0.006765 | 0.001251 | 0.0083   |
| 210031_at   | CD247    | 0.013967 | 2.41E-10 | 1.26E-08 |
| 210038_at   | PRKCQ    | 0.010655 | 0.003927 | 0.021273 |
| 210045_at   | IDH2     | -0.02127 | 1.55E-08 | 4.38E-07 |
| 210046_s_at | IDH2     | -0.01728 | 2.26E-14 | 4.99E-12 |
| 210049_at   | SERPINC1 | -0.00881 | 0.001051 | 0.007231 |
| 210059_s_at | MAPK13   | 0.006638 | 0.003494 | 0.019338 |
| 210063_at   | SARDH    | -0.00545 | 0.007076 | 0.034053 |
| 210072_at   | CCL19    | 0.030096 | 2.23E-10 | 1.18E-08 |
| 210074_at   | CTSL2    | -0.02313 | 3.04E-09 | 1.07E-07 |
| 210079_x_at | KCNAB1   | -0.00669 | 0.003394 | 0.018896 |
| 210082_at   | ABCA4    | 0.006351 | 0.002136 | 0.012898 |
| 210084_x_at | TPSAB1   | 0.025083 | 2.14E-14 | 4.99E-12 |
| 210085_s_at | ANXA9    | -0.01812 | 4.61E-07 | 8.83E-06 |
| 210089_s_at | LAMA4    | 0.010727 | 4.05E-05 | 0.000455 |
| 210095_s_at | IGFBP3   | 0.010918 | 2.09E-05 | 0.000252 |
| 210105_s_at | FYN      | -0.01074 | 0.000212 | 0.001873 |
| 210114_at   | INVS     | -0.00969 | 2.58E-05 | 0.000304 |
| 210115_at   | RPL39L   | 0.008708 | 7.3E-05  | 0.000755 |
| 210116_at   | SH2D1A   | 0.020632 | 3.13E-08 | 8.06E-07 |
| 210119_at   | KCNJ15   | -0.01126 | 8.48E-09 | 2.59E-07 |
| 210127_at   | RAB6B    | 0.011096 | 0.000562 | 0.004313 |
| 210130_s_at | TM7SF2   | -0.00596 | 0.007809 | 0.036755 |
| 210131_x_at | SDHC     | -0.00921 | 8.22E-05 | 0.000835 |
| 210139_s_at | PMP22    | 0.013264 | 3.19E-06 | 4.83E-05 |
| 210140_at   | CST7     | 0.019127 | 1.03E-08 | 3.05E-07 |
| 210145_at   | PLA2G4A  | 0.012967 | 6.38E-05 | 0.000672 |
| 210146_x_at | LILRB2   | 0.016865 | 3.42E-05 | 0.000392 |
| 210148_at   | HIPK3    | -0.0071  | 0.001349 | 0.008849 |
| 210164_at   | GZMB     | 0.008099 | 0.001523 | 0.009761 |
| 210165_at   | DNASE1   | -0.01011 | 0.000109 | 0.001065 |
| 210166_at   | TLR5     | 0.011703 | 2.24E-07 | 4.66E-06 |
| 210177_at   | TRIM15   | -0.00448 | 0.002284 | 0.013656 |

|             |              |          |          |          |
|-------------|--------------|----------|----------|----------|
| 210180_s_at | TRA2B        | 0.006673 | 0.007709 | 0.036422 |
| 210184_at   | ITGAX        | 0.007342 | 0.000353 | 0.002889 |
| 210199_at   | CRYAA        | -0.02012 | 7.36E-06 | 0.000101 |
| 210201_x_at | BIN1         | -0.01259 | 2.53E-05 | 0.000299 |
| 210211_s_at | HSP90AA1     | -0.00433 | 0.000813 | 0.005872 |
| 210212_x_at | MTCP1NB      | -0.00524 | 0.002182 | 0.013131 |
| 210218_s_at | SP100        | 0.00727  | 0.004041 | 0.021769 |
| 210223_s_at | MR1          | 0.008023 | 0.000454 | 0.003602 |
| 210225_x_at | LILRB3       | 0.006354 | 0.005256 | 0.026875 |
| 210227_at   | DLGAP2       | -0.00831 | 0.001169 | 0.007865 |
| 210235_s_at | PPFIA1       | -0.00576 | 0.005231 | 0.026758 |
| 210254_at   | MS4A3        | 0.005186 | 0.006638 | 0.032286 |
| 210260_s_at | TNFAIP8      | 0.015895 | 3.13E-09 | 1.09E-07 |
| 210262_at   | CRISP2       | -0.00724 | 0.005502 | 0.027845 |
| 210284_s_at | TAB2         | -0.00432 | 0.008443 | 0.039063 |
| 210285_x_at | WTAP         | 0.005333 | 0.008455 | 0.039076 |
| 210289_at   | NAT8         | -0.02355 | 1.18E-06 | 2.02E-05 |
| 210298_x_at | FHL1         | 0.017161 | 1.37E-06 | 2.29E-05 |
| 210299_s_at | FHL1         | 0.015    | 1.72E-05 | 0.000212 |
| 210321_at   | GZMH         | 0.007279 | 0.001732 | 0.010883 |
| 210326_at   | AGXT         | -0.01261 | 0.00051  | 0.003983 |
| 210327_s_at | AGXT         | -0.00865 | 0.004056 | 0.021831 |
| 210331_at   | HECW1        | -0.01134 | 0.000314 | 0.002622 |
| 210335_at   | RASSF9       | 0.010694 | 0.00087  | 0.006223 |
| 210337_s_at | ACLY         | -0.00889 | 4.67E-05 | 0.000513 |
| 210338_s_at | HSPA8        | -0.00816 | 5.07E-05 | 0.000551 |
| 210340_s_at | CSF2RA       | 0.008336 | 0.000204 | 0.001817 |
| 210343_s_at | SLC22A6      | -0.0313  | 2.93E-12 | 3.07E-10 |
| 210356_x_at | MS4A1        | 0.026176 | 3.63E-08 | 9.2E-07  |
| 210361_s_at | ELF2         | 0.00699  | 0.000782 | 0.005673 |
| 210362_x_at | PML          | 0.003081 | 0.01132  | 0.049303 |
| 210367_s_at | PTGES        | 0.0095   | 9.62E-07 | 1.71E-05 |
| 210372_s_at | TPD52L1      | 0.006784 | 0.007677 | 0.036294 |
| 210374_x_at | PTGER3       | -0.0162  | 1.75E-10 | 9.67E-09 |
| 210375_at   | PTGER3       | -0.0215  | 1.34E-11 | 1.15E-09 |
| 210377_at   | ACSM3        | -0.01769 | 5.83E-07 | 1.09E-05 |
| 210385_s_at | ERAP1        | 0.006371 | 0.000887 | 0.006327 |
| 210386_s_at | LOC100510712 | -0.00753 | 0.000145 | 0.001361 |
| 210390_s_at | CCL14-CCL15  | -0.02254 | 3.88E-09 | 1.31E-07 |
| 210399_x_at | FUT6         | -0.01394 | 4.36E-10 | 2.03E-08 |
| 210414_at   | FLRT1        | -0.00978 | 0.000728 | 0.005363 |
| 210415_s_at | ODF2         | 0.005064 | 0.006193 | 0.030534 |
| 210418_s_at | IDH3B        | -0.01006 | 6.02E-05 | 0.000641 |
| 210424_s_at | GOLGA8A      | 0.006871 | 0.005659 | 0.028464 |
| 210426_x_at | RORA         | -0.0125  | 1.2E-09  | 4.77E-08 |
| 210427_x_at | ANXA2        | 0.016864 | 1.13E-09 | 4.51E-08 |
| 210439_at   | ICOS         | 0.00853  | 0.009445 | 0.042673 |
| 210444_at   | NPY6R        | -0.01186 | 0.000393 | 0.003173 |
| 210448_s_at | P2RX5        | 0.009285 | 0.000455 | 0.003606 |

|             |           |          |          |          |
|-------------|-----------|----------|----------|----------|
| 210451_at   | PKLR      | -0.02552 | 2.73E-10 | 1.38E-08 |
| 210452_x_at | CYP4F2    | -0.03347 | 1.8E-13  | 2.74E-11 |
| 210458_s_at | TANK      | 0.009822 | 0.001341 | 0.008804 |
| 210471_s_at | KCNAB1    | -0.00793 | 2.92E-05 | 0.00034  |
| 210476_s_at | PRLR      | -0.02521 | 1.12E-13 | 1.84E-11 |
| 210479_s_at | RORA      | -0.01286 | 3.88E-08 | 9.76E-07 |
| 210480_s_at | MYO6      | -0.00687 | 0.000994 | 0.00691  |
| 210493_s_at | MFAP3L    | -0.01121 | 3.8E-06  | 5.65E-05 |
| 210495_x_at | FN1       | 0.010858 | 0.000295 | 0.002482 |
| 210512_s_at | VEGFA     | -0.00951 | 5.9E-05  | 0.00063  |
| 210513_s_at | VEGFA     | -0.01858 | 3.94E-10 | 1.87E-08 |
| 210514_x_at | HLA-G     | 0.011034 | 0.000272 | 0.002315 |
| 210524_x_at |           | -0.00703 | 0.008191 | 0.038143 |
| 210538_s_at | BIRC3     | 0.019083 | 2.32E-07 | 4.8E-06  |
| 210540_s_at | B4GALT4   | -0.00724 | 0.000416 | 0.003343 |
| 210544_s_at | ALDH3A2   | -0.01516 | 9.83E-06 | 0.00013  |
| 210550_s_at | RASGRF1   | -0.00837 | 0.000383 | 0.003103 |
| 210565_at   | GCCR      | 0.005058 | 0.007618 | 0.036093 |
| 210606_x_at | KLRD1     | 0.004915 | 0.00893  | 0.040832 |
| 210607_at   | FLT3LG    | 0.005676 | 0.006544 | 0.031913 |
| 210619_s_at | HYAL1     | -0.01863 | 5.16E-16 | 2.95E-13 |
| 210624_s_at | ILVBL     | -0.00664 | 0.002204 | 0.013241 |
| 210629_x_at | LST1      | 0.016524 | 2.96E-09 | 1.05E-07 |
| 210638_s_at | FBXO9     | -0.00402 | 0.002783 | 0.016034 |
| 210640_s_at | GPBR      | -0.00573 | 0.003912 | 0.021206 |
| 210644_s_at | LAIR1     | 0.011206 | 9.82E-06 | 0.00013  |
| 210646_x_at | RPL13A    | 0.007459 | 0.000695 | 0.005163 |
| 210651_s_at | EPHB2     | 0.004286 | 0.009517 | 0.042925 |
| 210653_s_at | BCKDHB    | -0.01512 | 2.31E-07 | 4.79E-06 |
| 210654_at   | TNFRSF10D | -0.00584 | 0.000838 | 0.006013 |
| 210657_s_at | SEPT4     | 0.007792 | 0.009577 | 0.043142 |
| 210658_s_at | GGA2      | -0.00455 | 0.006018 | 0.02988  |
| 210659_at   | CMKLR1    | 0.00602  | 0.004851 | 0.025272 |
| 210660_at   | LILRA1    | 0.007944 | 0.001458 | 0.009421 |
| 210663_s_at | KYNU      | -0.01536 | 6.85E-06 | 9.5E-05  |
| 210667_s_at | C21orf33  | -0.00914 | 0.010688 | 0.047234 |
| 210674_s_at | PCDHA1    | 0.008516 | 0.002925 | 0.016705 |
| 210685_s_at | UBE4B     | -0.00582 | 0.01062  | 0.047007 |
| 210687_at   | CPT1A     | -0.00789 | 0.00716  | 0.034413 |
| 210692_s_at | SLC43A3   | 0.008324 | 0.000614 | 0.00464  |
| 210706_s_at | RNF24     | 0.007886 | 0.003114 | 0.017591 |
| 210737_at   | TUB       | -0.00495 | 0.005827 | 0.029098 |
| 210738_s_at | SLC4A4    | -0.03494 | 1.77E-16 | 1.31E-13 |
| 210739_x_at | SLC4A4    | -0.0267  | 1.97E-15 | 7.44E-13 |
| 210740_s_at | ITPK1     | -0.00463 | 6.12E-06 | 8.61E-05 |
| 210742_at   | CDC14A    | -0.01268 | 0.000192 | 0.001727 |
| 210750_s_at | DLGAP1    | 0.004965 | 0.007505 | 0.03568  |
| 210751_s_at | RGN       | -0.01828 | 1.28E-10 | 7.44E-09 |
| 210754_s_at | LYN       | 0.015176 | 7.22E-09 | 2.27E-07 |

|             |           |          |          |          |
|-------------|-----------|----------|----------|----------|
| 210757_x_at | DAB2      | -0.01223 | 5.95E-10 | 2.63E-08 |
| 210764_s_at | CYR61     | 0.019387 | 5.02E-05 | 0.000548 |
| 210774_s_at | NCOA4     | -0.0054  | 7.91E-06 | 0.000108 |
| 210784_x_at | LILRA6    | 0.007092 | 0.002701 | 0.015655 |
| 210785_s_at | C1orf38   | 0.014071 | 5.43E-08 | 1.31E-06 |
| 210786_s_at | FLI1      | 0.014469 | 4E-10    | 1.89E-08 |
| 210796_x_at | SIGLEC6   | 0.008837 | 0.000819 | 0.005903 |
| 210805_x_at | RUNX1     | 0.007483 | 0.000323 | 0.002681 |
| 210807_s_at | SLC16A7   | -0.01561 | 2.33E-06 | 3.68E-05 |
| 210815_s_at | CALCRL    | 0.007981 | 0.004315 | 0.022965 |
| 210825_s_at | PEBP1     | -0.006   | 5.05E-10 | 2.29E-08 |
| 210827_s_at | ELF3      | 0.00992  | 0.000743 | 0.005446 |
| 210829_s_at | SSBP2     | 0.009433 | 9.89E-06 | 0.00013  |
| 210831_s_at | PTGER3    | -0.01704 | 5.8E-11  | 3.8E-09  |
| 210832_x_at | PTGER3    | -0.01986 | 5.57E-14 | 1.01E-11 |
| 210833_at   | PTGER3    | -0.02472 | 2.21E-14 | 4.99E-12 |
| 210834_s_at | PTGER3    | -0.02355 | 4.27E-11 | 2.94E-09 |
| 210838_s_at | ACVRL1    | 0.005317 | 0.001638 | 0.010373 |
| 210839_s_at | ENPP2     | -0.01753 | 8.41E-12 | 7.61E-10 |
| 210840_s_at | IQGAP1    | 0.010753 | 2.74E-08 | 7.2E-07  |
| 210843_s_at | MFAP3L    | -0.01136 | 1.04E-06 | 1.83E-05 |
| 210852_s_at | AASS      | -0.01378 | 8.73E-12 | 7.87E-10 |
| 210854_x_at | SLC6A8    | -0.01363 | 0.001165 | 0.007843 |
| 210862_s_at | SARDH     | -0.00864 | 4.15E-05 | 0.000463 |
| 210870_s_at | EPM2A     | -0.00927 | 0.002774 | 0.016003 |
| 210871_x_at | SSX2IP    | -0.01154 | 4.33E-06 | 6.35E-05 |
| 210872_x_at | GAS7      | 0.006943 | 0.001475 | 0.00951  |
| 210879_s_at | RAB11FIP5 | -0.0109  | 1.11E-06 | 1.93E-05 |
| 210887_s_at | EVC       | 0.007611 | 0.000147 | 0.001379 |
| 210889_s_at | FCGR2B    | 0.015922 | 4.4E-09  | 1.45E-07 |
| 210895_s_at | CD86      | 0.008551 | 0.000576 | 0.004405 |
| 210896_s_at | ASPH      | -0.00937 | 0.006018 | 0.02988  |
| 210908_s_at | PFDN5     | 0.008035 | 0.00366  | 0.020099 |
| 210912_x_at | GSTM4     | -0.01091 | 3.75E-05 | 0.000425 |
| 210915_x_at | TRBC1     | 0.036454 | 3.3E-14  | 6.68E-12 |
| 210916_s_at | CD44      | 0.024614 | 8.18E-08 | 1.9E-06  |
| 210928_at   |           | 0.013389 | 0.002499 | 0.014693 |
| 210942_s_at | ST3GAL6   | -0.0082  | 0.000233 | 0.002036 |
| 210944_s_at | CAPN3     | -0.02528 | 2.95E-11 | 2.2E-09  |
| 210947_s_at | MSH3      | -0.01185 | 3.13E-08 | 8.06E-07 |
| 210950_s_at | FDFT1     | -0.00395 | 0.008323 | 0.038597 |
| 210951_x_at | RAB27A    | 0.017887 | 4.52E-08 | 1.12E-06 |
| 210957_s_at | AFF2      | 0.008003 | 0.007972 | 0.037318 |
| 210958_s_at | MAST4     | -0.00757 | 0.000196 | 0.001756 |
| 210959_s_at | SRD5A1    | -0.00663 | 0.004252 | 0.02271  |
| 210966_x_at | LARP1     | -0.00867 | 0.002098 | 0.012728 |
| 210972_x_at | TRAC      | 0.023832 | 1.55E-11 | 1.28E-09 |
| 210973_s_at | FGFR1     | 0.009445 | 0.000939 | 0.006623 |
| 210976_s_at | PFKM      | -0.00852 | 0.001112 | 0.00756  |



|             |           |          |          |          |
|-------------|-----------|----------|----------|----------|
| 210978_s_at | TAGLN2    | 0.010789 | 0.004677 | 0.024526 |
| 210980_s_at | ASAH1     | -0.00458 | 0.007519 | 0.035715 |
| 210981_s_at | GRK6      | 0.006324 | 0.005595 | 0.028208 |
| 210982_s_at | HLA-DRA   | 0.018927 | 1.72E-08 | 4.77E-07 |
| 210983_s_at | MCM7      | 0.005121 | 0.002284 | 0.013656 |
| 210986_s_at | TPM1      | 0.015078 | 4.72E-09 | 1.55E-07 |
| 210987_x_at | TPM1      | 0.013448 | 5.73E-11 | 3.77E-09 |
| 210990_s_at | LAMA4     | 0.007472 | 0.000156 | 0.001452 |
| 210992_x_at | FCGR2C    | 0.012059 | 1.81E-08 | 5E-07    |
| 210999_s_at | GRB10     | -0.00933 | 1.41E-05 | 0.000178 |
| 211002_s_at | TRIM29    | 0.011017 | 5.24E-08 | 1.27E-06 |
| 211005_at   | LAT       | 0.017889 | 9.37E-09 | 2.82E-07 |
| 211009_s_at | ZNF271    | -0.00692 | 0.003677 | 0.020176 |
| 211015_s_at | HSPA4     | -0.00501 | 0.004102 | 0.022029 |
| 211016_x_at | HSPA4     | -0.00777 | 0.000824 | 0.00593  |
| 211020_at   | GCNT2     | -0.00796 | 0.000452 | 0.003589 |
| 211023_at   | PDHB      | -0.00367 | 0.007712 | 0.036426 |
| 211025_x_at | COX5B     | -0.00577 | 0.000299 | 0.002508 |
| 211028_s_at | KHK       | -0.03121 | 1.47E-13 | 2.33E-11 |
| 211034_s_at | C12orf51  | -0.00573 | 0.000786 | 0.005695 |
| 211052_s_at | TBCD      | -0.00534 | 0.003487 | 0.019312 |
| 211058_x_at | TUBA1B    | 0.007224 | 0.001361 | 0.008917 |
| 211060_x_at | GPAA1     | -0.0044  | 0.002354 | 0.013988 |
| 211061_s_at | MGAT2     | -0.00473 | 0.004239 | 0.02266  |
| 211067_s_at | GAS7      | 0.007265 | 6.84E-05 | 0.000712 |
| 211068_x_at | FAM21C    | -0.00641 | 0.000313 | 0.002614 |
| 211072_x_at | TUBA1B    | 0.008131 | 0.000819 | 0.005902 |
| 211075_s_at | CD47      | 0.014107 | 5.9E-09  | 1.9E-07  |
| 211083_s_at | MAP3K13   | -0.01173 | 1.26E-05 | 0.000161 |
| 211103_at   | MYO7A     | -0.00938 | 0.000998 | 0.006929 |
| 211105_s_at | NFATC1    | 0.010105 | 4.16E-06 | 6.13E-05 |
| 211117_x_at | ESR2      | 0.00647  | 0.002364 | 0.014039 |
| 211118_x_at | ESR2      | 0.007116 | 0.000433 | 0.003462 |
| 211120_x_at | ESR2      | 0.006881 | 0.000644 | 0.004841 |
| 211124_s_at | KITLG     | 0.008212 | 0.00959  | 0.043193 |
| 211136_s_at | CLPTM1    | -0.01647 | 2.3E-05  | 0.000274 |
| 211138_s_at | KMO       | -0.03104 | 3.62E-15 | 1.3E-12  |
| 211142_x_at | HLA-DOA   | 0.005262 | 0.005275 | 0.026941 |
| 211148_s_at | ANGPT2    | 0.010565 | 6.97E-06 | 9.66E-05 |
| 211150_s_at | DLAT      | -0.00895 | 1.64E-06 | 2.68E-05 |
| 211160_x_at | ACTN1     | 0.009799 | 0.000226 | 0.001987 |
| 211161_s_at | COL3A1    | 0.022098 | 2.61E-06 | 4.05E-05 |
| 211162_x_at | SCD       | -0.01197 | 3.58E-07 | 7.03E-06 |
| 211163_s_at | TNFRSF10C | 0.00535  | 0.004848 | 0.025261 |
| 211165_x_at | EPHB2     | 0.006623 | 0.001457 | 0.009416 |
| 211168_s_at | UPF1      | -0.00859 | 0.000102 | 0.001011 |
| 211170_s_at | PDE10A    | -0.01015 | 5.03E-06 | 7.21E-05 |
| 211178_s_at | PSTPIP1   | 0.006245 | 0.000491 | 0.003858 |
| 211179_at   | RUNX1     | 0.005545 | 0.004394 | 0.023311 |

|             |           |          |          |          |
|-------------|-----------|----------|----------|----------|
| 211181_x_at | RUNX1     | 0.011197 | 2.12E-05 | 0.000256 |
| 211182_x_at | RUNX1     | 0.016036 | 2.45E-06 | 3.84E-05 |
| 211184_s_at | USH1C     | -0.01623 | 7.69E-06 | 0.000105 |
| 211189_x_at | CD84      | 0.007663 | 0.00027  | 0.002302 |
| 211190_x_at | CD84      | 0.009193 | 0.000365 | 0.002979 |
| 211192_s_at | CD84      | 0.013124 | 4.62E-06 | 6.71E-05 |
| 211202_s_at | KDM5B     | 0.006629 | 0.00075  | 0.005483 |
| 211210_x_at | SH2D1A    | 0.006032 | 0.001932 | 0.011917 |
| 211211_x_at | SH2D1A    | 0.006635 | 0.001433 | 0.009292 |
| 211220_s_at | HSF2      | 0.005256 | 0.001823 | 0.011345 |
| 211231_x_at | CYP4A11   | -0.03252 | 2.92E-12 | 3.07E-10 |
| 211256_x_at | BTN2A1    | 0.006278 | 0.001606 | 0.010209 |
| 211269_s_at | IL2RA     | 0.008575 | 0.006426 | 0.031462 |
| 211272_s_at | DGKA      | 0.005682 | 0.000893 | 0.006361 |
| 211275_s_at | GYG1      | 0.008321 | 0.000121 | 0.001158 |
| 211285_s_at | UBE3A     | -0.00514 | 0.000904 | 0.006429 |
| 211286_x_at | CSF2RA    | 0.006835 | 0.000264 | 0.002263 |
| 211298_s_at | ALB       | -0.0455  | 2.35E-11 | 1.79E-09 |
| 211300_s_at | TP53      | 0.004728 | 0.008099 | 0.037794 |
| 211302_s_at | PDE4B     | 0.009293 | 3.6E-05  | 0.00041  |
| 211303_x_at | FOLH1B    | -0.02993 | 1.05E-11 | 9.32E-10 |
| 211322_s_at | SARDH     | -0.01087 | 0.002044 | 0.012481 |
| 211336_x_at | LILRB1    | 0.006195 | 0.003559 | 0.019625 |
| 211337_s_at | TUBGCP4   | -0.00575 | 0.011202 | 0.048945 |
| 211339_s_at | ITK       | 0.008888 | 0.001343 | 0.008812 |
| 211347_at   | CDC14B    | -0.01037 | 2.6E-06  | 4.04E-05 |
| 211348_s_at | CDC14B    | -0.00755 | 8.48E-08 | 1.96E-06 |
| 211352_s_at | NCOA3     | 0.010735 | 2.98E-06 | 4.56E-05 |
| 211357_s_at | ALDOB     | -0.01605 | 4.68E-08 | 1.16E-06 |
| 211360_s_at | ITPR2     | -0.00681 | 0.002183 | 0.013131 |
| 211366_x_at | CASP1     | 0.019106 | 5.03E-11 | 3.41E-09 |
| 211367_s_at | CASP1     | 0.02017  | 9.86E-09 | 2.94E-07 |
| 211368_s_at | CASP1     | 0.023812 | 2.8E-10  | 1.41E-08 |
| 211369_at   |           | -0.00596 | 0.006833 | 0.033072 |
| 211382_s_at | TACC2     | -0.00849 | 0.000182 | 0.001656 |
| 211395_x_at | FCGR2C    | 0.01551  | 5.44E-08 | 1.31E-06 |
| 211406_at   | IER3IP1   | -0.00561 | 6.32E-05 | 0.000669 |
| 211413_s_at | PADI4     | 0.00431  | 0.005137 | 0.026431 |
| 211416_x_at | GGTLC1    | -0.00966 | 0.000373 | 0.003032 |
| 211417_x_at | GGT1      | -0.01407 | 1.28E-07 | 2.82E-06 |
| 211429_s_at | SERPINA1  | -0.01524 | 4.93E-07 | 9.35E-06 |
| 211430_s_at | IGHG1     | 0.047914 | 1.01E-09 | 4.1E-08  |
| 211432_s_at | TYRO3     | -0.00984 | 0.009511 | 0.042917 |
| 211456_x_at | MT1P2     | -0.0103  | 0.004013 | 0.02166  |
| 211458_s_at | GABARAPL1 | -0.0053  | 7.42E-06 | 0.000102 |
| 211460_at   | TTTY9A    | -0.0133  | 0.005838 | 0.029141 |
| 211465_x_at | FUT6      | -0.01835 | 2.44E-12 | 2.65E-10 |
| 211468_s_at | RECQL5    | -0.00568 | 0.00543  | 0.027568 |
| 211470_s_at | SULT1C2   | -0.01213 | 2E-08    | 5.47E-07 |

|             |           |          |          |          |
|-------------|-----------|----------|----------|----------|
| 211478_s_at | DPP4      | -0.01143 | 0.00348  | 0.019274 |
| 211488_s_at | ITGB8     | 0.011737 | 0.000211 | 0.001871 |
| 211494_s_at | SLC4A4    | -0.02138 | 1.06E-14 | 2.87E-12 |
| 211502_s_at | CDK14     | -0.00869 | 1.09E-05 | 0.000142 |
| 211505_s_at | STAU1     | -0.01553 | 5.83E-08 | 1.39E-06 |
| 211506_s_at | IL8       | 0.011319 | 0.001574 | 0.010041 |
| 211509_s_at | RTN4      | -0.00428 | 0.000402 | 0.003237 |
| 211518_s_at | BMP4      | 0.007881 | 0.000207 | 0.001842 |
| 211527_x_at | VEGFA     | -0.01244 | 5.41E-07 | 1.02E-05 |
| 211528_x_at | HLA-G     | 0.008333 | 0.004672 | 0.024512 |
| 211529_x_at | HLA-G     | 0.010694 | 6.37E-05 | 0.000671 |
| 211530_x_at | HLA-G     | 0.006622 | 0.00051  | 0.003984 |
| 211534_x_at | PTPRN2    | 0.010154 | 0.000742 | 0.005441 |
| 211542_x_at | RPS10     | 0.010562 | 5.22E-06 | 7.49E-05 |
| 211546_x_at | SNCA      | 0.004533 | 0.008842 | 0.040497 |
| 211548_s_at | HPGD      | -0.02568 | 4.79E-14 | 9.01E-12 |
| 211549_s_at | HPGD      | -0.01334 | 2.07E-08 | 5.63E-07 |
| 211552_s_at | ALDH4A1   | -0.02647 | 1.75E-16 | 1.31E-13 |
| 211554_s_at | APAF1     | 0.00854  | 0.000826 | 0.005942 |
| 211555_s_at | GUCY1B3   | 0.007564 | 0.001086 | 0.007427 |
| 211565_at   | SH3GL3    | 0.012864 | 0.006252 | 0.030775 |
| 211569_s_at | HADH      | -0.02491 | 2.21E-16 | 1.54E-13 |
| 211571_s_at | VCAN      | 0.034785 | 5.48E-10 | 2.45E-08 |
| 211576_s_at | SLC19A1   | -0.00886 | 0.002849 | 0.016349 |
| 211577_s_at | IGF1      | 0.006116 | 0.011416 | 0.049623 |
| 211581_x_at | LST1      | 0.020124 | 1.27E-10 | 7.42E-09 |
| 211582_x_at | LST1      | 0.021779 | 9.9E-12  | 8.86E-10 |
| 211588_s_at | LOC652346 | 0.005466 | 0.002899 | 0.016589 |
| 211597_s_at | HOPX      | 0.028823 | 2.67E-10 | 1.35E-08 |
| 211600_at   | PTPRO     | -0.00295 | 0.00206  | 0.012563 |
| 211602_s_at | TRPC1     | 0.008377 | 0.001127 | 0.007649 |
| 211615_s_at | LRPPRC    | -0.01186 | 3.38E-09 | 1.16E-07 |
| 211620_x_at | RUNX1     | 0.01083  | 4.8E-06  | 6.92E-05 |
| 211628_x_at | FTH1P5    | -0.00462 | 0.002932 | 0.016739 |
| 211630_s_at | GSS       | -0.01014 | 0.000242 | 0.002104 |
| 211633_x_at |           | 0.019352 | 7.21E-09 | 2.27E-07 |
| 211634_x_at | IGHM      | 0.023826 | 1.35E-07 | 2.96E-06 |
| 211635_x_at | IGHA1     | 0.016828 | 3.41E-06 | 5.14E-05 |
| 211637_x_at | IGHA1     | 0.024775 | 1.3E-06  | 2.19E-05 |
| 211639_x_at | IGHA1     | 0.016947 | 2.58E-07 | 5.28E-06 |
| 211640_x_at | IGHG1     | 0.019515 | 7.23E-09 | 2.27E-07 |
| 211641_x_at | IGHA1     | 0.019389 | 5.28E-10 | 2.38E-08 |
| 211642_at   | IGHG1     | 0.007136 | 0.003356 | 0.018731 |
| 211643_x_at | IGK@      | 0.033814 | 1.72E-11 | 1.39E-09 |
| 211644_x_at | IGK@      | 0.042003 | 2.02E-10 | 1.09E-08 |
| 211645_x_at |           | 0.036562 | 1.54E-11 | 1.28E-09 |
| 211647_x_at | IGHG1     | 0.013329 | 4.9E-06  | 7.06E-05 |
| 211649_x_at | IGHA1     | 0.012557 | 1.25E-07 | 2.76E-06 |
| 211650_x_at | IGHA1     | 0.023468 | 6.59E-08 | 1.55E-06 |

|             |           |          |          |          |
|-------------|-----------|----------|----------|----------|
| 211654_x_at | HLA-DQB1  | 0.015945 | 0.000119 | 0.001143 |
| 211656_x_at | HLA-DQB1  | 0.01258  | 0.00042  | 0.003369 |
| 211662_s_at | VDAC2     | -0.00542 | 2.44E-05 | 0.000289 |
| 211663_x_at | PTGDS     | 0.007869 | 0.003112 | 0.017587 |
| 211673_s_at | MOCS1     | -0.00978 | 0.00026  | 0.002242 |
| 211676_s_at | IFNGR1    | 0.010208 | 0.010213 | 0.045514 |
| 211677_x_at | CADM3     | 0.005473 | 0.006239 | 0.030722 |
| 211682_x_at | UGT2B28   | -0.016   | 3.62E-11 | 2.58E-09 |
| 211689_s_at | TMPRSS2   | -0.01034 | 6.03E-05 | 0.000642 |
| 211695_x_at | MUC1      | 0.016995 | 9.4E-05  | 0.000939 |
| 211702_s_at | USP32     | -0.00642 | 0.001053 | 0.007236 |
| 211704_s_at | SPIN2A    | 0.004313 | 0.010543 | 0.046738 |
| 211708_s_at | SCD       | -0.01187 | 0.000187 | 0.001687 |
| 211712_s_at | ANXA9     | -0.01576 | 4.77E-14 | 9.01E-12 |
| 211715_s_at | BDH1      | -0.01335 | 1.09E-05 | 0.000142 |
| 211719_x_at | FN1       | 0.012176 | 7.65E-05 | 0.000786 |
| 211720_x_at | RPLP0     | 0.009505 | 0.006232 | 0.030703 |
| 211725_s_at | BID       | 0.008245 | 0.000613 | 0.004639 |
| 211727_s_at | COX11     | -0.00755 | 0.000186 | 0.001679 |
| 211733_x_at | SCP2      | -0.00784 | 4.41E-07 | 8.51E-06 |
| 211734_s_at | FCER1A    | 0.028266 | 2.08E-09 | 7.75E-08 |
| 211737_x_at | PTN       | 0.019612 | 3.82E-06 | 5.68E-05 |
| 211742_s_at | EVI2B     | 0.025043 | 9.59E-10 | 3.95E-08 |
| 211745_x_at | HBA1      | 0.016518 | 0.007273 | 0.034834 |
| 211751_at   | LOC653513 | 0.012976 | 0.00202  | 0.012351 |
| 211755_s_at | ATP5F1    | -0.00706 | 2.42E-08 | 6.45E-07 |
| 211761_s_at | CACYBP    | -0.0045  | 0.009287 | 0.042134 |
| 211763_s_at | UBE2B     | -0.0072  | 0.002519 | 0.014778 |
| 211774_s_at | MMACHC    | -0.00685 | 0.006566 | 0.032008 |
| 211776_s_at | EPB41L3   | -0.01866 | 3.75E-16 | 2.45E-13 |
| 211778_s_at | OVOL2     | 0.007374 | 0.000399 | 0.003222 |
| 211791_s_at | KCNAB2    | -0.00577 | 0.00421  | 0.022545 |
| 211794_at   | FYB       | 0.019665 | 6.9E-09  | 2.19E-07 |
| 211795_s_at | FYB       | 0.018104 | 1.63E-08 | 4.57E-07 |
| 211796_s_at | TRBC1     | 0.04594  | 8.65E-14 | 1.46E-11 |
| 211798_x_at | IGLJ3     | 0.021684 | 8.45E-09 | 2.59E-07 |
| 211799_x_at | HLA-C     | 0.01044  | 7.67E-05 | 0.000788 |
| 211802_x_at | CACNA1G   | 0.00406  | 0.008096 | 0.037787 |
| 211806_s_at | KCNJ15    | -0.01638 | 1.35E-06 | 2.26E-05 |
| 211813_x_at | DCN       | 0.016626 | 1.13E-05 | 0.000147 |
| 211820_x_at | GYPA      | -0.0128  | 1.22E-05 | 0.000156 |
| 211821_x_at | GYPA      | -0.01241 | 4.57E-05 | 0.000504 |
| 211822_s_at | NLRP1     | 0.005074 | 0.006837 | 0.033084 |
| 211825_s_at | EWSR1     | 0.011195 | 0.000166 | 0.001527 |
| 211831_s_at | THPO      | -0.01096 | 1.19E-05 | 0.000154 |
| 211838_x_at | PCDHA5    | 0.004044 | 0.009934 | 0.044474 |
| 211843_x_at | CYP3A7    | -0.01942 | 7.53E-09 | 2.34E-07 |
| 211844_s_at | NRP2      | 0.006461 | 0.002428 | 0.014372 |
| 211864_s_at | MYOF      | 0.015023 | 5.62E-08 | 1.35E-06 |

|             |          |          |          |          |
|-------------|----------|----------|----------|----------|
| 211868_x_at | IGHA1    | 0.00856  | 2.71E-05 | 0.000317 |
| 211871_x_at | GNB5     | -0.00903 | 0.000445 | 0.003547 |
| 211879_x_at | PCDHGA3  | 0.005196 | 0.002011 | 0.012307 |
| 211881_x_at | IGLJ3    | 0.021529 | 4.18E-09 | 1.39E-07 |
| 211882_x_at | FUT6     | -0.00831 | 2.29E-05 | 0.000273 |
| 211883_x_at | CEACAM1  | -0.01085 | 5.05E-05 | 0.00055  |
| 211885_x_at | FUT6     | -0.01231 | 6.09E-05 | 0.000647 |
| 211887_x_at | MSR1     | 0.015833 | 5.88E-07 | 1.09E-05 |
| 211889_x_at | CEACAM1  | -0.00781 | 0.000466 | 0.003685 |
| 211890_x_at | CAPN3    | -0.02916 | 3.88E-13 | 5.54E-11 |
| 211893_x_at | CD6      | 0.004619 | 0.008757 | 0.04016  |
| 211896_s_at | DCN      | 0.016726 | 2.09E-05 | 0.000252 |
| 211900_x_at | CD6      | 0.005982 | 0.001659 | 0.010495 |
| 211902_x_at | TRD@     | 0.019872 | 2.46E-11 | 1.86E-09 |
| 211905_s_at | ITGB4    | 0.006035 | 0.002815 | 0.016178 |
| 211907_s_at | PARD6B   | -0.00963 | 1.7E-06  | 2.77E-05 |
| 211908_x_at | IGKV3-20 | 0.014472 | 6.87E-07 | 1.26E-05 |
| 211911_x_at | HLA-B    | 0.016107 | 0.000154 | 0.001437 |
| 211917_s_at | PRLR     | -0.02292 | 5.62E-11 | 3.72E-09 |
| 211918_x_at | PAPPA2   | 0.023685 | 8.6E-09  | 2.62E-07 |
| 211919_s_at | CXCR4    | 0.029458 | 9.83E-10 | 4.03E-08 |
| 211921_x_at | PTMA     | 0.003932 | 0.001256 | 0.00833  |
| 211922_s_at | CAT      | -0.01448 | 1.97E-06 | 3.17E-05 |
| 211925_s_at | PLCB1    | 0.015374 | 1.09E-05 | 0.000142 |
| 211926_s_at | MYH9     | 0.004913 | 0.001859 | 0.011534 |
| 211932_at   | HNRNPA3  | 0.005657 | 1.64E-05 | 0.000203 |
| 211933_s_at | HNRNPA3  | 0.004433 | 0.000354 | 0.002899 |
| 211939_x_at | BTF3     | 0.005737 | 0.005204 | 0.026656 |
| 211941_s_at | PEBP1    | -0.01066 | 0.00551  | 0.027873 |
| 211942_x_at | RPL13A   | 0.014422 | 0.000643 | 0.004834 |
| 211945_s_at | ITGB1    | 0.006224 | 6.24E-05 | 0.000661 |
| 211950_at   | UBR4     | -0.00547 | 0.005337 | 0.027205 |
| 211962_s_at | ZFP36L1  | 0.008787 | 2.52E-09 | 9.15E-08 |
| 211963_s_at | ARPC5    | 0.009841 | 0.000104 | 0.001023 |
| 211965_at   | ZFP36L1  | 0.006148 | 0.002163 | 0.013038 |
| 211967_at   | TMEM123  | 0.00972  | 0.000113 | 0.001095 |
| 211970_x_at | ACTG1    | 0.003745 | 0.000241 | 0.002101 |
| 211971_s_at | LRPPRC   | -0.01059 | 4.13E-11 | 2.87E-09 |
| 211972_x_at | RPLP0    | 0.010802 | 0.004885 | 0.025385 |
| 211983_x_at | ACTG1    | 0.002751 | 0.003046 | 0.017293 |
| 211984_at   | CALM1    | -0.01034 | 0.0001   | 0.000996 |
| 211985_s_at | CALM1    | -0.00525 | 0.000409 | 0.003288 |
| 211986_at   | AHNAK    | 0.012703 | 7.73E-08 | 1.8E-06  |
| 211988_at   | SMARCE1  | 0.005233 | 0.002198 | 0.013208 |
| 211989_at   | SMARCE1  | 0.00736  | 4.64E-06 | 6.73E-05 |
| 211990_at   | HLA-DPA1 | 0.018075 | 0.000368 | 0.002995 |
| 211991_s_at | HLA-DPA1 | 0.025656 | 4.24E-08 | 1.06E-06 |
| 211995_x_at | ACTG1    | 0.007807 | 0.009731 | 0.043733 |
| 211999_at   | H3F3B    | 0.007319 | 4.33E-10 | 2.02E-08 |

|             |          |          |          |          |
|-------------|----------|----------|----------|----------|
| 212001_at   | SUGP2    | -0.00543 | 0.003259 | 0.018264 |
| 212012_at   | PXDN     | 0.01508  | 2.98E-06 | 4.56E-05 |
| 212013_at   | PXDN     | 0.008136 | 0.001954 | 0.012036 |
| 212014_x_at | CD44     | 0.020786 | 4.36E-09 | 1.44E-07 |
| 212017_at   | FAM168B  | -0.00686 | 0.001258 | 0.008338 |
| 212022_s_at | MKI67    | 0.012741 | 1.01E-05 | 0.000133 |
| 212027_at   | RBM25    | 0.00466  | 0.010181 | 0.045404 |
| 212036_s_at | PNN      | 0.00657  | 0.001589 | 0.010129 |
| 212038_s_at | VDAC1    | -0.00841 | 1.76E-06 | 2.85E-05 |
| 212044_s_at | RPL27A   | 0.009723 | 5.36E-05 | 0.000578 |
| 212051_at   | WIPF2    | -0.00649 | 0.002405 | 0.014255 |
| 212053_at   | PDXDC1   | -0.01002 | 2.22E-06 | 3.53E-05 |
| 212054_x_at | TBC1D9B  | -0.00451 | 0.004989 | 0.025826 |
| 212062_at   | ATP9A    | 0.007281 | 0.001131 | 0.00766  |
| 212063_at   | CD44     | 0.024141 | 9.07E-08 | 2.08E-06 |
| 212067_s_at | C1R      | 0.016677 | 2.07E-08 | 5.63E-07 |
| 212076_at   | MLL      | 0.007508 | 0.001708 | 0.010764 |
| 212078_s_at | MLL      | 0.006974 | 0.001666 | 0.010537 |
| 212079_s_at | MLL      | 0.007126 | 0.000534 | 0.004145 |
| 212082_s_at | MYL6     | 0.005208 | 0.001119 | 0.007603 |
| 212087_s_at | ERAL1    | -0.00675 | 0.000875 | 0.006255 |
| 212089_at   | LMNA     | 0.009953 | 0.000463 | 0.003667 |
| 212093_s_at | MTUS1    | -0.00675 | 0.000859 | 0.006153 |
| 212095_s_at | MTUS1    | -0.00761 | 0.01123  | 0.049015 |
| 212096_s_at | MTUS1    | -0.00635 | 0.002282 | 0.013651 |
| 212097_at   | CAV1     | 0.012048 | 6.76E-05 | 0.000706 |
| 212107_s_at | DHX9     | 0.005325 | 0.004869 | 0.025339 |
| 212110_at   | SLC39A14 | -0.01687 | 9.47E-08 | 2.16E-06 |
| 212121_at   | TCTN3    | -0.00745 | 0.002085 | 0.012672 |
| 212131_at   | LSM14A   | -0.0039  | 0.007951 | 0.037227 |
| 212137_at   | LARP1    | -0.00796 | 0.000409 | 0.003289 |
| 212146_at   | PLEKHM2  | -0.00568 | 0.007174 | 0.034473 |
| 212148_at   | PBX1     | -0.0065  | 0.011373 | 0.049482 |
| 212149_at   | EFR3A    | -0.00506 | 0.007661 | 0.036237 |
| 212155_at   | RNF187   | -0.00372 | 0.001474 | 0.009505 |
| 212166_at   | XPO7     | -0.00751 | 8.92E-07 | 1.59E-05 |
| 212171_x_at | VEGFA    | -0.01266 | 2.85E-07 | 5.76E-06 |
| 212173_at   | AK2      | -0.01044 | 6.49E-05 | 0.000682 |
| 212174_at   | AK2      | -0.01115 | 3.61E-06 | 5.4E-05  |
| 212175_s_at | AK2      | -0.0118  | 1.07E-09 | 4.3E-08  |
| 212183_at   | NUDT4    | -0.01321 | 0.000208 | 0.001847 |
| 212188_at   | KCTD12   | 0.008922 | 9.35E-06 | 0.000124 |
| 212191_x_at | RPL13    | 0.009841 | 0.009298 | 0.042151 |
| 212192_at   | KCTD12   | 0.010515 | 0.000197 | 0.001763 |
| 212193_s_at | LARP1    | -0.01033 | 0.007354 | 0.035088 |
| 212202_s_at | TMEM87A  | 0.006417 | 0.005874 | 0.029289 |
| 212203_x_at | IFITM3   | 0.023187 | 3.32E-09 | 1.14E-07 |
| 212204_at   | TMEM87A  | 0.007048 | 0.001597 | 0.010171 |
| 212213_x_at | OPA1     | -0.00664 | 0.004215 | 0.022562 |

|             |          |          |          |          |
|-------------|----------|----------|----------|----------|
| 212214_at   | OPA1     | -0.00532 | 0.008232 | 0.038302 |
| 212216_at   | PREPL    | -0.00866 | 2.75E-06 | 4.25E-05 |
| 212218_s_at | FASN     | 0.005833 | 0.002568 | 0.015029 |
| 212226_s_at | PPAP2B   | -0.01285 | 0.000198 | 0.001773 |
| 212228_s_at | COQ9     | -0.01034 | 2.84E-05 | 0.000331 |
| 212229_s_at | FBXO21   | -0.01229 | 5.56E-06 | 7.93E-05 |
| 212230_at   | PPAP2B   | -0.01163 | 2.95E-10 | 1.48E-08 |
| 212231_at   | FBXO21   | -0.01315 | 2.08E-10 | 1.11E-08 |
| 212234_at   | ASXL1    | -0.00527 | 0.001777 | 0.011116 |
| 212236_x_at | KRT17    | 0.006585 | 0.002003 | 0.012278 |
| 212242_at   | TUBA4A   | -0.00718 | 4.29E-06 | 6.31E-05 |
| 212252_at   | CAMKK2   | -0.00691 | 0.002468 | 0.014544 |
| 212265_at   | QKI      | 0.003925 | 0.011149 | 0.048774 |
| 212267_at   | WAPAL    | -0.00469 | 0.000942 | 0.006628 |
| 212270_x_at | RPL17    | 0.005361 | 0.002699 | 0.015652 |
| 212271_at   | MAPK1    | -0.00548 | 0.008488 | 0.039182 |
| 212277_at   | MTMR4    | -0.01049 | 0.000546 | 0.004215 |
| 212283_at   | AGRN     | 0.005173 | 0.00278  | 0.016018 |
| 212285_s_at | AGRN     | 0.0096   | 0.00022  | 0.001946 |
| 212297_at   | ATP13A3  | -0.00667 | 0.00233  | 0.013868 |
| 212310_at   | MIA3     | -0.006   | 0.006206 | 0.030595 |
| 212312_at   | BCL2L1   | -0.00663 | 0.000187 | 0.001685 |
| 212313_at   | CHMP7    | -0.00383 | 0.011197 | 0.048936 |
| 212314_at   | SEL1L3   | 0.009829 | 0.008557 | 0.03945  |
| 212320_at   | TUBB     | 0.011618 | 3.42E-05 | 0.000392 |
| 212326_at   | VPS13D   | -0.00576 | 0.003681 | 0.02019  |
| 212333_at   | FAM98A   | -0.00568 | 0.000996 | 0.00692  |
| 212334_at   | GNS      | -0.00807 | 3.9E-05  | 0.00044  |
| 212335_at   | GNS      | -0.00829 | 0.000896 | 0.006376 |
| 212338_at   | MYO1D    | 0.006848 | 0.008129 | 0.037909 |
| 212350_at   | TBC1D1   | -0.00771 | 0.001086 | 0.007427 |
| 212352_s_at | TMED10   | 0.004905 | 0.001947 | 0.011999 |
| 212354_at   | SULF1    | 0.008006 | 0.009127 | 0.041581 |
| 212359_s_at | KIAA0913 | -0.00798 | 1.58E-05 | 0.000196 |
| 212361_s_at | ATP2A2   | -0.00864 | 0.00491  | 0.025497 |
| 212363_x_at | ACTG1    | 0.007778 | 0.000656 | 0.004925 |
| 212369_at   | ZNF384   | -0.00492 | 0.002447 | 0.01445  |
| 212382_at   | TCF4     | 0.018218 | 1.74E-08 | 4.81E-07 |
| 212383_at   | ATP6V0A1 | -0.00541 | 0.009196 | 0.041801 |
| 212386_at   | TCF4     | 0.012524 | 6.98E-07 | 1.27E-05 |
| 212387_at   | TCF4     | 0.013697 | 7.1E-08  | 1.66E-06 |
| 212391_x_at | RPS3A    | 0.006873 | 9.9E-07  | 1.74E-05 |
| 212394_at   | KIAA0090 | -0.00822 | 0.005831 | 0.029113 |
| 212395_s_at | KIAA0090 | -0.0038  | 0.011243 | 0.049064 |
| 212397_at   | RDX      | -0.00814 | 0.000729 | 0.005365 |
| 212401_s_at | CDK11A   | 0.005846 | 0.007349 | 0.03507  |
| 212405_s_at | METT13   | -0.00584 | 0.005938 | 0.029568 |
| 212415_at   | SEPT6    | 0.009692 | 0.000375 | 0.003047 |
| 212419_at   | ZCCHC24  | 0.008381 | 0.000913 | 0.006473 |

|             |          |          |          |          |
|-------------|----------|----------|----------|----------|
| 212420_at   | ELF1     | 0.008285 | 0.000229 | 0.002012 |
| 212423_at   | ZCCHC24  | 0.004434 | 0.010244 | 0.045613 |
| 212428_at   | KIAA0368 | -0.00413 | 0.009872 | 0.044282 |
| 212432_at   | GRPEL1   | -0.01472 | 6.1E-11  | 3.96E-09 |
| 212433_x_at | RPS2     | 0.010102 | 0.002073 | 0.012623 |
| 212434_at   | GRPEL1   | -0.01771 | 2.31E-14 | 4.99E-12 |
| 212441_at   | KIAA0232 | -0.00547 | 0.003933 | 0.021292 |
| 212444_at   |          | 0.012644 | 0.003281 | 0.018373 |
| 212445_s_at | NEDD4L   | -0.00915 | 3.42E-05 | 0.000392 |
| 212448_at   | NEDD4L   | -0.01231 | 7.22E-07 | 1.31E-05 |
| 212456_at   | KIAA0664 | -0.01133 | 1.09E-12 | 1.35E-10 |
| 212459_x_at | SUCLG2   | -0.01633 | 7.74E-12 | 7.13E-10 |
| 212464_s_at | FN1      | 0.012705 | 0.000149 | 0.001398 |
| 212465_at   | SETD3    | -0.0096  | 5.35E-10 | 2.4E-08  |
| 212467_at   | DNAJC13  | -0.00911 | 0.002701 | 0.015655 |
| 212468_at   | SPAG9    | -0.00957 | 7.25E-07 | 1.31E-05 |
| 212470_at   | SPAG9    | -0.01196 | 1.5E-09  | 5.78E-08 |
| 212472_at   | MICAL2   | 0.009226 | 0.00046  | 0.003642 |
| 212473_s_at | MICAL2   | 0.010246 | 0.000635 | 0.004789 |
| 212481_s_at | TPM4     | 0.009554 | 4.06E-06 | 6.01E-05 |
| 212482_at   | RMND5A   | -0.00721 | 0.000137 | 0.001294 |
| 212484_at   | FAM89B   | 0.004879 | 0.008446 | 0.039069 |
| 212489_at   | COL5A1   | 0.011355 | 9.44E-05 | 0.000943 |
| 212498_at   |          | -0.0067  | 0.000166 | 0.001525 |
| 212503_s_at | DIP2C    | -0.01764 | 2.51E-10 | 1.29E-08 |
| 212504_at   | DIP2C    | -0.02066 | 5.15E-07 | 9.74E-06 |
| 212506_at   | PICALM   | -0.00273 | 0.006375 | 0.031286 |
| 212509_s_at | MXRA7    | 0.007461 | 0.000843 | 0.006047 |
| 212510_at   | GPD1L    | -0.01208 | 1.47E-10 | 8.34E-09 |
| 212511_at   | PICALM   | -0.00799 | 0.008252 | 0.038371 |
| 212517_at   | ATRN     | -0.00922 | 0.000338 | 0.002789 |
| 212519_at   | UBE2E1   | 0.004799 | 0.004226 | 0.022603 |
| 212521_s_at | PDE8A    | -0.00818 | 0.000457 | 0.003617 |
| 212522_at   | PDE8A    | -0.00852 | 3.75E-06 | 5.59E-05 |
| 212530_at   | NEK7     | 0.006027 | 0.005264 | 0.026896 |
| 212531_at   | LCN2     | 0.022484 | 1.02E-08 | 3.04E-07 |
| 212537_x_at | RPL17    | 0.005241 | 0.003702 | 0.020271 |
| 212543_at   | AIM1     | -0.00803 | 0.000105 | 0.001029 |
| 212552_at   | HPCAL1   | -0.00612 | 0.000134 | 0.001273 |
| 212558_at   | SPRY1    | 0.0157   | 8.07E-07 | 1.45E-05 |
| 212559_at   | PRKAR1B  | -0.00481 | 0.003463 | 0.019202 |
| 212568_s_at | DLAT     | -0.01474 | 8.16E-10 | 3.46E-08 |
| 212569_at   | SMCHD1   | 0.007635 | 0.001267 | 0.008377 |
| 212577_at   | SMCHD1   | 0.006906 | 0.004364 | 0.023175 |
| 212581_x_at | GAPDH    | -0.00674 | 0.00976  | 0.043836 |
| 212582_at   | OSBPL8   | -0.00842 | 9.39E-06 | 0.000125 |
| 212585_at   | OSBPL8   | -0.00862 | 0.000337 | 0.002783 |
| 212587_s_at | PTPRC    | 0.028608 | 1.25E-09 | 4.96E-08 |
| 212588_at   | PTPRC    | 0.024517 | 2.18E-10 | 1.16E-08 |



|             |              |          |          |          |
|-------------|--------------|----------|----------|----------|
| 212590_at   | RRAS2        | -0.00746 | 0.00122  | 0.008142 |
| 212592_at   | IGJ          | 0.042488 | 2.49E-10 | 1.29E-08 |
| 212593_s_at | PDCD4        | 0.007558 | 1.37E-05 | 0.000174 |
| 212599_at   | AUTS2        | -0.01116 | 6.55E-06 | 9.16E-05 |
| 212600_s_at | UQCRC2       | -0.00699 | 0.000347 | 0.002845 |
| 212602_at   | WDFY3        | -0.00554 | 0.000711 | 0.005258 |
| 212609_s_at | AKT3         | 0.007079 | 0.000116 | 0.001124 |
| 212611_at   | DTX4         | -0.00558 | 0.010826 | 0.047711 |
| 212613_at   | BTN3A2       | 0.010973 | 3.69E-05 | 0.000419 |
| 212622_at   | TMEM41B      | -0.00717 | 0.001319 | 0.008675 |
| 212624_s_at | CHN1         | 0.009191 | 0.000469 | 0.003705 |
| 212631_at   | STX7         | -0.00274 | 0.008135 | 0.037927 |
| 212636_at   | QKI          | 0.007329 | 0.002502 | 0.014704 |
| 212639_x_at | TUBA1B       | 0.00928  | 0.000776 | 0.00564  |
| 212644_s_at | MAPK1IP1L    | -0.00311 | 0.004083 | 0.021948 |
| 212646_at   | RFTN1        | 0.011649 | 1.16E-07 | 2.59E-06 |
| 212647_at   | RRAS         | 0.012705 | 1.33E-07 | 2.92E-06 |
| 212648_at   | DHX29        | -0.00928 | 8.46E-05 | 0.000857 |
| 212650_at   | EHBP1        | -0.00412 | 0.002661 | 0.015489 |
| 212651_at   | RHOBTB1      | -0.01315 | 8.33E-06 | 0.000113 |
| 212652_s_at | SNX4         | -0.00655 | 0.000332 | 0.00275  |
| 212653_s_at | EHBP1        | -0.00588 | 0.004243 | 0.022669 |
| 212654_at   | TPM2         | 0.006259 | 0.003325 | 0.01858  |
| 212655_at   | ZCCHC14      | -0.00719 | 0.005702 | 0.028604 |
| 212656_at   | TSFM         | -0.01227 | 2.32E-10 | 1.21E-08 |
| 212657_s_at | IL1RN        | 0.008959 | 0.000563 | 0.004317 |
| 212667_at   | SPARC        | 0.007423 | 0.001963 | 0.012084 |
| 212669_at   | CAMK2G       | -0.01357 | 5.93E-06 | 8.38E-05 |
| 212671_s_at | HLA-DQA1     | 0.031516 | 8.2E-08  | 1.9E-06  |
| 212681_at   | EPB41L3      | -0.01669 | 2.77E-09 | 9.94E-08 |
| 212683_at   | SLC25A44     | -0.01069 | 3.1E-08  | 8.02E-07 |
| 212688_at   | PIK3CB       | -0.0057  | 1.94E-06 | 3.12E-05 |
| 212692_s_at | LRBA         | -0.00607 | 0.002813 | 0.016174 |
| 212693_at   | MDN1         | -0.00551 | 0.01105  | 0.048448 |
| 212694_s_at | PCCB         | -0.01401 | 0.000466 | 0.003686 |
| 212695_at   | CRY2         | -0.00867 | 0.000715 | 0.005283 |
| 212699_at   | SCAMP5       | -0.00564 | 0.001013 | 0.007013 |
| 212700_x_at | LOC100291232 | -0.00483 | 0.000915 | 0.006485 |
| 212701_at   | TLN2         | -0.02577 | 1.62E-12 | 1.88E-10 |
| 212703_at   | TLN2         | -0.02328 | 1.9E-14  | 4.6E-12  |
| 212705_x_at | PNPLA2       | -0.00456 | 0.006235 | 0.030711 |
| 212706_at   | RASA4        | -0.0113  | 4.35E-05 | 0.000482 |
| 212713_at   | MFAP4        | 0.0164   | 1.2E-05  | 0.000154 |
| 212714_at   | LARP4        | -0.0134  | 2E-11    | 1.57E-09 |
| 212715_s_at | MICAL3       | -0.0074  | 0.003002 | 0.017074 |
| 212724_at   | RND3         | 0.010447 | 0.000127 | 0.001216 |
| 212731_at   | ANKRD46      | -0.01217 | 4.56E-06 | 6.64E-05 |
| 212734_x_at | RPL13        | 0.007437 | 0.008998 | 0.04105  |
| 212737_at   | GM2A         | 0.008086 | 0.003133 | 0.017676 |

|             |          |          |          |          |
|-------------|----------|----------|----------|----------|
| 212741_at   | MAOA     | -0.02101 | 1.06E-15 | 5.12E-13 |
| 212743_at   | RCHY1    | -0.00482 | 0.005339 | 0.027205 |
| 212748_at   | MKL1     | 0.005054 | 0.006486 | 0.031713 |
| 212750_at   | PPP1R16B | -0.03209 | 2.74E-14 | 5.76E-12 |
| 212757_s_at | CAMK2G   | -0.01087 | 0.000171 | 0.001567 |
| 212758_s_at | ZEB1     | 0.00585  | 0.007348 | 0.03507  |
| 212760_at   | UBR2     | -0.00702 | 0.003848 | 0.020899 |
| 212779_at   | KIAA1109 | -0.00649 | 0.011332 | 0.049336 |
| 212788_x_at | FTL      | -0.00721 | 0.000551 | 0.004243 |
| 212790_x_at | RPL13A   | 0.008174 | 0.000662 | 0.004966 |
| 212791_at   | C1orf216 | 0.00871  | 5.25E-06 | 7.51E-05 |
| 212796_s_at | TBC1D2B  | 0.008349 | 0.000152 | 0.001419 |
| 212800_at   | STX6     | 0.005263 | 0.001236 | 0.008234 |
| 212802_s_at | GAPVD1   | -0.00548 | 0.001638 | 0.010373 |
| 212804_s_at | GAPVD1   | -0.00527 | 0.00664  | 0.032291 |
| 212805_at   | PRUNE2   | -0.01231 | 1.46E-06 | 2.42E-05 |
| 212806_at   | PRUNE2   | -0.01613 | 3.36E-07 | 6.68E-06 |
| 212811_x_at | SLC1A4   | 0.00658  | 0.002631 | 0.015347 |
| 212814_at   | AHCYL2   | -0.01163 | 2.02E-05 | 0.000245 |
| 212820_at   | DMXL2    | -0.00827 | 0.0063   | 0.030989 |
| 212821_at   | PLEKHG3  | 0.005149 | 0.007331 | 0.035028 |
| 212827_at   | IGHM     | 0.017965 | 5.29E-06 | 7.57E-05 |
| 212833_at   | SLC25A46 | -0.00851 | 5.21E-05 | 0.000563 |
| 212836_at   | POLD3    | -0.01231 | 8.71E-07 | 1.55E-05 |
| 212841_s_at | PPFIBP2  | -0.00766 | 0.001954 | 0.012038 |
| 212844_at   | RRP1B    | 0.007337 | 9.05E-05 | 0.00091  |
| 212849_at   | AXIN1    | 0.004654 | 0.004615 | 0.024273 |
| 212850_s_at | LRP4     | -0.00675 | 0.005953 | 0.029617 |
| 212855_at   | DCUN1D4  | -0.00624 | 0.006463 | 0.031623 |
| 212857_x_at | SUB1     | 0.003723 | 0.001714 | 0.010789 |
| 212865_s_at | COL14A1  | 0.02413  | 1.22E-06 | 2.07E-05 |
| 212873_at   | HMHA1    | 0.012599 | 7.48E-06 | 0.000103 |
| 212874_at   | APOE     | -0.01879 | 7.72E-10 | 3.3E-08  |
| 212880_at   | WDR7     | -0.01062 | 0.000559 | 0.004294 |
| 212883_at   | APOE     | -0.03168 | 1.08E-10 | 6.44E-09 |
| 212884_x_at | APOE     | -0.01534 | 5.22E-07 | 9.85E-06 |
| 212886_at   | CCDC69   | 0.006529 | 0.000602 | 0.004567 |
| 212890_at   | SLC38A10 | -0.00808 | 0.000677 | 0.005044 |
| 212894_at   | SUPV3L1  | -0.00937 | 1.47E-05 | 0.000185 |
| 212899_at   | CDK19    | 0.005771 | 0.002032 | 0.012417 |
| 212906_at   | GRAMD1B  | -0.01951 | 4.01E-11 | 2.81E-09 |
| 212907_at   | SLC30A1  | -0.00711 | 0.000706 | 0.005229 |
| 212908_at   | DNAJC16  | -0.02798 | 3.83E-10 | 1.83E-08 |
| 212911_at   | DNAJC16  | -0.01551 | 2.27E-10 | 1.2E-08  |
| 212915_at   | PDZRN3   | -0.00787 | 0.001549 | 0.0099   |
| 212922_s_at | SMYD2    | 0.005615 | 0.006122 | 0.030251 |
| 212925_at   | C19orf21 | -0.00502 | 0.007802 | 0.036739 |
| 212928_at   | TSPYL4   | -0.00647 | 0.005298 | 0.027044 |
| 212935_at   | MCF2L    | -0.00627 | 0.000187 | 0.001685 |

|             |           |          |          |          |
|-------------|-----------|----------|----------|----------|
| 212944_at   | SLC5A3    | -0.00685 | 0.009829 | 0.04411  |
| 212946_at   | KIAA0564  | -0.01296 | 9.66E-07 | 1.71E-05 |
| 212950_at   | GPR116    | -0.01219 | 1.12E-05 | 0.000145 |
| 212951_at   | GPR116    | -0.00979 | 0.002911 | 0.016643 |
| 212959_s_at | GNPTAB    | 0.006147 | 0.008727 | 0.040044 |
| 212967_x_at | NAP1L1    | 0.008406 | 3.82E-08 | 9.64E-07 |
| 212977_at   | CXCR7     | -0.00778 | 0.007281 | 0.03486  |
| 212988_x_at | ACTG1     | 0.004266 | 0.000179 | 0.001633 |
| 212992_at   | AHNAK2    | 0.011839 | 7.86E-08 | 1.83E-06 |
| 212993_at   | NACC2     | -0.009   | 5.84E-06 | 8.28E-05 |
| 212998_x_at | HLA-DQB1  | 0.020898 | 4.36E-07 | 8.41E-06 |
| 213002_at   | MARCKS    | 0.016642 | 3.13E-09 | 1.09E-07 |
| 213005_s_at | KANK1     | -0.0093  | 6.34E-05 | 0.00067  |
| 213006_at   | CEBPD     | -0.01273 | 0.001512 | 0.009704 |
| 213008_at   | FANCI     | 0.006205 | 0.000737 | 0.005416 |
| 213010_at   | PRKCDBP   | 0.006288 | 0.001612 | 0.010242 |
| 213012_at   | NEDD4     | -0.00545 | 0.005379 | 0.027369 |
| 213018_at   | GATAD1    | -0.00641 | 0.002949 | 0.016819 |
| 213021_at   | GOSR1     | -0.00564 | 0.001466 | 0.009462 |
| 213022_s_at | UTRN      | 0.010575 | 0.00217  | 0.013074 |
| 213023_at   | UTRN      | 0.009364 | 0.001973 | 0.012134 |
| 213028_at   | NFRKB     | -0.0053  | 0.00299  | 0.017024 |
| 213029_at   | NFIB      | -0.00737 | 0.000285 | 0.00241  |
| 213032_at   | NFIB      | -0.00851 | 0.001247 | 0.008283 |
| 213033_s_at | NFIB      | -0.00838 | 5.41E-05 | 0.000583 |
| 213034_at   | SIK3      | -0.00677 | 0.000674 | 0.005032 |
| 213036_x_at | ATP2A3    | 0.007753 | 0.00025  | 0.002163 |
| 213037_x_at | STAU1     | -0.01167 | 5.23E-11 | 3.52E-09 |
| 213038_at   | RNF19B    | -0.00613 | 0.003494 | 0.019338 |
| 213040_s_at | NPTXR     | 0.006264 | 0.00361  | 0.019881 |
| 213045_at   | MAST3     | -0.00993 | 1.18E-05 | 0.000152 |
| 213050_at   | COBL      | -0.00608 | 0.001317 | 0.00867  |
| 213055_at   | CD47      | 0.01031  | 0.000941 | 0.006628 |
| 213063_at   | ZC3H14    | -0.00738 | 0.00034  | 0.002799 |
| 213066_at   | RUSC2     | -0.00524 | 0.003204 | 0.018014 |
| 213071_at   | DPT       | 0.013244 | 0.000773 | 0.005622 |
| 213077_at   | YTHDC2    | -0.00687 | 0.009757 | 0.043829 |
| 213080_x_at | RPL5      | 0.002994 | 0.001338 | 0.008793 |
| 213084_x_at | RPL23A    | 0.003437 | 0.005863 | 0.029244 |
| 213085_s_at | WWC1      | -0.00462 | 0.002713 | 0.015705 |
| 213088_s_at | DNAJC9    | 0.004942 | 0.008072 | 0.0377   |
| 213093_at   | PRKCA     | -0.0048  | 0.009938 | 0.044482 |
| 213095_x_at | AIF1      | 0.01183  | 0.00027  | 0.002304 |
| 213101_s_at | ACTR3     | 0.006884 | 5.18E-05 | 0.000561 |
| 213113_s_at | SLC43A3   | 0.012136 | 1.57E-08 | 4.43E-07 |
| 213115_at   | ATG4A     | -0.01093 | 0.000277 | 0.002358 |
| 213118_at   | UHRF1BP1L | -0.00553 | 0.009389 | 0.042478 |
| 213119_at   | SLC36A1   | -0.01057 | 4.87E-06 | 7.02E-05 |
| 213127_s_at | MED8      | -0.0061  | 0.004576 | 0.024096 |

|             |          |          |          |          |
|-------------|----------|----------|----------|----------|
| 213128_s_at | UBE3A    | -0.00648 | 0.007262 | 0.034788 |
| 213129_s_at | GCSH     | -0.01053 | 1.78E-07 | 3.79E-06 |
| 213132_s_at | MCAT     | -0.00857 | 0.000844 | 0.00605  |
| 213133_s_at | GCSH     | -0.01168 | 3.59E-10 | 1.74E-08 |
| 213136_at   | PTPN2    | 0.008504 | 0.000118 | 0.001139 |
| 213137_s_at | PTPN2    | 0.007894 | 2.91E-05 | 0.00034  |
| 213140_s_at | SS18L1   | -0.01433 | 2.12E-10 | 1.13E-08 |
| 213141_at   | PSKH1    | -0.00517 | 0.004739 | 0.024793 |
| 213143_at   | C2orf72  | -0.00589 | 0.001102 | 0.007505 |
| 213149_at   | DLAT     | -0.0111  | 1.89E-06 | 3.05E-05 |
| 213151_s_at | SEPT7    | 0.007732 | 0.000121 | 0.001164 |
| 213160_at   | DOCK2    | 0.008056 | 0.000205 | 0.001823 |
| 213169_at   | SEMA5A   | -0.01184 | 0.000695 | 0.005164 |
| 213171_s_at | MMP24    | -0.00634 | 0.001265 | 0.008371 |
| 213174_at   | TTC9     | 0.005717 | 0.0083   | 0.038527 |
| 213176_s_at | LTBP4    | 0.006785 | 0.000221 | 0.001947 |
| 213180_s_at | GOSR2    | -0.01025 | 0.00036  | 0.002947 |
| 213181_s_at | MOCS1    | -0.01058 | 6.77E-07 | 1.24E-05 |
| 213184_at   | SENP5    | -0.00577 | 0.002996 | 0.017057 |
| 213186_at   | DZIP3    | -0.00618 | 0.000637 | 0.004794 |
| 213193_x_at | TRBC1    | 0.040403 | 3.36E-14 | 6.73E-12 |
| 213194_at   | ROBO1    | 0.010156 | 0.001284 | 0.008473 |
| 213198_at   | ACVR1B   | -0.00656 | 0.002189 | 0.013161 |
| 213206_at   | GOSR2    | -0.0099  | 0.00041  | 0.003293 |
| 213210_at   | TAF6L    | -0.0062  | 0.002774 | 0.016003 |
| 213214_x_at | ACTG1    | 0.002134 | 0.007425 | 0.035386 |
| 213221_s_at | SIK2     | -0.00867 | 6.88E-07 | 1.26E-05 |
| 213222_at   | PLCB1    | 0.009809 | 0.005263 | 0.026896 |
| 213227_at   | PGRMC2   | -0.01015 | 4.01E-05 | 0.000451 |
| 213234_at   | KIAA1467 | -0.0078  | 0.003722 | 0.02037  |
| 213235_at   | C16orf88 | 0.004994 | 0.007609 | 0.036058 |
| 213247_at   | SVEP1    | 0.014618 | 1.73E-05 | 0.000214 |
| 213261_at   | TRANK1   | 0.00511  | 0.011376 | 0.049482 |
| 213262_at   | SACS     | 0.012708 | 6.14E-05 | 0.000652 |
| 213263_s_at | PCBP2    | -0.01128 | 0.000739 | 0.005426 |
| 213264_at   | PCBP2    | -0.01255 | 1.73E-11 | 1.39E-09 |
| 213274_s_at | CTSB     | -0.01714 | 2.97E-07 | 5.99E-06 |
| 213275_x_at | CTSB     | -0.01168 | 1.03E-08 | 3.07E-07 |
| 213278_at   | MTMR9    | -0.00672 | 0.009355 | 0.042356 |
| 213279_at   | DHRS1    | -0.0059  | 0.00605  | 0.030001 |
| 213281_at   | JUN      | 0.009279 | 0.001549 | 0.0099   |
| 213282_at   | APOOL    | -0.00902 | 1.13E-06 | 1.95E-05 |
| 213289_at   | APOOL    | -0.01453 | 2.34E-05 | 0.000278 |
| 213293_s_at | TRIM22   | 0.019792 | 6.75E-09 | 2.15E-07 |
| 213304_at   | FAM179B  | -0.00998 | 0.001084 | 0.007424 |
| 213306_at   | MPDZ     | -0.01023 | 9.94E-05 | 0.000987 |
| 213308_at   | SHANK2   | -0.00663 | 0.001165 | 0.007843 |
| 213309_at   | PLCL2    | -0.00647 | 0.001778 | 0.011117 |
| 213311_s_at | TCF25    | 0.005768 | 0.009847 | 0.04418  |

|             |          |          |          |          |
|-------------|----------|----------|----------|----------|
| 213317_at   | CLIC5    | -0.01493 | 0.003239 | 0.018168 |
| 213319_s_at | CSDA     | 0.008623 | 0.006817 | 0.032997 |
| 213321_at   | BCKDHB   | -0.00786 | 0.000146 | 0.001365 |
| 213325_at   | PVRL3    | -0.00798 | 0.001171 | 0.007876 |
| 213326_at   | VAMP1    | 0.007384 | 0.010365 | 0.04606  |
| 213332_at   | PAPPA2   | 0.023947 | 6.01E-10 | 2.64E-08 |
| 213333_at   | MDH2     | -0.00821 | 7.92E-05 | 0.000809 |
| 213335_s_at | ST3GAL6  | -0.00466 | 0.009034 | 0.041196 |
| 213345_at   | NFATC4   | 0.005468 | 0.009253 | 0.042007 |
| 213346_at   | C13orf27 | -0.00625 | 0.00086  | 0.006155 |
| 213347_x_at | RPS4X    | 0.001952 | 0.003933 | 0.021292 |
| 213350_at   | RPS11    | 0.007335 | 0.006064 | 0.030048 |
| 213355_at   | ST3GAL6  | -0.00928 | 0.000267 | 0.002285 |
| 213357_at   | GTF2H5   | -0.00617 | 0.001895 | 0.011726 |
| 213362_at   | PTPRD    | -0.01041 | 1.6E-06  | 2.62E-05 |
| 213364_s_at | SNX1     | -0.0068  | 0.00865  | 0.039764 |
| 213365_at   | ERI2     | -0.01248 | 8.22E-09 | 2.52E-07 |
| 213366_x_at | ATP5C1   | -0.00606 | 3.1E-05  | 0.000358 |
| 213374_x_at | HIBCH    | -0.021   | 6.9E-17  | 7.32E-14 |
| 213377_x_at | RPS12    | 0.011089 | 2.23E-08 | 6E-07    |
| 213381_at   | C10orf72 | -0.01893 | 2.43E-06 | 3.81E-05 |
| 213383_at   | SBF1     | -0.01097 | 2.45E-07 | 5.05E-06 |
| 213385_at   | CHN2     | -0.00836 | 0.002267 | 0.013576 |
| 213392_at   | IQCK     | -0.00552 | 0.00969  | 0.043601 |
| 213393_at   | MFSD9    | -0.00625 | 0.000677 | 0.005044 |
| 213400_s_at | TBL1X    | -0.0052  | 0.005385 | 0.027394 |
| 213403_at   |          | -0.00768 | 0.003002 | 0.017074 |
| 213407_at   | PHLPP2   | -0.00996 | 0.000122 | 0.001173 |
| 213408_s_at | PI4KA    | -0.00711 | 2.18E-05 | 0.000261 |
| 213412_at   | TJP3     | 0.00428  | 0.005679 | 0.028511 |
| 213414_s_at | RPS19    | 0.016832 | 0.000253 | 0.002192 |
| 213418_at   | HSPA6    | 0.016156 | 0.000469 | 0.003702 |
| 213422_s_at | MXRA8    | 0.004958 | 0.008387 | 0.038858 |
| 213423_x_at | TUSC3    | 0.008493 | 0.002221 | 0.013335 |
| 213424_at   | KIAA0895 | -0.00684 | 0.00333  | 0.018603 |
| 213426_s_at | CAV2     | 0.004583 | 0.008621 | 0.039655 |
| 213430_at   | RUFY3    | -0.0081  | 7.87E-05 | 0.000805 |
| 213433_at   | ARL3     | -0.00598 | 0.008105 | 0.037807 |
| 213437_at   | RUFY3    | -0.00897 | 0.005317 | 0.027122 |
| 213440_at   | RAB1A    | -0.00907 | 5.68E-10 | 2.53E-08 |
| 213448_at   |          | -0.00771 | 0.00937  | 0.042408 |
| 213451_x_at | TNXA     | 0.00708  | 0.004189 | 0.022445 |
| 213454_at   | APITD1   | -0.01237 | 4.15E-09 | 1.39E-07 |
| 213457_at   | MFHAS1   | 0.010039 | 0.000117 | 0.001133 |
| 213470_s_at | HNRNPH1  | 0.005718 | 0.009516 | 0.042925 |
| 213475_s_at | ITGAL    | 0.010752 | 3.24E-05 | 0.000373 |
| 213483_at   | PPWD1    | 0.005021 | 0.005738 | 0.02872  |
| 213488_at   | SNED1    | 0.00983  | 0.000153 | 0.001423 |
| 213500_at   |          | -0.00517 | 0.007898 | 0.037034 |

|             |               |          |          |          |
|-------------|---------------|----------|----------|----------|
| 213501_at   | ACOX1         | -0.01545 | 3.14E-09 | 1.09E-07 |
| 213502_x_at | LOC91316      | 0.012368 | 0.00012  | 0.001154 |
| 213503_x_at | ANXA2         | 0.017138 | 2.81E-10 | 1.41E-08 |
| 213504_at   | COPS6         | -0.01125 | 4.89E-07 | 9.3E-06  |
| 213508_at   | C14orf147     | -0.006   | 0.004926 | 0.025569 |
| 213509_x_at | CES2          | -0.02245 | 1.8E-08  | 4.97E-07 |
| 213511_s_at | MTMR1         | -0.00579 | 0.005431 | 0.027568 |
| 213513_x_at | ARPC2         | 0.00528  | 4.68E-05 | 0.000514 |
| 213519_s_at | LAMA2         | 0.006783 | 0.010099 | 0.045113 |
| 213524_s_at | G0S2          | -0.01191 | 6.75E-09 | 2.15E-07 |
| 213534_s_at | PASK          | 0.004093 | 0.009916 | 0.044432 |
| 213535_s_at | UBE2I         | 0.005343 | 8.96E-05 | 0.000902 |
| 213537_at   | HLA-DPA1      | 0.011958 | 0.001828 | 0.011363 |
| 213539_at   | CD3D          | 0.023339 | 3.62E-10 | 1.75E-08 |
| 213540_at   | HSD17B8       | -0.00726 | 0.007939 | 0.037192 |
| 213541_s_at | ERG           | 0.007163 | 0.005567 | 0.028103 |
| 213544_at   | ING2          | -0.00591 | 0.001198 | 0.008029 |
| 213546_at   | DKFZP586I1420 | -0.00763 | 0.002095 | 0.01272  |
| 213549_at   | PDZD8         | -0.01198 | 0.000104 | 0.001027 |
| 213552_at   | GLCE          | -0.01071 | 1.18E-05 | 0.000153 |
| 213558_at   | PCLO          | -0.00918 | 0.002175 | 0.013097 |
| 213560_at   | GADD45B       | -0.00836 | 0.002635 | 0.015361 |
| 213563_s_at | TUBGCP2       | -0.00398 | 0.003846 | 0.020899 |
| 213564_x_at | LDHB          | -0.00578 | 4.01E-09 | 1.34E-07 |
| 213566_at   | RNASE6        | 0.025924 | 8.78E-12 | 7.89E-10 |
| 213572_s_at | SERPINB1      | 0.006458 | 0.011025 | 0.048367 |
| 213587_s_at | ATP6V0E2      | -0.01541 | 9.77E-09 | 2.92E-07 |
| 213590_at   | SLC16A5       | 0.009099 | 0.000944 | 0.006635 |
| 213591_at   | ALDH7A1       | -0.01363 | 1.96E-07 | 4.14E-06 |
| 213594_x_at | SRSF10        | 0.005473 | 0.011287 | 0.049216 |
| 213595_s_at | CDC42BPA      | -0.00704 | 0.011279 | 0.04919  |
| 213603_s_at | RAC2          | 0.02501  | 3.1E-13  | 4.54E-11 |
| 213616_at   | C18orf10      | 0.008846 | 0.000337 | 0.002779 |
| 213618_at   | ARAP2         | 0.008575 | 0.003672 | 0.020155 |
| 213620_s_at | ICAM2         | 0.006484 | 0.0046   | 0.024207 |
| 213624_at   | SMPDL3A       | -0.01897 | 4.02E-14 | 7.86E-12 |
| 213626_at   | CBR4          | -0.01139 | 4.14E-10 | 1.95E-08 |
| 213638_at   | PHACTR1       | 0.010463 | 0.008044 | 0.037586 |
| 213642_at   |               | 0.00656  | 9.58E-05 | 0.000956 |
| 213646_x_at | TUBA1B        | 0.007282 | 0.001804 | 0.011242 |
| 213651_at   | INPP5J        | -0.00601 | 0.002402 | 0.014253 |
| 213653_at   | METTL3        | 0.006561 | 0.001529 | 0.009786 |
| 213656_s_at | KLC1          | 0.006925 | 0.006069 | 0.030065 |
| 213657_s_at |               | -0.02402 | 8.26E-15 | 2.49E-12 |
| 213658_at   |               | -0.01632 | 3.43E-07 | 6.79E-06 |
| 213664_at   | SLC1A1        | -0.02275 | 2.06E-12 | 2.31E-10 |
| 213665_at   | SOX4          | 0.005646 | 0.001452 | 0.009392 |
| 213667_at   | SRCAP         | 0.00432  | 0.00077  | 0.005605 |
| 213674_x_at | IGHD          | 0.017974 | 7.01E-09 | 2.22E-07 |

|             |              |          |          |          |
|-------------|--------------|----------|----------|----------|
| 213686_at   | VPS13A       | -0.00907 | 0.000657 | 0.004933 |
| 213687_s_at | RPL35A       | 0.007344 | 1.08E-05 | 0.000141 |
| 213688_at   | CALM1        | -0.01058 | 0.008357 | 0.038737 |
| 213692_s_at | VDR          | -0.01392 | 1.38E-06 | 2.31E-05 |
| 213693_s_at | MUC1         | 0.014013 | 8.38E-06 | 0.000113 |
| 213695_at   | PON3         | -0.00841 | 0.004077 | 0.021926 |
| 213697_at   | HIPK3        | -0.00616 | 0.001266 | 0.008373 |
| 213702_x_at | ASAH1        | -0.0053  | 0.000166 | 0.001527 |
| 213703_at   | LOC150759    | 0.013462 | 3.61E-05 | 0.00041  |
| 213704_at   | RABGGTB      | -0.00989 | 0.000146 | 0.001368 |
| 213705_at   | LOC100509558 | -0.01176 | 1.72E-12 | 1.98E-10 |
| 213706_at   | GPD1         | -0.03076 | 2.26E-11 | 1.73E-09 |
| 213709_at   | BHLHB9       | -0.0081  | 0.00011  | 0.001074 |
| 213713_s_at | GLB1L2       | -0.0144  | 1.05E-05 | 0.000138 |
| 213714_at   | CACNB2       | -0.00759 | 0.002114 | 0.012799 |
| 213716_s_at | SECTM1       | 0.00715  | 0.006155 | 0.030401 |
| 213724_s_at | PDK2         | -0.02102 | 2.41E-09 | 8.8E-08  |
| 213728_at   | LAMP1        | -0.00636 | 0.000892 | 0.006356 |
| 213733_at   | MYO1F        | 0.006402 | 0.002731 | 0.015795 |
| 213734_at   | WSB2         | -0.00398 | 0.004783 | 0.024988 |
| 213735_s_at | COX5B        | -0.00567 | 0.002097 | 0.012724 |
| 213736_at   | COX5B        | -0.00634 | 0.002049 | 0.012511 |
| 213738_s_at | ATP5A1       | -0.00918 | 3.04E-09 | 1.07E-07 |
| 213739_at   |              | -0.00941 | 0.000853 | 0.006113 |
| 213748_at   | TRIM66       | -0.00575 | 0.003451 | 0.019157 |
| 213758_at   | COX4I1       | -0.00724 | 0.000593 | 0.004517 |
| 213759_at   | ARL4C        | 0.012553 | 7.72E-06 | 0.000105 |
| 213760_s_at | ZNF330       | -0.0064  | 0.000195 | 0.001749 |
| 213762_x_at | RBMX         | 0.003388 | 0.007128 | 0.034279 |
| 213763_at   | HIPK2        | -0.01077 | 0.004465 | 0.023615 |
| 213766_x_at | GNA11        | -0.00751 | 3.9E-05  | 0.00044  |
| 213787_s_at | EBP          | -0.01005 | 0.008488 | 0.039182 |
| 213789_at   |              | -0.01126 | 0.00884  | 0.040497 |
| 213792_s_at | INSR         | -0.01759 | 1.4E-09  | 5.45E-08 |
| 213793_s_at | HOMER1       | -0.00795 | 0.003235 | 0.018153 |
| 213797_at   | RSAD2        | 0.010728 | 0.000173 | 0.001588 |
| 213798_s_at | CAP1         | 0.003472 | 0.00517  | 0.026546 |
| 213800_at   | CFH          | 0.017759 | 9.49E-07 | 1.68E-05 |
| 213801_x_at | RPSA         | 0.008528 | 9.1E-08  | 2.09E-06 |
| 213813_x_at |              | -0.00757 | 5.7E-09  | 1.84E-07 |
| 213814_s_at | SNTB2        | -0.00586 | 0.009342 | 0.042306 |
| 213816_s_at | MET          | 0.012222 | 0.000376 | 0.003053 |
| 213823_at   | HOXA11       | 0.012394 | 5.92E-07 | 1.1E-05  |
| 213830_at   | TRD@         | 0.006997 | 0.002645 | 0.015402 |
| 213836_s_at | WIPI1        | -0.0121  | 1.19E-06 | 2.04E-05 |
| 213839_at   | CLMN         | -0.00996 | 2.28E-06 | 3.61E-05 |
| 213843_x_at | SLC6A8       | -0.01343 | 0.000889 | 0.00634  |
| 213846_at   | COX7C        | -0.00591 | 0.007471 | 0.035561 |
| 213851_at   | TMEM110      | -0.00769 | 0.00512  | 0.026367 |

|             |              |          |          |          |
|-------------|--------------|----------|----------|----------|
| 213857_s_at | CD47         | 0.012344 | 2.2E-07  | 4.59E-06 |
| 213859_x_at | SMARCA5      | 0.004424 | 0.001103 | 0.007509 |
| 213861_s_at | FAM119B      | -0.01673 | 2.67E-07 | 5.45E-06 |
| 213864_s_at | NAP1L1       | 0.008855 | 1.39E-10 | 8E-09    |
| 213869_x_at | THY1         | -0.02033 | 9.53E-10 | 3.94E-08 |
| 213874_at   | SERPINA4     | -0.00989 | 8.23E-05 | 0.000835 |
| 213878_at   | PYROXD1      | -0.00559 | 0.006137 | 0.030321 |
| 213879_at   |              | 0.004253 | 0.001549 | 0.0099   |
| 213881_x_at | SUMO2        | 0.005314 | 0.000288 | 0.002432 |
| 213889_at   |              | -0.01086 | 0.001427 | 0.009255 |
| 213890_x_at | RPS16        | 0.003922 | 0.001135 | 0.007682 |
| 213891_s_at | TCF4         | 0.012995 | 0.000159 | 0.001477 |
| 213896_x_at | FAM149B1     | -0.00688 | 0.003217 | 0.018083 |
| 213906_at   | MYBL1        | 0.007168 | 0.003679 | 0.02018  |
| 213915_at   | NKG7         | 0.01105  | 6.19E-07 | 1.15E-05 |
| 213921_at   | SST          | 0.010356 | 0.000172 | 0.001579 |
| 213923_at   | RAP2B        | 0.013261 | 3.17E-07 | 6.34E-06 |
| 213932_x_at | HLA-A        | 0.004259 | 0.000433 | 0.003459 |
| 213933_at   | PTGER3       | -0.02471 | 2.17E-16 | 1.54E-13 |
| 213940_s_at | FNBP1        | 0.007797 | 4.61E-07 | 8.83E-06 |
| 213944_x_at | GNA11        | -0.00477 | 0.00318  | 0.01791  |
| 213948_x_at | CADM3        | 0.004839 | 0.006899 | 0.033333 |
| 213951_s_at | PSMC3IP      | -0.00362 | 0.006021 | 0.029882 |
| 213952_s_at | ALOX5        | 0.006152 | 0.004408 | 0.023362 |
| 213958_at   | CD6          | 0.007003 | 0.007362 | 0.035121 |
| 213964_x_at |              | -0.00619 | 0.000506 | 0.003956 |
| 213967_at   | RALYL        | -0.02761 | 9.64E-11 | 5.94E-09 |
| 213970_at   | RABL3        | -0.00805 | 0.003233 | 0.018153 |
| 213974_at   | ADAMTSL3     | 0.010284 | 0.00337  | 0.018793 |
| 213975_s_at | LYZ          | 0.036587 | 9.83E-11 | 6.03E-09 |
| 213991_s_at | HS3ST1       | 0.005259 | 0.006873 | 0.033236 |
| 213992_at   | COL4A6       | -0.01237 | 0.000338 | 0.002789 |
| 213994_s_at | SPON1        | 0.014942 | 0.001059 | 0.007269 |
| 214000_s_at | RGS10        | 0.020547 | 1.38E-08 | 3.96E-07 |
| 214001_x_at |              | 0.007882 | 4.42E-06 | 6.47E-05 |
| 214003_x_at | RPS20        | 0.003675 | 0.000418 | 0.003355 |
| 214011_s_at | NOP16        | -0.0074  | 0.00915  | 0.041667 |
| 214013_s_at | TBC1D1       | -0.00613 | 0.002071 | 0.012612 |
| 214016_s_at | LOC100506168 | 0.006321 | 0.00125  | 0.008294 |
| 214022_s_at | IFITM1       | 0.025166 | 1.46E-10 | 8.32E-09 |
| 214031_s_at | KRT7         | 0.018925 | 4.15E-06 | 6.12E-05 |
| 214033_at   | ABCC6        | -0.02239 | 5.1E-13  | 6.96E-11 |
| 214036_at   | EFNA5        | 0.010169 | 0.000222 | 0.001955 |
| 214038_at   | CCL8         | 0.01307  | 0.008772 | 0.040211 |
| 214039_s_at | LAPTM4B      | 0.008204 | 0.000118 | 0.001137 |
| 214041_x_at | RPL37A       | 0.002766 | 0.004825 | 0.025166 |
| 214043_at   | PTPRD        | -0.01357 | 3.65E-07 | 7.15E-06 |
| 214045_at   | LIAS         | -0.00943 | 0.000143 | 0.001343 |
| 214051_at   | TMSB15B      | 0.014168 | 1.42E-07 | 3.09E-06 |



|             |              |          |          |          |
|-------------|--------------|----------|----------|----------|
| 214052_x_at | BAT2L2       | 0.006896 | 0.00121  | 0.008089 |
| 214054_at   | DOK2         | 0.004942 | 0.003457 | 0.019183 |
| 214055_x_at | BAT2L2       | 0.004633 | 0.005722 | 0.028665 |
| 214058_at   | MYCL1        | 0.00611  | 0.003386 | 0.018865 |
| 214059_at   | IFI44        | 0.007302 | 0.00715  | 0.034377 |
| 214069_at   | ACSM2A       | -0.02325 | 1.59E-08 | 4.47E-07 |
| 214077_x_at | MEIS3P1      | 0.005234 | 0.002437 | 0.014404 |
| 214081_at   | PLXDC1       | 0.006043 | 0.008264 | 0.038409 |
| 214084_x_at | NCF1C        | 0.006349 | 0.001444 | 0.009341 |
| 214085_x_at | GLIPR1       | 0.006828 | 0.000816 | 0.005889 |
| 214088_s_at | FUT3         | -0.02505 | 7.5E-14  | 1.31E-11 |
| 214091_s_at | GPX3         | -0.00925 | 2.2E-09  | 8.1E-08  |
| 214095_at   | SHMT2        | -0.00993 | 8.78E-05 | 0.000887 |
| 214096_s_at | SHMT2        | -0.00528 | 0.00323  | 0.018141 |
| 214104_at   | GPR161       | 0.006744 | 6.81E-05 | 0.00071  |
| 214108_at   | MAX          | -0.00602 | 0.001697 | 0.010701 |
| 214109_at   | LRBA         | -0.00916 | 0.003079 | 0.017449 |
| 214111_at   | OPCML        | -0.00669 | 0.008508 | 0.039256 |
| 214116_at   |              | -0.01074 | 4.15E-05 | 0.000463 |
| 214118_x_at | PCM1         | 0.004666 | 0.004777 | 0.024974 |
| 214121_x_at | PDLIM7       | 0.005674 | 0.004096 | 0.022006 |
| 214129_at   | PDE4DIP      | -0.00658 | 0.000116 | 0.001121 |
| 214130_s_at | PDE4DIP      | -0.00766 | 0.005099 | 0.026297 |
| 214140_at   | SLC25A16     | -0.0074  | 0.001985 | 0.012189 |
| 214141_x_at | SRSF7        | 0.00716  | 0.000909 | 0.006449 |
| 214143_x_at | RPL24        | 0.004646 | 0.001206 | 0.00807  |
| 214155_s_at | LARP4        | -0.00949 | 1.9E-05  | 0.000232 |
| 214156_at   | MYRIP        | -0.00922 | 0.002761 | 0.015941 |
| 214161_at   | OSGIN2       | -0.00474 | 0.002591 | 0.015144 |
| 214164_x_at | CA12         | -0.00575 | 0.00211  | 0.01278  |
| 214170_x_at | FH           | -0.01211 | 4.23E-12 | 4.19E-10 |
| 214174_s_at | PDLIM4       | 0.009218 | 0.000248 | 0.00215  |
| 214175_x_at | PDLIM4       | 0.010411 | 0.000109 | 0.001071 |
| 214179_s_at | NFE2L1       | -0.00841 | 9.29E-05 | 0.000931 |
| 214180_at   | MAN1C1       | -0.01111 | 4.98E-06 | 7.16E-05 |
| 214181_x_at | LST1         | 0.023219 | 8.55E-10 | 3.61E-08 |
| 214182_at   |              | 0.003472 | 0.011147 | 0.048774 |
| 214189_s_at | GGA2         | -0.00956 | 1.44E-05 | 0.000181 |
| 214190_x_at | GGA2         | -0.00949 | 1.5E-05  | 0.000187 |
| 214203_s_at | PRODH        | -0.01885 | 2.17E-11 | 1.67E-09 |
| 214204_at   | PACRG        | -0.00606 | 0.010494 | 0.046551 |
| 214211_at   | FTH1         | -0.00718 | 8.09E-05 | 0.000823 |
| 214212_x_at | FERMT2       | -0.00611 | 0.001915 | 0.011827 |
| 214214_s_at | C1QBP        | -0.00921 | 6.86E-07 | 1.26E-05 |
| 214219_x_at | MAP4K1       | 0.013147 | 1.58E-06 | 2.6E-05  |
| 214231_s_at | KIAA0564     | -0.01498 | 5.65E-12 | 5.38E-10 |
| 214234_s_at | CYP3A5       | -0.01488 | 4.15E-05 | 0.000463 |
| 214235_at   | CYP3A5       | -0.01243 | 4.24E-05 | 0.000471 |
| 214236_at   | LOC100286895 | 0.007246 | 0.007416 | 0.035355 |

|             |            |          |          |          |
|-------------|------------|----------|----------|----------|
| 214239_x_at | PCGF2      | -0.00402 | 0.011077 | 0.048556 |
| 214243_s_at | SERHL      | 0.005987 | 0.004147 | 0.022228 |
| 214247_s_at | DKK3       | 0.016003 | 1.33E-05 | 0.000169 |
| 214259_s_at | AKR7A2     | -0.01045 | 1.14E-06 | 1.97E-05 |
| 214261_s_at | ADH6       | -0.02464 | 1.21E-15 | 5.62E-13 |
| 214263_x_at | POLR2C     | -0.00449 | 0.003028 | 0.0172   |
| 214268_s_at | MTMR4      | -0.01134 | 7.09E-09 | 2.24E-07 |
| 214271_x_at | RPL12      | 0.005029 | 0.000969 | 0.00677  |
| 214274_s_at | ACAA1      | -0.0238  | 8.38E-20 | 3.11E-16 |
| 214277_at   | COX11      | -0.01313 | 5.86E-05 | 0.000627 |
| 214285_at   | FABP3      | -0.01411 | 1.04E-06 | 1.82E-05 |
| 214290_s_at | HIST2H2AA3 | 0.012443 | 0.009564 | 0.043096 |
| 214298_x_at | SEPT6      | 0.00841  | 6.23E-05 | 0.00066  |
| 214300_s_at | TOP3A      | -0.00547 | 0.009799 | 0.043984 |
| 214307_at   | HGD        | -0.01197 | 1.59E-08 | 4.47E-07 |
| 214308_s_at | HGD        | -0.0165  | 1.23E-06 | 2.1E-05  |
| 214321_at   | NOV        | 0.020138 | 2.73E-10 | 1.38E-08 |
| 214329_x_at | TNFSF10    | 0.009117 | 0.000496 | 0.003892 |
| 214331_at   | TSMF       | -0.00952 | 3.58E-05 | 0.000408 |
| 214332_s_at | TSMF       | -0.01312 | 8.94E-09 | 2.71E-07 |
| 214339_s_at | MAP4K1     | 0.013909 | 3.02E-07 | 6.08E-06 |
| 214342_at   | ATXN7L1    | -0.01254 | 1.38E-06 | 2.31E-05 |
| 214343_s_at | ATXN7L1    | -0.0149  | 2.6E-06  | 4.04E-05 |
| 214347_s_at | DDC        | -0.01835 | 7.15E-05 | 0.00074  |
| 214351_x_at | RPL13      | 0.0077   | 0.008312 | 0.03856  |
| 214355_x_at | CTAGE15P   | -0.00482 | 0.003926 | 0.021273 |
| 214365_at   | TPM3       | 0.007214 | 0.000297 | 0.002499 |
| 214367_at   | RASGRP2    | 0.007142 | 0.000555 | 0.00427  |
| 214369_s_at | RASGRP2    | 0.010706 | 9.08E-06 | 0.000121 |
| 214370_at   | S100A8     | 0.012557 | 0.009917 | 0.044432 |
| 214374_s_at | PPFIBP1    | 0.007149 | 0.005149 | 0.026465 |
| 214382_at   | UNC93A     | -0.01017 | 0.001393 | 0.009077 |
| 214389_at   | SLC5A12    | -0.03301 | 2.27E-12 | 2.52E-10 |
| 214400_at   | INSL3      | 0.005118 | 0.009644 | 0.043412 |
| 214414_x_at | HBA1       | 0.023735 | 0.002088 | 0.012681 |
| 214423_x_at | ALDOB      | -0.02382 | 6.06E-08 | 1.44E-06 |
| 214424_s_at | ALDOB      | -0.03474 | 9.82E-08 | 2.22E-06 |
| 214428_x_at | C4A        | -0.00976 | 0.000727 | 0.005356 |
| 214433_s_at | SELENBP1   | -0.02025 | 1.68E-15 | 6.81E-13 |
| 214434_at   | HSPA12A    | -0.01618 | 2.81E-12 | 2.97E-10 |
| 214437_s_at | SHMT2      | -0.01166 | 0.00014  | 0.001318 |
| 214438_at   | HLX        | 0.007338 | 0.000757 | 0.005526 |
| 214439_x_at | BIN1       | -0.01189 | 2.02E-05 | 0.000245 |
| 214440_at   | NAT1       | -0.00879 | 0.000171 | 0.00157  |
| 214447_at   | ETS1       | 0.008246 | 7.12E-05 | 0.000738 |
| 214450_at   | CTSW       | 0.006687 | 0.000933 | 0.006583 |
| 214452_at   | BCAT1      | 0.010341 | 0.001675 | 0.010576 |
| 214453_s_at | IFI44      | 0.021488 | 1.54E-09 | 5.93E-08 |
| 214454_at   | ADAMTS2    | 0.007109 | 0.002135 | 0.012898 |

|             |           |          |          |          |
|-------------|-----------|----------|----------|----------|
| 214456_x_at | SAA1      | 0.017544 | 6.99E-10 | 3.01E-08 |
| 214459_x_at | HLA-C     | 0.008156 | 0.004981 | 0.0258   |
| 214467_at   | GPR65     | 0.009872 | 0.000298 | 0.002508 |
| 214469_at   | HIST1H2AE | 0.014271 | 6.5E-05  | 0.000683 |
| 214470_at   | KLRB1     | 0.022377 | 1.11E-11 | 9.72E-10 |
| 214475_x_at | CAPN3     | -0.02797 | 2.56E-12 | 2.74E-10 |
| 214480_at   | ETV3      | 0.007479 | 0.010554 | 0.046771 |
| 214490_at   | ARSF      | -0.02289 | 3.24E-10 | 1.59E-08 |
| 214493_s_at | INADL     | -0.00651 | 0.000597 | 0.004538 |
| 214494_s_at | SPG7      | -0.00593 | 0.006163 | 0.030416 |
| 214499_s_at | BCLAF1    | 0.004628 | 0.001131 | 0.00766  |
| 214505_s_at | FHL1      | 0.017584 | 2.42E-05 | 0.000287 |
| 214511_x_at | FCGR1B    | 0.011288 | 4.21E-05 | 0.000468 |
| 214512_s_at | SUB1      | 0.006669 | 0.001094 | 0.007468 |
| 214533_at   | CMA1      | 0.008712 | 7.22E-05 | 0.000747 |
| 214534_at   | HIST1H1B  | 0.006634 | 0.000254 | 0.002193 |
| 214535_s_at | ADAMTS2   | 0.004448 | 0.0058   | 0.02899  |
| 214537_at   | HIST1H1D  | 0.016091 | 1.63E-08 | 4.56E-07 |
| 214542_x_at | HIST1H2AI | 0.010413 | 0.000429 | 0.003433 |
| 214543_x_at | QKI       | 0.006369 | 0.001909 | 0.011799 |
| 214545_s_at | PROSC     | -0.00924 | 0.001308 | 0.008621 |
| 214549_x_at | SPRR1A    | 0.005259 | 0.005808 | 0.029015 |
| 214560_at   | FPR3      | 0.018374 | 4.17E-07 | 8.09E-06 |
| 214562_at   | HIST1H4L  | 0.004393 | 0.007868 | 0.036917 |
| 214567_s_at | XCL1      | 0.017568 | 7.15E-09 | 2.26E-07 |
| 214574_x_at | LST1      | 0.023155 | 1.89E-10 | 1.03E-08 |
| 214578_s_at | ROCK1     | 0.004682 | 0.010315 | 0.045867 |
| 214581_x_at | TNFRSF21  | -0.01635 | 1.03E-06 | 1.81E-05 |
| 214583_at   | DDI2      | -0.00796 | 8.13E-06 | 0.00011  |
| 214587_at   | COL8A1    | 0.009732 | 0.000263 | 0.002254 |
| 214591_at   | KLHL4     | 0.010635 | 0.001549 | 0.0099   |
| 214596_at   | CHRM3     | -0.01382 | 0.00019  | 0.001713 |
| 214597_at   | SSTR2     | -0.01117 | 0.000245 | 0.002124 |
| 214598_at   | CLDN8     | -0.01319 | 1.67E-05 | 0.000207 |
| 214604_at   | HOXD11    | 0.004562 | 0.01067  | 0.047168 |
| 214617_at   | PRF1      | 0.011893 | 3.3E-07  | 6.58E-06 |
| 214632_at   | NRP2      | 0.006244 | 0.001249 | 0.008293 |
| 214643_x_at | BIN1      | -0.00903 | 0.000812 | 0.005869 |
| 214651_s_at | HOXA10    | -0.00651 | 0.001232 | 0.008209 |
| 214668_at   | C13orf1   | -0.00653 | 0.003115 | 0.017596 |
| 214669_x_at | IGKC      | 0.038708 | 4.17E-09 | 1.39E-07 |
| 214676_x_at | MUC3A     | 0.010995 | 9.62E-05 | 0.000958 |
| 214677_x_at | IGLV1-44  | 0.042247 | 2.25E-08 | 6.05E-07 |
| 214679_x_at | GNA11     | -0.00563 | 0.000801 | 0.005799 |
| 214681_at   | GK        | -0.02285 | 1.22E-12 | 1.48E-10 |
| 214686_at   | ZNF266    | 0.00749  | 0.005474 | 0.027727 |
| 214693_x_at | NBPF10    | 0.008051 | 0.005934 | 0.02956  |
| 214696_at   | C17orf91  | -0.01665 | 8.78E-10 | 3.7E-08  |
| 214697_s_at | ROD1      | 0.007714 | 0.003814 | 0.020779 |

|             |                 |          |          |          |
|-------------|-----------------|----------|----------|----------|
| 214698_at   | ROD1            | 0.005586 | 0.003475 | 0.019256 |
| 214701_s_at | FN1             | 0.01299  | 0.000546 | 0.004217 |
| 214722_at   | NOTCH2NL        | 0.008007 | 0.001515 | 0.00972  |
| 214723_x_at | ANKRD36         | 0.015017 | 1.31E-05 | 0.000166 |
| 214724_at   | DIXDC1          | -0.00824 | 0.000161 | 0.001493 |
| 214737_x_at | HNRNPC          | 0.00443  | 0.006524 | 0.031849 |
| 214743_at   | CUX1            | -0.00637 | 0.00318  | 0.01791  |
| 214749_s_at | ARMCX6          | 0.007308 | 0.000306 | 0.002558 |
| 214755_at   | UAP1L1          | -0.00962 | 3.16E-05 | 0.000365 |
| 214759_at   | WTAP            | 0.005743 | 0.004607 | 0.02424  |
| 214761_at   | ZNF423          | 0.00704  | 0.00175  | 0.010976 |
| 214763_at   | ACOT11          | -0.01777 | 1.35E-11 | 1.15E-09 |
| 214767_s_at | HSPB6           | 0.020003 | 5.46E-05 | 0.000588 |
| 214768_x_at | IGKV1-5         | 0.027919 | 1.13E-09 | 4.54E-08 |
| 214769_at   | CLCN4           | -0.0071  | 0.005454 | 0.027646 |
| 214776_x_at | XYLB            | -0.02182 | 4.23E-12 | 4.19E-10 |
| 214777_at   | IGKV4-1         | 0.02584  | 6.24E-11 | 4.03E-09 |
| 214778_at   | MEGF8           | -0.00663 | 0.001983 | 0.012178 |
| 214785_at   | VPS13A          | -0.01129 | 7.5E-05  | 0.000772 |
| 214786_at   | MAP3K1          | 0.01206  | 9.85E-06 | 0.00013  |
| 214791_at   | SP140L          | 0.016164 | 1.64E-07 | 3.53E-06 |
| 214792_x_at | VAMP2           | -0.00416 | 0.009955 | 0.04454  |
| 214797_s_at | CDK18           | -0.00899 | 4.21E-05 | 0.000468 |
| 214798_at   | ATP2C2          | -0.00529 | 0.001403 | 0.009127 |
| 214807_at   |                 | -0.01014 | 9.12E-06 | 0.000122 |
| 214821_at   | SLC25A4         | -0.00727 | 0.006072 | 0.030075 |
| 214826_at   | PDE12           | -0.00748 | 0.001761 | 0.011035 |
| 214827_at   | PARD6B          | -0.00737 | 5.14E-05 | 0.000558 |
| 214829_at   | AASS            | -0.01862 | 5.51E-07 | 1.04E-05 |
| 214830_at   | SLC38A6         | -0.00784 | 0.000696 | 0.005165 |
| 214832_at   | HNF4A           | -0.0179  | 5.65E-05 | 0.000606 |
| 214835_s_at | SUCLG2          | -0.00736 | 0.007785 | 0.036687 |
| 214836_x_at | IGK@            | 0.030281 | 5.09E-08 | 1.25E-06 |
| 214842_s_at |                 | -0.021   | 0.001393 | 0.009076 |
| 214844_s_at | DOK5            | 0.011768 | 0.000112 | 0.001088 |
| 214845_s_at | CALU            | 0.006977 | 0.006521 | 0.031841 |
| 214847_s_at | GPSM3           | 0.007193 | 0.000107 | 0.001047 |
| 214851_at   | HNF4A           | -0.00964 | 0.00206  | 0.012563 |
| 214857_at   |                 | -0.00472 | 0.009175 | 0.041743 |
| 214864_s_at | GRHPR           | -0.01461 | 8.97E-10 | 3.75E-08 |
| 214869_x_at | GAPVD1          | -0.00765 | 4.42E-05 | 0.000488 |
| 214883_at   | THRA            | -0.0049  | 0.003438 | 0.019101 |
| 214895_s_at | ADAM10          | 0.007836 | 0.001282 | 0.008465 |
| 214898_x_at | MUC3B           | 0.007239 | 0.000594 | 0.004517 |
| 214910_s_at | APOM            | -0.02592 | 2.66E-07 | 5.42E-06 |
| 214916_x_at | IGHA1           | 0.025706 | 1.15E-10 | 6.82E-09 |
| 214919_s_at | ANKHD1-EIF4EBP3 | -0.0076  | 0.000383 | 0.003104 |
| 214920_at   | THSD7A          | -0.00882 | 0.000941 | 0.006628 |
| 214923_at   | ATP6V1D         | -0.01403 | 1.2E-05  | 0.000154 |

|             |           |          |          |          |
|-------------|-----------|----------|----------|----------|
| 214927_at   | ITGBL1    | 0.015146 | 0.000239 | 0.002079 |
| 214937_x_at | PCM1      | 0.00418  | 0.003838 | 0.020879 |
| 214938_x_at | HMGB1     | 0.002668 | 0.006876 | 0.033242 |
| 214944_at   | PHLPP2    | -0.00737 | 0.002489 | 0.014644 |
| 214948_s_at | TMF1      | 0.00682  | 0.000674 | 0.005036 |
| 214949_at   |           | 0.005329 | 0.007447 | 0.035477 |
| 214951_at   | SLC26A10  | 0.006486 | 0.003764 | 0.020559 |
| 214960_at   | API5      | -0.00777 | 0.007398 | 0.035284 |
| 214973_x_at | IGHD      | 0.031457 | 5.26E-10 | 2.38E-08 |
| 214992_s_at | DNASE2    | 0.004195 | 0.005078 | 0.026204 |
| 214994_at   | APOBEC3F  | 0.008582 | 0.000454 | 0.003603 |
| 214995_s_at | APOBEC3F  | 0.00788  | 0.005559 | 0.028069 |
| 214999_s_at | RAB11FIP3 | -0.03209 | 7.46E-11 | 4.71E-09 |
| 215001_s_at | GLUL      | 0.005111 | 0.000161 | 0.001493 |
| 215003_at   | DGCR9     | -0.00671 | 0.000939 | 0.006623 |
| 215005_at   | NECAB2    | -0.01996 | 3.91E-09 | 1.32E-07 |
| 215022_x_at | ZNF33B    | -0.00637 | 0.0103   | 0.045824 |
| 215034_s_at | TM4SF1    | 0.010122 | 0.000257 | 0.002216 |
| 215035_at   | IGLV6-57  | 0.007014 | 0.000337 | 0.00278  |
| 215036_at   |           | 0.017594 | 3.87E-08 | 9.74E-07 |
| 215039_at   | HS2ST1    | 0.009359 | 0.001108 | 0.007542 |
| 215043_s_at | SMA4      | 0.010502 | 0.011189 | 0.04892  |
| 215045_at   | CELF3     | -0.00811 | 2.36E-05 | 0.000281 |
| 215049_x_at | CD163     | 0.023555 | 4.28E-09 | 1.42E-07 |
| 215051_x_at | AIF1      | 0.011723 | 1.8E-05  | 0.000221 |
| 215058_at   | DENND5B   | -0.00787 | 0.000751 | 0.005492 |
| 215059_at   |           | -0.01582 | 0.002526 | 0.01481  |
| 215071_s_at | HIST1H2AC | -0.00809 | 0.005039 | 0.026034 |
| 215073_s_at | NR2F2     | 0.007216 | 0.000672 | 0.005026 |
| 215076_s_at | COL3A1    | 0.023793 | 7.76E-07 | 1.4E-05  |
| 215088_s_at | SDHC      | -0.00588 | 2.72E-07 | 5.54E-06 |
| 215096_s_at | ESD       | -0.00376 | 0.005174 | 0.026546 |
| 215118_s_at | IGHA1     | 0.010354 | 7.9E-06  | 0.000108 |
| 215121_x_at | IGLC7     | 0.038698 | 2.99E-09 | 1.06E-07 |
| 215125_s_at | UGT1A1    | -0.02168 | 1.58E-10 | 8.85E-09 |
| 215128_at   |           | -0.00815 | 0.002176 | 0.013099 |
| 215136_s_at | EXOSC8    | 0.00514  | 0.004505 | 0.023792 |
| 215144_at   |           | 0.004483 | 0.010972 | 0.048193 |
| 215149_at   |           | -0.01188 | 0.002009 | 0.012296 |
| 215176_x_at | IGK@      | 0.043917 | 3.06E-10 | 1.51E-08 |
| 215177_s_at | ITGA6     | -0.00851 | 2.77E-06 | 4.28E-05 |
| 215188_at   | STK24     | -0.00948 | 0.006566 | 0.032008 |
| 215193_x_at | HLA-DRB1  | 0.018085 | 0.000265 | 0.002274 |
| 215194_at   | PRKCA     | -0.00921 | 0.003736 | 0.02044  |
| 215195_at   | PRKCA     | -0.00552 | 0.007586 | 0.035981 |
| 215198_s_at | CALD1     | -0.00693 | 0.002089 | 0.012683 |
| 215210_s_at | DLST      | -0.01376 | 1.95E-10 | 1.06E-08 |
| 215214_at   | IGL@      | 0.018826 | 7.05E-07 | 1.28E-05 |
| 215217_at   | IGKC      | 0.045895 | 1.92E-10 | 1.04E-08 |

|             |              |          |          |          |
|-------------|--------------|----------|----------|----------|
| 215222_x_at | MACF1        | 0.005109 | 0.010153 | 0.045298 |
| 215227_x_at | ACP1         | -0.00479 | 0.004429 | 0.023445 |
| 215233_at   | JMJD6        | -0.00724 | 0.007498 | 0.035655 |
| 215239_x_at | ZNF273       | 0.005914 | 2.43E-06 | 3.82E-05 |
| 215243_s_at | GJB3         | 0.004314 | 0.010306 | 0.045842 |
| 215274_at   | SLC12A3      | -0.02346 | 7.93E-09 | 2.45E-07 |
| 215286_s_at | PHTF2        | 0.008202 | 4.94E-05 | 0.00054  |
| 215291_at   | MKL1         | 0.005788 | 0.002635 | 0.015361 |
| 215292_s_at | MKL1         | 0.010661 | 0.001621 | 0.010282 |
| 215300_s_at | FMO5         | -0.02099 | 3.15E-07 | 6.32E-06 |
| 215313_x_at | HLA-A        | 0.00721  | 0.000284 | 0.002407 |
| 215321_at   | RUNDC3B      | -0.00624 | 0.003932 | 0.021292 |
| 215338_s_at | NKTR         | 0.006402 | 0.005898 | 0.029394 |
| 215345_x_at |              | 0.004842 | 0.006305 | 0.030999 |
| 215363_x_at | FOLH1        | -0.03555 | 3.79E-14 | 7.48E-12 |
| 215379_x_at | IGLC7        | 0.034138 | 2.54E-08 | 6.73E-07 |
| 215382_x_at | LOC100507804 | 0.022213 | 3.96E-10 | 1.87E-08 |
| 215384_s_at | MAP1A        | 0.005559 | 0.006853 | 0.033144 |
| 215388_s_at | CFH          | 0.023062 | 6.75E-10 | 2.92E-08 |
| 215389_s_at | TNNT2        | -0.01175 | 0.008266 | 0.038411 |
| 215422_at   |              | -0.00891 | 3.24E-06 | 4.9E-05  |
| 215423_at   |              | -0.00758 | 0.004011 | 0.02166  |
| 215425_at   | BTG3         | 0.008299 | 0.000561 | 0.004307 |
| 215436_at   | HSDL2        | -0.01361 | 3.13E-05 | 0.000362 |
| 215450_at   | SNRPE        | 0.004578 | 0.000257 | 0.002218 |
| 215452_x_at | SUMO4        | 0.004034 | 0.004313 | 0.022962 |
| 215471_s_at | MAP7         | -0.01528 | 5.14E-08 | 1.25E-06 |
| 215485_s_at | ICAM1        | 0.010681 | 0.003228 | 0.018136 |
| 215490_at   | C1orf69      | -0.00826 | 0.00014  | 0.001317 |
| 215493_x_at | BTN2A1       | 0.006769 | 0.002697 | 0.015642 |
| 215499_at   | MAP2K3       | -0.00645 | 0.000169 | 0.001553 |
| 215501_s_at | DUSP10       | 0.004944 | 0.011509 | 0.049998 |
| 215502_at   |              | 0.004864 | 0.003497 | 0.019349 |
| 215524_x_at | TRAC         | 0.008541 | 4.78E-05 | 0.000524 |
| 215535_s_at | AGPAT1       | -0.008   | 7.89E-05 | 0.000806 |
| 215552_s_at | ESR1         | 0.00472  | 0.006506 | 0.031781 |
| 215559_at   | ABCC6        | -0.02652 | 6.25E-14 | 1.11E-11 |
| 215565_at   |              | 0.010862 | 0.000278 | 0.002362 |
| 215603_x_at | GGT1         | -0.01118 | 1.03E-05 | 0.000136 |
| 215621_s_at | IGHD         | 0.009526 | 0.002247 | 0.013477 |
| 215633_x_at | LST1         | 0.017266 | 1.71E-09 | 6.47E-08 |
| 215646_s_at | VCAN         | 0.039454 | 2.11E-10 | 1.13E-08 |
| 215649_s_at | MVK          | -0.00615 | 0.006437 | 0.031501 |
| 215669_at   | HLA-DRB4     | 0.00629  | 0.008298 | 0.038527 |
| 215672_s_at | AHCYL2       | -0.0126  | 6.69E-05 | 0.0007   |
| 215690_x_at | GPAA1        | -0.00363 | 0.006897 | 0.033331 |
| 215692_s_at | MPPED2       | -0.01045 | 0.000261 | 0.002243 |
| 215706_x_at | ZYX          | 0.008796 | 0.001214 | 0.00811  |
| 215707_s_at | PRNP         | -0.01295 | 3.34E-05 | 0.000383 |

|             |              |          |          |          |
|-------------|--------------|----------|----------|----------|
| 215708_s_at | PRIM2        | 0.007582 | 0.005544 | 0.028009 |
| 215719_x_at | FAS          | 0.01947  | 9.72E-10 | 4E-08    |
| 215723_s_at | PLD1         | -0.00718 | 0.000675 | 0.00504  |
| 215726_s_at | CYB5A        | -0.01898 | 4.76E-16 | 2.79E-13 |
| 215731_s_at | MPHOSPH9     | -0.0073  | 0.000504 | 0.003943 |
| 215732_s_at | DTX2         | 0.006127 | 0.001617 | 0.010267 |
| 215739_s_at | TUBGCP3      | -0.009   | 0.001569 | 0.010013 |
| 215758_x_at | ZNF93        | 0.00661  | 0.000309 | 0.002578 |
| 215760_s_at | SBNO2        | 0.005004 | 0.005057 | 0.026122 |
| 215772_x_at | SUCLG2       | -0.0171  | 1.49E-12 | 1.75E-10 |
| 215774_s_at | SUCLG2       | -0.01228 | 0.000658 | 0.004938 |
| 215775_at   |              | 0.013166 | 0.00012  | 0.001152 |
| 215777_at   | IGLV4-60     | 0.006571 | 0.000699 | 0.005181 |
| 215779_s_at | HIST1H2BG    | 0.009852 | 0.007662 | 0.036237 |
| 215783_s_at | ALPL         | -0.01972 | 1.55E-08 | 4.38E-07 |
| 215784_at   | CD1E         | 0.029697 | 3.21E-11 | 2.34E-09 |
| 215785_s_at | CYFIP2       | -0.01593 | 1.86E-10 | 1.02E-08 |
| 215787_at   | ACTA2        | 0.01784  | 7.96E-05 | 0.000812 |
| 215792_s_at | DNAJC11      | -0.00808 | 4.33E-06 | 6.35E-05 |
| 215794_x_at | GLUD2        | -0.01435 | 1.89E-06 | 3.05E-05 |
| 215796_at   |              | 0.007072 | 0.000906 | 0.006438 |
| 215798_at   | ALDH1L1      | -0.00737 | 0.002168 | 0.013062 |
| 215812_s_at | SLC6A10P     | -0.01271 | 0.001233 | 0.008215 |
| 215853_at   |              | 0.013499 | 0.000967 | 0.00676  |
| 215867_x_at | CA12         | -0.00707 | 0.002508 | 0.014727 |
| 215881_x_at | SSX2         | 0.005113 | 0.01094  | 0.048089 |
| 215886_x_at | USP12        | -0.00385 | 0.010399 | 0.046186 |
| 215891_s_at | GM2A         | 0.007677 | 0.01013  | 0.045226 |
| 215903_s_at | MAST2        | -0.00642 | 0.004722 | 0.024718 |
| 215909_x_at | MINK1        | -0.00558 | 0.001268 | 0.008384 |
| 215930_s_at | CTAGE5       | -0.00722 | 3.91E-05 | 0.000441 |
| 215931_s_at | ARFGEF2      | -0.00592 | 0.00719  | 0.034503 |
| 215946_x_at | IGLL3P       | 0.02238  | 1.25E-07 | 2.78E-06 |
| 215949_x_at | IGHM         | 0.011623 | 5.89E-05 | 0.00063  |
| 215959_at   | PPFIBP2      | -0.00828 | 0.001452 | 0.009392 |
| 215966_x_at | GK3P         | -0.0227  | 6.81E-10 | 2.94E-08 |
| 215967_s_at | LY9          | 0.010368 | 4.08E-05 | 0.000457 |
| 215975_x_at |              | -0.01898 | 8.75E-07 | 1.56E-05 |
| 215977_x_at | GK           | -0.02376 | 3.09E-08 | 8E-07    |
| 215990_s_at | BCL6         | 0.007434 | 0.008244 | 0.038341 |
| 215991_s_at | KIAA0090     | -0.00715 | 0.004124 | 0.022125 |
| 215996_at   |              | 0.004665 | 0.009622 | 0.043321 |
| 216024_at   | DNM2         | -0.00966 | 4.48E-08 | 1.11E-06 |
| 216031_x_at | HN1L         | 0.009241 | 0.000442 | 0.003527 |
| 216033_s_at | FYN          | -0.0098  | 0.010645 | 0.04709  |
| 216036_x_at | WDTC1        | -0.00655 | 9.2E-06  | 0.000123 |
| 216056_at   | CD44         | 0.007868 | 0.008176 | 0.038094 |
| 216062_at   | LOC100507164 | 0.010262 | 0.004315 | 0.022965 |
| 216079_at   | EPM2A        | -0.00508 | 0.007194 | 0.034509 |

|             |              |          |          |          |
|-------------|--------------|----------|----------|----------|
| 216092_s_at | SLC7A8       | -0.02579 | 6.12E-11 | 3.96E-09 |
| 216134_at   | FRMD4B       | -0.00626 | 0.010969 | 0.048193 |
| 216150_at   |              | 0.005157 | 0.008978 | 0.040977 |
| 216179_x_at |              | -0.01271 | 1.01E-08 | 3.02E-07 |
| 216191_s_at | TRDV3        | 0.016146 | 1.28E-07 | 2.82E-06 |
| 216207_x_at | IGKC         | 0.030912 | 1.52E-10 | 8.57E-09 |
| 216212_s_at | DKC1         | 0.006665 | 0.000985 | 0.006863 |
| 216218_s_at | PLCL2        | -0.01109 | 4.75E-05 | 0.000522 |
| 216219_at   | AQP6         | -0.00776 | 0.009426 | 0.042608 |
| 216223_at   | CPN2         | -0.03222 | 1.16E-11 | 1.01E-09 |
| 216224_s_at | HDAC6        | -0.01132 | 9.96E-10 | 4.07E-08 |
| 216230_x_at | SMPD1        | -0.0088  | 0.002626 | 0.015321 |
| 216231_s_at | B2M          | 0.013953 | 1.81E-05 | 0.000223 |
| 216235_s_at | EDNRA        | 0.00908  | 0.000638 | 0.004806 |
| 216236_s_at | SLC2A14      | 0.00802  | 0.006499 | 0.031754 |
| 216237_s_at | MCM5         | 0.006908 | 0.00025  | 0.002166 |
| 216246_at   |              | 0.004005 | 0.002136 | 0.012898 |
| 216250_s_at | LPXN         | 0.006865 | 0.002126 | 0.012855 |
| 216252_x_at | FAS          | 0.01514  | 2.43E-08 | 6.48E-07 |
| 216274_s_at | SEC11A       | 0.003507 | 0.004183 | 0.022418 |
| 216301_at   | LOC100287927 | 0.007664 | 5.35E-05 | 0.000578 |
| 216305_s_at | C2orf3       | -0.00792 | 0.000245 | 0.002126 |
| 216307_at   | DGKB         | -0.00771 | 0.001988 | 0.012202 |
| 216308_x_at | GRHPR        | -0.0161  | 4.01E-09 | 1.34E-07 |
| 216316_x_at | GK           | -0.01767 | 4.8E-07  | 9.16E-06 |
| 216318_at   | IGHA1        | 0.016567 | 8E-10    | 3.41E-08 |
| 216320_x_at | MST1         | -0.01176 | 4.01E-05 | 0.00045  |
| 216329_at   |              | 0.006133 | 0.007765 | 0.036623 |
| 216333_x_at | TNXA         | 0.008491 | 0.000594 | 0.004517 |
| 216342_x_at |              | 0.004433 | 9.15E-05 | 0.00092  |
| 216363_at   |              | 0.005873 | 0.001365 | 0.00894  |
| 216365_x_at | IGLV3-19     | 0.014041 | 1.5E-10  | 8.5E-09  |
| 216366_x_at |              | 0.011517 | 9.06E-06 | 0.000121 |
| 216367_at   | COL4A3       | 0.005269 | 0.003083 | 0.01746  |
| 216379_x_at | CD24         | 0.010534 | 5.93E-07 | 1.1E-05  |
| 216381_x_at | AKR7A3       | -0.02901 | 2.28E-14 | 4.99E-12 |
| 216384_x_at | LOC441454    | 0.006479 | 1.37E-05 | 0.000174 |
| 216387_x_at |              | 0.002973 | 0.005617 | 0.028273 |
| 216394_x_at |              | 0.008813 | 8.83E-06 | 0.000118 |
| 216401_x_at |              | 0.02118  | 3.19E-08 | 8.19E-07 |
| 216411_s_at | GALK2        | -0.00557 | 0.001207 | 0.00807  |
| 216412_x_at | IGLV1-40     | 0.00925  | 1.09E-05 | 0.000142 |
| 216417_x_at | HOXB9        | 0.013046 | 0.000528 | 0.004113 |
| 216425_at   |              | -0.00942 | 0.000583 | 0.004457 |
| 216428_x_at | KIR3DX1      | 0.01182  | 0.002141 | 0.012924 |
| 216438_s_at | TMSB4X       | 0.019016 | 4.81E-11 | 3.27E-09 |
| 216442_x_at | FN1          | 0.013028 | 2.21E-05 | 0.000265 |
| 216445_at   |              | 0.005439 | 0.002665 | 0.015499 |
| 216452_at   | TRPM3        | -0.01708 | 7.32E-11 | 4.64E-09 |



|             |              |          |          |          |
|-------------|--------------|----------|----------|----------|
| 216474_x_at | TPSAB1       | 0.026187 | 3.28E-14 | 6.68E-12 |
| 216484_x_at | HDGF         | -0.00402 | 0.001466 | 0.009461 |
| 216485_s_at | TPSAB1       | 0.009788 | 2.21E-05 | 0.000265 |
| 216489_at   | TRPM3        | -0.0183  | 5.78E-09 | 1.86E-07 |
| 216491_x_at | IGHM         | 0.028446 | 3.28E-08 | 8.4E-07  |
| 216495_x_at |              | 0.010712 | 1.1E-06  | 1.92E-05 |
| 216504_s_at | SLC39A8      | -0.00868 | 0.011139 | 0.048764 |
| 216505_x_at |              | 0.00823  | 0.000185 | 0.001672 |
| 216510_x_at | IGHA1        | 0.022544 | 6.22E-08 | 1.47E-06 |
| 216515_x_at | MIR1244-1    | 0.008    | 2.14E-07 | 4.48E-06 |
| 216526_x_at | HLA-C        | 0.008216 | 3.17E-05 | 0.000366 |
| 216541_x_at | IGHG1        | 0.011609 | 5.63E-06 | 8.01E-05 |
| 216542_x_at | IGHA1        | 0.028509 | 9.05E-10 | 3.78E-08 |
| 216557_x_at | IGHA1        | 0.029738 | 2.07E-09 | 7.71E-08 |
| 216559_x_at | HNRNPA1      | 0.002199 | 0.006624 | 0.032225 |
| 216560_x_at | IGL@         | 0.018522 | 7.77E-09 | 2.41E-07 |
| 216563_at   | ANKRD12      | 0.004616 | 0.005991 | 0.029782 |
| 216565_x_at |              | 0.017108 | 9.59E-10 | 3.95E-08 |
| 216566_at   |              | 0.010543 | 3.82E-05 | 0.000431 |
| 216576_x_at | IGK@         | 0.036696 | 2.02E-10 | 1.09E-08 |
| 216595_at   | FAM186A      | -0.02064 | 6.4E-05  | 0.000673 |
| 216598_s_at | CCL2         | 0.020491 | 4.21E-05 | 0.000468 |
| 216599_x_at | SLC22A6      | -0.02945 | 1.1E-08  | 3.22E-07 |
| 216600_x_at | ALDOB        | -0.02224 | 3.1E-07  | 6.21E-06 |
| 216603_at   | SLC7A8       | -0.0254  | 0.000177 | 0.00161  |
| 216604_s_at | SLC7A8       | -0.0243  | 9.05E-09 | 2.74E-07 |
| 216605_s_at | CEACAM21     | 0.00506  | 0.010096 | 0.04511  |
| 216609_at   | TXN          | -0.00947 | 7.28E-09 | 2.28E-07 |
| 216611_s_at | SLC6A2       | -0.00447 | 0.009364 | 0.042391 |
| 216632_at   | NAV3         | 0.005652 | 0.008608 | 0.039614 |
| 216633_s_at | PLCH1        | 0.005266 | 0.000862 | 0.006165 |
| 216638_s_at | PRLR         | -0.02773 | 1.29E-10 | 7.5E-09  |
| 216663_s_at | ZMYND10      | 0.005476 | 0.000961 | 0.006725 |
| 216681_at   |              | 0.005608 | 0.008542 | 0.03939  |
| 216693_x_at | HDGFRP3      | 0.006195 | 0.006018 | 0.02988  |
| 216696_s_at | PRODH2       | -0.02609 | 1.47E-07 | 3.18E-06 |
| 216699_s_at | KLK1         | -0.01536 | 0.000254 | 0.002195 |
| 216708_x_at | LOC100287927 | 0.025057 | 5.72E-11 | 3.77E-09 |
| 216714_at   | CCL13        | 0.010138 | 0.000127 | 0.001213 |
| 216733_s_at | GATM         | -0.01794 | 1.01E-10 | 6.11E-09 |
| 216738_at   |              | 0.006158 | 0.002691 | 0.015609 |
| 216806_at   |              | 0.005802 | 9.38E-05 | 0.000938 |
| 216823_at   | RPS3A        | 0.006434 | 0.000279 | 0.002369 |
| 216829_at   | IGK@         | 0.006365 | 0.001378 | 0.009013 |
| 216831_s_at | RUNX1T1      | 0.007193 | 0.000295 | 0.002482 |
| 216834_at   | RGS1         | 0.017097 | 1.59E-05 | 0.000197 |
| 216835_s_at | DOK1         | 0.008205 | 3.03E-06 | 4.63E-05 |
| 216840_s_at | LAMA2        | 0.009644 | 0.001065 | 0.007302 |
| 216852_x_at | IGL@         | 0.017651 | 3.71E-08 | 9.39E-07 |

|             |               |          |          |          |
|-------------|---------------|----------|----------|----------|
| 216853_x_at | IGLV3-19      | 0.015491 | 2.58E-09 | 9.33E-08 |
| 216865_at   | COL14A1       | 0.017284 | 3.68E-09 | 1.25E-07 |
| 216866_s_at | COL14A1       | 0.021042 | 3.61E-09 | 1.22E-07 |
| 216874_at   | DKFZp686O1327 | -0.00614 | 0.009975 | 0.044616 |
| 216878_x_at | HAB1          | -0.00492 | 0.007559 | 0.035868 |
| 216885_s_at | DCAF8         | -0.00479 | 0.003016 | 0.017138 |
| 216886_at   | CHRNA4        | -0.01481 | 2.51E-07 | 5.14E-06 |
| 216889_s_at | HNF4A         | -0.01487 | 1.25E-06 | 2.12E-05 |
| 216892_at   | IGHG1         | 0.005045 | 0.002558 | 0.014978 |
| 216901_s_at | IKZF1         | 0.003931 | 0.007847 | 0.036864 |
| 216903_s_at | CBARA1        | -0.01695 | 3.17E-11 | 2.33E-09 |
| 216910_at   | XPNPEP2       | -0.04618 | 1.75E-13 | 2.71E-11 |
| 216920_s_at | TARP          | 0.007416 | 0.006359 | 0.031231 |
| 216944_s_at | ITPR1         | -0.00667 | 0.003651 | 0.020063 |
| 216945_x_at | PASK          | 0.005456 | 0.002081 | 0.012661 |
| 216946_at   | HLA-DOA       | 0.003658 | 0.007895 | 0.037028 |
| 216951_at   | FCGR1A        | 0.005798 | 0.005032 | 0.026003 |
| 216953_s_at | WT1           | -0.00926 | 0.004669 | 0.024506 |
| 216954_x_at | ATP5O         | -0.00309 | 0.002852 | 0.016357 |
| 216958_s_at | IVD           | -0.00927 | 0.000271 | 0.00231  |
| 216961_s_at | RPAIN         | -0.00608 | 0.000398 | 0.003214 |
| 216962_at   | RPAIN         | -0.01248 | 1.02E-10 | 6.13E-09 |
| 216969_s_at | KIF22         | 0.006078 | 0.001059 | 0.007269 |
| 216973_s_at | HOXB7         | 0.007971 | 0.008409 | 0.038954 |
| 216984_x_at | IGLV2-23      | 0.020552 | 2.13E-09 | 7.9E-08  |
| 216985_s_at | STX3          | -0.0085  | 0.000244 | 0.002123 |
| 216986_s_at | IRF4          | 0.006101 | 0.007707 | 0.036422 |
| 216988_s_at | PTP4A2        | 0.005188 | 0.001503 | 0.009672 |
| 217014_s_at | AZGP1         | -0.03332 | 1.97E-08 | 5.4E-07  |
| 217022_s_at | IGHA1         | 0.045687 | 4.12E-11 | 2.87E-09 |
| 217023_x_at | TPSAB1        | 0.021925 | 1.95E-13 | 2.94E-11 |
| 217028_at   | CXCR4         | 0.030596 | 3.76E-10 | 1.81E-08 |
| 217034_at   |               | 0.00551  | 0.002267 | 0.013576 |
| 217036_at   |               | 0.018188 | 8.06E-09 | 2.48E-07 |
| 217053_x_at | ETV1          | 0.007298 | 0.000288 | 0.002438 |
| 217061_s_at | ETV1          | 0.007267 | 0.000104 | 0.001025 |
| 217106_x_at | DIMT1L        | 0.005798 | 0.005424 | 0.02755  |
| 217118_s_at | C22orf9       | 0.006166 | 0.00082  | 0.00591  |
| 217127_at   | CTH           | -0.01777 | 3.26E-09 | 1.13E-07 |
| 217133_x_at | CYP2B6        | -0.01154 | 5.03E-05 | 0.000549 |
| 217138_x_at |               | 0.045242 | 7.37E-10 | 3.15E-08 |
| 217140_s_at | VDAC1         | -0.00721 | 4.21E-06 | 6.2E-05  |
| 217143_s_at | TRD@          | 0.005513 | 0.007569 | 0.035907 |
| 217147_s_at | TRAT1         | 0.007984 | 0.005672 | 0.028503 |
| 217148_x_at |               | 0.035281 | 6.07E-11 | 3.95E-09 |
| 217156_at   |               | -0.0048  | 0.011106 | 0.048654 |
| 217157_x_at | IGK@          | 0.026032 | 1.5E-10  | 8.5E-09  |
| 217159_x_at | SIGLEC7       | 0.005452 | 0.001935 | 0.011933 |
| 217167_x_at | GK            | -0.02202 | 1.44E-08 | 4.12E-07 |

|             |              |          |          |          |
|-------------|--------------|----------|----------|----------|
| 217178_at   | RARG         | 0.005396 | 0.01046  | 0.046418 |
| 217179_x_at |              | 0.014826 | 1.46E-07 | 3.17E-06 |
| 217180_at   |              | 0.010783 | 2.82E-06 | 4.33E-05 |
| 217192_s_at | PRDM1        | 0.012674 | 1.7E-05  | 0.00021  |
| 217193_x_at |              | 0.01504  | 3.44E-07 | 6.8E-06  |
| 217218_at   | WAPAL        | -0.00519 | 0.005191 | 0.026604 |
| 217222_at   | IGHG1        | 0.015453 | 1.81E-05 | 0.000223 |
| 217225_x_at | NOMO1        | -0.00435 | 0.002844 | 0.01633  |
| 217227_x_at | IGLV1-40     | 0.010005 | 7.01E-06 | 9.71E-05 |
| 217235_x_at | IGLL5        | 0.028804 | 3.2E-12  | 3.31E-10 |
| 217236_x_at | IGHA1        | 0.008628 | 6.74E-06 | 9.38E-05 |
| 217238_s_at | ALDOB        | -0.02252 | 2.17E-08 | 5.86E-07 |
| 217239_x_at | LOC100508797 | 0.012414 | 2.14E-05 | 0.000258 |
| 217248_s_at | SLC7A8       | -0.0315  | 2E-09    | 7.52E-08 |
| 217251_x_at |              | 0.027248 | 1.6E-08  | 4.49E-07 |
| 217256_x_at |              | 0.004449 | 0.00068  | 0.005064 |
| 217257_at   | SH3BP2       | -0.01868 | 1.03E-10 | 6.2E-09  |
| 217258_x_at | IGLV1-40     | 0.014634 | 1.15E-07 | 2.58E-06 |
| 217260_x_at | IGHG1        | 0.028887 | 1.07E-09 | 4.3E-08  |
| 217281_x_at | IGHA1        | 0.027505 | 4.13E-09 | 1.38E-07 |
| 217288_at   |              | -0.015   | 9.36E-09 | 2.82E-07 |
| 217313_at   |              | 0.007909 | 9.03E-06 | 0.000121 |
| 217319_x_at | CYP4A22      | -0.02457 | 1.86E-10 | 1.02E-08 |
| 217320_at   |              | 0.008845 | 0.00128  | 0.008455 |
| 217328_at   |              | 0.006953 | 1.19E-06 | 2.04E-05 |
| 217336_at   | RPS10        | 0.003614 | 0.011379 | 0.049482 |
| 217352_at   |              | -0.00496 | 0.006803 | 0.032941 |
| 217356_s_at | PGK1         | -0.00742 | 0.002071 | 0.012612 |
| 217360_x_at | IGHA1        | 0.010443 | 8.42E-06 | 0.000114 |
| 217362_x_at | HLA-DRB6     | 0.010973 | 5.65E-05 | 0.000606 |
| 217367_s_at | ZHX3         | -0.00757 | 0.009877 | 0.044282 |
| 217369_at   | IGHG1        | 0.006032 | 0.004364 | 0.023175 |
| 217378_x_at |              | 0.030966 | 1.17E-09 | 4.65E-08 |
| 217379_at   |              | 0.004732 | 0.008485 | 0.039182 |
| 217384_x_at | IGHV3-48     | 0.006249 | 0.000658 | 0.004937 |
| 217388_s_at | KYNU         | -0.01964 | 1.38E-08 | 3.97E-07 |
| 217408_at   | MRPS18B      | -0.00554 | 0.000242 | 0.002105 |
| 217416_x_at |              | -0.00446 | 0.001386 | 0.009054 |
| 217418_x_at | MS4A1        | 0.023405 | 3.34E-07 | 6.66E-06 |
| 217419_x_at | AGRN         | 0.010064 | 0.000171 | 0.001568 |
| 217422_s_at | CD22         | 0.008276 | 0.000207 | 0.001843 |
| 217427_s_at | HIRA         | -0.01134 | 0.000183 | 0.001663 |
| 217436_x_at | HLA-A        | 0.009051 | 0.001634 | 0.010359 |
| 217444_at   |              | -0.0034  | 0.010756 | 0.047446 |
| 217455_s_at | SSTR2        | -0.00903 | 0.001677 | 0.01059  |
| 217456_x_at | HLA-E        | 0.009119 | 0.00013  | 0.001238 |
| 217463_s_at | C11orf9      | 0.007691 | 0.000731 | 0.005376 |
| 217465_at   | NCKAP1       | -0.00563 | 0.007478 | 0.035582 |
| 217478_s_at | HLA-DMA      | 0.015894 | 0.000212 | 0.001876 |

|             |          |          |          |          |
|-------------|----------|----------|----------|----------|
| 217480_x_at | IGKC     | 0.024252 | 1.69E-08 | 4.7E-07  |
| 217483_at   | FOLH1    | -0.02236 | 5.2E-12  | 5.04E-10 |
| 217487_x_at | FOLH1    | -0.014   | 1.36E-05 | 0.000172 |
| 217491_x_at | COX7C    | -0.00349 | 0.000376 | 0.003054 |
| 217492_s_at | PTEN     | 0.00484  | 0.002641 | 0.015396 |
| 217496_s_at | IDE      | -0.00575 | 0.003118 | 0.017608 |
| 217501_at   | CIAO1    | -0.00991 | 0.000158 | 0.001463 |
| 217502_at   | IFIT2    | 0.006494 | 0.002548 | 0.014928 |
| 217503_at   | STK17B   | 0.0217   | 3.21E-09 | 1.12E-07 |
| 217504_at   | ABCA6    | 0.012232 | 0.000503 | 0.003943 |
| 217511_at   | KAZALD1  | 0.005439 | 0.00298  | 0.016976 |
| 217512_at   | KNG1     | -0.02352 | 6.7E-10  | 2.91E-08 |
| 217513_at   | C17orf60 | 0.007496 | 0.000477 | 0.003756 |
| 217517_x_at | SRPK2    | 0.004366 | 0.003546 | 0.019568 |
| 217526_at   | NFATC2IP | -0.0071  | 0.003827 | 0.020832 |
| 217530_at   | SLC34A1  | -0.02854 | 3.2E-11  | 2.34E-09 |
| 217534_at   | FAM49B   | 0.006166 | 0.003821 | 0.020805 |
| 217555_at   | SMC1A    | -0.00659 | 0.001052 | 0.007235 |
| 217583_at   | PAH      | -0.02181 | 5.91E-08 | 1.41E-06 |
| 217595_at   | GSPT1    | -0.00648 | 0.006471 | 0.031654 |
| 217599_s_at | MDFIC    | 0.0053   | 0.001912 | 0.01181  |
| 217605_at   | USP27X   | -0.00491 | 0.003647 | 0.020048 |
| 217606_at   |          | -0.00665 | 0.007308 | 0.034951 |
| 217612_at   | TIMM50   | -0.00689 | 0.006643 | 0.032297 |
| 217645_at   | COX16    | -0.00763 | 0.000914 | 0.006474 |
| 217647_at   |          | -0.00783 | 0.005578 | 0.028145 |
| 217728_at   | S100A6   | 0.021648 | 1.78E-14 | 4.46E-12 |
| 217733_s_at | TMSB10   | 0.022282 | 2.29E-08 | 6.13E-07 |
| 217736_s_at | EIF2AK1  | -0.00593 | 0.005673 | 0.028503 |
| 217737_x_at | C20orf43 | -0.00495 | 0.006109 | 0.030211 |
| 217744_s_at | PERP     | 0.010027 | 9.73E-05 | 0.000968 |
| 217747_s_at | RPS9     | 0.017188 | 0.008154 | 0.038008 |
| 217748_at   | ADIPOR1  | -0.00573 | 0.00021  | 0.001865 |
| 217751_at   | GSTK1    | -0.0083  | 4.12E-05 | 0.000461 |
| 217752_s_at | CNDP2    | -0.00817 | 1.76E-09 | 6.63E-08 |
| 217754_at   | DDX56    | -0.00712 | 3.05E-05 | 0.000353 |
| 217755_at   | HN1      | 0.009102 | 8.21E-05 | 0.000834 |
| 217757_at   | A2M      | 0.015913 | 3.42E-07 | 6.77E-06 |
| 217761_at   | ADI1     | -0.01263 | 9.99E-07 | 1.76E-05 |
| 217762_s_at | RAB31    | 0.01502  | 4.3E-08  | 1.08E-06 |
| 217763_s_at | RAB31    | 0.012501 | 4.03E-05 | 0.000453 |
| 217764_s_at | RAB31    | 0.011009 | 0.000267 | 0.002288 |
| 217767_at   | C3       | 0.02713  | 3.32E-08 | 8.5E-07  |
| 217772_s_at | MTCH2    | -0.01116 | 1.26E-09 | 4.97E-08 |
| 217773_s_at | NDUFA4   | -0.00334 | 0.007189 | 0.034503 |
| 217775_s_at | RDH11    | -0.00891 | 2.27E-07 | 4.72E-06 |
| 217776_at   | RDH11    | -0.00736 | 5.81E-05 | 0.000622 |
| 217777_s_at | PTPLAD1  | -0.00854 | 0.003965 | 0.021448 |
| 217782_s_at | GPS1     | -0.00822 | 0.000369 | 0.003    |

|             |          |          |          |          |
|-------------|----------|----------|----------|----------|
| 217788_s_at | GALNT2   | -0.00939 | 6.85E-05 | 0.000713 |
| 217792_at   | SNX5     | -0.00914 | 8.93E-07 | 1.59E-05 |
| 217794_at   | PRR13    | -0.00605 | 2.75E-06 | 4.25E-05 |
| 217795_s_at | TMEM43   | 0.00826  | 0.000266 | 0.002275 |
| 217796_s_at | NPLOC4   | -0.01004 | 0.000103 | 0.001015 |
| 217806_s_at | POLDIP2  | -0.00689 | 0.001786 | 0.011163 |
| 217807_s_at | GLTSCR2  | 0.004168 | 0.003784 | 0.020638 |
| 217808_s_at | MAPKAP1  | -0.01036 | 5.2E-07  | 9.82E-06 |
| 217809_at   | BZW2     | 0.00674  | 0.000318 | 0.002646 |
| 217820_s_at | ENAH     | 0.008758 | 0.000752 | 0.005495 |
| 217823_s_at | UBE2J1   | 0.005324 | 0.003526 | 0.019471 |
| 217830_s_at | NSFL1C   | -0.00581 | 0.003104 | 0.017559 |
| 217838_s_at | EVL      | 0.010336 | 1.4E-06  | 2.33E-05 |
| 217839_at   | TFG      | -0.0048  | 0.005205 | 0.026656 |
| 217844_at   | CTDSP1   | -0.00572 | 0.005691 | 0.028564 |
| 217850_at   | GNL3     | 0.00857  | 7.77E-06 | 0.000106 |
| 217853_at   | TNS3     | -0.00712 | 0.001881 | 0.011643 |
| 217860_at   | NDUFA10  | -0.00728 | 0.006258 | 0.030797 |
| 217861_s_at | PREB     | -0.00536 | 0.001088 | 0.007436 |
| 217864_s_at | PIAS1    | 0.007486 | 0.002903 | 0.016603 |
| 217866_at   | CPSF7    | -0.00647 | 6.74E-05 | 0.000704 |
| 217868_s_at | METTL9   | -0.0052  | 0.001505 | 0.009676 |
| 217869_at   | HSD17B12 | -0.00334 | 0.002298 | 0.013711 |
| 217874_at   | SUCLG1   | -0.01732 | 1.19E-15 | 5.62E-13 |
| 217882_at   | TMEM111  | -0.00646 | 0.008045 | 0.037586 |
| 217889_s_at | CYBRD1   | 0.012291 | 0.000302 | 0.002531 |
| 217895_at   | PTCD3    | -0.00521 | 0.002367 | 0.014055 |
| 217900_at   | IARS2    | -0.01047 | 2.54E-08 | 6.73E-07 |
| 217904_s_at | BACE1    | -0.00681 | 0.001346 | 0.008831 |
| 217906_at   | KLHDC2   | -0.00805 | 1.35E-05 | 0.00017  |
| 217910_x_at | MLX      | -0.00604 | 0.000604 | 0.004579 |
| 217911_s_at | BAG3     | -0.01536 | 9.35E-08 | 2.14E-06 |
| 217912_at   | DUS1L    | -0.00626 | 0.00179  | 0.011182 |
| 217913_at   | VPS4A    | -0.00637 | 0.000466 | 0.003686 |
| 217914_at   | TPCN1    | -0.01383 | 2.32E-08 | 6.2E-07  |
| 217915_s_at | RSL24D1  | 0.007192 | 0.000293 | 0.00247  |
| 217925_s_at | C6orf106 | -0.00723 | 0.000199 | 0.001779 |
| 217931_at   | CNPY3    | 0.010128 | 0.000324 | 0.002689 |
| 217933_s_at | LAP3     | -0.00923 | 6.46E-07 | 1.19E-05 |
| 217935_s_at | UQCC     | -0.01043 | 6.9E-06  | 9.56E-05 |
| 217939_s_at | AFTPH    | -0.00584 | 0.00095  | 0.006665 |
| 217940_s_at | CARKD    | -0.0073  | 1.5E-07  | 3.25E-06 |
| 217942_at   | MRPS35   | -0.00838 | 2.54E-05 | 0.0003   |
| 217944_at   | POMGNT1  | -0.00761 | 6.67E-07 | 1.22E-05 |
| 217946_s_at | SAE1     | 0.004064 | 0.01132  | 0.049303 |
| 217947_at   | CMTM6    | 0.007629 | 4.77E-05 | 0.000524 |
| 217955_at   | BCL2L13  | -0.01153 | 1.59E-06 | 2.62E-05 |
| 217961_at   | SLC25A38 | -0.00643 | 0.002779 | 0.016017 |
| 217964_at   | TTC19    | -0.00712 | 3.32E-05 | 0.000382 |

|             |          |          |          |          |
|-------------|----------|----------|----------|----------|
| 217966_s_at | FAM129A  | 0.021181 | 6.68E-10 | 2.91E-08 |
| 217967_s_at | FAM129A  | 0.016423 | 1.05E-08 | 3.1E-07  |
| 217968_at   | TSSC1    | -0.00483 | 0.001393 | 0.009076 |
| 217972_at   | CHCHD3   | -0.00438 | 0.003373 | 0.018797 |
| 217973_at   | DCXR     | -0.02638 | 2.63E-12 | 2.79E-10 |
| 217974_at   | TM7SF3   | -0.01606 | 0.000226 | 0.001988 |
| 217976_s_at | DYNC1LI1 | -0.00631 | 0.001732 | 0.010883 |
| 217977_at   | SEPX1    | -0.01848 | 2.05E-08 | 5.58E-07 |
| 217979_at   | TSPAN13  | 0.013087 | 5.11E-05 | 0.000555 |
| 217980_s_at | MRPL16   | -0.00753 | 3.49E-06 | 5.24E-05 |
| 217984_at   | RNASET2  | 0.01197  | 5.44E-08 | 1.31E-06 |
| 217985_s_at | BAZ1A    | 0.008437 | 0.001035 | 0.007148 |
| 217986_s_at | BAZ1A    | 0.011957 | 7.59E-05 | 0.000781 |
| 217988_at   | CCNB1IP1 | -0.0065  | 0.000777 | 0.005641 |
| 217989_at   | HSD17B11 | -0.00761 | 0.00144  | 0.009323 |
| 218002_s_at | CXCL14   | -0.0099  | 0.002801 | 0.016125 |
| 218003_s_at | FKBP3    | 0.003064 | 0.00896  | 0.040936 |
| 218019_s_at | PDXK     | -0.0115  | 2.07E-05 | 0.00025  |
| 218021_at   | DHRS4    | -0.02139 | 3.11E-06 | 4.72E-05 |
| 218022_at   | VRK3     | -0.00882 | 0.001775 | 0.011108 |
| 218024_at   | BRP44L   | -0.00847 | 3.67E-05 | 0.000416 |
| 218025_s_at | PECI     | -0.01555 | 9.46E-10 | 3.93E-08 |
| 218035_s_at | RBM47    | -0.00978 | 1.24E-06 | 2.11E-05 |
| 218049_s_at | MRPL13   | -0.00673 | 0.002307 | 0.013754 |
| 218057_x_at | COX4NB   | -0.00581 | 0.003474 | 0.019255 |
| 218066_at   | SLC12A7  | -0.00821 | 2.81E-06 | 4.33E-05 |
| 218068_s_at | ZNF672   | -0.0071  | 0.000519 | 0.004043 |
| 218069_at   | DCTPP1   | 0.0047   | 0.006418 | 0.031448 |
| 218071_s_at | MKRN2    | -0.00815 | 2.69E-05 | 0.000315 |
| 218072_at   | COMMD9   | -0.00664 | 0.002811 | 0.016172 |
| 218084_x_at | FXDY5    | 0.021566 | 7.56E-09 | 2.35E-07 |
| 218086_at   | NPDC1    | 0.011158 | 1.16E-06 | 1.99E-05 |
| 218094_s_at | DBNDD2   | 0.011705 | 1.45E-05 | 0.000183 |
| 218096_at   | AGPAT5   | -0.00734 | 0.000944 | 0.006635 |
| 218098_at   | ARFGEF2  | -0.00647 | 0.00013  | 0.001236 |
| 218099_at   | TEX2     | -0.01129 | 4.77E-08 | 1.18E-06 |
| 218102_at   | DERA     | -0.01338 | 1.02E-13 | 1.7E-11  |
| 218112_at   | MRPS34   | -0.00557 | 0.009476 | 0.042788 |
| 218116_at   | C9orf78  | -0.00557 | 9.75E-06 | 0.000129 |
| 218124_at   | RETSAT   | -0.01221 | 7.31E-09 | 2.29E-07 |
| 218126_at   | FAM82A2  | -0.00792 | 6.81E-05 | 0.00071  |
| 218132_s_at | TSEN34   | -0.0049  | 0.005778 | 0.028894 |
| 218138_at   | MKKS     | -0.00678 | 0.005974 | 0.029706 |
| 218139_s_at | MUDENG   | -0.00756 | 0.005165 | 0.026531 |
| 218145_at   | TRIB3    | 0.005187 | 0.005309 | 0.027096 |
| 218150_at   | ARL5A    | -0.00633 | 0.004868 | 0.025339 |
| 218157_x_at | CDC42SE1 | 0.008489 | 0.001716 | 0.010802 |
| 218162_at   | OLFML3   | 0.012775 | 1.08E-05 | 0.00014  |
| 218165_at   | MEAF6    | 0.005273 | 0.002509 | 0.014729 |

|             |            |          |          |          |
|-------------|------------|----------|----------|----------|
| 218167_at   | AMZ2       | -0.00909 | 1.45E-07 | 3.15E-06 |
| 218168_s_at | ADCK3      | -0.01194 | 4.09E-06 | 6.04E-05 |
| 218170_at   | ISOC1      | -0.0081  | 6.38E-05 | 0.000672 |
| 218175_at   | CCDC92     | -0.00541 | 0.001211 | 0.00809  |
| 218182_s_at | CLDN1      | 0.021457 | 1.7E-08  | 4.73E-07 |
| 218192_at   | IP6K2      | 0.007097 | 2.51E-06 | 3.92E-05 |
| 218194_at   | REXO2      | -0.00846 | 1.28E-08 | 3.7E-07  |
| 218195_at   | C6orf211   | -0.00591 | 0.0016   | 0.010186 |
| 218204_s_at | FYCO1      | -0.00637 | 0.00186  | 0.011534 |
| 218205_s_at | MKNK2      | -0.00468 | 0.008362 | 0.038753 |
| 218208_at   | PQLC1      | -0.00579 | 0.011459 | 0.049801 |
| 218211_s_at | MLPH       | 0.008656 | 0.00113  | 0.007659 |
| 218217_at   | SCPEP1     | -0.00646 | 0.004959 | 0.025716 |
| 218219_s_at | LANCL2     | -0.01069 | 0.000316 | 0.002633 |
| 218223_s_at | PLEKHO1    | 0.009884 | 3.86E-06 | 5.73E-05 |
| 218225_at   | ECSIT      | -0.00644 | 0.001434 | 0.009292 |
| 218231_at   | NAGK       | 0.010692 | 0.003471 | 0.019245 |
| 218232_at   | C1QA       | 0.014356 | 2.14E-07 | 4.48E-06 |
| 218237_s_at | SLC38A1    | 0.012081 | 0.000741 | 0.005438 |
| 218245_at   | TSKU       | -0.01777 | 5.44E-11 | 3.64E-09 |
| 218249_at   | ZDHHC6     | -0.00426 | 0.007755 | 0.036589 |
| 218253_s_at | LGTN       | -0.00573 | 0.002439 | 0.014412 |
| 218254_s_at | SAR1B      | -0.01021 | 4.89E-07 | 9.31E-06 |
| 218261_at   | AP1M2      | -0.00846 | 0.006476 | 0.031671 |
| 218264_at   | BCCIP      | -0.00799 | 0.000724 | 0.005339 |
| 218270_at   | MRPL24     | -0.00502 | 0.002428 | 0.014372 |
| 218272_at   | TTC38      | -0.01609 | 1.38E-09 | 5.36E-08 |
| 218274_s_at | ANKZF1     | 0.005366 | 0.00637  | 0.031272 |
| 218275_at   | SLC25A10   | -0.01396 | 2.6E-10  | 1.33E-08 |
| 218279_s_at | HIST2H2AA3 | 0.011457 | 0.002122 | 0.012834 |
| 218285_s_at | BDH2       | -0.01124 | 1.62E-09 | 6.17E-08 |
| 218289_s_at | UBA5       | -0.00556 | 0.003248 | 0.018217 |
| 218292_s_at | PRKAG2     | -0.00652 | 0.002207 | 0.013255 |
| 218298_s_at | C14orf159  | -0.00668 | 0.000435 | 0.003472 |
| 218307_at   | RSAD1      | -0.00865 | 6.9E-05  | 0.000718 |
| 218308_at   | TACC3      | 0.00535  | 0.000987 | 0.006872 |
| 218309_at   | CAMK2N1    | -0.00412 | 0.000609 | 0.004609 |
| 218313_s_at | GALNT7     | 0.007663 | 0.001247 | 0.008283 |
| 218316_at   | TIMM9      | -0.00567 | 0.002468 | 0.014544 |
| 218322_s_at | ACSL5      | 0.011617 | 1.26E-09 | 4.96E-08 |
| 218326_s_at | LGR4       | -0.00553 | 0.010932 | 0.048067 |
| 218328_at   | COQ4       | -0.0065  | 0.004344 | 0.0231   |
| 218329_at   | PRDM4      | -0.00926 | 0.000899 | 0.006395 |
| 218341_at   | PPCS       | -0.00393 | 0.004869 | 0.025339 |
| 218345_at   | TMEM176A   | -0.00999 | 0.003785 | 0.020641 |
| 218352_at   | RCBTB1     | -0.00728 | 0.008742 | 0.040104 |
| 218355_at   | KIF4A      | 0.004839 | 0.010252 | 0.045631 |
| 218375_at   | NUDT9      | -0.00746 | 0.002412 | 0.014295 |
| 218377_s_at | RWDD2B     | -0.00547 | 0.000105 | 0.001035 |

|             |           |          |          |          |
|-------------|-----------|----------|----------|----------|
| 218380_at   | LOC728392 | 0.011447 | 2.78E-06 | 4.29E-05 |
| 218392_x_at | SFXN1     | -0.01371 | 8.16E-13 | 1.07E-10 |
| 218394_at   | ROGDI     | -0.01073 | 0.000887 | 0.006328 |
| 218398_at   | MRPS30    | -0.00644 | 5.71E-06 | 8.11E-05 |
| 218400_at   | OAS3      | 0.010954 | 2.23E-05 | 0.000267 |
| 218402_s_at | HPS4      | -0.00891 | 0.001863 | 0.011546 |
| 218418_s_at | KANK2     | 0.008837 | 0.000361 | 0.002948 |
| 218438_s_at | MED28     | 0.006569 | 0.007595 | 0.036    |
| 218440_at   | MCCC1     | -0.01408 | 2.01E-14 | 4.79E-12 |
| 218445_at   | H2AFY2    | 0.004822 | 0.009405 | 0.042534 |
| 218447_at   | C16orf61  | -0.00613 | 2.65E-05 | 0.00031  |
| 218451_at   | CDCP1     | 0.009622 | 5.95E-05 | 0.000634 |
| 218455_at   | NFS1      | -0.01141 | 1.5E-08  | 4.28E-07 |
| 218461_at   | GPN3      | -0.00636 | 0.004845 | 0.025254 |
| 218471_s_at | BBS1      | -0.00726 | 6.34E-05 | 0.00067  |
| 218477_at   | TMEM14A   | -0.00717 | 0.000596 | 0.004531 |
| 218480_at   | AGBL5     | -0.00839 | 0.004895 | 0.025428 |
| 218487_at   | ALAD      | -0.01903 | 1.75E-11 | 1.4E-09  |
| 218489_s_at | ALAD      | -0.01578 | 7.35E-06 | 0.000101 |
| 218494_s_at | SLC2A4RG  | -0.01314 | 4.91E-05 | 0.000537 |
| 218499_at   | MST4      | 0.009208 | 0.006985 | 0.033712 |
| 218500_at   | C8orf55   | -0.00395 | 0.006683 | 0.032455 |
| 218502_s_at | TRPS1     | -0.00705 | 0.000605 | 0.004588 |
| 218504_at   | FAHD2A    | -0.00779 | 0.003531 | 0.019492 |
| 218505_at   | WDR59     | -0.00611 | 0.000536 | 0.004155 |
| 218510_x_at | FAM134B   | -0.00735 | 0.005145 | 0.026459 |
| 218511_s_at | PNPO      | -0.01557 | 2.27E-09 | 8.36E-08 |
| 218512_at   | WDR12     | -0.00909 | 0.000322 | 0.002677 |
| 218521_s_at | UBE2W     | -0.00679 | 0.000054 | 0.004176 |
| 218523_at   | LHPP      | -0.01347 | 2.45E-06 | 3.84E-05 |
| 218532_s_at | FAM134B   | -0.00712 | 8.83E-05 | 0.00089  |
| 218536_at   | MRS2      | -0.00586 | 0.001999 | 0.01226  |
| 218538_s_at | MRS2      | -0.00517 | 0.003788 | 0.020652 |
| 218541_s_at | C8orf4    | 0.011696 | 7.08E-05 | 0.000735 |
| 218546_at   | C1orf115  | -0.01414 | 4.15E-10 | 1.95E-08 |
| 218547_at   | DHDDS     | -0.00651 | 2.12E-05 | 0.000256 |
| 218549_s_at | FAM82B    | -0.00774 | 3.08E-05 | 0.000357 |
| 218552_at   | ECHDC2    | -0.01274 | 2.52E-09 | 9.15E-08 |
| 218557_at   | NIT2      | -0.01281 | 5.63E-06 | 8.01E-05 |
| 218558_s_at | MRPL39    | -0.00483 | 0.011175 | 0.048871 |
| 218559_s_at | MAFB      | 0.01029  | 0.000283 | 0.002403 |
| 218563_at   | NDUFA3    | -0.0074  | 1.09E-05 | 0.000142 |
| 218565_at   | C9orf114  | -0.01253 | 1.21E-07 | 2.69E-06 |
| 218567_x_at | DPP3      | -0.00605 | 0.001945 | 0.011991 |
| 218576_s_at | DUSP12    | 0.006912 | 0.0003   | 0.002515 |
| 218579_s_at | DHX35     | -0.007   | 0.004819 | 0.02514  |
| 218580_x_at | AURKAIP1  | -0.00524 | 0.005174 | 0.026546 |
| 218592_s_at | CECR5     | -0.00992 | 1.43E-05 | 0.000181 |
| 218596_at   | TBC1D13   | -0.01894 | 1.07E-11 | 9.41E-10 |



|             |          |          |          |          |
|-------------|----------|----------|----------|----------|
| 218597_s_at | CISD1    | -0.0087  | 7.23E-11 | 4.6E-09  |
| 218600_at   | LIMD2    | 0.009068 | 9.19E-06 | 0.000122 |
| 218601_at   | URGCP    | -0.00646 | 0.000406 | 0.003272 |
| 218603_at   | HECA     | 0.007739 | 0.000364 | 0.00297  |
| 218605_at   | TFB2M    | -0.01104 | 4.6E-05  | 0.000507 |
| 218610_s_at | CPPED1   | -0.01128 | 6.6E-08  | 1.55E-06 |
| 218611_at   | IER5     | 0.010713 | 7.53E-05 | 0.000776 |
| 218614_at   | C12orf35 | 0.00958  | 0.000523 | 0.004076 |
| 218618_s_at | FNDC3B   | 0.007876 | 0.002478 | 0.014587 |
| 218620_s_at | HEMK1    | -0.0052  | 0.005761 | 0.028823 |
| 218625_at   | NRN1     | 0.007986 | 0.002678 | 0.015554 |
| 218632_at   | HECTD3   | -0.00826 | 2.31E-08 | 6.19E-07 |
| 218633_x_at | ABHD10   | -0.01215 | 1.67E-07 | 3.59E-06 |
| 218634_at   | PHLDA3   | 0.004363 | 0.007275 | 0.034836 |
| 218638_s_at | SPON2    | 0.009131 | 0.002706 | 0.015672 |
| 218640_s_at | PLEKHF2  | -0.00988 | 8.59E-06 | 0.000115 |
| 218644_at   | PLEK2    | 0.005868 | 0.007322 | 0.035001 |
| 218646_at   | C4orf27  | 0.004217 | 0.006062 | 0.030044 |
| 218653_at   | SLC25A15 | -0.00619 | 0.009241 | 0.041972 |
| 218656_s_at | LHFP     | 0.020423 | 6.67E-10 | 2.91E-08 |
| 218658_s_at | ACTR8    | -0.00847 | 0.000239 | 0.002082 |
| 218660_at   | DYSF     | -0.0073  | 0.000296 | 0.002494 |
| 218661_at   | NAT15    | -0.01489 | 4.6E-10  | 2.14E-08 |
| 218665_at   | FZD4     | -0.01267 | 5.23E-06 | 7.49E-05 |
| 218667_at   | PJA1     | 0.007011 | 0.001162 | 0.007832 |
| 218671_s_at | ATPIF1   | -0.00492 | 0.002469 | 0.014546 |
| 218676_s_at | PCTP     | -0.01432 | 3.78E-07 | 7.36E-06 |
| 218677_at   | S100A14  | 0.011554 | 8.08E-07 | 1.45E-05 |
| 218684_at   | LRRC8D   | -0.01081 | 1.15E-08 | 3.37E-07 |
| 218685_s_at | SMUG1    | -0.00791 | 0.00139  | 0.009066 |
| 218686_s_at | RHBDF1   | 0.005541 | 0.010216 | 0.045516 |
| 218687_s_at | MUC13    | -0.01107 | 0.010744 | 0.047414 |
| 218693_at   | TSPAN15  | 0.008546 | 3.27E-06 | 4.94E-05 |
| 218699_at   | RAB7L1   | -0.01588 | 7.32E-10 | 3.14E-08 |
| 218700_s_at | RAB7L1   | -0.01838 | 8.22E-09 | 2.52E-07 |
| 218701_at   | LACTB2   | -0.01265 | 0.000429 | 0.003432 |
| 218705_s_at | SNX24    | -0.00788 | 0.001859 | 0.011534 |
| 218708_at   | NXT1     | 0.006703 | 0.007909 | 0.037068 |
| 218716_x_at | MTO1     | -0.01075 | 3.47E-08 | 8.85E-07 |
| 218722_s_at | CCDC51   | -0.00636 | 0.000163 | 0.001506 |
| 218723_s_at | C13orf15 | -0.00809 | 0.005624 | 0.028302 |
| 218731_s_at | VWA1     | 0.005534 | 0.005408 | 0.027481 |
| 218747_s_at | TAPBPL   | 0.006249 | 0.00571  | 0.028632 |
| 218756_s_at | DHRS11   | -0.01199 | 0.0003   | 0.002518 |
| 218760_at   | COQ6     | -0.00903 | 1.27E-05 | 0.000162 |
| 218766_s_at | WARS2    | -0.00382 | 0.005678 | 0.028511 |
| 218771_at   | PANK4    | -0.00461 | 0.009296 | 0.042151 |
| 218772_x_at | TMEM38B  | -0.00878 | 0.000772 | 0.005617 |
| 218773_s_at | MSRB2    | -0.01145 | 3.05E-06 | 4.65E-05 |

|             |           |          |          |          |
|-------------|-----------|----------|----------|----------|
| 218776_s_at | TMEM62    | 0.007476 | 0.000832 | 0.00598  |
| 218779_x_at | EPS8L1    | 0.010071 | 0.000108 | 0.001062 |
| 218780_at   | HOOK2     | -0.00632 | 0.00055  | 0.004242 |
| 218789_s_at | C11orf71  | -0.01037 | 9.77E-07 | 1.73E-05 |
| 218796_at   | FERMT1    | -0.00853 | 0.00348  | 0.019274 |
| 218799_at   | GPN2      | -0.00516 | 0.004513 | 0.023824 |
| 218802_at   | CCDC109B  | 0.012595 | 1.18E-05 | 0.000152 |
| 218805_at   | GIMAP5    | 0.0133   | 8.38E-06 | 0.000113 |
| 218820_at   | C14orf132 | 0.006702 | 0.003592 | 0.019794 |
| 218837_s_at | UBE2D4    | -0.00862 | 1.25E-05 | 0.00016  |
| 218841_at   | ASB8      | -0.00477 | 0.004526 | 0.023885 |
| 218843_at   | FNDC4     | 0.004747 | 0.002686 | 0.015598 |
| 218844_at   | ACSF2     | -0.02486 | 7.7E-15  | 2.35E-12 |
| 218845_at   | DUSP22    | 0.008578 | 0.000154 | 0.001437 |
| 218848_at   | THOC6     | 0.004851 | 0.001326 | 0.008723 |
| 218854_at   | DSE       | 0.012374 | 5.73E-05 | 0.000614 |
| 218856_at   | TNFRSF21  | -0.02027 | 1.61E-06 | 2.63E-05 |
| 218857_s_at | ASRGL1    | -0.01102 | 0.002424 | 0.014357 |
| 218858_at   | DEPDC6    | 0.01152  | 2.69E-06 | 4.18E-05 |
| 218862_at   | ASB13     | -0.01615 | 9.85E-07 | 1.74E-05 |
| 218865_at   | MOSC1     | -0.00522 | 0.005136 | 0.02643  |
| 218869_at   | MLYCD     | -0.00909 | 2.49E-05 | 0.000295 |
| 218870_at   | ARHGAP15  | 0.026882 | 4.97E-10 | 2.26E-08 |
| 218872_at   | TESC      | 0.016437 | 8.46E-09 | 2.59E-07 |
| 218873_at   | GON4L     | -0.00686 | 0.000418 | 0.003357 |
| 218884_s_at | GUF1      | -0.00796 | 0.000446 | 0.003551 |
| 218885_s_at | GALNT12   | -0.00621 | 0.003554 | 0.019608 |
| 218893_at   | ISOC2     | -0.01081 | 0.000111 | 0.001085 |
| 218897_at   | TMEM177   | -0.01137 | 6.79E-07 | 1.24E-05 |
| 218898_at   | FAM57A    | 0.008294 | 0.004277 | 0.022811 |
| 218910_at   | ANO10     | -0.00592 | 0.001232 | 0.008211 |
| 218913_s_at | GMIP      | 0.006957 | 9.11E-05 | 0.000915 |
| 218918_at   | MAN1C1    | -0.01201 | 3.23E-05 | 0.000373 |
| 218920_at   | FAM193B   | 0.004365 | 0.010972 | 0.048193 |
| 218921_at   | SIGIRR    | -0.01295 | 7.17E-08 | 1.68E-06 |
| 218927_s_at | CHST12    | 0.004806 | 0.009327 | 0.042249 |
| 218928_s_at | SLC37A1   | 0.007642 | 0.000165 | 0.001523 |
| 218930_s_at | TMEM106B  | -0.00587 | 0.00096  | 0.006721 |
| 218931_at   | RAB17     | -0.01137 | 3.03E-10 | 1.5E-08  |
| 218936_s_at | CCDC59    | 0.005115 | 0.002883 | 0.016512 |
| 218948_at   | QRSL1     | -0.00818 | 0.000208 | 0.001848 |
| 218957_s_at | PAAF1     | -0.01434 | 1.91E-06 | 3.07E-05 |
| 218959_at   | HOXC10    | -0.00498 | 0.010816 | 0.047674 |
| 218960_at   | TMPRSS4   | 0.020583 | 3.87E-12 | 3.92E-10 |
| 218967_s_at | PTER      | -0.01307 | 0.000199 | 0.001779 |
| 218971_s_at | WDR91     | -0.00611 | 0.000559 | 0.004294 |
| 218974_at   | SOBP      | -0.00948 | 0.000979 | 0.006831 |
| 218976_at   | DNAJC12   | -0.01942 | 7.17E-09 | 2.26E-07 |
| 218980_at   | FHOD3     | -0.00991 | 5.19E-05 | 0.000562 |

|             |            |          |          |          |
|-------------|------------|----------|----------|----------|
| 218983_at   | C1RL       | 0.013804 | 1.26E-07 | 2.8E-06  |
| 218986_s_at | DDX60      | 0.008956 | 8.65E-05 | 0.000874 |
| 218988_at   | SLC35E3    | -0.00775 | 0.000601 | 0.004564 |
| 218995_s_at | EDN1       | 0.007245 | 0.008041 | 0.037583 |
| 218997_at   | POLR1E     | 0.006145 | 0.000179 | 0.001628 |
| 219008_at   | C2orf43    | -0.0079  | 0.000131 | 0.001243 |
| 219013_at   | GALNT11    | -0.00847 | 1.1E-06  | 1.91E-05 |
| 219014_at   | PLAC8      | 0.022176 | 2.94E-08 | 7.66E-07 |
| 219016_at   | FASTKD5    | -0.01018 | 0.0012   | 0.008032 |
| 219020_at   | HS1BP3     | -0.00591 | 0.000906 | 0.006438 |
| 219021_at   | RNF121     | -0.00573 | 0.004885 | 0.025385 |
| 219028_at   | HIPK2      | -0.00529 | 0.00094  | 0.006624 |
| 219032_x_at | OPN3       | -0.00821 | 9.97E-06 | 0.000131 |
| 219033_at   | PARP8      | 0.014526 | 2.17E-06 | 3.45E-05 |
| 219034_at   | PARP16     | -0.00448 | 0.010565 | 0.04681  |
| 219036_at   | CEP70      | -0.00845 | 0.000203 | 0.001809 |
| 219044_at   | THNSL2     | -0.00756 | 0.005182 | 0.026572 |
| 219049_at   | CSGALNACT1 | 0.016368 | 1.96E-08 | 5.39E-07 |
| 219054_at   | C5orf23    | -0.02264 | 5.43E-12 | 5.21E-10 |
| 219059_s_at | LYVE1      | 0.010242 | 0.000264 | 0.002267 |
| 219063_at   | C1orf35    | 0.006383 | 0.003289 | 0.018402 |
| 219076_s_at | PXMP2      | -0.02159 | 3.68E-19 | 1.17E-15 |
| 219077_s_at | WWOX       | -0.00713 | 0.002963 | 0.016884 |
| 219079_at   | CYB5R4     | 0.005517 | 0.001193 | 0.007996 |
| 219093_at   | PID1       | 0.011821 | 0.000103 | 0.001018 |
| 219098_at   | MYBBP1A    | 0.004348 | 0.007326 | 0.035014 |
| 219101_x_at | ABHD8      | 0.003788 | 0.006363 | 0.031243 |
| 219103_at   | ASAP3      | -0.01462 | 5.73E-08 | 1.37E-06 |
| 219111_s_at | DDX54      | -0.00639 | 4.21E-05 | 0.000468 |
| 219113_x_at | HSD17B14   | -0.01481 | 1.06E-08 | 3.13E-07 |
| 219114_at   | C3orf18    | -0.00766 | 0.001792 | 0.011186 |
| 219117_s_at | FKBP11     | 0.012278 | 0.000446 | 0.00355  |
| 219118_at   | FKBP11     | 0.014022 | 0.00014  | 0.001318 |
| 219121_s_at | ESRP1      | 0.009265 | 0.003647 | 0.020048 |
| 219127_at   | PRR15L     | 0.008066 | 0.008303 | 0.038535 |
| 219129_s_at | SAP30L     | -0.00703 | 0.00062  | 0.004684 |
| 219133_at   | OXSM       | -0.0115  | 6.49E-05 | 0.000682 |
| 219138_at   | RPL14      | 0.007335 | 0.001727 | 0.010853 |
| 219140_s_at | RBP4       | -0.0269  | 4.56E-07 | 8.76E-06 |
| 219144_at   | DUSP26     | -0.00757 | 0.002977 | 0.016959 |
| 219145_at   | LPHN1      | 0.005642 | 0.005674 | 0.028503 |
| 219147_s_at | C9orf95    | -0.0111  | 3.84E-06 | 5.71E-05 |
| 219159_s_at | SLAMF7     | 0.039733 | 1.33E-07 | 2.93E-06 |
| 219161_s_at | CKLF       | 0.019282 | 1.53E-15 | 6.41E-13 |
| 219166_at   | C14orf104  | -0.00917 | 0.000171 | 0.001567 |
| 219176_at   | C2orf47    | -0.01207 | 1.69E-11 | 1.36E-09 |
| 219177_at   | BRIX1      | 0.004271 | 0.008924 | 0.040828 |
| 219179_at   | DACT1      | 0.013978 | 0.000259 | 0.002232 |
| 219180_s_at | PEX26      | -0.00437 | 0.008198 | 0.038169 |

|             |          |          |          |          |
|-------------|----------|----------|----------|----------|
| 219183_s_at | CYTH4    | 0.010433 | 8.07E-06 | 0.00011  |
| 219185_at   | SIRT5    | -0.00668 | 0.001475 | 0.009508 |
| 219188_s_at | MACROD1  | -0.01502 | 4.39E-13 | 6.08E-11 |
| 219191_s_at | BIN2     | 0.014826 | 4.59E-09 | 1.51E-07 |
| 219194_at   | SEMA4G   | -0.01346 | 1.15E-07 | 2.57E-06 |
| 219195_at   | PPARGC1A | -0.00935 | 3.11E-06 | 4.72E-05 |
| 219200_at   | FASTKD3  | -0.01189 | 2.09E-06 | 3.34E-05 |
| 219203_at   | FAM158A  | -0.00464 | 0.000827 | 0.005949 |
| 219213_at   | JAM2     | 0.01227  | 0.000115 | 0.001113 |
| 219215_s_at | SLC39A4  | -0.01959 | 1.86E-10 | 1.02E-08 |
| 219217_at   | NARS2    | -0.01151 | 4.87E-06 | 7.02E-05 |
| 219220_x_at | MRPS22   | -0.0052  | 0.000131 | 0.001247 |
| 219222_at   | RBKS     | -0.00815 | 0.000452 | 0.003593 |
| 219228_at   | ZNF331   | -0.00809 | 0.003616 | 0.0199   |
| 219229_at   | SLCO3A1  | 0.013715 | 2.79E-06 | 4.3E-05  |
| 219234_x_at | SCRN3    | -0.00686 | 0.002813 | 0.016174 |
| 219238_at   | PIGV     | -0.00555 | 0.005183 | 0.026572 |
| 219243_at   | GIMAP4   | 0.015921 | 1.24E-09 | 4.91E-08 |
| 219244_s_at | MRPL46   | -0.0096  | 0.000256 | 0.002212 |
| 219246_s_at | OGFOD2   | -0.00665 | 0.004401 | 0.023331 |
| 219255_x_at | IL17RB   | -0.01533 | 1.24E-05 | 0.00016  |
| 219257_s_at | SPHK1    | 0.007185 | 0.001342 | 0.008809 |
| 219263_at   | RNF128   | -0.01672 | 1.29E-05 | 0.000164 |
| 219268_at   | ETNK2    | -0.02121 | 1.7E-10  | 9.47E-09 |
| 219277_s_at | OGDHL    | -0.01605 | 1.53E-07 | 3.31E-06 |
| 219279_at   | DOCK10   | 0.016217 | 3.99E-05 | 0.000449 |
| 219281_at   | MSRA     | -0.0239  | 1.14E-16 | 1.06E-13 |
| 219291_at   | DTWD1    | 0.00452  | 0.010279 | 0.045744 |
| 219295_s_at | PCOLCE2  | -0.01305 | 0.010208 | 0.045497 |
| 219296_at   | ZDHHC13  | 0.005729 | 0.002396 | 0.014218 |
| 219298_at   | ECHDC3   | -0.01872 | 1.74E-13 | 2.71E-11 |
| 219307_at   | PDSS2    | -0.01288 | 6.19E-10 | 2.72E-08 |
| 219308_s_at | AK5      | 0.007537 | 0.008436 | 0.039038 |
| 219310_at   | TMEM90B  | -0.00823 | 0.006705 | 0.032555 |
| 219312_s_at | ZBTB10   | -0.00654 | 0.002461 | 0.014518 |
| 219313_at   | GRAMD1C  | -0.00845 | 0.000117 | 0.001129 |
| 219318_x_at | MED31    | -0.00913 | 0.004307 | 0.022935 |
| 219321_at   | MPP5     | -0.00894 | 3.02E-05 | 0.000351 |
| 219332_at   | MICALL2  | 0.006705 | 0.000705 | 0.005225 |
| 219340_s_at | CLN8     | -0.01272 | 7.96E-06 | 0.000108 |
| 219341_at   | CLN8     | -0.0148  | 2.28E-05 | 0.000272 |
| 219350_s_at | DIABLO   | -0.00422 | 0.007151 | 0.034377 |
| 219359_at   | ATHL1    | 0.012986 | 1.09E-06 | 1.89E-05 |
| 219367_s_at |          | 0.011199 | 2.99E-06 | 4.57E-05 |
| 219371_s_at | KLF2     | 0.00973  | 9.86E-05 | 0.000981 |
| 219385_at   | SLAMF8   | 0.006068 | 0.001699 | 0.010712 |
| 219386_s_at | SLAMF8   | 0.013746 | 1.7E-05  | 0.00021  |
| 219387_at   | CCDC88A  | 0.008207 | 0.00081  | 0.005857 |
| 219395_at   | ESRP2    | -0.00911 | 3.85E-06 | 5.71E-05 |

|             |           |          |          |          |
|-------------|-----------|----------|----------|----------|
| 219401_at   | XYLT2     | 0.005084 | 0.006577 | 0.03204  |
| 219411_at   | ELMO3     | -0.00436 | 0.005004 | 0.025887 |
| 219414_at   | CLSTN2    | -0.01173 | 0.001257 | 0.008336 |
| 219416_at   | SCARA3    | 0.007491 | 0.000747 | 0.005466 |
| 219418_at   | NHEJ1     | -0.01181 | 1.38E-07 | 3.02E-06 |
| 219420_s_at | C1orf163  | -0.00966 | 0.005216 | 0.026706 |
| 219439_at   | C1GALT1   | -0.00465 | 0.002061 | 0.012563 |
| 219440_at   | RAI2      | 0.014838 | 1.37E-07 | 3E-06    |
| 219445_at   | GLTSCR1   | 0.005481 | 0.005438 | 0.027582 |
| 219449_s_at | TMEM70    | -0.00476 | 0.010993 | 0.048253 |
| 219452_at   | DPEP2     | 0.009703 | 0.0002   | 0.001786 |
| 219462_at   | TMEM53    | -0.00783 | 1.31E-06 | 2.21E-05 |
| 219463_at   | C20orf103 | 0.00715  | 0.005549 | 0.028023 |
| 219471_at   | C13orf18  | 0.013477 | 1.31E-06 | 2.21E-05 |
| 219489_s_at | NXN       | 0.014592 | 2.14E-07 | 4.48E-06 |
| 219492_at   | CHIC2     | 0.00557  | 0.000262 | 0.002252 |
| 219496_at   | ANKRD57   | -0.01286 | 2.95E-05 | 0.000343 |
| 219497_s_at | BCL11A    | 0.008468 | 0.008773 | 0.040211 |
| 219498_s_at | BCL11A    | 0.014098 | 1.09E-06 | 1.9E-05  |
| 219505_at   | CECR1     | 0.020082 | 3.58E-07 | 7.03E-06 |
| 219506_at   | C1orf54   | 0.008842 | 0.001054 | 0.007243 |
| 219511_s_at | SNCAIP    | 0.014957 | 8.07E-06 | 0.00011  |
| 219519_s_at | SIGLEC1   | 0.008989 | 0.000169 | 0.001548 |
| 219524_s_at | C20orf7   | -0.00486 | 0.006315 | 0.031042 |
| 219525_at   | SLC47A1   | -0.02551 | 1.45E-13 | 2.32E-11 |
| 219527_at   | MOSC2     | -0.02377 | 3.17E-17 | 4.71E-14 |
| 219528_s_at | BCL11B    | 0.010017 | 0.000162 | 0.001499 |
| 219541_at   | LIME1     | -0.00773 | 0.000251 | 0.002172 |
| 219543_at   | PBLD      | -0.01175 | 2.99E-10 | 1.49E-08 |
| 219547_at   | COX15     | -0.00813 | 0.001242 | 0.008267 |
| 219550_at   | ROBO3     | 0.01012  | 6.6E-06  | 9.22E-05 |
| 219551_at   | EAF2      | -0.02013 | 9.56E-08 | 2.18E-06 |
| 219552_at   | SVEP1     | 0.011869 | 0.000466 | 0.003686 |
| 219554_at   | RHCG      | -0.02298 | 1.5E-08  | 4.27E-07 |
| 219555_s_at | CENPN     | -0.00826 | 0.002253 | 0.013505 |
| 219558_at   | ATP13A3   | -0.00632 | 0.001385 | 0.009051 |
| 219563_at   | C14orf139 | -0.00741 | 0.008861 | 0.040568 |
| 219574_at   | MARCH1    | 0.01297  | 2.21E-05 | 0.000265 |
| 219575_s_at | COG8      | -0.00722 | 3.04E-05 | 0.000352 |
| 219576_at   | MAP7D3    | 0.008148 | 0.000102 | 0.001011 |
| 219581_at   | TSEN2     | -0.00862 | 0.001206 | 0.008069 |
| 219582_at   | OGFRL1    | 0.01163  | 1.61E-05 | 0.000199 |
| 219586_at   | WDR59     | -0.00436 | 0.007043 | 0.033953 |
| 219593_at   | SLC15A3   | 0.005602 | 0.00329  | 0.018402 |
| 219594_at   | NINJ2     | 0.007325 | 0.001702 | 0.010731 |
| 219600_s_at | TMEM50B   | 0.004676 | 0.002002 | 0.012275 |
| 219607_s_at | MS4A4A    | 0.023738 | 4.94E-10 | 2.25E-08 |
| 219610_at   | RGNEF     | -0.0075  | 0.004476 | 0.023654 |
| 219615_s_at | KCNK5     | -0.01527 | 0.000111 | 0.001083 |

|             |              |          |          |          |
|-------------|--------------|----------|----------|----------|
| 219616_at   | ACSS3        | -0.0163  | 4.28E-08 | 1.07E-06 |
| 219620_x_at | C9orf167     | 0.005748 | 0.001061 | 0.007281 |
| 219625_s_at | COL4A3BP     | -0.00814 | 0.005271 | 0.026924 |
| 219627_at   | ZNF767       | 0.007029 | 0.001726 | 0.010853 |
| 219630_at   | PDZK1IP1     | -0.01813 | 0.000145 | 0.001359 |
| 219632_s_at | TRPV1        | -0.01492 | 5.48E-08 | 1.32E-06 |
| 219655_at   | C7orf10      | -0.01834 | 1.13E-08 | 3.3E-07  |
| 219664_s_at | DECR2        | -0.01292 | 1.88E-07 | 3.98E-06 |
| 219666_at   | MS4A6A       | 0.023098 | 5.13E-08 | 1.25E-06 |
| 219684_at   | RTP4         | 0.013987 | 2.37E-07 | 4.89E-06 |
| 219691_at   | SAMD9        | 0.005841 | 0.007549 | 0.035826 |
| 219700_at   | PLXDC1       | 0.016166 | 5.67E-07 | 1.06E-05 |
| 219705_at   | QSER1        | 0.006417 | 0.001407 | 0.009142 |
| 219713_at   | SHPK         | -0.00978 | 1.27E-06 | 2.15E-05 |
| 219718_at   | FGGY         | -0.01071 | 2.75E-06 | 4.25E-05 |
| 219722_s_at | GDPD3        | -0.01626 | 5.11E-08 | 1.25E-06 |
| 219723_x_at | AGPAT3       | -0.01626 | 1.95E-07 | 4.11E-06 |
| 219725_at   | TREM2        | 0.005288 | 0.001777 | 0.011116 |
| 219731_at   | CC2D2B       | -0.00785 | 0.000174 | 0.001591 |
| 219732_at   | LPPR1        | -0.03267 | 7.15E-15 | 2.21E-12 |
| 219739_at   | RNF186       | -0.03055 | 1.81E-15 | 7.09E-13 |
| 219744_at   | FN3K         | -0.02419 | 1.73E-07 | 3.69E-06 |
| 219747_at   | C4orf31      | -0.01542 | 0.001566 | 0.010001 |
| 219748_at   | TREML2       | 0.003973 | 0.011324 | 0.049309 |
| 219749_at   | SH2D4A       | 0.005271 | 0.00369  | 0.020212 |
| 219753_at   | STAG3        | 0.006051 | 0.002461 | 0.014518 |
| 219756_s_at | POF1B        | 0.006824 | 0.00261  | 0.015235 |
| 219759_at   | ERAP2        | 0.011439 | 0.006377 | 0.031293 |
| 219762_s_at | RPL36        | 0.01026  | 0.002189 | 0.013161 |
| 219768_at   | VTCN1        | 0.011359 | 0.000942 | 0.006628 |
| 219771_at   | TBC1D8B      | -0.00861 | 0.003131 | 0.017669 |
| 219773_at   | NOX4         | -0.02493 | 7.6E-11  | 4.77E-09 |
| 219779_at   | ZFHX4        | 0.015125 | 0.011219 | 0.048996 |
| 219785_s_at | LOC100288525 | -0.01371 | 7.72E-06 | 0.000105 |
| 219788_at   | PILRA        | 0.009807 | 5.13E-07 | 9.72E-06 |
| 219789_at   | NPR3         | -0.02723 | 2.06E-12 | 2.31E-10 |
| 219790_s_at | NPR3         | -0.01895 | 1.01E-07 | 2.29E-06 |
| 219796_s_at | CDHR5        | -0.01953 | 1.68E-09 | 6.38E-08 |
| 219797_at   | MGAT4A       | -0.00523 | 0.002687 | 0.015598 |
| 219799_s_at | DHRS9        | 0.007032 | 0.000323 | 0.002682 |
| 219803_at   | ANGPTL3      | -0.03652 | 5.76E-14 | 1.04E-11 |
| 219809_at   | WDR55        | -0.0083  | 5.83E-05 | 0.000624 |
| 219812_at   | PVRIG        | 0.006556 | 0.002932 | 0.016739 |
| 219822_at   | MTRF1        | -0.00623 | 0.000334 | 0.002758 |
| 219836_at   | ZBED2        | 0.005664 | 0.002802 | 0.016128 |
| 219839_x_at | TCL6         | -0.00665 | 0.000496 | 0.003894 |
| 219840_s_at | TCL6         | -0.01735 | 3.33E-09 | 1.14E-07 |
| 219842_at   | ARL15        | -0.00839 | 8.24E-05 | 0.000836 |
| 219844_at   | C10orf118    | -0.00463 | 0.008087 | 0.037761 |

|             |           |          |          |          |
|-------------|-----------|----------|----------|----------|
| 219850_s_at | EHF       | 0.014528 | 5.1E-05  | 0.000554 |
| 219864_s_at | RCAN3     | 0.019185 | 1.3E-06  | 2.19E-05 |
| 219867_at   | CHODL     | 0.015552 | 2.46E-07 | 5.05E-06 |
| 219872_at   | FAM198B   | 0.013278 | 1.52E-05 | 0.000189 |
| 219873_at   | COLEC11   | -0.01736 | 2.74E-09 | 9.86E-08 |
| 219885_at   | SLFN12    | 0.006232 | 0.008689 | 0.039881 |
| 219890_at   | CLEC5A    | 0.007889 | 0.000927 | 0.006547 |
| 219891_at   | PGPEP1    | -0.01562 | 8.81E-08 | 2.03E-06 |
| 219902_at   | BHMT2     | -0.02473 | 9.6E-15  | 2.68E-12 |
| 219914_at   | ECEL1     | 0.005627 | 0.003746 | 0.020477 |
| 219915_s_at | SLC16A10  | -0.0265  | 2.63E-14 | 5.58E-12 |
| 219919_s_at | SSH3      | 0.004327 | 0.01001  | 0.04475  |
| 219937_at   | TRHDE     | -0.00881 | 0.000708 | 0.005239 |
| 219945_at   | DDX25     | -0.01156 | 2.72E-05 | 0.000318 |
| 219947_at   | CLEC4A    | 0.00976  | 3E-05    | 0.000349 |
| 219948_x_at | UGT2A3    | -0.00719 | 0.006747 | 0.032684 |
| 219954_s_at | GBA3      | -0.01912 | 1.72E-08 | 4.77E-07 |
| 219956_at   | GALNT6    | 0.009619 | 0.001971 | 0.012123 |
| 219959_at   | MOCOS     | 0.007489 | 0.000757 | 0.005528 |
| 219960_s_at | UCHL5     | -0.00633 | 0.009489 | 0.042827 |
| 219962_at   | ACE2      | -0.02064 | 5.43E-09 | 1.76E-07 |
| 219970_at   | GIPC2     | -0.01911 | 5.59E-07 | 1.05E-05 |
| 219973_at   | ARSJ      | 0.005778 | 0.001506 | 0.009677 |
| 219974_x_at | ECHDC1    | -0.00666 | 1.8E-06  | 2.92E-05 |
| 219986_s_at | ACAD10    | -0.01313 | 3.57E-08 | 9.08E-07 |
| 219991_at   | SLC2A9    | -0.01666 | 6.76E-06 | 9.4E-05  |
| 219998_at   | HSPC159   | -0.00852 | 0.000209 | 0.001856 |
| 220002_at   | KIF26B    | 0.011025 | 4.29E-08 | 1.07E-06 |
| 220005_at   | P2RY13    | 0.013734 | 2.26E-06 | 3.58E-05 |
| 220008_at   | SGK269    | 0.00458  | 0.008683 | 0.039876 |
| 220009_at   | LONRF3    | -0.00861 | 0.002295 | 0.013702 |
| 220016_at   | AHNAK     | 0.005991 | 0.008758 | 0.04016  |
| 220020_at   | XPNPEP3   | -0.00846 | 0.000996 | 0.00692  |
| 220032_at   | C7orf58   | 0.008043 | 0.004127 | 0.022137 |
| 220034_at   | IRAK3     | 0.004864 | 0.002914 | 0.016647 |
| 220038_at   | C8orf44   | -0.01337 | 1.4E-05  | 0.000176 |
| 220047_at   | SIRT4     | -0.00862 | 0.002855 | 0.016369 |
| 220055_at   | ZNF287    | 0.005005 | 0.008243 | 0.038341 |
| 220061_at   | ACSM5     | -0.02707 | 2.61E-11 | 1.96E-09 |
| 220072_at   | CSPP1     | -0.00539 | 0.001468 | 0.009474 |
| 220074_at   | CDHR5     | -0.01094 | 3.8E-06  | 5.65E-05 |
| 220075_s_at | CDHR5     | -0.04337 | 1.76E-15 | 6.99E-13 |
| 220083_x_at | UCHL5     | -0.00364 | 0.009927 | 0.044461 |
| 220084_at   | C14orf105 | -0.00869 | 9.52E-05 | 0.000951 |
| 220087_at   | BCMO1     | -0.00832 | 0.002715 | 0.015713 |
| 220089_at   | L2HGDH    | -0.0112  | 2.54E-06 | 3.96E-05 |
| 220092_s_at | ANTXR1    | 0.017038 | 1.17E-05 | 0.000151 |
| 220094_s_at | CCDC90A   | -0.01438 | 5.3E-19  | 1.48E-15 |
| 220095_at   | CNTLN     | 0.006634 | 0.004217 | 0.022566 |

|             |          |          |          |          |
|-------------|----------|----------|----------|----------|
| 220099_s_at | LUC7L2   | -0.00447 | 0.008971 | 0.040961 |
| 220100_at   | SLC22A11 | -0.02589 | 1.65E-09 | 6.27E-08 |
| 220105_at   | RTDR1    | -0.007   | 0.002472 | 0.014558 |
| 220107_s_at | FAM164C  | -0.00791 | 0.000894 | 0.006365 |
| 220116_at   | KCNN2    | -0.01087 | 0.00128  | 0.008456 |
| 220128_s_at | NIPAL2   | 0.00784  | 0.000716 | 0.005288 |
| 220132_s_at | CLEC2D   | 0.015171 | 2.11E-06 | 3.37E-05 |
| 220135_s_at | SLC7A9   | -0.03509 | 2.83E-13 | 4.2E-11  |
| 220139_at   | DNMT3L   | -0.01286 | 1.86E-05 | 0.000228 |
| 220146_at   | TLR7     | 0.009632 | 0.001019 | 0.00705  |
| 220147_s_at | FAM60A   | 0.006471 | 0.000557 | 0.004281 |
| 220148_at   | ALDH8A1  | -0.02245 | 4.28E-13 | 5.96E-11 |
| 220149_at   | C2orf54  | -0.02123 | 1.05E-05 | 0.000138 |
| 220150_s_at | FAM184A  | -0.00545 | 0.002672 | 0.015528 |
| 220156_at   | EFCAB1   | 0.006577 | 0.001042 | 0.007177 |
| 220170_at   | FHL5     | 0.008567 | 0.010754 | 0.047446 |
| 220175_s_at | CBWD1    | -0.00619 | 0.008092 | 0.037776 |
| 220177_s_at | TMPRSS3  | 0.008823 | 0.003014 | 0.017132 |
| 220178_at   | C19orf28 | -0.01413 | 8.9E-08  | 2.05E-06 |
| 220179_at   | DPEP3    | 0.006391 | 0.007909 | 0.037068 |
| 220183_s_at | NUDT6    | -0.00503 | 0.002292 | 0.013695 |
| 220186_s_at | CDHR2    | -0.02215 | 6.9E-13  | 9.25E-11 |
| 220187_at   | STEAP4   | 0.013171 | 0.000388 | 0.003139 |
| 220197_at   | ATP6V0A4 | -0.00977 | 0.000948 | 0.006653 |
| 220198_s_at | EIF5A2   | -0.01    | 0.000342 | 0.002817 |
| 220220_at   | LRRC37A4 | 0.007898 | 0.00794  | 0.037193 |
| 220224_at   | HAO1     | -0.00724 | 0.004291 | 0.022874 |
| 220230_s_at | CYB5R2   | 0.004745 | 0.007783 | 0.036686 |
| 220233_at   | FBXO17   | -0.01311 | 0.00048  | 0.003777 |
| 220234_at   | CA8      | -0.00647 | 0.004928 | 0.02557  |
| 220236_at   | PDPR     | -0.0088  | 0.008672 | 0.039839 |
| 220240_s_at | TMCO3    | 0.007586 | 0.002667 | 0.015509 |
| 220251_at   | C1orf107 | -0.00682 | 0.009446 | 0.042673 |
| 220252_x_at | CXorf21  | 0.008535 | 0.000135 | 0.001279 |
| 220253_s_at | LRP12    | -0.00459 | 0.007433 | 0.035419 |
| 220260_at   | TBC1D19  | -0.00627 | 0.00052  | 0.004056 |
| 220263_at   | SMAD5OS  | -0.00678 | 0.001417 | 0.009193 |
| 220264_s_at | GPR107   | -0.00651 | 0.010978 | 0.048201 |
| 220285_at   | FAM108B1 | -0.00708 | 0.001784 | 0.01115  |
| 220297_at   | BTBD7    | -0.01019 | 1.49E-05 | 0.000187 |
| 220298_s_at | SPATA6   | 0.008519 | 0.000541 | 0.004184 |
| 220303_at   | PDZD3    | -0.01593 | 4.84E-09 | 1.59E-07 |
| 220307_at   | CD244    | 0.006534 | 0.005016 | 0.025927 |
| 220310_at   | TUBAL3   | -0.02754 | 5.03E-12 | 4.9E-10  |
| 220329_s_at | RMND1    | -0.01088 | 1.2E-06  | 2.04E-05 |
| 220330_s_at | SAMSN1   | 0.017113 | 3.52E-05 | 0.000401 |
| 220333_at   | PAQR5    | -0.01456 | 9.77E-06 | 0.000129 |
| 220357_s_at | SGK2     | -0.01269 | 1.27E-10 | 7.42E-09 |
| 220358_at   | BATF3    | 0.007642 | 9.04E-05 | 0.00091  |



|             |           |          |          |          |
|-------------|-----------|----------|----------|----------|
| 220360_at   | THAP9     | -0.00622 | 0.003685 | 0.020199 |
| 220365_at   | ALLC      | -0.00927 | 0.000601 | 0.004564 |
| 220372_at   | DNAJC28   | -0.00981 | 0.000177 | 0.001611 |
| 220376_at   | LRRC19    | -0.01771 | 5.36E-08 | 1.3E-06  |
| 220377_at   | FAM30A    | 0.006654 | 0.007856 | 0.036897 |
| 220382_s_at | ARHGAP28  | -0.01519 | 4E-05    | 0.00045  |
| 220387_s_at | HHLA3     | -0.00779 | 0.001766 | 0.011057 |
| 220393_at   | LGSN      | -0.00952 | 0.001619 | 0.010275 |
| 220407_s_at | TGFB2     | 0.011848 | 0.000118 | 0.001134 |
| 220418_at   | UBASH3A   | 0.004945 | 0.004552 | 0.024002 |
| 220424_at   | NPHS2     | -0.01996 | 0.000185 | 0.001674 |
| 220426_at   | C20orf195 | 0.004747 | 0.008458 | 0.039085 |
| 220437_at   | LOC55908  | 0.005554 | 0.006437 | 0.031501 |
| 220441_at   | DNAJC22   | -0.01019 | 0.001652 | 0.010454 |
| 220465_at   | LOC80054  | -0.00557 | 0.000636 | 0.004794 |
| 220502_s_at | SLC13A1   | -0.01788 | 4.13E-05 | 0.000462 |
| 220503_at   | SLC13A1   | -0.0181  | 9.39E-05 | 0.000939 |
| 220507_s_at | UPB1      | -0.03778 | 1.74E-18 | 3.22E-15 |
| 220511_s_at | DLC1      | 0.004862 | 0.003219 | 0.01809  |
| 220516_at   | ZSCAN2    | -0.00665 | 9.6E-05  | 0.000957 |
| 220547_s_at | FAM35A    | -0.00693 | 0.000141 | 0.001331 |
| 220554_at   | SLC22A7   | -0.01385 | 5.2E-08  | 1.26E-06 |
| 220560_at   | C11orf21  | 0.007654 | 0.000668 | 0.004998 |
| 220567_at   | IKZF2     | 0.010752 | 1.62E-06 | 2.64E-05 |
| 220577_at   | GVINP1    | 0.012265 | 0.000191 | 0.001717 |
| 220591_s_at | EFHC2     | 0.012609 | 3.49E-07 | 6.87E-06 |
| 220600_at   | C3orf75   | 0.005952 | 0.006414 | 0.03144  |
| 220604_x_at | FTCD      | -0.02861 | 5.29E-12 | 5.11E-10 |
| 220606_s_at | C17orf48  | 0.005588 | 0.00829  | 0.038507 |
| 220607_x_at | TH1L      | -0.00813 | 0.001609 | 0.010227 |
| 220613_s_at | SYTL2     | 0.006648 | 0.01097  | 0.048193 |
| 220617_s_at | ZNF532    | 0.010245 | 1.13E-05 | 0.000146 |
| 220625_s_at | ELF5      | -0.01099 | 0.005481 | 0.027759 |
| 220642_x_at | GPR89A    | -0.01698 | 2.63E-10 | 1.34E-08 |
| 220661_s_at | ZNF692    | 0.004619 | 0.009976 | 0.044616 |
| 220671_at   | CCRN4L    | -0.02115 | 1.42E-11 | 1.2E-09  |
| 220675_s_at | PNPLA3    | -0.01123 | 5.63E-05 | 0.000605 |
| 220677_s_at | ADAMTS8   | 0.005378 | 0.00053  | 0.00412  |
| 220692_at   |           | -0.00784 | 0.000138 | 0.001299 |
| 220723_s_at | CWH43     | -0.02085 | 3.48E-08 | 8.86E-07 |
| 220724_at   | CWH43     | -0.01346 | 0.000399 | 0.003222 |
| 220727_at   | KCNK10    | -0.02067 | 2.11E-12 | 2.35E-10 |
| 220731_s_at | NECAP2    | 0.00614  | 2.55E-06 | 3.97E-05 |
| 220736_at   | SLC19A3   | -0.01104 | 0.000521 | 0.004058 |
| 220738_s_at | RPS6KA6   | -0.00875 | 0.000635 | 0.004786 |
| 220740_s_at | SLC12A6   | -0.0177  | 4.34E-12 | 4.27E-10 |
| 220741_s_at | PPA2      | -0.00807 | 9.08E-06 | 0.000121 |
| 220753_s_at | CRYL1     | -0.02116 | 6.94E-11 | 4.46E-09 |
| 220769_s_at | WDR78     | -0.00886 | 0.003737 | 0.02044  |

|             |          |          |          |          |
|-------------|----------|----------|----------|----------|
| 220773_s_at | GPHN     | -0.01894 | 8.73E-08 | 2.01E-06 |
| 220801_s_at | HAO2     | -0.03649 | 9.09E-15 | 2.63E-12 |
| 220809_at   |          | -0.00525 | 0.004984 | 0.02581  |
| 220812_s_at | HHLA2    | -0.01448 | 4.15E-05 | 0.000463 |
| 220819_at   | FRMD1    | -0.01112 | 1.3E-06  | 2.19E-05 |
| 220839_at   | METTL5   | 0.004096 | 0.011216 | 0.048991 |
| 220865_s_at | PDSS1    | -0.01235 | 1.49E-05 | 0.000187 |
| 220885_s_at | CENPJ    | 0.006114 | 0.009255 | 0.042007 |
| 220892_s_at | PSAT1    | -0.02909 | 1.13E-08 | 3.31E-07 |
| 220922_s_at | SPANXA1  | 0.005347 | 0.011494 | 0.04994  |
| 220930_s_at | MGC5590  | -0.01008 | 0.000128 | 0.001222 |
| 220931_at   | MGC5590  | -0.00776 | 0.005075 | 0.026192 |
| 220934_s_at | TMEM223  | -0.00821 | 0.000291 | 0.002458 |
| 220939_s_at | DPP8     | -0.00638 | 0.000984 | 0.006858 |
| 220940_at   | ANKRD36B | 0.014515 | 8.32E-05 | 0.000844 |
| 220942_x_at | FAM162A  | -0.00577 | 7.18E-05 | 0.000744 |
| 220943_s_at | C2orf56  | -0.0052  | 0.001799 | 0.011222 |
| 220951_s_at | A1CF     | -0.02742 | 4.47E-09 | 1.47E-07 |
| 220952_s_at | PLEKHA5  | -0.00821 | 0.00073  | 0.005372 |
| 220968_s_at | TSPAN9   | -0.00525 | 0.00109  | 0.007444 |
| 220988_s_at | C1QTNF3  | 0.014441 | 6.49E-06 | 9.09E-05 |
| 220989_s_at | AMN      | -0.00507 | 0.009169 | 0.04173  |
| 220999_s_at | CYFIP2   | -0.01224 | 7.37E-08 | 1.72E-06 |
| 221004_s_at | ITM2C    | 0.025113 | 9.26E-13 | 1.18E-10 |
| 221005_s_at | PTDSS2   | -0.00436 | 0.006987 | 0.033712 |
| 221006_s_at | SNX27    | -0.01441 | 1.59E-08 | 4.47E-07 |
| 221008_s_at | AGXT2L1  | -0.02658 | 5.27E-08 | 1.28E-06 |
| 221015_s_at | CDADC1   | -0.01231 | 3.3E-06  | 4.98E-05 |
| 221019_s_at | COLEC12  | 0.00948  | 0.003619 | 0.019913 |
| 221020_s_at | SLC25A32 | -0.00664 | 0.004654 | 0.024446 |
| 221023_s_at | KCNH6    | -0.00578 | 0.009789 | 0.043949 |
| 221024_s_at | SLC2A10  | 0.008081 | 0.001465 | 0.009461 |
| 221030_s_at | ARHGAP24 | -0.00489 | 0.001396 | 0.009089 |
| 221041_s_at | SLC17A5  | -0.01472 | 1.02E-09 | 4.14E-08 |
| 221042_s_at | CLMN     | -0.00654 | 0.000909 | 0.006449 |
| 221058_s_at | CKLF     | 0.016419 | 3.65E-11 | 2.59E-09 |
| 221059_s_at | COTL1    | -0.01396 | 3.61E-06 | 5.4E-05  |
| 221060_s_at | TLR4     | 0.00679  | 0.010782 | 0.047553 |
| 221063_x_at | RNF123   | -0.00887 | 0.005091 | 0.026264 |
| 221064_s_at | UNKL     | 0.004938 | 0.002011 | 0.012307 |
| 221069_s_at | TACO1    | -0.01693 | 0.000346 | 0.002844 |
| 221078_s_at | CCDC88A  | 0.006669 | 0.007865 | 0.036911 |
| 221087_s_at | APOL3    | 0.012935 | 0.000143 | 0.001341 |
| 221092_at   | IKZF3    | 0.015482 | 9E-07    | 1.6E-05  |
| 221103_s_at | WDR52    | 0.004846 | 0.011252 | 0.049086 |
| 221122_at   | HRASLS2  | -0.0084  | 0.008259 | 0.038395 |
| 221127_s_at | DKK3     | 0.01638  | 3.6E-06  | 5.4E-05  |
| 221129_at   | C17orf88 | 0.004421 | 0.007055 | 0.033981 |
| 221142_s_at | PECR     | -0.01031 | 0.000407 | 0.003277 |

|             |           |          |          |          |
|-------------|-----------|----------|----------|----------|
| 221163_s_at | MLXIPL    | -0.0102  | 1.2E-07  | 2.67E-06 |
| 221177_at   | MIA2      | -0.01157 | 0.000781 | 0.005666 |
| 221188_s_at | CIDEB     | -0.01335 | 9.7E-09  | 2.9E-07  |
| 221190_s_at | C18orf8   | -0.00661 | 7.79E-05 | 0.000798 |
| 221203_s_at | YEATS2    | 0.007813 | 0.000151 | 0.001407 |
| 221210_s_at | NPL       | -0.02854 | 2.3E-12  | 2.53E-10 |
| 221219_s_at | KLHDC4    | -0.00736 | 0.000481 | 0.003785 |
| 221220_s_at | SCYL2     | -0.00669 | 0.004364 | 0.023175 |
| 221221_s_at | KLHL3     | -0.01223 | 0.000508 | 0.003973 |
| 221223_x_at | CISH      | -0.00884 | 0.000183 | 0.001659 |
| 221227_x_at | COQ3      | -0.00586 | 0.001138 | 0.007702 |
| 221229_s_at | TRMT61B   | -0.00962 | 0.000233 | 0.002033 |
| 221230_s_at | ARID4B    | 0.007902 | 0.000237 | 0.002065 |
| 221244_s_at | PDPK1     | -0.01075 | 0.00033  | 0.002735 |
| 221245_s_at | FZD5      | -0.01864 | 3.38E-10 | 1.65E-08 |
| 221246_x_at | TNS1      | -0.00855 | 9.31E-06 | 0.000124 |
| 221247_s_at | WBSCR16   | -0.00456 | 0.009756 | 0.043829 |
| 221253_s_at | MUTED     | 0.00709  | 0.002688 | 0.015599 |
| 221256_s_at | HDHD3     | -0.01947 | 3.83E-08 | 9.66E-07 |
| 221261_x_at | MAGED4    | 0.00781  | 0.000989 | 0.006885 |
| 221268_s_at | SGPP1     | -0.00818 | 0.000187 | 0.001689 |
| 221269_s_at | SH3BGRL3  | 0.004343 | 0.004397 | 0.02332  |
| 221274_s_at | LMAN2L    | -0.00917 | 0.000114 | 0.001103 |
| 221282_x_at | RUNX2     | 0.005906 | 0.000998 | 0.006931 |
| 221283_at   | RUNX2     | 0.005317 | 0.007655 | 0.036222 |
| 221286_s_at | MGC29506  | 0.005058 | 0.010836 | 0.047726 |
| 221291_at   | ULBP2     | 0.004755 | 0.01025  | 0.045631 |
| 221293_s_at | DEF6      | 0.008478 | 5.19E-05 | 0.000562 |
| 221298_s_at | SLC22A8   | -0.03534 | 3.01E-10 | 1.5E-08  |
| 221305_s_at | UGT1A8    | -0.03579 | 4.23E-11 | 2.92E-09 |
| 221306_at   | GPR27     | 0.006032 | 0.000606 | 0.004592 |
| 221311_x_at | LYRM2     | -0.00654 | 0.003078 | 0.017446 |
| 221369_at   | MTNR1A    | -0.00872 | 0.000157 | 0.00146  |
| 221371_at   | TNFSF18   | 0.005579 | 0.009196 | 0.041801 |
| 221379_at   |           | 0.005032 | 0.002065 | 0.012586 |
| 221399_at   | EDA2R     | 0.004214 | 0.011369 | 0.049476 |
| 221425_s_at | ISCA1     | -0.00606 | 0.000741 | 0.005438 |
| 221434_s_at | C14orf156 | -0.00587 | 0.000165 | 0.001524 |
| 221437_s_at | MRPS15    | -0.00911 | 9.24E-06 | 0.000123 |
| 221459_at   | TAAR5     | 0.005505 | 0.004469 | 0.02363  |
| 221463_at   | CCL24     | 0.004864 | 0.009489 | 0.042827 |
| 221474_at   | MYL12B    | 0.006021 | 5.28E-05 | 0.00057  |
| 221479_s_at | BNIP3L    | -0.00436 | 0.006571 | 0.032023 |
| 221481_x_at | HNRNPD    | 0.003425 | 0.000413 | 0.003321 |
| 221493_at   | TSPYL1    | -0.00655 | 7.35E-05 | 0.000759 |
| 221497_x_at | EGLN1     | -0.00379 | 0.002775 | 0.016004 |
| 221498_at   | SNX27     | -0.0093  | 4.49E-06 | 6.56E-05 |
| 221504_s_at | ATP6V1H   | -0.00792 | 0.005615 | 0.028273 |
| 221512_at   | TMEM222   | -0.00348 | 0.011302 | 0.049254 |

|             |              |          |          |          |
|-------------|--------------|----------|----------|----------|
| 221516_s_at | SMCR7L       | -0.01239 | 7.28E-07 | 1.32E-05 |
| 221523_s_at | RRAGD        | -0.01314 | 5.52E-06 | 7.88E-05 |
| 221524_s_at | RRAGD        | -0.01195 | 8.58E-09 | 2.62E-07 |
| 221530_s_at | BHLHE41      | 0.006126 | 0.010569 | 0.04681  |
| 221533_at   | FAM162A      | -0.00587 | 0.000423 | 0.003382 |
| 221541_at   | CRISPLD2     | 0.011689 | 0.001638 | 0.010375 |
| 221542_s_at | ERLIN2       | -0.00653 | 0.0061   | 0.030186 |
| 221550_at   | COX15        | -0.00728 | 0.000116 | 0.001123 |
| 221552_at   | ABHD6        | -0.02043 | 1.16E-14 | 3.13E-12 |
| 221555_x_at | CDC14B       | -0.01008 | 8.6E-05  | 0.00087  |
| 221556_at   | CDC14B       | -0.00942 | 0.000612 | 0.004631 |
| 221558_s_at | LEF1         | 0.008862 | 0.007708 | 0.036422 |
| 221562_s_at | SIRT3        | -0.00642 | 0.00786  | 0.036907 |
| 221565_s_at | CALHM2       | 0.007576 | 1.33E-05 | 0.000168 |
| 221568_s_at | LIN7C        | -0.00593 | 0.005814 | 0.029042 |
| 221572_s_at | SLC26A6      | -0.01441 | 1.08E-07 | 2.43E-06 |
| 221575_at   | SCLY         | -0.01366 | 2.84E-08 | 7.41E-07 |
| 221579_s_at | NUDT3        | 0.00689  | 0.00653  | 0.031858 |
| 221581_s_at | LAT2         | 0.00829  | 2.7E-06  | 4.18E-05 |
| 221588_x_at | ALDH6A1      | -0.02808 | 3.1E-22  | 6.92E-18 |
| 221589_s_at | LOC100506517 | -0.02899 | 1.8E-20  | 1.33E-16 |
| 221590_s_at | ALDH6A1      | -0.02806 | 1.75E-13 | 2.71E-11 |
| 221599_at   | C11orf67     | -0.00441 | 0.001086 | 0.007427 |
| 221600_s_at | C11orf67     | -0.00691 | 0.004042 | 0.021769 |
| 221601_s_at | FAIM3        | 0.01815  | 1.36E-08 | 3.93E-07 |
| 221602_s_at | FAIM3        | 0.010981 | 2.36E-05 | 0.000281 |
| 221605_s_at | PIPOX        | -0.03215 | 1.4E-15  | 5.99E-13 |
| 221606_s_at | HMGN5        | -0.00602 | 0.004243 | 0.022669 |
| 221607_x_at | ACTG1        | 0.003115 | 0.00099  | 0.00689  |
| 221620_s_at | APOO         | -0.00756 | 0.00059  | 0.004502 |
| 221624_at   | TCL6         | -0.00828 | 0.000138 | 0.001299 |
| 221627_at   | TRIM10       | -0.01967 | 1.92E-11 | 1.51E-09 |
| 221636_s_at | MOSC2        | -0.02036 | 4.77E-15 | 1.58E-12 |
| 221648_s_at | LOC100507192 | -0.02125 | 1.64E-11 | 1.34E-09 |
| 221651_x_at | IGK@         | 0.039739 | 8.93E-08 | 2.05E-06 |
| 221655_x_at | EPS8L1       | 0.009015 | 0.000197 | 0.001767 |
| 221656_s_at | ARHGEF10L    | -0.0097  | 4.61E-08 | 1.14E-06 |
| 221662_s_at | SLC22A7      | -0.00957 | 2.04E-05 | 0.000248 |
| 221665_s_at | EPS8L1       | 0.009766 | 3.38E-05 | 0.000388 |
| 221666_s_at | PYCARD       | 0.016326 | 1.66E-08 | 4.63E-07 |
| 221668_s_at | DNAI2        | 0.004684 | 0.001437 | 0.009313 |
| 221669_s_at | ACAD8        | -0.01577 | 2.19E-07 | 4.58E-06 |
| 221671_x_at | IGK@         | 0.038935 | 1.23E-07 | 2.74E-06 |
| 221675_s_at | CHPT1        | -0.0132  | 7.61E-09 | 2.36E-07 |
| 221679_s_at | ABHD6        | -0.02721 | 2.64E-10 | 1.35E-08 |
| 221690_s_at | NLRP2        | 0.009075 | 0.000235 | 0.00205  |
| 221692_s_at | MRPL34       | -0.00889 | 3.31E-06 | 4.99E-05 |
| 221697_at   | MAP1LC3C     | 0.006707 | 0.005006 | 0.025891 |
| 221698_s_at | CLEC7A       | 0.015644 | 2.81E-06 | 4.32E-05 |

|             |              |          |          |          |
|-------------|--------------|----------|----------|----------|
| 221700_s_at | UBA52        | 0.007674 | 0.008002 | 0.037433 |
| 221701_s_at | STRA6        | -0.01108 | 3.55E-06 | 5.32E-05 |
| 221705_s_at | SIKE1        | -0.00647 | 0.009688 | 0.043599 |
| 221710_x_at | FAM176B      | 0.004474 | 0.010198 | 0.045471 |
| 221724_s_at | CLEC4A       | 0.006015 | 0.002087 | 0.012677 |
| 221730_at   | COL5A2       | 0.008893 | 0.001484 | 0.009561 |
| 221731_x_at | VCAN         | 0.032051 | 2.74E-09 | 9.88E-08 |
| 221737_at   | GNA12        | -0.00541 | 0.001971 | 0.012123 |
| 221748_s_at | TNS1         | -0.01002 | 4.91E-06 | 7.06E-05 |
| 221750_at   | HMGCS1       | -0.00655 | 0.000671 | 0.005015 |
| 221766_s_at | FAM46A       | 0.008508 | 0.001317 | 0.00867  |
| 221773_at   | ELK3         | 0.015069 | 2.82E-05 | 0.00033  |
| 221777_at   | C12orf52     | -0.00604 | 0.002433 | 0.014386 |
| 221781_s_at | DNAJC10      | 0.008651 | 0.003346 | 0.018689 |
| 221782_at   | DNAJC10      | 0.006362 | 0.004944 | 0.025642 |
| 221798_x_at |              | 0.005652 | 0.001439 | 0.009319 |
| 221804_s_at | FAM45A       | -0.00361 | 0.006534 | 0.031873 |
| 221805_at   | NEFL         | 0.01708  | 0.003775 | 0.02061  |
| 221810_at   | RAB15        | -0.00557 | 0.006887 | 0.033285 |
| 221814_at   | GPR124       | 0.012904 | 3.99E-05 | 0.000449 |
| 221818_at   | INTS5        | -0.00547 | 0.000673 | 0.00503  |
| 221824_s_at | MARCH8       | -0.00418 | 0.003828 | 0.020835 |
| 221836_s_at | TRAPPC9      | -0.00439 | 0.004882 | 0.025385 |
| 221840_at   | PTPRE        | 0.00999  | 0.00088  | 0.006284 |
| 221847_at   | LOC100129361 | -0.00594 | 8.34E-05 | 0.000845 |
| 221848_at   | ZGPAT        | -0.01471 | 4.6E-05  | 0.000506 |
| 221859_at   | SYT13        | -0.00935 | 0.004281 | 0.022828 |
| 221864_at   | ORAI3        | -0.00708 | 0.009294 | 0.042151 |
| 221868_at   | PAIP2B       | -0.01325 | 8.1E-08  | 1.88E-06 |
| 221870_at   | EHD2         | 0.019532 | 2.25E-10 | 1.18E-08 |
| 221872_at   | RARRES1      | 0.012132 | 0.000956 | 0.006703 |
| 221875_x_at | HLA-F        | 0.015778 | 4.86E-09 | 1.59E-07 |
| 221876_at   | ZNF783       | 0.0062   | 0.004454 | 0.023572 |
| 221877_at   | IRGQ         | -0.00704 | 0.000307 | 0.002565 |
| 221879_at   | CALML4       | -0.0134  | 1.09E-06 | 1.9E-05  |
| 221881_s_at | CLIC4        | -0.00888 | 0.000362 | 0.002956 |
| 221891_x_at | HSPA8        | -0.00515 | 1.43E-09 | 5.54E-08 |
| 221894_at   | ADCK2        | 0.003904 | 0.008185 | 0.038123 |
| 221910_at   | ETV1         | 0.005962 | 0.001955 | 0.012039 |
| 221911_at   | ETV1         | 0.01454  | 6.06E-05 | 0.000644 |
| 221925_s_at | CSPP1        | -0.006   | 0.008987 | 0.041006 |
| 221927_s_at | ABHD11       | 0.005032 | 0.005315 | 0.027117 |
| 221928_at   | ACACB        | -0.00902 | 5.47E-05 | 0.000588 |
| 221932_s_at | GLRX5        | -0.00801 | 9.62E-08 | 2.19E-06 |
| 221942_s_at | GUCY1A3      | 0.012074 | 2.46E-06 | 3.84E-05 |
| 221943_x_at | RPL38        | 0.004629 | 0.00013  | 0.001239 |
| 221953_s_at | MMP24        | -0.00822 | 7.36E-06 | 0.000101 |
| 221957_at   | PDK3         | -0.00939 | 0.001641 | 0.010389 |
| 221958_s_at | WLS          | -0.01063 | 6.12E-07 | 1.13E-05 |

|             |              |           |          |          |
|-------------|--------------|-----------|----------|----------|
| 221959_at   | FAM110B      | 0.013218  | 4.91E-06 | 7.07E-05 |
| 221968_s_at | ZNF771       | -0.00574  | 0.000705 | 0.005222 |
| 221973_at   | LOC100506076 | 0.009648  | 0.005714 | 0.028645 |
| 221976_s_at | HDGFRP3      | 0.006151  | 0.008609 | 0.039614 |
| 221977_at   | TBX2         | -0.01288  | 3.33E-06 | 5.03E-05 |
| 221978_at   | HLA-F        | 0.008133  | 0.00183  | 0.011371 |
| 221981_s_at | WDR59        | -0.01467  | 8.73E-08 | 2.01E-06 |
| 221983_at   | FAM134A      | -0.00615  | 0.005344 | 0.027217 |
| 221995_s_at |              | -0.00466  | 0.00749  | 0.03563  |
| 221998_s_at | VRK3         | -0.01166  | 0.000231 | 0.002021 |
| 222001_x_at | LOC728855    | 0.012534  | 8.13E-13 | 1.07E-10 |
| 222006_at   | LETM1        | -0.00904  | 0.005942 | 0.029578 |
| 222010_at   | TCP1         | -0.00804  | 0.000131 | 0.001248 |
| 222011_s_at | TCP1         | -0.00499  | 0.005223 | 0.02673  |
| 222014_x_at | MTO1         | -0.00788  | 0.000893 | 0.006361 |
| 222020_s_at | NTM          | 0.0191    | 2.33E-09 | 8.55E-08 |
| 222021_x_at | SDHAP1       | -0.00703  | 7.02E-05 | 0.000729 |
| 222033_s_at | FLT1         | -0.01377  | 2E-05    | 0.000243 |
| 222043_at   | CLU          | 0.006549  | 0.002663 | 0.015495 |
| 222049_s_at | RBP4         | -0.02838  | 9.64E-07 | 1.71E-05 |
| 222052_at   | C19orf54     | -0.01142  | 2.24E-07 | 4.66E-06 |
| 222071_s_at | SLCO4C1      | -0.01202  | 2.91E-05 | 0.000339 |
| 222078_at   | PKLR         | -0.02644  | 6.84E-14 | 1.2E-11  |
| 222083_at   | GLYAT        | -0.02139  | 9.31E-09 | 2.81E-07 |
| 222088_s_at | SLC2A14      | 0.015427  | 0.000127 | 0.001216 |
| 222102_at   | GSTA3        | -0.00884  | 5.56E-06 | 7.93E-05 |
| 222118_at   | CENPN        | -0.00838  | 0.000318 | 0.002646 |
| 222134_at   | DDO          | -0.01481  | 6.21E-07 | 1.15E-05 |
| 222138_s_at | WDR13        | -0.00994  | 3.05E-07 | 6.13E-06 |
| 222140_s_at | GPR89A       | -0.0148   | 2.44E-08 | 6.48E-07 |
| 222146_s_at | TCF4         | 0.012323  | 0.000194 | 0.001737 |
| 222182_s_at | CNOT2        | 0.003533  | 0.010381 | 0.046114 |
| 222190_s_at | C16orf58     | -0.01005  | 1.25E-06 | 2.12E-05 |
| 222209_s_at | TMEM135      | -6.62E-03 | 0.004725 | 0.024729 |
| 222212_s_at | LASS2        | -0.01181  | 2.3E-06  | 3.64E-05 |
| 222218_s_at | PILRA        | 0.009348  | 1.08E-05 | 0.000141 |
| 222222_s_at | HOMER3       | 0.004879  | 0.00931  | 0.042199 |
| 222228_s_at | ALKBH4       | -5.32E-03 | 0.0073   | 0.034918 |
| 222236_s_at | ASAP3        | -0.00607  | 0.000286 | 0.002423 |
| 222243_s_at | TOB2         | -0.00834  | 0.003521 | 0.019449 |
| 222245_s_at | FER1L4       | 0.006521  | 0.001049 | 0.007223 |
| 222249_at   |              | 0.012129  | 0.005533 | 0.027968 |
| 222253_s_at | POM121L9P    | 0.01499   | 0.001878 | 0.011628 |
| 222257_s_at | ACE2         | -2.66E-02 | 5.62E-11 | 3.72E-09 |
| 222269_at   | APOOL        | -1.09E-02 | 7.43E-06 | 0.000102 |
| 222271_at   |              | 0.019614  | 1.69E-09 | 6.39E-08 |
| 222275_at   |              | -0.00779  | 5.06E-05 | 0.00055  |
| 222279_at   | LOC285830    | 8.49E-03  | 0.000251 | 0.002171 |
| 222288_at   |              | 0.011019  | 0.001304 | 0.008597 |

|             |          |           |          |          |
|-------------|----------|-----------|----------|----------|
| 222291_at   | FAM149A  | -0.01086  | 3.94E-05 | 0.000444 |
| 222294_s_at | RAB27A   | 0.014044  | 0.000193 | 0.001732 |
| 222297_x_at |          | 0.005047  | 0.001686 | 0.010639 |
| 222312_s_at |          | -0.00617  | 0.007184 | 0.034498 |
| 222335_at   |          | -8.13E-03 | 0.0036   | 0.019831 |
| 222344_at   |          | -0.00945  | 0.001125 | 0.007639 |
| 222352_at   |          | -5.58E-03 | 0.009547 | 0.043044 |
| 266_s_at    | CD24     | 1.24E-02  | 5.55E-07 | 1.04E-05 |
| 31835_at    | HRG      | -1.65E-02 | 5.71E-08 | 1.37E-06 |
| 31845_at    | ELF4     | 0.010998  | 0.000196 | 0.001756 |
| 32069_at    | N4BP1    | 5.69E-03  | 0.010492 | 0.046551 |
| 32091_at    | SLC25A44 | -1.04E-02 | 3.98E-09 | 1.34E-07 |
| 32099_at    | SAFB2    | -0.00666  | 0.001407 | 0.009142 |
| 32128_at    | CCL18    | 0.008663  | 0.00104  | 0.007172 |
| 32209_at    | FAM89B   | 0.004504  | 0.00523  | 0.026758 |
| 32811_at    | MYO1C    | 5.97E-03  | 0.001144 | 0.007733 |
| 33197_at    | MYO7A    | -8.95E-03 | 8.22E-06 | 0.000111 |
| 33304_at    | ISG20    | 0.01825   | 6.77E-08 | 1.59E-06 |
| 33322_i_at  | SFN      | 2.30E-02  | 2.65E-05 | 0.00031  |
| 33323_r_at  | SFN      | 0.028053  | 1.47E-05 | 0.000185 |
| 33494_at    | ETFDH    | -0.01894  | 1.33E-16 | 1.1E-13  |
| 33767_at    | NEFH     | -1.14E-02 | 0.010045 | 0.044896 |
| 34187_at    | RBMS2    | 4.23E-03  | 0.010878 | 0.047879 |
| 34210_at    | CD52     | 3.62E-02  | 3.56E-11 | 2.55E-09 |
| 34408_at    | RTN2     | 6.36E-03  | 0.000776 | 0.00564  |
| 34471_at    | MYH8     | -1.69E-02 | 0.0052   | 0.02664  |
| 34697_at    | LRP6     | -5.06E-03 | 0.001901 | 0.011757 |
| 34726_at    | CACNB3   | 1.02E-02  | 8.03E-07 | 1.44E-05 |
| 34764_at    | LARS2    | -1.22E-02 | 4.33E-05 | 0.00048  |
| 35147_at    | MCF2L    | -8.01E-03 | 0.000318 | 0.002642 |
| 35254_at    | TRAFD1   | 5.84E-03  | 0.001128 | 0.007655 |
| 35820_at    | GM2A     | 7.83E-03  | 0.003003 | 0.017075 |
| 36475_at    | GCAT     | -9.31E-03 | 6.77E-05 | 0.000706 |
| 36499_at    | CELSR2   | 6.82E-03  | 0.000809 | 0.005847 |
| 36566_at    | CTNS     | -0.00809  | 0.000103 | 0.001018 |
| 36829_at    | PER1     | -0.00534  | 0.007349 | 0.03507  |
| 36830_at    | MIPEP    | -0.00783  | 0.000318 | 0.002645 |
| 36920_at    | MTM1     | -1.07E-02 | 3.72E-05 | 0.000421 |
| 36994_at    | ATP6V0C  | -7.67E-03 | 4.67E-06 | 6.76E-05 |
| 37005_at    | NBL1     | 1.04E-02  | 0.000539 | 0.004173 |
| 37012_at    | CAPZB    | 5.22E-03  | 0.005862 | 0.029244 |
| 37022_at    | PRELP    | 4.83E-03  | 0.000139 | 0.001308 |
| 37145_at    | GNLY     | 8.46E-03  | 0.000734 | 0.005399 |
| 37408_at    | MRC2     | 1.04E-02  | 7.84E-05 | 0.000802 |
| 37590_g_at  |          | -0.02384  | 7.61E-14 | 1.31E-11 |
| 37966_at    | PARVB    | -7.79E-03 | 0.001859 | 0.011534 |
| 38149_at    | ARHGAP25 | 2.21E-02  | 1.08E-10 | 6.46E-09 |
| 38158_at    | ESPL1    | -1.35E-02 | 3.04E-10 | 1.5E-08  |
| 38241_at    | BTN3A3   | 6.63E-03  | 0.003275 | 0.018343 |

|            |          |           |          |          |
|------------|----------|-----------|----------|----------|
| 38269_at   | PRKD2    | 5.43E-03  | 0.01061  | 0.04697  |
| 38447_at   | ADRBK1   | 5.79E-03  | 0.009384 | 0.042464 |
| 38487_at   | STAB1    | 1.31E-02  | 2.09E-05 | 0.000253 |
| 38671_at   | PLXND1   | 0.006541  | 0.006036 | 0.029941 |
| 38766_at   | SRCAP    | 4.43E-03  | 0.001177 | 0.007907 |
| 38918_at   | SOX13    | -5.36E-03 | 0.010219 | 0.045519 |
| 38964_r_at | WAS      | 5.13E-03  | 0.005774 | 0.028879 |
| 39248_at   | AQP3     | -6.70E-03 | 0.001487 | 0.009578 |
| 39402_at   | IL1B     | 1.18E-02  | 3.36E-05 | 0.000386 |
| 39729_at   | PRDX2    | -7.11E-03 | 3.14E-06 | 4.76E-05 |
| 39817_s_at | C6orf108 | -1.04E-02 | 0.001667 | 0.010538 |
| 39891_at   | ZNF710   | 4.31E-03  | 0.004665 | 0.024493 |
| 40016_g_at | MAST4    | -1.57E-02 | 2.01E-11 | 1.57E-09 |
| 40225_at   | GAK      | -7.28E-03 | 0.000262 | 0.002252 |
| 40255_at   | DDX28    | -6.90E-03 | 0.000169 | 0.001548 |
| 40273_at   | SPHK2    | -1.60E-02 | 1.53E-08 | 4.34E-07 |
| 40560_at   | TBX2     | -9.91E-03 | 2.62E-05 | 0.000307 |
| 40665_at   | FMO3     | 1.31E-02  | 0.00027  | 0.002304 |
| 40837_at   | TLE2     | 0.007245  | 0.008851 | 0.040528 |
| 41160_at   | MBD3     | -6.55E-03 | 0.000592 | 0.004515 |
| 41329_at   | SCYL3    | 3.76E-03  | 0.007104 | 0.034179 |
| 41386_i_at | KDM6B    | -9.14E-03 | 0.003875 | 0.02102  |
| 41553_at   | OSGIN2   | -6.02E-03 | 0.00011  | 0.001078 |
| 41577_at   | PPP1R16B | -2.81E-02 | 9.09E-17 | 9.14E-14 |
| 41660_at   | CELSR1   | -1.42E-02 | 5.16E-09 | 1.68E-07 |
| 43427_at   | ACACB    | -8.42E-03 | 6.05E-05 | 0.000643 |
| 43977_at   | TMEM161A | -3.90E-03 | 0.008974 | 0.040967 |
| 44065_at   | C12orf52 | -1.29E-02 | 9.89E-07 | 1.74E-05 |
| 44120_at   | ADCK2    | 5.38E-03  | 0.005118 | 0.026362 |
| 44654_at   | G6PC3    | -7.91E-03 | 0.001256 | 0.008329 |
| 44673_at   | SIGLEC1  | 1.36E-02  | 3.72E-07 | 7.28E-06 |
| 44696_at   | TBC1D13  | -1.92E-02 | 9.41E-15 | 2.68E-12 |
| 44790_s_at | C13orf18 | 2.22E-02  | 2.82E-08 | 7.39E-07 |
| 45288_at   | ABHD6    | -2.23E-02 | 5.38E-16 | 2.99E-13 |
| 45297_at   | EHD2     | 1.37E-02  | 1.31E-07 | 2.89E-06 |
| 45526_g_at | NAT15    | -9.23E-03 | 1.24E-06 | 2.11E-05 |
| 45828_at   | ATP5SL   | -5.07E-03 | 0.004663 | 0.02449  |
| 46665_at   | SEMA4C   | 7.82E-03  | 0.00042  | 0.003368 |
| 47069_at   | PRR5     | -1.12E-02 | 0.000907 | 0.006441 |
| 47560_at   | LPHN1    | 1.09E-02  | 3.23E-06 | 4.89E-05 |
| 48030_i_at | C5orf4   | 8.33E-03  | 0.005405 | 0.027471 |
| 48808_at   | DHFR     | -1.02E-02 | 0.000259 | 0.00223  |
| 49306_at   | RASSF4   | -1.12E-02 | 1.18E-06 | 2.02E-05 |
| 49329_at   | KLHL22   | -5.36E-03 | 0.000107 | 0.001052 |
| 49452_at   | ACACB    | -8.05E-03 | 0.000382 | 0.003102 |
| 49679_s_at | MMP24    | -8.67E-03 | 2.53E-05 | 0.000298 |
| 50400_at   | PAOX     | -6.53E-03 | 0.000982 | 0.006846 |
| 51146_at   | PIGV     | -6.48E-03 | 0.000345 | 0.002836 |
| 52078_at   | TMEM222  | -3.65E-03 | 0.006165 | 0.030418 |



|                      |              |           |          |          |
|----------------------|--------------|-----------|----------|----------|
| 52651_at             | COL8A2       | 4.08E-03  | 0.002066 | 0.012587 |
| 52940_at             | LOC100294402 | -1.68E-02 | 3E-09    | 1.06E-07 |
| 53720_at             | C19orf66     | 7.43E-03  | 0.00024  | 0.002093 |
| 54037_at             | HPS4         | -5.36E-03 | 0.00054  | 0.004176 |
| 55872_at             | ZNF512B      | -1.18E-02 | 0.000455 | 0.003608 |
| 56748_at             | TRIM10       | -9.76E-03 | 1.27E-05 | 0.000162 |
| 57539_at             | ZGPAT        | -1.97E-02 | 7.09E-07 | 1.29E-05 |
| 57540_at             | RBKS         | -9.84E-03 | 7.46E-06 | 0.000103 |
| 57715_at             | CALHM2       | 5.75E-03  | 0.000181 | 0.00165  |
| 59625_at             | NOL3         | -7.41E-03 | 0.000755 | 0.005516 |
| 60474_at             | FERMT1       | -8.78E-03 | 0.002306 | 0.01375  |
| 632_at               | GSK3A        | -7.80E-03 | 4.55E-05 | 0.000501 |
| 64064_at             | GIMAP5       | 1.21E-02  | 9E-06    | 0.00012  |
| 64408_s_at           | CALML4       | -1.41E-02 | 3.74E-07 | 7.29E-06 |
| 64418_at             | SYNRG        | -4.96E-03 | 0.008296 | 0.038527 |
| 64488_at             | IRGQ         | -5.78E-03 | 0.001335 | 0.008775 |
| 65718_at             | GPR124       | 3.90E-03  | 0.004677 | 0.024526 |
| 89977_at             | ACSM5        | -2.45E-02 | 5.13E-10 | 2.32E-08 |
| 90265_at             | ADAP1        | 4.26E-03  | 0.00668  | 0.032451 |
| 90610_at             | LRCH4        | 7.99E-03  | 0.000193 | 0.001732 |
| 91703_at             | EHBP1L1      | 8.85E-03  | 1.83E-05 | 0.000224 |
| 91826_at             | EPS8L1       | 9.54E-03  | 0.000648 | 0.004868 |
| AFFX-BioB-3_at       |              | -1.88E-02 | 0.00335  | 0.018704 |
| AFFX-BioB-5_at       |              | -1.99E-02 | 0.003232 | 0.018148 |
| AFFX-BioB-M_at       |              | -1.92E-02 | 0.003202 | 0.01801  |
| AFFX-HSAC07/X0035    | ACTB         | 8.22E-03  | 0.003612 | 0.019887 |
| AFFX-HUMGAPDH/M      | GAPDH        | -7.25E-03 | 7.69E-05 | 0.000789 |
| AFFX-HUMISGF3A/M     | STAT1        | 8.49E-03  | 0.000267 | 0.002286 |
| AFFX-HUMISGF3A/M     | STAT1        | 1.17E-02  | 4.51E-06 | 6.58E-05 |
| AFFX-HUMISGF3A/M     | STAT1        | 9.89E-03  | 0.002405 | 0.014255 |
| AFFX-HUMISGF3A/M     | STAT1        | 8.21E-03  | 0.000216 | 0.001906 |
| AFFX-r2-Ec-bioB-3_at |              | -1.78E-02 | 0.004363 | 0.023175 |
| AFFX-r2-Ec-bioB-5_at |              | -2.02E-02 | 0.002704 | 0.015663 |
| AFFX-r2-Ec-bioB-M_at |              | -2.02E-02 | 0.002522 | 0.014793 |
