# Supplementary material for: Human Kidney Tubule-Specific Gene Expression Based Dissection of Chronic Kidney Disease Traits
Source: PubMed Central journal article supplement — eBioMedicine. 2017 Sep 17;24:267–76. doi: 10.1016/j.ebiom.2017.09.014 (PMC5652292; doi:10.1016/j.ebiom.2017.09.014), 2017-09-17
Supplement: mmc4.pdf [file mmc4.pdf]

**Table S4**

| <b>probe</b> | <b>gene</b> | <b>effect</b> | <b>p.val</b> | <b>FDR</b> |
|--------------|-------------|---------------|--------------|------------|
| 1294_at      | UBA7        | 0.008294      | 3.06E-03     | 2.65E-02   |
| 1405_i_at    | CCL5        | 0.032435      | 4.03E-10     | 1.28E-07   |
| 177_at       | PLD1        | -0.01376      | 1.20E-05     | 3.10E-04   |
| 200012_x_at  | RPL21       | 0.004165      | 2.01E-03     | 1.91E-02   |
| 200017_at    | RPS27A      | 0.005617      | 1.14E-03     | 1.22E-02   |
| 200018_at    | RPS13       | 0.004572      | 6.60E-03     | 4.70E-02   |
| 200019_s_at  | FAU         | 0.007561      | 3.67E-03     | 3.06E-02   |
| 200025_s_at  | RPL27       | 0.004336      | 4.83E-03     | 3.75E-02   |
| 200028_s_at  | STARD7      | -0.00448      | 4.65E-03     | 3.63E-02   |
| 200030_s_at  | SLC25A3     | -0.00544      | 3.50E-03     | 2.95E-02   |
| 200032_s_at  | RPL9        | 0.006555      | 8.49E-05     | 1.53E-03   |
| 200037_s_at  | CBX3        | 0.006836      | 4.77E-03     | 3.71E-02   |
| 200042_at    | C22orf28    | -0.00553      | 7.06E-03     | 4.94E-02   |
| 200059_s_at  | RHOA        | 0.008155      | 4.14E-05     | 8.43E-04   |
| 200062_s_at  | RPL30       | 0.008623      | 3.19E-04     | 4.46E-03   |
| 200073_s_at  | HNRNPD      | 0.004079      | 2.84E-03     | 2.50E-02   |
| 200092_s_at  | RPL37       | 0.003413      | 2.66E-03     | 2.37E-02   |
| 200095_x_at  | RPS10       | 0.005392      | 4.08E-04     | 5.39E-03   |
| 200099_s_at  | RPS3A       | 0.006774      | 3.82E-05     | 7.88E-04   |
| 200606_at    | DSP         | -0.0076       | 1.34E-03     | 1.39E-02   |
| 200614_at    | CLTC        | -0.0055       | 3.02E-03     | 2.62E-02   |
| 200621_at    | CSRP1       | 0.007937      | 1.02E-04     | 1.77E-03   |
| 200632_s_at  | NDRG1       | -0.00696      | 2.99E-04     | 4.25E-03   |
| 200639_s_at  | YWHAZ       | 0.00694       | 3.57E-04     | 4.86E-03   |
| 200640_at    | YWHAZ       | 0.005085      | 3.45E-03     | 2.92E-02   |
| 200642_at    | SOD1        | -0.00651      | 5.17E-05     | 1.02E-03   |
| 200644_at    | MARCKSL1    | 0.020638      | 1.49E-10     | 6.52E-08   |
| 200653_s_at  | CALM1       | -0.00525      | 1.23E-04     | 2.07E-03   |
| 200655_s_at  | CALM1       | -0.00536      | 1.43E-04     | 2.34E-03   |
| 200657_at    | SLC25A5     | -0.00997      | 2.63E-08     | 2.77E-06   |
| 200659_s_at  | PHB         | -0.0085       | 3.38E-03     | 2.87E-02   |
| 200660_at    | S100A11     | 0.01521       | 8.02E-06     | 2.25E-04   |
| 200661_at    | CTSA        | -0.00981      | 6.89E-03     | 4.85E-02   |
| 200664_s_at  | DNAJB1      | -0.00783      | 7.11E-03     | 4.97E-02   |
| 200665_s_at  | SPARC       | 0.010806      | 1.18E-03     | 1.26E-02   |
| 200684_s_at  | UBE2L3      | -0.00903      | 8.77E-04     | 9.87E-03   |
| 200690_at    | HSPA9       | -0.0102       | 1.20E-03     | 1.27E-02   |
| 200691_s_at  | HSPA9       | -0.01112      | 1.12E-06     | 4.89E-05   |
| 200692_s_at  | HSPA9       | -0.00834      | 1.35E-06     | 5.59E-05   |
| 200708_at    | GOT2        | -0.00769      | 2.87E-04     | 4.10E-03   |
| 200715_x_at  | RPL13A      | 0.007289      | 2.11E-05     | 4.86E-04   |
| 200734_s_at  | ARF3        | -0.00826      | 3.53E-03     | 2.97E-02   |
| 200741_s_at  | RPS27       | 0.009589      | 4.05E-04     | 5.36E-03   |
| 200742_s_at  | TPP1        | -0.00822      | 9.44E-04     | 1.05E-02   |
| 200743_s_at  | TPP1        | -0.00755      | 3.84E-03     | 3.16E-02   |
| 200748_s_at  | FTH1        | -0.00533      | 1.19E-03     | 1.26E-02   |
| 200757_s_at  | CALU        | 0.008416      | 1.05E-03     | 1.14E-02   |

|             |         |          |          |          |
|-------------|---------|----------|----------|----------|
| 200758_s_at | NFE2L1  | -0.00995 | 8.78E-04 | 9.88E-03 |
| 200759_x_at | NFE2L1  | -0.00648 | 1.75E-03 | 1.72E-02 |
| 200761_s_at | ARL6IP5 | 0.007415 | 7.14E-03 | 4.99E-02 |
| 200768_s_at | MAT2A   | -0.01194 | 9.24E-09 | 1.26E-06 |
| 200769_s_at | MAT2A   | -0.01085 | 2.90E-04 | 4.13E-03 |
| 200771_at   | LAMC1   | 0.01077  | 7.46E-05 | 1.38E-03 |
| 200772_x_at | PTMA    | 0.007969 | 6.81E-05 | 1.27E-03 |
| 200773_x_at | PTMA    | 0.007423 | 7.49E-06 | 2.14E-04 |
| 200781_s_at | RPS15A  | 0.008249 | 7.91E-04 | 0.009097 |
| 200782_at   | ANXA5   | 0.008432 | 4.76E-03 | 3.71E-02 |
| 200783_s_at | STMN1   | 0.006461 | 1.30E-03 | 1.36E-02 |
| 200788_s_at | PEA15   | 0.010801 | 3.31E-05 | 7.04E-04 |
| 200789_at   | ECH1    | -0.01065 | 7.84E-04 | 9.05E-03 |
| 200791_s_at | IQGAP1  | 0.007247 | 3.49E-03 | 2.94E-02 |
| 200793_s_at | ACO2    | -0.0237  | 4.26E-08 | 3.97E-06 |
| 200795_at   | SPARCL1 | 0.01112  | 2.52E-03 | 2.28E-02 |
| 200804_at   | TMBIM6  | -0.00921 | 5.21E-03 | 3.97E-02 |
| 200806_s_at | HSPD1   | -0.00857 | 2.17E-03 | 2.02E-02 |
| 200807_s_at | HSPD1   | -0.00874 | 2.56E-08 | 2.72E-06 |
| 200808_s_at | ZYX     | 0.011298 | 7.65E-05 | 1.41E-03 |
| 200817_x_at | RPS10   | 0.00812  | 1.00E-04 | 1.75E-03 |
| 200829_x_at | ZNF207  | 0.005121 | 3.05E-03 | 2.64E-02 |
| 200831_s_at | SCD     | -0.01054 | 4.04E-03 | 3.29E-02 |
| 200832_s_at | SCD     | -0.01629 | 2.86E-03 | 2.51E-02 |
| 200838_at   | CTSB    | -0.01112 | 9.05E-04 | 1.01E-02 |
| 200839_s_at | CTSB    | -0.00864 | 9.01E-05 | 1.60E-03 |
| 200849_s_at | AHCYL1  | -0.0073  | 4.79E-03 | 3.72E-02 |
| 200850_s_at | AHCYL1  | -0.00758 | 6.64E-03 | 4.73E-02 |
| 200858_s_at | RPS8    | 0.007376 | 3.41E-04 | 4.69E-03 |
| 200864_s_at | RAB11A  | 0.009274 | 6.92E-03 | 4.87E-02 |
| 200872_at   | S100A10 | 0.013351 | 4.73E-07 | 2.42E-05 |
| 200887_s_at | STAT1   | 0.01082  | 1.85E-03 | 1.79E-02 |
| 200892_s_at | TRA2B   | 0.006945 | 2.83E-04 | 4.06E-03 |
| 200896_x_at | HDGF    | -0.00515 | 5.22E-06 | 1.61E-04 |
| 200897_s_at | PALLD   | 0.009218 | 3.48E-04 | 0.004762 |
| 200903_s_at | AHCY    | -0.01758 | 1.10E-06 | 4.84E-05 |
| 200904_at   | HLA-E   | 0.011077 | 2.47E-03 | 2.25E-02 |
| 200905_x_at | HLA-E   | 0.008087 | 2.50E-03 | 2.27E-02 |
| 200906_s_at | PALLD   | 0.007164 | 5.92E-03 | 4.37E-02 |
| 200907_s_at | PALLD   | 0.00894  | 2.90E-04 | 4.13E-03 |
| 200908_s_at | RPLP2   | 0.007399 | 6.20E-06 | 1.84E-04 |
| 200909_s_at | RPLP2   | 0.010133 | 2.34E-03 | 2.15E-02 |
| 200921_s_at | BTG1    | 0.006492 | 5.00E-04 | 6.34E-03 |
| 200924_s_at | SLC3A2  | -0.00992 | 1.17E-03 | 1.24E-02 |
| 200933_x_at | RPS4X   | 0.003557 | 3.45E-03 | 2.91E-02 |
| 200934_at   | DEK     | 0.006552 | 4.36E-03 | 3.47E-02 |
| 200946_x_at | GLUD1   | -0.01322 | 5.38E-09 | 8.32E-07 |
| 200947_s_at | GLUD1   | -0.01587 | 2.93E-09 | 5.4E-07  |
| 200948_at   | MLF2    | -0.00566 | 1.45E-03 | 1.47E-02 |

|             |          |          |          |          |
|-------------|----------|----------|----------|----------|
| 200951_s_at | CCND2    | 0.014014 | 4.42E-08 | 4.04E-06 |
| 200952_s_at | CCND2    | 0.026566 | 2.88E-11 | 2.15E-08 |
| 200953_s_at | CCND2    | 0.028843 | 8.62E-13 | 1.86E-09 |
| 200954_at   | ATP6V0C  | -0.00703 | 7.16E-05 | 1.33E-03 |
| 200955_at   | IMMT     | -0.00691 | 4.12E-03 | 0.033254 |
| 200958_s_at | SDCBP    | 0.005571 | 5.02E-03 | 3.86E-02 |
| 200961_at   | SEPHS2   | -0.01193 | 5.41E-10 | 1.52E-07 |
| 200963_x_at | RPL31    | 0.005012 | 6.04E-05 | 0.001153 |
| 200975_at   | PPT1     | 0.005429 | 4.60E-03 | 3.62E-02 |
| 200978_at   | MDH1     | -0.01326 | 7.23E-08 | 5.75E-06 |
| 200979_at   | PDHA1    | -0.01437 | 2.17E-05 | 4.96E-04 |
| 200980_s_at | PDHA1    | -0.00463 | 4.76E-03 | 0.037068 |
| 200986_at   | SERPING1 | 0.019633 | 1.16E-04 | 0.001965 |
| 200998_s_at | CKAP4    | 0.009135 | 1.33E-04 | 2.20E-03 |
| 200999_s_at | CKAP4    | 0.008781 | 4.25E-04 | 5.56E-03 |
| 201004_at   | SSR4     | 0.013724 | 3.90E-03 | 0.031958 |
| 201006_at   | PRDX2    | -0.00626 | 2.25E-04 | 3.36E-03 |
| 201007_at   | HADHB    | -0.00967 | 4.27E-07 | 2.23E-05 |
| 201008_s_at | TXNIP    | 0.008868 | 3.40E-03 | 0.028934 |
| 201009_s_at | TXNIP    | 0.01101  | 5.62E-03 | 0.041895 |
| 201010_s_at | TXNIP    | 0.008986 | 2.37E-04 | 0.003514 |
| 201012_at   | ANXA1    | 0.026318 | 1.21E-08 | 1.53E-06 |
| 201020_at   | YWHAH    | 0.010119 | 4.01E-03 | 0.032693 |
| 201029_s_at | CD99     | 0.004783 | 5.43E-03 | 4.10E-02 |
| 201030_x_at | LDHB     | -0.00553 | 3.12E-05 | 0.000673 |
| 201034_at   | ADD3     | -0.01254 | 7.24E-09 | 1.04E-06 |
| 201035_s_at | HADH     | -0.02105 | 2.05E-08 | 2.29E-06 |
| 201036_s_at | HADH     | -0.02127 | 1.13E-10 | 5.76E-08 |
| 201037_at   | PFKP     | 0.011856 | 1.22E-03 | 0.012843 |
| 201040_at   | GNAI2    | 0.008267 | 6.19E-03 | 4.51E-02 |
| 201049_s_at | RPS18    | 0.008898 | 7.96E-05 | 1.46E-03 |
| 201061_s_at | STOM     | -0.00788 | 3.64E-04 | 4.93E-03 |
| 201063_at   | RCN1     | 0.011183 | 4.51E-05 | 9.05E-04 |
| 201069_at   | MMP2     | 0.010058 | 5.74E-04 | 7.03E-03 |
| 201089_at   | ATP6V1B2 | -0.01374 | 1.24E-05 | 0.000316 |
| 201090_x_at | TUBA1B   | 0.008345 | 7.35E-04 | 8.59E-03 |
| 201093_x_at | SDHA     | -0.00788 | 0.002704 | 0.02405  |
| 201102_s_at | PFKL     | -0.00677 | 6.55E-03 | 4.68E-02 |
| 201105_at   | LGALS1   | 0.024642 | 1.21E-06 | 5.15E-05 |
| 201116_s_at | CPE      | 0.013015 | 4.48E-03 | 3.54E-02 |
| 201120_s_at | PGRMC1   | -0.01111 | 1.32E-04 | 0.002189 |
| 201121_s_at | PGRMC1   | -0.00666 | 0.001001 | 0.01099  |
| 201127_s_at | ACLY     | -0.00691 | 2.49E-03 | 2.26E-02 |
| 201135_at   | ECHS1    | -0.01794 | 2.55E-09 | 4.82E-07 |
| 201136_at   | PLP2     | 0.025136 | 4.67E-10 | 1.39E-07 |
| 201137_s_at | HLA-DPB1 | 0.026732 | 3.12E-08 | 3.08E-06 |
| 201140_s_at | RAB5C    | -0.00751 | 1.47E-03 | 1.49E-02 |
| 201141_at   | GPNMB    | 0.01349  | 0.004498 | 0.035558 |
| 201157_s_at | NMT1     | -0.0088  | 4.86E-03 | 0.03767  |

|             |           |          |          |          |
|-------------|-----------|----------|----------|----------|
| 201163_s_at | IGFBP7    | 0.008058 | 9.05E-04 | 0.010118 |
| 201178_at   | FBXO7     | -0.0076  | 1.04E-04 | 0.001807 |
| 201186_at   | LRPAP1    | -0.00651 | 8.68E-04 | 0.009782 |
| 201188_s_at | ITPR3     | 0.011056 | 3.16E-04 | 0.004435 |
| 201189_s_at | ITPR3     | 0.006921 | 5.89E-03 | 0.04357  |
| 201193_at   | IDH1      | -0.01635 | 6.62E-08 | 5.4E-06  |
| 201212_at   | LGMN      | -0.0125  | 1.33E-04 | 0.002195 |
| 201227_s_at | NDUFB8    | -0.00563 | 3.58E-03 | 0.03001  |
| 201242_s_at | ATP1B1    | -0.01141 | 1.58E-06 | 6.31E-05 |
| 201243_s_at | ATP1B1    | -0.00551 | 1.01E-03 | 0.011078 |
| 201254_x_at | RPS6      | 0.004156 | 1.25E-03 | 0.013086 |
| 201257_x_at | RPS3A     | 0.006008 | 1.15E-05 | 0.000299 |
| 201261_x_at | BGN       | 0.012507 | 3.63E-03 | 0.030325 |
| 201268_at   | NME1-NME2 | 0.006468 | 1.24E-03 | 0.012994 |
| 201272_at   | AKR1B1    | 0.010339 | 4.81E-05 | 0.000955 |
| 201278_at   | DAB2      | -0.00681 | 6.38E-04 | 7.69E-03 |
| 201279_s_at | DAB2      | -0.01266 | 1.32E-06 | 5.5E-05  |
| 201280_s_at | DAB2      | -0.01344 | 1.67E-05 | 4.05E-04 |
| 201282_at   | OGDH      | -0.01293 | 4.07E-03 | 0.033066 |
| 201284_s_at | APEH      | -0.01036 | 5.03E-04 | 0.006363 |
| 201286_at   | SDC1      | -0.01252 | 0.000428 | 0.005595 |
| 201288_at   | ARHGDI1B  | 0.020116 | 1.35E-09 | 3.04E-07 |
| 201289_at   | CYR61     | 0.012948 | 0.005825 | 0.043157 |
| 201290_at   | SEC11A    | 0.003082 | 2.36E-03 | 2.16E-02 |
| 201291_s_at | TOP2A     | 0.014163 | 2.39E-04 | 3.54E-03 |
| 201310_s_at | C5orf13   | -0.0119  | 8.96E-05 | 0.001595 |
| 201313_at   | ENO2      | 0.022807 | 6.94E-08 | 5.58E-06 |
| 201315_x_at | IFITM2    | 0.023386 | 2.35E-06 | 8.6E-05  |
| 201319_at   | MYL12A    | 0.007007 | 2.54E-06 | 9.18E-05 |
| 201324_at   | EMP1      | 0.011926 | 2.08E-03 | 0.019592 |
| 201325_s_at | EMP1      | 0.00888  | 7.48E-04 | 0.008698 |
| 201339_s_at | SCP2      | -0.00945 | 3.24E-05 | 0.000695 |
| 201347_x_at | GRHPR     | -0.01682 | 5.22E-07 | 2.64E-05 |
| 201348_at   | GPX3      | -0.00784 | 1.44E-04 | 0.00235  |
| 201349_at   | SLC9A3R1  | -0.01602 | 5.55E-10 | 1.53E-07 |
| 201368_at   | ZFP36L2   | 0.007015 | 0.000286 | 0.004099 |
| 201391_at   | TRAP1     | -0.01175 | 3.19E-07 | 1.79E-05 |
| 201398_s_at | TRAM1     | 0.007503 | 6.65E-04 | 0.007945 |
| 201406_at   | RPL36A    | 0.006613 | 1.48E-03 | 0.014956 |
| 201410_at   | PLEKHB2   | -0.00784 | 1.34E-03 | 0.013857 |
| 201415_at   | GSS       | -0.01337 | 4.32E-08 | 3.99E-06 |
| 201416_at   | SOX4      | 0.018875 | 9.66E-06 | 2.63E-04 |
| 201425_at   | ALDH2     | -0.01341 | 8.30E-09 | 1.16E-06 |
| 201426_s_at | VIM       | 0.01839  | 3.37E-07 | 1.87E-05 |
| 201428_at   | CLDN4     | 0.013282 | 7.43E-04 | 0.00865  |
| 201432_at   | CAT       | -0.01178 | 1.27E-05 | 0.000324 |
| 201438_at   | COL6A3    | 0.011502 | 5.41E-03 | 0.040894 |
| 201489_at   | PPIF      | -0.00968 | 2.25E-06 | 8.34E-05 |
| 201494_at   | PRCP      | -0.00574 | 0.000478 | 0.00608  |

|             |          |          |          |          |
|-------------|----------|----------|----------|----------|
| 201497_x_at | MYH11    | 0.011601 | 4.44E-03 | 0.035167 |
| 201506_at   | TGFBI    | 0.016553 | 3.26E-04 | 0.004543 |
| 201512_s_at | TOMM70A  | -0.00861 | 3.93E-06 | 0.00013  |
| 201539_s_at | FHL1     | 0.016211 | 6.55E-04 | 0.007845 |
| 201540_at   | FHL1     | 0.014946 | 1.07E-04 | 0.001839 |
| 201550_x_at | ACTG1    | 0.006031 | 1.59E-03 | 0.01579  |
| 201556_s_at | VAMP2    | -0.00698 | 0.00021  | 0.003182 |
| 201560_at   | CLIC4    | -0.00807 | 0.002748 | 0.024386 |
| 201562_s_at | SORD     | -0.02254 | 4.15E-09 | 6.95E-07 |
| 201563_at   | SORD     | -0.01988 | 9.41E-09 | 1.27E-06 |
| 201567_s_at | GOLGA4   | -0.00599 | 1.62E-03 | 0.016072 |
| 201568_at   | UQCRQ    | -0.00877 | 0.003407 | 0.028934 |
| 201569_s_at | SAMM50   | -0.01124 | 3.24E-05 | 0.000695 |
| 201570_at   | SAMM50   | -0.01218 | 1.76E-05 | 0.000419 |
| 201590_x_at | ANXA2    | 0.02019  | 7.89E-08 | 6.08E-06 |
| 201599_at   | OAT      | -0.01232 | 3.69E-06 | 0.000124 |
| 201601_x_at | IFITM1   | 0.021677 | 1.53E-06 | 6.17E-05 |
| 201612_at   | ALDH9A1  | -0.00779 | 0.000382 | 0.005129 |
| 201619_at   | PRDX3    | -0.00917 | 5.56E-06 | 0.000169 |
| 201621_at   | NBL1     | 0.009654 | 0.002338 | 0.021479 |
| 201640_x_at | CLPTM1   | -0.00741 | 9.21E-05 | 0.001629 |
| 201641_at   | BST2     | 0.013883 | 9.09E-05 | 0.001614 |
| 201645_at   | TNC      | 0.019808 | 8.09E-06 | 0.000226 |
| 201649_at   | UBE2L6   | 0.007762 | 1.79E-03 | 0.017442 |
| 201650_at   | KRT19    | 0.016077 | 0.00047  | 0.005996 |
| 201651_s_at | PACSIN2  | -0.00734 | 4.64E-05 | 0.000928 |
| 201656_at   | ITGA6    | -0.00657 | 0.002182 | 0.020276 |
| 201666_at   | TIMP1    | 0.033154 | 4.3E-10  | 1.33E-07 |
| 201667_at   | GJA1     | 0.020318 | 1.66E-06 | 6.59E-05 |
| 201668_x_at | MARCKS   | 0.013699 | 3.47E-07 | 1.91E-05 |
| 201669_s_at | MARCKS   | 0.018057 | 2.84E-06 | 0.0001   |
| 201670_s_at | MARCKS   | 0.016691 | 7.50E-08 | 5.91E-06 |
| 201675_at   | AKAP1    | -0.00683 | 0.006889 | 0.048532 |
| 201682_at   | PMPCB    | -0.00793 | 3.35E-05 | 0.00071  |
| 201695_s_at | PNP      | -0.01541 | 4.99E-05 | 0.000986 |
| 201701_s_at | PGRMC2   | -0.00737 | 4.70E-03 | 0.036739 |
| 201708_s_at | NIPSNAP1 | -0.01722 | 0.000136 | 0.002241 |
| 201709_s_at | NIPSNAP1 | -0.0088  | 7.93E-05 | 0.001451 |
| 201714_at   | TUBG1    | -0.01518 | 5.99E-06 | 0.000179 |
| 201718_s_at | EPB41L2  | 0.011901 | 1.96E-04 | 0.003017 |
| 201719_s_at | EPB41L2  | 0.016184 | 4.18E-08 | 3.92E-06 |
| 201720_s_at | LAPTM5   | 0.019314 | 2.82E-05 | 0.000616 |
| 201721_s_at | LAPTM5   | 0.022726 | 8.52E-06 | 0.000236 |
| 201723_s_at | GALNT1   | 0.006896 | 3.98E-03 | 0.032525 |
| 201728_s_at | KIAA0100 | -0.01054 | 2.78E-03 | 0.024561 |
| 201739_at   | SGK1     | -0.0116  | 2.02E-06 | 7.61E-05 |
| 201740_at   | NDUFS3   | -0.00766 | 2.25E-03 | 0.020854 |
| 201743_at   | CD14     | 0.012577 | 1.14E-04 | 0.001937 |
| 201744_s_at | LUM      | 0.025826 | 4.57E-05 | 0.000916 |

|             |          |          |          |          |
|-------------|----------|----------|----------|----------|
| 201746_at   | TP53     | 0.009613 | 1.67E-03 | 0.016525 |
| 201752_s_at | ADD3     | -0.00767 | 0.000341 | 0.00469  |
| 201756_at   | RPA2     | 0.007133 | 2.37E-03 | 0.021614 |
| 201761_at   | MTHFD2   | 0.016484 | 0.000187 | 0.002897 |
| 201763_s_at | DAXX     | 0.008655 | 4.50E-03 | 0.035585 |
| 201785_at   | RNASE1   | 0.023479 | 1.8E-06  | 6.94E-05 |
| 201787_at   | FBLN1    | 0.009187 | 0.000308 | 0.004349 |
| 201792_at   | AEBP1    | 0.014059 | 0.00031  | 0.004368 |
| 201798_s_at | MYOF     | 0.017298 | 1.57E-05 | 0.000387 |
| 201799_s_at | OSBP     | -0.00999 | 1.2E-05  | 0.00031  |
| 201802_at   | SLC29A1  | 0.008752 | 0.000594 | 0.007243 |
| 201818_at   | LPCAT1   | 0.007695 | 0.003188 | 0.027365 |
| 201823_s_at | RNF14    | -0.00668 | 0.002209 | 0.020492 |
| 201829_at   | NET1     | -0.00701 | 3.18E-03 | 0.02728  |
| 201830_s_at | NET1     | -0.00936 | 8.23E-04 | 0.009391 |
| 201842_s_at | EFEMP1   | 0.01154  | 0.000198 | 0.003033 |
| 201848_s_at | BNIP3    | -0.01495 | 2.00E-09 | 4.02E-07 |
| 201849_at   | BNIP3    | -0.01148 | 1.67E-05 | 0.000405 |
| 201851_at   | SH3GL1   | -0.00609 | 0.002518 | 0.02278  |
| 201852_x_at | COL3A1   | 0.018723 | 0.000519 | 0.006531 |
| 201858_s_at | SRGN     | 0.020094 | 6.31E-05 | 0.001197 |
| 201859_at   | SRGN     | 0.016358 | 0.000177 | 0.002787 |
| 201874_at   | MPZL1    | 0.012583 | 0.003728 | 0.030909 |
| 201876_at   | PON2     | 0.009093 | 0.001303 | 0.013579 |
| 201889_at   | FAM3C    | 0.008579 | 4.88E-03 | 3.78E-02 |
| 201890_at   | RRM2     | 0.010217 | 2.57E-03 | 0.023129 |
| 201891_s_at | B2M      | 0.00892  | 2.86E-07 | 1.67E-05 |
| 201893_x_at | DCN      | 0.015959 | 0.000218 | 0.003285 |
| 201900_s_at | AKR1A1   | -0.01369 | 6.65E-05 | 0.00125  |
| 201903_at   | UQCRC1   | -0.01315 | 0.000107 | 0.001845 |
| 201917_s_at | SLC25A36 | -0.00764 | 7.79E-05 | 0.001431 |
| 201918_at   | SLC25A36 | -0.00929 | 5.20E-04 | 6.54E-03 |
| 201919_at   | SLC25A36 | -0.01008 | 2.09E-05 | 0.000483 |
| 201925_s_at | CD55     | 0.013784 | 5.65E-06 | 0.000171 |
| 201926_s_at | CD55     | 0.01491  | 1.19E-06 | 5.09E-05 |
| 201931_at   | ETFA     | -0.01504 | 5.53E-09 | 8.36E-07 |
| 201934_at   | WDR82    | 0.007531 | 0.003203 | 0.027453 |
| 201939_at   | PLK2     | 0.014789 | 1.02E-06 | 4.59E-05 |
| 201954_at   | ARPC1B   | 0.010308 | 0.000104 | 0.001801 |
| 201963_at   | ACSL1    | -0.01817 | 3.44E-10 | 1.18E-07 |
| 201965_s_at | SETX     | 0.00579  | 3.46E-03 | 0.029229 |
| 201968_s_at | PGM1     | -0.00974 | 2.86E-05 | 0.000625 |
| 201971_s_at | ATP6V1A  | -0.00967 | 6.40E-03 | 0.04597  |
| 202002_at   | ACAA2    | -0.00885 | 0.000118 | 0.00199  |
| 202003_s_at | ACAA2    | -0.01498 | 4.8E-10  | 1.41E-07 |
| 202016_at   | MEST     | 0.013566 | 7.64E-05 | 0.00141  |
| 202017_at   | EPHX1    | -0.01157 | 1.10E-03 | 0.011855 |
| 202018_s_at | LTF      | 0.036799 | 2.04E-05 | 0.000474 |
| 202025_x_at | ACAA1    | -0.01926 | 6.31E-09 | 9.19E-07 |

|             |          |          |          |          |
|-------------|----------|----------|----------|----------|
| 202026_at   | SDHD     | -0.0119  | 3.4E-05  | 0.00072  |
| 202027_at   | TMEM184B | 0.008528 | 0.001424 | 0.014481 |
| 202028_s_at | RPL38    | 0.00436  | 0.004367 | 0.034764 |
| 202035_s_at | SFRP1    | 0.011034 | 3.35E-04 | 0.004639 |
| 202037_s_at | SFRP1    | 0.012388 | 0.003704 | 0.030804 |
| 202053_s_at | ALDH3A2  | -0.01421 | 1.67E-06 | 6.6E-05  |
| 202054_s_at | ALDH3A2  | -0.01231 | 0.000166 | 0.002647 |
| 202070_s_at | IDH3A    | -0.00756 | 0.002099 | 0.019738 |
| 202074_s_at | OPTN     | -0.00558 | 0.004282 | 0.034276 |
| 202077_at   | NDUFAB1  | -0.00767 | 0.000893 | 0.010009 |
| 202084_s_at | SEC14L1  | 0.009838 | 0.005138 | 0.039227 |
| 202086_at   | MX1      | 0.009329 | 5.27E-03 | 0.04002  |
| 202087_s_at | CTSL1    | -0.00776 | 2.84E-04 | 0.004071 |
| 202088_at   | SLC39A6  | 0.009295 | 0.000544 | 0.006744 |
| 202096_s_at | TSPO     | 0.007545 | 0.006355 | 0.045801 |
| 202104_s_at | SPG7     | -0.00909 | 0.006686 | 0.047507 |
| 202108_at   | PEPD     | -0.02719 | 1.10E-11 | 1.03E-08 |
| 202112_at   | VWF      | 0.017501 | 0.000223 | 0.003339 |
| 202116_at   | DPF2     | 0.006613 | 0.003126 | 0.026959 |
| 202117_at   | ARHGAP1  | 0.00623  | 0.006022 | 0.044245 |
| 202119_s_at | CPNE3    | -0.00735 | 3.79E-03 | 0.031309 |
| 202139_at   | AKR7A2   | -0.01353 | 3.22E-04 | 0.004498 |
| 202156_s_at | CELF2    | 0.009012 | 0.000177 | 0.002776 |
| 202157_s_at | CELF2    | 0.012207 | 4.35E-03 | 0.034727 |
| 202158_s_at | CELF2    | 0.015043 | 6.72E-05 | 0.001261 |
| 202178_at   | PRKCZ    | -0.0102  | 0.000551 | 0.006819 |
| 202191_s_at | GAS7     | 0.012179 | 0.000196 | 0.003011 |
| 202192_s_at | GAS7     | 0.007864 | 0.006298 | 0.045537 |
| 202196_s_at | DKK3     | 0.014848 | 3.84E-06 | 0.000127 |
| 202206_at   | ARL4C    | 0.017902 | 0.000432 | 0.005637 |
| 202207_at   | ARL4C    | 0.021573 | 0.000107 | 0.001843 |
| 202208_s_at | ARL4C    | 0.007664 | 0.002001 | 0.019037 |
| 202209_at   | LSM3     | -0.00723 | 0.000115 | 0.001953 |
| 202210_x_at | GSK3A    | -0.00747 | 0.000599 | 0.00729  |
| 202217_at   | C21orf33 | -0.01548 | 9.98E-07 | 4.48E-05 |
| 202235_at   | SLC16A1  | -0.01213 | 0.002971 | 0.025897 |
| 202236_s_at | SLC16A1  | -0.01197 | 0.006232 | 0.045265 |
| 202237_at   | NNMT     | 0.036791 | 7.6E-10  | 1.9E-07  |
| 202238_s_at | NNMT     | 0.033535 | 1.25E-09 | 2.85E-07 |
| 202242_at   | TSPAN7   | -0.01098 | 0.000146 | 0.002372 |
| 202250_s_at | DCAF8    | -0.00845 | 0.001403 | 0.014321 |
| 202255_s_at | SIPA1L1  | -0.00896 | 0.001577 | 0.015693 |
| 202266_at   | TDP2     | -0.0138  | 2.8E-06  | 9.92E-05 |
| 202267_at   | LAMC2    | 0.00886  | 0.001473 | 0.014873 |
| 202271_at   | FBXO28   | -0.01118 | 0.0001   | 0.001746 |
| 202272_s_at | FBXO28   | -0.01058 | 8.21E-04 | 0.009369 |
| 202275_at   | G6PD     | 0.004915 | 5.57E-03 | 0.041697 |
| 202279_at   | C14orf2  | -0.00859 | 5.52E-05 | 0.001077 |
| 202280_at   |          | -0.00844 | 0.000457 | 0.005887 |

|             |          |          |          |          |
|-------------|----------|----------|----------|----------|
| 202286_s_at | TACSTD2  | 0.018943 | 5.22E-05 | 0.001026 |
| 202291_s_at | MGP      | 0.021127 | 2.92E-05 | 6.35E-04 |
| 202295_s_at | CTSH     | -0.0124  | 5.01E-06 | 0.000156 |
| 202299_s_at | HBXIP    | -0.01036 | 3.35E-05 | 0.00071  |
| 202300_at   | HBXIP    | -0.01122 | 0.000275 | 0.003973 |
| 202303_x_at | SMARCA5  | 0.005535 | 0.002286 | 0.021096 |
| 202307_s_at | TAP1     | 0.016125 | 1.63E-08 | 1.93E-06 |
| 202309_at   | MTHFD1   | -0.01358 | 5.56E-09 | 8.36E-07 |
| 202310_s_at | COL1A1   | 0.018774 | 0.000125 | 0.002095 |
| 202311_s_at | COL1A1   | 0.011314 | 0.000367 | 0.004971 |
| 202313_at   | PPP2R2A  | -0.00597 | 0.000224 | 0.003349 |
| 202325_s_at | ATP5J    | -0.00492 | 0.001332 | 0.013805 |
| 202345_s_at | FABP5    | 0.011369 | 0.001466 | 0.014811 |
| 202350_s_at | MATN2    | 0.010837 | 0.00308  | 0.026629 |
| 202353_s_at | PSMD12   | -0.0126  | 2.19E-06 | 8.15E-05 |
| 202371_at   | TCEAL4   | 0.005944 | 0.005363 | 0.040561 |
| 202382_s_at | GNPDA1   | -0.01328 | 4.13E-06 | 0.000135 |
| 202391_at   | BASP1    | 0.017049 | 0.002803 | 0.024729 |
| 202403_s_at | COL1A2   | 0.018056 | 7.42E-05 | 0.001377 |
| 202404_s_at | COL1A2   | 0.020802 | 0.000345 | 0.004731 |
| 202411_at   | IFI27    | 0.01392  | 0.000248 | 0.003642 |
| 202422_s_at | ACSL4    | 0.015203 | 6.63E-05 | 0.001249 |
| 202427_s_at | BRP44    | -0.00639 | 0.000198 | 0.00303  |
| 202430_s_at | PLSCR1   | 0.012762 | 0.001081 | 0.011676 |
| 202435_s_at | CYP1B1   | 0.017975 | 2.26E-06 | 8.35E-05 |
| 202436_s_at | CYP1B1   | 0.02827  | 1.51E-09 | 3.29E-07 |
| 202437_s_at | CYP1B1   | 0.023879 | 1.21E-08 | 1.53E-06 |
| 202440_s_at | ST5      | 0.010492 | 0.00122  | 0.012859 |
| 202441_at   | ERLIN1   | -0.00735 | 0.000552 | 0.006819 |
| 202443_x_at | NOTCH2   | 0.010149 | 1.05E-05 | 0.000281 |
| 202446_s_at | PLSCR1   | 0.015201 | 1.6E-07  | 1.04E-05 |
| 202447_at   | DECR1    | -0.00956 | 7.53E-08 | 5.91E-06 |
| 202449_s_at | RXRA     | -0.00871 | 0.00011  | 0.001878 |
| 202450_s_at | CTSK     | 0.01475  | 0.000843 | 0.00955  |
| 202456_s_at | ZER1     | -0.00897 | 0.000951 | 0.010533 |
| 202475_at   | TMEM147  | -0.00658 | 1.79E-03 | 0.017442 |
| 202484_s_at | MBD2     | 0.005293 | 0.000818 | 0.00935  |
| 202488_s_at | FXYD3    | 0.008175 | 0.002435 | 0.022152 |
| 202489_s_at | FXYD3    | 0.014168 | 0.000175 | 0.002754 |
| 202497_x_at | SLC2A3   | 0.012089 | 1.02E-03 | 0.011157 |
| 202498_s_at | SLC2A3   | 0.011935 | 0.006008 | 0.044169 |
| 202499_s_at | SLC2A3   | 0.015023 | 0.003109 | 0.026836 |
| 202502_at   | ACADM    | -0.01548 | 1.90E-05 | 0.000446 |
| 202503_s_at | KIAA0101 | 0.01353  | 9.58E-05 | 0.001685 |
| 202504_at   | TRIM29   | 0.01108  | 2.07E-05 | 0.00048  |
| 202510_s_at | TNFAIP2  | 0.015115 | 0.000134 | 0.002213 |
| 202532_s_at | DHFR     | -0.01304 | 0.000438 | 0.005707 |
| 202533_s_at | DHFR     | -0.01023 | 0.00079  | 0.00909  |
| 202579_x_at | HMGN4    | 0.005236 | 0.006393 | 0.045924 |



|             |         |          |          |          |
|-------------|---------|----------|----------|----------|
| 202590_s_at | PDK2    | -0.02048 | 7.81E-08 | 6.06E-06 |
| 202598_at   | S100A13 | 0.02116  | 3.76E-10 | 1.27E-07 |
| 202603_at   | ADAM10  | 0.007031 | 0.003828 | 0.031584 |
| 202614_at   | SLC30A9 | -0.00683 | 7.22E-06 | 0.000207 |
| 202622_s_at | ATXN2   | -0.00761 | 1.79E-05 | 0.000425 |
| 202625_at   | LYN     | 0.015287 | 0.000137 | 0.002254 |
| 202626_s_at | LYN     | 0.011187 | 0.000119 | 0.002014 |
| 202630_at   | APPBP2  | -0.00622 | 0.006274 | 0.045445 |
| 202637_s_at | ICAM1   | 0.012771 | 0.000499 | 0.006328 |
| 202638_s_at | ICAM1   | 0.009972 | 0.005539 | 0.041489 |
| 202643_s_at | TNFAIP3 | 0.008043 | 3.30E-04 | 0.004581 |
| 202644_s_at | TNFAIP3 | 0.012672 | 3.19E-05 | 0.000686 |
| 202648_at   |         | 0.011946 | 0.005148 | 0.039277 |
| 202649_x_at | RPS19   | 0.01368  | 0.000796 | 0.009129 |
| 202659_at   | PSMB10  | 0.011703 | 3.36E-06 | 0.000116 |
| 202661_at   | ITPR2   | -0.0135  | 7.29E-05 | 0.001354 |
| 202663_at   | WIPF1   | 0.007403 | 0.001348 | 0.013904 |
| 202665_s_at | WIPF1   | 0.007808 | 5.33E-04 | 0.006651 |
| 202669_s_at | EFNB2   | 0.009123 | 0.002439 | 0.022168 |
| 202675_at   | SDHB    | -0.01177 | 0.000163 | 0.002603 |
| 202685_s_at | AXL     | 0.008888 | 0.000183 | 0.002845 |
| 202686_s_at | AXL     | 0.018383 | 2.78E-07 | 1.62E-05 |
| 202690_s_at | SNRPD1  | 0.007399 | 0.000668 | 0.007959 |
| 202693_s_at | STK17A  | 0.014136 | 1.22E-05 | 0.000312 |
| 202719_s_at | TES     | 0.009782 | 0.0031   | 0.026775 |
| 202720_at   | TES     | 0.016078 | 2.2E-06  | 8.16E-05 |
| 202727_s_at | IFNGR1  | 0.012777 | 8.69E-05 | 0.001558 |
| 202729_s_at | LTBP1   | 0.01196  | 0.003876 | 0.031838 |
| 202731_at   | PDCD4   | 0.00811  | 0.005491 | 0.041226 |
| 202733_at   | P4HA2   | -0.01779 | 6.31E-07 | 3.12E-05 |
| 202735_at   | EBP     | -0.00959 | 1.10E-05 | 0.00029  |
| 202737_s_at | LSM4    | -0.00563 | 0.006308 | 0.045582 |
| 202738_s_at | PHKB    | -0.00736 | 4.21E-05 | 0.000852 |
| 202739_s_at | PHKB    | -0.00714 | 0.004928 | 0.03804  |
| 202740_at   | ABHD14A | -0.03064 | 5.58E-11 | 3.36E-08 |
| 202746_at   | ITM2A   | 0.020398 | 2.81E-08 | 2.84E-06 |
| 202747_s_at | ITM2A   | 0.016284 | 0.000119 | 0.002015 |
| 202748_at   | GBP2    | 0.02171  | 8.31E-08 | 6.27E-06 |
| 202752_x_at | SLC7A8  | -0.02887 | 3.58E-07 | 1.95E-05 |
| 202759_s_at | AKAP2   | -0.00801 | 0.006805 | 0.048081 |
| 202763_at   | CASP3   | 0.009442 | 4.72E-05 | 0.000941 |
| 202765_s_at | FBN1    | 0.010495 | 0.001424 | 0.014481 |
| 202772_at   | HMGCL   | -0.01532 | 1.68E-07 | 1.08E-05 |
| 202780_at   | OXCT1   | -0.01121 | 0.004416 | 0.03505  |
| 202783_at   | NNT     | -0.01268 | 5.93E-05 | 0.001137 |
| 202784_s_at | NNT     | -0.01163 | 1.14E-06 | 4.96E-05 |
| 202803_s_at | ITGB2   | 0.018616 | 4.62E-06 | 0.000146 |
| 202804_at   | ABCC1   | 0.012198 | 0.000175 | 0.002762 |
| 202820_at   | AHR     | 0.015897 | 2.03E-05 | 0.000473 |

|             |          |          |          |          |
|-------------|----------|----------|----------|----------|
| 202825_at   | SLC25A4  | -0.01077 | 1.74E-06 | 6.79E-05 |
| 202830_s_at | SLC37A4  | -0.01626 | 1.03E-06 | 4.61E-05 |
| 202833_s_at | SERPINA1 | -0.01564 | 5.51E-05 | 0.001076 |
| 202834_at   | AGT      | -0.02288 | 9.39E-08 | 6.93E-06 |
| 202847_at   | PCK2     | -0.02467 | 2.18E-09 | 4.27E-07 |
| 202850_at   | ABCD3    | -0.00705 | 0.003745 | 0.030999 |
| 202859_x_at | IL8      | 0.017123 | 0.003182 | 0.027326 |
| 202862_at   | FAH      | -0.01925 | 5.63E-06 | 0.000171 |
| 202864_s_at | SP100    | 0.011109 | 4.65E-06 | 0.000147 |
| 202866_at   | DNAJB12  | -0.00695 | 0.004261 | 0.034145 |
| 202867_s_at | DNAJB12  | -0.00943 | 0.005178 | 0.039477 |
| 202872_at   | ATP6V1C1 | -0.01001 | 0.000665 | 0.007945 |
| 202874_s_at | ATP6V1C1 | -0.00626 | 0.004219 | 0.033901 |
| 202888_s_at | ANPEP    | -0.01972 | 4.44E-06 | 0.000143 |
| 202889_x_at | MAP7     | -0.01693 | 3.04E-07 | 1.74E-05 |
| 202890_at   | MAP7     | -0.01192 | 4.77E-06 | 0.000149 |
| 202891_at   | NIT1     | -0.00985 | 0.000105 | 0.001815 |
| 202898_at   | SDC3     | 0.014589 | 8.63E-08 | 6.47E-06 |
| 202901_x_at | CTSS     | 0.016038 | 1.82E-05 | 0.000431 |
| 202902_s_at | CTSS     | 0.022528 | 3.05E-07 | 1.74E-05 |
| 202912_at   | ADM      | -0.01131 | 0.001801 | 0.017559 |
| 202920_at   | ANK2     | -0.02435 | 1.9E-06  | 7.24E-05 |
| 202921_s_at | ANK2     | -0.01699 | 0.00156  | 0.015566 |
| 202922_at   | GCLC     | -0.01121 | 0.000367 | 0.004975 |
| 202923_s_at | GCLC     | -0.01388 | 4.47E-06 | 0.000143 |
| 202925_s_at | PLAGL2   | -0.0078  | 0.000636 | 0.007673 |
| 202930_s_at | SUCLA2   | -0.01164 | 2.07E-05 | 0.00048  |
| 202931_x_at | BIN1     | -0.01165 | 0.00014  | 0.002299 |
| 202935_s_at | SOX9     | 0.016672 | 0.000362 | 0.004908 |
| 202936_s_at | SOX9     | 0.016948 | 0.000168 | 0.00266  |
| 202941_at   | NDUFV2   | -0.00798 | 0.000912 | 0.010169 |
| 202942_at   | ETFB     | -0.01219 | 0.000116 | 0.001973 |
| 202947_s_at | GYPC     | 0.016113 | 7.77E-06 | 0.00022  |
| 202949_s_at | FHL2     | 0.019559 | 6.23E-07 | 3.11E-05 |
| 202950_at   | CRYZ     | -0.00665 | 0.001892 | 0.018175 |
| 202953_at   | C1QB     | 0.013244 | 0.006309 | 0.045582 |
| 202957_at   | HCLS1    | 0.023363 | 4.13E-07 | 2.18E-05 |
| 202959_at   | MUT      | -0.00877 | 0.000864 | 0.009754 |
| 202960_s_at | MUT      | -0.01127 | 4.41E-06 | 0.000142 |
| 202962_at   | KIF13B   | -0.00937 | 0.001091 | 0.011759 |
| 202965_s_at | CAPN6    | 0.016949 | 0.000197 | 0.003025 |
| 202966_at   | CAPN6    | 0.011541 | 0.002098 | 0.019738 |
| 202968_s_at | DYRK2    | 0.007594 | 0.004211 | 0.033858 |
| 202972_s_at | FAM13A   | -0.00832 | 5.96E-05 | 0.001142 |
| 202974_at   | MPP1     | -0.01572 | 4.05E-05 | 0.000827 |
| 202982_s_at | ACOT1    | -0.01876 | 1.84E-05 | 0.000435 |
| 202988_s_at | RGS1     | 0.018122 | 0.000865 | 0.009754 |
| 202990_at   | PYGL     | 0.007639 | 3.50E-03 | 0.029506 |
| 202992_at   | C7       | 0.014437 | 0.000968 | 0.010682 |

|             |         |          |          |          |
|-------------|---------|----------|----------|----------|
| 202994_s_at | FBLN1   | 0.015469 | 0.000405 | 0.00536  |
| 203016_s_at | SSX2IP  | -0.00901 | 0.003152 | 0.027147 |
| 203017_s_at | SSX2IP  | -0.01    | 0.002828 | 0.024919 |
| 203018_s_at | SSX2IP  | -0.00937 | 0.00131  | 0.013634 |
| 203021_at   | SLPI    | 0.034871 | 1.17E-06 | 5.04E-05 |
| 203029_s_at | PTPRN2  | 0.011765 | 0.000258 | 0.003763 |
| 203030_s_at | PTPRN2  | 0.016978 | 1.72E-05 | 0.000415 |
| 203032_s_at | FH      | -0.01066 | 0.003834 | 0.031594 |
| 203033_x_at | FH      | -0.01029 | 9.30E-07 | 4.27E-05 |
| 203039_s_at | NDUFS1  | -0.01236 | 2.21E-05 | 0.000503 |
| 203041_s_at | LAMP2   | -0.00849 | 0.000352 | 0.004806 |
| 203042_at   | LAMP2   | -0.01077 | 0.000718 | 0.008422 |
| 203065_s_at | CAV1    | 0.013036 | 0.000438 | 0.005703 |
| 203066_at   | CHST15  | 0.018886 | 1.08E-05 | 0.000286 |
| 203067_at   | PDHX    | -0.01039 | 2.69E-05 | 0.000594 |
| 203068_at   | KLHL21  | -0.00744 | 0.001762 | 0.017264 |
| 203071_at   | SEMA3B  | -0.00756 | 0.000536 | 0.006688 |
| 203083_at   | THBS2   | 0.01542  | 0.001659 | 0.016395 |
| 203104_at   | CSF1R   | 0.015083 | 0.002548 | 0.022974 |
| 203115_at   | FECH    | -0.01118 | 0.000301 | 0.004276 |
| 203129_s_at | KIF5C   | 0.008148 | 0.002229 | 0.020655 |
| 203131_at   | PDGFRA  | 0.019038 | 0.000469 | 0.005996 |
| 203132_at   | RB1     | 0.016105 | 4.4E-05  | 0.000885 |
| 203134_at   | PICALM  | -0.00644 | 0.000216 | 0.003252 |
| 203139_at   | DAPK1   | 0.007902 | 0.000658 | 0.007878 |
| 203145_at   | SPAG5   | -0.03073 | 2.64E-12 | 3.92E-09 |
| 203151_at   | MAP1A   | 0.007138 | 0.006275 | 0.045445 |
| 203154_s_at | PAK4    | -0.00732 | 0.001252 | 0.013125 |
| 203157_s_at | GLS     | -0.01455 | 6.17E-06 | 0.000184 |
| 203158_s_at | GLS     | -0.01732 | 4.89E-09 | 7.73E-07 |
| 203159_at   | GLS     | -0.01509 | 1.7E-13  | 7.55E-10 |
| 203164_at   | SLC33A1 | -0.00867 | 0.000354 | 0.004826 |
| 203166_at   | CFDP1   | -0.00862 | 6.21E-05 | 0.001182 |
| 203167_at   | TIMP2   | 0.012689 | 0.002352 | 0.021544 |
| 203178_at   | GATM    | -0.0161  | 7.54E-06 | 0.000215 |
| 203180_at   | ALDH1A3 | 0.011629 | 0.000246 | 0.003625 |
| 203185_at   | RASSF2  | 0.014071 | 4.94E-05 | 0.000978 |
| 203186_s_at | S100A4  | 0.020211 | 1.09E-05 | 0.000287 |
| 203188_at   | B3GNT1  | -0.00738 | 0.003282 | 0.028053 |
| 203190_at   | NDUFS8  | -0.00685 | 0.001189 | 0.012602 |
| 203199_s_at | MTRR    | -0.01013 | 0.000258 | 0.003761 |
| 203200_s_at | MTRR    | -0.01118 | 1.54E-03 | 0.015436 |
| 203206_at   | FAM53B  | -0.00757 | 0.002036 | 0.019303 |
| 203207_s_at | MTFR1   | -0.01793 | 8.22E-10 | 2.01E-07 |
| 203208_s_at | MTFR1   | -0.01299 | 7.91E-07 | 3.74E-05 |
| 203217_s_at | ST3GAL5 | 0.014279 | 0.00073  | 0.008539 |
| 203220_s_at | TLE1    | 0.010231 | 0.000446 | 0.005773 |
| 203221_at   | TLE1    | 0.014003 | 2.09E-05 | 0.000483 |
| 203236_s_at | LGALS9  | 0.006001 | 0.004774 | 0.037134 |

|             |          |          |          |          |
|-------------|----------|----------|----------|----------|
| 203240_at   | FCGBP    | 0.0074   | 0.002401 | 0.021875 |
| 203256_at   | CDH3     | 0.018776 | 8.02E-07 | 3.78E-05 |
| 203261_at   | DCTN6    | -0.00529 | 0.002116 | 0.019862 |
| 203273_s_at | TUSC2    | -0.00541 | 0.006052 | 0.044394 |
| 203278_s_at | PHF21A   | 0.007981 | 0.000457 | 0.005887 |
| 203280_at   | SAFB2    | -0.00789 | 4.21E-05 | 0.000852 |
| 203300_x_at | AP1S2    | 0.013376 | 0.000408 | 0.005388 |
| 203302_at   | DCK      | 0.012641 | 0.002132 | 0.019977 |
| 203316_s_at | SNRPE    | 0.005626 | 0.000246 | 0.003625 |
| 203323_at   | CAV2     | 0.007149 | 6.78E-03 | 0.047939 |
| 203332_s_at | INPP5D   | 0.008524 | 0.005132 | 0.039207 |
| 203335_at   | PHYH     | -0.01828 | 1.41E-10 | 6.52E-08 |
| 203340_s_at | SLC25A12 | -0.0052  | 0.005711 | 0.042382 |
| 203344_s_at | RBBP8    | 0.008    | 0.003197 | 0.027412 |
| 203348_s_at | ETV5     | 0.006202 | 5.31E-03 | 0.040287 |
| 203350_at   | AP1G1    | -0.00532 | 0.001225 | 0.012895 |
| 203352_at   | ORC4     | -0.00925 | 0.001842 | 0.017871 |
| 203355_s_at | PSD3     | 0.014561 | 0.000342 | 0.004704 |
| 203372_s_at | SOCS2    | -0.01103 | 0.000713 | 0.008378 |
| 203381_s_at | APOE     | -0.02511 | 4.57E-06 | 0.000145 |
| 203382_s_at | APOE     | -0.01579 | 9.43E-06 | 0.000258 |
| 203385_at   | DGKA     | 0.027181 | 3.93E-08 | 3.71E-06 |
| 203397_s_at | GALNT3   | 0.011162 | 0.001756 | 0.017218 |
| 203402_at   | KCNAB2   | -0.01546 | 6.75E-07 | 3.29E-05 |
| 203409_at   | DDB2     | 0.005656 | 0.004611 | 0.036201 |
| 203411_s_at | LMNA     | 0.006274 | 0.003448 | 0.029143 |
| 203414_at   | MMD      | 0.012047 | 7.68E-06 | 0.000218 |
| 203416_at   | CD53     | 0.029665 | 2.45E-07 | 1.46E-05 |
| 203423_at   | RBP1     | 0.017689 | 1.27E-07 | 8.9E-06  |
| 203433_at   | MTHFS    | -0.0144  | 2.25E-08 | 2.45E-06 |
| 203434_s_at | MME      | -0.02131 | 1.2E-06  | 5.1E-05  |
| 203435_s_at | MME      | -0.02357 | 6.96E-08 | 5.58E-06 |
| 203438_at   | STC2     | -0.01751 | 3.68E-05 | 0.000763 |
| 203439_s_at | STC2     | -0.01073 | 0.000139 | 0.002282 |
| 203458_at   | SPR      | -0.00903 | 0.000194 | 0.002986 |
| 203465_at   | MRPL19   | -0.00626 | 0.004399 | 0.034952 |
| 203466_at   | MPV17    | -0.00921 | 0.00216  | 0.020156 |
| 203471_s_at | PLEK     | 0.021358 | 1.43E-07 | 9.64E-06 |
| 203474_at   | IQGAP2   | -0.0176  | 1.19E-06 | 5.1E-05  |
| 203476_at   | TPBG     | 0.018199 | 2.45E-07 | 1.46E-05 |
| 203478_at   | NDUFC1   | -0.00755 | 3.27E-05 | 0.000699 |
| 203484_at   | SEC61G   | 0.007048 | 0.003032 | 0.026276 |
| 203485_at   | RTN1     | 0.011824 | 0.000738 | 0.008607 |
| 203490_at   | ELF4     | 0.005887 | 0.004139 | 0.03341  |
| 203499_at   | EPHA2    | 0.007389 | 0.005074 | 0.038833 |
| 203500_at   | GCDH     | -0.01374 | 3.08E-05 | 0.000667 |
| 203501_at   | PGCP     | -0.00586 | 0.006395 | 0.045928 |
| 203508_at   | TNFRSF1B | 0.01262  | 3.09E-05 | 0.000668 |
| 203510_at   | MET      | 0.006104 | 0.004178 | 0.033673 |

|             |          |          |          |          |
|-------------|----------|----------|----------|----------|
| 203514_at   | MAP3K3   | 0.005318 | 0.004626 | 0.036239 |
| 203516_at   | SNTA1    | -0.00836 | 0.000133 | 0.002204 |
| 203523_at   | LSP1     | 0.01014  | 0.001267 | 0.013261 |
| 203524_s_at | MPST     | -0.0091  | 0.000378 | 0.005096 |
| 203533_s_at | CUL5     | -0.00762 | 0.004733 | 0.03694  |
| 203535_at   | S100A9   | 0.010305 | 0.000352 | 0.004806 |
| 203536_s_at | CIAO1    | -0.00669 | 0.007123 | 0.049787 |
| 203541_s_at | KLF9     | -0.00709 | 0.002907 | 0.025425 |
| 203542_s_at | KLF9     | -0.01194 | 0.000935 | 0.010392 |
| 203543_s_at | KLF9     | -0.01677 | 9.63E-06 | 0.000262 |
| 203546_at   | IPO13    | -0.01474 | 8.15E-08 | 6.19E-06 |
| 203547_at   | CD4      | 0.011511 | 0.0002   | 0.003056 |
| 203551_s_at | COX11    | -0.00876 | 0.00015  | 0.002418 |
| 203557_s_at | PCBD1    | -0.00945 | 0.000668 | 0.007962 |
| 203559_s_at | ABP1     | -0.02666 | 1.95E-05 | 0.000456 |
| 203560_at   | GGH      | -0.01994 | 5.51E-06 | 0.000168 |
| 203561_at   | FCGR2A   | 0.015381 | 0.000213 | 0.003221 |
| 203562_at   | FEZ1     | 0.010342 | 0.004618 | 0.036207 |
| 203566_s_at | AGL      | -0.00758 | 0.004091 | 0.033101 |
| 203570_at   | LOXL1    | 0.006633 | 0.004849 | 0.037585 |
| 203594_at   | RTCD1    | -0.00945 | 8.82E-06 | 0.000243 |
| 203603_s_at | ZEB2     | 0.017459 | 0.000237 | 0.003518 |
| 203606_at   | NDUFS6   | -0.0041  | 0.004375 | 0.034798 |
| 203608_at   | ALDH5A1  | -0.01803 | 1.63E-05 | 0.000398 |
| 203609_s_at | ALDH5A1  | -0.01467 | 8.29E-07 | 3.89E-05 |
| 203619_s_at | FAIM2    | 0.006656 | 0.001796 | 0.017515 |
| 203627_at   | IGF1R    | -0.0109  | 0.002052 | 0.019408 |
| 203628_at   | IGF1R    | -0.00872 | 0.00424  | 0.034024 |
| 203635_at   | DSCR3    | -0.00852 | 0.007006 | 0.049126 |
| 203636_at   | MID1     | 0.008791 | 0.006838 | 0.048269 |
| 203637_s_at | MID1     | 0.011435 | 0.002541 | 0.022934 |
| 203645_s_at | CD163    | 0.020451 | 3.17E-06 | 0.00011  |
| 203646_at   | FDX1     | -0.00642 | 0.004175 | 0.033664 |
| 203647_s_at | FDX1     | -0.01272 | 2.61E-10 | 1.02E-07 |
| 203658_at   | SLC25A20 | -0.01178 | 0.005905 | 0.043659 |
| 203661_s_at | TMOD1    | 0.011664 | 0.000413 | 0.005441 |
| 203663_s_at | COX5A    | -0.00653 | 7.83E-05 | 0.001436 |
| 203665_at   | HMOX1    | -0.01316 | 0.000532 | 0.006649 |
| 203669_s_at | DGAT1    | -0.00528 | 0.005476 | 0.041205 |
| 203671_at   | TPMT     | -0.0127  | 4.25E-06 | 0.000139 |
| 203672_x_at | TPMT     | -0.00785 | 1.8E-05  | 0.000428 |
| 203673_at   | TG       | -0.00848 | 0.000423 | 0.005555 |
| 203675_at   | NUCB2    | 0.008958 | 0.005069 | 0.038833 |
| 203682_s_at | IVD      | -0.01651 | 9.29E-08 | 6.87E-06 |
| 203697_at   | FRZB     | 0.014384 | 0.000338 | 0.00466  |
| 203698_s_at | FRZB     | 0.015443 | 0.000498 | 0.006319 |
| 203711_s_at | HIBCH    | -0.01933 | 1.98E-10 | 7.89E-08 |
| 203716_s_at | DPP4     | -0.01121 | 0.004926 | 0.03804  |
| 203722_at   | ALDH4A1  | -0.01846 | 1.29E-05 | 0.000328 |

|             |           |          |          |          |
|-------------|-----------|----------|----------|----------|
| 203725_at   | GADD45A   | -0.01367 | 6.02E-08 | 5.06E-06 |
| 203727_at   | SKIV2L    | -0.00634 | 0.001053 | 0.011441 |
| 203732_at   | TRIP4     | -0.00873 | 4.1E-05  | 0.000836 |
| 203753_at   | TCF4      | 0.017414 | 3.3E-05  | 0.000703 |
| 203758_at   | CTSO      | 0.007381 | 0.00117  | 0.012445 |
| 203760_s_at | SLA       | 0.008316 | 0.001124 | 0.012063 |
| 203761_at   | SLA       | 0.017508 | 1.63E-05 | 0.000398 |
| 203769_s_at | STS       | 0.009334 | 0.003246 | 0.027779 |
| 203775_at   | SLC25A13  | -0.01531 | 1.9E-06  | 7.24E-05 |
| 203779_s_at | MPZL2     | 0.013444 | 1.17E-05 | 0.000303 |
| 203780_at   | MPZL2     | 0.013546 | 5.5E-05  | 0.001075 |
| 203787_at   | SSBP2     | 0.009046 | 0.001399 | 0.014296 |
| 203790_s_at | HRSP12    | -0.02651 | 1.14E-10 | 5.76E-08 |
| 203791_at   | DMXL1     | -0.01105 | 1.61E-06 | 6.4E-05  |
| 203792_x_at | PCGF2     | -0.01163 | 3.49E-05 | 0.00073  |
| 203799_at   | CD302     | 0.015762 | 3.57E-05 | 0.000743 |
| 203812_at   |           | 0.010769 | 0.00623  | 0.045265 |
| 203814_s_at | NQO2      | -0.02458 | 8.92E-09 | 1.23E-06 |
| 203824_at   | TSPAN8    | 0.019204 | 0.00034  | 0.004675 |
| 203827_at   | WIPI1     | -0.00777 | 0.001315 | 0.013677 |
| 203832_at   | SNRPF     | 0.005203 | 0.006781 | 0.047957 |
| 203851_at   | IGFBP6    | 0.019479 | 3.01E-06 | 0.000105 |
| 203853_s_at | GAB2      | 0.006792 | 0.002133 | 0.019977 |
| 203859_s_at | PALM      | -0.00902 | 0.000146 | 0.002372 |
| 203860_at   | PCCA      | -0.01061 | 1.22E-07 | 8.65E-06 |
| 203868_s_at | VCAM1     | 0.00901  | 0.006821 | 0.048162 |
| 203882_at   | IRF9      | 0.007655 | 0.00278  | 0.024575 |
| 203886_s_at | FBLN2     | 0.008783 | 0.001378 | 0.014136 |
| 203892_at   | WFDC2     | 0.02963  | 5.44E-10 | 1.52E-07 |
| 203894_at   | TUBG2     | -0.00859 | 0.000131 | 0.002178 |
| 203896_s_at | PLCB4     | 0.010904 | 0.002941 | 0.025682 |
| 203897_at   | LYRM1     | -0.00984 | 0.000371 | 0.005023 |
| 203900_at   | KIAA0467  | -0.0059  | 0.003014 | 0.02619  |
| 203908_at   | SLC4A4    | -0.02993 | 1.36E-12 | 2.33E-09 |
| 203910_at   | ARHGAP29  | 0.00851  | 0.005072 | 0.038833 |
| 203913_s_at | HPGD      | -0.02063 | 1.58E-05 | 0.000388 |
| 203914_x_at | HPGD      | -0.02672 | 4.33E-09 | 7.15E-07 |
| 203917_at   | CXADR     | 0.013555 | 2.55E-05 | 0.000564 |
| 203922_s_at | CYBB      | 0.020604 | 1.46E-05 | 0.000367 |
| 203923_s_at | CYBB      | 0.018169 | 1.75E-05 | 0.000418 |
| 203924_at   | GSTA1     | -0.03213 | 5.89E-09 | 8.75E-07 |
| 203926_x_at | ATP5D     | -0.00818 | 0.001128 | 0.012099 |
| 203927_at   | NFKBIE    | 0.006248 | 0.001365 | 0.014029 |
| 203928_x_at | MAPT      | -0.01772 | 3.6E-05  | 0.000749 |
| 203929_s_at | MAPT      | -0.0192  | 9.29E-07 | 4.27E-05 |
| 203930_s_at | MAPT      | -0.02201 | 0.000442 | 0.005739 |
| 203932_at   | HLA-DMB   | 0.012681 | 0.000269 | 0.003904 |
| 203933_at   | RAB11FIP3 | -0.01183 | 5.88E-05 | 0.001128 |
| 203936_s_at | MMP9      | 0.007277 | 0.001269 | 0.013272 |

|             |          |          |          |          |
|-------------|----------|----------|----------|----------|
| 203937_s_at | TAF1C    | -0.00547 | 0.006796 | 0.048044 |
| 203945_at   | ARG2     | -0.00486 | 0.005608 | 0.041863 |
| 203950_s_at | CLCN6    | -0.01107 | 0.001917 | 0.018385 |
| 203953_s_at | CLDN3    | 0.009546 | 0.000405 | 0.00536  |
| 203964_at   | NMI      | 0.011876 | 9.85E-06 | 0.000266 |
| 203966_s_at | PPM1A    | -0.00709 | 0.002602 | 0.023331 |
| 203971_at   | SLC31A1  | -0.01258 | 5.74E-08 | 4.88E-06 |
| 203972_s_at | PEX3     | -0.00981 | 0.000474 | 0.006043 |
| 203979_at   | CYP27A1  | -0.01158 | 1.18E-05 | 0.000306 |
| 203986_at   | FAM47E   | -0.01077 | 0.000256 | 0.003737 |
| 204000_at   | GNB5     | -0.00883 | 0.000216 | 0.003258 |
| 204006_s_at | FCGR3A   | 0.011046 | 0.006283 | 0.045457 |
| 204019_s_at | SH3YL1   | -0.01177 | 8.84E-05 | 0.001579 |
| 204027_s_at | METTL1   | -0.01302 | 5.54E-05 | 0.001077 |
| 204031_s_at | PCBP2    | -0.00815 | 0.003667 | 0.030564 |
| 204032_at   | BCAR3    | -0.00975 | 0.002176 | 0.020251 |
| 204036_at   | LPAR1    | 0.015432 | 0.000144 | 0.00235  |
| 204037_at   | LPAR1    | 0.01912  | 3.72E-06 | 0.000124 |
| 204038_s_at | LPAR1    | 0.017651 | 1.48E-05 | 0.00037  |
| 204041_at   | MAOB     | -0.01344 | 1.41E-05 | 0.000355 |
| 204043_at   | TCN2     | -0.01393 | 8.71E-05 | 0.00156  |
| 204044_at   | QPRT     | -0.02267 | 8.67E-09 | 1.21E-06 |
| 204057_at   | IRF8     | 0.018165 | 1.51E-08 | 1.83E-06 |
| 204066_s_at | AGAP1    | -0.01343 | 0.000538 | 0.006699 |
| 204067_at   | SUOX     | -0.01459 | 7.54E-06 | 0.000215 |
| 204083_s_at | TPM2     | 0.015027 | 1.59E-05 | 0.000391 |
| 204103_at   | CCL4     | 0.008688 | 0.001327 | 0.01376  |
| 204105_s_at | NRCAM    | -0.0118  | 0.001876 | 0.018056 |
| 204114_at   | NID2     | 0.009776 | 0.00507  | 0.038833 |
| 204115_at   | GNG11    | 0.012457 | 6.92E-06 | 0.000201 |
| 204116_at   | IL2RG    | 0.023179 | 3.06E-06 | 0.000106 |
| 204118_at   | CD48     | 0.033844 | 7.35E-08 | 5.81E-06 |
| 204122_at   | TYROBP   | 0.019107 | 0.000123 | 0.002065 |
| 204125_at   | NDUFAF1  | -0.00889 | 0.002163 | 0.020182 |
| 204130_at   | HSD11B2  | -0.01514 | 0.000101 | 0.001764 |
| 204137_at   | GPR137B  | -0.01745 | 6.75E-07 | 3.29E-05 |
| 204142_at   | ENOSF1   | -0.0177  | 2.81E-08 | 2.84E-06 |
| 204143_s_at | ENOSF1   | -0.01495 | 8.7E-07  | 4.05E-05 |
| 204153_s_at | MFNG     | 0.00726  | 0.002105 | 0.019777 |
| 204162_at   | NDC80    | 0.010454 | 0.001398 | 0.014296 |
| 204167_at   | BTD      | -0.01071 | 0.00631  | 0.045582 |
| 204168_at   | MGST2    | -0.00691 | 8E-05    | 0.001462 |
| 204174_at   | ALOX5AP  | 0.021296 | 1.74E-05 | 0.000418 |
| 204185_x_at | PPID     | -0.0079  | 0.000127 | 0.00211  |
| 204192_at   | CD37     | 0.010366 | 0.000309 | 0.004356 |
| 204198_s_at | RUNX3    | 0.0115   | 0.00208  | 0.019612 |
| 204200_s_at | PDGFB    | -0.00522 | 0.004904 | 0.037929 |
| 204205_at   | APOBEC3G | 0.02019  | 9.38E-06 | 0.000258 |
| 204220_at   | GMFG     | 0.02223  | 1.73E-06 | 6.79E-05 |

|             |              |          |          |          |
|-------------|--------------|----------|----------|----------|
| 204221_x_at | GLIPR1       | 0.006316 | 0.003166 | 0.027231 |
| 204222_s_at | GLIPR1       | 0.018042 | 7.16E-06 | 0.000206 |
| 204224_s_at | GCH1         | -0.02106 | 1.72E-08 | 2.02E-06 |
| 204231_s_at | FAAH         | -0.01017 | 0.002167 | 0.020199 |
| 204232_at   | FCER1G       | 0.026236 | 2.99E-07 | 1.72E-05 |
| 204236_at   | FLI1         | 0.012017 | 0.000664 | 0.007937 |
| 204242_s_at | ACOX3        | -0.01019 | 8.49E-05 | 0.001533 |
| 204254_s_at | VDR          | -0.00922 | 0.006702 | 0.047575 |
| 204255_s_at | VDR          | -0.01035 | 0.000793 | 0.009108 |
| 204259_at   | MMP7         | 0.028145 | 6.45E-08 | 5.34E-06 |
| 204264_at   | CPT2         | -0.00892 | 0.000337 | 0.004653 |
| 204265_s_at | GPSM3        | 0.007697 | 0.004021 | 0.032776 |
| 204268_at   | S100A2       | 0.012424 | 0.001787 | 0.017442 |
| 204269_at   | PIM2         | 0.008197 | 0.001112 | 0.01196  |
| 204271_s_at | EDNRB        | 0.010998 | 0.005695 | 0.042322 |
| 204279_at   | PSMB9        | 0.023104 | 6.00E-08 | 5.06E-06 |
| 204289_at   | LOC100506517 | -0.02354 | 3E-10    | 1.1E-07  |
| 204290_s_at | ALDH6A1      | -0.02555 | 3.12E-12 | 4.26E-09 |
| 204294_at   | AMT          | -0.01459 | 4.07E-07 | 2.15E-05 |
| 204295_at   | SURF1        | -0.00762 | 0.001788 | 0.017444 |
| 204300_at   | PET112L      | -0.01219 | 8.62E-05 | 0.001548 |
| 204304_s_at | PROM1        | 0.031289 | 9.87E-09 | 1.31E-06 |
| 204319_s_at | RGS10        | 0.017385 | 3.24E-07 | 1.8E-05  |
| 204326_x_at | MT1X         | -0.01259 | 0.000764 | 0.008855 |
| 204328_at   | TMC6         | 0.014081 | 3.91E-07 | 2.1E-05  |
| 204345_at   | COL16A1      | 0.009636 | 0.000397 | 0.005285 |
| 204347_at   | AK4          | -0.02222 | 1.34E-07 | 9.32E-06 |
| 204348_s_at | AK4          | -0.01595 | 3.17E-07 | 1.79E-05 |
| 204352_at   | TRAF5        | 0.010576 | 0.000468 | 0.005983 |
| 204359_at   | FLRT2        | 0.010647 | 0.006263 | 0.045415 |
| 204379_s_at | FGFR3        | -0.01132 | 0.004267 | 0.034167 |
| 204385_at   | KYNU         | -0.01789 | 1.57E-05 | 0.000387 |
| 204388_s_at | MAOA         | -0.02781 | 1.05E-09 | 2.46E-07 |
| 204389_at   | MAOA         | -0.02216 | 3.2E-07  | 1.79E-05 |
| 204415_at   | IFI6         | 0.011417 | 0.000157 | 0.002515 |
| 204429_s_at | SLC2A5       | -0.01206 | 0.000917 | 0.010223 |
| 204430_s_at | SLC2A5       | -0.0243  | 2.75E-08 | 2.82E-06 |
| 204436_at   | PLEKHO2      | 0.012696 | 1.72E-06 | 6.75E-05 |
| 204438_at   | MRC1         | 0.015512 | 0.000651 | 0.007824 |
| 204439_at   | IFI44L       | 0.014103 | 0.000422 | 0.005539 |
| 204446_s_at | ALOX5        | 0.011346 | 0.001878 | 0.018059 |
| 204447_at   | ProSAPiP1    | -0.01207 | 5.85E-05 | 0.001124 |
| 204456_s_at | GAS1         | 0.007391 | 0.000442 | 0.005739 |
| 204464_s_at | EDNRA        | 0.010721 | 0.006036 | 0.044287 |
| 204470_at   | CXCL1        | 0.016963 | 0.000839 | 0.009534 |
| 204476_s_at | PC           | -0.01481 | 9.8E-07  | 4.43E-05 |
| 204479_at   | OSTF1        | 0.008083 | 0.001642 | 0.016244 |
| 204488_at   | DOLK         | -0.00721 | 0.006227 | 0.045256 |
| 204489_s_at | CD44         | 0.024304 | 1.94E-05 | 0.000453 |



|             |          |          |          |          |
|-------------|----------|----------|----------|----------|
| 204490_s_at | CD44     | 0.021881 | 6.26E-06 | 0.000185 |
| 204501_at   | NOV      | 0.010519 | 1.06E-05 | 0.000281 |
| 204502_at   | SAMHD1   | 0.020422 | 2.6E-06  | 9.38E-05 |
| 204505_s_at | EPB49    | -0.00847 | 0.005589 | 0.041768 |
| 204510_at   | CDC7     | 0.014523 | 0.000256 | 0.003737 |
| 204517_at   | PPIC     | 0.007483 | 0.001901 | 0.01825  |
| 204528_s_at | NAP1L1   | 0.009193 | 1.54E-09 | 3.33E-07 |
| 204532_x_at | UGT1A1   | -0.01608 | 3.21E-05 | 0.00069  |
| 204533_at   | CXCL10   | 0.008825 | 0.005606 | 0.041863 |
| 204547_at   | RAB40B   | -0.00623 | 0.004043 | 0.032891 |
| 204563_at   | SELL     | 0.018091 | 1.49E-05 | 0.00037  |
| 204565_at   | ACOT13   | -0.01519 | 7.32E-08 | 5.81E-06 |
| 204579_at   | FGFR4    | -0.00589 | 0.006692 | 0.047539 |
| 204584_at   | L1CAM    | 0.00974  | 0.002094 | 0.019712 |
| 204588_s_at | SLC7A7   | -0.02627 | 7.03E-08 | 5.62E-06 |
| 204589_at   | NUAK1    | 0.014966 | 2.14E-05 | 0.000491 |
| 204594_s_at | SMCR7L   | -0.01055 | 9.49E-05 | 0.001672 |
| 204604_at   | CDK14    | -0.00951 | 0.000219 | 0.003296 |
| 204606_at   | CCL21    | 0.029298 | 1.55E-08 | 1.86E-06 |
| 204608_at   | ASL      | -0.01553 | 9.58E-05 | 0.001685 |
| 204615_x_at | IDI1     | -0.0061  | 0.00018  | 0.002812 |
| 204619_s_at | VCAN     | 0.015248 | 6.28E-05 | 0.001193 |
| 204620_s_at | VCAN     | 0.028693 | 2.88E-07 | 1.67E-05 |
| 204626_s_at | ITGB3    | 0.018611 | 0.00263  | 0.023495 |
| 204627_s_at | ITGB3    | 0.017784 | 0.000376 | 0.005081 |
| 204628_s_at | ITGB3    | 0.0113   | 0.006945 | 0.048835 |
| 204629_at   | PARVB    | -0.01037 | 0.000649 | 0.007799 |
| 204638_at   | ACP5     | -0.01763 | 7.63E-06 | 0.000217 |
| 204655_at   | CCL5     | 0.022971 | 2.48E-08 | 2.68E-06 |
| 204658_at   | TRA2A    | 0.009188 | 0.001873 | 0.018047 |
| 204661_at   | CD52     | 0.028109 | 1.22E-05 | 0.000312 |
| 204670_x_at | HLA-DRB1 | 0.013227 | 0.006277 | 0.045445 |
| 204680_s_at | RAPGEF5  | 0.007388 | 0.003032 | 0.026276 |
| 204683_at   | ICAM2    | 0.008854 | 0.001863 | 0.018004 |
| 204693_at   | CDC42EP1 | 0.009325 | 0.001278 | 0.013365 |
| 204694_at   | AFP      | -0.00611 | 0.000674 | 0.007996 |
| 204698_at   | ISG20    | 0.019359 | 4.51E-06 | 0.000144 |
| 204703_at   | IFT88    | -0.007   | 0.000108 | 0.001859 |
| 204704_s_at | ALDOB    | -0.03384 | 2.18E-08 | 2.39E-06 |
| 204705_x_at | ALDOB    | -0.02981 | 1.39E-08 | 1.72E-06 |
| 204720_s_at | DNAJC6   | -0.01019 | 0.005074 | 0.038833 |
| 204731_at   | TGFBR3   | -0.00948 | 0.001996 | 0.019007 |
| 204745_x_at | MT1G     | -0.01436 | 0.002853 | 0.025103 |
| 204774_at   | EVI2A    | 0.026789 | 8.81E-07 | 4.09E-05 |
| 204780_s_at | FAS      | 0.017316 | 4.47E-08 | 4.06E-06 |
| 204781_s_at | FAS      | 0.012419 | 1.51E-05 | 0.000375 |
| 204785_x_at | IFNAR2   | 0.01298  | 3.97E-07 | 2.12E-05 |
| 204786_s_at | IFNAR2   | 0.017212 | 7.89E-05 | 0.001446 |
| 204798_at   | MYB      | 0.014622 | 0.00019  | 0.002932 |

|             |           |          |          |          |
|-------------|-----------|----------|----------|----------|
| 204806_x_at | HLA-F     | 0.013722 | 4.01E-05 | 0.000819 |
| 204812_at   | ZW10      | -0.01125 | 0.000311 | 0.004382 |
| 204817_at   | ESPL1     | -0.01386 | 9.21E-05 | 0.001629 |
| 204820_s_at | BTN3A2    | 0.013266 | 0.000311 | 0.004382 |
| 204824_at   | ENDOG     | -0.01071 | 2.44E-05 | 0.000545 |
| 204829_s_at | FOLR2     | 0.018894 | 1.51E-06 | 6.1E-05  |
| 204834_at   | FGL2      | 0.021072 | 5.42E-09 | 8.33E-07 |
| 204836_at   | GLDC      | -0.01697 | 4.29E-07 | 2.23E-05 |
| 204844_at   | ENPEP     | -0.01733 | 8.28E-05 | 0.001505 |
| 204845_s_at | ENPEP     | -0.01705 | 0.001055 | 0.01145  |
| 204846_at   | CP        | 0.022372 | 1.85E-05 | 0.000437 |
| 204868_at   | ICT1      | -0.00627 | 0.000513 | 0.006471 |
| 204872_at   | TLE4      | 0.009366 | 0.003744 | 0.030999 |
| 204882_at   | ARHGAP25  | 0.019677 | 7.84E-07 | 3.72E-05 |
| 204885_s_at | MSLN      | 0.008576 | 0.000326 | 0.00454  |
| 204890_s_at | LCK       | 0.011923 | 0.000147 | 0.002384 |
| 204912_at   | IL10RA    | 0.013041 | 0.000222 | 0.003328 |
| 204922_at   | C11orf80  | 0.007192 | 0.00452  | 0.035651 |
| 204923_at   | SASH3     | 0.019245 | 7.5E-06  | 0.000214 |
| 204924_at   | TLR2      | 0.011486 | 0.001293 | 0.013493 |
| 204925_at   | CTNS      | -0.00855 | 0.006151 | 0.044941 |
| 204931_at   | TCF21     | 0.011638 | 0.001321 | 0.013722 |
| 204932_at   | TNFRSF11B | 0.014409 | 7.37E-07 | 3.53E-05 |
| 204934_s_at | HPN       | -0.01477 | 0.000283 | 0.004071 |
| 204951_at   | RHOH      | 0.019292 | 1.16E-05 | 0.000302 |
| 204955_at   | SRPX      | 0.008521 | 0.00046  | 0.005908 |
| 204959_at   | MNDA      | 0.022613 | 9.63E-06 | 0.000262 |
| 204960_at   | PTPRCAP   | 0.00839  | 0.003362 | 0.02862  |
| 204961_s_at | NCF1      | 0.008242 | 0.002587 | 0.023233 |
| 204963_at   | SSPN      | 0.009546 | 0.004009 | 0.032706 |
| 204964_s_at | SSPN      | 0.009178 | 0.000106 | 0.001823 |
| 204969_s_at | RDX       | -0.01171 | 0.001716 | 0.016863 |
| 204970_s_at | MAFG      | -0.00725 | 0.000988 | 0.010867 |
| 204971_at   | CSTA      | 0.021014 | 1.15E-05 | 0.000299 |
| 204972_at   | OAS2      | 0.013951 | 2.84E-06 | 0.0001   |
| 204975_at   | EMP2      | 0.008763 | 0.006581 | 0.046961 |
| 204977_at   | DDX10     | -0.01325 | 0.00033  | 0.004581 |
| 204979_s_at | SH3BGR    | -0.01098 | 0.000242 | 0.003576 |
| 204981_at   | SLC22A18  | -0.0129  | 0.002391 | 0.021791 |
| 204982_at   | GIT2      | 0.010268 | 0.002147 | 0.020072 |
| 204989_s_at | ITGB4     | 0.009261 | 0.002332 | 0.021454 |
| 204994_at   | MX2       | 0.010835 | 0.000246 | 0.00362  |
| 204997_at   | GPD1      | -0.01423 | 0.004515 | 0.035637 |
| 205012_s_at | HAGH      | -0.018   | 1.74E-08 | 2.02E-06 |
| 205038_at   | IKZF1     | 0.0074   | 0.006363 | 0.045801 |
| 205039_s_at | IKZF1     | 0.016324 | 1.09E-05 | 0.000287 |
| 205044_at   | GABRP     | 0.017116 | 1.39E-06 | 5.72E-05 |
| 205045_at   | AKAP10    | -0.00644 | 0.000262 | 0.003817 |
| 205052_at   | AUH       | -0.0155  | 2.16E-09 | 4.26E-07 |

|             |          |          |          |          |
|-------------|----------|----------|----------|----------|
| 205065_at   | ENPP1    | -0.01196 | 0.001505 | 0.015138 |
| 205073_at   | CYP2J2   | -0.0147  | 0.00027  | 0.003904 |
| 205074_at   | SLC22A5  | -0.01669 | 1.04E-06 | 4.62E-05 |
| 205075_at   | SERPINF2 | -0.01421 | 2.67E-06 | 9.57E-05 |
| 205079_s_at | MPDZ     | -0.01108 | 0.001536 | 0.015393 |
| 205081_at   | CRIP1    | 0.029182 | 3.38E-11 | 2.15E-08 |
| 205082_s_at | AOX1     | -0.01605 | 0.000521 | 0.006536 |
| 205083_at   | AOX1     | -0.02046 | 5.12E-05 | 0.001009 |
| 205108_s_at | APOB     | -0.00658 | 0.00691  | 0.048636 |
| 205110_s_at | FGF13    | 0.009237 | 0.002658 | 0.023709 |
| 205133_s_at | HSPE1    | -0.00575 | 0.002772 | 0.024544 |
| 205137_x_at | USH1C    | -0.01029 | 0.004521 | 0.035651 |
| 205141_at   | ANG      | -0.01147 | 0.003539 | 0.029743 |
| 205147_x_at | NCF4     | 0.008531 | 0.006708 | 0.047607 |
| 205149_s_at | CLCN4    | -0.00694 | 0.001139 | 0.012167 |
| 205153_s_at | CD40     | 0.005724 | 0.00146  | 0.014766 |
| 205157_s_at | KRT17    | 0.006095 | 0.006467 | 0.046341 |
| 205158_at   | RNASE4   | -0.01063 | 0.003833 | 0.031594 |
| 205159_at   | CSF2RB   | 0.019842 | 6.17E-06 | 0.000184 |
| 205164_at   | GCAT     | -0.01198 | 9.86E-05 | 0.001726 |
| 205166_at   | CAPN5    | -0.01    | 0.004402 | 0.034958 |
| 205174_s_at | QPCT     | 0.014376 | 0.000505 | 0.006387 |
| 205175_s_at | KHK      | -0.01733 | 4.31E-06 | 0.00014  |
| 205194_at   | PSPH     | -0.01114 | 0.000387 | 0.005183 |
| 205201_at   | GLI3     | -0.00835 | 0.001478 | 0.014904 |
| 205203_at   | PLD1     | -0.01434 | 4.36E-05 | 0.000879 |
| 205208_at   | ALDH1L1  | -0.02406 | 9.54E-10 | 2.26E-07 |
| 205213_at   | ACAP1    | 0.007789 | 0.002063 | 0.019493 |
| 205214_at   | STK17B   | 0.01877  | 2.23E-07 | 1.37E-05 |
| 205216_s_at | APOH     | -0.03156 | 1.26E-07 | 8.86E-06 |
| 205219_s_at | GALK2    | -0.00879 | 0.002365 | 0.021609 |
| 205221_at   | HGD      | -0.01712 | 1.54E-08 | 1.86E-06 |
| 205222_at   | EHHADH   | -0.01726 | 1.49E-07 | 9.88E-06 |
| 205229_s_at | COCH     | -0.01217 | 0.003911 | 0.032067 |
| 205231_s_at | EPM2A    | -0.01012 | 0.000592 | 0.007227 |
| 205234_at   | SLC16A4  | -0.01024 | 0.000223 | 0.003339 |
| 205242_at   | CXCL13   | 0.011114 | 0.00177  | 0.017327 |
| 205243_at   | SLC13A3  | -0.03873 | 6.57E-11 | 3.85E-08 |
| 205244_s_at | SLC13A3  | -0.03649 | 1.26E-10 | 6.25E-08 |
| 205246_at   | PEX13    | -0.00978 | 0.001343 | 0.013863 |
| 205267_at   | POU2AF1  | 0.028748 | 1.09E-05 | 0.000287 |
| 205269_at   | LCP2     | 0.013867 | 0.000394 | 0.005255 |
| 205270_s_at | LCP2     | 0.016418 | 0.000432 | 0.005644 |
| 205278_at   | GAD1     | -0.01403 | 0.000181 | 0.002818 |
| 205285_s_at | FYB      | 0.018475 | 9.3E-05  | 0.001643 |
| 205291_at   | IL2RB    | 0.013759 | 1.75E-06 | 6.81E-05 |
| 205298_s_at | BTN2A2   | 0.008437 | 0.002295 | 0.021162 |
| 205301_s_at | OGG1     | -0.00828 | 0.001781 | 0.017428 |
| 205303_at   | KCNJ8    | 0.016326 | 0.000214 | 0.003228 |

|             |          |          |          |          |
|-------------|----------|----------|----------|----------|
| 205304_s_at | KCNJ8    | 0.020049 | 1.36E-05 | 0.000343 |
| 205306_x_at | KMO      | -0.03062 | 2.03E-08 | 2.27E-06 |
| 205307_s_at | KMO      | -0.03263 | 1.66E-10 | 6.99E-08 |
| 205311_at   | DDC      | -0.02949 | 3.43E-09 | 5.97E-07 |
| 205322_s_at | MTF1     | 0.007229 | 0.000452 | 0.005842 |
| 205328_at   | CLDN10   | -0.01041 | 0.000179 | 0.0028   |
| 205329_s_at | SNX4     | -0.00699 | 2.49E-06 | 9.02E-05 |
| 205336_at   | PVALB    | -0.0164  | 0.000943 | 0.010463 |
| 205341_at   | EHD2     | 0.008729 | 0.001354 | 0.013936 |
| 205342_s_at | SULT1C2  | -0.01072 | 0.00205  | 0.0194   |
| 205343_at   | SULT1C2  | -0.01376 | 2.29E-09 | 4.4E-07  |
| 205350_at   | CRABP1   | -0.0137  | 0.000104 | 0.001805 |
| 205352_at   | SERPINI1 | -0.01335 | 0.000885 | 0.009942 |
| 205353_s_at | PEBP1    | -0.00914 | 2.89E-05 | 0.000631 |
| 205355_at   | ACADSB   | -0.02065 | 6E-10    | 1.63E-07 |
| 205363_at   | BBOX1    | -0.00994 | 0.003924 | 0.032148 |
| 205364_at   | ACOX2    | -0.0299  | 1.88E-09 | 3.87E-07 |
| 205369_x_at | DBT      | -0.01187 | 9.56E-05 | 0.001683 |
| 205380_at   | PDZK1    | -0.01398 | 7.73E-10 | 1.91E-07 |
| 205382_s_at | CFD      | 0.008915 | 0.006696 | 0.047553 |
| 205392_s_at | CCL14    | 0.013303 | 0.001194 | 0.012632 |
| 205395_s_at | MRE11A   | 0.007759 | 0.002859 | 0.025113 |
| 205412_at   | ACAT1    | -0.01602 | 1.6E-07  | 1.04E-05 |
| 205419_at   | GPR183   | 0.01662  | 0.00083  | 0.009446 |
| 205430_at   | BMP5     | 0.010115 | 0.004067 | 0.033028 |
| 205440_s_at | NPY1R    | 0.013883 | 0.001364 | 0.014027 |
| 205441_at   | OCEL1    | -0.00899 | 0.003472 | 0.029298 |
| 205442_at   | MFAP3L   | -0.01356 | 1.13E-06 | 4.92E-05 |
| 205448_s_at | MAP3K12  | -0.01222 | 5.45E-06 | 0.000166 |
| 205456_at   | CD3E     | 0.008595 | 0.005484 | 0.041205 |
| 205464_at   | SCNN1B   | -0.00833 | 0.000202 | 0.003081 |
| 205478_at   | PPP1R1A  | -0.01192 | 0.001981 | 0.018919 |
| 205483_s_at | ISG15    | 0.007201 | 0.005859 | 0.04339  |
| 205484_at   | SIT1     | 0.008043 | 0.006279 | 0.045445 |
| 205488_at   | GZMA     | 0.027675 | 1.44E-07 | 9.64E-06 |
| 205489_at   | CRYM     | -0.01728 | 4.76E-09 | 7.64E-07 |
| 205498_at   | GHR      | -0.01633 | 8.04E-06 | 0.000225 |
| 205499_at   | SRPX2    | 0.010334 | 0.00207  | 0.019539 |
| 205501_at   | PDE10A   | -0.0171  | 5.68E-05 | 0.001099 |
| 205502_at   | CYP17A1  | -0.02074 | 4.58E-05 | 0.000916 |
| 205504_at   | BTK      | 0.009394 | 0.000619 | 0.007498 |
| 205505_at   | GCNT1    | 0.008233 | 0.002878 | 0.025242 |
| 205506_at   | VIL1     | -0.01336 | 0.000519 | 0.006529 |
| 205507_at   | ARHGEF15 | 0.006066 | 0.006973 | 0.049018 |
| 205512_s_at | AIFM1    | -0.01477 | 3.92E-05 | 0.000806 |
| 205528_s_at | RUNX1T1  | 0.014617 | 0.000166 | 0.002647 |
| 205530_at   | ETFDH    | -0.01786 | 1.08E-10 | 5.74E-08 |
| 205543_at   | HSPA4L   | -0.00792 | 0.000672 | 0.007992 |
| 205557_at   | BPI      | -0.01537 | 0.000386 | 0.00517  |

|             |         |          |          |          |
|-------------|---------|----------|----------|----------|
| 205569_at   | LAMP3   | 0.011034 | 0.001786 | 0.017442 |
| 205572_at   | ANGPT2  | 0.010311 | 0.004634 | 0.036274 |
| 205582_s_at | GGT5    | 0.008325 | 0.000583 | 0.007125 |
| 205587_at   | FGFR1OP | -0.00758 | 0.000963 | 0.010643 |
| 205588_s_at | FGFR1OP | -0.00704 | 0.001147 | 0.012231 |
| 205592_at   | SLC4A1  | -0.02244 | 2.83E-06 | 0.0001   |
| 205614_x_at | MST1    | -0.01202 | 0.000458 | 0.005891 |
| 205617_at   | PRRG2   | -0.00612 | 0.004627 | 0.036239 |
| 205624_at   | CPA3    | 0.034049 | 2.27E-08 | 2.47E-06 |
| 205625_s_at | CALB1   | -0.01911 | 0.000132 | 0.002188 |
| 205626_s_at | CALB1   | -0.01446 | 0.000154 | 0.002478 |
| 205633_s_at | ALAS1   | -0.00997 | 0.002953 | 0.02577  |
| 205640_at   | ALDH3B1 | -0.00966 | 0.006325 | 0.045669 |
| 205642_at   | CEP110  | 0.00877  | 0.000417 | 0.005491 |
| 205653_at   | CTSG    | 0.029578 | 4.73E-13 | 1.51E-09 |
| 205659_at   | HDAC9   | 0.009676 | 0.003205 | 0.027457 |
| 205665_at   | TSPAN9  | -0.0065  | 0.003596 | 0.030113 |
| 205666_at   | FMO1    | -0.01673 | 3.14E-05 | 0.000677 |
| 205668_at   | LY75    | 0.012522 | 0.000147 | 0.002384 |
| 205671_s_at | HLA-DOB | 0.011392 | 0.000303 | 0.004299 |
| 205673_s_at | ASB9    | -0.01931 | 1.7E-07  | 1.09E-05 |
| 205675_at   | MTTP    | -0.03136 | 7.79E-08 | 6.06E-06 |
| 205676_at   | CYP27B1 | -0.02773 | 2.23E-05 | 0.000505 |
| 205681_at   | BCL2A1  | 0.01481  | 0.000277 | 0.003995 |
| 205682_x_at | APOM    | -0.02447 | 4.17E-05 | 0.000847 |
| 205683_x_at | TPSAB1  | 0.018035 | 8.34E-06 | 0.000232 |
| 205686_s_at | CD86    | 0.013719 | 3.44E-05 | 0.000726 |
| 205689_at   | PCNXL2  | 0.006151 | 0.005946 | 0.043847 |
| 205694_at   | TYRP1   | -0.01571 | 0.001317 | 0.013689 |
| 205696_s_at | GFRA1   | 0.017132 | 4.7E-06  | 0.000148 |
| 205710_at   | LRP2    | -0.01558 | 3.99E-05 | 0.000817 |
| 205711_x_at | ATP5C1  | -0.0066  | 0.000528 | 0.006616 |
| 205712_at   | PTPRD   | -0.01589 | 2.39E-05 | 0.000536 |
| 205713_s_at | COMP    | 0.014312 | 1.88E-05 | 0.000442 |
| 205715_at   | BST1    | -0.00726 | 0.006978 | 0.049027 |
| 205719_s_at | PAH     | -0.0207  | 6.83E-06 | 0.000199 |
| 205728_at   | ODZ1    | -0.00817 | 0.003597 | 0.030113 |
| 205730_s_at | ABLIM3  | -0.01483 | 0.00084  | 0.009534 |
| 205733_at   | BLM     | 0.00664  | 0.005637 | 0.042027 |
| 205738_s_at | FABP3   | -0.00846 | 0.005664 | 0.042172 |
| 205750_at   | BPHL    | -0.02211 | 3.28E-11 | 2.15E-08 |
| 205751_at   | SH3GL2  | -0.01575 | 6.35E-05 | 0.001202 |
| 205752_s_at | GSTM5   | 0.010967 | 0.001194 | 0.012632 |
| 205757_at   | ENTPD5  | -0.02409 | 3.32E-10 | 1.18E-07 |
| 205758_at   | CD8A    | 0.010593 | 0.000515 | 0.006492 |
| 205760_s_at | OGG1    | -0.01617 | 9.93E-08 | 7.25E-06 |
| 205761_s_at | DUS4L   | -0.01191 | 0.000817 | 0.009342 |
| 205768_s_at | SLC27A2 | -0.01852 | 3.56E-05 | 0.000742 |
| 205769_at   | SLC27A2 | -0.01735 | 0.000116 | 0.001971 |

|             |          |          |          |          |
|-------------|----------|----------|----------|----------|
| 205774_at   | F12      | 0.007813 | 0.005338 | 0.040475 |
| 205776_at   | FMO5     | -0.01936 | 1.62E-05 | 0.000396 |
| 205777_at   | DUSP9    | -0.01124 | 0.006443 | 0.046211 |
| 205782_at   | FGF7     | 0.013461 | 0.003889 | 0.031911 |
| 205786_s_at | ITGAM    | 0.022818 | 1.65E-07 | 1.06E-05 |
| 205789_at   | CD1D     | 0.009627 | 0.001941 | 0.018598 |
| 205798_at   | IL7R     | 0.028169 | 3.24E-08 | 3.12E-06 |
| 205799_s_at | SLC3A1   | -0.00777 | 0.000754 | 0.008763 |
| 205824_at   | HSPB2    | 0.006146 | 0.001867 | 0.018027 |
| 205826_at   | MYOM2    | -0.01425 | 0.000171 | 0.002704 |
| 205831_at   | CD2      | 0.009989 | 0.001035 | 0.011275 |
| 205843_x_at | CRAT     | -0.00813 | 0.002578 | 0.023206 |
| 205844_at   | VNN1     | -0.02222 | 2.63E-05 | 0.000581 |
| 205850_s_at | GABRB3   | -0.01046 | 0.000515 | 0.006492 |
| 205859_at   | LY86     | 0.01336  | 3.22E-05 | 0.000692 |
| 205860_x_at | FOLH1    | -0.02936 | 1.82E-07 | 1.14E-05 |
| 205882_x_at | ADD3     | -0.00916 | 5.71E-05 | 0.001103 |
| 205887_x_at | MSH3     | -0.00578 | 0.002842 | 0.025017 |
| 205890_s_at | GABBR1   | 0.014547 | 4.69E-05 | 0.000936 |
| 205892_s_at | FABP1    | -0.03819 | 1.4E-07  | 9.56E-06 |
| 205896_at   | SLC22A4  | -0.02144 | 1.23E-07 | 8.71E-06 |
| 205898_at   | CX3CR1   | 0.011981 | 0.000315 | 0.004432 |
| 205907_s_at | OMD      | 0.008773 | 0.002032 | 0.019266 |
| 205910_s_at | CEL      | -0.01355 | 0.006386 | 0.04589  |
| 205911_at   | PTH1R    | -0.01443 | 2.99E-06 | 0.000105 |
| 205922_at   | VNN2     | 0.00881  | 0.000809 | 0.009262 |
| 205931_s_at | CREB5    | 0.011574 | 9.81E-05 | 0.00172  |
| 205934_at   | PLCL1    | -0.01167 | 0.000142 | 0.002327 |
| 205939_at   | CYP3A7   | -0.02472 | 3.48E-07 | 1.91E-05 |
| 205942_s_at | ACSM3    | -0.01568 | 4.7E-06  | 0.000148 |
| 205945_at   | IL6R     | -0.00836 | 0.00645  | 0.046249 |
| 205963_s_at | DNAJA3   | -0.01021 | 0.000114 | 0.001943 |
| 205978_at   | KL       | -0.02697 | 4.64E-09 | 7.56E-07 |
| 205983_at   | DPEP1    | -0.0249  | 8.88E-09 | 1.23E-06 |
| 205987_at   | CD1C     | 0.024967 | 1.28E-06 | 5.37E-05 |
| 205988_at   | CD84     | 0.011163 | 1.93E-05 | 0.000453 |
| 205991_s_at | PRRX1    | 0.013984 | 7.9E-05  | 0.001447 |
| 205996_s_at | AK2      | -0.01058 | 3.69E-05 | 0.000764 |
| 205999_x_at | CYP3A4   | -0.01254 | 0.000336 | 0.004642 |
| 206011_at   | CASP1    | 0.018841 | 5.63E-06 | 0.000171 |
| 206022_at   | NDP      | 0.00803  | 0.002664 | 0.023728 |
| 206024_at   | HPD      | -0.03945 | 3.1E-07  | 1.76E-05 |
| 206030_at   | ASPA     | -0.0268  | 1.3E-11  | 1.16E-08 |
| 206034_at   | SERPINB8 | 0.012024 | 0.000766 | 0.008866 |
| 206054_at   | KNG1     | -0.0163  | 0.000219 | 0.003297 |
| 206065_s_at | DPYS     | -0.02394 | 2.93E-07 | 1.69E-05 |
| 206068_s_at | ACADL    | -0.01219 | 6.66E-05 | 0.001252 |
| 206069_s_at | ACADL    | -0.02026 | 5.76E-08 | 4.88E-06 |
| 206085_s_at | CTH      | -0.01067 | 0.000161 | 0.002577 |

|             |          |          |          |          |
|-------------|----------|----------|----------|----------|
| 206089_at   | NELL1    | -0.01736 | 2.11E-05 | 0.000486 |
| 206094_x_at | UGT1A1   | -0.01701 | 1.33E-05 | 0.000335 |
| 206095_s_at | SRSF10   | -0.00672 | 0.006262 | 0.045415 |
| 206099_at   | PRKCH    | 0.013155 | 0.000327 | 0.004548 |
| 206116_s_at | TPM1     | 0.010251 | 3.28E-05 | 0.0007   |
| 206117_at   | TPM1     | 0.010421 | 0.000868 | 0.009782 |
| 206118_at   | STAT4    | 0.014019 | 0.000178 | 0.002792 |
| 206119_at   | BHMT     | -0.02403 | 6.22E-08 | 5.21E-06 |
| 206129_s_at | ARSB     | -0.01632 | 0.000114 | 0.001949 |
| 206133_at   | XAF1     | 0.012226 | 0.000144 | 0.002347 |
| 206134_at   | ADAMDEC1 | 0.009747 | 0.005588 | 0.041768 |
| 206149_at   | CHP2     | -0.01168 | 0.000304 | 0.004305 |
| 206155_at   | ABCC2    | -0.02586 | 4.17E-07 | 2.19E-05 |
| 206197_at   | NME5     | -0.00707 | 0.001351 | 0.013923 |
| 206214_at   | PLA2G7   | 0.01562  | 0.000103 | 0.001786 |
| 206217_at   | EDA      | -0.00699 | 0.001994 | 0.019003 |
| 206219_s_at | VAV1     | 0.009564 | 0.001398 | 0.014296 |
| 206226_at   | HRG      | -0.0165  | 0.000221 | 0.003314 |
| 206235_at   | LIG4     | -0.00737 | 0.006384 | 0.04589  |
| 206239_s_at | SPINK1   | -0.02109 | 0.001135 | 0.012159 |
| 206242_at   | TM4SF5   | -0.01055 | 0.000125 | 0.002093 |
| 206247_at   | MICB     | 0.008425 | 0.00496  | 0.038223 |
| 206249_at   | MAP3K13  | -0.00972 | 0.002588 | 0.023233 |
| 206254_at   | EGF      | -0.04162 | 1.18E-13 | 6.59E-10 |
| 206259_at   | PROC     | -0.01875 | 1.82E-06 | 6.96E-05 |
| 206263_at   | FMO4     | -0.01578 | 5.21E-06 | 0.000161 |
| 206294_at   | HSD3B2   | -0.00793 | 0.000821 | 0.00937  |
| 206296_x_at | MAP4K1   | 0.016357 | 1.51E-06 | 6.1E-05  |
| 206313_at   | HLA-DOA  | 0.010477 | 0.000166 | 0.002639 |
| 206325_at   | SERPINA6 | -0.02665 | 4.48E-07 | 2.32E-05 |
| 206332_s_at | IFI16    | 0.023229 | 3.46E-10 | 1.18E-07 |
| 206336_at   | CXCL6    | 0.015065 | 0.002839 | 0.025004 |
| 206337_at   | CCR7     | 0.009497 | 0.004919 | 0.037994 |
| 206346_at   | PRLR     | -0.02619 | 2.73E-10 | 1.04E-07 |
| 206348_s_at | PDK3     | -0.01277 | 0.000457 | 0.005887 |
| 206350_at   | APCS     | 0.006666 | 0.006004 | 0.044158 |
| 206363_at   | MAF      | -0.02008 | 2.06E-07 | 1.28E-05 |
| 206366_x_at | XCL1     | 0.014313 | 1.32E-05 | 0.000335 |
| 206369_s_at | PIK3CG   | 0.009848 | 0.001546 | 0.015459 |
| 206385_s_at | ANK3     | -0.00782 | 2.18E-05 | 0.000498 |
| 206391_at   | RARRES1  | 0.012213 | 0.00478  | 0.037169 |
| 206396_at   | SLC1A1   | -0.01319 | 0.00059  | 0.00721  |
| 206401_s_at | MAPT     | -0.0184  | 1.02E-05 | 0.000273 |
| 206420_at   | IGSF6    | 0.019633 | 2.47E-05 | 0.000551 |
| 206431_x_at | TBC1D9B  | -0.00571 | 0.003929 | 0.032176 |
| 206457_s_at | DIO1     | -0.03354 | 2.52E-08 | 2.68E-06 |
| 206461_x_at | MT1H     | -0.01334 | 0.000381 | 0.005123 |
| 206469_x_at | AKR7A3   | -0.02665 | 3.2E-09  | 5.69E-07 |
| 206483_at   | LRRC6    | -0.00656 | 0.002507 | 0.022709 |

|             |           |          |          |          |
|-------------|-----------|----------|----------|----------|
| 206484_s_at | XPNPEP2   | -0.03971 | 3.92E-10 | 1.28E-07 |
| 206485_at   | CD5       | 0.004865 | 0.001873 | 0.018047 |
| 206492_at   | FHIT      | -0.01788 | 1.96E-08 | 2.2E-06  |
| 206496_at   | FMO3      | 0.01041  | 0.004621 | 0.03622  |
| 206499_s_at | RCC1      | 0.006185 | 0.006259 | 0.045415 |
| 206500_s_at | C14orf106 | 0.01917  | 4.28E-08 | 3.97E-06 |
| 206513_at   | AIM2      | 0.016129 | 0.000179 | 0.002797 |
| 206514_s_at | CYP4F2    | -0.03037 | 5.2E-08  | 4.57E-06 |
| 206515_at   | CYP4F3    | -0.02581 | 3.2E-07  | 1.79E-05 |
| 206519_x_at | SIGLEC6   | 0.006725 | 0.003746 | 0.031001 |
| 206522_at   | MGAM      | -0.02436 | 5.63E-08 | 4.84E-06 |
| 206527_at   | ABAT      | -0.02588 | 1.61E-07 | 1.04E-05 |
| 206535_at   | SLC2A2    | -0.02382 | 7.92E-06 | 0.000223 |
| 206539_s_at | CYP4F12   | -0.0058  | 0.003438 | 0.029128 |
| 206541_at   | KLKB1     | -0.01099 | 3.03E-05 | 0.000659 |
| 206542_s_at | SMARCA2   | 0.005891 | 0.000887 | 0.009956 |
| 206545_at   | CD28      | 0.015439 | 7.37E-07 | 3.53E-05 |
| 206580_s_at | EFEMP2    | 0.010373 | 9.18E-05 | 0.001628 |
| 206584_at   | LY96      | 0.025975 | 9.02E-07 | 4.16E-05 |
| 206599_at   | SLC16A5   | 0.00597  | 0.004476 | 0.035413 |
| 206600_s_at | SLC16A5   | 0.014208 | 7.13E-06 | 0.000206 |
| 206610_s_at | F11       | -0.02253 | 1.49E-10 | 6.52E-08 |
| 206628_at   | SLC5A1    | -0.01893 | 0.000542 | 0.00674  |
| 206659_at   |           | 0.008815 | 0.004316 | 0.03445  |
| 206662_at   | GLRX      | -0.01093 | 1.8E-05  | 0.000428 |
| 206666_at   | GZMK      | 0.016879 | 9.08E-05 | 0.001613 |
| 206682_at   | CLEC10A   | 0.007746 | 0.004308 | 0.034424 |
| 206687_s_at | PTPN6     | 0.009318 | 0.000261 | 0.003792 |
| 206693_at   | IL7       | 0.007843 | 0.005913 | 0.043688 |
| 206695_x_at | ZNF43     | 0.006862 | 0.002338 | 0.021479 |
| 206704_at   | CLCN5     | -0.0132  | 1.05E-06 | 4.66E-05 |
| 206707_x_at | FAM65B    | 0.009632 | 0.001426 | 0.014488 |
| 206710_s_at | EPB41L3   | -0.01582 | 6.55E-07 | 3.23E-05 |
| 206715_at   | TFEC      | -0.01515 | 0.000503 | 0.006363 |
| 206716_at   | UMOD      | -0.03449 | 2.28E-05 | 0.000516 |
| 206726_at   | HPGDS     | 0.023107 | 1.56E-07 | 1.03E-05 |
| 206742_at   | FIGF      | 0.011183 | 0.004175 | 0.033664 |
| 206746_at   | BFSP1     | 0.01069  | 0.00023  | 0.003419 |
| 206748_s_at | SPAG9     | -0.01059 | 0.000335 | 0.004639 |
| 206754_s_at | CYP2B6    | -0.02191 | 8.19E-05 | 0.001491 |
| 206755_at   | CYP2B6    | -0.02096 | 0.000398 | 0.005301 |
| 206756_at   | CHST7     | 0.010564 | 4.73E-05 | 0.000942 |
| 206767_at   | RBMS3     | 0.011903 | 0.000533 | 0.006656 |
| 206770_s_at | SLC35A3   | -0.00758 | 0.005495 | 0.041238 |
| 206775_at   | CUBN      | -0.02975 | 5.49E-07 | 2.76E-05 |
| 206788_s_at | CBFB      | 0.007848 | 0.00017  | 0.002698 |
| 206804_at   | CD3G      | 0.01552  | 1.82E-05 | 0.000431 |
| 206809_s_at | HNRNPA3   | 0.004484 | 0.000621 | 0.00751  |
| 206818_s_at | CNNM2     | -0.01178 | 0.000357 | 0.004865 |



|             |            |          |          |          |
|-------------|------------|----------|----------|----------|
| 206840_at   | AFM        | -0.03353 | 1.45E-07 | 9.68E-06 |
| 206846_s_at | HDAC6      | -0.01924 | 1.91E-07 | 1.19E-05 |
| 206870_at   | PPARA      | -0.01499 | 0.000235 | 0.003497 |
| 206872_at   | SLC17A1    | -0.01764 | 0.000561 | 0.006915 |
| 206878_at   | DAO        | -0.03403 | 1.25E-09 | 2.85E-07 |
| 206910_x_at | CFHR2      | 0.009146 | 8.64E-05 | 0.00155  |
| 206925_at   | ST8SIA4    | 0.01476  | 3.8E-06  | 0.000127 |
| 206930_at   | GLYAT      | -0.02023 | 2.39E-06 | 8.76E-05 |
| 206950_at   | SCN9A      | -0.01132 | 0.002794 | 0.024673 |
| 206952_at   | G6PC       | -0.02786 | 6.08E-06 | 0.000182 |
| 206955_at   | AQP7       | -0.01849 | 1.48E-05 | 0.000369 |
| 206957_at   | AGXT       | -0.0202  | 3.47E-05 | 0.000729 |
| 206963_s_at | NAT8       | -0.0222  | 0.000113 | 0.001923 |
| 206964_at   | NAT8B      | -0.01895 | 3.09E-05 | 0.000668 |
| 206974_at   | CXCR6      | 0.010958 | 0.000269 | 0.003904 |
| 206978_at   | CCR2       | 0.017492 | 3.56E-06 | 0.000121 |
| 206983_at   | CCR6       | 0.015539 | 2.28E-07 | 1.39E-05 |
| 206991_s_at | CCR5       | 0.015307 | 8.51E-06 | 0.000236 |
| 207007_at   | NR1I3      | -0.01937 | 1.76E-06 | 6.81E-05 |
| 207016_s_at | ALDH1A2    | 0.013148 | 0.002494 | 0.022612 |
| 207017_at   | RAB27B     | 0.01274  | 9.76E-07 | 4.43E-05 |
| 207018_s_at | RAB27B     | 0.013699 | 7.36E-06 | 0.000211 |
| 207040_s_at | ST13       | -0.00638 | 0.001035 | 0.011275 |
| 207044_at   | THR3       | -0.01193 | 6.52E-07 | 3.22E-05 |
| 207047_s_at | CLCNKA     | -0.0137  | 0.000794 | 0.009108 |
| 207049_at   | SCN8A      | -0.0139  | 9.76E-06 | 0.000264 |
| 207050_at   | CACNA2D1   | -0.00908 | 0.000107 | 0.001846 |
| 207051_at   | SLC17A4    | -0.01152 | 0.006984 | 0.049047 |
| 207052_at   | HAVCR1     | 0.021991 | 0.000761 | 0.00883  |
| 207057_at   | SLC16A7    | -0.01095 | 0.003537 | 0.029743 |
| 207063_at   | NCRNA00185 | -0.01214 | 0.000173 | 0.002734 |
| 207071_s_at | ACO1       | -0.01888 | 1.03E-08 | 1.35E-06 |
| 207076_s_at | ASS1       | -0.02303 | 2.45E-07 | 1.46E-05 |
| 207081_s_at | PI4KA      | -0.01287 | 0.000101 | 0.001757 |
| 207095_at   | SLC10A2    | -0.01642 | 0.001811 | 0.017628 |
| 207105_s_at | PIK3R2     | -0.00685 | 0.002013 | 0.019121 |
| 207124_s_at | GNB5       | -0.01108 | 3.65E-06 | 0.000123 |
| 207126_x_at | UGT1A1     | -0.01595 | 1.72E-05 | 0.000414 |
| 207131_x_at | GGT1       | -0.01185 | 0.000418 | 0.005491 |
| 207134_x_at | TPSB2      | 0.018385 | 6.78E-07 | 3.3E-05  |
| 207141_s_at | KCNJ3      | -0.01684 | 1.29E-06 | 5.4E-05  |
| 207142_at   | KCNJ3      | -0.01672 | 1.31E-06 | 5.47E-05 |
| 207184_at   | SLC6A13    | -0.01549 | 8.92E-07 | 4.13E-05 |
| 207191_s_at | ISLR       | 0.009022 | 0.00652  | 0.04664  |
| 207211_at   | USP2       | -0.02499 | 4.15E-07 | 2.18E-05 |
| 207212_at   | SLC9A3     | -0.01213 | 1.6E-05  | 0.000392 |
| 207213_s_at | USP2       | -0.03776 | 6.18E-09 | 9.06E-07 |
| 207237_at   | KCNA3      | 0.010366 | 0.000529 | 0.006622 |
| 207238_s_at | PTPRC      | 0.026694 | 1.49E-06 | 6.03E-05 |

|             |          |          |          |          |
|-------------|----------|----------|----------|----------|
| 207243_s_at | CALM2    | 0.004723 | 5.52E-05 | 0.001077 |
| 207275_s_at | ACSL1    | -0.01899 | 1.07E-06 | 4.72E-05 |
| 207277_at   | CD209    | 0.025252 | 7.47E-10 | 1.89E-07 |
| 207291_at   | PRRG4    | -0.01048 | 0.001367 | 0.014042 |
| 207315_at   | CD226    | 0.009467 | 0.002583 | 0.023221 |
| 207320_x_at | STAU1    | -0.01028 | 2.04E-06 | 7.67E-05 |
| 207332_s_at | TFRC     | -0.01101 | 0.006081 | 0.044558 |
| 207334_s_at | TGFBR2   | 0.012573 | 0.002102 | 0.01976  |
| 207339_s_at | LTB      | 0.018785 | 2.78E-08 | 2.84E-06 |
| 207344_at   | AKAP3    | -0.00604 | 0.004068 | 0.033028 |
| 207352_s_at | GABRB2   | -0.00858 | 0.001406 | 0.014346 |
| 207362_at   | SLC30A4  | -0.0106  | 0.000893 | 0.010009 |
| 207378_at   | TREH     | -0.0092  | 0.001674 | 0.016525 |
| 207387_s_at | GK       | -0.01994 | 3.11E-08 | 3.08E-06 |
| 207388_s_at | PTGES    | 0.005535 | 0.002818 | 0.024842 |
| 207400_at   | NPY5R    | 0.009731 | 0.003887 | 0.031906 |
| 207407_x_at | CYP4A11  | -0.02401 | 5.21E-08 | 4.57E-06 |
| 207419_s_at | RAC2     | 0.007717 | 0.00038  | 0.005111 |
| 207429_at   | SLC22A2  | -0.01055 | 0.000211 | 0.00319  |
| 207444_at   | SLC22A13 | -0.01923 | 7.85E-08 | 6.07E-06 |
| 207456_at   | HNF4G    | -0.01346 | 0.000188 | 0.002903 |
| 207480_s_at | MEIS2    | 0.01021  | 0.00114  | 0.012168 |
| 207485_x_at | BTN3A1   | 0.006849 | 0.007046 | 0.049331 |
| 207486_x_at | CHN2     | -0.00738 | 0.000655 | 0.007845 |
| 207496_at   | MS4A2    | 0.00784  | 0.002153 | 0.020122 |
| 207497_s_at | MS4A2    | 0.014997 | 4.95E-06 | 0.000154 |
| 207507_s_at | ATP5G3   | -0.00605 | 0.003011 | 0.026168 |
| 207508_at   | ATP5G3   | -0.00521 | 0.003024 | 0.026235 |
| 207522_s_at | ATP2A3   | 0.008593 | 0.000953 | 0.01055  |
| 207535_s_at | NFKB2    | 0.007151 | 0.005359 | 0.040561 |
| 207540_s_at | SYK      | 0.007257 | 0.005459 | 0.0411   |
| 207544_s_at | ADH6     | -0.02252 | 4.32E-06 | 0.00014  |
| 207545_s_at | NUMB     | -0.00825 | 0.000832 | 0.009468 |
| 207560_at   | SLC28A1  | -0.01416 | 2.74E-05 | 0.000603 |
| 207567_at   | SLC13A2  | -0.02093 | 3.44E-08 | 3.29E-06 |
| 207571_x_at | C1orf38  | 0.012411 | 0.000123 | 0.002065 |
| 207574_s_at | GADD45B  | -0.00993 | 0.006276 | 0.045445 |
| 207584_at   | LPA      | -0.00813 | 0.001966 | 0.018792 |
| 207610_s_at | EMR2     | 0.00923  | 0.003704 | 0.030804 |
| 207651_at   | GPR171   | 0.017178 | 6.9E-05  | 0.001288 |
| 207655_s_at | BLNK     | 0.00985  | 0.002545 | 0.022962 |
| 207677_s_at | NCF4     | 0.00953  | 0.003144 | 0.027098 |
| 207688_s_at |          | 0.006838 | 0.000745 | 0.008674 |
| 207697_x_at | LILRB2   | 0.009017 | 0.001147 | 0.01223  |
| 207705_s_at | NINL     | -0.01538 | 3.08E-07 | 1.75E-05 |
| 207707_s_at | SEC13    | -0.00832 | 3.27E-05 | 0.000699 |
| 207709_at   | PRKAA2   | -0.00897 | 1.52E-05 | 0.000375 |
| 207729_at   | CDH9     | -0.00626 | 0.004092 | 0.033101 |
| 207741_x_at | TPSAB1   | 0.020271 | 2.27E-06 | 8.36E-05 |

|             |          |          |          |          |
|-------------|----------|----------|----------|----------|
| 207761_s_at | METTL7A  | -0.00969 | 5.53E-07 | 2.78E-05 |
| 207766_at   | CDKL1    | -0.0119  | 0.000793 | 0.009108 |
| 207771_at   | SLC5A2   | -0.01227 | 0.003587 | 0.030072 |
| 207777_s_at | SP140    | 0.010676 | 0.001422 | 0.014481 |
| 207826_s_at | ID3      | 0.007039 | 0.003545 | 0.029781 |
| 207837_at   | RBPMS    | -0.00754 | 0.0026   | 0.023331 |
| 207843_x_at | CYB5A    | -0.01482 | 1.49E-09 | 3.29E-07 |
| 207851_s_at | INSR     | -0.01513 | 0.000372 | 0.005023 |
| 207858_s_at | PKLR     | -0.03356 | 3.39E-10 | 1.18E-07 |
| 207871_s_at | ST7      | -0.00811 | 0.001137 | 0.012161 |
| 207894_s_at | TCL6     | -0.01429 | 6.6E-05  | 0.001245 |
| 207904_s_at | LNPEP    | 0.008139 | 0.005538 | 0.041489 |
| 207945_s_at | CSNK1D   | -0.00783 | 0.005349 | 0.040513 |
| 207950_s_at | ANK3     | -0.00911 | 0.00077  | 0.008906 |
| 207957_s_at | PRKCB    | 0.015428 | 0.000123 | 0.002066 |
| 207958_at   | UGT2A1   | -0.01281 | 0.006344 | 0.045748 |
| 207981_s_at | ESRRG    | -0.01534 | 3.59E-07 | 1.95E-05 |
| 208002_s_at | ACOT7    | -0.01528 | 1.32E-05 | 0.000335 |
| 208006_at   | FOX11    | -0.01072 | 0.000284 | 0.004071 |
| 208010_s_at | PTPN22   | 0.009556 | 0.001192 | 0.012627 |
| 208012_x_at | SP110    | 0.013243 | 1.82E-06 | 6.96E-05 |
| 208018_s_at | HCK      | 0.007944 | 0.000455 | 0.00587  |
| 208029_s_at | LAPTM4B  | 0.009196 | 0.003407 | 0.028934 |
| 208034_s_at | PROZ     | -0.0227  | 0.000187 | 0.002897 |
| 208056_s_at | CBFA2T3  | 0.007497 | 0.00394  | 0.032245 |
| 208083_s_at | ITGB6    | 0.029575 | 7.15E-06 | 0.000206 |
| 208084_at   | ITGB6    | 0.030903 | 1.85E-05 | 0.000435 |
| 208091_s_at | VOPP1    | 0.0138   | 3.01E-06 | 0.000105 |
| 208092_s_at | FAM49A   | 0.013599 | 5.68E-05 | 0.001099 |
| 208116_s_at | MAN1A1   | -0.00831 | 0.000597 | 0.007276 |
| 208131_s_at | PTGIS    | 0.011561 | 0.001196 | 0.012646 |
| 208146_s_at | CPVL     | 0.014438 | 0.000858 | 0.009685 |
| 208147_s_at | CYP2C8   | -0.00861 | 0.001555 | 0.015529 |
| 208153_s_at | FAT2     | -0.00605 | 0.005485 | 0.041205 |
| 208169_s_at | PTGER3   | -0.00901 | 0.001533 | 0.015367 |
| 208177_at   | SLC34A1  | -0.03523 | 9.95E-09 | 1.31E-06 |
| 208184_s_at | TRAPPC10 | -0.00768 | 0.003213 | 0.027518 |
| 208189_s_at | MYO7A    | -0.00781 | 0.004001 | 0.032658 |
| 208228_s_at | FGFR2    | -0.00796 | 0.00378  | 0.031224 |
| 208229_at   | FGFR2    | -0.01039 | 0.00357  | 0.029967 |
| 208284_x_at | GGT1     | -0.01295 | 0.000464 | 0.005938 |
| 208296_x_at | TNFAIP8  | 0.017839 | 1.19E-08 | 1.52E-06 |
| 208306_x_at | HLA-DRB1 | 0.009887 | 0.006542 | 0.046758 |
| 208317_at   | XYLB     | -0.00649 | 0.006104 | 0.04466  |
| 208318_s_at | XYLB     | -0.02178 | 6.44E-05 | 0.001217 |
| 208321_s_at | CABP1    | -0.00812 | 0.002662 | 0.023728 |
| 208322_s_at | ST3GAL1  | -0.01086 | 0.001762 | 0.017264 |
| 208335_s_at | DARC     | 0.009349 | 0.002119 | 0.019867 |
| 208354_s_at | SLC12A3  | -0.01846 | 0.002988 | 0.026003 |

|             |          |          |          |          |
|-------------|----------|----------|----------|----------|
| 208367_x_at | CYP3A4   | -0.01132 | 4.94E-05 | 0.000978 |
| 208369_s_at | GCDH     | -0.02126 | 5.63E-09 | 8.41E-07 |
| 208383_s_at | PCK1     | -0.02165 | 3E-06    | 0.000105 |
| 208398_s_at | TBPL1    | 0.007531 | 0.001304 | 0.013587 |
| 208423_s_at | MSR1     | 0.017252 | 6.21E-05 | 0.001182 |
| 208429_x_at | HNF4A    | -0.02027 | 2.5E-05  | 0.000555 |
| 208436_s_at | IRF7     | 0.007625 | 0.00409  | 0.033101 |
| 208438_s_at | FGR      | 0.011712 | 9.96E-05 | 0.00174  |
| 208449_s_at | FGF8     | 0.005158 | 0.006166 | 0.044988 |
| 208450_at   | LGALS2   | -0.01084 | 0.004304 | 0.034401 |
| 208456_s_at | RRAS2    | -0.0089  | 0.000443 | 0.005745 |
| 208473_s_at | GP2      | -0.00963 | 0.004314 | 0.03445  |
| 208540_x_at | S100A11  | 0.007996 | 0.000653 | 0.007833 |
| 208549_x_at | PTMA     | 0.004341 | 0.000856 | 0.009672 |
| 208561_at   | ABCC9    | 0.017469 | 0.00049  | 0.006224 |
| 208581_x_at | MT1X     | -0.01333 | 0.004085 | 0.033101 |
| 208589_at   | TRPC7    | -0.0104  | 0.000601 | 0.007313 |
| 208596_s_at | UGT1A1   | -0.01836 | 1.13E-05 | 0.000297 |
| 208607_s_at | SAA1     | 0.010395 | 0.000577 | 0.007073 |
| 208616_s_at | PTP4A2   | 0.00377  | 0.006091 | 0.044606 |
| 208617_s_at | PTP4A2   | 0.005047 | 0.004577 | 0.036014 |
| 208636_at   | ACTN1    | 0.013996 | 3.51E-05 | 0.000734 |
| 208637_x_at | ACTN1    | 0.012335 | 0.00123  | 0.012938 |
| 208653_s_at | CD164    | -0.00879 | 0.000972 | 0.010718 |
| 208659_at   | CLIC1    | 0.00831  | 0.000803 | 0.009207 |
| 208660_at   | CS       | -0.00577 | 0.00079  | 0.009089 |
| 208666_s_at | ST13     | -0.00734 | 0.000175 | 0.002758 |
| 208667_s_at | ST13     | -0.0081  | 0.000673 | 0.007996 |
| 208678_at   | ATP6V1E1 | -0.00802 | 7.91E-08 | 6.08E-06 |
| 208679_s_at | ARPC2    | 0.009633 | 0.005795 | 0.042946 |
| 208687_x_at | HSPA8    | -0.00587 | 0.000233 | 0.003466 |
| 208690_s_at | PDLIM1   | 0.018718 | 4.89E-08 | 4.36E-06 |
| 208692_at   | RPS3     | 0.007659 | 0.005254 | 0.039958 |
| 208705_s_at | EIF5     | -0.00674 | 0.002301 | 0.021202 |
| 208706_s_at | EIF5     | -0.00516 | 0.000824 | 0.009391 |
| 208707_at   | EIF5     | -0.01295 | 8.63E-06 | 0.000238 |
| 208708_x_at | EIF5     | -0.00493 | 0.0004   | 0.005312 |
| 208713_at   | HNRNPUL1 | 0.004965 | 0.002887 | 0.025298 |
| 208717_at   | OXA1L    | -0.00807 | 0.001386 | 0.014193 |
| 208729_x_at | HLA-B    | 0.014563 | 0.001128 | 0.012101 |
| 208747_s_at | C1S      | 0.024911 | 1.77E-08 | 2.04E-06 |
| 208752_x_at | NAP1L1   | 0.008544 | 6.41E-06 | 0.000189 |
| 208753_s_at | NAP1L1   | 0.007895 | 0.003677 | 0.030623 |
| 208754_s_at | NAP1L1   | 0.010823 | 0.000336 | 0.004643 |
| 208769_at   | EIF4EBP2 | -0.01339 | 0.000543 | 0.006744 |
| 208770_s_at | EIF4EBP2 | -0.00815 | 9.74E-07 | 4.43E-05 |
| 208777_s_at | PSMD11   | -0.006   | 0.00477  | 0.037113 |
| 208782_at   | FSTL1    | 0.010405 | 0.002766 | 0.024507 |
| 208789_at   | PTRF     | 0.012369 | 0.000228 | 0.003396 |

|             |           |          |          |          |
|-------------|-----------|----------|----------|----------|
| 208790_s_at | PTRF      | 0.01127  | 0.000379 | 0.005107 |
| 208791_at   | CLU       | 0.016611 | 0.001814 | 0.017649 |
| 208792_s_at | CLU       | 0.013955 | 0.004945 | 0.038132 |
| 208796_s_at | CCNG1     | -0.00558 | 0.005185 | 0.0395   |
| 208804_s_at | SRSF6     | -0.00767 | 0.000273 | 0.003955 |
| 208807_s_at | CHD3      | 0.007566 | 0.000317 | 0.00445  |
| 208808_s_at | HMGB2     | 0.011792 | 2.54E-05 | 0.000562 |
| 208812_x_at | HLA-C     | 0.011222 | 0.000892 | 0.010009 |
| 208813_at   | GOT1      | -0.0144  | 3.24E-07 | 1.8E-05  |
| 208816_x_at | ANXA2P2   | 0.014581 | 6.52E-08 | 5.38E-06 |
| 208829_at   | TAPBP     | 0.011862 | 0.001679 | 0.016556 |
| 208830_s_at | SUPT6H    | -0.00755 | 0.00504  | 0.038705 |
| 208837_at   | TMED3     | 0.008855 | 0.003257 | 0.027865 |
| 208840_s_at | G3BP2     | -0.00594 | 0.002626 | 0.023474 |
| 208847_s_at | ADH5      | -0.00766 | 6.14E-05 | 0.00117  |
| 208848_at   | ADH5      | -0.00914 | 0.001537 | 0.015393 |
| 208850_s_at | THY1      | -0.01677 | 0.00134  | 0.013857 |
| 208851_s_at | THY1      | -0.01965 | 6.07E-05 | 0.001158 |
| 208858_s_at | ESYT1     | 0.006692 | 0.005763 | 0.042748 |
| 208864_s_at | TXN       | -0.00893 | 2.51E-05 | 0.000556 |
| 208868_s_at | GABARAPL1 | -0.00916 | 2.22E-05 | 0.000505 |
| 208869_s_at | GABARAPL1 | -0.00559 | 0.001117 | 0.012003 |
| 208870_x_at | ATP5C1    | -0.00812 | 6.63E-05 | 0.001249 |
| 208881_x_at | IDI1      | -0.00588 | 0.000688 | 0.008132 |
| 208885_at   | LCP1      | 0.022095 | 2.17E-07 | 1.34E-05 |
| 208894_at   | HLA-DRA   | 0.019367 | 0.000546 | 0.006761 |
| 208898_at   | ATP6V1D   | -0.00646 | 0.006724 | 0.047675 |
| 208901_s_at | TOP1      | -0.00423 | 0.002425 | 0.022072 |
| 208903_at   | RPS28     | -0.006   | 0.004535 | 0.03575  |
| 208909_at   | UQCRRFS1  | -0.00786 | 0.000461 | 0.00591  |
| 208910_s_at | C1QBP     | -0.0086  | 0.000139 | 0.002282 |
| 208914_at   | GGA2      | -0.01227 | 6.56E-05 | 0.001239 |
| 208921_s_at | SRI       | 0.007317 | 0.002579 | 0.023206 |
| 208944_at   | TGFBR2    | 0.011887 | 5.8E-05  | 0.001117 |
| 208948_s_at | STAU1     | -0.01054 | 1.39E-05 | 0.00035  |
| 208950_s_at | ALDH7A1   | -0.01379 | 5.39E-06 | 0.000165 |
| 208951_at   | ALDH7A1   | -0.01444 | 0.000134 | 0.002213 |
| 208965_s_at | IFI16     | 0.023802 | 2.54E-09 | 4.82E-07 |
| 208966_x_at | IFI16     | 0.025742 | 8.84E-10 | 2.14E-07 |
| 208969_at   | NDUFA9    | -0.0084  | 8.96E-05 | 0.001595 |
| 208981_at   | PECAM1    | 0.010927 | 0.000284 | 0.004071 |
| 208982_at   | PECAM1    | 0.011946 | 0.001581 | 0.015712 |
| 208983_s_at | PECAM1    | 0.016299 | 0.00565  | 0.042079 |
| 208997_s_at | UCP2      | 0.02229  | 1.16E-06 | 4.99E-05 |
| 208998_at   | UCP2      | 0.017937 | 2.2E-05  | 0.000501 |
| 209001_s_at | ANAPC13   | -0.00544 | 0.006511 | 0.046611 |
| 209003_at   | SLC25A11  | -0.01269 | 6.93E-06 | 0.000201 |
| 209004_s_at | FBXL5     | -0.00896 | 0.000408 | 0.005386 |
| 209005_at   | FBXL5     | -0.01311 | 2.44E-05 | 0.000545 |

|             |          |          |          |          |
|-------------|----------|----------|----------|----------|
| 209017_s_at | LONP1    | -0.00929 | 0.000774 | 0.00894  |
| 209019_s_at | PINK1    | -0.00748 | 0.007045 | 0.049331 |
| 209036_s_at | MDH2     | -0.00744 | 0.000673 | 0.007996 |
| 209040_s_at | PSMB8    | 0.014942 | 4.69E-06 | 0.000148 |
| 209051_s_at | RALGDS   | 0.006121 | 0.004737 | 0.036962 |
| 209061_at   | NCOA3    | 0.007495 | 0.000371 | 0.005016 |
| 209065_at   | UQCRB    | -0.00794 | 0.003613 | 0.030215 |
| 209077_at   | TXN2     | -0.00981 | 0.001023 | 0.011182 |
| 209083_at   | CORO1A   | 0.017941 | 2.27E-06 | 8.36E-05 |
| 209087_x_at | MCAM     | 0.009341 | 0.005924 | 0.043726 |
| 209094_at   | DDAH1    | -0.00817 | 2.16E-06 | 8.06E-05 |
| 209095_at   | DLD      | -0.00891 | 0.00039  | 0.005213 |
| 209099_x_at | JAG1     | 0.008415 | 0.004975 | 0.038295 |
| 209111_at   | RNF5     | -0.00767 | 0.001011 | 0.011073 |
| 209112_at   | CDKN1B   | 0.009147 | 0.00123  | 0.012938 |
| 209118_s_at | TUBA1A   | 0.014219 | 1.74E-05 | 0.000418 |
| 209120_at   | NR2F2    | 0.009569 | 8.96E-07 | 4.14E-05 |
| 209122_at   | PLIN2    | -0.0181  | 1.61E-05 | 0.000393 |
| 209123_at   | QDPR     | -0.02461 | 1.44E-10 | 6.52E-08 |
| 209138_x_at | IGL@     | 0.035424 | 2.87E-05 | 0.000628 |
| 209140_x_at | HLA-B    | 0.013663 | 0.000382 | 0.005123 |
| 209146_at   | SC4MOL   | -0.00525 | 0.004595 | 0.03613  |
| 209160_at   | AKR1C3   | -0.01066 | 0.003442 | 0.02914  |
| 209161_at   | PRPF4    | -0.00969 | 0.000338 | 0.00466  |
| 209167_at   | GPM6B    | 0.021116 | 1.9E-05  | 0.000446 |
| 209168_at   | GPM6B    | 0.01113  | 0.000739 | 0.008615 |
| 209169_at   | GPM6B    | 0.008007 | 0.0062   | 0.045092 |
| 209170_s_at | GPM6B    | 0.013961 | 0.000725 | 0.00849  |
| 209173_at   | AGR2     | 0.045169 | 4.86E-15 | 5.41E-11 |
| 209177_at   | NDUFAF3  | -0.00669 | 0.00214  | 0.020021 |
| 209180_at   | RABGGTB  | -0.00577 | 0.005411 | 0.040891 |
| 209183_s_at | C10orf10 | 0.01605  | 0.004906 | 0.037929 |
| 209191_at   | TUBB6    | 0.021685 | 1.93E-06 | 7.33E-05 |
| 209198_s_at | SYT11    | 0.01508  | 0.000174 | 0.002742 |
| 209199_s_at | MEF2C    | 0.009294 | 0.00063  | 0.007598 |
| 209201_x_at | CXCR4    | 0.024345 | 2.5E-05  | 0.000555 |
| 209205_s_at | LMO4     | 0.010014 | 6.43E-05 | 0.001215 |
| 209209_s_at | FERMT2   | -0.00765 | 0.005975 | 0.043972 |
| 209222_s_at | OSBPL2   | -0.00772 | 1.03E-05 | 0.000276 |
| 209228_x_at | TUSC3    | 0.007353 | 0.005101 | 0.039006 |
| 209234_at   | KIF1B    | -0.00997 | 2.15E-05 | 0.000494 |
| 209244_s_at | KIF1C    | -0.00678 | 0.003189 | 0.027365 |
| 209248_at   | GHITM    | -0.00562 | 0.000123 | 0.002065 |
| 209249_s_at | GHITM    | -0.01014 | 1.74E-06 | 6.79E-05 |
| 209262_s_at | NR2F6    | -0.00826 | 0.001026 | 0.011207 |
| 209273_s_at | ISCA1    | -0.00653 | 0.001197 | 0.012651 |
| 209276_s_at | GLRX     | -0.00993 | 0.00039  | 0.005215 |
| 209277_at   | TFPI2    | 0.011796 | 0.002548 | 0.022974 |
| 209278_s_at | TFPI2    | 0.025575 | 3.95E-06 | 0.00013  |

|             |          |           |          |          |
|-------------|----------|-----------|----------|----------|
| 209286_at   | CDC42EP3 | 0.01306   | 0.000616 | 0.007471 |
| 209287_s_at | CDC42EP3 | 0.008976  | 0.000458 | 0.005888 |
| 209289_at   | NFIB     | -7.82E-03 | 0.001615 | 0.016006 |
| 209290_s_at | NFIB     | -0.00539  | 0.004745 | 0.036999 |
| 209301_at   | CA2      | -0.01569  | 7.01E-06 | 0.000203 |
| 209307_at   | SWAP70   | 0.008796  | 0.00143  | 0.014524 |
| 209308_s_at | BNIP2    | 0.008905  | 0.001538 | 0.015395 |
| 209309_at   | AZGP1    | -0.02826  | 1.59E-06 | 6.32E-05 |
| 209310_s_at | CASP4    | 0.012275  | 3.28E-06 | 0.000113 |
| 209311_at   | BCL2L2   | -0.00766  | 0.005933 | 0.04378  |
| 209312_x_at | HLA-DRB1 | 0.01557   | 0.006879 | 0.048497 |
| 209324_s_at | RGS16    | 0.013257  | 0.002171 | 0.020215 |
| 209325_s_at | RGS16    | 0.011617  | 0.000278 | 0.004007 |
| 209334_s_at | PSMD9    | -0.01356  | 0.000393 | 0.005241 |
| 209335_at   | DCN      | 0.018173  | 0.001069 | 0.011564 |
| 209340_at   | UAP1     | -0.01172  | 0.000199 | 0.00304  |
| 209343_at   | EFHD1    | -0.00853  | 0.000467 | 0.005974 |
| 209344_at   | TPM4     | 0.012312  | 0.004287 | 0.034295 |
| 209356_x_at | EFEMP2   | 0.008884  | 0.003366 | 0.028642 |
| 209360_s_at | RUNX1    | 0.012029  | 2.77E-05 | 0.000608 |
| 209366_x_at | CYB5A    | -0.01721  | 1.47E-10 | 6.52E-08 |
| 209368_at   | EPHX2    | -0.02239  | 6.7E-08  | 5.45E-06 |
| 209369_at   | ANXA3    | 0.01836   | 8.08E-06 | 0.000226 |
| 209371_s_at | SH3BP2   | -0.01751  | 7.35E-05 | 0.001364 |
| 209374_s_at | IGHM     | 0.03297   | 1.64E-08 | 1.94E-06 |
| 209384_at   | PROSC    | -0.00908  | 0.000586 | 0.007161 |
| 209385_s_at | PROSC    | -0.01263  | 0.000306 | 0.004322 |
| 209386_at   | TM4SF1   | 0.015919  | 1.75E-05 | 0.000418 |
| 209387_s_at | TM4SF1   | 0.00993   | 0.000906 | 0.010122 |
| 209390_at   | TSC1     | -0.00723  | 0.001382 | 0.014157 |
| 209409_at   | GRB10    | -0.01299  | 5.11E-05 | 0.001008 |
| 209410_s_at | GRB10    | -0.01234  | 0.000209 | 0.003164 |
| 209420_s_at | SMPD1    | -0.00709  | 0.006135 | 0.044854 |
| 209435_s_at | ARHGEF2  | 0.012695  | 4.23E-06 | 0.000138 |
| 209436_at   | SPON1    | 0.014184  | 0.00216  | 0.020156 |
| 209437_s_at | SPON1    | 0.011758  | 0.00409  | 0.033101 |
| 209440_at   | PRPS1    | 0.006339  | 0.005063 | 0.038824 |
| 209442_x_at | ANK3     | -0.00848  | 0.000275 | 0.003972 |
| 209443_at   | SERPINA5 | -0.0142   | 0.000609 | 0.007396 |
| 209459_s_at | ABAT     | -0.02852  | 1.47E-09 | 3.27E-07 |
| 209460_at   | ABAT     | -0.0303   | 7.79E-13 | 1.86E-09 |
| 209465_x_at | PTN      | 0.014405  | 0.000477 | 0.006078 |
| 209466_x_at | PTN      | 0.014909  | 0.003418 | 0.02901  |
| 209473_at   | ENTPD1   | 0.007619  | 0.000381 | 0.005123 |
| 209485_s_at | OSBPL1A  | -0.00875  | 0.002932 | 0.025618 |
| 209492_x_at | ATP5I    | -0.0034   | 0.00134  | 0.013857 |
| 209493_at   | PDZD2    | -0.0196   | 1.75E-06 | 6.81E-05 |
| 209498_at   | CEACAM1  | -0.00965  | 0.006584 | 0.046962 |
| 209510_at   | RNF139   | 0.007098  | 0.001694 | 0.016665 |

|             |          |          |          |          |
|-------------|----------|----------|----------|----------|
| 209512_at   | HSDL2    | -0.01194 | 0.000946 | 0.010483 |
| 209513_s_at | HSDL2    | -0.01249 | 4.41E-07 | 2.29E-05 |
| 209514_s_at | RAB27A   | 0.018851 | 1.37E-06 | 5.67E-05 |
| 209515_s_at | RAB27A   | 0.01188  | 0.000253 | 0.003702 |
| 209522_s_at | CRAT     | -0.01752 | 1.78E-06 | 6.88E-05 |
| 209526_s_at | HDGFRP3  | 0.007666 | 0.006087 | 0.04459  |
| 209536_s_at | EHD4     | 0.00641  | 0.002175 | 0.020249 |
| 209539_at   | ARHGEF6  | 0.013054 | 0.000908 | 0.01014  |
| 209546_s_at | APOL1    | 0.012706 | 0.000202 | 0.003084 |
| 209549_s_at | DGUOK    | 0.006513 | 0.004124 | 0.033313 |
| 209550_at   | NDN      | 0.012825 | 8.08E-08 | 6.16E-06 |
| 209555_s_at | CD36     | 0.008187 | 0.006532 | 0.046699 |
| 209563_x_at | CALM1    | -0.00557 | 2.18E-05 | 0.000498 |
| 209571_at   | CIR1     | 0.005859 | 0.00699  | 0.049047 |
| 209572_s_at | EED      | 0.005941 | 0.00419  | 0.033759 |
| 209576_at   | GNAI1    | 0.017664 | 1.74E-07 | 1.1E-05  |
| 209577_at   | PCYT2    | -0.01239 | 0.000425 | 0.005568 |
| 209584_x_at | APOBEC3C | 0.008558 | 2.27E-05 | 0.000513 |
| 209585_s_at | MINPP1   | -0.01045 | 0.000846 | 0.009565 |
| 209600_s_at | ACOX1    | -0.01889 | 6.74E-11 | 3.85E-08 |
| 209605_at   | TST      | -0.01682 | 3.22E-09 | 5.69E-07 |
| 209606_at   | CYTIP    | 0.015965 | 7.47E-05 | 0.001384 |
| 209608_s_at | ACAT2    | -0.00855 | 0.001923 | 0.018431 |
| 209612_s_at | ADH1B    | 0.02544  | 3.54E-06 | 0.00012  |
| 209613_s_at | ADH1B    | 0.025064 | 8.92E-05 | 0.001592 |
| 209614_at   | ADH1B    | 0.015496 | 4E-05    | 0.000817 |
| 209620_s_at | ABCB7    | -0.00617 | 0.001325 | 0.013744 |
| 209623_at   | MCCC2    | -0.01356 | 2.59E-07 | 1.53E-05 |
| 209624_s_at | MCCC2    | -0.01361 | 3.57E-07 | 1.95E-05 |
| 209640_at   | PML      | 0.004611 | 0.002031 | 0.019266 |
| 209645_s_at | ALDH1B1  | -0.01472 | 2.89E-05 | 0.000631 |
| 209646_x_at | ALDH1B1  | -0.00833 | 5.35E-05 | 0.001047 |
| 209655_s_at | TMEM47   | 0.007628 | 0.004196 | 0.033777 |
| 209656_s_at | TMEM47   | 0.010221 | 0.003284 | 0.028066 |
| 209663_s_at | ITGA7    | -0.00944 | 0.003722 | 0.030898 |
| 209667_at   | CES2     | -0.0166  | 8E-09    | 1.13E-06 |
| 209668_x_at | CES2     | -0.01673 | 0.000453 | 0.005848 |
| 209670_at   | TRAC     | 0.012449 | 1E-05    | 0.000269 |
| 209671_x_at | TRAC     | 0.01861  | 1.49E-06 | 6.04E-05 |
| 209679_s_at | SMAGP    | 0.010119 | 0.002113 | 0.019844 |
| 209681_at   | SLC19A2  | -0.01054 | 0.001378 | 0.014136 |
| 209683_at   | FAM49A   | 0.008206 | 0.001187 | 0.012595 |
| 209685_s_at | PRKCB    | 0.019626 | 2.77E-07 | 1.62E-05 |
| 209686_at   | S100B    | 0.017366 | 6.77E-09 | 9.79E-07 |
| 209687_at   | CXCL12   | 0.012082 | 0.004898 | 0.037911 |
| 209692_at   | EYA2     | -0.00786 | 0.00137  | 0.014074 |
| 209696_at   | FBP1     | -0.02522 | 1.09E-07 | 7.84E-06 |
| 209703_x_at | METTTL7A | -0.01119 | 7.7E-06  | 0.000218 |
| 209708_at   | MOXD1    | 0.026921 | 1.75E-06 | 6.81E-05 |



|             |           |          |          |          |
|-------------|-----------|----------|----------|----------|
| 209711_at   | SLC35D1   | -0.01159 | 0.004088 | 0.033101 |
| 209715_at   | CBX5      | 0.00784  | 0.001134 | 0.012148 |
| 209722_s_at | SERPINB9  | 0.008684 | 0.000544 | 0.006744 |
| 209723_at   | SERPINB9  | 0.014465 | 9.83E-06 | 0.000265 |
| 209728_at   | HLA-DRB4  | 0.023025 | 0.005134 | 0.039208 |
| 209732_at   | CLEC2B    | 0.022448 | 6.26E-06 | 0.000185 |
| 209734_at   | NCKAP1L   | 0.010561 | 0.000712 | 0.008363 |
| 209739_s_at | PNPLA4    | -0.00868 | 0.001188 | 0.012602 |
| 209749_s_at | ACE       | -0.00801 | 0.002089 | 0.019689 |
| 209751_s_at | TRAPPC2   | 0.008023 | 0.002468 | 0.022414 |
| 209757_s_at | MYCN      | -0.01964 | 1.27E-06 | 5.37E-05 |
| 209759_s_at | DCI       | -0.00656 | 0.005047 | 0.038737 |
| 209762_x_at | SP110     | 0.016413 | 1.24E-06 | 5.25E-05 |
| 209764_at   | MGAT3     | -0.00905 | 0.002756 | 0.024431 |
| 209765_at   | ADAM19    | 0.008954 | 0.000111 | 0.001899 |
| 209771_x_at | CD24      | 0.007982 | 0.001192 | 0.012627 |
| 209773_s_at | RRM2      | 0.012822 | 0.002425 | 0.022072 |
| 209781_s_at | KHDRBS3   | -0.01003 | 0.000181 | 0.002818 |
| 209783_at   | DBP       | -0.00812 | 0.000311 | 0.004382 |
| 209788_s_at | ERAP1     | 0.010414 | 0.000439 | 0.005709 |
| 209791_at   | PADI2     | -0.01573 | 6.24E-06 | 0.000185 |
| 209795_at   | CD69      | 0.024046 | 1.06E-05 | 0.000281 |
| 209806_at   | HIST1H2BK | 0.01418  | 0.000333 | 0.004606 |
| 209823_x_at | HLA-DQB1  | 0.018153 | 2.26E-05 | 0.000512 |
| 209827_s_at | IL16      | 0.018936 | 1.46E-06 | 5.94E-05 |
| 209833_at   | CRADD     | -0.01013 | 5.24E-06 | 0.000161 |
| 209835_x_at | CD44      | 0.023589 | 1.1E-06  | 4.83E-05 |
| 209846_s_at | BTN3A2    | 0.013063 | 0.000716 | 0.008407 |
| 209857_s_at | SPHK2     | -0.0073  | 0.004375 | 0.034798 |
| 209864_at   | FRAT2     | 0.007041 | 0.001856 | 0.017971 |
| 209869_at   | ADRA2A    | 0.012091 | 0.000402 | 0.005333 |
| 209874_x_at | CNNM2     | -0.00824 | 0.001855 | 0.017968 |
| 209879_at   | SELPLG    | 0.010645 | 0.000118 | 0.001995 |
| 209897_s_at | SLIT2     | -0.0172  | 2.7E-08  | 2.79E-06 |
| 209901_x_at | AIF1      | 0.014133 | 0.000893 | 0.010009 |
| 209905_at   | HOXA10    | -0.00713 | 0.006206 | 0.04512  |
| 209906_at   | C3AR1     | 0.011832 | 0.000724 | 0.00848  |
| 209909_s_at | TGFB2     | 1.74E-02 | 6.71E-05 | 0.00126  |
| 209911_x_at | HIST1H2BD | -0.01028 | 0.000332 | 0.004605 |
| 209916_at   | DHTKD1    | -0.02376 | 4.9E-06  | 0.000153 |
| 209919_x_at | GGT1      | -0.01241 | 0.000309 | 0.004362 |
| 209933_s_at | CD300A    | 0.013158 | 2.56E-05 | 0.000566 |
| 209949_at   | NCF2      | 0.017906 | 0.000108 | 0.001856 |
| 209961_s_at | HGF       | 0.014519 | 0.002232 | 0.020669 |
| 209966_x_at | ESRRG     | -0.01221 | 4.12E-05 | 0.000839 |
| 209969_s_at | STAT1     | 0.010151 | 0.006279 | 0.045445 |
| 209970_x_at | CASP1     | 0.01816  | 1.11E-05 | 0.00029  |
| 209977_at   | PLG       | -0.04518 | 4.65E-10 | 1.39E-07 |
| 209978_s_at | LPA       | -0.05306 | 3.62E-12 | 4.48E-09 |

|             |         |          |          |          |
|-------------|---------|----------|----------|----------|
| 209980_s_at | SHMT1   | -0.01444 | 0.000565 | 0.006962 |
| 209981_at   | CSDC2   | -0.01499 | 9.75E-06 | 0.000264 |
| 209992_at   | PFKFB2  | -0.01907 | 7.8E-06  | 0.00022  |
| 210006_at   | ABHD14A | -0.00912 | 0.005019 | 0.038582 |
| 210009_s_at | GOSR2   | -0.01234 | 0.000269 | 0.003904 |
| 210010_s_at | SLC25A1 | -0.00843 | 0.006095 | 0.044617 |
| 210014_x_at | IDH3B   | -0.00831 | 0.001555 | 0.015532 |
| 210020_x_at | CALML3  | -0.0128  | 0.002063 | 0.019493 |
| 210021_s_at | CCNO    | 0.011539 | 7.55E-07 | 3.61E-05 |
| 210031_at   | CD247   | 0.013531 | 3.22E-07 | 1.8E-05  |
| 210045_at   | IDH2    | -0.01722 | 8.57E-05 | 0.001544 |
| 210046_s_at | IDH2    | -0.0182  | 5.44E-10 | 1.52E-07 |
| 210060_at   | PDE6G   | 0.005892 | 0.006642 | 0.047272 |
| 210072_at   | CCL19   | 0.029978 | 6.18E-07 | 3.09E-05 |
| 210074_at   | CTSL2   | -0.02124 | 4.69E-06 | 0.000148 |
| 210082_at   | ABCA4   | 0.006039 | 0.004302 | 0.034398 |
| 210084_x_at | TPSAB1  | 0.023206 | 5.04E-09 | 7.91E-07 |
| 210085_s_at | ANXA9   | -0.02028 | 1.78E-06 | 6.88E-05 |
| 210089_s_at | LAMA4   | 0.009682 | 0.002058 | 0.019457 |
| 210095_s_at | IGFBP3  | 0.009271 | 0.003551 | 0.029814 |
| 210114_at   | INVS    | -0.00888 | 0.002283 | 0.02108  |
| 210115_at   | RPL39L  | 0.008059 | 0.003757 | 0.031082 |
| 210116_at   | SH2D1A  | 0.018355 | 8.16E-05 | 0.001486 |
| 210119_at   | KCNJ15  | -0.01017 | 3.08E-05 | 0.000668 |
| 210127_at   | RAB6B   | 0.014126 | 0.000377 | 0.005081 |
| 210131_x_at | SDHC    | -0.00824 | 0.001465 | 0.014804 |
| 210139_s_at | PMP22   | 0.014289 | 2.21E-05 | 0.000504 |
| 210140_at   | CST7    | 0.018241 | 1.35E-05 | 0.000341 |
| 210145_at   | PLA2G4A | 0.013441 | 0.000557 | 0.006877 |
| 210146_x_at | LILRB2  | 0.014429 | 0.00517  | 0.039428 |
| 210166_at   | TLR5    | 0.011743 | 3.86E-05 | 0.000794 |
| 210199_at   | CRYAA   | -0.0202  | 0.000348 | 0.004758 |
| 210201_x_at | BIN1    | -0.01192 | 0.00054  | 0.006719 |
| 210223_s_at | MR1     | 0.007893 | 0.004914 | 0.037972 |
| 210227_at   | DLGAP2  | -0.00794 | 0.005965 | 0.043955 |
| 210260_s_at | TNFAIP8 | 0.016672 | 1.41E-07 | 9.58E-06 |
| 210284_s_at | TAB2    | -0.00629 | 0.001569 | 0.015636 |
| 210289_at   | NAT8    | -0.01951 | 0.000431 | 0.005637 |
| 210298_x_at | FHL1    | 0.016138 | 0.000508 | 0.006416 |
| 210326_at   | AGXT    | -0.01615 | 0.000165 | 0.002631 |
| 210327_s_at | AGXT    | -0.01167 | 0.001028 | 0.01122  |
| 210331_at   | HECW1   | -0.01008 | 0.006657 | 0.047353 |
| 210335_at   | RASSF9  | 0.010755 | 0.006715 | 0.047643 |
| 210337_s_at | ACLY    | -0.00811 | 0.001424 | 0.014481 |
| 210338_s_at | HSPA8   | -0.00779 | 0.001379 | 0.014136 |
| 210340_s_at | CSF2RA  | 0.007804 | 0.003646 | 0.030424 |
| 210343_s_at | SLC22A6 | -0.02813 | 4.66E-08 | 4.21E-06 |
| 210356_x_at | MS4A1   | 0.025646 | 1.55E-05 | 0.000382 |
| 210367_s_at | PTGES   | 0.009349 | 0.000146 | 0.002365 |

|             |              |          |          |          |
|-------------|--------------|----------|----------|----------|
| 210374_x_at | PTGER3       | -0.01435 | 3.11E-06 | 0.000108 |
| 210375_at   | PTGER3       | -0.01884 | 1.38E-06 | 5.7E-05  |
| 210377_at   | ACSM3        | -0.01624 | 0.00016  | 0.002552 |
| 210385_s_at | ERAP1        | 0.007548 | 0.002363 | 0.021604 |
| 210386_s_at | LOC100510712 | -0.00716 | 0.003174 | 0.02728  |
| 210390_s_at | CCL14-CCL15  | -0.02143 | 9.89E-06 | 0.000266 |
| 210399_x_at | FUT6         | -0.01457 | 1.19E-07 | 8.48E-06 |
| 210418_s_at | IDH3B        | -0.00946 | 0.001042 | 0.011345 |
| 210426_x_at | RORA         | -0.01171 | 1.04E-05 | 0.000278 |
| 210427_x_at | ANXA2        | 0.018535 | 1.28E-07 | 8.94E-06 |
| 210445_at   | FABP6        | 0.008843 | 0.003432 | 0.029103 |
| 210448_s_at | P2RX5        | 0.009541 | 0.002624 | 0.023472 |
| 210451_at   | PKLR         | -0.02545 | 2.25E-07 | 1.37E-05 |
| 210452_x_at | CYP4F2       | -0.02986 | 9.55E-10 | 2.26E-07 |
| 210471_s_at | KCNAB1       | -0.00731 | 0.002359 | 0.021584 |
| 210476_s_at | PRLR         | -0.02332 | 2.91E-09 | 5.39E-07 |
| 210479_s_at | RORA         | -0.01051 | 0.00036  | 0.004886 |
| 210493_s_at | MFAP3L       | -0.0092  | 0.001343 | 0.013863 |
| 210495_x_at | FN1          | 0.011091 | 0.002585 | 0.02323  |
| 210513_s_at | VEGFA        | -0.01532 | 1.51E-05 | 0.000375 |
| 210514_x_at | HLA-G        | 0.01104  | 0.001282 | 0.013393 |
| 210524_x_at |              | -0.009   | 0.004208 | 0.033839 |
| 210538_s_at | BIRC3        | 0.021506 | 1.99E-06 | 7.53E-05 |
| 210544_s_at | ALDH3A2      | -0.01646 | 4.07E-05 | 0.00083  |
| 210550_s_at | RASGRF1      | -0.00904 | 0.002439 | 0.022168 |
| 210614_at   | TTPA         | -0.00836 | 0.006496 | 0.046515 |
| 210619_s_at | HYAL1        | -0.01692 | 2.03E-09 | 4.04E-07 |
| 210629_x_at | LST1         | 0.015845 | 4.47E-06 | 0.000143 |
| 210638_s_at | FBXO9        | -0.00578 | 0.000974 | 0.010741 |
| 210646_x_at | RPL13A       | 0.006928 | 0.004699 | 0.03672  |
| 210653_s_at | BCKDHB       | -0.01557 | 8.1E-06  | 0.000226 |
| 210663_s_at | KYNU         | -0.01471 | 0.000238 | 0.003525 |
| 210667_s_at | C21orf33     | -0.01108 | 0.001823 | 0.017718 |
| 210674_s_at | PCDHA1       | 0.009278 | 0.004964 | 0.038237 |
| 210685_s_at | UBE4B        | -0.00904 | 0.000667 | 0.007953 |
| 210692_s_at | SLC43A3      | 0.007136 | 0.006842 | 0.04828  |
| 210737_at   | TUB          | -0.00548 | 0.005366 | 0.040561 |
| 210738_s_at | SLC4A4       | -0.0331  | 9.3E-12  | 9.48E-09 |
| 210739_x_at | SLC4A4       | -0.02431 | 6.86E-10 | 1.78E-07 |
| 210740_s_at | ITPK1        | -0.00458 | 0.00028  | 0.00403  |
| 210751_s_at | RGN          | -0.01689 | 8.39E-07 | 3.92E-05 |
| 210754_s_at | LYN          | 0.015536 | 3.71E-06 | 0.000124 |
| 210757_x_at | DAB2         | -0.01171 | 3.13E-06 | 0.000109 |
| 210764_s_at | CYR61        | 0.015009 | 0.00526  | 0.03999  |
| 210774_s_at | NCOA4        | -0.00611 | 7.04E-05 | 0.001313 |
| 210785_s_at | C1orf38      | 0.011967 | 0.000231 | 0.003431 |
| 210786_s_at | FLI1         | 0.016023 | 2.66E-08 | 2.78E-06 |
| 210796_x_at | SIGLEC6      | 0.008105 | 0.006684 | 0.047507 |
| 210798_x_at | MASP2        | -0.00464 | 0.004039 | 0.03289  |

|             |           |          |          |          |
|-------------|-----------|----------|----------|----------|
| 210807_s_at | SLC16A7   | -0.01427 | 0.00045  | 0.005823 |
| 210815_s_at | CALCRL    | 0.010278 | 0.002026 | 0.019234 |
| 210825_s_at | PEBP1     | -0.00616 | 4.65E-07 | 2.39E-05 |
| 210829_s_at | SSBP2     | 0.006962 | 0.005345 | 0.040497 |
| 210831_s_at | PTGER3    | -0.01558 | 1.15E-06 | 4.99E-05 |
| 210832_x_at | PTGER3    | -0.01803 | 4.05E-09 | 6.84E-07 |
| 210833_at   | PTGER3    | -0.02314 | 9.58E-09 | 1.28E-06 |
| 210834_s_at | PTGER3    | -0.02387 | 1.34E-08 | 1.68E-06 |
| 210839_s_at | ENPP2     | -0.01532 | 1.82E-06 | 6.96E-05 |
| 210840_s_at | IQGAP1    | 0.009566 | 0.000119 | 0.002008 |
| 210843_s_at | MFAP3L    | -0.00946 | 0.000461 | 0.00591  |
| 210852_s_at | AASS      | -0.01369 | 2.98E-09 | 5.44E-07 |
| 210862_s_at | SARDH     | -0.00669 | 0.006076 | 0.044557 |
| 210871_x_at | SSX2IP    | -0.01144 | 0.000357 | 0.004859 |
| 210879_s_at | RAB11FIP5 | -0.00997 | 0.000303 | 0.0043   |
| 210887_s_at | EVC       | 0.008829 | 0.000524 | 0.006567 |
| 210889_s_at | FCGR2B    | 0.013246 | 4.23E-05 | 0.000855 |
| 210912_x_at | GSTM4     | -0.01114 | 0.000569 | 0.006991 |
| 210915_x_at | TRBC1     | 0.033449 | 3.89E-09 | 6.72E-07 |
| 210916_s_at | CD44      | 0.022667 | 3.99E-05 | 0.000817 |
| 210933_s_at | FSCN1     | 0.01095  | 0.006156 | 0.044957 |
| 210944_s_at | CAPN3     | -0.0243  | 1.81E-07 | 1.14E-05 |
| 210947_s_at | MSH3      | -0.01033 | 0.000168 | 0.00266  |
| 210951_x_at | RAB27A    | 0.019033 | 5.39E-06 | 0.000165 |
| 210958_s_at | MAST4     | -0.00671 | 0.003413 | 0.028976 |
| 210972_x_at | TRAC      | 0.021977 | 2.45E-07 | 1.46E-05 |
| 210976_s_at | PFKM      | -0.00795 | 0.004938 | 0.038106 |
| 210982_s_at | HLA-DRA   | 0.017874 | 9.4E-06  | 0.000258 |
| 210986_s_at | TPM1      | 0.01689  | 4.74E-08 | 4.24E-06 |
| 210987_x_at | TPM1      | 0.01419  | 3.66E-08 | 3.48E-06 |
| 210990_s_at | LAMA4     | 0.007128 | 0.005957 | 0.043914 |
| 210992_x_at | FCGR2C    | 0.010289 | 6.76E-05 | 0.001267 |
| 210999_s_at | GRB10     | -0.00996 | 0.000169 | 0.00268  |
| 211002_s_at | TRIM29    | 0.008016 | 0.000897 | 0.010045 |
| 211005_at   | LAT       | 0.017233 | 1.55E-05 | 0.000383 |
| 211025_x_at | COX5B     | -0.00526 | 0.005794 | 0.042946 |
| 211028_s_at | KHK       | -0.03023 | 1.63E-09 | 3.5E-07  |
| 211058_x_at | TUBA1B    | 0.00869  | 0.000819 | 0.009361 |
| 211067_s_at | GAS7      | 0.005809 | 0.006165 | 0.044988 |
| 211072_x_at | TUBA1B    | 0.009657 | 0.000406 | 0.005369 |
| 211075_s_at | CD47      | 0.014125 | 9.78E-07 | 4.43E-05 |
| 211083_s_at | MAP3K13   | -0.01276 | 0.000246 | 0.003625 |
| 211105_s_at | NFATC1    | 0.008967 | 0.000988 | 0.010867 |
| 211136_s_at | CLPTM1    | -0.01403 | 0.002171 | 0.020215 |
| 211138_s_at | KMO       | -0.03072 | 5.1E-10  | 1.48E-07 |
| 211148_s_at | ANGPT2    | 0.008207 | 0.001181 | 0.012547 |
| 211150_s_at | DLAT      | -0.00978 | 7.92E-05 | 0.001449 |
| 211161_s_at | COL3A1    | 0.018824 | 0.000788 | 0.009076 |
| 211162_x_at | SCD       | -0.01274 | 6.82E-06 | 0.000199 |

|             |           |           |          |          |
|-------------|-----------|-----------|----------|----------|
| 211168_s_at | UPF1      | -0.0091   | 0.000698 | 0.008233 |
| 211170_s_at | PDE10A    | -0.01181  | 1.64E-05 | 0.000399 |
| 211178_s_at | PSTPIP1   | 0.006561  | 0.00513  | 0.039207 |
| 211181_x_at | RUNX1     | 0.008845  | 0.004759 | 0.037068 |
| 211182_x_at | RUNX1     | 0.013121  | 0.001065 | 0.011535 |
| 211184_s_at | USH1C     | -0.01312  | 0.001203 | 0.012707 |
| 211192_s_at | CD84      | 0.014278  | 0.000153 | 0.002468 |
| 211202_s_at | KDM5B     | 0.007432  | 0.001877 | 0.018058 |
| 211231_x_at | CYP4A11   | -0.03057  | 6.74E-08 | 5.46E-06 |
| 211256_x_at | BTN2A1    | 0.007208  | 0.003845 | 0.031641 |
| 211275_s_at | GYG1      | 0.009576  | 0.000612 | 0.007431 |
| 211298_s_at | ALB       | -0.04647  | 7.64E-09 | 1.08E-06 |
| 211302_s_at | PDE4B     | 0.009682  | 0.000683 | 0.008096 |
| 211303_x_at | FOLH1B    | -0.02525  | 2.79E-06 | 9.92E-05 |
| 211337_s_at | TUBGCP4   | -0.01029  | 0.000156 | 0.0025   |
| 211348_s_at | CDC14B    | -0.006    | 0.000423 | 0.005555 |
| 211352_s_at | NCOA3     | 0.009939  | 0.000498 | 0.006319 |
| 211357_s_at | ALDOB     | -0.01773  | 1.02E-05 | 0.000273 |
| 211360_s_at | ITPR2     | -0.00834  | 0.003723 | 0.030898 |
| 211366_x_at | CASP1     | 0.018155  | 5.47E-08 | 4.73E-06 |
| 211367_s_at | CASP1     | 0.016915  | 5.82E-05 | 0.001121 |
| 211368_s_at | CASP1     | 0.023007  | 4.85E-07 | 2.47E-05 |
| 211382_s_at | TACC2     | -0.00754  | 0.006034 | 0.044287 |
| 211395_x_at | FCGR2C    | 0.010452  | 0.000748 | 0.008698 |
| 211406_at   | IER3IP1   | -0.00493  | 0.003162 | 0.027211 |
| 211417_x_at | GGT1      | -0.01224  | 0.000115 | 0.001953 |
| 211428_at   | SERPINA1  | -0.00659  | 0.005365 | 0.040561 |
| 211429_s_at | SERPINA1  | -0.01414  | 0.000103 | 0.001781 |
| 211430_s_at | IGHG1     | 0.041871  | 5.41E-06 | 0.000165 |
| 211456_x_at | MT1P2     | -0.01291  | 0.00218  | 0.020275 |
| 211458_s_at | GABARAPL1 | -0.00487  | 0.00236  | 0.021584 |
| 211465_x_at | FUT6      | -0.01807  | 3.2E-08  | 3.12E-06 |
| 211468_s_at | RECQL5    | -0.00895  | 0.000248 | 0.003641 |
| 211470_s_at | SULT1C2   | -0.01231  | 1.38E-06 | 5.68E-05 |
| 211488_s_at | ITGB8     | 0.015683  | 0.000122 | 0.002056 |
| 211494_s_at | SLC4A4    | -2.05E-02 | 2.75E-10 | 1.04E-07 |
| 211502_s_at | CDK14     | -0.00871  | 0.000399 | 0.005301 |
| 211505_s_at | STAU1     | -0.0143   | 6.29E-05 | 0.001194 |
| 211506_s_at | IL8       | 0.013437  | 0.001592 | 0.01581  |
| 211518_s_at | BMP4      | 0.007126  | 0.000835 | 0.009495 |
| 211527_x_at | VEGFA     | -0.0096   | 0.000532 | 0.006646 |
| 211528_x_at | HLA-G     | 0.009124  | 0.005998 | 0.044126 |
| 211529_x_at | HLA-G     | 0.010139  | 0.000709 | 0.008347 |
| 211542_x_at | RPS10     | 0.009651  | 1.98E-05 | 0.000463 |
| 211546_x_at | SNCA      | 0.006165  | 0.005885 | 0.043552 |
| 211548_s_at | HPGD      | -0.02585  | 3.09E-09 | 5.6E-07  |
| 211549_s_at | HPGD      | -0.01273  | 4.09E-06 | 0.000135 |
| 211552_s_at | ALDH4A1   | -0.02609  | 2.47E-12 | 3.92E-09 |
| 211569_s_at | HADH      | -0.02443  | 1.95E-10 | 7.89E-08 |

|             |          |          |          |          |
|-------------|----------|----------|----------|----------|
| 211571_s_at | VCAN     | 0.033366 | 1.4E-06  | 5.74E-05 |
| 211581_x_at | LST1     | 0.017394 | 5.89E-06 | 0.000177 |
| 211582_x_at | LST1     | 0.020814 | 2.45E-07 | 1.46E-05 |
| 211597_s_at | HOPX     | 0.027041 | 1.79E-06 | 6.89E-05 |
| 211600_at   | PTPRO    | -0.00371 | 0.000783 | 0.009043 |
| 211615_s_at | LRPPRC   | -0.01032 | 1.28E-05 | 0.000326 |
| 211620_x_at | RUNX1    | 0.00944  | 0.001839 | 0.017852 |
| 211628_x_at | FTH1P5   | -0.0058  | 0.000814 | 0.009318 |
| 211630_s_at | GSS      | -0.00836 | 0.004046 | 0.032897 |
| 211633_x_at |          | 0.018231 | 1.72E-05 | 0.000415 |
| 211634_x_at | IGHM     | 0.024318 | 4.75E-05 | 0.000944 |
| 211635_x_at | IGHA1    | 0.017438 | 0.000295 | 0.004199 |
| 211637_x_at | IGHA1    | 0.022879 | 0.000604 | 0.00734  |
| 211639_x_at | IGHA1    | 0.015131 | 0.000208 | 0.003158 |
| 211640_x_at | IGHG1    | 0.019688 | 4.54E-06 | 0.000145 |
| 211641_x_at | IGHA1    | 0.015948 | 2.44E-05 | 0.000546 |
| 211643_x_at | IGK@     | 0.032997 | 1.59E-07 | 1.04E-05 |
| 211644_x_at | IGK@     | 0.040751 | 6.2E-07  | 3.1E-05  |
| 211645_x_at |          | 0.032371 | 1.67E-06 | 6.6E-05  |
| 211647_x_at | IGHG1    | 0.012269 | 0.001076 | 0.011631 |
| 211649_x_at | IGHA1    | 0.011792 | 2.22E-05 | 0.000505 |
| 211650_x_at | IGHA1    | 0.02015  | 0.000201 | 0.003068 |
| 211656_x_at | HLA-DQB1 | 0.012885 | 0.003444 | 0.02914  |
| 211662_s_at | VDAC2    | -0.00593 | 0.000324 | 0.004515 |
| 211663_x_at | PTGDS    | 0.011098 | 0.00094  | 0.010441 |
| 211673_s_at | MOCS1    | -0.0111  | 0.001066 | 0.011547 |
| 211676_s_at | IFNGR1   | 1.27E-02 | 0.007038 | 0.049306 |
| 211682_x_at | UGT2B28  | -0.01341 | 7.6E-06  | 0.000216 |
| 211702_s_at | USP32    | -0.00703 | 0.001802 | 0.017564 |
| 211704_s_at | SPIN2A   | 0.006226 | 0.00286  | 0.025113 |
| 211708_s_at | SCD      | -0.01136 | 0.003606 | 0.030162 |
| 211712_s_at | ANXA9    | -0.01647 | 7.32E-10 | 1.87E-07 |
| 211715_s_at | BDH1     | -0.01192 | 0.001685 | 0.01661  |
| 211719_x_at | FN1      | 0.013491 | 0.000178 | 0.002795 |
| 211725_s_at | BID      | 0.009685 | 0.000944 | 0.01047  |
| 211727_s_at | COX11    | -0.0074  | 0.003362 | 0.02862  |
| 211733_x_at | SCP2     | -0.00762 | 0.000146 | 0.002372 |
| 211734_s_at | FCER1A   | 0.027367 | 2.54E-06 | 9.18E-05 |
| 211737_x_at | PTN      | 0.01638  | 0.000685 | 0.008111 |
| 211742_s_at | EVI2B    | 0.024567 | 8.21E-07 | 3.86E-05 |
| 211755_s_at | ATP5F1   | -0.00844 | 5.1E-07  | 2.59E-05 |
| 211776_s_at | EPB41L3  | -0.01933 | 2.45E-11 | 1.95E-08 |
| 211778_s_at | OVOL2    | 0.008045 | 0.003124 | 0.026956 |
| 211791_s_at | KCNAB2   | -0.007   | 0.005335 | 0.040462 |
| 211794_at   | FYB      | 0.016776 | 3.32E-05 | 0.000705 |
| 211795_s_at | FYB      | 0.018614 | 2.21E-06 | 8.17E-05 |
| 211796_s_at | TRBC1    | 0.042611 | 1.36E-08 | 1.69E-06 |
| 211798_x_at | IGLJ3    | 0.019472 | 3.48E-05 | 0.00073  |
| 211799_x_at | HLA-C    | 0.008706 | 0.002098 | 0.019738 |

|             |          |           |          |          |
|-------------|----------|-----------|----------|----------|
| 211806_s_at | KCNJ15   | -0.01318  | 0.001102 | 0.011863 |
| 211813_x_at | DCN      | 1.54E-02  | 0.000556 | 0.006858 |
| 211820_x_at | GYP A    | -0.01223  | 0.001099 | 0.011844 |
| 211821_x_at | GYP A    | -0.01051  | 0.003649 | 0.030436 |
| 211829_s_at | GP ER    | -0.00609  | 0.006385 | 0.04589  |
| 211831_s_at | THPO     | -0.00941  | 0.004255 | 0.034112 |
| 211843_x_at | CYP3A7   | -1.76E-02 | 2.33E-05 | 0.000527 |
| 211845_at   | PVRL1    | -0.00484  | 0.002065 | 0.019502 |
| 211864_s_at | MYOF     | 1.28E-02  | 0.00017  | 0.002691 |
| 211868_x_at | IGHA1    | 0.006638  | 0.003847 | 0.031645 |
| 211871_x_at | GNB5     | -0.00934  | 0.001532 | 0.015363 |
| 211881_x_at | IGLJ3    | 0.019954  | 2.38E-05 | 0.000536 |
| 211882_x_at | FUT6     | -0.00779  | 0.001961 | 0.018755 |
| 211883_x_at | CEACAM1  | -0.00939  | 0.002389 | 0.021784 |
| 211885_x_at | FUT6     | -0.01152  | 0.000983 | 0.010817 |
| 211887_x_at | MSR1     | 0.012829  | 0.001876 | 0.018056 |
| 211890_x_at | CAPN3    | -0.0279   | 3.08E-08 | 3.06E-06 |
| 211896_s_at | DCN      | 0.016405  | 0.000578 | 0.007073 |
| 211902_x_at | TRD@     | 1.86E-02  | 9.89E-08 | 7.25E-06 |
| 211907_s_at | PARD6B   | -0.01178  | 5.72E-06 | 0.000173 |
| 211908_x_at | IGKV3-20 | 0.012826  | 0.000345 | 0.004726 |
| 211911_x_at | HLA-B    | 0.013975  | 0.002623 | 0.023472 |
| 211917_s_at | PRLR     | -0.02044  | 5.75E-08 | 4.88E-06 |
| 211918_x_at | PAPPA2   | 0.022634  | 5.78E-06 | 0.000175 |
| 211919_s_at | CXCR4    | 0.028039  | 1.2E-06  | 5.11E-05 |
| 211921_x_at | PTMA     | 0.00344   | 0.005603 | 0.041854 |
| 211922_s_at | CAT      | -0.01489  | 3.77E-05 | 0.000778 |
| 211925_s_at | PLCB1    | 0.01525   | 0.000654 | 0.00784  |
| 211931_s_at | HNRNPA3  | 0.005512  | 0.001983 | 0.018931 |
| 211932_at   | HNRNPA3  | 0.004999  | 0.000983 | 0.010817 |
| 211933_s_at | HNRNPA3  | 0.004483  | 0.005902 | 0.043655 |
| 211941_s_at | PEBP1    | -0.01252  | 0.002737 | 0.024332 |
| 211942_x_at | RPL13A   | 0.013931  | 0.002923 | 0.025557 |
| 211945_s_at | ITGB1    | 0.006995  | 0.000529 | 0.006621 |
| 211950_at   | UBR4     | -0.00711  | 0.001249 | 0.013101 |
| 211962_s_at | ZFP36L1  | 0.008144  | 2.63E-06 | 9.48E-05 |
| 211963_s_at | ARPC5    | 0.00969   | 0.001831 | 0.017783 |
| 211967_at   | TMEM123  | 0.013655  | 3.46E-05 | 0.000729 |
| 211970_x_at | ACTG1    | 0.003483  | 0.004194 | 0.033775 |
| 211971_s_at | LRPPRC   | -0.0107   | 1.02E-07 | 7.43E-06 |
| 211983_x_at | ACTG1    | 0.00357   | 0.002625 | 0.023472 |
| 211984_at   | CALM1    | -0.00945  | 0.002532 | 0.02287  |
| 211985_s_at | CALM1    | -0.00578  | 0.001672 | 0.016511 |
| 211986_at   | AHNAK    | 0.013335  | 4.97E-06 | 0.000155 |
| 211989_at   | SMARCE1  | 0.005894  | 0.000282 | 0.004062 |
| 211990_at   | HLA-DPA1 | 0.01984   | 0.001664 | 0.016443 |
| 211991_s_at | HLA-DPA1 | 0.024897  | 1.52E-06 | 6.13E-05 |
| 211999_at   | H3F3B    | 0.007122  | 1.04E-06 | 4.64E-05 |
| 212012_at   | PXDN     | 0.016198  | 3.55E-05 | 0.000741 |

|             |          |          |          |          |
|-------------|----------|----------|----------|----------|
| 212013_at   | PXDN     | 0.009908 | 0.002528 | 0.022853 |
| 212014_x_at | CD44     | 0.019183 | 3.64E-06 | 0.000123 |
| 212022_s_at | MKI67    | 0.012314 | 0.001003 | 0.010999 |
| 212036_s_at | PNN      | 0.00835  | 0.000767 | 0.008876 |
| 212038_s_at | VDAC1    | -0.0071  | 0.00047  | 0.005996 |
| 212044_s_at | RPL27A   | 0.007879 | 0.004537 | 0.035752 |
| 212051_at   | WIPF2    | -0.0082  | 0.001723 | 0.016918 |
| 212053_at   | PDXDC1   | -0.00911 | 0.000707 | 0.00833  |
| 212062_at   | ATP9A    | 0.009175 | 0.000695 | 0.008203 |
| 212063_at   | CD44     | 0.025157 | 7.86E-06 | 0.000221 |
| 212067_s_at | C1R      | 0.019127 | 4.56E-07 | 2.35E-05 |
| 212076_at   | MLL      | 0.00783  | 0.0049   | 0.037913 |
| 212078_s_at | MLL      | 0.007765 | 0.002772 | 0.024544 |
| 212082_s_at | MYL6     | 0.005173 | 0.002983 | 0.025965 |
| 212087_s_at | ERAL1    | -0.00696 | 0.002799 | 0.0247   |
| 212089_at   | LMNA     | 0.009145 | 0.00186  | 0.017999 |
| 212090_at   | GRINA    | -0.00805 | 0.005293 | 0.040172 |
| 212093_s_at | MTUS1    | -0.00722 | 0.000909 | 0.010142 |
| 212097_at   | CAV1     | 0.011449 | 0.001723 | 0.016918 |
| 212110_at   | SLC39A14 | -0.01125 | 0.002958 | 0.025798 |
| 212166_at   | XPO7     | -0.00818 | 1.58E-06 | 6.32E-05 |
| 212171_x_at | VEGFA    | -0.01071 | 0.000248 | 0.003643 |
| 212173_at   | AK2      | -0.00886 | 0.002672 | 0.023785 |
| 212174_at   | AK2      | -0.00999 | 0.000766 | 0.008866 |
| 212175_s_at | AK2      | -0.01165 | 8.24E-08 | 6.24E-06 |
| 212187_x_at | PTGDS    | 0.013983 | 0.004267 | 0.034167 |
| 212188_at   | KCTD12   | 0.007777 | 0.000766 | 0.008866 |
| 212192_at   | KCTD12   | 0.011295 | 0.001243 | 0.013052 |
| 212203_x_at | IFITM3   | 0.019744 | 3.4E-06  | 0.000117 |
| 212204_at   | TMEM87A  | 0.011234 | 5.27E-05 | 0.001035 |
| 212216_at   | PREPL    | -0.00884 | 0.000236 | 0.003501 |
| 212226_s_at | PPAP2B   | -0.01119 | 0.004506 | 0.035586 |
| 212228_s_at | COQ9     | -0.01118 | 0.00022  | 0.003301 |
| 212229_s_at | FBXO21   | -0.00968 | 0.003009 | 0.026168 |
| 212230_at   | PPAP2B   | -0.01081 | 4.78E-06 | 0.000149 |
| 212231_at   | FBXO21   | -0.01251 | 4.84E-07 | 2.47E-05 |
| 212242_at   | TUBA4A   | -0.00631 | 0.001034 | 0.011275 |
| 212252_at   | CAMKK2   | -0.0074  | 0.004615 | 0.036203 |
| 212285_s_at | AGRN     | 0.009215 | 0.003658 | 0.030494 |
| 212312_at   | BCL2L1   | -0.00923 | 5.66E-05 | 0.001097 |
| 212314_at   | SEL1L3   | 0.013088 | 0.005911 | 0.043686 |
| 212320_at   | TUBB     | 0.011348 | 0.000343 | 0.004711 |
| 212357_at   | FAM168A  | -0.00498 | 0.005343 | 0.040497 |
| 212359_s_at | KIAA0913 | -0.00808 | 0.000269 | 0.003904 |
| 212382_at   | TCF4     | 0.019049 | 1.24E-06 | 5.25E-05 |
| 212386_at   | TCF4     | 0.01415  | 6.22E-06 | 0.000185 |
| 212387_at   | TCF4     | 0.013055 | 3.72E-05 | 0.000769 |
| 212391_x_at | RPS3A    | 0.006249 | 9.05E-05 | 0.00161  |
| 212415_at   | SEPT6    | 0.011344 | 0.001686 | 0.016613 |



|             |          |          |          |          |
|-------------|----------|----------|----------|----------|
| 212419_at   | ZCCHC24  | 0.011241 | 0.000382 | 0.005123 |
| 212420_at   | ELF1     | 0.009106 | 0.000343 | 0.00471  |
| 212432_at   | GRPEL1   | -0.01348 | 5.46E-08 | 4.73E-06 |
| 212434_at   | GRPEL1   | -0.01596 | 4.09E-08 | 3.85E-06 |
| 212444_at   |          | 0.017934 | 0.000528 | 0.006616 |
| 212445_s_at | NEDD4L   | -0.00938 | 0.000184 | 0.002868 |
| 212447_at   | KBTBD2   | 0.007097 | 0.003078 | 0.026618 |
| 212448_at   | NEDD4L   | -0.01097 | 0.000282 | 0.004062 |
| 212456_at   | KIAA0664 | -0.01136 | 9.43E-09 | 1.27E-06 |
| 212459_x_at | SUCLG2   | -0.01592 | 1.07E-07 | 7.77E-06 |
| 212464_s_at | FN1      | 0.013713 | 0.00062  | 0.007506 |
| 212465_at   | SETD3    | -0.00811 | 3.19E-05 | 0.000686 |
| 212468_at   | SPAG9    | -0.00859 | 0.000473 | 0.006029 |
| 212470_at   | SPAG9    | -0.0121  | 1.52E-07 | 1E-05    |
| 212481_s_at | TPM4     | 0.010123 | 4.94E-05 | 0.000978 |
| 212489_at   | COL5A1   | 0.010671 | 0.001889 | 0.018158 |
| 212498_at   |          | -0.0059  | 0.00564  | 0.042036 |
| 212503_s_at | DIP2C    | -0.01647 | 1.61E-06 | 6.39E-05 |
| 212504_at   | DIP2C    | -0.0186  | 3.32E-05 | 0.000705 |
| 212510_at   | GPD1L    | -0.01333 | 7.7E-08  | 6.02E-06 |
| 212521_s_at | PDE8A    | -0.01008 | 0.000283 | 0.004062 |
| 212522_at   | PDE8A    | -0.00916 | 0.000129 | 0.002152 |
| 212531_at   | LCN2     | 0.021873 | 1.71E-05 | 0.000414 |
| 212543_at   | AIM1     | -0.00738 | 0.00518  | 0.039477 |
| 212558_at   | SPRY1    | 0.014851 | 0.000176 | 0.002775 |
| 212568_s_at | DLAT     | -0.0145  | 2.09E-06 | 7.83E-05 |
| 212582_at   | OSBPL8   | -0.00787 | 0.001083 | 0.01169  |
| 212585_at   | OSBPL8   | -0.00754 | 0.004109 | 0.033215 |
| 212587_s_at | PTPRC    | 0.026406 | 5.41E-06 | 0.000165 |
| 212588_at   | PTPRC    | 0.023634 | 3.05E-07 | 1.74E-05 |
| 212590_at   | RRAS2    | -0.00737 | 0.002342 | 0.0215   |
| 212592_at   | IGJ      | 0.037135 | 4.38E-06 | 0.000142 |
| 212593_s_at | PDCD4    | 0.008718 | 9.48E-05 | 0.001672 |
| 212599_at   | AUTS2    | -0.01038 | 0.000964 | 0.010648 |
| 212600_s_at | UQCRC2   | -0.00619 | 0.005419 | 0.040908 |
| 212602_at   | WDFY3    | -0.00549 | 0.006186 | 0.045053 |
| 212609_s_at | AKT3     | 0.01034  | 1.67E-06 | 6.6E-05  |
| 212613_at   | BTN3A2   | 0.010314 | 0.000528 | 0.006616 |
| 212624_s_at | CHN1     | 0.010454 | 0.001477 | 0.014904 |
| 212639_x_at | TUBA1B   | 0.009871 | 0.000924 | 0.010284 |
| 212646_at   | RFTN1    | 0.01128  | 3.99E-05 | 0.000817 |
| 212647_at   | RRAS     | 0.01241  | 1.84E-05 | 0.000434 |
| 212650_at   | EHBP1    | -0.00569 | 0.000255 | 0.003728 |
| 212651_at   | RHOBTB1  | -0.01073 | 0.004064 | 0.033016 |
| 212653_s_at | EHBP1    | -0.00664 | 0.005707 | 0.042366 |
| 212656_at   | TSMF     | -0.0121  | 4.36E-08 | 4.01E-06 |
| 212657_s_at | IL1RN    | 1.21E-02 | 7.06E-05 | 0.001315 |
| 212667_at   | SPARC    | 0.009614 | 0.002206 | 0.020478 |
| 212669_at   | CAMK2G   | -0.01187 | 0.000571 | 0.007011 |

|             |          |           |          |          |
|-------------|----------|-----------|----------|----------|
| 212671_s_at | HLA-DQA1 | 0.029006  | 3.69E-05 | 0.000765 |
| 212681_at   | EPB41L3  | -0.01578  | 7.14E-07 | 3.45E-05 |
| 212683_at   | SLC25A44 | -0.00954  | 8.32E-05 | 0.001508 |
| 212688_at   | PIK3CB   | -0.00453  | 0.001701 | 0.016729 |
| 212701_at   | TLN2     | -0.02275  | 1.72E-07 | 1.1E-05  |
| 212703_at   | TLN2     | -0.02257  | 2.25E-09 | 4.37E-07 |
| 212706_at   | RASA4    | -0.0104   | 0.001541 | 0.015418 |
| 212713_at   | MFAP4    | 0.016836  | 0.000128 | 0.002132 |
| 212714_at   | LARP4    | -0.01306  | 4.07E-07 | 2.15E-05 |
| 212715_s_at | MICAL3   | -0.00912  | 0.004416 | 0.03505  |
| 212724_at   | RND3     | 0.010254  | 0.003197 | 0.027412 |
| 212731_at   | ANKRD46  | -0.00905  | 0.002378 | 0.021708 |
| 212741_at   | MAOA     | -0.02117  | 3.87E-10 | 1.28E-07 |
| 212750_at   | PPP1R16B | -0.03127  | 4.05E-10 | 1.28E-07 |
| 212757_s_at | CAMK2G   | -0.01166  | 0.000466 | 0.005966 |
| 212788_x_at | FTL      | -0.00758  | 0.001317 | 0.013689 |
| 212791_at   | C1orf216 | 0.010042  | 1.94E-05 | 0.000453 |
| 212796_s_at | TBC1D2B  | 0.008479  | 0.001334 | 0.013813 |
| 212805_at   | PRUNE2   | -0.00901  | 0.00495  | 0.038156 |
| 212806_at   | PRUNE2   | -0.01661  | 4.2E-05  | 0.000851 |
| 212809_at   | NFATC2IP | -0.00644  | 0.004552 | 0.035842 |
| 212814_at   | AHCYL2   | -0.01095  | 0.001212 | 0.012798 |
| 212827_at   | IGHM     | 0.01782   | 0.000196 | 0.003019 |
| 212832_s_at | CKAP5    | -0.00553  | 0.003727 | 0.030909 |
| 212833_at   | SLC25A46 | -0.00812  | 0.002343 | 0.0215   |
| 212836_at   | POLD3    | -0.01333  | 4.91E-05 | 0.000976 |
| 212844_at   | RRP1B    | 0.006022  | 0.003588 | 0.030072 |
| 212857_x_at | SUB1     | 0.004667  | 0.002975 | 0.025918 |
| 212865_s_at | COL14A1  | 0.023245  | 0.000133 | 0.002195 |
| 212873_at   | HMHA1    | 0.011734  | 0.000824 | 0.009393 |
| 212874_at   | APOE     | -0.01934  | 4.5E-08  | 4.07E-06 |
| 212883_at   | APOE     | -0.03368  | 1.09E-08 | 1.42E-06 |
| 212884_x_at | APOE     | -0.01554  | 5.18E-06 | 0.00016  |
| 212886_at   | CCDC69   | 0.007376  | 0.002197 | 0.020405 |
| 212894_at   | SUPV3L1  | -0.00879  | 0.000746 | 0.008675 |
| 212906_at   | GRAMD1B  | -0.02027  | 5.28E-08 | 4.61E-06 |
| 212907_at   | SLC30A1  | -0.008    | 0.00181  | 0.017628 |
| 212908_at   | DNAJC16  | -0.02412  | 2.44E-06 | 8.88E-05 |
| 212911_at   | DNAJC16  | -0.01189  | 5.87E-05 | 0.001127 |
| 212922_s_at | SMYD2    | 0.008285  | 0.001395 | 0.014272 |
| 212925_at   | C19orf21 | -0.00632  | 0.005058 | 0.0388   |
| 212946_at   | KIAA0564 | -1.25E-02 | 0.000184 | 0.002868 |
| 212950_at   | GPR116   | -0.01016  | 0.00417  | 0.033646 |
| 212967_x_at | NAP1L1   | 0.009392  | 2.9E-07  | 1.68E-05 |
| 212988_x_at | ACTG1    | 0.004458  | 0.001216 | 0.012821 |
| 212992_at   | AHNAK2   | 0.010613  | 8.72E-05 | 0.00156  |
| 212993_at   | NACC2    | -0.00687  | 0.002119 | 0.019867 |
| 212998_x_at | HLA-DQB1 | 0.019619  | 0.000187 | 0.002897 |
| 213002_at   | MARCKS   | 0.014815  | 1.29E-06 | 5.41E-05 |

|             |          |          |          |          |
|-------------|----------|----------|----------|----------|
| 213005_s_at | KANK1    | -0.00829 | 0.002669 | 0.023768 |
| 213012_at   | NEDD4    | -0.00781 | 0.002269 | 0.020969 |
| 213028_at   | NFRKB    | -0.00587 | 0.005585 | 0.041763 |
| 213029_at   | NFIB     | -0.00727 | 0.001449 | 0.014689 |
| 213033_s_at | NFIB     | -0.00994 | 1E-05    | 0.000269 |
| 213036_x_at | ATP2A3   | 0.009101 | 0.00057  | 0.007004 |
| 213037_x_at | STAU1    | -0.01094 | 3.52E-07 | 1.92E-05 |
| 213045_at   | MAST3    | -0.00925 | 0.000711 | 0.00836  |
| 213055_at   | CD47     | 0.011085 | 0.004108 | 0.033215 |
| 213095_x_at | AIF1     | 0.013522 | 0.000568 | 0.006991 |
| 213101_s_at | ACTR3    | 0.007885 | 0.000399 | 0.005306 |
| 213102_at   | ACTR3    | 0.010414 | 0.00251  | 0.022728 |
| 213113_s_at | SLC43A3  | 0.011874 | 4.71E-06 | 0.000148 |
| 213129_s_at | GCSH     | -0.00954 | 0.000144 | 0.002347 |
| 213132_s_at | MCAT     | -0.01046 | 0.000323 | 0.004514 |
| 213133_s_at | GCSH     | -0.0114  | 1.73E-06 | 6.79E-05 |
| 213136_at   | PTPN2    | 0.009358 | 0.001548 | 0.015474 |
| 213140_s_at | SS18L1   | -0.0131  | 3.61E-06 | 0.000122 |
| 213143_at   | C2orf72  | -0.00653 | 0.004612 | 0.036201 |
| 213149_at   | DLAT     | -0.01102 | 7.2E-05  | 0.001338 |
| 213151_s_at | SEPT7    | 0.008649 | 0.001063 | 0.011528 |
| 213176_s_at | LTBP4    | 0.006235 | 0.003916 | 0.032094 |
| 213180_s_at | GOSR2    | -0.00993 | 0.003444 | 0.02914  |
| 213181_s_at | MOCS1    | -0.00908 | 0.000393 | 0.005246 |
| 213193_x_at | TRBC1    | 0.036959 | 1.43E-08 | 1.75E-06 |
| 213194_at   | ROBO1    | 0.011345 | 0.002976 | 0.025918 |
| 213210_at   | TAF6L    | -0.00775 | 0.004804 | 0.037328 |
| 213214_x_at | ACTG1    | 0.002729 | 0.006286 | 0.045462 |
| 213221_s_at | SIK2     | -0.00761 | 0.000195 | 0.003008 |
| 213247_at   | SVPE1    | 0.012285 | 0.003631 | 0.030325 |
| 213262_at   | SACS     | 0.013183 | 0.000342 | 0.004704 |
| 213263_s_at | PCBP2    | -0.00978 | 0.004315 | 0.03445  |
| 213264_at   | PCBP2    | -0.01251 | 1.69E-09 | 3.58E-07 |
| 213274_s_at | CTSB     | -0.01604 | 8.44E-05 | 0.001528 |
| 213275_x_at | CTSB     | -0.00946 | 0.000141 | 0.002305 |
| 213282_at   | APOOL    | -0.00893 | 8.46E-05 | 0.001531 |
| 213289_at   | APOOL    | -0.01328 | 0.001562 | 0.015575 |
| 213293_s_at | TRIM22   | 0.019425 | 1.42E-06 | 5.83E-05 |
| 213308_at   | SHANK2   | -0.00661 | 0.00469  | 0.036669 |
| 213332_at   | PAPPA2   | 0.025225 | 2.79E-08 | 2.84E-06 |
| 213338_at   | TMEM158  | 0.007513 | 0.003836 | 0.031594 |
| 213362_at   | PTPRD    | -0.0089  | 0.000296 | 0.004213 |
| 213365_at   | ERI2     | -0.0128  | 8.46E-06 | 0.000235 |
| 213366_x_at | ATP5C1   | -0.00764 | 5.18E-05 | 0.00102  |
| 213374_x_at | HIBCH    | -0.01954 | 1.39E-10 | 6.52E-08 |
| 213377_x_at | RPS12    | 0.010714 | 8.34E-08 | 6.27E-06 |
| 213381_at   | C10orf72 | -0.01749 | 0.000332 | 0.004603 |
| 213383_at   | SBF1     | -0.0103  | 3.72E-05 | 0.000769 |
| 213385_at   | CHN2     | -0.01002 | 0.002607 | 0.023352 |

|             |          |           |          |          |
|-------------|----------|-----------|----------|----------|
| 213407_at   | PHLPP2   | -0.00874  | 0.00613  | 0.044829 |
| 213408_s_at | PI4KA    | -0.00723  | 0.000538 | 0.006699 |
| 213414_s_at | RPS19    | 0.012461  | 0.006257 | 0.045415 |
| 213418_at   | HSPA6    | 0.016291  | 0.004638 | 0.036293 |
| 213423_x_at | TUSC3    | 0.013125  | 0.000331 | 0.004596 |
| 213430_at   | RUFY3    | -0.0096   | 8.44E-05 | 0.001528 |
| 213437_at   | RUFY3    | -0.01178  | 0.003728 | 0.030909 |
| 213440_at   | RAB1A    | -0.00841  | 2.84E-06 | 0.0001   |
| 213448_at   |          | -0.01026  | 0.004456 | 0.035278 |
| 213454_at   | APITD1   | -0.01375  | 8.34E-07 | 3.9E-05  |
| 213475_s_at | ITGAL    | 0.009619  | 0.002633 | 0.023506 |
| 213483_at   | PPWD1    | 0.006227  | 0.006556 | 0.046825 |
| 213488_at   | SNED1    | 0.009405  | 0.001904 | 0.018277 |
| 213501_at   | ACOX1    | -0.01596  | 1.98E-06 | 7.51E-05 |
| 213503_x_at | ANXA2    | 0.018378  | 9.27E-08 | 6.87E-06 |
| 213504_at   | COPS6    | -0.01046  | 8.6E-05  | 0.001547 |
| 213509_x_at | CES2     | -0.01864  | 1.24E-05 | 0.000317 |
| 213511_s_at | MTMR1    | -0.006    | 0.006979 | 0.049027 |
| 213513_x_at | ARPC2    | 0.006821  | 3.29E-05 | 0.000702 |
| 213524_s_at | G0S2     | -0.01424  | 1.48E-07 | 9.88E-06 |
| 213535_s_at | UBE2I    | 0.004852  | 0.004365 | 0.034764 |
| 213539_at   | CD3D     | 0.022376  | 1.3E-06  | 5.43E-05 |
| 213541_s_at | ERG      | 0.011084  | 0.000672 | 0.007992 |
| 213552_at   | GLCE     | -0.00768  | 0.005415 | 0.040894 |
| 213558_at   | PCLO     | -0.01109  | 0.002603 | 0.023331 |
| 213563_s_at | TUBGCP2  | -0.00473  | 0.004834 | 0.0375   |
| 213564_x_at | LDHB     | -0.00508  | 3.47E-05 | 0.000729 |
| 213566_at   | RNASE6   | 0.022964  | 9.52E-08 | 7E-06    |
| 213587_s_at | ATP6V0E2 | -0.01657  | 5.27E-07 | 2.66E-05 |
| 213591_at   | ALDH7A1  | -0.01173  | 0.000413 | 0.00544  |
| 213603_s_at | RAC2     | 0.025289  | 3.09E-11 | 2.15E-08 |
| 213616_at   | C18orf10 | 0.008939  | 0.001518 | 0.015253 |
| 213618_at   | ARAP2    | 1.10E-02  | 0.001572 | 0.015655 |
| 213620_s_at | ICAM2    | 0.008287  | 0.003523 | 0.029663 |
| 213624_at   | SMPDL3A  | -0.01833  | 4.84E-09 | 7.71E-07 |
| 213626_at   | CBR4     | -0.01003  | 2.86E-06 | 0.000101 |
| 213642_at   |          | 0.005337  | 0.003351 | 0.028557 |
| 213646_x_at | TUBA1B   | 0.008227  | 0.001855 | 0.017968 |
| 213651_at   | INPP5J   | -0.00694  | 0.002342 | 0.0215   |
| 213657_s_at |          | -0.02409  | 3.77E-11 | 2.33E-08 |
| 213658_at   |          | -0.0152   | 7.76E-05 | 0.001425 |
| 213662_at   |          | 0.005058  | 0.002755 | 0.024431 |
| 213664_at   | SLC1A1   | -0.01814  | 1.58E-06 | 6.32E-05 |
| 213667_at   | SRCAP    | 0.004518  | 0.004076 | 0.033067 |
| 213671_s_at | MARS     | 0.005391  | 0.00422  | 0.033901 |
| 213674_x_at | IGHD     | 0.015105  | 9.76E-05 | 0.001713 |
| 213686_at   | VPS13A   | -9.22E-03 | 0.005684 | 0.042279 |
| 213687_s_at | RPL35A   | 0.006168  | 0.000649 | 0.007799 |
| 213692_s_at | VDR      | -0.012    | 0.001054 | 0.011446 |

|             |              |          |          |          |
|-------------|--------------|----------|----------|----------|
| 213693_s_at | MUC1         | 0.013585 | 0.000387 | 0.005176 |
| 213697_at   | HIPK3        | -0.00758 | 0.003148 | 0.027115 |
| 213703_at   | LOC150759    | 0.012796 | 0.001871 | 0.018041 |
| 213705_at   | LOC100509558 | -0.0122  | 6.07E-09 | 8.95E-07 |
| 213706_at   | GPD1         | -0.02591 | 3.65E-06 | 0.000123 |
| 213709_at   | BHLHB9       | -0.00736 | 0.002555 | 0.023021 |
| 213724_s_at | PDK2         | -0.02    | 3.72E-06 | 0.000124 |
| 213736_at   | COX5B        | -0.00648 | 0.0066   | 0.047028 |
| 213738_s_at | ATP5A1       | -0.00924 | 2.13E-06 | 7.94E-05 |
| 213748_at   | TRIM66       | -0.00694 | 0.003977 | 0.032523 |
| 213759_at   | ARL4C        | 0.013408 | 0.000312 | 0.004382 |
| 213760_s_at | ZNF330       | -0.00856 | 0.000199 | 0.00304  |
| 213766_x_at | GNA11        | -0.00787 | 0.00063  | 0.007598 |
| 213792_s_at | INSR         | -0.01491 | 9.7E-06  | 0.000263 |
| 213797_at   | RSAD2        | 0.012333 | 0.000688 | 0.008132 |
| 213800_at   | CFH          | 0.019365 | 2.72E-05 | 0.000599 |
| 213801_x_at | RPSA         | 0.008004 | 8.81E-06 | 0.000243 |
| 213813_x_at |              | -0.00699 | 1.82E-05 | 0.000431 |
| 213816_s_at | MET          | 0.013325 | 0.001446 | 0.014673 |
| 213823_at   | HOXA11       | 0.010783 | 0.000384 | 0.005141 |
| 213834_at   | IQSEC3       | -0.00771 | 0.00349  | 0.029437 |
| 213839_at   | CLMN         | -0.01048 | 5.54E-05 | 0.001077 |
| 213843_x_at | SLC6A8       | -0.01283 | 0.006867 | 0.048428 |
| 213857_s_at | CD47         | 0.012699 | 7.04E-06 | 0.000204 |
| 213859_x_at | SMARCA5      | 0.004492 | 0.006672 | 0.047441 |
| 213861_s_at | FAM119B      | -0.01722 | 5.58E-06 | 0.00017  |
| 213864_s_at | NAP1L1       | 0.00921  | 3.05E-08 | 3.04E-06 |
| 213869_x_at | THY1         | -0.01623 | 0.000102 | 0.001767 |
| 213874_at   | SERPINA4     | -0.00864 | 0.005696 | 0.042322 |
| 213891_s_at | TCF4         | 0.01221  | 0.003397 | 0.028882 |
| 213915_at   | NKG7         | 0.009744 | 0.000323 | 0.004514 |
| 213919_at   | DNAJC4       | -0.00573 | 0.006358 | 0.045801 |
| 213921_at   | SST          | 0.015795 | 1.45E-05 | 0.000363 |
| 213923_at   | RAP2B        | 0.012707 | 3.49E-05 | 0.00073  |
| 213932_x_at | HLA-A        | 0.005358 | 0.000566 | 0.006972 |
| 213933_at   | PTGER3       | -0.02503 | 7.72E-11 | 4.3E-08  |
| 213940_s_at | FNBP1        | 0.009037 | 9.43E-06 | 0.000258 |
| 213964_x_at |              | -0.00735 | 0.002117 | 0.019865 |
| 213967_at   | RALYL        | -0.02634 | 1.28E-06 | 5.37E-05 |
| 213975_s_at | LYZ          | 0.033254 | 6.75E-07 | 3.29E-05 |
| 213992_at   | COL4A6       | -0.01247 | 0.003838 | 0.031594 |
| 213994_s_at | SPON1        | 0.018878 | 0.000654 | 0.00784  |
| 214000_s_at | RGS10        | 0.024402 | 2.17E-07 | 1.34E-05 |
| 214001_x_at |              | 0.006367 | 0.000271 | 0.003918 |
| 214003_x_at | RPS20        | 0.002781 | 0.006029 | 0.04428  |
| 214013_s_at | TBC1D1       | -0.00954 | 0.000121 | 0.002043 |
| 214016_s_at | LOC100506168 | 0.006731 | 0.003771 | 0.031175 |
| 214022_s_at | IFITM1       | 0.024832 | 2.4E-07  | 1.45E-05 |
| 214031_s_at | KRT7         | 0.016462 | 0.000461 | 0.00591  |

|             |              |          |          |          |
|-------------|--------------|----------|----------|----------|
| 214033_at   | ABCC6        | -0.02183 | 6.62E-08 | 5.4E-06  |
| 214036_at   | EFNA5        | 1.26E-02 | 0.000308 | 0.004351 |
| 214039_s_at | LAPTM4B      | 0.008721 | 0.000843 | 0.00955  |
| 214043_at   | PTPRD        | -0.01093 | 0.000358 | 0.004866 |
| 214045_at   | LIAS         | -0.00962 | 0.001458 | 0.014765 |
| 214051_at   | TMSB15B      | 0.013169 | 4.29E-05 | 0.000866 |
| 214053_at   | ERBB4        | 0.011608 | 0.005704 | 0.042365 |
| 214069_at   | ACSM2A       | -0.01983 | 5.7E-05  | 0.001102 |
| 214085_x_at | GLIPR1       | 0.007765 | 0.002005 | 0.019063 |
| 214088_s_at | FUT3         | -0.02154 | 1.95E-08 | 2.2E-06  |
| 214091_s_at | GPX3         | -0.00895 | 4.56E-06 | 0.000145 |
| 214095_at   | SHMT2        | -0.01131 | 0.000358 | 0.004872 |
| 214104_at   | GPR161       | 0.006916 | 0.000459 | 0.005891 |
| 214116_at   |              | -0.00918 | 0.003634 | 0.030342 |
| 214129_at   | PDE4DIP      | -0.00599 | 0.00329  | 0.028091 |
| 214143_x_at | RPL24        | 0.004012 | 0.006383 | 0.04589  |
| 214155_s_at | LARP4        | -0.00953 | 0.000701 | 0.008267 |
| 214156_at   | MYRIP        | -0.01077 | 0.004037 | 0.032885 |
| 214164_x_at | CA12         | -0.00729 | 0.002227 | 0.020649 |
| 214170_x_at | FH           | -0.01175 | 3.23E-08 | 3.12E-06 |
| 214175_x_at | PDLIM4       | 0.009545 | 0.003358 | 0.02861  |
| 214179_s_at | NFE2L1       | -0.00628 | 0.006751 | 0.047834 |
| 214180_at   | MAN1C1       | -0.00788 | 0.00528  | 0.040089 |
| 214181_x_at | LST1         | 0.020906 | 2.45E-06 | 8.91E-05 |
| 214189_s_at | GGA2         | -0.00805 | 0.002455 | 0.022304 |
| 214190_x_at | GGA2         | -0.00775 | 0.002857 | 0.025113 |
| 214203_s_at | PRODH        | -0.01779 | 3.25E-08 | 3.12E-06 |
| 214204_at   | PACRG        | -0.0069  | 0.006599 | 0.047028 |
| 214214_s_at | C1QBP        | -0.00895 | 0.000125 | 0.002095 |
| 214219_x_at | MAP4K1       | 0.012085 | 3.44E-05 | 0.000726 |
| 214231_s_at | KIAA0564     | -0.0142  | 2.18E-07 | 1.34E-05 |
| 214234_s_at | CYP3A5       | -0.01356 | 0.001637 | 0.016206 |
| 214236_at   | LOC100286895 | 0.009486 | 0.005705 | 0.042365 |
| 214247_s_at | DKK3         | 0.016879 | 7.73E-05 | 0.001423 |
| 214259_s_at | AKR7A2       | -0.01071 | 0.000116 | 0.001969 |
| 214261_s_at | ADH6         | -0.02231 | 2E-09    | 4.02E-07 |
| 214268_s_at | MTMR4        | -0.00949 | 8.32E-05 | 0.001508 |
| 214274_s_at | ACAA1        | -0.02366 | 3.49E-13 | 1.29E-09 |
| 214277_at   | COX11        | -0.0129  | 0.001463 | 0.014798 |
| 214285_at   | FABP3        | -0.01026 | 0.00456  | 0.035897 |
| 214298_x_at | SEPT6        | 0.008485 | 0.002158 | 0.020156 |
| 214307_at   | HGD          | -0.01238 | 4.8E-06  | 0.00015  |
| 214308_s_at | HGD          | -0.016   | 9.63E-05 | 0.001692 |
| 214321_at   | NOV          | 0.021609 | 4.73E-08 | 4.24E-06 |
| 214329_x_at | TNFSF10      | 0.011948 | 0.000276 | 0.003987 |
| 214331_at   | TSFM         | -0.00881 | 0.001323 | 0.013735 |
| 214332_s_at | TSFM         | -0.01274 | 6.97E-06 | 0.000202 |
| 214339_s_at | MAP4K1       | 0.010169 | 0.00024  | 0.003555 |
| 214342_at   | ATXN7L1      | -0.01373 | 1.74E-05 | 0.000418 |

|             |          |           |          |          |
|-------------|----------|-----------|----------|----------|
| 214343_s_at | ATXN7L1  | -0.01417  | 0.000222 | 0.00333  |
| 214347_s_at | DDC      | -0.02313  | 1.68E-05 | 0.000407 |
| 214365_at   | TPM3     | 0.006374  | 0.006766 | 0.047899 |
| 214369_s_at | RASGRP2  | 0.009207  | 0.002133 | 0.019977 |
| 214389_at   | SLC5A12  | -0.02918  | 3.82E-07 | 2.05E-05 |
| 214423_x_at | ALDOB    | -0.02581  | 1.78E-06 | 6.89E-05 |
| 214424_s_at | ALDOB    | -0.03739  | 9.95E-07 | 4.48E-05 |
| 214433_s_at | SELENBP1 | -0.02072  | 3.14E-11 | 2.15E-08 |
| 214434_at   | HSPA12A  | -0.01512  | 3.72E-08 | 3.52E-06 |
| 214437_s_at | SHMT2    | -0.01017  | 0.00253  | 0.022862 |
| 214438_at   | HLX      | 7.77E-03  | 0.002794 | 0.024673 |
| 214439_x_at | BIN1     | -0.01162  | 0.000185 | 0.002875 |
| 214440_at   | NAT1     | -0.00876  | 0.003032 | 0.026276 |
| 214447_at   | ETS1     | 0.0077    | 0.004019 | 0.032772 |
| 214452_at   | BCAT1    | 0.013302  | 0.001951 | 0.018676 |
| 214453_s_at | IFI44    | 0.021664  | 1.41E-07 | 9.58E-06 |
| 214456_x_at | SAA1     | 0.014827  | 2.75E-05 | 0.000603 |
| 214459_x_at | HLA-C    | 0.010664  | 0.001067 | 0.011555 |
| 214467_at   | GPR65    | 0.009811  | 0.005486 | 0.041205 |
| 214470_at   | KLRB1    | 0.019954  | 2.58E-07 | 1.53E-05 |
| 214475_x_at | CAPN3    | -2.72E-02 | 4.39E-08 | 4.03E-06 |
| 214490_at   | ARSF     | -0.02097  | 1.73E-07 | 1.1E-05  |
| 214493_s_at | INADL    | -0.00721  | 0.000946 | 0.010483 |
| 214505_s_at | FHL1     | 0.015681  | 0.002739 | 0.024342 |
| 214511_x_at | FCGR1B   | 0.00961   | 0.004235 | 0.034011 |
| 214512_s_at | SUB1     | 0.00728   | 0.001843 | 0.017871 |
| 214533_at   | CMA1     | 0.007139  | 0.006337 | 0.045713 |
| 214537_at   | HIST1H1D | 0.014411  | 5.63E-05 | 0.001092 |
| 214545_s_at | PROSC    | -0.01197  | 0.00084  | 0.009534 |
| 214560_at   | FPR3     | 0.017013  | 0.000289 | 0.004133 |
| 214567_s_at | XCL1     | 0.013398  | 0.000404 | 0.005349 |
| 214574_x_at | LST1     | 0.021714  | 1.15E-06 | 4.97E-05 |
| 214581_x_at | TNFRSF21 | -0.01228  | 0.001813 | 0.017641 |
| 214583_at   | DDI2     | -0.00749  | 0.000567 | 0.006976 |
| 214587_at   | COL8A1   | 0.010844  | 0.000378 | 0.005096 |
| 214596_at   | CHRM3    | -0.01332  | 0.000907 | 0.010131 |
| 214597_at   | SSTR2    | -0.01253  | 0.000599 | 0.00729  |
| 214598_at   | CLDN8    | -0.01058  | 0.004425 | 0.035078 |
| 214617_at   | PRF1     | 0.011695  | 4.69E-05 | 0.000936 |
| 214651_s_at | HOXA10   | -0.00702  | 0.006896 | 0.048567 |
| 214669_x_at | IGKC     | 0.033301  | 1.14E-05 | 0.000297 |
| 214677_x_at | IGLV1-44 | 0.03495   | 8.6E-05  | 0.001547 |
| 214681_at   | GK       | -0.02082  | 1.61E-07 | 1.04E-05 |
| 214686_at   | ZNF266   | 0.011387  | 0.000968 | 0.010682 |
| 214696_at   | C17orf91 | -0.01728  | 1.07E-07 | 7.75E-06 |
| 214697_s_at | ROD1     | 0.010153  | 0.003287 | 0.028077 |
| 214701_s_at | FN1      | 0.014153  | 0.001101 | 0.011855 |
| 214719_at   | SLC46A3  | -0.00699  | 0.000517 | 0.006509 |
| 214723_x_at | ANKRD36  | 0.014034  | 0.00187  | 0.018041 |

|             |                 |          |          |          |
|-------------|-----------------|----------|----------|----------|
| 214724_at   | DIXDC1          | -0.00903 | 0.00108  | 0.011672 |
| 214748_at   | N4BP2L2         | -0.00696 | 0.00635  | 0.045781 |
| 214749_s_at | ARMCX6          | 0.009407 | 7.64E-05 | 0.00141  |
| 214755_at   | UAP1L1          | -0.01261 | 4.59E-05 | 0.000918 |
| 214763_at   | ACOT11          | -0.01687 | 2.6E-07  | 1.53E-05 |
| 214766_s_at | AHCTF1          | -0.00536 | 0.004358 | 0.034737 |
| 214767_s_at | HSPB6           | 0.01898  | 0.001564 | 0.015592 |
| 214768_x_at | IGKV1-5         | 0.024623 | 2.41E-05 | 0.000541 |
| 214776_x_at | XYLB            | -0.02156 | 1.89E-08 | 2.16E-06 |
| 214777_at   | IGKV4-1         | 0.022816 | 3.7E-06  | 0.000124 |
| 214786_at   | MAP3K1          | 0.009374 | 0.004505 | 0.035585 |
| 214791_at   | SP140L          | 0.016114 | 8.31E-05 | 0.001508 |
| 214797_s_at | CDK18           | -0.01025 | 0.000242 | 0.00358  |
| 214798_at   | ATP2C2          | -0.00622 | 0.00301  | 0.026168 |
| 214807_at   |                 | -0.0082  | 0.003097 | 0.026762 |
| 214827_at   | PARD6B          | -0.00997 | 1.27E-05 | 0.000322 |
| 214829_at   | AASS            | -0.01417 | 0.000898 | 0.01005  |
| 214832_at   | HNF4A           | -0.01947 | 1.06E-05 | 0.000281 |
| 214836_x_at | IGK@            | 0.025187 | 0.000102 | 0.00177  |
| 214842_s_at |                 | -0.02678 | 0.000552 | 0.006819 |
| 214844_s_at | DOK5            | 0.013569 | 0.000296 | 0.004213 |
| 214851_at   | HNF4A           | -0.01024 | 0.00548  | 0.041205 |
| 214864_s_at | GRHPR           | -0.01516 | 1.14E-07 | 8.18E-06 |
| 214869_x_at | GAPVD1          | -0.00903 | 0.000157 | 0.002515 |
| 214883_at   | THRA            | -0.00644 | 0.003078 | 0.026618 |
| 214905_at   | RASGRF1         | -0.00455 | 0.004425 | 0.035078 |
| 214910_s_at | APOM            | -0.02435 | 5.34E-05 | 0.001046 |
| 214916_x_at | IGHA1           | 0.021803 | 6.59E-06 | 0.000193 |
| 214919_s_at | ANKHD1-EIF4EBP3 | -0.00772 | 0.003539 | 0.029743 |
| 214923_at   | ATP6V1D         | -0.01239 | 0.000738 | 0.008607 |
| 214927_at   | ITGBL1          | 0.015205 | 0.003108 | 0.026836 |
| 214944_at   | PHLPP2          | -0.00884 | 0.003835 | 0.031594 |
| 214973_x_at | IGHD            | 0.028696 | 2.75E-06 | 9.78E-05 |
| 214994_at   | APOBEC3F        | 0.007927 | 0.003979 | 0.032525 |
| 214999_s_at | RAB11FIP3       | -0.03374 | 9.22E-09 | 1.26E-06 |
| 215001_s_at | GLUL            | 0.004602 | 0.00556  | 0.041633 |
| 215005_at   | NECAB2          | -0.0189  | 9.41E-07 | 4.31E-05 |
| 215034_s_at | TM4SF1          | 0.011081 | 0.001361 | 0.014006 |
| 215035_at   | IGLV6-57        | 0.005949 | 0.006464 | 0.04633  |
| 215036_at   |                 | 0.017966 | 1.54E-05 | 0.000382 |
| 215038_s_at | SETD2           | -0.00785 | 0.002946 | 0.025713 |
| 215045_at   | CELF3           | -0.00882 | 9.42E-05 | 0.001663 |
| 215049_x_at | CD163           | 0.019645 | 2.5E-05  | 0.000555 |
| 215051_x_at | AIF1            | 0.013842 | 6.9E-05  | 0.001288 |
| 215073_s_at | NR2F2           | 0.007418 | 0.004844 | 0.037561 |
| 215076_s_at | COL3A1          | 0.023308 | 3.47E-05 | 0.000729 |
| 215088_s_at | SDHC            | -0.00463 | 0.000719 | 0.008426 |
| 215118_s_at | IGHA1           | 9.72E-03 | 0.00094  | 0.010441 |
| 215121_x_at | IGLC7           | 0.033172 | 2.04E-05 | 0.000474 |



|             |              |           |          |          |
|-------------|--------------|-----------|----------|----------|
| 215125_s_at | UGT1A1       | -0.01662  | 9.63E-06 | 0.000262 |
| 215126_at   |              | -0.01177  | 0.006754 | 0.047834 |
| 215128_at   |              | -0.00966  | 0.005143 | 0.039247 |
| 215176_x_at | IGK@         | 0.039226  | 3.99E-06 | 0.000131 |
| 215177_s_at | ITGA6        | -0.00764  | 0.001151 | 0.012263 |
| 215193_x_at | HLA-DRB1     | 0.016608  | 0.002186 | 0.02031  |
| 215195_at   | PRKCA        | -6.96E-03 | 0.006412 | 0.046015 |
| 215210_s_at | DLST         | -0.0152   | 1.73E-09 | 3.63E-07 |
| 215214_at   | IGL@         | 0.013676  | 0.002773 | 0.024544 |
| 215217_at   | IGKC         | 0.044013  | 7.65E-07 | 3.63E-05 |
| 215227_x_at | ACP1         | -0.00585  | 0.005424 | 0.040908 |
| 215239_x_at | ZNF273       | 0.006219  | 3.98E-05 | 0.000817 |
| 215274_at   | SLC12A3      | -0.01794  | 0.000149 | 0.002401 |
| 215286_s_at | PHTF2        | 0.008692  | 0.000652 | 0.007824 |
| 215300_s_at | FMO5         | -0.02198  | 4.69E-06 | 0.000148 |
| 215313_x_at | HLA-A        | 8.01E-03  | 0.001027 | 0.01121  |
| 215321_at   | RUNDC3B      | -0.00984  | 0.000381 | 0.005123 |
| 215363_x_at | FOLH1        | -0.02942  | 1.37E-07 | 9.43E-06 |
| 215379_x_at | IGLC7        | 0.027346  | 0.00018  | 0.002812 |
| 215382_x_at | LOC100507804 | 0.019183  | 4.25E-06 | 0.000139 |
| 215388_s_at | CFH          | 0.026286  | 3.22E-08 | 3.12E-06 |
| 215422_at   |              | -0.00921  | 0.000146 | 0.002372 |
| 215436_at   | HSDL2        | -0.01113  | 0.004379 | 0.034813 |
| 215450_at   | SNRPE        | 0.004353  | 0.001905 | 0.018278 |
| 215471_s_at | MAP7         | -0.01662  | 4.51E-07 | 2.33E-05 |
| 215490_at   | C1orf69      | -0.00695  | 0.006336 | 0.045713 |
| 215493_x_at | BTN2A1       | 0.0088    | 0.001693 | 0.016665 |
| 215535_s_at | AGPAT1       | -7.86E-03 | 0.002136 | 0.019997 |
| 215559_at   | ABCC6        | -2.22E-02 | 5.72E-08 | 4.88E-06 |
| 215565_at   |              | 0.011271  | 0.000843 | 0.00955  |
| 215603_x_at | GGT1         | -0.00973  | 0.001076 | 0.011631 |
| 215633_x_at | LST1         | 0.014522  | 2.81E-05 | 0.000615 |
| 215646_s_at | VCAN         | 0.038999  | 4.15E-07 | 2.18E-05 |
| 215649_s_at | MVK          | -0.00707  | 0.007074 | 0.049497 |
| 215672_s_at | AHCYL2       | -0.01375  | 0.000194 | 0.002996 |
| 215692_s_at | MPPED2       | -0.01225  | 0.000436 | 0.005682 |
| 215707_s_at | PRNP         | -0.01301  | 0.000537 | 0.006694 |
| 215719_x_at | FAS          | 0.02123   | 1.16E-08 | 1.48E-06 |
| 215726_s_at | CYB5A        | -0.0197   | 3.25E-12 | 4.26E-09 |
| 215739_s_at | TUBGCP3      | -0.00963  | 0.00557  | 0.041678 |
| 215758_x_at | ZNF93        | 0.006629  | 0.003128 | 0.026963 |
| 215772_x_at | SUCLG2       | -0.01679  | 3.02E-08 | 3.03E-06 |
| 215774_s_at | SUCLG2       | -0.01333  | 0.000688 | 0.008132 |
| 215783_s_at | ALPL         | -2.09E-02 | 1.07E-06 | 4.72E-05 |
| 215784_at   | CD1E         | 0.027374  | 1.1E-06  | 4.84E-05 |
| 215785_s_at | CYFIP2       | -0.01502  | 7.63E-07 | 3.63E-05 |
| 215792_s_at | DNAJC11      | -0.00761  | 0.000189 | 0.002923 |
| 215794_x_at | GLUD2        | -0.01334  | 8.1E-05  | 0.001477 |
| 215798_at   | ALDH1L1      | -0.00791  | 0.006326 | 0.045669 |

|             |           |           |          |          |
|-------------|-----------|-----------|----------|----------|
| 215867_x_at | CA12      | -0.00774  | 0.006755 | 0.047834 |
| 215891_s_at | GM2A      | 0.009619  | 0.007156 | 0.04999  |
| 215946_x_at | IGLL3P    | 0.016615  | 0.000619 | 0.0075   |
| 215949_x_at | IGHM      | 0.01029   | 0.00386  | 0.031716 |
| 215959_at   | PPFIBP2   | -0.01012  | 0.000332 | 0.004602 |
| 215966_x_at | GK3P      | -0.02241  | 2.33E-07 | 1.42E-05 |
| 215967_s_at | LY9       | 0.011856  | 0.000249 | 0.003659 |
| 215975_x_at |           | -0.01836  | 4.19E-05 | 0.00085  |
| 215977_x_at | GK        | -0.02241  | 1.06E-05 | 0.000281 |
| 216013_at   | ZXDB      | -0.00751  | 0.004284 | 0.03428  |
| 216024_at   | DNM2      | -0.0102   | 3.5E-06  | 0.000119 |
| 216036_x_at | WDTC1     | -0.00733  | 1.16E-05 | 0.000302 |
| 216092_s_at | SLC7A8    | -0.023    | 9.86E-07 | 4.45E-05 |
| 216179_x_at |           | -0.01178  | 5.98E-06 | 0.000179 |
| 216191_s_at | TRDV3     | 0.013702  | 0.000128 | 0.002127 |
| 216207_x_at | IGKC      | 0.027545  | 3.41E-06 | 0.000117 |
| 216212_s_at | DKC1      | 0.00676   | 0.004815 | 0.037404 |
| 216218_s_at | PLCL2     | -0.01136  | 0.001221 | 0.012861 |
| 216223_at   | CPN2      | -0.02602  | 9.63E-07 | 4.4E-05  |
| 216224_s_at | HDAC6     | -0.01233  | 2.3E-07  | 1.4E-05  |
| 216231_s_at | B2M       | 0.010411  | 0.004249 | 0.034085 |
| 216237_s_at | MCM5      | 0.00619   | 0.005514 | 0.041346 |
| 216252_x_at | FAS       | 0.016158  | 1.45E-06 | 5.94E-05 |
| 216308_x_at | GRHPR     | -0.01612  | 7.96E-07 | 3.76E-05 |
| 216316_x_at | GK        | -0.01475  | 0.000462 | 0.005916 |
| 216318_at   | IGHA1     | 0.015681  | 2.04E-06 | 7.67E-05 |
| 216320_x_at | MST1      | -1.19E-02 | 0.000552 | 0.006821 |
| 216342_x_at |           | 0.004843  | 0.000544 | 0.006749 |
| 216363_at   |           | 0.006118  | 0.005533 | 0.041473 |
| 216365_x_at | IGLV3-19  | 0.014067  | 7.24E-07 | 3.48E-05 |
| 216379_x_at | CD24      | 0.008907  | 0.000572 | 0.007013 |
| 216381_x_at | AKR7A3    | -0.02949  | 1.04E-11 | 1E-08    |
| 216384_x_at | LOC441454 | 0.005988  | 7.6E-05  | 0.001405 |
| 216394_x_at |           | 0.007909  | 0.002045 | 0.019371 |
| 216401_x_at |           | 0.018073  | 0.000112 | 0.001923 |
| 216412_x_at | IGLV1-40  | 0.007327  | 0.005687 | 0.042285 |
| 216425_at   |           | -0.01143  | 0.000672 | 0.007992 |
| 216438_s_at | TMSB4X    | 0.016109  | 4E-07    | 2.13E-05 |
| 216442_x_at | FN1       | 0.014721  | 0.000109 | 0.001873 |
| 216445_at   |           | 0.006364  | 0.003982 | 0.032528 |
| 216452_at   | TRPM3     | -0.01689  | 1.47E-08 | 1.79E-06 |
| 216474_x_at | TPSAB1    | 0.021383  | 6.94E-08 | 5.58E-06 |
| 216484_x_at | HDGF      | -0.00441  | 0.00708  | 0.049523 |
| 216485_s_at | TPSAB1    | 0.008709  | 0.003685 | 0.030677 |
| 216489_at   | TRPM3     | -0.01804  | 3.63E-06 | 0.000123 |
| 216491_x_at | IGHM      | 0.027078  | 7.51E-05 | 0.00139  |
| 216495_x_at |           | 0.008586  | 0.001692 | 0.01666  |
| 216505_x_at |           | 0.008103  | 0.000777 | 0.008976 |
| 216510_x_at | IGHA1     | 0.021001  | 8.22E-05 | 0.001495 |

|             |              |          |          |          |
|-------------|--------------|----------|----------|----------|
| 216515_x_at | MIR1244-1    | 0.007304 | 5.14E-06 | 0.00016  |
| 216526_x_at | HLA-C        | 0.010561 | 6.05E-06 | 0.000181 |
| 216541_x_at | IGHG1        | 0.009388 | 0.002928 | 0.025587 |
| 216542_x_at | IGHA1        | 0.026944 | 3.04E-06 | 0.000106 |
| 216557_x_at | IGHA1        | 0.02736  | 2.03E-05 | 0.000472 |
| 216560_x_at | IGL@         | 0.016087 | 5.76E-05 | 0.001111 |
| 216563_at   | ANKRD12      | 0.007427 | 0.000655 | 0.007845 |
| 216565_x_at |              | 0.01688  | 1.62E-07 | 1.05E-05 |
| 216566_at   |              | 0.010572 | 0.000933 | 0.010376 |
| 216576_x_at | IGK@         | 0.032491 | 6.52E-06 | 0.000192 |
| 216591_s_at | SDHC         | -0.01149 | 0.004198 | 0.033777 |
| 216599_x_at | SLC22A6      | -0.02675 | 2.89E-06 | 0.000101 |
| 216600_x_at | ALDOB        | -0.02441 | 4.24E-06 | 0.000138 |
| 216603_at   | SLC7A8       | -0.02432 | 0.001415 | 0.014413 |
| 216604_s_at | SLC7A8       | -0.0226  | 6.02E-06 | 0.00018  |
| 216609_at   | TXN          | -0.01081 | 5.08E-07 | 2.59E-05 |
| 216615_s_at | HTR3A        | -0.00536 | 0.006104 | 0.04466  |
| 216638_s_at | PRLR         | -0.02627 | 4.92E-08 | 4.37E-06 |
| 216696_s_at | PRODH2       | -0.02425 | 4.49E-05 | 0.000903 |
| 216708_x_at | LOC100287927 | 0.021876 | 2.64E-06 | 9.5E-05  |
| 216714_at   | CCL13        | 0.009518 | 0.001999 | 0.019019 |
| 216733_s_at | GATM         | -0.01834 | 5.43E-08 | 4.72E-06 |
| 216789_at   |              | -0.00632 | 0.006141 | 0.044883 |
| 216806_at   |              | 5.61E-03 | 0.002775 | 0.02455  |
| 216823_at   | RPS3A        | 0.008081 | 0.000316 | 0.004441 |
| 216829_at   | IGK@         | 0.006002 | 0.006776 | 0.047939 |
| 216834_at   | RGS1         | 0.018627 | 3.61E-05 | 0.000751 |
| 216835_s_at | DOK1         | 0.006821 | 0.001703 | 0.01674  |
| 216852_x_at | IGL@         | 0.01562  | 0.000145 | 0.00236  |
| 216853_x_at | IGLV3-19     | 0.012102 | 0.000201 | 0.003068 |
| 216865_at   | COL14A1      | 0.015695 | 1.31E-05 | 0.000332 |
| 216866_s_at | COL14A1      | 0.017553 | 4.2E-05  | 0.000851 |
| 216886_at   | CHRNA4       | -0.01442 | 1.5E-05  | 0.000372 |
| 216889_s_at | HNF4A        | -0.01633 | 7.8E-06  | 0.00022  |
| 216903_s_at | CBARA1       | -0.01515 | 7.17E-07 | 3.46E-05 |
| 216910_at   | XPNPEP2      | -0.0414  | 1.04E-08 | 1.36E-06 |
| 216954_x_at | ATP5O        | -0.00388 | 0.00304  | 0.026333 |
| 216958_s_at | IVD          | -0.00918 | 0.002026 | 0.019234 |
| 216962_at   | RPAIN        | -0.01232 | 6.6E-08  | 5.4E-06  |
| 216984_x_at | IGLV2-23     | 0.019857 | 3.96E-06 | 0.00013  |
| 216985_s_at | STX3         | -0.00918 | 0.001036 | 0.011277 |
| 217013_at   | AZGP1P1      | -0.00531 | 0.006898 | 0.04857  |
| 217014_s_at | AZGP1        | -0.0302  | 3.82E-06 | 0.000127 |
| 217022_s_at | IGHA1        | 0.041553 | 1.33E-06 | 5.52E-05 |
| 217023_x_at | TPSAB1       | 0.019624 | 5.21E-08 | 4.57E-06 |
| 217028_at   | CXCR4        | 0.027584 | 3.44E-07 | 1.9E-05  |
| 217036_at   |              | 0.016253 | 1.94E-05 | 0.000453 |
| 217053_x_at | ETV1         | 0.006605 | 0.004613 | 0.036201 |
| 217118_s_at | C22orf9      | 0.006968 | 0.003997 | 0.032643 |

|             |              |           |          |          |
|-------------|--------------|-----------|----------|----------|
| 217127_at   | CTH          | -0.01764  | 6.23E-06 | 0.000185 |
| 217138_x_at |              | 0.038576  | 1.74E-05 | 0.000418 |
| 217140_s_at | VDAC1        | -0.00891  | 6.5E-06  | 0.000191 |
| 217148_x_at |              | 0.032413  | 8.47E-07 | 3.95E-05 |
| 217157_x_at | IGK@         | 0.022781  | 4.45E-06 | 0.000143 |
| 217167_x_at | GK           | -0.02287  | 6.26E-07 | 3.11E-05 |
| 217179_x_at |              | 0.013424  | 0.000187 | 0.002897 |
| 217180_at   |              | 0.009166  | 0.000825 | 0.009395 |
| 217192_s_at | PRDM1        | 0.012812  | 0.000503 | 0.006363 |
| 217193_x_at |              | 0.010328  | 0.004032 | 0.032857 |
| 217222_at   | IGHG1        | 0.013881  | 0.002213 | 0.020525 |
| 217227_x_at | IGLV1-40     | 9.10E-03  | 0.001876 | 0.018056 |
| 217235_x_at | IGLL5        | 0.027613  | 1.43E-07 | 9.64E-06 |
| 217236_x_at | IGHA1        | 0.007449  | 0.001376 | 0.014123 |
| 217238_s_at | ALDOB        | -0.0247   | 9.45E-07 | 4.32E-05 |
| 217239_x_at | LOC100508797 | 0.012233  | 0.000505 | 0.006381 |
| 217248_s_at | SLC7A8       | -2.73E-02 | 1.19E-05 | 0.000308 |
| 217251_x_at |              | 0.023368  | 0.000151 | 0.002435 |
| 217257_at   | SH3BP2       | -0.02114  | 3.39E-09 | 5.95E-07 |
| 217258_x_at | IGLV1-40     | 0.013876  | 0.000155 | 0.00249  |
| 217260_x_at | IGHG1        | 0.028168  | 3.14E-06 | 0.000109 |
| 217281_x_at | IGHA1        | 0.025594  | 1.47E-05 | 0.000368 |
| 217288_at   |              | -0.01211  | 8.56E-05 | 0.001544 |
| 217313_at   |              | 0.005971  | 0.000797 | 0.009134 |
| 217319_x_at | CYP4A22      | -0.02287  | 5.29E-07 | 2.67E-05 |
| 217328_at   |              | 0.005639  | 0.00141  | 0.014373 |
| 217360_x_at | IGHA1        | 0.010864  | 0.000168 | 0.002671 |
| 217362_x_at | HLA-DRB6     | 0.013555  | 2.53E-05 | 0.000561 |
| 217369_at   | IGHG1        | 0.006731  | 0.004253 | 0.034108 |
| 217378_x_at |              | 0.026351  | 1.1E-05  | 0.000289 |
| 217388_s_at | KYNU         | -0.01646  | 0.000111 | 0.001893 |
| 217416_x_at |              | -0.00535  | 0.001783 | 0.01744  |
| 217418_x_at | MS4A1        | 0.022669  | 9.83E-05 | 0.001723 |
| 217419_x_at | AGRN         | 0.009223  | 0.004986 | 0.038369 |
| 217427_s_at | HIRA         | -0.01086  | 0.002273 | 0.020994 |
| 217456_x_at | HLA-E        | 8.25E-03  | 0.000921 | 0.010254 |
| 217478_s_at | HLA-DMA      | 0.013895  | 0.005363 | 0.040561 |
| 217480_x_at | IGKC         | 0.021136  | 5.98E-05 | 0.001144 |
| 217483_at   | FOLH1        | -0.02047  | 3.69E-07 | 2E-05    |
| 217487_x_at | FOLH1        | -0.01256  | 0.001659 | 0.016395 |
| 217496_s_at | IDE          | -0.00641  | 0.006914 | 0.048646 |
| 217503_at   | STK17B       | 0.018472  | 3.14E-05 | 0.000677 |
| 217512_at   | KNG1         | -0.02264  | 6.94E-07 | 3.36E-05 |
| 217513_at   | C17orf60     | 0.007289  | 0.003471 | 0.029298 |
| 217517_x_at | SRPK2        | 0.005723  | 0.003155 | 0.027154 |
| 217530_at   | SLC34A1      | -0.0256   | 3.93E-06 | 0.00013  |
| 217556_at   | CLCN4        | -0.00577  | 0.005024 | 0.03859  |
| 217583_at   | PAH          | -0.02261  | 8.45E-06 | 0.000235 |
| 217599_s_at | MDFIC        | 0.00592   | 0.006855 | 0.04836  |

|             |         |           |          |          |
|-------------|---------|-----------|----------|----------|
| 217606_at   |         | -7.13E-03 | 0.005238 | 0.039851 |
| 217612_at   | TIMM50  | -0.00836  | 0.005477 | 0.041205 |
| 217728_at   | S100A6  | 0.02462   | 9.2E-13  | 1.86E-09 |
| 217733_s_at | TMSB10  | 0.019686  | 4.4E-06  | 0.000142 |
| 217744_s_at | PERP    | 0.010744  | 0.001487 | 0.014971 |
| 217748_at   | ADIPOR1 | -0.00535  | 0.006187 | 0.045053 |
| 217751_at   | GSTK1   | -0.00836  | 0.00128  | 0.013378 |
| 217752_s_at | CNDP2   | -0.00756  | 1.1E-05  | 0.00029  |
| 217754_at   | DDX56   | -0.00761  | 0.000197 | 0.003021 |
| 217755_at   | HN1     | 0.010097  | 0.000285 | 0.004081 |
| 217757_at   | A2M     | 0.016045  | 3.02E-05 | 0.000656 |
| 217761_at   | ADI1    | -0.01371  | 3.29E-05 | 0.000701 |
| 217762_s_at | RAB31   | 0.0158    | 7.65E-06 | 0.000217 |
| 217763_s_at | RAB31   | 0.01174   | 0.00151  | 0.015182 |
| 217764_s_at | RAB31   | 0.012972  | 0.000712 | 0.008363 |
| 217767_at   | C3      | 0.026637  | 5.94E-06 | 0.000179 |
| 217772_s_at | MTCH2   | -0.01095  | 1.98E-06 | 7.51E-05 |
| 217775_s_at | RDH11   | -0.00718  | 0.000648 | 0.007793 |
| 217782_s_at | GPS1    | -0.00897  | 0.001606 | 0.015922 |
| 217788_s_at | GALNT2  | -8.90E-03 | 0.00164  | 0.016228 |
| 217792_at   | SNX5    | -0.00903  | 2.74E-05 | 0.000602 |
| 217794_at   | PRR13   | -0.00619  | 2.45E-05 | 0.000546 |
| 217796_s_at | NPLOC4  | -0.01042  | 0.000883 | 0.009921 |
| 217808_s_at | MAPKAP1 | -0.01365  | 2.7E-07  | 1.58E-05 |
| 217809_at   | BZW2    | 0.007175  | 0.002817 | 0.024842 |
| 217820_s_at | ENAH    | 9.85E-03  | 0.000977 | 0.010766 |
| 217830_s_at | NSFL1C  | -0.00623  | 0.007036 | 0.049306 |
| 217838_s_at | EVL     | 0.009942  | 0.000205 | 0.003115 |
| 217844_at   | CTDSP1  | -0.0078   | 0.002627 | 0.023474 |
| 217850_at   | GNL3    | 0.007983  | 0.000353 | 0.004816 |
| 217868_s_at | METTL9  | -0.00589  | 0.004694 | 0.036691 |
| 217874_at   | SUCLG1  | -0.01786  | 2.32E-11 | 1.91E-08 |
| 217889_s_at | CYBRD1  | 0.011739  | 0.00579  | 0.042937 |
| 217890_s_at | PARVA   | 0.008103  | 0.005974 | 0.043972 |
| 217895_at   | PTCD3   | -0.00614  | 0.002896 | 0.025351 |
| 217900_at   | IARS2   | -0.00763  | 0.000253 | 0.003703 |
| 217906_at   | KLHDC2  | -0.00815  | 0.000785 | 0.009051 |
| 217910_x_at | MLX     | -0.00571  | 0.005676 | 0.042247 |
| 217911_s_at | BAG3    | -0.01578  | 1.15E-05 | 0.0003   |
| 217912_at   | DUS1L   | -0.00799  | 0.000165 | 0.002636 |
| 217914_at   | TPCN1   | -0.01096  | 0.000319 | 0.004464 |
| 217931_at   | CNPY3   | 0.010917  | 0.000843 | 0.00955  |
| 217933_s_at | LAP3    | -0.00763  | 0.001109 | 0.011932 |
| 217939_s_at | AFTPH   | -0.006    | 0.00409  | 0.033101 |
| 217940_s_at | CARKD   | -0.00599  | 0.000348 | 0.004758 |
| 217942_at   | MRPS35  | -0.00743  | 0.002042 | 0.01935  |
| 217944_at   | POMGNT1 | -0.00705  | 0.000148 | 0.002389 |
| 217946_s_at | SAE1    | 0.005486  | 0.004433 | 0.035121 |
| 217947_at   | CMTM6   | 0.006481  | 0.003775 | 0.031191 |

|             |          |          |          |          |
|-------------|----------|----------|----------|----------|
| 217955_at   | BCL2L13  | -0.00848 | 0.00372  | 0.030898 |
| 217964_at   | TTC19    | -0.00692 | 0.000484 | 0.006149 |
| 217965_s_at | SAP30BP  | 0.008251 | 0.001266 | 0.013255 |
| 217966_s_at | FAM129A  | 0.021178 | 3.72E-07 | 2.01E-05 |
| 217967_s_at | FAM129A  | 1.57E-02 | 1.22E-05 | 0.000312 |
| 217973_at   | DCXR     | -0.02686 | 3.02E-10 | 1.1E-07  |
| 217977_at   | SEPX1    | -0.01749 | 7.38E-06 | 0.000211 |
| 217979_at   | TSPAN13  | 0.014781 | 0.00022  | 0.003297 |
| 217980_s_at | MRPL16   | -0.00672 | 0.001329 | 0.013779 |
| 217984_at   | RNASET2  | 0.012111 | 9.7E-06  | 0.000263 |
| 217985_s_at | BAZ1A    | 0.010472 | 0.00113  | 0.012114 |
| 217986_s_at | BAZ1A    | 0.012536 | 0.000481 | 0.006117 |
| 217988_at   | CCNB1IP1 | -0.00726 | 0.004335 | 0.034586 |
| 218003_s_at | FKBP3    | 0.004657 | 0.001137 | 0.012161 |
| 218019_s_at | PDXK     | -0.01022 | 0.001005 | 0.011013 |
| 218021_at   | DHRS4    | -0.02231 | 1.71E-05 | 0.000414 |
| 218024_at   | BRP44L   | -0.00919 | 0.000627 | 0.007576 |
| 218025_s_at | PECI     | -0.01634 | 1.59E-07 | 1.04E-05 |
| 218028_at   | ELOVL1   | 0.005699 | 0.003335 | 0.028442 |
| 218035_s_at | RBM47    | -0.00855 | 0.00063  | 0.007604 |
| 218066_at   | SLC12A7  | -0.00707 | 0.000546 | 0.006761 |
| 218071_s_at | MKRN2    | -0.00863 | 0.000427 | 0.00559  |
| 218084_x_at | FXYD5    | 0.019518 | 3.68E-05 | 0.000763 |
| 218086_at   | NPDC1    | 0.010039 | 0.000245 | 0.003619 |
| 218094_s_at | DBNDD2   | 0.012463 | 0.000172 | 0.002715 |
| 218098_at   | ARFGEF2  | -0.00576 | 0.002743 | 0.024354 |
| 218099_at   | TEX2     | -0.00961 | 0.000187 | 0.002897 |
| 218102_at   | DERA     | -0.0126  | 6.43E-08 | 5.34E-06 |
| 218116_at   | C9orf78  | -0.00622 | 0.000153 | 0.002468 |
| 218124_at   | RETSAT   | -0.01127 | 2.72E-06 | 9.72E-05 |
| 218126_at   | FAM82A2  | -0.00693 | 0.0026   | 0.023331 |
| 218145_at   | TRIB3    | 0.005734 | 0.005872 | 0.043476 |
| 218150_at   | ARL5A    | -0.00817 | 0.006528 | 0.046683 |
| 218157_x_at | CDC42SE1 | 0.012028 | 0.000254 | 0.003719 |
| 218162_at   | OLFML3   | 0.011677 | 0.000142 | 0.002322 |
| 218165_at   | MEAF6    | 0.007459 | 0.001175 | 0.012494 |
| 218167_at   | AMZ2     | -0.01017 | 2.54E-06 | 9.18E-05 |
| 218168_s_at | ADCK3    | -0.01    | 0.000548 | 0.006782 |
| 218170_at   | ISOC1    | -0.00852 | 0.000764 | 0.008858 |
| 218182_s_at | CLDN1    | 0.024558 | 2.36E-07 | 1.43E-05 |
| 218184_at   | TULP4    | -0.00472 | 0.005235 | 0.039844 |
| 218192_at   | IP6K2    | 0.008179 | 2.38E-05 | 0.000536 |
| 218194_at   | REXO2    | -0.00796 | 9.91E-06 | 0.000267 |
| 218204_s_at | FYCO1    | -0.00831 | 0.000439 | 0.005709 |
| 218223_s_at | PLEKHO1  | 0.010359 | 4.35E-05 | 0.000877 |
| 218225_at   | ECSIT    | -0.00677 | 0.004941 | 0.03811  |
| 218232_at   | C1QA     | 0.011216 | 0.001311 | 0.013644 |
| 218237_s_at | SLC38A1  | 0.015452 | 0.000733 | 0.00857  |
| 218245_at   | TSKU     | -0.01759 | 7.96E-08 | 6.09E-06 |

|             |           |           |          |          |
|-------------|-----------|-----------|----------|----------|
| 218254_s_at | SAR1B     | -0.0105   | 7.75E-05 | 0.001425 |
| 218272_at   | TTC38     | -0.01841  | 2.71E-08 | 2.79E-06 |
| 218275_at   | SLC25A10  | -0.01431  | 1.11E-07 | 7.98E-06 |
| 218285_s_at | BDH2      | -0.01216  | 1.69E-07 | 1.08E-05 |
| 218289_s_at | UBA5      | -0.00609  | 0.007002 | 0.049112 |
| 218292_s_at | PRKAG2    | -0.00775  | 0.001864 | 0.018007 |
| 218299_at   | C11orf24  | -0.00535  | 0.004835 | 0.0375   |
| 218308_at   | TACC3     | 0.00554   | 0.005072 | 0.038833 |
| 218309_at   | CAMK2N1   | -0.00583  | 0.000166 | 0.002641 |
| 218313_s_at | GALNT7    | 0.008254  | 0.003737 | 0.030962 |
| 218322_s_at | ACSL5     | 0.011782  | 1.91E-08 | 2.17E-06 |
| 218328_at   | COQ4      | -0.00684  | 0.005631 | 0.041993 |
| 218377_s_at | RWDD2B    | -0.00646  | 0.000193 | 0.002982 |
| 218380_at   | LOC728392 | 0.012157  | 8.77E-05 | 0.001569 |
| 218392_x_at | SFXN1     | -0.01104  | 1.16E-06 | 4.99E-05 |
| 218394_at   | ROGDI     | -0.01469  | 5.54E-05 | 0.001077 |
| 218398_at   | MRPS30    | -0.00673  | 0.000372 | 0.005027 |
| 218400_at   | OAS3      | 0.010568  | 0.000661 | 0.007905 |
| 218414_s_at | NDE1      | 0.004292  | 0.005273 | 0.040053 |
| 218418_s_at | KANK2     | 0.009849  | 0.000845 | 0.009565 |
| 218440_at   | MCCC1     | -0.01268  | 2.62E-08 | 2.76E-06 |
| 218447_at   | C16orf61  | -0.0052   | 0.002652 | 0.023665 |
| 218451_at   | CDCP1     | 0.009338  | 0.001387 | 0.014202 |
| 218455_at   | NFS1      | -0.01103  | 3.25E-06 | 0.000112 |
| 218471_s_at | BBS1      | -0.0088   | 0.000143 | 0.002336 |
| 218480_at   | AGBL5     | -0.0111   | 0.001236 | 0.012994 |
| 218483_s_at | IFT46     | -0.00806  | 0.006989 | 0.049047 |
| 218487_at   | ALAD      | -0.01804  | 6.33E-08 | 5.29E-06 |
| 218489_s_at | ALAD      | -0.01676  | 2.38E-05 | 0.000536 |
| 218494_s_at | SLC2A4RG  | -0.01525  | 6.32E-05 | 0.001197 |
| 218499_at   | MST4      | 0.010523  | 0.006195 | 0.045083 |
| 218511_s_at | PNPO      | -0.01478  | 6.77E-06 | 0.000198 |
| 218512_at   | WDR12     | -0.00771  | 0.006593 | 0.047014 |
| 218518_at   | FAM13B    | 8.23E-03  | 0.002606 | 0.023352 |
| 218523_at   | LHPP      | -0.01395  | 5.37E-05 | 0.00105  |
| 218536_at   | MRS2      | -0.00754  | 0.001459 | 0.014765 |
| 218541_s_at | C8orf4    | 0.009993  | 0.005498 | 0.041238 |
| 218546_at   | C1orf115  | -0.01113  | 3.4E-05  | 0.000719 |
| 218549_s_at | FAM82B    | -0.00654  | 0.003016 | 0.026196 |
| 218552_at   | ECHDC2    | -0.01365  | 1.43E-07 | 9.64E-06 |
| 218557_at   | NIT2      | -1.24E-02 | 0.000339 | 0.004665 |
| 218559_s_at | MAFB      | 0.012442  | 0.000456 | 0.005879 |
| 218563_at   | NDUFA3    | -0.00765  | 0.000364 | 0.004937 |
| 218565_at   | C9orf114  | -0.01336  | 5.24E-06 | 0.000161 |
| 218575_at   | ANAPC1    | -0.00533  | 0.00513  | 0.039207 |
| 218576_s_at | DUSP12    | 0.007226  | 0.002309 | 0.021246 |
| 218580_x_at | AURKAIP1  | -0.00642  | 0.004907 | 0.037929 |
| 218589_at   | LPAR6     | 0.009326  | 0.004631 | 0.03626  |
| 218592_s_at | CECR5     | -0.00782  | 0.006015 | 0.044209 |

|             |          |          |          |          |
|-------------|----------|----------|----------|----------|
| 218596_at   | TBC1D13  | -0.0181  | 2.09E-08 | 2.32E-06 |
| 218597_s_at | CISD1    | -0.00871 | 1.83E-07 | 1.15E-05 |
| 218600_at   | LIMD2    | 0.007129 | 0.002895 | 0.02535  |
| 218603_at   | HECA     | 0.008442 | 0.00235  | 0.021543 |
| 218610_s_at | CPPED1   | -0.0095  | 0.000255 | 0.003728 |
| 218611_at   | IER5     | 0.013229 | 4.45E-05 | 0.000895 |
| 218614_at   | C12orf35 | 0.011053 | 0.000579 | 0.007089 |
| 218628_at   | CCDC53   | -0.00501 | 0.006801 | 0.048069 |
| 218632_at   | HECTD3   | -0.00819 | 2.14E-05 | 0.000491 |
| 218633_x_at | ABHD10   | -0.00883 | 0.001943 | 0.018607 |
| 218640_s_at | PLEKHF2  | -0.00868 | 0.001254 | 0.013145 |
| 218646_at   | C4orf27  | 0.005259 | 0.006032 | 0.044287 |
| 218647_s_at | YRDC     | -0.00668 | 0.001986 | 0.018946 |
| 218656_s_at | LHFP     | 0.017749 | 1.55E-05 | 0.000383 |
| 218661_at   | NAT15    | -0.0148  | 2.07E-06 | 7.74E-05 |
| 218665_at   | FZD4     | -0.00959 | 0.004385 | 0.034852 |
| 218667_at   | PJA1     | 0.007631 | 0.003174 | 0.02728  |
| 218671_s_at | ATPIF1   | -0.00648 | 0.00105  | 0.011412 |
| 218676_s_at | PCTP     | -0.01265 | 0.000116 | 0.001964 |
| 218677_at   | S100A14  | 0.011391 | 4.94E-05 | 0.000978 |
| 218684_at   | LRR8D    | -0.01183 | 1.17E-06 | 5.02E-05 |
| 218693_at   | TSPAN15  | 0.01026  | 2.29E-06 | 8.41E-05 |
| 218699_at   | RAB7L1   | -0.01334 | 6.73E-05 | 0.001262 |
| 218700_s_at | RAB7L1   | -0.0173  | 1.17E-05 | 0.000303 |
| 218716_x_at | MTO1     | -0.01022 | 6.54E-06 | 0.000192 |
| 218722_s_at | CCDC51   | -0.00692 | 0.000873 | 0.009827 |
| 218723_s_at | C13orf15 | -0.00936 | 0.004357 | 0.034737 |
| 218747_s_at | TAPBPL   | 0.009283 | 0.000604 | 0.007345 |
| 218756_s_at | DHRS11   | -0.01506 | 0.000149 | 0.002411 |
| 218760_at   | COQ6     | -0.00743 | 0.00326  | 0.027876 |
| 218773_s_at | MSRB2    | -0.01247 | 5.25E-05 | 0.001032 |
| 218776_s_at | TMEM62   | 0.007694 | 0.001774 | 0.017365 |
| 218779_x_at | EPS8L1   | 0.009385 | 0.004424 | 0.035078 |
| 218780_at   | HOOK2    | -0.00768 | 0.001016 | 0.01111  |
| 218789_s_at | C11orf71 | -0.01117 | 1.51E-05 | 0.000375 |
| 218802_at   | CCDC109B | 0.009334 | 0.005919 | 0.043705 |
| 218805_at   | GIMAP5   | 0.013725 | 0.000289 | 0.00413  |
| 218828_at   | PLSCR3   | 0.005596 | 0.006198 | 0.045092 |
| 218838_s_at | TTC31    | -0.00543 | 0.006576 | 0.046936 |
| 218844_at   | ACSF2    | -0.02397 | 4.65E-10 | 1.39E-07 |
| 218845_at   | DUSP22   | 0.009026 | 0.001997 | 0.019008 |
| 218848_at   | THOC6    | 0.005561 | 0.002867 | 0.025162 |
| 218854_at   | DSE      | 0.013658 | 0.000179 | 0.002806 |
| 218856_at   | TNFRSF21 | -0.01347 | 0.003585 | 0.030066 |
| 218858_at   | DEPDC6   | 0.013212 | 3.48E-06 | 0.000119 |
| 218862_at   | ASB13    | -0.01481 | 0.000137 | 0.002254 |
| 218869_at   | MLYCD    | -0.00817 | 0.002352 | 0.021544 |
| 218870_at   | ARHGAP15 | 0.02567  | 1.12E-06 | 4.89E-05 |
| 218872_at   | TESC     | 1.47E-02 | 2.07E-05 | 0.00048  |



|             |            |           |          |          |
|-------------|------------|-----------|----------|----------|
| 218883_s_at | MLF1IP     | 0.007345  | 0.003706 | 0.030804 |
| 218887_at   | MRPL2      | -0.00942  | 0.002141 | 0.020025 |
| 218893_at   | ISOC2      | -0.01122  | 0.000738 | 0.008607 |
| 218897_at   | TMEM177    | -0.00936  | 0.001579 | 0.015705 |
| 218921_at   | SIGIRR     | -0.01333  | 3.88E-06 | 0.000129 |
| 218931_at   | RAB17      | -0.0104   | 3.55E-06 | 0.000121 |
| 218938_at   | FBXL15     | -0.00527  | 0.0046   | 0.036145 |
| 218948_at   | QRSL1      | -0.00948  | 0.000571 | 0.007011 |
| 218957_s_at | PAAF1      | -0.01561  | 9.73E-07 | 4.43E-05 |
| 218959_at   | HOXC10     | -0.00681  | 0.004751 | 0.037029 |
| 218960_at   | TMPRSS4    | 0.020931  | 4.76E-09 | 7.64E-07 |
| 218966_at   | MYO5C      | 0.009273  | 0.005453 | 0.041069 |
| 218967_s_at | PTER       | -1.34E-02 | 0.001354 | 0.013936 |
| 218971_s_at | WDR91      | -0.00807  | 0.000227 | 0.003388 |
| 218976_at   | DNAJC12    | -0.01563  | 9.33E-05 | 0.001648 |
| 218980_at   | FHOD3      | -0.01039  | 0.000685 | 0.008111 |
| 218983_at   | C1RL       | 0.013726  | 8.03E-06 | 0.000225 |
| 218986_s_at | DDX60      | 0.00895   | 0.000814 | 0.009318 |
| 218988_at   | SLC35E3    | -0.00717  | 0.003221 | 0.027577 |
| 218995_s_at | EDN1       | 0.010121  | 0.002181 | 0.020275 |
| 218996_at   | TFPT       | 0.007523  | 0.001862 | 0.018004 |
| 218997_at   | POLR1E     | 0.005886  | 0.00087  | 0.009798 |
| 219008_at   | C2orf43    | -0.00742  | 0.004089 | 0.033101 |
| 219013_at   | GALNT11    | -0.00707  | 0.000995 | 0.010926 |
| 219014_at   | PLAC8      | 0.021913  | 6.69E-06 | 0.000196 |
| 219032_x_at | OPN3       | -0.00935  | 1.23E-05 | 0.000314 |
| 219033_at   | PARP8      | 0.013322  | 0.000492 | 0.006249 |
| 219036_at   | CEP70      | -0.00726  | 0.005565 | 0.041659 |
| 219040_at   | CORO7      | -0.00556  | 0.00637  | 0.045834 |
| 219049_at   | CSGALNACT1 | 0.0154    | 6.04E-05 | 0.001153 |
| 219054_at   | C5orf23    | -0.01886  | 1.24E-06 | 5.25E-05 |
| 219059_s_at | LYVE1      | 0.009618  | 0.005267 | 0.04002  |
| 219076_s_at | PXMP2      | -0.02267  | 1.05E-13 | 6.59E-10 |
| 219077_s_at | WWOX       | -0.00831  | 0.003434 | 0.029108 |
| 219079_at   | CYB5R4     | 0.006623  | 0.001296 | 0.013522 |
| 219103_at   | ASAP3      | -0.01427  | 1.26E-05 | 0.000322 |
| 219112_at   | FNIP1      | 0.006499  | 0.006157 | 0.044957 |
| 219113_x_at | HSD17B14   | -0.01406  | 1.43E-05 | 0.00036  |
| 219117_s_at | FKBP11     | 0.012844  | 0.001992 | 0.018991 |
| 219118_at   | FKBP11     | 0.015113  | 0.000398 | 0.005296 |
| 219119_at   | NAA38      | 0.008775  | 0.00209  | 0.01969  |
| 219133_at   | OXSM       | -0.01056  | 0.002268 | 0.020965 |
| 219134_at   | ELTD1      | 0.009776  | 0.005484 | 0.041205 |
| 219140_s_at | RBP4       | -0.02677  | 8.84E-05 | 0.001579 |
| 219147_s_at | C9orf95    | -0.01146  | 0.00042  | 0.005514 |
| 219159_s_at | SLAMF7     | 0.03405   | 0.000173 | 0.002734 |
| 219161_s_at | CKLF       | 0.020874  | 5.06E-12 | 5.64E-09 |
| 219176_at   | C2orf47    | -0.01173  | 1.79E-07 | 1.13E-05 |
| 219183_s_at | CYTH4      | 0.007512  | 0.006639 | 0.04727  |

|             |           |          |          |          |
|-------------|-----------|----------|----------|----------|
| 219188_s_at | MACROD1   | -0.01601 | 3.93E-09 | 6.73E-07 |
| 219191_s_at | BIN2      | 0.012425 | 5.11E-05 | 0.001008 |
| 219194_at   | SEMA4G    | -0.01127 | 0.000434 | 0.005655 |
| 219195_at   | PPARGC1A  | -0.00786 | 0.000684 | 0.00811  |
| 219200_at   | FASTKD3   | -0.01029 | 0.001014 | 0.011098 |
| 219213_at   | JAM2      | 0.016171 | 1.48E-05 | 0.00037  |
| 219215_s_at | SLC39A4   | -0.0194  | 4.64E-07 | 2.39E-05 |
| 219217_at   | NARS2     | -0.01113 | 0.00012  | 0.002029 |
| 219220_x_at | MRPS22    | -0.00601 | 0.001143 | 0.012192 |
| 219229_at   | SLCO3A1   | 0.016599 | 2.13E-05 | 0.00049  |
| 219243_at   | GIMAP4    | 0.017315 | 2.98E-07 | 1.72E-05 |
| 219244_s_at | MRPL46    | -0.0088  | 0.00395  | 0.032314 |
| 219246_s_at | OGFOD2    | -0.00765 | 0.003645 | 0.030422 |
| 219255_x_at | IL17RB    | -0.01243 | 0.006173 | 0.045016 |
| 219257_s_at | SPHK1     | 0.008699 | 0.001828 | 0.017759 |
| 219268_at   | ETNK2     | -0.02277 | 1.79E-08 | 2.05E-06 |
| 219277_s_at | OGDHL     | -0.0159  | 2.27E-06 | 8.36E-05 |
| 219279_at   | DOCK10    | 0.015576 | 0.000914 | 0.010186 |
| 219281_at   | MSRA      | -0.02438 | 2.07E-11 | 1.77E-08 |
| 219298_at   | ECHDC3    | -0.01697 | 2.68E-08 | 2.79E-06 |
| 219303_at   | RNF219    | 0.006931 | 0.003851 | 0.031672 |
| 219307_at   | PDSS2     | -0.01088 | 9.34E-06 | 0.000257 |
| 219313_at   | GRAMD1C   | -0.00704 | 0.006443 | 0.046211 |
| 219318_x_at | MED31     | -0.01495 | 0.000123 | 0.002067 |
| 219321_at   | MPP5      | -0.0072  | 0.005612 | 0.041882 |
| 219340_s_at | CLN8      | -0.00899 | 0.00594  | 0.043814 |
| 219341_at   | CLN8      | -0.01378 | 0.000594 | 0.007241 |
| 219345_at   | BOLA1     | -0.006   | 0.005365 | 0.040561 |
| 219359_at   | ATHL1     | 0.012403 | 0.000255 | 0.003732 |
| 219367_s_at |           | 0.012124 | 9.19E-05 | 0.001629 |
| 219386_s_at | SLAMF8    | 0.011673 | 0.002288 | 0.021106 |
| 219387_at   | CCDC88A   | 0.009231 | 0.001972 | 0.018834 |
| 219395_at   | ESRP2     | -0.0084  | 0.001335 | 0.013824 |
| 219401_at   | XYLT2     | 0.006594 | 0.002885 | 0.025295 |
| 219413_at   | ACBD4     | -0.00664 | 0.005972 | 0.043972 |
| 219418_at   | NHEJ1     | -0.01314 | 6.75E-07 | 3.29E-05 |
| 219440_at   | RAI2      | 0.014854 | 2.18E-05 | 0.000498 |
| 219449_s_at | TMEM70    | -0.00635 | 0.004059 | 0.03299  |
| 219452_at   | DPEP2     | 0.009549 | 0.002751 | 0.024405 |
| 219455_at   | C7orf63   | -0.00867 | 0.004239 | 0.034024 |
| 219462_at   | TMEM53    | -0.00744 | 0.000457 | 0.005887 |
| 219463_at   | C20orf103 | 0.009161 | 0.004493 | 0.035527 |
| 219471_at   | C13orf18  | 0.013568 | 5.75E-05 | 0.00111  |
| 219489_s_at | NXN       | 0.015978 | 1.03E-06 | 4.61E-05 |
| 219496_at   | ANKRD57   | -0.01094 | 0.002858 | 0.025113 |
| 219498_s_at | BCL11A    | 0.014519 | 4.47E-06 | 0.000143 |
| 219505_at   | CECR1     | 0.022498 | 5.27E-06 | 0.000162 |
| 219511_s_at | SNCAIP    | 0.011911 | 0.002266 | 0.020954 |
| 219519_s_at | SIGLEC1   | 0.008582 | 0.002302 | 0.021202 |

|             |              |          |          |          |
|-------------|--------------|----------|----------|----------|
| 219525_at   | SLC47A1      | -0.02002 | 1.46E-06 | 5.94E-05 |
| 219527_at   | MOSC2        | -0.02308 | 3.89E-12 | 4.56E-09 |
| 219528_s_at | BCL11B       | 0.010823 | 0.000699 | 0.008238 |
| 219541_at   | LIME1        | -0.00858 | 0.000848 | 0.009589 |
| 219543_at   | PBLD         | -0.01143 | 3.48E-06 | 0.000119 |
| 219550_at   | ROBO3        | 0.010665 | 0.000126 | 0.002103 |
| 219551_at   | EAF2         | -0.01522 | 0.00099  | 0.010882 |
| 219554_at   | RHCG         | -0.01986 | 2.94E-05 | 0.000639 |
| 219574_at   | MARCH1       | 0.011101 | 0.002387 | 0.021779 |
| 219575_s_at | COG8         | -0.00698 | 0.001966 | 0.018792 |
| 219576_at   | MAP7D3       | 0.008659 | 0.001138 | 0.012161 |
| 219581_at   | TSEN2        | -0.00955 | 0.002675 | 0.0238   |
| 219582_at   | OGFRL1       | 0.010831 | 0.001579 | 0.015705 |
| 219594_at   | NINJ2        | 0.007785 | 0.003539 | 0.029743 |
| 219607_s_at | MS4A4A       | 0.023765 | 1.13E-06 | 4.92E-05 |
| 219610_at   | RGNEF        | -0.01121 | 0.000449 | 0.005809 |
| 219615_s_at | KCNK5        | -0.01393 | 0.001245 | 0.013068 |
| 219616_at   | ACSS3        | -0.01427 | 9.97E-05 | 0.001741 |
| 219620_x_at | C9orf167     | 0.00649  | 0.001861 | 0.017999 |
| 219630_at   | PDZK1IP1     | -0.01679 | 0.003441 | 0.02914  |
| 219632_s_at | TRPV1        | -0.01432 | 4.57E-06 | 0.000145 |
| 219655_at   | C7orf10      | -0.01781 | 1.02E-05 | 0.000273 |
| 219664_s_at | DECR2        | -0.01353 | 5.28E-05 | 0.001035 |
| 219666_at   | MS4A6A       | 0.01749  | 0.00032  | 0.004474 |
| 219684_at   | RTP4         | 0.013574 | 2.72E-06 | 9.72E-05 |
| 219700_at   | PLXDC1       | 0.010948 | 0.004596 | 0.03613  |
| 219705_at   | QSER1        | 0.007015 | 0.001988 | 0.018959 |
| 219713_at   | SHPK         | -0.0086  | 0.000409 | 0.005394 |
| 219718_at   | FGGY         | -0.01108 | 1.22E-05 | 0.000312 |
| 219722_s_at | GDPD3        | -0.01837 | 5.22E-06 | 0.000161 |
| 219723_x_at | AGPAT3       | -0.01629 | 1.76E-05 | 0.00042  |
| 219732_at   | LPPR1        | -0.0297  | 6.59E-10 | 1.75E-07 |
| 219739_at   | RNF186       | -0.0314  | 1.78E-10 | 7.32E-08 |
| 219744_at   | FN3K         | -0.02426 | 4.27E-06 | 0.000139 |
| 219773_at   | NOX4         | -0.0214  | 9.62E-06 | 0.000262 |
| 219785_s_at | LOC100288525 | -0.01369 | 0.000706 | 0.008316 |
| 219788_at   | PILRA        | 0.009673 | 2.46E-05 | 0.000548 |
| 219789_at   | NPR3         | -0.02281 | 1.34E-07 | 9.3E-06  |
| 219790_s_at | NPR3         | -0.01795 | 1.06E-05 | 0.000281 |
| 219796_s_at | CDHR5        | -0.01664 | 5.88E-06 | 0.000177 |
| 219799_s_at | DHRS9        | 0.006909 | 0.003763 | 0.031114 |
| 219803_at   | ANGPTL3      | -0.03662 | 5.08E-09 | 7.91E-07 |
| 219809_at   | WDR55        | -0.00844 | 0.000424 | 0.005561 |
| 219817_at   | C12orf47     | 0.008894 | 0.004126 | 0.033314 |
| 219839_x_at | TCL6         | -0.0095  | 6.29E-05 | 0.001194 |
| 219840_s_at | TCL6         | -0.01585 | 6.88E-06 | 0.0002   |
| 219850_s_at | EHF          | 1.36E-02 | 0.000785 | 0.009047 |
| 219864_s_at | RCAN3        | 0.022124 | 8.61E-06 | 0.000238 |
| 219867_at   | CHODL        | 1.32E-02 | 0.000921 | 0.010254 |

|             |           |           |          |          |
|-------------|-----------|-----------|----------|----------|
| 219872_at   | FAM198B   | 0.016367  | 3.94E-05 | 0.00081  |
| 219873_at   | COLEC11   | -0.01801  | 4.37E-06 | 0.000141 |
| 219876_s_at | GOLGA2B   | -0.00856  | 0.002491 | 0.022599 |
| 219891_at   | PGPEP1    | -0.0142   | 1.71E-05 | 0.000412 |
| 219902_at   | BHMT2     | -0.02283  | 4.65E-09 | 7.56E-07 |
| 219915_s_at | SLC16A10  | -0.02244  | 1.43E-08 | 1.75E-06 |
| 219945_at   | DDX25     | -0.01003  | 0.002356 | 0.021567 |
| 219947_at   | CLEC4A    | 0.010148  | 0.000443 | 0.00575  |
| 219954_s_at | GBA3      | -0.01831  | 2.37E-05 | 0.000535 |
| 219956_at   | GALNT6    | 0.010243  | 0.004368 | 0.034764 |
| 219962_at   | ACE2      | -0.01602  | 0.000128 | 0.002132 |
| 219970_at   | GIPC2     | -1.55E-02 | 0.001084 | 0.011694 |
| 219974_x_at | ECHDC1    | -0.00747  | 2.11E-05 | 0.000486 |
| 219986_s_at | ACAD10    | -0.01118  | 0.000139 | 0.00229  |
| 219998_at   | HSPC159   | -0.00798  | 0.002402 | 0.021875 |
| 220002_at   | KIF26B    | 0.011343  | 1.1E-06  | 4.83E-05 |
| 220005_at   | P2RY13    | 1.57E-02  | 1.47E-05 | 0.000368 |
| 220020_at   | XPNPEP3   | -0.01092  | 7.68E-05 | 0.001415 |
| 220038_at   | C8orf44   | -0.01076  | 0.003626 | 0.030308 |
| 220061_at   | ACSM5     | -0.02491  | 9.14E-08 | 6.81E-06 |
| 220074_at   | CDHR5     | -0.009    | 0.001169 | 0.012439 |
| 220075_s_at | CDHR5     | -0.03898  | 6.28E-10 | 1.69E-07 |
| 220084_at   | C14orf105 | -0.00795  | 0.004198 | 0.033777 |
| 220089_at   | L2HGDH    | -0.01148  | 8.03E-05 | 0.001464 |
| 220092_s_at | ANTXR1    | 0.017261  | 0.000327 | 0.004543 |
| 220094_s_at | CCDC90A   | -0.01488  | 7.54E-13 | 1.86E-09 |
| 220100_at   | SLC22A11  | -0.02313  | 7.2E-06  | 0.000207 |
| 220119_at   | EPB41L4A  | -0.0084   | 0.006251 | 0.045387 |
| 220128_s_at | NIPAL2    | 9.25E-03  | 0.002381 | 0.021728 |
| 220132_s_at | CLEC2D    | 0.013855  | 0.000247 | 0.003629 |
| 220135_s_at | SLC7A9    | -0.03008  | 2.62E-07 | 1.54E-05 |
| 220139_at   | DNMT3L    | -0.01503  | 5.85E-05 | 0.001125 |
| 220146_at   | TLR7      | 0.009894  | 0.002583 | 0.023221 |
| 220148_at   | ALDH8A1   | -0.02035  | 3.76E-07 | 2.03E-05 |
| 220149_at   | C2orf54   | -0.02785  | 1.35E-06 | 5.59E-05 |
| 220150_s_at | FAM184A   | -0.00741  | 0.000317 | 0.004441 |
| 220156_at   | EFCAB1    | 0.006815  | 0.003591 | 0.030086 |
| 220177_s_at | TMPRSS3   | 0.009644  | 0.003448 | 0.029143 |
| 220178_at   | C19orf28  | -0.01334  | 5.96E-05 | 0.001142 |
| 220186_s_at | CDHR2     | -0.02114  | 2.1E-08  | 2.32E-06 |
| 220252_x_at | CXorf21   | 0.006936  | 0.005226 | 0.039789 |
| 220260_at   | TBC1D19   | -0.00641  | 0.004827 | 0.037479 |
| 220263_at   | SMAD5OS   | -0.00714  | 0.006989 | 0.049047 |
| 220285_at   | FAM108B1  | -0.00935  | 0.000694 | 0.008199 |
| 220297_at   | BTBD7     | -8.33E-03 | 0.001456 | 0.01475  |
| 220303_at   | PDZD3     | -0.01744  | 1.19E-07 | 8.48E-06 |
| 220310_at   | TUBAL3    | -0.02628  | 1.37E-07 | 9.45E-06 |
| 220329_s_at | RMND1     | -0.00917  | 0.000761 | 0.00883  |
| 220330_s_at | SAMSN1    | 0.018689  | 0.000178 | 0.00279  |

|             |          |           |          |          |
|-------------|----------|-----------|----------|----------|
| 220333_at   | PAQR5    | -0.01548  | 3.49E-05 | 0.00073  |
| 220357_s_at | SGK2     | -0.01453  | 2.9E-09  | 5.39E-07 |
| 220358_at   | BATF3    | 0.007318  | 0.002239 | 0.020718 |
| 220365_at   | ALLC     | -0.01139  | 0.00067  | 0.007983 |
| 220372_at   | DNAJC28  | -0.01098  | 0.000157 | 0.002519 |
| 220376_at   | LRRC19   | -0.01436  | 0.000245 | 0.003617 |
| 220407_s_at | TGFB2    | 0.013438  | 0.000124 | 0.002074 |
| 220465_at   | LOC80054 | -0.00771  | 6.79E-05 | 0.001271 |
| 220507_s_at | UPB1     | -0.03731  | 9.36E-12 | 9.48E-09 |
| 220516_at   | ZSCAN2   | -0.00565  | 0.003602 | 0.030141 |
| 220554_at   | SLC22A7  | -1.42E-02 | 3.67E-06 | 0.000123 |
| 220567_at   | IKZF2    | 0.009883  | 0.000446 | 0.005773 |
| 220577_at   | GVINP1   | 0.010852  | 0.004966 | 0.038243 |
| 220591_s_at | EFHC2    | 0.014053  | 2.68E-06 | 9.59E-05 |
| 220604_x_at | FTCD     | -0.02863  | 1.61E-08 | 1.92E-06 |
| 220617_s_at | ZNF532   | 0.009135  | 0.001215 | 0.012821 |
| 220642_x_at | GPR89A   | -0.01442  | 3.27E-06 | 0.000113 |
| 220671_at   | CCRN4L   | -0.02295  | 1.75E-09 | 3.64E-07 |
| 220675_s_at | PNPLA3   | -0.01137  | 0.001407 | 0.014346 |
| 220723_s_at | CWH43    | -0.01621  | 0.000181 | 0.002818 |
| 220727_at   | KCNK10   | -0.01911  | 2.18E-07 | 1.34E-05 |
| 220731_s_at | NECAP2   | 6.21E-03  | 0.000204 | 0.003105 |
| 220740_s_at | SLC12A6  | -0.01478  | 4.04E-07 | 2.15E-05 |
| 220741_s_at | PPA2     | -0.00615  | 0.005452 | 0.041069 |
| 220753_s_at | CRYL1    | -0.02136  | 1.74E-08 | 2.02E-06 |
| 220773_s_at | GPHN     | -0.01997  | 1.99E-06 | 7.53E-05 |
| 220801_s_at | HAO2     | -0.03757  | 1.62E-10 | 6.96E-08 |
| 220809_at   |          | -0.00624  | 0.002301 | 0.021202 |
| 220812_s_at | HHLA2    | -0.01181  | 0.003733 | 0.030938 |
| 220819_at   | FRMD1    | -0.01296  | 2.42E-05 | 0.000542 |
| 220865_s_at | PDSS1    | -0.01061  | 0.001502 | 0.015117 |
| 220892_s_at | PSAT1    | -0.02711  | 7.85E-06 | 0.000221 |
| 220915_s_at |          | -7.52E-03 | 0.005498 | 0.041238 |
| 220930_s_at | MGC5590  | -1.01E-02 | 0.0016   | 0.015874 |
| 220934_s_at | TMEM223  | -8.17E-03 | 0.002232 | 0.020669 |
| 220951_s_at | A1CF     | -0.02537  | 2.45E-06 | 8.91E-05 |
| 220988_s_at | C1QTNF3  | 0.014609  | 9.87E-05 | 0.001727 |
| 220989_s_at | AMN      | -0.00638  | 0.007024 | 0.049239 |
| 220999_s_at | CYFIP2   | -0.01227  | 1.61E-05 | 0.000394 |
| 221004_s_at | ITM2C    | 0.023717  | 5.46E-09 | 8.33E-07 |
| 221006_s_at | SNX27    | -0.01269  | 3.34E-05 | 0.000709 |
| 221008_s_at | AGXT2L1  | -0.02315  | 0.000126 | 0.002103 |
| 221011_s_at | LBH      | 0.008323  | 0.003859 | 0.031716 |
| 221015_s_at | CDADC1   | -0.01405  | 1.25E-05 | 0.000318 |
| 221041_s_at | SLC17A5  | -0.01153  | 2.37E-05 | 0.000535 |
| 221042_s_at | CLMN     | -0.00752  | 0.001062 | 0.011518 |
| 221058_s_at | CKLF     | 0.016315  | 1.12E-08 | 1.44E-06 |
| 221059_s_at | COTL1    | -0.01196  | 0.00156  | 0.015566 |
| 221069_s_at | TACO1    | -0.0155   | 0.001265 | 0.013244 |

|             |              |           |          |          |
|-------------|--------------|-----------|----------|----------|
| 221073_s_at | NOD1         | 0.00569   | 0.004715 | 0.036815 |
| 221078_s_at | CCDC88A      | 0.009004  | 0.00459  | 0.036107 |
| 221087_s_at | APOL3        | 0.014548  | 0.000324 | 0.004515 |
| 221092_at   | IKZF3        | 0.015127  | 6.84E-05 | 0.001278 |
| 221127_s_at | DKK3         | 0.017608  | 1.61E-05 | 0.000393 |
| 221142_s_at | PECR         | -0.01155  | 0.000289 | 0.004128 |
| 221163_s_at | MLXIPL       | -0.01284  | 2.49E-08 | 2.68E-06 |
| 221188_s_at | CIDEB        | -0.01251  | 4.62E-06 | 0.000146 |
| 221194_s_at | RNFT1        | -6.78E-03 | 0.002071 | 0.019539 |
| 221203_s_at | YEATS2       | 0.007896  | 0.001593 | 0.015814 |
| 221210_s_at | NPL          | -0.02626  | 1.39E-07 | 9.53E-06 |
| 221221_s_at | KLHL3        | -0.01429  | 0.001118 | 0.012009 |
| 221223_x_at | CISH         | -0.01039  | 0.000835 | 0.00949  |
| 221230_s_at | ARID4B       | 0.008899  | 0.000294 | 0.004188 |
| 221245_s_at | FZD5         | -0.01413  | 2.06E-05 | 0.000477 |
| 221246_x_at | TNS1         | -0.00742  | 0.000511 | 0.006444 |
| 221253_s_at | MUTED        | 0.01003   | 0.000667 | 0.007953 |
| 221256_s_at | HDHD3        | -0.02215  | 3.16E-07 | 1.79E-05 |
| 221261_x_at | MAGED4       | 0.010961  | 0.000296 | 0.004211 |
| 221268_s_at | SGPP1        | -0.00853  | 0.00279  | 0.024654 |
| 221274_s_at | LMAN2L       | -0.00794  | 0.003707 | 0.030804 |
| 221291_at   | ULBP2        | 0.006033  | 0.003513 | 0.029586 |
| 221298_s_at | SLC22A8      | -0.03193  | 1.82E-06 | 6.96E-05 |
| 221305_s_at | UGT1A8       | -3.39E-02 | 1.35E-07 | 9.37E-06 |
| 221369_at   | MTNR1A       | -0.01127  | 1.17E-05 | 0.000302 |
| 221425_s_at | ISCA1        | -0.00653  | 0.00665  | 0.047315 |
| 221434_s_at | C14orf156    | -0.00655  | 0.000737 | 0.008607 |
| 221437_s_at | MRPS15       | -0.00972  | 0.000144 | 0.00235  |
| 221459_at   | TAAR5        | 0.006396  | 0.005967 | 0.043956 |
| 221474_at   | MYL12B       | 0.00576   | 0.001454 | 0.014732 |
| 221479_s_at | BNIP3L       | -0.00622  | 0.002049 | 0.019399 |
| 221498_at   | SNX27        | -0.00793  | 0.001521 | 0.015273 |
| 221516_s_at | SMCR7L       | -0.01105  | 0.0004   | 0.00531  |
| 221523_s_at | RRAGD        | -0.01096  | 0.002346 | 0.021513 |
| 221524_s_at | RRAGD        | -0.01403  | 1.49E-07 | 9.88E-06 |
| 221530_s_at | BHLHE41      | 0.007584  | 0.006572 | 0.046926 |
| 221533_at   | FAM162A      | -0.00688  | 0.000844 | 0.00955  |
| 221541_at   | CRISPLD2     | 0.016987  | 0.0004   | 0.005311 |
| 221552_at   | ABHD6        | -0.02046  | 1.06E-09 | 2.47E-07 |
| 221565_s_at | CALHM2       | 0.007554  | 0.0003   | 0.004262 |
| 221572_s_at | SLC26A6      | -0.01602  | 2.5E-08  | 2.68E-06 |
| 221575_at   | SCLY         | -1.13E-02 | 0.000138 | 0.002271 |
| 221581_s_at | LAT2         | 0.006856  | 0.001306 | 0.013605 |
| 221588_x_at | ALDH6A1      | -0.02898  | 5.84E-16 | 1.3E-11  |
| 221589_s_at | LOC100506517 | -0.02673  | 1.33E-12 | 2.33E-09 |
| 221590_s_at | ALDH6A1      | -0.02949  | 3.24E-11 | 2.15E-08 |
| 221601_s_at | FAIM3        | 0.017598  | 1.15E-05 | 0.000299 |
| 221605_s_at | PIPOX        | -0.03255  | 4.07E-10 | 1.28E-07 |
| 221607_x_at | ACTG1        | 0.004178  | 0.000624 | 0.007545 |

|             |              |          |          |          |
|-------------|--------------|----------|----------|----------|
| 221620_s_at | APOO         | -0.00733 | 0.006727 | 0.047679 |
| 221622_s_at | TMEM126B     | -0.00593 | 0.006362 | 0.045801 |
| 221624_at   | TCL6         | -0.01144 | 6.34E-06 | 0.000187 |
| 221627_at   | TRIM10       | -0.01884 | 6.59E-07 | 3.24E-05 |
| 221636_s_at | MOSC2        | -0.02041 | 8.19E-11 | 4.45E-08 |
| 221648_s_at | LOC100507192 | -0.02036 | 4.29E-07 | 2.23E-05 |
| 221651_x_at | IGK@         | 0.031723 | 0.000113 | 0.001926 |
| 221655_x_at | EPS8L1       | 0.008565 | 0.004548 | 0.035826 |
| 221656_s_at | ARHGEF10L    | -0.00886 | 2.7E-05  | 0.000596 |
| 221662_s_at | SLC22A7      | -0.00922 | 0.000522 | 0.006553 |
| 221666_s_at | PYCARD       | 0.018663 | 3.98E-07 | 2.12E-05 |
| 221669_s_at | ACAD8        | -0.01132 | 0.001871 | 0.018041 |
| 221671_x_at | IGK@         | 0.032166 | 9.94E-05 | 0.001739 |
| 221675_s_at | CHPT1        | -0.01035 | 0.00021  | 0.003177 |
| 221679_s_at | ABHD6        | -0.02849 | 3.17E-08 | 3.11E-06 |
| 221690_s_at | NLRP2        | 0.008765 | 0.000966 | 0.010669 |
| 221692_s_at | MRPL34       | -0.01017 | 1.83E-05 | 0.000433 |
| 221698_s_at | CLEC7A       | 0.013767 | 0.000236 | 0.003502 |
| 221701_s_at | STRA6        | -0.00968 | 0.001407 | 0.014346 |
| 221731_x_at | VCAN         | 0.030428 | 1.45E-06 | 5.92E-05 |
| 221748_s_at | TNS1         | -0.00739 | 0.003298 | 0.02814  |
| 221757_at   | PIK3IP1      | 0.007459 | 0.003802 | 0.031379 |
| 221766_s_at | FAM46A       | 0.009525 | 0.003296 | 0.028133 |
| 221773_at   | ELK3         | 0.017049 | 0.000107 | 0.001841 |
| 221778_at   | JHDM1D       | 0.007001 | 0.004516 | 0.035637 |
| 221781_s_at | DNAJC10      | 0.009388 | 0.006519 | 0.04664  |
| 221805_at   | NEFL         | 0.020092 | 0.006721 | 0.047666 |
| 221814_at   | GPR124       | 0.014272 | 4.5E-05  | 0.000903 |
| 221818_at   | INTS5        | -0.00592 | 0.001744 | 0.017112 |
| 221847_at   | LOC100129361 | -0.00643 | 0.001046 | 0.011378 |
| 221848_at   | ZGPAT        | -0.01619 | 0.00022  | 0.003308 |
| 221868_at   | PAIP2B       | -0.01014 | 0.000543 | 0.006744 |
| 221870_at   | EHD2         | 0.019475 | 6.27E-07 | 3.11E-05 |
| 221875_x_at | HLA-F        | 0.015939 | 6.94E-07 | 3.36E-05 |
| 221879_at   | CALML4       | -0.01213 | 0.000305 | 0.004313 |
| 221881_s_at | CLIC4        | -0.00885 | 0.005425 | 0.040908 |
| 221891_x_at | HSPA8        | -0.00465 | 1.1E-05  | 0.00029  |
| 221911_at   | ETV1         | 0.019001 | 8.14E-06 | 0.000227 |
| 221932_s_at | GLRX5        | -0.00972 | 1.57E-06 | 6.31E-05 |
| 221933_at   | NLGN4X       | 0.00583  | 0.003691 | 0.030715 |
| 221942_s_at | GUCY1A3      | 0.010628 | 0.000228 | 0.003403 |
| 221943_x_at | RPL38        | 0.004627 | 0.001441 | 0.014635 |
| 221953_s_at | MMP24        | -0.00656 | 0.006184 | 0.045053 |
| 221958_s_at | WLS          | -0.00903 | 3.11E-05 | 0.000673 |
| 221959_at   | FAM110B      | 0.012315 | 0.000424 | 0.005562 |
| 221968_s_at | ZNF771       | -0.00706 | 0.000961 | 0.010624 |
| 221971_x_at | AGAP10       | -0.00699 | 0.005647 | 0.04207  |
| 221977_at   | TBX2         | -0.01157 | 0.001521 | 0.015273 |
| 221981_s_at | WDR59        | -0.01306 | 3.58E-05 | 0.000746 |

|             |           |           |          |          |
|-------------|-----------|-----------|----------|----------|
| 221998_s_at | VRK3      | -0.01221  | 0.001484 | 0.014956 |
| 222001_x_at | LOC728855 | 0.011794  | 6.74E-10 | 1.77E-07 |
| 222020_s_at | NTM       | 0.01845   | 4.11E-06 | 0.000135 |
| 222021_x_at | SDHAP1    | -0.00654  | 0.002741 | 0.02435  |
| 222049_s_at | RBP4      | -0.02785  | 0.000131 | 0.002178 |
| 222052_at   | C19orf54  | -0.00967  | 0.000217 | 0.003266 |
| 222071_s_at | SLCO4C1   | -9.22E-03 | 0.005091 | 0.038949 |
| 222078_at   | PKLR      | -0.02436  | 7.62E-09 | 1.08E-06 |
| 222083_at   | GLYAT     | -0.0212   | 7.18E-06 | 0.000207 |
| 222085_at   | FAM174B   | 0.009581  | 0.001954 | 0.018701 |
| 222088_s_at | SLC2A14   | 0.015405  | 0.002306 | 0.02123  |
| 222102_at   | GSTA3     | -0.00723  | 0.003933 | 0.032201 |
| 222118_at   | CENPN     | -0.01019  | 0.000792 | 0.009107 |
| 222134_at   | DDO       | -0.01294  | 0.000209 | 0.003168 |
| 222138_s_at | WDR13     | -0.00896  | 8.69E-05 | 0.001558 |
| 222140_s_at | GPR89A    | -0.01057  | 0.00072  | 0.008438 |
| 222146_s_at | TCF4      | 0.015333  | 0.000198 | 0.003033 |
| 222182_s_at | CNOT2     | 0.004802  | 0.006473 | 0.046364 |
| 222190_s_at | C16orf58  | -0.00949  | 0.000215 | 0.003252 |
| 222212_s_at | LASS2     | -0.01072  | 0.000159 | 0.002538 |
| 222217_s_at | SLC27A3   | 0.007975  | 0.005048 | 0.038737 |
| 222218_s_at | PILRA     | 0.008495  | 0.000536 | 0.006685 |
| 222236_s_at | ASAP3     | -0.00633  | 0.002664 | 0.023728 |
| 222257_s_at | ACE2      | -0.02073  | 1.8E-05  | 0.000428 |
| 222269_at   | APOOL     | -0.01023  | 0.000417 | 0.005491 |
| 222271_at   |           | 0.019996  | 2.61E-07 | 1.54E-05 |
| 222288_at   |           | 0.016532  | 8.5E-05  | 0.001534 |
| 222291_at   | FAM149A   | -8.64E-03 | 0.004745 | 0.036999 |
| 222294_s_at | RAB27A    | 0.015394  | 0.00074  | 0.008622 |
| 222324_at   |           | -9.95E-03 | 0.002891 | 0.025327 |
| 222346_at   | LAMA1     | -0.00497  | 0.005452 | 0.041069 |
| 266_s_at    | CD24      | 0.01097   | 0.000389 | 0.005202 |
| 31835_at    | HRG       | -0.01374  | 0.000144 | 0.002345 |
| 31845_at    | ELF4      | 0.012489  | 0.001002 | 0.010998 |
| 32091_at    | SLC25A44  | -0.01009  | 1.66E-05 | 0.000403 |
| 32099_at    | SAFB2     | -0.0082   | 0.000269 | 0.003904 |
| 33304_at    | ISG20     | 0.017733  | 9.45E-06 | 0.000258 |
| 33322_i_at  | SFN       | 0.021319  | 0.002538 | 0.022918 |
| 33323_r_at  | SFN       | 0.025495  | 0.001605 | 0.015922 |
| 33494_at    | ETFDH     | -0.0167   | 4E-09    | 6.81E-07 |
| 34210_at    | CD52      | 0.035673  | 1.25E-07 | 8.83E-06 |
| 34408_at    | RTN2      | 0.006406  | 0.004432 | 0.035121 |
| 34697_at    | LRP6      | -0.00512  | 0.006078 | 0.044557 |
| 34726_at    | CACNB3    | 0.009483  | 0.000107 | 0.001839 |
| 35254_at    | TRAFD1    | 0.00617   | 0.002619 | 0.023453 |
| 36475_at    | GCAT      | -0.01081  | 0.000207 | 0.003147 |
| 36566_at    | CTNS      | -0.00712  | 0.006819 | 0.048162 |
| 36920_at    | MTM1      | -0.00985  | 0.00052  | 0.006531 |
| 36994_at    | ATP6V0C   | -0.00717  | 0.000442 | 0.005739 |



|            |              |           |          |          |
|------------|--------------|-----------|----------|----------|
| 37005_at   | NBL1         | 0.010652  | 0.002959 | 0.025799 |
| 37022_at   | PRELP        | 0.005424  | 0.000578 | 0.007078 |
| 37145_at   | GNLY         | 0.008758  | 0.002898 | 0.025358 |
| 37201_at   | ITIH4        | -0.00736  | 0.00636  | 0.045801 |
| 37408_at   | MRC2         | 0.010651  | 0.001402 | 0.014321 |
| 37590_g_at |              | -0.02189  | 4.2E-09  | 6.98E-07 |
| 38149_at   | ARHGAP25     | 0.023104  | 8.77E-08 | 6.55E-06 |
| 38158_at   | ESPL1        | -0.01407  | 3.51E-07 | 1.92E-05 |
| 38487_at   | STAB1        | 0.011826  | 0.001525 | 0.015305 |
| 38671_at   | PLXND1       | 0.008385  | 0.001344 | 0.013868 |
| 39402_at   | IL1B         | 0.011072  | 0.001136 | 0.01216  |
| 39729_at   | PRDX2        | -0.00775  | 3.49E-05 | 0.00073  |
| 39817_s_at | C6orf108     | -0.01226  | 0.00135  | 0.013912 |
| 40016_g_at | MAST4        | -0.01307  | 2.74E-06 | 9.77E-05 |
| 40225_at   | GAK          | -0.00736  | 0.003432 | 0.029103 |
| 40273_at   | SPHK2        | -0.01318  | 3.82E-05 | 0.000787 |
| 40665_at   | FMO3         | 1.28E-02  | 0.002875 | 0.025225 |
| 41577_at   | PPP1R16B     | -0.02726  | 2.92E-11 | 2.15E-08 |
| 41660_at   | CELSR1       | -0.01416  | 2E-06    | 7.53E-05 |
| 44065_at   | C12orf52     | -0.01065  | 0.000683 | 0.008096 |
| 44120_at   | ADCK2        | 0.006986  | 0.002566 | 0.023113 |
| 44673_at   | SIGLEC1      | 0.011806  | 0.000324 | 0.004515 |
| 44696_at   | TBC1D13      | -0.01851  | 1.99E-09 | 4.02E-07 |
| 44790_s_at | C13orf18     | 0.023324  | 2.42E-06 | 8.85E-05 |
| 45288_at   | ABHD6        | -0.02072  | 3.16E-09 | 5.68E-07 |
| 45297_at   | EHD2         | 0.013266  | 4.22E-05 | 0.000852 |
| 45526_g_at | NAT15        | -0.00759  | 0.001517 | 0.015249 |
| 46665_at   | SEMA4C       | 0.009855  | 0.000351 | 0.004802 |
| 47069_at   | PRR5         | -0.01151  | 0.003022 | 0.026235 |
| 47560_at   | LPHN1        | 0.008206  | 0.003348 | 0.028546 |
| 49306_at   | RASSF4       | -0.00997  | 0.000205 | 0.003118 |
| 49329_at   | KLHL22       | -0.00485  | 0.005678 | 0.042247 |
| 49679_s_at | MMP24        | -0.0073   | 0.004045 | 0.032897 |
| 51158_at   | FAM174B      | 0.008627  | 0.001822 | 0.017717 |
| 52940_at   | LOC100294402 | -0.01689  | 7.64E-07 | 3.63E-05 |
| 53720_at   | C19orf66     | 0.006592  | 0.006192 | 0.045077 |
| 56748_at   | TRIM10       | -0.00944  | 0.000644 | 0.007752 |
| 56829_at   | TRAPPC9      | -0.00462  | 0.005021 | 0.038582 |
| 57539_at   | ZGPAT        | -0.01893  | 5.62E-05 | 0.001091 |
| 57540_at   | RBKS         | -0.00819  | 0.001003 | 0.010999 |
| 57715_at   | CALHM2       | 0.005593  | 0.003887 | 0.031906 |
| 59625_at   | NOL3         | -7.65E-03 | 0.004851 | 0.037585 |
| 632_at     | GSK3A        | -8.59E-03 | 0.000606 | 0.007361 |
| 64064_at   | GIMAP5       | 0.013066  | 0.000206 | 0.003126 |
| 64371_at   | SUGP2        | -0.00799  | 0.006171 | 0.04501  |
| 64408_s_at | CALML4       | -0.0131   | 0.00018  | 0.00281  |
| 65718_at   | GPR124       | 0.00495   | 0.002511 | 0.022728 |
| 78047_s_at |              | -0.00645  | 0.005013 | 0.038559 |
| 89977_at   | ACSM5        | -0.02223  | 3.58E-06 | 0.000121 |

|               |         |          |          |          |
|---------------|---------|----------|----------|----------|
| 90610_at      | LRCH4   | 0.007209 | 0.005424 | 0.040908 |
| 91703_at      | EHBP1L1 | 0.008951 | 0.000627 | 0.007579 |
| AFFX-HUMGAPL  | GAPDH   | -0.00796 | 0.000186 | 0.002893 |
| AFFX-HUMISGF: | STAT1   | 0.011104 | 0.000256 | 0.003737 |
| AFFX-HUMISGF: | STAT1   | 0.011565 | 0.000455 | 0.005876 |
| AFFX-HUMISGF: | STAT1   | 0.010813 | 0.000156 | 0.0025   |
