# Supplementary material for: Human Kidney Tubule-Specific Gene Expression Based Dissection of Chronic Kidney Disease Traits
Source: PubMed Central journal article supplement — eBioMedicine. 2017 Sep 17;24:267–76. doi: 10.1016/j.ebiom.2017.09.014 (PMC5652292; doi:10.1016/j.ebiom.2017.09.014), 2017-09-17
Supplement: mmc5.pdf [file mmc5.pdf]

**Table S5**

| <b>probe</b> | <b>gene</b>  | <b>effect</b> | <b>p.val</b> | <b>FDR</b> |
|--------------|--------------|---------------|--------------|------------|
| 221588_x_at  | ALDH6A1      | -0.02714      | 4.53E-11     | 5.04E-07   |
| 209173_at    | AGR2         | 0.045107      | 3.61E-11     | 5.04E-07   |
| 221589_s_at  | LOC100506517 | -0.02625      | 4.82E-09     | 6.67E-06   |
| 209460_at    | ABAT         | -0.02618      | 5.51E-08     | 3.15E-05   |
| 206254_at    | EGF          | -0.04219      | 2.91E-10     | 2.16E-06   |
| 214274_s_at  | ACAA1        | -0.02035      | 3.43E-08     | 2.32E-05   |
| 219076_s_at  | PXMP2        | -0.02103      | 2.99E-09     | 6.65E-06   |
| 220094_s_at  | CCDC90A      | -0.01477      | 2.29E-09     | 6.13E-06   |
| 201963_at    | ACSL1        | -0.01963      | 2.91E-08     | 2.09E-05   |
| 203908_at    | SLC4A4       | -0.02786      | 1.8E-08      | 1.43E-05   |
| 202108_at    | PEPD         | -0.02281      | 5.66E-07     | 0.000157   |
| 220507_s_at  | UPB1         | -0.03016      | 9.03E-07     | 0.000203   |
| 203159_at    | GLS          | -0.01415      | 3.29E-09     | 6.65E-06   |
| 203145_at    | SPAG5        | -0.02698      | 9.62E-08     | 4.66E-05   |
| 219527_at    | MOSC2        | -0.01886      | 4.28E-07     | 0.000131   |
| 203711_s_at  | HIBCH        | -0.02102      | 1.49E-08     | 1.34E-05   |
| 205244_s_at  | SLC13A3      | -0.02677      | 1.64E-05     | 0.00142    |
| 213374_x_at  | HIBCH        | -0.02104      | 1.48E-08     | 1.34E-05   |
| 209459_s_at  | ABAT         | -0.02623      | 3.08E-06     | 0.000461   |
| 203790_s_at  | HRSP12       | -0.02522      | 2.73E-07     | 0.000102   |
| 209123_at    | QDPR         | -0.02213      | 9.62E-07     | 0.000214   |
| 41577_at     | PPP1R16B     | -0.0241       | 4.42E-07     | 0.000131   |
| 204290_s_at  | ALDH6A1      | -0.02216      | 1.36E-07     | 6.1E-05    |
| 203335_at    | PHYH         | -0.02045      | 4.6E-09      | 6.67E-06   |
| 205243_at    | SLC13A3      | -0.03015      | 5.34E-06     | 0.000668   |
| 219281_at    | MSRA         | -0.01902      | 2.5E-06      | 0.000401   |
| 33494_at     | ETFDH        | -0.01586      | 3.46E-06     | 0.000505   |
| 210738_s_at  | SLC4A4       | -0.03294      | 1.5E-08      | 1.34E-05   |
| 205530_at    | ETFDH        | -0.01955      | 7.26E-09     | 8.29E-06   |
| 211552_s_at  | ALDH4A1      | -0.02475      | 1.8E-08      | 1.43E-05   |
| 213933_at    | PTGER3       | -0.02741      | 5.4E-09      | 6.68E-06   |
| 211569_s_at  | HADH         | -0.02361      | 2.89E-07     | 0.000103   |
| 200953_s_at  | CCND2        | 0.029963      | 6.68E-10     | 3.72E-06   |
| 211776_s_at  | EPB41L3      | -0.01898      | 4.38E-08     | 2.68E-05   |
| 204430_s_at  | SLC2A5       | -0.01977      | 0.000113     | 0.004854   |
| 206484_s_at  | XPNPEP2      | -0.02864      | 3.9E-05      | 0.002366   |
| 201036_s_at  | HADH         | -0.01924      | 7.29E-07     | 0.000178   |
| 215726_s_at  | CYB5A        | -0.01892      | 1.66E-08     | 1.42E-05   |
| 210619_s_at  | HYAL1        | -0.019        | 4.45E-08     | 2.68E-05   |
| 45288_at     | ABHD6        | -0.01877      | 6.61E-06     | 0.000784   |
| 202740_at    | ABHD14A      | -0.02736      | 5.72E-07     | 0.000157   |
| 205653_at    | CTSG         | 0.025339      | 4.57E-08     | 2.68E-05   |
| 206332_s_at  | IFI16        | 0.022464      | 4.31E-07     | 0.000131   |
| 205364_at    | ACOX2        | -0.02704      | 4.83E-06     | 0.000621   |
| 204289_at    | LOC100506517 | -0.02097      | 1.85E-06     | 0.000324   |
| 212741_at    | MAOA         | -0.01973      | 9.78E-07     | 0.000214   |
| 217874_at    | SUCLG1       | -0.01703      | 8.26E-08     | 4.28E-05   |

|             |          |           |          |          |
|-------------|----------|-----------|----------|----------|
| 214261_s_at | ADH6     | -0.01757  | 3.64E-05 | 0.002297 |
| 200961_at   | SEPHS2   | -0.01261  | 7.61E-08 | 4.13E-05 |
| 205355_at   | ACADSB   | -0.02397  | 5.09E-09 | 6.67E-06 |
| 206030_at   | ASPA     | -0.02366  | 2.61E-07 | 0.000101 |
| 221605_s_at | PIPOX    | -0.02617  | 1.07E-05 | 0.001079 |
| 205081_at   | CRIP1    | 0.029073  | 3.91E-08 | 2.49E-05 |
| 219161_s_at | CKLF     | 0.018189  | 1.74E-07 | 7.3E-05  |
| 214433_s_at | SELENBP1 | -0.02269  | 2.48E-09 | 6.13E-06 |
| 220075_s_at | CDHR5    | -0.02963  | 2.83E-05 | 0.001952 |
| 219739_at   | RNF186   | -0.02421  | 1.11E-05 | 0.001103 |
| 201349_at   | SLC9A3R1 | -0.01403  | 3.69E-06 | 0.00052  |
| 210739_x_at | SLC4A4   | -0.02011  | 9.94E-06 | 0.00103  |
| 205978_at   | KL       | -0.02954  | 1.78E-07 | 7.36E-05 |
| 205311_at   | DDC      | -0.02142  | 0.000124 | 0.00505  |
| 211138_s_at | KMO      | -0.02831  | 1.46E-06 | 0.000276 |
| 200952_s_at | CCND2    | 0.029532  | 1.39E-09 | 4.41E-06 |
| 209374_s_at | IGHM     | 0.028389  | 4.04E-05 | 0.002422 |
| 205380_at   | PDZK1    | -0.01115  | 1.75E-05 | 0.001458 |
| 208965_s_at | IFI16    | 0.023415  | 1.29E-06 | 0.000256 |
| 221636_s_at | MOSC2    | -0.01646  | 3.77E-06 | 0.000522 |
| 209667_at   | CES2     | -0.01427  | 2.67E-05 | 0.001889 |
| 203892_at   | WFDC2    | 0.027012  | 1.84E-06 | 0.000324 |
| 1405_i_at   | CCL5     | 0.030516  | 8.37E-07 | 0.000198 |
| 205757_at   | ENTPD5   | -0.01805  | 2.3E-05  | 0.001707 |
| 219732_at   | LPPR1    | -0.03142  | 8.73E-08 | 4.42E-05 |
| 218844_at   | ACSF2    | -0.01754  | 3.66E-05 | 0.002297 |
| 213657_s_at |          | -0.02343  | 7.49E-08 | 4.13E-05 |
| 206346_at   | PRLR     | -0.02545  | 3.28E-07 | 0.000112 |
| 201563_at   | SORD     | -0.0181   | 1.26E-05 | 0.001211 |
| 220801_s_at | HAO2     | -0.0305   | 5.31E-06 | 0.000668 |
| 207071_s_at | ACO1     | -0.0188   | 2.8E-06  | 0.000433 |
| 44696_at    | TBC1D13  | -0.01703  | 3.77E-06 | 0.000522 |
| 219902_at   | BHMT2    | -1.68E-02 | 0.00013  | 0.005223 |
| 202238_s_at | NNMT     | 0.032203  | 1.25E-06 | 0.000253 |
| 211494_s_at | SLC4A4   | -0.01707  | 5.24E-06 | 0.000663 |
| 221552_at   | ABHD6    | -0.01657  | 1.74E-05 | 0.001455 |
| 201288_at   | ARHGDI1B | 0.019987  | 6.60E-07 | 0.000169 |
| 206610_s_at | F11      | -0.02055  | 7.53E-07 | 0.00018  |
| 205307_s_at | KMO      | -0.02881  | 1.46E-06 | 0.000276 |
| 208966_x_at | IFI16    | 0.025843  | 3.85E-07 | 0.000126 |
| 209978_s_at | LPA      | -0.04267  | 5.17E-07 | 0.000148 |
| 217728_at   | S100A6   | 1.94E-02  | 2.8E-07  | 0.000102 |
| 203914_x_at | HPGD     | -0.03146  | 2.08E-08 | 1.6E-05  |
| 203435_s_at | MME      | -0.01611  | 0.00104  | 0.021378 |
| 212703_at   | TLN2     | -0.01466  | 0.00028  | 0.008836 |
| 218440_at   | MCCC1    | -0.01399  | 6.52E-07 | 0.000169 |
| 205489_at   | CRYM     | -0.01397  | 4.4E-05  | 0.002565 |
| 210046_s_at | IDH2     | -0.02125  | 3.71E-09 | 6.67E-06 |
| 203207_s_at | MTRF1    | -0.01757  | 6.13E-07 | 0.000163 |

|             |          |           |          |          |
|-------------|----------|-----------|----------|----------|
| 209605_at   | TST      | -0.01436  | 1.66E-05 | 0.001421 |
| 216381_x_at | AKR7A3   | -0.02982  | 1.07E-08 | 1.12E-05 |
| 210833_at   | PTGER3   | -0.02469  | 6.14E-07 | 0.000163 |
| 210084_x_at | TPSAB1   | 0.021134  | 8.29E-06 | 0.00091  |
| 201562_s_at | SORD     | -0.02191  | 2.32E-06 | 0.00038  |
| 212434_at   | GRPEL1   | -0.01525  | 1.53E-05 | 0.001365 |
| 207858_s_at | PKLR     | -0.0261   | 1.48E-05 | 0.001333 |
| 206878_at   | DAO      | -0.02618  | 3.68E-05 | 0.002297 |
| 219915_s_at | SLC16A10 | -0.01875  | 5.52E-05 | 0.002935 |
| 212750_at   | PPP1R16B | -0.0262   | 5.97E-06 | 0.000739 |
| 209977_at   | PLG      | -0.03395  | 2.71E-05 | 0.001909 |
| 205052_at   | AUH      | -0.01755  | 3.63E-08 | 2.38E-05 |
| 216474_x_at | TPSAB1   | 0.021003  | 1.42E-05 | 0.001304 |
| 210915_x_at | TRBC1    | 0.030247  | 7.85E-06 | 0.000869 |
| 213193_x_at | TRBC1    | 0.032932  | 2.28E-05 | 0.001707 |
| 205222_at   | EHHADH   | -0.01858  | 4.63E-06 | 0.000614 |
| 215363_x_at | FOLH1    | -0.02443  | 0.000224 | 0.00764  |
| 213624_at   | SMPDL3A  | -0.01817  | 1.78E-06 | 0.000317 |
| 202003_s_at | ACAA2    | -0.01406  | 9.84E-07 | 0.000214 |
| 208177_at   | SLC34A1  | -0.02384  | 0.000427 | 0.01149  |
| 211548_s_at | HPGD     | -0.03107  | 7.45E-09 | 8.29E-06 |
| 211712_s_at | ANXA9    | -0.01338  | 1.33E-05 | 0.001248 |
| 209366_x_at | CYB5A    | -0.01704  | 1.37E-07 | 6.1E-05  |
| 205750_at   | BPHL     | -0.02107  | 1.08E-07 | 5.13E-05 |
| 201193_at   | IDH1     | -0.01579  | 1.82E-05 | 0.001487 |
| 210832_x_at | PTGER3   | -0.01793  | 1.44E-06 | 0.000276 |
| 203433_at   | MTHFS    | -0.01343  | 1.54E-05 | 0.001365 |
| 219803_at   | ANGPTL3  | -0.02977  | 4.25E-05 | 0.002505 |
| 215559_at   | ABCC6    | -0.01855  | 0.000125 | 0.005089 |
| 206522_at   | MGAM     | -0.0179   | 0.000491 | 0.012622 |
| 222078_at   | PKLR     | -0.02002  | 4.72E-05 | 0.002692 |
| 214088_s_at | FUT3     | -0.01403  | 0.000824 | 0.018053 |
| 37590_g_at  |          | -0.02234  | 8.71E-07 | 0.000202 |
| 205216_s_at | APOH     | -0.02352  | 0.000654 | 0.015294 |
| 205624_at   | CPA3     | 0.026788  | 0.000149 | 0.005806 |
| 211796_s_at | TRBC1    | 0.03989   | 1.02E-05 | 0.001057 |
| 218102_at   | DERA     | -0.01389  | 1.4E-06  | 0.000276 |
| 207213_s_at | USP2     | -0.03456  | 8.76E-06 | 0.000934 |
| 210476_s_at | PRLR     | -0.02039  | 1.1E-05  | 0.001092 |
| 205860_x_at | FOLH1    | -0.02309  | 0.00047  | 0.012279 |
| 201135_at   | ECHS1    | -0.01655  | 4.26E-06 | 0.000572 |
| 202309_at   | MTHFD1   | -0.01376  | 1.27E-06 | 0.000254 |
| 219525_at   | SLC47A1  | -0.01469  | 0.00254  | 0.038965 |
| 211028_s_at | KHK      | -2.24E-02 | 6.59E-05 | 0.003375 |
| 206457_s_at | DIO1     | -0.02796  | 7.99E-05 | 0.003812 |
| 219298_at   | ECHDC3   | -0.01807  | 1.46E-06 | 0.000276 |
| 221590_s_at | ALDH6A1  | -0.02786  | 1.29E-07 | 5.96E-05 |
| 216910_at   | XPNPEP2  | -0.02887  | 0.000334 | 0.009836 |
| 209600_s_at | ACOX1    | -0.01721  | 4.52E-07 | 0.000132 |

|             |              |           |          |          |
|-------------|--------------|-----------|----------|----------|
| 210452_x_at | CYP4F2       | -0.02381  | 2E-05    | 0.001585 |
| 204834_at   | FGL2         | 0.022066  | 6.02E-07 | 0.000163 |
| 217023_x_at | TPSAB1       | 0.016745  | 9.17E-05 | 0.004161 |
| 202237_at   | NNMT         | 0.036512  | 4.42E-07 | 0.000131 |
| 220135_s_at | SLC7A9       | -0.01913  | 0.003326 | 0.046948 |
| 207843_x_at | CYB5A        | -0.01456  | 8.95E-07 | 0.000203 |
| 213603_s_at | RAC2         | 0.02418   | 9.57E-08 | 4.66E-05 |
| 202025_x_at | ACAA1        | -0.01604  | 3.54E-05 | 0.002279 |
| 200947_s_at | GLUD1        | -0.01883  | 1.11E-08 | 1.12E-05 |
| 205675_at   | MTPP         | -0.02797  | 6.57E-05 | 0.003375 |
| 211890_x_at | CAPN3        | -2.27E-02 | 0.000119 | 0.005003 |
| 202436_s_at | CYP1B1       | 0.028252  | 6.33E-07 | 0.000166 |
| 204704_s_at | ALDOB        | -0.02792  | 8.33E-05 | 0.003939 |
| 202847_at   | PCK2         | -0.01995  | 2.74E-05 | 0.001922 |
| 220148_at   | ALDH8A1      | -0.01473  | 0.001466 | 0.026929 |
| 219188_s_at | MACROD1      | -0.01628  | 9.03E-07 | 0.000203 |
| 205306_x_at | KMO          | -0.0284   | 1.55E-05 | 0.001373 |
| 214033_at   | ABCC6        | -0.02087  | 2.13E-05 | 0.001626 |
| 202902_s_at | CTSS         | 0.020191  | 0.000144 | 0.005648 |
| 200946_x_at | GLUD1        | -0.01423  | 3.09E-07 | 0.000108 |
| 220186_s_at | CDHR2        | -0.01335  | 0.001091 | 0.021973 |
| 205983_at   | DPEP1        | -0.02122  | 3.2E-05  | 0.002143 |
| 201034_at   | ADD3         | -0.01245  | 2.29E-06 | 0.000379 |
| 218392_x_at | SFXN1        | -0.01183  | 2.62E-05 | 0.001876 |
| 222001_x_at | LOC728855    | 0.012164  | 1.68E-07 | 7.18E-05 |
| 201931_at   | ETFA         | -0.01599  | 4.34E-07 | 0.000131 |
| 200951_s_at | CCND2        | 0.013625  | 1.23E-05 | 0.001182 |
| 202447_at   | DECR1        | -0.01053  | 1.61E-06 | 0.000299 |
| 204588_s_at | SLC7A7       | -0.01742  | 0.001338 | 0.025239 |
| 221004_s_at | ITM2C        | 0.023858  | 1.44E-06 | 0.000276 |
| 204528_s_at | NAP1L1       | 0.010023  | 7.94E-08 | 4.21E-05 |
| 205412_at   | ACAT1        | -0.01608  | 1.78E-05 | 0.001464 |
| 201012_at   | ANXA1        | 0.026793  | 2.05E-06 | 0.00035  |
| 212456_at   | KIAA0664     | -0.00969  | 3.25E-05 | 0.00217  |
| 208885_at   | LCP1         | 0.017014  | 0.000636 | 0.015061 |
| 203725_at   | GADD45A      | -0.01226  | 5.13E-05 | 0.002846 |
| 205760_s_at | OGG1         | -0.01441  | 7.72E-05 | 0.003739 |
| 205673_s_at | ASB9         | -0.01706  | 0.000121 | 0.00502  |
| 214681_at   | GK           | -0.01646  | 0.000417 | 0.011358 |
| 203924_at   | GSTA1        | -0.02823  | 1.6E-05  | 0.001406 |
| 203647_s_at | FDX1         | -0.01497  | 1.38E-09 | 4.41E-06 |
| 204565_at   | ACOT13       | -0.01568  | 6.08E-06 | 0.000748 |
| 206840_at   | AFM          | -0.02521  | 0.000647 | 0.015176 |
| 215772_x_at | SUCLG2       | -2.26E-02 | 1.14E-09 | 4.41E-06 |
| 204224_s_at | GCH1         | -0.01926  | 1.74E-05 | 0.001455 |
| 212701_at   | TLN2         | -0.01589  | 0.00135  | 0.025436 |
| 213705_at   | LOC100509558 | -0.01011  | 3.69E-05 | 0.002297 |
| 203385_at   | DGKA         | 0.029871  | 1E-06    | 0.000214 |
| 204118_at   | CD48         | 0.02882   | 0.000116 | 0.004917 |

|             |          |           |          |          |
|-------------|----------|-----------|----------|----------|
| 205896_at   | SLC22A4  | -0.01687  | 0.000378 | 0.010664 |
| 204137_at   | GPR137B  | -0.01886  | 1.46E-05 | 0.001325 |
| 219789_at   | NPR3     | -2.03E-02 | 9.72E-05 | 0.004338 |
| 220727_at   | KCNK10   | -0.01311  | 0.001743 | 0.030263 |
| 214389_at   | SLC5A12  | -0.02356  | 0.00054  | 0.013522 |
| 207444_at   | SLC22A13 | -0.01219  | 0.001971 | 0.032797 |
| 221210_s_at | NPL      | -0.02453  | 4.97E-05 | 0.002787 |
| 201136_at   | PLP2     | 0.023302  | 1.23E-06 | 0.000251 |
| 211465_x_at | FUT6     | -0.0128   | 0.000518 | 0.013099 |
| 200807_s_at | HSPD1    | -0.00897  | 3.04E-06 | 0.000458 |
| 203971_at   | SLC31A1  | -0.01321  | 3.6E-06  | 0.000511 |
| 214475_x_at | CAPN3    | -0.0216   | 0.000198 | 0.00703  |
| 202590_s_at | PDK2     | -0.01833  | 6.27E-05 | 0.003244 |
| 217973_at   | DCXR     | -0.02639  | 2.79E-07 | 0.000102 |
| 214434_at   | HSPA12A  | -0.01351  | 4.03E-05 | 0.00242  |
| 210343_s_at | SLC22A6  | -0.02009  | 0.000583 | 0.014201 |
| 211231_x_at | CYP4A11  | -0.02093  | 0.001009 | 0.020849 |
| 203814_s_at | NQO2     | -0.02073  | 3.68E-05 | 0.002297 |
| 217235_x_at | IGLL5    | 0.02733   | 2.08E-05 | 0.001618 |
| 207407_x_at | CYP4A11  | -0.01783  | 0.000428 | 0.011492 |
| 203474_at   | IQGAP2   | -0.0229   | 3.56E-07 | 0.000118 |
| 206469_x_at | AKR7A3   | -0.02359  | 9.71E-06 | 0.00102  |
| 204142_at   | ENOSF1   | -0.01884  | 1.54E-06 | 0.000289 |
| 218960_at   | TMPRSS4  | 0.020492  | 2.23E-06 | 0.000373 |
| 206514_s_at | CYP4F2   | -0.0235   | 0.000283 | 0.008882 |
| 209623_at   | MCCC2    | -0.01541  | 2.39E-06 | 0.000386 |
| 204655_at   | CCL5     | 0.022214  | 8.97E-06 | 0.000952 |
| 214170_x_at | FH       | -0.0145   | 3.4E-08  | 2.32E-05 |
| 214776_x_at | XYLB     | -0.01773  | 7.96E-05 | 0.003807 |
| 220740_s_at | SLC12A6  | -0.00968  | 0.003286 | 0.046602 |
| 203929_s_at | MAPT     | -0.01498  | 0.001207 | 0.023508 |
| 205488_at   | GZMA     | 0.02574   | 5.42E-05 | 0.002932 |
| 220310_at   | TUBAL3   | -0.01799  | 0.001428 | 0.02638  |
| 217483_at   | FOLH1    | -1.50E-02 | 0.001336 | 0.025219 |
| 220604_x_at | FTCD     | -0.01962  | 0.000489 | 0.012585 |
| 219054_at   | C5orf23  | -0.01698  | 0.000326 | 0.009737 |
| 205221_at   | HGD      | -0.01615  | 9.79E-06 | 0.001023 |
| 214231_s_at | KIAA0564 | -0.0134   | 5.78E-05 | 0.003045 |
| 204606_at   | CCL21    | 0.027844  | 8.72E-06 | 0.000934 |
| 201137_s_at | HLA-DPB1 | 0.027452  | 3.51E-06 | 0.000505 |
| 206515_at   | CYP4F3   | -0.0212   | 0.000409 | 0.01122  |
| 205798_at   | IL7R     | 0.028523  | 4.74E-06 | 0.000618 |
| 205044_at   | GABRP    | 0.014638  | 0.000613 | 0.014716 |
| 202957_at   | HCLS1    | 0.020879  | 1.80E-04 | 0.006645 |
| 204232_at   | FCER1G   | 0.021423  | 0.000419 | 0.011383 |
| 212459_x_at | SUCLG2   | -0.02156  | 4.68E-09 | 6.67E-06 |
| 206492_at   | FHIT     | -0.01472  | 8.01E-05 | 0.003815 |
| 203860_at   | PCCA     | -0.00986  | 4.93E-05 | 0.002771 |
| 204705_x_at | ALDOB    | -0.02263  | 0.000167 | 0.006326 |

|             |              |           |          |          |
|-------------|--------------|-----------|----------|----------|
| 210839_s_at | ENPP2        | -0.01123  | 0.002829 | 0.042019 |
| 210852_s_at | AASS         | -0.01198  | 1.1E-05  | 0.001092 |
| 213566_at   | RNASE6       | 0.021932  | 2.78E-05 | 0.001939 |
| 211582_x_at | LST1         | 0.017536  | 0.000265 | 0.008493 |
| 207761_s_at | METTL7A      | -0.00952  | 6.14E-05 | 0.003204 |
| 211303_x_at | FOLH1B       | -0.01843  | 0.003604 | 0.049505 |
| 218596_at   | TBC1D13      | -0.01698  | 1.33E-05 | 0.001246 |
| 204780_s_at | FAS          | 0.017506  | 6.19E-06 | 0.000758 |
| 214470_at   | KLRB1        | 0.0173    | 0.000196 | 0.007022 |
| 209550_at   | NDN          | 0.012315  | 2.28E-05 | 0.001707 |
| 216223_at   | CPN2         | -0.01845  | 0.002719 | 0.040846 |
| 206710_s_at | EPB41L3      | -0.01771  | 7.26E-06 | 0.000838 |
| 209671_x_at | TRAC         | 0.016777  | 0.000357 | 0.010283 |
| 210375_at   | PTGER3       | -0.02065  | 2.05E-05 | 0.001605 |
| 208369_s_at | GCDH         | -0.01989  | 5.71E-06 | 0.000711 |
| 214763_at   | ACOT11       | -0.01596  | 6.28E-05 | 0.003244 |
| 205208_at   | ALDH1L1      | -0.02256  | 1.62E-06 | 0.000299 |
| 207134_x_at | TPSB2        | 0.016873  | 0.000176 | 0.006554 |
| 220671_at   | CCRN4L       | -0.02123  | 3.15E-06 | 0.000468 |
| 207339_s_at | LTB          | 0.017814  | 1.35E-05 | 0.001254 |
| 200768_s_at | MAT2A        | -0.00906  | 0.000135 | 0.005387 |
| 207277_at   | CD209        | 0.023347  | 1.78E-06 | 0.000317 |
| 211645_x_at |              | 0.035489  | 2.36E-05 | 0.00173  |
| 210972_x_at | TRAC         | 0.02228   | 2.06E-05 | 0.001608 |
| 203775_at   | SLC25A13     | -0.01652  | 3.42E-05 | 0.002239 |
| 200644_at   | MARCKSL1     | 0.018717  | 8.42E-07 | 0.000198 |
| 221648_s_at | LOC100507192 | -0.01618  | 0.000671 | 0.015596 |
| 203416_at   | CD53         | 0.025605  | 0.000201 | 0.007095 |
| 219176_at   | C2orf47      | -0.0119   | 1.62E-05 | 0.001406 |
| 211643_x_at | IGK@         | 0.034757  | 7.53E-06 | 0.000855 |
| 213264_at   | PCBP2        | -1.14E-02 | 4.27E-06 | 0.000572 |
| 218487_at   | ALAD         | -0.01372  | 0.000375 | 0.0106   |
| 200691_s_at | HSPA9        | -0.01301  | 4.73E-06 | 0.000618 |
| 203476_at   | TPBG         | 0.018716  | 1.61E-05 | 0.001406 |
| 207741_x_at | TPSAB1       | 0.018972  | 0.000299 | 0.009187 |
| 204388_s_at | MAOA         | -0.02723  | 7.46E-07 | 0.00018  |
| 221627_at   | TRIM10       | -0.0169   | 0.000229 | 0.007731 |
| 212714_at   | LARP4        | -0.01346  | 2.26E-05 | 0.001707 |
| 209083_at   | CORO1A       | 0.01883   | 6.21E-05 | 0.003229 |
| 201666_at   | TIMP1        | 0.033119  | 2.5E-07  | 9.96E-05 |
| 202446_s_at | PLSCR1       | 0.013385  | 0.000121 | 0.005029 |
| 204057_at   | IRF8         | 0.018149  | 3.48E-06 | 0.000505 |
| 214203_s_at | PRODH        | -0.0199   | 5.59E-07 | 0.000157 |
| 209522_s_at | CRAT         | -0.01629  | 0.000278 | 0.00879  |
| 213706_at   | GPD1         | -0.02112  | 0.001667 | 0.029373 |
| 211298_s_at | ALB          | -0.03325  | 0.000222 | 0.007611 |
| 211902_x_at | TRD@         | 0.017431  | 3.86E-05 | 0.002361 |
| 202834_at   | AGT          | -0.01656  | 0.000738 | 0.016646 |
| 220061_at   | ACSM5        | -0.01688  | 0.001277 | 0.024497 |

|             |              |          |          |          |
|-------------|--------------|----------|----------|----------|
| 206259_at   | PROC         | -0.01334 | 0.00357  | 0.049345 |
| 206094_x_at | UGT1A1       | -0.01473 | 0.001958 | 0.032642 |
| 210944_s_at | CAPN3        | -0.0193  | 0.000425 | 0.011444 |
| 206069_s_at | ACADL        | -0.01947 | 1.78E-05 | 0.001464 |
| 206775_at   | CUBN         | -0.02007 | 0.003047 | 0.044344 |
| 204044_at   | QPRT         | -0.0186  | 5.18E-05 | 0.002848 |
| 216903_s_at | CBARA1       | -0.01439 | 0.000116 | 0.004936 |
| 215784_at   | CD1E         | 0.028379 | 4.36E-05 | 0.002548 |
| 204836_at   | GLDC         | -0.01708 | 3.48E-05 | 0.002247 |
| 205074_at   | SLC22A5      | -0.01162 | 0.003244 | 0.046272 |
| 202898_at   | SDC3         | 0.013026 | 6.91E-05 | 0.003459 |
| 205498_at   | GHR          | -0.0192  | 2.63E-05 | 0.001878 |
| 204259_at   | MMP7         | 0.028544 | 7.66E-06 | 0.00086  |
| 209612_s_at | ADH1B        | 0.022535 | 0.000731 | 0.016546 |
| 34210_at    | CD52         | 0.035765 | 1.53E-05 | 0.001365 |
| 221058_s_at | CKLF         | 0.015019 | 1.18E-05 | 0.001155 |
| 206155_at   | ABCC2        | -0.01811 | 0.002022 | 0.033437 |
| 206119_at   | BHMT         | -0.01732 | 0.000619 | 0.014807 |
| 209249_s_at | GHITM        | -0.01254 | 2.05E-06 | 0.00035  |
| 212906_at   | GRAMD1B      | -0.01594 | 0.000239 | 0.007936 |
| 217022_s_at | IGHA1        | 0.04601  | 1.63E-05 | 0.001416 |
| 211971_s_at | LRPPRC       | -0.01238 | 6.84E-07 | 0.000171 |
| 203021_at   | SLPI         | 0.033733 | 0.000126 | 0.005115 |
| 202920_at   | ANK2         | -0.01961 | 0.001313 | 0.024891 |
| 221305_s_at | UGT1A8       | -0.02195 | 0.002186 | 0.035349 |
| 210834_s_at | PTGER3       | -0.02626 | 3.92E-07 | 0.000126 |
| 200903_s_at | AHCY         | -0.01577 | 0.000315 | 0.009538 |
| 207238_s_at | PTPRC        | 0.027771 | 5.16E-05 | 0.002847 |
| 216438_s_at | TMSB4X       | 0.014857 | 0.000118 | 0.004965 |
| 205892_s_at | FABP1        | -0.02814 | 0.000766 | 0.01711  |
| 211366_x_at | CASP1        | 1.52E-02 | 0.000115 | 0.004917 |
| 200978_at   | MDH1         | -0.01491 | 9.88E-07 | 0.000214 |
| 213037_x_at | STAU1        | -0.00945 | 0.000244 | 0.008012 |
| 204502_at   | SAMHD1       | 0.020089 | 0.000174 | 0.006486 |
| 218245_at   | TSKU         | -0.01115 | 0.001985 | 0.032999 |
| 204143_s_at | ENOSF1       | -0.01556 | 3.43E-05 | 0.002239 |
| 211917_s_at | PRLR         | -0.01971 | 1.69E-05 | 0.001438 |
| 206065_s_at | DPYS         | -0.01788 | 0.000987 | 0.02055  |
| 210987_x_at | TPM1         | 0.01418  | 6.62E-06 | 0.000784 |
| 216708_x_at | LOC100287927 | 0.022044 | 0.000127 | 0.005115 |
| 210831_s_at | PTGER3       | -0.01736 | 1.29E-05 | 0.001223 |
| 203158_s_at | GLS          | -0.01462 | 2.53E-05 | 0.00182  |
| 217148_x_at |              | 0.031544 | 9.31E-05 | 0.004208 |
| 212432_at   | GRPEL1       | -0.01178 | 6.94E-05 | 0.003466 |
| 216092_s_at | SLC7A8       | -0.02184 | 0.000144 | 0.00564  |
| 214777_at   | IGKV4-1      | 0.023412 | 0.000125 | 0.005089 |
| 204348_s_at | AK4          | -0.01369 | 0.00025  | 0.008146 |
| 220753_s_at | CRYL1        | -0.01828 | 4.56E-05 | 0.002639 |
| 202053_s_at | ALDH3A2      | -0.01236 | 0.000572 | 0.01406  |

|             |           |           |          |          |
|-------------|-----------|-----------|----------|----------|
| 208747_s_at | C1S       | 0.025919  | 1.75E-06 | 0.000317 |
| 218597_s_at | CISD1     | -0.01071  | 2.37E-07 | 9.61E-05 |
| 216452_at   | TRPM3     | -1.61E-02 | 7.68E-06 | 0.00086  |
| 206296_x_at | MAP4K1    | 0.01525   | 0.000241 | 0.007957 |
| 214999_s_at | RAB11FIP3 | -0.0247   | 0.000195 | 0.00701  |
| 207017_at   | RAB27B    | 0.010713  | 0.000597 | 0.014409 |
| 207981_s_at | ESRRG     | -0.01598  | 1.72E-05 | 0.001448 |
| 208690_s_at | PDLIM1    | 0.020678  | 1.07E-06 | 0.000226 |
| 206527_at   | ABAT      | -0.02069  | 0.000372 | 0.01055  |
| 205214_at   | STK17B    | 0.018981  | 2.01E-05 | 0.001585 |
| 206500_s_at | C14orf106 | 0.017908  | 2.29E-05 | 0.001707 |
| 205012_s_at | HAGH      | -0.01572  | 3.44E-05 | 0.00224  |
| 213967_at   | RALYL     | -0.02285  | 0.000502 | 0.012819 |
| 213975_s_at | LYZ       | 0.023126  | 0.002671 | 0.040286 |
| 216733_s_at | GATM      | -0.01544  | 0.000111 | 0.004814 |
| 202598_at   | S100A13   | 0.018085  | 4.22E-06 | 0.000572 |
| 207126_x_at | UGT1A1    | -0.01368  | 0.002469 | 0.038103 |
| 202437_s_at | CYP1B1    | 0.020307  | 3.97E-05 | 0.0024   |
| 205683_x_at | TPSAB1    | 0.014059  | 0.003707 | 0.049961 |
| 205442_at   | MFAP3L    | -0.0163   | 2.58E-06 | 0.00041  |
| 216962_at   | RPAIN     | -0.01346  | 1.76E-06 | 0.000317 |
| 217257_at   | SH3BP2    | -0.01653  | 5.41E-05 | 0.002932 |
| 212883_at   | APOE      | -2.78E-02 | 5.5E-05  | 0.002935 |
| 38149_at    | ARHGAP25  | 0.024974  | 2.79E-06 | 0.000433 |
| 209827_s_at | IL16      | 0.016595  | 0.000485 | 0.012535 |
| 214916_x_at | IGHA1     | 0.019421  | 0.000999 | 0.020702 |
| 208816_x_at | ANXA2P2   | 0.013642  | 2.95E-05 | 0.00202  |
| 209309_at   | AZGP1     | -0.02222  | 0.001482 | 0.027059 |
| 206726_at   | HPGDS     | 0.016908  | 0.000862 | 0.018615 |
| 203851_at   | IGFBP6    | 0.02061   | 6.79E-05 | 0.003434 |
| 220357_s_at | SGK2      | -1.77E-02 | 4.34E-09 | 6.67E-06 |
| 210751_s_at | RGN       | -0.01824  | 1.78E-05 | 0.001464 |
| 216638_s_at | PRLR      | -0.02385  | 3.84E-05 | 0.002361 |
| 206978_at   | CCR2      | 0.014807  | 0.001158 | 0.022823 |
| 206325_at   | SERPINA6  | -0.01976  | 0.001304 | 0.024823 |
| 213864_s_at | NAP1L1    | 0.007928  | 5.92E-05 | 0.0031   |
| 202748_at   | GBP2      | 0.022268  | 7.52E-06 | 0.000855 |
| 203423_at   | RBP1      | 0.014668  | 0.000218 | 0.007512 |
| 205987_at   | CD1C      | 0.027458  | 1.79E-05 | 0.001467 |
| 214022_s_at | IFITM1    | 0.0243    | 3.59E-05 | 0.002293 |
| 212510_at   | GPD1L     | -0.01526  | 6.78E-07 | 0.000171 |
| 217157_x_at | IGK@      | 0.024366  | 7.77E-05 | 0.003748 |
| 216365_x_at | IGLV3-19  | 0.012001  | 0.000432 | 0.011543 |
| 216207_x_at | IGKC      | 0.028215  | 0.000121 | 0.00502  |
| 207142_at   | KCNJ3     | -0.02132  | 6.96E-07 | 0.000172 |
| 215125_s_at | UGT1A1    | -0.01383  | 0.002342 | 0.036983 |
| 203546_at   | IPO13     | -0.01391  | 3.00E-05 | 0.002042 |
| 219268_at   | ETNK2     | -0.01748  | 0.000172 | 0.006438 |
| 201668_x_at | MARCKS    | 0.011477  | 0.000346 | 0.010103 |



|             |          |          |          |          |
|-------------|----------|----------|----------|----------|
| 206011_at   | CASP1    | 0.017873 | 0.000458 | 0.012051 |
| 209685_s_at | PRKCB    | 0.0182   | 8.66E-05 | 0.004044 |
| 210374_x_at | PTGER3   | -0.01466 | 0.000117 | 0.004965 |
| 200657_at   | SLC25A5  | -0.01033 | 2.59E-06 | 0.00041  |
| 215785_s_at | CYFIP2   | -0.01533 | 4.24E-05 | 0.002505 |
| 219215_s_at | SLC39A4  | -0.01406 | 0.001612 | 0.028583 |
| 214574_x_at | LST1     | 0.016548 | 0.001649 | 0.02914  |
| 215217_at   | IGKC     | 4.43E-02 | 5.2E-05  | 0.002852 |
| 215210_s_at | DLST     | -0.01372 | 4.77E-06 | 0.000618 |
| 205175_s_at | KHK      | -0.01365 | 0.002445 | 0.037976 |
| 211644_x_at | IGK@     | 0.042647 | 2.41E-05 | 0.001756 |
| 216576_x_at | IGK@     | 0.033055 | 0.000212 | 0.007367 |
| 212231_at   | FBXO21   | -0.01034 | 0.000481 | 0.012475 |
| 215646_s_at | VCAN     | 0.037108 | 7.91E-05 | 0.003789 |
| 213140_s_at | SS18L1   | -0.01107 | 0.00119  | 0.023314 |
| 209493_at   | PDZD2    | -0.01697 | 0.000614 | 0.014716 |
| 212588_at   | PTPRC    | 0.019762 | 0.000328 | 0.009752 |
| 208948_s_at | STAU1    | -0.0106  | 0.000421 | 0.011421 |
| 210072_at   | CCL19    | 0.026469 | 0.000267 | 0.008524 |
| 221870_at   | EHD2     | 0.018795 | 8.54E-05 | 0.004012 |
| 212911_at   | DNAJC16  | -0.01198 | 0.001135 | 0.022481 |
| 202784_s_at | NNT      | -0.01254 | 2.33E-05 | 0.001716 |
| 212656_at   | TSMF     | -0.01296 | 1.9E-06  | 0.000331 |
| 201279_s_at | DAB2     | -0.00979 | 0.001568 | 0.027975 |
| 210031_at   | CD247    | 0.011327 | 0.000334 | 0.009836 |
| 204620_s_at | VCAN     | 0.029658 | 1.67E-05 | 0.001423 |
| 212592_at   | IGJ      | 0.04005  | 6.76E-05 | 0.003429 |
| 207705_s_at | NINL     | -0.01577 | 2.02E-05 | 0.001588 |
| 209897_s_at | SLIT2    | -0.01389 | 0.000122 | 0.005029 |
| 212503_s_at | DIP2C    | -0.01422 | 0.000603 | 0.014494 |
| 204174_at   | ALOX5AP  | 0.020708 | 0.000727 | 0.016529 |
| 218275_at   | SLC25A10 | -0.01483 | 7.79E-06 | 0.000868 |
| 220642_x_at | GPR89A   | -0.01181 | 0.001505 | 0.027366 |
| 221679_s_at | ABHD6    | -0.02062 | 0.000421 | 0.011419 |
| 206704_at   | CLCN5    | -0.01418 | 2.31E-05 | 0.001707 |
| 207184_at   | SLC6A13  | -0.01148 | 0.001843 | 0.031357 |
| 211597_s_at | HOPX     | 0.022407 | 0.000971 | 0.020325 |
| 210451_at   | PKLR     | -0.02134 | 0.000267 | 0.008526 |
| 214321_at   | NOV      | 0.019067 | 5.57E-05 | 0.002953 |
| 207387_s_at | GK       | -0.01585 | 0.000159 | 0.006078 |
| 211368_s_at | CASP1    | 0.018863 | 0.000525 | 0.01323  |
| 213503_x_at | ANXA2    | 0.017831 | 2.12E-05 | 0.001625 |
| 212230_at   | PPAP2B   | -0.01185 | 5.6E-05  | 0.002963 |
| 219543_at   | PBLD     | -0.0116  | 0.00014  | 0.005513 |
| 218931_at   | RAB17    | -0.0115  | 3.76E-05 | 0.002336 |
| 38158_at    | ESPL1    | -0.01187 | 0.000323 | 0.009702 |
| 215176_x_at | IGK@     | 0.045299 | 1.93E-05 | 0.00155  |
| 204319_s_at | RGS10    | 0.014503 | 0.000348 | 0.010113 |
| 204959_at   | MNDA     | 0.018003 | 0.003377 | 0.047497 |

|             |              |           |          |          |
|-------------|--------------|-----------|----------|----------|
| 214490_at   | ARSF         | -0.01404  | 0.001898 | 0.031957 |
| 201242_s_at | ATP1B1       | -0.01492  | 4.16E-07 | 0.000131 |
| 202746_at   | ITM2A        | 0.018968  | 1.86E-05 | 0.001511 |
| 206535_at   | SLC2A2       | -0.01904  | 0.002952 | 0.04332  |
| 213133_s_at | GCSH         | -0.01337  | 6.68E-06 | 0.000784 |
| 213539_at   | CD3D         | 0.021813  | 0.000122 | 0.005029 |
| 202830_s_at | SLC37A4      | -0.01114  | 0.003629 | 0.049598 |
| 206846_s_at | HDAC6        | -0.01614  | 0.00024  | 0.007944 |
| 207320_x_at | STAU1        | -0.00879  | 0.000771 | 0.017178 |
| 217028_at   | CXCR4        | 0.028174  | 2.33E-05 | 0.001716 |
| 205039_s_at | IKZF1        | 0.016182  | 0.000422 | 0.011428 |
| 212908_at   | DNAJC16      | -0.02246  | 0.000333 | 0.009836 |
| 201670_s_at | MARCKS       | 0.014079  | 0.000131 | 0.005236 |
| 209624_s_at | MCCC2        | -0.01381  | 2.67E-05 | 0.001889 |
| 215382_x_at | LOC100507804 | 0.016915  | 0.000855 | 0.018504 |
| 210786_s_at | FLI1         | 0.014997  | 1.61E-05 | 0.001406 |
| 203033_x_at | FH           | -0.01136  | 1.27E-05 | 0.001211 |
| 213626_at   | CBR4         | -0.01027  | 0.000106 | 0.004682 |
| 218546_at   | C1orf115     | -0.01054  | 0.001494 | 0.027237 |
| 203178_at   | GATM         | -0.01506  | 0.000647 | 0.015176 |
| 209301_at   | CA2          | -0.01853  | 2.11E-05 | 0.001623 |
| 211999_at   | H3F3B        | 0.006688  | 0.000174 | 0.006486 |
| 210399_x_at | FUT6         | -0.01129  | 0.000434 | 0.011574 |
| 218661_at   | NAT15        | -1.32E-02 | 0.000481 | 0.012475 |
| 205343_at   | SULT1C2      | -0.01449  | 2.64E-07 | 0.000101 |
| 201347_x_at | GRHPR        | -0.01369  | 0.000587 | 0.014271 |
| 204037_at   | LPAR1        | 0.018945  | 0.000202 | 0.007111 |
| 209696_at   | FBP1         | -0.01926  | 0.000479 | 0.012444 |
| 204116_at   | IL2RG        | 0.024135  | 8.76E-05 | 0.004067 |
| 207275_s_at | ACSL1        | -0.01516  | 0.001045 | 0.021402 |
| 219607_s_at | MS4A4A       | 0.024313  | 5.47E-05 | 0.002935 |
| 202733_at   | P4HA2        | -0.01254  | 0.002327 | 0.036902 |
| 218870_at   | ARHGAP15     | 0.023727  | 0.000222 | 0.007611 |
| 210825_s_at | PEBP1        | -0.00685  | 6.26E-06 | 0.000762 |
| 214973_x_at | IGHD         | 0.030045  | 7.44E-05 | 0.003656 |
| 211641_x_at | IGHA1        | 0.016737  | 0.000374 | 0.010599 |
| 207076_s_at | ASS1         | -0.01575  | 0.001896 | 0.031955 |
| 212465_at   | SETD3        | -0.00851  | 0.000459 | 0.012066 |
| 207567_at   | SLC13A2      | -0.01709  | 0.000123 | 0.005049 |
| 211571_s_at | VCAN         | 0.030526  | 0.000289 | 0.009014 |
| 208678_at   | ATP6V1E1     | -0.00664  | 0.000168 | 0.006354 |
| 213440_at   | RAB1A        | -0.0083   | 0.000177 | 0.006554 |
| 209835_x_at | CD44         | 0.024194  | 5.14E-05 | 0.002846 |
| 202614_at   | SLC30A9      | -0.00838  | 1.04E-05 | 0.001064 |
| 202960_s_at | MUT          | -0.01368  | 7.91E-06 | 0.000872 |
| 206925_at   | ST8SIA4      | 0.015007  | 0.000145 | 0.005658 |
| 210757_x_at | DAB2         | -0.00971  | 0.001309 | 0.024851 |
| 205291_at   | IL2RB        | 0.01468   | 3.9E-05  | 0.002366 |
| 213332_at   | PAPPA2       | 0.024262  | 1.07E-05 | 0.001079 |

|             |          |           |          |          |
|-------------|----------|-----------|----------|----------|
| 219307_at   | PDSS2    | -1.10E-02 | 0.000305 | 0.009286 |
| 209094_at   | DDAH1    | -0.00815  | 0.000125 | 0.005099 |
| 201891_s_at | B2M      | 0.007455  | 0.000318 | 0.009607 |
| 217966_s_at | FAM129A  | 0.020695  | 4.98E-05 | 0.002787 |
| 218656_s_at | LHFP     | 0.015779  | 0.00169  | 0.029689 |
| 217512_at   | KNG1     | -0.02318  | 3.78E-05 | 0.002338 |
| 205329_s_at | SNX4     | -0.00726  | 7.89E-05 | 0.003788 |
| 215388_s_at | CFH      | 0.025553  | 9.84E-06 | 0.001025 |
| 215966_x_at | GK3P     | -0.01679  | 0.000855 | 0.018504 |
| 214456_x_at | SAA1     | 0.012968  | 0.002724 | 0.040871 |
| 206068_s_at | ACADL    | -0.01122  | 0.002951 | 0.04332  |
| 218699_at   | RAB7L1   | -1.28E-02 | 0.002025 | 0.033437 |
| 217138_x_at |          | 0.043064  | 0.000122 | 0.005029 |
| 212874_at   | APOE     | -0.01537  | 0.000196 | 0.007022 |
| 216318_at   | IGHA1    | 0.015982  | 8.93E-05 | 0.004091 |
| 203671_at   | TPMT     | -0.00966  | 0.003206 | 0.046016 |
| 212568_s_at | DLAT     | -0.01707  | 7.31E-06 | 0.000839 |
| 201035_s_at | HADH     | -0.02014  | 9.46E-06 | 0.000999 |
| 203471_s_at | PLEK     | 0.019624  | 6.41E-05 | 0.003296 |
| 214181_x_at | LST1     | 0.017146  | 0.001273 | 0.024439 |
| 214696_at   | C17orf91 | -0.01387  | 0.000285 | 0.008914 |
| 200793_s_at | ACO2     | -0.02305  | 1.19E-05 | 0.001155 |
| 214864_s_at | GRHPR    | -0.01203  | 0.000332 | 0.009836 |
| 204774_at   | EVI2A    | 0.022326  | 0.000619 | 0.014807 |
| 216542_x_at | IGHA1    | 0.027743  | 0.000103 | 0.004567 |
| 202825_at   | SLC25A4  | -0.01432  | 2.91E-07 | 0.000103 |
| 202217_at   | C21orf33 | -0.01603  | 4.1E-05  | 0.002451 |
| 218025_s_at | PECI     | -1.47E-02 | 8.8E-05  | 0.004077 |
| 204347_at   | AK4      | -0.01665  | 0.000642 | 0.015156 |
| 216565_x_at |          | 0.018277  | 4.44E-06 | 0.000593 |
| 211742_s_at | EVI2B    | 0.021926  | 0.000279 | 0.008824 |
| 215719_x_at | FAS      | 0.02143   | 2.35E-06 | 0.000381 |
| 211919_s_at | CXCR4    | 0.026607  | 0.000166 | 0.006279 |
| 201590_x_at | ANXA2    | 0.019276  | 2.46E-05 | 0.001778 |
| 216224_s_at | HDAC6    | -0.01066  | 0.000188 | 0.006833 |
| 211430_s_at | IGHG1    | 0.04648   | 5.04E-05 | 0.002807 |
| 221041_s_at | SLC17A5  | -0.00976  | 0.003309 | 0.046858 |
| 204829_s_at | FOLR2    | 0.02115   | 1.48E-05 | 0.001333 |
| 207497_s_at | MS4A2    | 1.25E-02  | 0.001566 | 0.027946 |
| 203645_s_at | CD163    | 0.018011  | 0.000728 | 0.016541 |
| 205882_x_at | ADD3     | -0.01011  | 0.00038  | 0.010701 |
| 217260_x_at | IGHG1    | 0.02764   | 0.000204 | 0.007168 |
| 212175_s_at | AK2      | -0.01184  | 8.75E-06 | 0.000934 |
| 205939_at   | CYP3A7   | -0.02062  | 0.000363 | 0.010375 |
| 204661_at   | CD52     | 0.029233  | 0.00025  | 0.008146 |
| 210427_x_at | ANXA2    | 0.017723  | 3.33E-05 | 0.002199 |
| 214768_x_at | IGKV1-5  | 0.024092  | 0.000844 | 0.01835  |
| 203208_s_at | MTRF1    | -0.01216  | 0.000151 | 0.005854 |
| 217378_x_at |          | 0.027555  | 0.000215 | 0.007444 |

|             |          |          |          |          |
|-------------|----------|----------|----------|----------|
| 201939_at   | PLK2     | 0.01742  | 3.73E-06 | 0.000522 |
| 203402_at   | KCNAB2   | -0.01032 | 0.003596 | 0.049478 |
| 219243_at   | GIMAP4   | 0.015067 | 0.000205 | 0.007169 |
| 212587_s_at | PTPRC    | 0.029913 | 3.58E-05 | 0.002293 |
| 218322_s_at | ACSL5    | 0.014394 | 2.77E-08 | 2.06E-05 |
| 209686_at   | S100B    | 0.014124 | 5.01E-05 | 0.002794 |
| 217772_s_at | MTCH2    | -0.01231 | 1.71E-05 | 0.001444 |
| 202890_at   | MAP7     | -0.01281 | 7.67E-05 | 0.003724 |
| 203256_at   | CDH3     | 0.01699  | 0.000233 | 0.007812 |
| 206363_at   | MAF      | -0.01511 | 0.000774 | 0.017211 |
| 203922_s_at | CYBB     | 0.018516 | 0.001473 | 0.026977 |
| 218272_at   | TTC38    | -0.01314 | 0.000443 | 0.011753 |
| 206366_x_at | XCL1     | 0.012492 | 0.001828 | 0.031223 |
| 221891_x_at | HSPA8    | -0.00429 | 0.000957 | 0.020132 |
| 202295_s_at | CTSH     | -0.00976 | 0.002646 | 0.039986 |
| 212470_at   | SPAG9    | -0.01072 | 0.000108 | 0.004751 |
| 214453_s_at | IFI44    | 0.017708 | 0.000272 | 0.008647 |
| 207544_s_at | ADH6     | -0.01684 | 0.003692 | 0.049934 |
| 208950_s_at | ALDH7A1  | -0.01189 | 0.001222 | 0.02371  |
| 201720_s_at | LAPTM5   | 0.017459 | 0.002059 | 0.033918 |
| 208296_x_at | TNFAIP8  | 0.01587  | 2.08E-05 | 0.001618 |
| 218285_s_at | BDH2     | -0.01166 | 3.87E-05 | 0.002364 |
| 222271_at   |          | 0.022812 | 2.19E-06 | 0.00037  |
| 215633_x_at | LST1     | 0.012651 | 0.002855 | 0.042309 |
| 217752_s_at | CNDP2    | -0.00717 | 0.00071  | 0.016253 |
| 209368_at   | EPHX2    | -0.01905 | 0.000111 | 0.004803 |
| 201714_at   | TUBG1    | -0.01304 | 0.001357 | 0.025438 |
| 217248_s_at | SLC7A8   | -0.02245 | 0.002942 | 0.04326  |
| 203221_at   | TLE1     | 0.015831 | 0.000118 | 0.004965 |
| 201426_s_at | VIM      | 0.016689 | 0.000131 | 0.005223 |
| 216557_x_at | IGHA1    | 0.027397 | 0.000577 | 0.014097 |
| 211734_s_at | FCER1A   | 0.025082 | 0.000411 | 0.01125  |
| 202502_at   | ACADM    | -0.0184  | 4.78E-05 | 0.002719 |
| 216984_x_at | IGLV2-23 | 0.018616 | 0.000418 | 0.011382 |
| 201721_s_at | LAPTM5   | 0.020134 | 0.001227 | 0.023788 |
| 201313_at   | ENO2     | 0.024162 | 3.5E-06  | 0.000505 |
| 218511_s_at | PNPO     | -0.01898 | 3.56E-06 | 0.000509 |
| 203979_at   | CYP27A1  | -0.0093  | 0.003497 | 0.048561 |
| 222020_s_at | NTM      | 0.016735 | 0.000621 | 0.014823 |
| 205890_s_at | GABBR1   | 0.014506 | 0.001082 | 0.021881 |
| 213724_s_at | PDK2     | -0.01802 | 0.000629 | 0.014952 |
| 203672_x_at | TPMT     | -0.00815 | 0.000342 | 0.01001  |
| 202889_x_at | MAP7     | -0.01529 | 0.000131 | 0.005223 |
| 218552_at   | ECHDC2   | -0.0128  | 4.81E-05 | 0.002724 |
| 216853_x_at | IGLV3-19 | 0.013871 | 0.000682 | 0.015748 |
| 204264_at   | CPT2     | -0.00945 | 0.002435 | 0.03793  |
| 221731_x_at | VCAN     | 0.031793 | 4.73E-05 | 0.002692 |
| 212681_at   | EPB41L3  | -0.01926 | 1.14E-06 | 0.000238 |
| 203543_s_at | KLF9     | -0.01669 | 0.000372 | 0.01055  |

|             |              |          |          |          |
|-------------|--------------|----------|----------|----------|
| 204304_s_at | PROM1        | 0.03537  | 1.49E-07 | 6.52E-05 |
| 208997_s_at | UCP2         | 0.018843 | 0.000623 | 0.014854 |
| 208813_at   | GOT1         | -0.01367 | 6.91E-05 | 0.003459 |
| 202752_x_at | SLC7A8       | -0.02496 | 0.000246 | 0.008033 |
| 204951_at   | RHOH         | 0.01609  | 0.002539 | 0.038965 |
| 204490_s_at | CD44         | 0.022639 | 0.000164 | 0.006221 |
| 204971_at   | CSTA         | 0.018505 | 0.00155  | 0.027821 |
| 215121_x_at | IGLC7        | 0.037391 | 0.000121 | 0.00502  |
| 52940_at    | LOC100294402 | -0.01474 | 0.000348 | 0.010106 |
| 213738_s_at | ATP5A1       | -0.00954 | 7.51E-05 | 0.003687 |
| 209201_x_at | CXCR4        | 0.026544 | 0.000231 | 0.007745 |
| 203923_s_at | CYBB         | 0.015842 | 0.002161 | 0.035087 |
| 210260_s_at | TNFAIP8      | 0.016111 | 3.02E-05 | 0.002051 |
| 201391_at   | TRAP1        | -0.01243 | 1.19E-05 | 0.001155 |
| 213002_at   | MARCKS       | 0.013751 | 0.00023  | 0.007745 |
| 213501_at   | ACOX1        | -0.01642 | 7.56E-05 | 0.0037   |
| 217503_at   | STK17B       | 0.019899 | 0.000325 | 0.009727 |
| 217127_at   | CTH          | -0.02056 | 2.43E-05 | 0.001765 |
| 204824_at   | ENDOG        | -0.01299 | 4.32E-05 | 0.00254  |
| 202266_at   | TDP2         | -0.01649 | 7.05E-06 | 0.000818 |
| 204882_at   | ARHGAP25     | 0.021707 | 1.13E-05 | 0.001112 |
| 212203_x_at | IFITM3       | 0.019334 | 0.000222 | 0.007611 |
| 206089_at   | NELL1        | -0.01509 | 0.002466 | 0.038097 |
| 201425_at   | ALDH2        | -0.0134  | 2.24E-06 | 0.000373 |
| 219840_s_at | TCL6         | -0.01331 | 0.001794 | 0.030879 |
| 211615_s_at | LRPPRC       | -0.01235 | 2.96E-05 | 0.00202  |
| 201968_s_at | PGM1         | -0.01006 | 0.00051  | 0.012963 |
| 206991_s_at | CCR5         | 0.016011 | 0.000177 | 0.006562 |
| 209138_x_at | IGL@         | 0.041532 | 8.84E-05 | 0.00408  |
| 216866_s_at | COL14A1      | 0.016427 | 0.001902 | 0.031961 |
| 216865_at   | COL14A1      | 0.015221 | 0.000619 | 0.014807 |
| 205448_s_at | MAP3K12      | -0.01111 | 0.000719 | 0.016404 |
| 210390_s_at | CCL14-CCL15  | -0.01833 | 0.001864 | 0.03157  |
| 203157_s_at | GLS          | -0.0135  | 0.000625 | 0.014887 |
| 32091_at    | SLC25A44     | -0.0096  | 0.000889 | 0.019035 |
| 213564_x_at | LDHB         | -0.00638 | 3.17E-05 | 0.002131 |
| 216308_x_at | GRHPR        | -0.01287 | 0.000896 | 0.019145 |
| 217281_x_at | IGHA1        | 0.026317 | 0.000333 | 0.009836 |
| 213454_at   | APITD1       | -0.01412 | 4.13E-05 | 0.00246  |
| 201030_x_at | LDHB         | -0.00661 | 6.9E-05  | 0.003459 |
| 214669_x_at | IGKC         | 0.036344 | 0.000121 | 0.00502  |
| 211881_x_at | IGLJ3        | 0.021015 | 0.000351 | 0.010163 |
| 201848_s_at | BNIP3        | -0.01399 | 2.82E-06 | 0.000433 |
| 215049_x_at | CD163        | 0.017773 | 0.001902 | 0.031961 |
| 202923_s_at | GCLC         | -0.01597 | 2.3E-05  | 0.001707 |
| 212014_x_at | CD44         | 0.02165  | 2.72E-05 | 0.001909 |
| 201432_at   | CAT          | -0.01212 | 0.000295 | 0.009127 |
| 220951_s_at | A1CF         | -0.01835 | 0.003621 | 0.049573 |
| 219191_s_at | BIN2         | 1.12E-02 | 0.0031   | 0.044899 |

|             |         |          |          |          |
|-------------|---------|----------|----------|----------|
| 210986_s_at | TPM1    | 0.016817 | 8.51E-06 | 0.000929 |
| 220303_at   | PDZD3   | -0.01186 | 0.001407 | 0.026125 |
| 221875_x_at | HLA-F   | 0.015937 | 5.46E-05 | 0.002935 |
| 205786_s_at | ITGAM   | 0.023036 | 1.66E-05 | 0.001421 |
| 204220_at   | GMFG    | 0.022472 | 8.91E-05 | 0.004091 |
| 206263_at   | FMO4    | -0.01458 | 0.000589 | 0.014284 |
| 207211_at   | USP2    | -0.02088 | 0.000395 | 0.01098  |
| 203913_s_at | HPGD    | -0.02687 | 6.5E-06  | 0.000779 |
| 201667_at   | GJA1    | 0.020754 | 7.43E-05 | 0.003656 |
| 206952_at   | G6PC    | -0.02215 | 0.002698 | 0.040605 |
| 213813_x_at |         | -0.00709 | 0.000461 | 0.012093 |
| 216489_at   | TRPM3   | -0.01487 | 0.001508 | 0.02737  |
| 211075_s_at | CD47    | 0.012943 | 0.000226 | 0.007678 |
| 209670_at   | TRAC    | 0.012283 | 0.000423 | 0.011428 |
| 209708_at   | MOXD1   | 0.025859 | 0.000182 | 0.006664 |
| 203682_s_at | IVD     | -0.01595 | 2.27E-05 | 0.001707 |
| 213524_s_at | G0S2    | -0.01471 | 1.03E-05 | 0.00106  |
| 213293_s_at | TRIM22  | 0.015323 | 0.001361 | 0.025465 |
| 211794_at   | FYB     | 0.0186   | 0.00023  | 0.007745 |
| 202772_at   | HMGCL   | -0.01535 | 1.91E-05 | 0.001534 |
| 214268_s_at | MTMR4   | -0.00865 | 0.003667 | 0.049878 |
| 204489_s_at | CD44    | 0.025266 | 0.000354 | 0.010229 |
| 218976_at   | DNAJC12 | -0.01559 | 0.001735 | 0.030161 |
| 210754_s_at | LYN     | 0.014626 | 0.000382 | 0.010746 |
| 211633_x_at |         | 0.01827  | 0.000511 | 0.012979 |
| 211640_x_at | IGHG1   | 0.018008 | 0.000602 | 0.014493 |
| 216609_at   | TXN     | -0.01131 | 2.09E-05 | 0.001619 |
| 209970_x_at | CASP1   | 0.014439 | 0.003662 | 0.049831 |
| 202307_s_at | TAP1    | 0.015353 | 8.72E-06 | 0.000934 |
| 211843_x_at | CYP3A7  | -0.01681 | 0.001059 | 0.021572 |
| 218084_x_at | FXDY5   | 0.019188 | 0.001067 | 0.021705 |
| 221675_s_at | CHPT1   | -0.01291 | 0.000231 | 0.007746 |
| 209513_s_at | HSDL2   | -0.01263 | 3.27E-05 | 0.002172 |
| 207571_x_at | C1orf38 | 0.014111 | 0.000493 | 0.012678 |
| 217036_at   |         | 0.017002 | 0.000328 | 0.009752 |
| 213365_at   | ERI2    | -0.01404 | 8.86E-05 | 0.00408  |
| 218700_s_at | RAB7L1  | -0.01604 | 0.000936 | 0.019809 |
| 211798_x_at | IGLJ3   | 0.018629 | 0.001361 | 0.025465 |
| 221524_s_at | RRAGD   | -0.01687 | 3.51E-07 | 0.000118 |
| 211918_x_at | PAPPA2  | 0.02304  | 0.000193 | 0.006967 |
| 201695_s_at | PNP     | -0.01826 | 0.000123 | 0.00505  |
| 209248_at   | GHITM   | -0.00846 | 2.85E-06 | 0.000435 |
| 214332_s_at | TSFM    | -0.01309 | 0.000194 | 0.006999 |
| 216604_s_at | SLC7A8  | -0.02022 | 0.000904 | 0.019251 |
| 207018_s_at | RAB27B  | 0.012913 | 0.000585 | 0.014255 |
| 203761_at   | SLA     | 0.016744 | 0.000835 | 0.018181 |
| 211005_at   | LAT     | 0.017992 | 0.000285 | 0.008914 |
| 204385_at   | KYNU    | -0.01529 | 0.002431 | 0.037897 |
| 209563_x_at | CALM1   | -0.00538 | 0.000911 | 0.019371 |

|             |          |           |          |          |
|-------------|----------|-----------|----------|----------|
| 213587_s_at | ATP6V0E2 | -0.01774  | 1.43E-05 | 0.001311 |
| 211367_s_at | CASP1    | 0.018874  | 0.000336 | 0.009864 |
| 216179_x_at |          | -0.01019  | 0.00126  | 0.024264 |
| 212531_at   | LCN2     | 0.019803  | 0.001506 | 0.027366 |
| 210140_at   | CST7     | 0.018629  | 0.000341 | 0.010002 |
| 217967_s_at | FAM129A  | 0.017012  | 0.000148 | 0.005781 |
| 219113_x_at | HSD17B14 | -0.01261  | 0.001479 | 0.027033 |
| 202862_at   | FAH      | -0.01721  | 0.000876 | 0.018814 |
| 209614_at   | ADH1B    | 0.014604  | 0.001725 | 0.030041 |
| 206024_at   | HPD      | -0.02988  | 0.000894 | 0.019107 |
| 218684_at   | LRRC8D   | -1.04E-02 | 0.000403 | 0.01114  |
| 209514_s_at | RAB27A   | 0.01625   | 0.000559 | 0.013841 |
| 209576_at   | GNAI1    | 0.016629  | 5.16E-05 | 0.002847 |
| 201926_s_at | CD55     | 0.016541  | 1.44E-05 | 0.001312 |
| 209646_x_at | ALDH1B1  | -0.00952  | 0.000228 | 0.007713 |
| 218194_at   | REXO2    | -0.00907  | 5.4E-05  | 0.002932 |
| 206584_at   | LY96     | 0.022595  | 0.000397 | 0.011011 |
| 204294_at   | AMT      | -0.01194  | 0.000488 | 0.012574 |
| 201739_at   | SGK1     | -0.01009  | 0.000638 | 0.015076 |
| 221601_s_at | FAIM3    | 0.020461  | 4.43E-05 | 0.002575 |
| 214000_s_at | RGS10    | 0.02021   | 0.0003   | 0.009212 |
| 202783_at   | NNT      | -0.01453  | 0.000238 | 0.007921 |
| 217167_x_at | GK       | -0.01578  | 0.002735 | 0.040928 |
| 201319_at   | MYL12A   | 0.00583   | 0.001133 | 0.022453 |
| 206983_at   | CCR6     | 0.014914  | 4.67E-05 | 0.002687 |
| 203500_at   | GCDH     | -0.01309  | 0.001306 | 0.024828 |
| 219554_at   | RHCG     | -0.021    | 0.000393 | 0.010949 |
| 218455_at   | NFS1     | -0.01139  | 0.000103 | 0.004571 |
| 208998_at   | UCP2     | 0.016314  | 0.001676 | 0.029522 |
| 40273_at    | SPHK2    | -0.01164  | 0.003016 | 0.044028 |
| 210045_at   | IDH2     | -0.02057  | 0.000182 | 0.006664 |
| 215783_s_at | ALPL     | -0.01581  | 0.001698 | 0.029746 |
| 209732_at   | CLEC2B   | 0.020547  | 0.00073  | 0.016546 |
| 213113_s_at | SLC43A3  | 0.0113    | 0.000393 | 0.010949 |
| 214307_at   | HGD      | -0.01299  | 0.00011  | 0.004803 |
| 221006_s_at | SNX27    | -0.01101  | 0.003275 | 0.046534 |
| 217251_x_at |          | 0.027057  | 0.000468 | 0.012239 |
| 211795_s_at | FYB      | 0.014326  | 0.00211  | 0.034463 |
| 221666_s_at | PYCARD   | 0.015425  | 0.000432 | 0.011543 |
| 204328_at   | TMC6     | 0.013372  | 7.81E-05 | 0.003758 |
| 203663_s_at | COX5A    | -0.00926  | 6.69E-06 | 0.000784 |
| 217480_x_at | IGKC     | 0.023128  | 0.000442 | 0.011732 |
| 218182_s_at | CLDN1    | 0.027381  | 3.31E-06 | 0.000488 |
| 212382_at   | TCF4     | 0.021211  | 1.39E-05 | 0.001288 |
| 203608_at   | ALDH5A1  | -0.0183   | 0.000424 | 0.011444 |
| 210992_x_at | FCGR2C   | 9.25E-03  | 0.003628 | 0.049598 |
| 209757_s_at | MYCN     | -0.01752  | 0.000366 | 0.010442 |
| 217014_s_at | AZGP1    | -0.02377  | 0.002306 | 0.036697 |
| 200872_at   | S100A10  | 0.012241  | 0.000142 | 0.005581 |

|             |           |          |          |          |
|-------------|-----------|----------|----------|----------|
| 204041_at   | MAOB      | -0.01119 | 0.002873 | 0.042474 |
| 211470_s_at | SULT1C2   | -0.01453 | 4.76E-06 | 0.000618 |
| 204222_s_at | GLIPR1    | 0.014838 | 0.002209 | 0.035548 |
| 217977_at   | SEPX1     | -0.01478 | 0.001768 | 0.030605 |
| 204476_s_at | PC        | -0.01273 | 0.000475 | 0.012379 |
| 212067_s_at | C1R       | 0.02104  | 7.59E-06 | 0.000859 |
| 211549_s_at | HPGD      | -0.01447 | 2.64E-05 | 0.001878 |
| 202242_at   | TSPAN7    | -0.01144 | 0.001526 | 0.027545 |
| 207141_s_at | KCNJ3     | -0.01712 | 6.63E-05 | 0.003386 |
| 217238_s_at | ALDOB     | -0.01842 | 0.0018   | 0.030894 |
| 205988_at   | CD84      | 0.010318 | 0.001324 | 0.025074 |
| 213377_x_at | RPS12     | 0.008054 | 0.000486 | 0.012535 |
| 214677_x_at | IGLV1-44  | 0.043516 | 9.56E-05 | 0.004278 |
| 204785_x_at | IFNAR2    | 0.011379 | 0.000222 | 0.007613 |
| 217733_s_at | TMSB10    | 0.01993  | 0.000171 | 0.006411 |
| 201752_s_at | ADD3      | -0.00902 | 0.000793 | 0.017519 |
| 218632_at   | HECTD3    | -0.00779 | 0.001046 | 0.021402 |
| 203508_at   | TNFRSF1B  | 0.013028 | 0.000545 | 0.013568 |
| 211755_s_at | ATP5F1    | -0.01015 | 1.17E-06 | 0.000242 |
| 216252_x_at | FAS       | 0.018196 | 1.28E-05 | 0.001223 |
| 209966_x_at | ESRRG     | -0.01155 | 0.001689 | 0.029689 |
| 215379_x_at | IGLC7     | 0.032959 | 0.000322 | 0.009698 |
| 203438_at   | STC2      | -0.01621 | 0.001947 | 0.032544 |
| 204038_s_at | LPAR1     | 0.021191 | 3.19E-05 | 0.002138 |
| 44790_s_at  | C13orf18  | 0.022179 | 0.000256 | 0.008302 |
| 204447_at   | ProSAPiP1 | -0.01087 | 0.003291 | 0.046636 |
| 205676_at   | CYP27B1   | -0.02327 | 0.00343  | 0.048025 |
| 219014_at   | PLAC8     | 0.021777 | 0.000293 | 0.009068 |
| 204389_at   | MAOA      | -0.02069 | 8.63E-05 | 0.004039 |
| 201315_x_at | IFITM2    | 0.023573 | 0.000116 | 0.004917 |
| 201849_at   | BNIP3     | -0.01467 | 1.05E-05 | 0.001065 |
| 202196_s_at | DKK3      | 0.018755 | 2.82E-06 | 0.000433 |
| 212683_at   | SLC25A44  | -0.00907 | 0.002515 | 0.038722 |
| 210947_s_at | MSH3      | -0.0103  | 0.002588 | 0.039509 |
| 210116_at   | SH2D1A    | 0.018745 | 0.00124  | 0.023981 |
| 216401_x_at |           | 0.019145 | 0.001059 | 0.021572 |
| 206385_s_at | ANK3      | -0.00797 | 0.000499 | 0.012767 |
| 216491_x_at | IGHM      | 2.65E-02 | 0.001775 | 0.030671 |
| 217767_at   | C3        | 0.022524 | 0.001557 | 0.027879 |
| 208012_x_at | SP110     | 0.011372 | 0.000686 | 0.015815 |
| 218716_x_at | MTO1      | -0.01042 | 0.000207 | 0.007239 |
| 220723_s_at | CWH43     | -0.01753 | 0.001215 | 0.023616 |
| 201601_x_at | IFITM1    | 0.020646 | 0.000186 | 0.006764 |
| 203039_s_at | NDUFS1    | -0.01616 | 8.76E-06 | 0.000934 |
| 210356_x_at | MS4A1     | 0.021999 | 0.002334 | 0.036972 |
| 216852_x_at | IGL@      | 0.015966 | 0.001853 | 0.03146  |
| 204501_at   | NOV       | 0.011506 | 0.000111 | 0.004803 |
| 201645_at   | TNC       | 0.021872 | 7.66E-05 | 0.003724 |
| 212967_x_at | NAP1L1    | 0.008326 | 0.00016  | 0.006119 |



|             |           |          |          |          |
|-------------|-----------|----------|----------|----------|
| 221256_s_at | HDHD3     | -0.02042 | 0.000102 | 0.004554 |
| 215036_at   |           | 0.014604 | 0.003653 | 0.049798 |
| 201719_s_at | EPB41L2   | 0.016476 | 5.17E-06 | 0.000658 |
| 211991_s_at | HLA-DPA1  | 0.021536 | 0.000573 | 0.014065 |
| 220002_at   | KIF26B    | 0.011924 | 3.46E-05 | 0.002241 |
| 217762_s_at | RAB31     | 0.012256 | 0.003688 | 0.049934 |
| 203186_s_at | S100A4    | 0.021489 | 0.00017  | 0.00639  |
| 203609_s_at | ALDH5A1   | -0.01516 | 3.68E-05 | 0.002297 |
| 201415_at   | GSS       | -0.01233 | 2.8E-05  | 0.001943 |
| 216024_at   | DNM2      | -0.00784 | 0.002691 | 0.040527 |
| 210951_x_at | RAB27A    | 0.014617 | 0.003354 | 0.047198 |
| 206600_s_at | SLC16A5   | 0.013162 | 0.000695 | 0.015961 |
| 207044_at   | THRБ      | -0.01059 | 0.000258 | 0.008322 |
| 204698_at   | ISG20     | 0.019784 | 0.000153 | 0.005925 |
| 221656_s_at | ARHGEF10L | -0.00844 | 0.001212 | 0.023578 |
| 203964_at   | NMI       | 0.009728 | 0.002709 | 0.040753 |
| 202803_s_at | ITGB2     | 0.018587 | 0.000213 | 0.007376 |
| 209992_at   | PFKFB2    | -0.02082 | 8.86E-05 | 0.00408  |
| 218099_at   | TEX2      | -0.01096 | 0.000686 | 0.015815 |
| 202435_s_at | CYP1B1    | 0.017536 | 0.000176 | 0.006554 |
| 214836_x_at | IGK@      | 0.02903  | 0.000352 | 0.010175 |
| 204846_at   | CP        | 0.019869 | 0.001892 | 0.031929 |
| 219722_s_at | GDPD3     | -0.01567 | 0.001334 | 0.025204 |
| 215471_s_at | MAP7      | -0.01509 | 0.000156 | 0.006021 |
| 220554_at   | SLC22A7   | -0.0116  | 0.001662 | 0.029307 |
| 211002_s_at | TRIM29    | 0.009031 | 0.002918 | 0.042964 |
| 220376_at   | LRRС19    | -0.01523 | 0.001882 | 0.031811 |
| 202026_at   | SDHD      | -0.0178  | 4.74E-07 | 0.000137 |
| 217984_at   | RNASET2   | 0.011255 | 0.000815 | 0.017883 |
| 210785_s_at | C1orf38   | 0.013416 | 0.000993 | 0.020638 |
| 203791_at   | DMXL1     | -0.01196 | 2.85E-05 | 0.001957 |
| 219632_s_at | TRPV1     | -0.01076 | 0.003662 | 0.049831 |
| 205353_s_at | PEBP1     | -0.00981 | 0.00032  | 0.009657 |
| 205234_at   | SLC16A4   | -0.01121 | 0.001264 | 0.024304 |
| 205231_s_at | EPM2A     | -0.01181 | 0.001425 | 0.026364 |
| 211864_s_at | MYOF      | 0.013504 | 0.00154  | 0.027735 |
| 219103_at   | ASAP3     | -0.0178  | 1.3E-05  | 0.00123  |
| 205512_s_at | AIFM1     | -0.0135  | 0.002262 | 0.036179 |
| 203042_at   | LAMP2     | -0.01319 | 0.000986 | 0.02055  |
| 211505_s_at | STAU1     | -0.01505 | 0.000735 | 0.016612 |
| 217583_at   | PAH       | -0.01855 | 0.002463 | 0.03808  |
| 208383_s_at | PCK1      | -0.02037 | 0.000335 | 0.009848 |
| 206545_at   | CD28      | 0.014215 | 0.000178 | 0.006593 |
| 202087_s_at | CTSL1     | -0.00874 | 0.001119 | 0.02236  |
| 204279_at   | PSMB9     | 0.022163 | 1.89E-05 | 0.001531 |
| 204436_at   | PLEKHO2   | 0.010408 | 0.001052 | 0.021485 |
| 216510_x_at | IGHA1     | 0.022909 | 0.000592 | 0.014338 |
| 201619_at   | PRDX3     | -0.01132 | 6.98E-06 | 0.000814 |
| 203594_at   | RTCD1     | -0.00968 | 0.000242 | 0.007968 |

|             |          |           |          |          |
|-------------|----------|-----------|----------|----------|
| 211650_x_at | IGHA1    | 0.020721  | 0.002204 | 0.035529 |
| 201007_at   | HADHB    | -0.00927  | 7.33E-05 | 0.00363  |
| 33304_at    | ISG20    | 0.016351  | 0.00087  | 0.018742 |
| 209003_at   | SLC25A11 | -0.01492  | 2.31E-05 | 0.001707 |
| 212387_at   | TCF4     | 0.016277  | 3.97E-05 | 0.0024   |
| 218921_at   | SIGIRR   | -0.01182  | 0.000763 | 0.01709  |
| 220999_s_at | CYFIP2   | -0.01394  | 8.72E-05 | 0.004064 |
| 209916_at   | DHTKD1   | -0.02116  | 0.000839 | 0.018263 |
| 211986_at   | AHNAK    | 0.013423  | 0.000201 | 0.0071   |
| 207709_at   | PRKAA2   | -0.01011  | 9.39E-05 | 0.004225 |
| 210916_s_at | CD44     | 0.024358  | 0.000404 | 0.011151 |
| 205267_at   | POU2AF1  | 0.029579  | 0.000265 | 0.008493 |
| 221981_s_at | WDR59    | -0.01129  | 0.003491 | 0.04851  |
| 220773_s_at | GPHN     | -0.01603  | 0.001386 | 0.025825 |
| 221651_x_at | IGK@     | 0.038341  | 0.000198 | 0.007046 |
| 212063_at   | CD44     | 0.023529  | 0.000665 | 0.015519 |
| 213801_x_at | RPSA     | 0.007815  | 0.000439 | 0.011658 |
| 205159_at   | CSF2RB   | 0.019337  | 0.000353 | 0.010197 |
| 217911_s_at | BAG3     | -0.01632  | 0.000259 | 0.008347 |
| 204067_at   | SUOX     | -0.01642  | 5.29E-05 | 0.002883 |
| 202207_at   | ARL4C    | 0.028688  | 3.81E-05 | 0.002348 |
| 201489_at   | PPIF     | -0.01074  | 2.47E-05 | 0.001781 |
| 221932_s_at | GLRX5    | -0.01138  | 6.39E-06 | 0.000769 |
| 209833_at   | CRADD    | -0.01115  | 5.7E-05  | 0.003008 |
| 200632_s_at | NDRG1    | -0.00699  | 3.58E-03 | 0.049424 |
| 214424_s_at | ALDOB    | -0.02743  | 0.002113 | 0.03448  |
| 206116_s_at | TPM1     | 0.011928  | 0.000112 | 0.004842 |
| 207007_at   | NR1I3    | -0.01899  | 0.000138 | 0.005484 |
| 203779_s_at | MPZL2    | 0.013412  | 0.000412 | 0.011251 |
| 202949_s_at | FHL2     | 0.021283  | 1.21E-05 | 0.001171 |
| 221572_s_at | SLC26A6  | -0.01186  | 0.000298 | 0.009187 |
| 201858_s_at | SRGN     | 0.02344   | 0.000194 | 0.006999 |
| 217258_x_at | IGLV1-40 | 0.013854  | 0.002431 | 0.037897 |
| 212646_at   | RFTN1    | 0.013805  | 5.92E-05 | 0.0031   |
| 204781_s_at | FAS      | 0.010445  | 0.002732 | 0.040928 |
| 221163_s_at | MLXIPL   | -0.01095  | 5.93E-05 | 0.0031   |
| 218565_at   | C9orf114 | -1.51E-02 | 3.45E-05 | 0.002241 |
| 221671_x_at | IGK@     | 0.039037  | 0.000165 | 0.006269 |
| 202820_at   | AHR      | 0.01577   | 0.000645 | 0.015168 |
| 211649_x_at | IGHA1    | 0.011833  | 0.000601 | 0.014473 |
| 202735_at   | EBP      | -0.00933  | 0.000534 | 0.013418 |
| 215946_x_at | IGLL3P   | 0.020759  | 0.00067  | 0.01558  |
| 218983_at   | C1RL     | 0.010778  | 0.003436 | 0.048055 |
| 202747_s_at | ITM2A    | 0.020109  | 0.000152 | 0.005882 |
| 209795_at   | CD69     | 0.019261  | 0.003381 | 0.047515 |
| 203516_at   | SNTA1    | -0.00873  | 0.001393 | 0.025931 |
| 45297_at    | EHD2     | 0.012476  | 0.00182  | 0.031148 |
| 212647_at   | RRAS     | 0.011148  | 0.001692 | 0.029697 |
| 219159_s_at | SLAMF7   | 0.032708  | 0.003696 | 0.049934 |

|             |           |           |          |          |
|-------------|-----------|-----------|----------|----------|
| 211634_x_at | IGHM      | 0.025025  | 0.000773 | 0.0172   |
| 204563_at   | SELL      | 0.017014  | 0.00094  | 0.019839 |
| 219418_at   | NHEJ1     | -0.01146  | 0.000324 | 0.009727 |
| 209360_s_at | RUNX1     | 0.011477  | 0.001207 | 0.023508 |
| 201599_at   | OAT       | -0.01402  | 2.37E-05 | 0.001732 |
| 218167_at   | AMZ2      | -0.01064  | 7.05E-05 | 0.003514 |
| 209703_x_at | METTTL7A  | -0.00884  | 0.003224 | 0.046162 |
| 217940_s_at | CARKD     | -6.85E-03 | 0.001126 | 0.022453 |
| 219277_s_at | OGDHL     | -0.0146   | 0.000374 | 0.010599 |
| 208092_s_at | FAM49A    | 0.012544  | 0.00262  | 0.039752 |
| 208367_x_at | CYP3A4    | -0.0143   | 4.2E-05  | 0.002494 |
| 201212_at   | LGMM      | -0.01292  | 1.56E-03 | 0.027879 |
| 214791_at   | SP140L    | 0.014724  | 0.003581 | 0.049424 |
| 218633_x_at | ABHD10    | -0.01065  | 0.00301  | 0.043972 |
| 202982_s_at | ACOT1     | -0.01805  | 0.000849 | 0.018426 |
| 209191_at   | TUBB6     | 0.026508  | 2.98E-06 | 0.000451 |
| 203478_at   | NDUFC1    | -0.00966  | 2.1E-05  | 0.00162  |
| 219744_at   | FN3K      | -0.02157  | 0.000788 | 0.017425 |
| 206666_at   | GZMK      | 0.016818  | 0.001719 | 0.030024 |
| 213129_s_at | GCSH      | -0.01205  | 0.000127 | 0.005138 |
| 209823_x_at | HLA-DQB1  | 0.018984  | 0.000369 | 0.010509 |
| 204168_at   | MGST2     | -0.0064   | 0.003094 | 0.044843 |
| 205304_s_at | KCNJ8     | 0.017976  | 0.001442 | 0.02658  |
| 213591_at   | ALDH7A1   | -0.01341  | 0.001312 | 0.024888 |
| 209205_s_at | LMO4      | 0.012734  | 4.92E-05 | 0.002771 |
| 201682_at   | PMPCB     | -0.00965  | 5.51E-05 | 0.002935 |
| 216515_x_at | MIR1244-1 | 0.006387  | 0.001039 | 0.021369 |
| 219489_s_at | NXN       | 0.019799  | 1.14E-06 | 0.000238 |
| 213857_s_at | CD47      | 0.0098    | 0.003685 | 0.049934 |
| 210166_at   | TLR5      | 0.010721  | 0.002272 | 0.036287 |
| 205911_at   | PTH1R     | -0.01272  | 0.000694 | 0.01596  |
| 208083_s_at | ITGB6     | 0.029965  | 0.000239 | 0.007936 |
| 210653_s_at | BCKDHB    | -0.01667  | 0.000122 | 0.005029 |
| 210538_s_at | BIRC3     | 0.022404  | 6.3E-05  | 0.00325  |
| 201798_s_at | MYOF      | 0.014998  | 0.002142 | 0.034876 |
| 209118_s_at | TUBA1A    | 0.012178  | 0.002522 | 0.038776 |
| 219684_at   | RTP4      | 0.011794  | 0.000767 | 0.01711  |
| 203547_at   | CD4       | 0.011179  | 0.003695 | 0.049934 |
| 209613_s_at | ADH1B     | 0.023145  | 0.003418 | 0.047986 |
| 205350_at   | CRABP1    | -0.01605  | 0.000289 | 0.009014 |
| 177_at      | PLD1      | -0.0134   | 5.59E-04 | 0.013841 |
| 211639_x_at | IGHA1     | 0.015446  | 0.002423 | 0.037827 |
| 213861_s_at | FAM119B   | -0.01723  | 0.000237 | 0.007899 |
| 200832_s_at | SCD       | -0.02158  | 1.69E-03 | 0.029719 |
| 209005_at   | FBXL5     | -0.01476  | 0.000142 | 0.005574 |
| 215088_s_at | SDHC      | -0.00659  | 0.000117 | 0.004947 |
| 202403_s_at | COL1A2    | 0.020145  | 0.000411 | 0.011251 |
| 204185_x_at | PPID      | -0.00994  | 0.00012  | 0.005019 |
| 201105_at   | LGALS1    | 0.022358  | 0.000292 | 0.009066 |

|             |          |           |          |          |
|-------------|----------|-----------|----------|----------|
| 209645_s_at | ALDH1B1  | -0.01382  | 0.001462 | 0.026877 |
| 205501_at   | PDE10A   | -0.01909  | 0.000327 | 0.009752 |
| 200660_at   | S100A11  | 0.013412  | 0.00124  | 0.023981 |
| 214339_s_at | MAP4K1   | 0.011303  | 0.001131 | 0.022453 |
| 222138_s_at | WDR13    | -0.00897  | 0.001603 | 0.028484 |
| 207651_at   | GPR171   | 0.016184  | 0.002442 | 0.037955 |
| 207707_s_at | SEC13    | -0.00767  | 0.001862 | 0.031561 |
| 215300_s_at | FMO5     | -0.02495  | 3.07E-05 | 0.002076 |
| 213923_at   | RAP2B    | 0.013164  | 0.000571 | 0.01406  |
| 201540_at   | FHL1     | 0.017263  | 0.000356 | 0.010252 |
| 205942_s_at | ACSM3    | -0.01387  | 0.000876 | 0.018814 |
| 202947_s_at | GYPC     | 0.014368  | 0.00109  | 0.021973 |
| 214617_at   | PRF1     | 0.011309  | 0.001486 | 0.027108 |
| 217418_x_at | MS4A1    | 0.021929  | 0.002405 | 0.037657 |
| 202974_at   | MPP1     | -0.01622  | 0.000669 | 0.01558  |
| 217757_at   | A2M      | 0.019115  | 7.13E-05 | 0.003543 |
| 213658_at   |          | -0.01804  | 0.000183 | 0.006688 |
| 203066_at   | CHST15   | 0.022267  | 3.28E-05 | 0.002172 |
| 200655_s_at | CALM1    | -0.00636  | 3.18E-04 | 0.009607 |
| 200692_s_at | HSPA9    | -0.00834  | 8.76E-05 | 0.004067 |
| 206133_at   | XAF1     | 0.01239   | 0.002002 | 0.033262 |
| 219505_at   | CECR1    | 0.020002  | 0.000891 | 0.019075 |
| 211162_x_at | SCD      | -0.01375  | 9.56E-05 | 0.004278 |
| 209879_at   | SELPLG   | 0.010423  | 0.002422 | 0.037827 |
| 205963_s_at | DNAJA3   | -0.01117  | 0.00074  | 0.01668  |
| 44673_at    | SIGLEC1  | 1.27E-02  | 0.002017 | 0.033377 |
| 218676_s_at | PCTP     | -0.01657  | 5.5E-05  | 0.002935 |
| 201842_s_at | EFEMP1   | 0.01434   | 0.000229 | 0.007731 |
| 205751_at   | SH3GL2   | -0.0143   | 0.003213 | 0.046034 |
| 202310_s_at | COL1A1   | 0.019364  | 0.001522 | 0.027509 |
| 201612_at   | ALDH9A1  | -0.00941  | 0.000636 | 0.015061 |
| 205713_s_at | COMP     | 0.013516  | 0.001046 | 0.021402 |
| 201416_at   | SOX4     | 0.019191  | 2.84E-04 | 0.008897 |
| 201925_s_at | CD55     | 0.011689  | 1.47E-03 | 0.026981 |
| 211733_x_at | SCP2     | -0.00898  | 0.000362 | 0.010371 |
| 200708_at   | GOT2     | -0.01003  | 0.000162 | 0.00616  |
| 205194_at   | PSPH     | -0.01299  | 0.000983 | 0.020527 |
| 213940_s_at | FNBP1    | 0.007817  | 0.001635 | 0.028933 |
| 210085_s_at | ANXA9    | -0.01806  | 0.000456 | 0.012005 |
| 209584_x_at | APOBEC3C | 0.009384  | 0.000197 | 0.007022 |
| 204027_s_at | METTL1   | -0.0118   | 0.003026 | 0.044087 |
| 209310_s_at | CASP4    | 1.30E-02  | 7.35E-05 | 0.00363  |
| 206513_at   | AIM2     | 0.015856  | 0.003081 | 0.044714 |
| 213504_at   | COPS6    | -0.00955  | 0.00367  | 0.049885 |
| 218254_s_at | SAR1B    | -1.29E-02 | 0.00011  | 0.004803 |
| 209278_s_at | TFPI2    | 0.025212  | 0.000225 | 0.007643 |
| 219788_at   | PILRA    | 0.010418  | 0.000269 | 0.008562 |
| 217808_s_at | MAPKAP1  | -0.0131   | 5.23E-05 | 0.002861 |
| 205270_s_at | LCP2     | 0.018237  | 0.00184  | 0.031347 |

|             |          |          |          |          |
|-------------|----------|----------|----------|----------|
| 214829_at   | AASS     | -0.01588 | 0.003065 | 0.044539 |
| 202427_s_at | BRP44    | -0.0074  | 0.000588 | 0.01428  |
| 202864_s_at | SP100    | 0.009626 | 0.001074 | 0.021769 |
| 202054_s_at | ALDH3A2  | -0.01306 | 0.001402 | 0.026043 |
| 208770_s_at | EIF4EBP2 | -0.00634 | 0.001264 | 0.024304 |
| 210377_at   | ACSM3    | -0.01595 | 0.00289  | 0.042657 |
| 202382_s_at | GNPDA1   | -0.01172 | 0.000829 | 0.018103 |
| 204604_at   | CDK14    | -0.00957 | 0.002873 | 0.042474 |
| 201428_at   | CLDN4    | 0.015751 | 0.00147  | 0.026962 |
| 204019_s_at | SH3YL1   | -0.01235 | 0.000987 | 0.02055  |
| 217944_at   | POMGNT1  | -0.00788 | 0.000712 | 0.016293 |
| 213181_s_at | MOCS1    | -0.00984 | 0.002191 | 0.035374 |
| 202930_s_at | SUCLA2   | -0.01612 | 2.06E-06 | 0.00035  |
| 218897_at   | TMEM177  | -0.01183 | 0.001514 | 0.02744  |
| 214214_s_at | C1QBP    | -0.01047 | 0.000347 | 0.010106 |
| 200896_x_at | HDGF     | -0.00444 | 0.001203 | 0.023508 |
| 201280_s_at | DAB2     | -0.01098 | 3.66E-03 | 0.049831 |
| 200653_s_at | CALM1    | -0.00514 | 2.51E-03 | 3.86E-02 |
| 212386_at   | TCF4     | 0.016138 | 3.59E-05 | 0.002293 |
| 205369_x_at | DBT      | -0.01247 | 0.001035 | 0.02134  |
| 208909_at   | UQCRFS1  | -0.01018 | 0.000304 | 0.009272 |
| 221516_s_at | SMCR7L   | -0.01202 | 0.002127 | 0.034654 |
| 208084_at   | ITGB6    | 0.030495 | 0.000641 | 0.015138 |
| 204629_at   | PARVB    | -0.01157 | 0.002472 | 0.038103 |
| 209443_at   | SERPINA5 | -0.0151  | 0.003643 | 0.049734 |
| 215076_s_at | COL3A1   | 0.021352 | 0.002064 | 0.033981 |
| 201339_s_at | SCP2     | -0.01065 | 0.000178 | 0.006589 |
| 34726_at    | CACNB3   | 0.009504 | 0.001812 | 0.03108  |
| 212558_at   | SPRY1    | 0.015321 | 0.001944 | 0.032515 |
| 218677_at   | S100A14  | 0.010407 | 0.002619 | 0.039752 |
| 206687_s_at | PTPN6    | 0.011461 | 0.000347 | 0.010106 |
| 201669_s_at | MARCKS   | 0.014754 | 0.001425 | 0.026364 |
| 202018_s_at | LTF      | 0.037979 | 0.000404 | 0.011151 |
| 206085_s_at | CTH      | -0.01073 | 0.002338 | 0.036983 |
| 217792_at   | SNX5     | -0.00982 | 0.000255 | 0.00827  |
| 212166_at   | XPO7     | -0.00811 | 0.00011  | 0.004802 |
| 221092_at   | IKZF3    | 0.014546 | 0.002007 | 0.033314 |
| 203131_at   | PDGFRA   | 0.023661 | 0.000543 | 0.013556 |
| 213800_at   | CFH      | 0.01954  | 0.00065  | 0.015203 |
| 210367_s_at | PTGES    | 0.011762 | 0.000139 | 0.005485 |
| 212946_at   | KIAA0564 | -0.01448 | 0.000577 | 0.014097 |
| 218789_s_at | C11orf71 | -0.0148  | 4.15E-06 | 0.000571 |
| 44065_at    | C12orf52 | -0.01299 | 0.000991 | 0.020615 |
| 217761_at   | ADI1     | -0.01542 | 0.000186 | 0.006764 |
| 207081_s_at | PI4KA    | -0.01193 | 0.003557 | 0.049211 |
| 214285_at   | FABP3    | -0.01338 | 0.003345 | 0.047153 |
| 206214_at   | PLA2G7   | 0.016526 | 0.001005 | 0.020783 |
| 219498_s_at | BCL11A   | 0.014448 | 0.000217 | 0.007494 |
| 202286_s_at | TACSTD2  | 0.017209 | 0.002847 | 0.042233 |

|             |           |           |          |          |
|-------------|-----------|-----------|----------|----------|
| 216495_x_at |           | 0.010611  | 0.002065 | 0.033981 |
| 210879_s_at | RAB11FIP5 | -0.01167  | 0.000759 | 0.017037 |
| 213282_at   | APOOL     | -0.01089  | 0.00013  | 0.005208 |
| 204130_at   | HSD11B2   | -0.01407  | 0.003515 | 0.048774 |
| 214259_s_at | AKR7A2    | -0.01158  | 0.000859 | 0.018558 |
| 208752_x_at | NAP1L1    | 0.008243  | 0.000409 | 0.01122  |
| 200690_at   | HSPA9     | -0.01152  | 3.64E-03 | 0.049705 |
| 200979_at   | PDHA1     | -0.01661  | 8.58E-05 | 0.004022 |
| 205761_s_at | DUS4L     | -0.01341  | 0.002716 | 0.040822 |
| 220329_s_at | RMND1     | -1.01E-02 | 0.00325  | 0.046318 |
| 218035_s_at | RBM47     | -0.00992  | 0.001603 | 0.028484 |
| 209369_at   | ANXA3     | 0.021907  | 2E-05    | 0.001585 |
| 204912_at   | IL10RA    | 0.013639  | 0.002011 | 0.033353 |
| 209146_at   | SC4MOL    | -0.00699  | 0.002735 | 0.040928 |
| 202661_at   | ITPR2     | -0.01287  | 0.002261 | 0.036179 |
| 219864_s_at | RCAN3     | 0.020505  | 0.000778 | 0.017267 |
| 206313_at   | HLA-DOA   | 0.01054   | 0.00237  | 0.037231 |
| 219471_at   | C13orf18  | 0.013617  | 0.001164 | 0.022935 |
| 205303_at   | KCNJ8     | 0.017519  | 0.001505 | 0.027366 |
| 209435_s_at | ARHGEF2   | 0.012201  | 0.000325 | 0.009727 |
| 202941_at   | NDUFV2    | -0.01072  | 0.000387 | 0.010845 |
| 210298_x_at | FHL1      | 0.019091  | 0.001069 | 0.021705 |
| 214342_at   | ATXN7L1   | -0.01395  | 0.000434 | 0.011574 |
| 205776_at   | FMO5      | -0.02311  | 3.85E-05 | 0.002361 |
| 201410_at   | PLEKHB2   | -0.01179  | 0.000111 | 0.004814 |
| 201272_at   | AKR1B1    | 0.009416  | 0.002653 | 0.040063 |
| 201718_s_at | EPB41L2   | 0.014452  | 0.000315 | 0.009538 |
| 208847_s_at | ADH5      | -0.00796  | 0.000826 | 0.018053 |
| 205686_s_at | CD86      | 0.01367   | 0.000881 | 0.018891 |
| 208868_s_at | GABARAPL1 | -0.0091   | 0.000675 | 0.015596 |
| 201893_x_at | DCN       | 0.018803  | 0.00052  | 0.013129 |
| 214219_x_at | MAP4K1    | 0.010536  | 0.003179 | 0.045715 |
| 202077_at   | NDUFAB1   | -0.01225  | 1.71E-05 | 0.001444 |
| 202353_s_at | PSMD12    | -0.01294  | 8.39E-05 | 0.003949 |
| 220567_at   | IKZF2     | 0.010736  | 0.002356 | 0.03709  |
| 211150_s_at | DLAT      | -0.01199  | 0.000114 | 0.004893 |
| 209036_s_at | MDH2      | -0.00851  | 0.001962 | 0.032686 |
| 208667_s_at | ST13      | -0.00912  | 0.002311 | 0.036723 |
| 211907_s_at | PAR6B     | -0.0106   | 0.00083  | 0.018103 |
| 208864_s_at | TXN       | -0.00968  | 0.000251 | 0.008161 |
| 212038_s_at | VDAC1     | -0.00981  | 0.000115 | 0.004917 |
| 205352_at   | SERPINI1  | -0.01596  | 0.001572 | 0.02802  |
| 200773_x_at | PTMA      | 0.00754   | 0.000239 | 0.007936 |
| 219974_x_at | ECHDC1    | -0.00752  | 0.000563 | 0.01391  |
| 209765_at   | ADAM19    | 0.009912  | 0.000632 | 0.014999 |
| 215794_x_at | GLUD2     | -0.01264  | 0.002562 | 0.039243 |
| 213149_at   | DLAT      | -0.0144   | 3.34E-05 | 0.002199 |
| 202191_s_at | GAS7      | 0.012834  | 0.001698 | 0.029746 |
| 218957_s_at | PAAF1     | -0.01434  | 0.000217 | 0.007494 |

|             |           |           |          |          |
|-------------|-----------|-----------|----------|----------|
| 201785_at   | RNASE1    | 0.025174  | 3.68E-05 | 0.002297 |
| 203753_at   | TCF4      | 0.019017  | 0.000282 | 0.008859 |
| 201744_s_at | LUM       | 0.02416   | 0.002014 | 0.033353 |
| 204438_at   | MRC1      | 0.017809  | 0.001847 | 0.031398 |
| 201919_at   | SLC25A36  | -0.01282  | 1.47E-05 | 0.001332 |
| 201512_s_at | TOMM70A   | -0.00923  | 6.8E-05  | 0.003434 |
| 209762_x_at | SP110     | 0.013492  | 0.000858 | 0.018558 |
| 201743_at   | CD14      | 0.012552  | 0.001971 | 0.032797 |
| 219200_at   | FASTKD3   | -0.01159  | 0.003232 | 0.046213 |
| 220132_s_at | CLEC2D    | 0.013963  | 0.003075 | 0.044656 |
| 202659_at   | PSMB10    | 0.012355  | 7.65E-05 | 0.003724 |
| 219033_at   | PARP8     | 0.01607   | 0.000825 | 0.018053 |
| 202158_s_at | CELF2     | 0.016396  | 0.000509 | 0.012963 |
| 213839_at   | CLMN      | -0.01167  | 0.000331 | 0.009831 |
| 201656_at   | ITGA6     | -0.0079   | 0.003461 | 0.048254 |
| 203917_at   | CXADR     | 0.011845  | 0.002631 | 0.039813 |
| 210807_s_at | SLC16A7   | -0.01588  | 0.001865 | 0.031576 |
| 202686_s_at | AXL       | 0.019432  | 1.09E-05 | 0.001092 |
| 203760_s_at | SLA       | 0.009317  | 0.0037   | 0.049934 |
| 204964_s_at | SSPN      | 0.009961  | 0.000767 | 0.01711  |
| 208636_at   | ACTN1     | 0.012589  | 0.002455 | 0.038011 |
| 218523_at   | LHPP      | -0.0124   | 0.003486 | 0.048509 |
| 211182_x_at | RUNX1     | 0.016406  | 0.001147 | 0.022669 |
| 221942_s_at | GUCY1A3   | 0.012462  | 0.000576 | 0.014097 |
| 209933_s_at | CD300A    | 0.012992  | 0.000796 | 0.017563 |
| 220089_at   | L2HGDH    | -0.01338  | 0.000246 | 0.008033 |
| 220731_s_at | NECAP2    | 0.00758   | 0.000303 | 0.009258 |
| 205278_at   | GAD1      | -0.01406  | 0.002598 | 0.039528 |
| 203732_at   | TRIP4     | -0.00867  | 0.001036 | 0.021355 |
| 202644_s_at | TNFAIP3   | 0.014673  | 0.000118 | 0.004965 |
| 217794_at   | PRR13     | -0.00614  | 0.000725 | 0.016513 |
| 219718_at   | FGGY      | -0.01014  | 0.001102 | 0.022119 |
| 212216_at   | PREPL     | -0.00965  | 0.001355 | 0.025438 |
| 218380_at   | LOC728392 | 0.012587  | 0.001129 | 0.022453 |
| 219229_at   | SLCO3A1   | 0.01947   | 6.69E-05 | 0.003401 |
| 200808_s_at | ZYX       | 0.01427   | 6.65E-05 | 0.003391 |
| 212012_at   | PXDN      | 0.019776  | 5.49E-05 | 0.002935 |
| 219367_s_at |           | 0.012396  | 0.001334 | 0.025204 |
| 218773_s_at | MSRB2     | -0.01351  | 0.000452 | 0.011923 |
| 219195_at   | PPARGC1A  | -0.00898  | 0.002024 | 0.033437 |
| 218021_at   | DHRS4     | -1.93E-02 | 0.002252 | 0.036091 |
| 204083_s_at | TPM2      | 0.017009  | 9.17E-05 | 0.004161 |
| 39729_at    | PRDX2     | -0.00972  | 3.37E-05 | 0.002212 |
| 210139_s_at | PMP22     | 0.015619  | 0.000202 | 0.007111 |
| 218693_at   | TSPAN15   | 0.010668  | 7.21E-05 | 0.003577 |
| 209608_s_at | ACAT2     | -0.01015  | 0.003488 | 0.048509 |
| 221015_s_at | CDADC1    | -0.01658  | 3.65E-05 | 0.002297 |
| 221692_s_at | MRPL34    | -0.01269  | 1.91E-05 | 0.001534 |
| 202510_s_at | TNFAIP2   | 0.016024  | 0.0012   | 0.023462 |

|             |          |          |          |          |
|-------------|----------|----------|----------|----------|
| 209004_s_at | FBXL5    | -0.00939 | 0.003062 | 0.044522 |
| 202291_s_at | MGP      | 0.021181 | 0.000734 | 0.016602 |
| 203030_s_at | PTPRN2   | 0.014507 | 0.002563 | 0.039243 |
| 217980_s_at | MRPL16   | -0.00964 | 0.000238 | 0.007935 |
| 201089_at   | ATP6V1B2 | -0.01254 | 1.14E-03 | 0.022601 |
| 221127_s_at | DKK3     | 0.020626 | 5.29E-05 | 0.002883 |
| 212174_at   | AK2      | -0.01196 | 0.001358 | 0.025442 |
| 204868_at   | ICT1     | -0.00823 | 0.000278 | 0.00879  |
| 201852_x_at | COL3A1   | 0.019882 | 0.00328  | 0.046534 |
| 206117_at   | TPM1     | 0.012976 | 0.000981 | 0.020495 |
| 212522_at   | PDE8A    | -0.01134 | 0.000158 | 0.006061 |
| 211737_x_at | PTN      | 0.023125 | 0.000128 | 0.005138 |
| 219147_s_at | C9orf95  | -0.01344 | 0.000999 | 0.020702 |
| 201556_s_at | VAMP2    | -0.00748 | 0.001509 | 0.02737  |
| 212481_s_at | TPM4     | 0.010433 | 0.000782 | 0.01732  |
| 208561_at   | ABCC9    | 0.018704 | 0.002907 | 0.042881 |
| 203067_at   | PDHX     | -0.0132  | 2E-05    | 0.001585 |
| 214031_s_at | KRT7     | 0.018022 | 0.002242 | 0.035954 |
| 204439_at   | IFI44L   | 0.015484 | 0.00203  | 0.033497 |
| 204615_x_at | IDI1     | -0.00664 | 0.001132 | 0.022453 |
| 217140_s_at | VDAC1    | -0.00907 | 0.00021  | 0.007336 |
| 212242_at   | TUBA4A   | -0.008   | 0.000952 | 0.020091 |
| 215792_s_at | DNAJC11  | -0.00913 | 0.000359 | 0.010283 |
| 204352_at   | TRAF5    | 0.011539 | 0.002346 | 0.036994 |
| 204979_s_at | SH3BGR   | -0.01264 | 0.000759 | 0.017037 |
| 201539_s_at | FHL1     | 0.018556 | 0.001914 | 0.032107 |
| 212731_at   | ANKRD46  | -0.01272 | 0.000674 | 0.015596 |
| 209198_s_at | SYT11    | 0.016706 | 0.000902 | 0.019223 |
| 206662_at   | GLRX     | -0.01149 | 0.000292 | 0.009066 |
| 206974_at   | CXCR6    | 0.011955 | 0.001515 | 0.02744  |
| 211989_at   | SMARCE1  | 0.006557 | 0.001279 | 0.024521 |
| 203551_s_at | COX11    | -0.01026 | 0.000399 | 0.011061 |
| 202299_s_at | HBXIP    | -0.00915 | 0.0028   | 0.041691 |
| 202665_s_at | WIPF1    | 0.009079 | 0.001352 | 0.025438 |
| 219217_at   | NARS2    | -0.01365 | 0.00017  | 0.00639  |
| 211170_s_at | PDE10A   | -0.01403 | 4.25E-05 | 0.002505 |
| 205133_s_at | HSPE1    | -0.00798 | 0.000959 | 0.020134 |
| 208914_at   | GGA2     | -0.01157 | 0.002346 | 0.036994 |
| 212791_at   | C1orf216 | 0.010147 | 0.000502 | 0.012819 |
| 212827_at   | IGHM     | 0.018677 | 0.001798 | 0.030894 |
| 221523_s_at | RRAGD    | -0.01676 | 0.000192 | 0.006947 |
| 209167_at   | GPM6B    | 0.021526 | 0.000446 | 0.011808 |
| 218398_at   | MRPS30   | -0.00849 | 0.000347 | 0.010106 |
| 206767_at   | RBMS3    | 0.014995 | 0.000518 | 0.013099 |
| 204806_x_at | HLA-F    | 0.012043 | 0.003279 | 0.046534 |
| 204608_at   | ASL      | -0.01516 | 0.00217  | 0.035179 |
| 201701_s_at | PGRMC2   | -0.01084 | 0.000914 | 0.019391 |
| 201792_at   | AEBP1    | 0.018057 | 0.000223 | 0.007629 |
| 202959_at   | MUT      | -0.01145 | 0.00054  | 0.013522 |



|             |           |           |          |          |
|-------------|-----------|-----------|----------|----------|
| 209095_at   | DLD       | -0.01058  | 0.000803 | 0.017669 |
| 206910_x_at | CFHR2     | 0.009048  | 0.001783 | 0.030764 |
| 204115_at   | GNG11     | 0.009707  | 0.003386 | 0.047558 |
| 206197_at   | NME5      | -0.00942  | 0.000675 | 0.015596 |
| 220988_s_at | C1QTNF3   | 0.014147  | 0.002387 | 0.037454 |
| 203697_at   | FRZB      | 0.016711  | 0.000914 | 0.019391 |
| 203646_at   | FDX1      | -0.0109   | 8.16E-05 | 0.003874 |
| 219550_at   | ROBO3     | 0.010841  | 0.001771 | 0.03063  |
| 208869_s_at | GABARAPL1 | -0.00732  | 0.000688 | 0.015834 |
| 203372_s_at | SOCS2     | -0.01373  | 0.000807 | 0.017757 |
| 205543_at   | HSPA4L    | -0.01014  | 0.00053  | 0.013344 |
| 202780_at   | OXCT1     | -0.01813  | 0.000212 | 0.007367 |
| 205336_at   | PVALB     | -0.02046  | 0.001042 | 0.021392 |
| 202206_at   | ARL4C     | 0.026037  | 4E-05    | 0.002406 |
| 221953_s_at | MMP24     | -0.00914  | 0.002455 | 0.038011 |
| 222269_at   | APOOL     | -0.01056  | 0.003617 | 0.049573 |
| 209492_x_at | ATP5I     | -0.00394  | 0.003164 | 0.045646 |
| 208910_s_at | C1QBP     | -0.01037  | 0.000249 | 0.00812  |
| 213759_at   | ARL4C     | 0.016145  | 0.000548 | 0.013611 |
| 201859_at   | SRGN      | 0.016193  | 0.002883 | 0.042594 |
| 201310_s_at | C5orf13   | -0.0113   | 0.002688 | 0.040514 |
| 203068_at   | KLHL21    | -0.00928  | 0.001939 | 0.032483 |
| 202738_s_at | PHKB      | -0.00865  | 0.000121 | 0.00502  |
| 218805_at   | GIMAP5    | 0.014836  | 0.001764 | 0.030555 |
| 217360_x_at | IGHA1     | 0.01211   | 0.000818 | 0.017926 |
| 203465_at   | MRPL19    | -0.0084   | 0.002417 | 0.037787 |
| 200030_s_at | SLC25A3   | -0.00719  | 2.19E-03 | 3.54E-02 |
| 202936_s_at | SOX9      | 0.021836  | 0.00011  | 0.004802 |
| 218640_s_at | PLEKHF2   | -0.01026  | 0.002446 | 0.037976 |
| 201186_at   | LRPAP1    | -0.00726  | 0.003093 | 0.044843 |
| 216394_x_at |           | 0.010188  | 0.00161  | 0.028571 |
| 202533_s_at | DHFR      | -0.01154  | 0.002595 | 0.039509 |
| 64064_at    | GIMAP5    | 0.013954  | 0.001537 | 0.027725 |
| 203190_at   | NDUFS8    | -0.00791  | 0.002942 | 0.04326  |
| 220741_s_at | PPA2      | -0.00878  | 0.001597 | 0.028431 |
| 216036_x_at | WDTC1     | -6.80E-03 | 0.000939 | 0.019838 |
| 221437_s_at | MRPS15    | -0.01212  | 0.000158 | 0.006061 |
| 212582_at   | OSBPL8    | -0.00959  | 0.00156  | 0.027898 |
| 208666_s_at | ST13      | -0.0096   | 8.96E-05 | 0.0041   |
| 209791_at   | PADI2     | -0.01775  | 4.34E-05 | 0.002545 |
| 218116_at   | C9orf78   | -0.00668  | 0.001155 | 0.022781 |
| 220333_at   | PAQR5     | -0.01582  | 0.000668 | 0.015566 |
| 208091_s_at | VOPP1     | 0.011157  | 0.001619 | 0.028686 |
| 210544_s_at | ALDH3A2   | -0.01692  | 0.000697 | 0.015981 |
| 219032_x_at | OPN3      | -0.00992  | 0.000192 | 0.006947 |
| 201570_at   | SAMM50    | -0.01256  | 0.000366 | 0.010442 |
| 201368_at   | ZFP36L2   | 0.007092  | 0.003316 | 0.04692  |
| 220149_at   | C2orf54   | -0.021    | 0.001953 | 0.032618 |
| 208969_at   | NDUFA9    | -0.00953  | 0.000387 | 0.010845 |

|             |         |          |          |          |
|-------------|---------|----------|----------|----------|
| 218162_at   | OLFML3  | 1.13E-02 | 0.002971 | 0.043515 |
| 202156_s_at | CELF2   | 0.010495 | 0.000499 | 0.012769 |
| 209111_at   | RNF5    | -0.00977 | 0.000871 | 0.018742 |
| 203199_s_at | MTRR    | -0.01314 | 0.000157 | 0.006052 |
| 211715_s_at | BDH1    | -0.01498 | 0.001711 | 0.029921 |
| 204000_at   | GNB5    | -0.01242 | 3.08E-05 | 0.002077 |
| 220617_s_at | ZNF532  | 0.011269 | 0.001523 | 0.027509 |
| 211813_x_at | DCN     | 0.019247 | 0.000594 | 0.01436  |
| 203115_at   | FECH    | -0.01406 | 0.000295 | 0.009129 |
| 220092_s_at | ANTXR1  | 0.020593 | 0.000643 | 0.015166 |
| 202279_at   | C14orf2 | -0.01042 | 9.28E-05 | 0.004201 |
| 207124_s_at | GNB5    | -0.01346 | 6.39E-06 | 0.000769 |
| 212713_at   | MFAP4   | 0.020183 | 0.000252 | 0.008177 |
| 201641_at   | BST2    | 0.01381  | 0.001748 | 0.030321 |
| 211820_x_at | GYPA    | -0.01546 | 0.001051 | 0.021471 |
| 202443_x_at | NOTCH2  | 0.01083  | 0.000157 | 0.006058 |
| 56748_at    | TRIM10  | -0.0108  | 0.001904 | 0.031966 |
| 204589_at   | NUAK1   | 0.013054 | 0.002416 | 0.037787 |
| 201494_at   | PRCP    | -0.00693 | 0.000792 | 0.017513 |
| 214247_s_at | DKK3    | 0.020416 | 0.000136 | 0.005416 |
| 217906_at   | KLHDC2  | -0.00885 | 0.00369  | 0.049934 |
| 202675_at   | SDHB    | -0.01317 | 0.000764 | 0.017107 |
| 206118_at   | STAT4   | 0.014848 | 0.0015   | 0.027317 |
| 202922_at   | GCLC    | -0.01387 | 0.000451 | 0.011913 |
| 33323_r_at  | SFN     | 0.032756 | 0.001281 | 0.024541 |
| 202271_at   | FBXO28  | -0.01153 | 0.001303 | 0.024823 |
| 209040_s_at | PSMB8   | 0.012454 | 0.00156  | 0.027898 |
| 208782_at   | FSTL1   | 0.012934 | 0.003163 | 0.045646 |
| 219872_at   | FAM198B | 1.63E-02 | 0.000959 | 0.020134 |
| 201325_s_at | EMP1    | 0.009826 | 0.00298  | 0.043593 |
| 216834_at   | RGS1    | 0.017004 | 0.002187 | 0.035349 |
| 200907_s_at | PALLD   | 0.011118 | 0.000332 | 0.009836 |
| 204594_s_at | SMCR7L  | -0.01072 | 0.001456 | 0.026801 |
| 214598_at   | CLDN8   | -0.01365 | 0.003603 | 0.049505 |
| 203945_at   | ARG2    | -0.00669 | 0.002449 | 0.037999 |
| 203824_at   | TSPAN8  | 0.019589 | 0.003451 | 0.048162 |
| 206348_s_at | PDK3    | -0.01336 | 0.003424 | 0.048014 |
| 215051_x_at | AIF1    | 0.012477 | 0.003595 | 0.049478 |
| 205164_at   | GCAT    | -0.01277 | 0.000899 | 0.019172 |
| 203859_s_at | PALM    | -0.00915 | 0.002012 | 0.033353 |
| 201954_at   | ARPC1B  | 0.009929 | 0.002593 | 0.039509 |
| 206756_at   | CHST7   | 0.009532 | 0.002847 | 0.042233 |
| 205696_s_at | GFRA1   | 0.01864  | 6.22E-05 | 0.003229 |
| 214155_s_at | LARP4   | -0.01283 | 0.000276 | 0.008766 |
| 202720_at   | TES     | 0.015529 | 0.000197 | 0.007022 |
| 212814_at   | AHCYL2  | -0.0131  | 0.002108 | 0.034463 |
| 202942_at   | ETFB    | -0.01188 | 0.002518 | 0.038734 |
| 211896_s_at | DCN     | 0.019108 | 0.001426 | 0.026364 |
| 203032_s_at | FH      | -0.01414 | 0.002318 | 0.036806 |

|             |           |          |          |          |
|-------------|-----------|----------|----------|----------|
| 202313_at   | PPP2R2A   | -0.00662 | 0.001098 | 0.022057 |
| 207480_s_at | MEIS2     | 0.012808 | 0.001183 | 0.023232 |
| 209386_at   | TM4SF1    | 0.018227 | 8.3E-05  | 0.003933 |
| 202693_s_at | STK17A    | 0.014142 | 0.000409 | 0.01122  |
| 213408_s_at | PI4KA     | -0.00762 | 0.003598 | 0.049478 |
| 216442_x_at | FN1       | 0.013731 | 0.003552 | 0.049185 |
| 200715_x_at | RPL13A    | 0.006152 | 3.18E-03 | 0.045715 |
| 203886_s_at | FBLN2     | 0.01089  | 0.001631 | 0.02888  |
| 202994_s_at | FBLN1     | 0.018521 | 0.000753 | 0.01692  |
| 213289_at   | APOOL     | -0.01656 | 0.001736 | 0.030161 |
| 215045_at   | CELF3     | -0.00822 | 0.003241 | 0.046272 |
| 205528_s_at | RUNX1T1   | 0.015902 | 0.001068 | 0.021705 |
| 209546_s_at | APOL1     | 0.013295 | 0.001867 | 0.031583 |
| 214505_s_at | FHL1      | 0.021689 | 0.000979 | 0.020487 |
| 211662_s_at | VDAC2     | -0.00714 | 0.000565 | 0.013947 |
| 202935_s_at | SOX9      | 0.024069 | 3.62E-05 | 0.002297 |
| 201651_s_at | PACSIN2   | -0.00699 | 0.00172  | 0.030024 |
| 201243_s_at | ATP1B1    | -0.00707 | 0.000801 | 0.017654 |
| 49679_s_at  | MMP24     | -0.01043 | 0.001089 | 0.021973 |
| 202719_s_at | TES       | 0.013029 | 0.001756 | 0.03044  |
| 201709_s_at | NIPSNAP1  | -0.00888 | 0.001381 | 0.025804 |
| 217942_at   | MRPS35    | -0.01039 | 0.000598 | 0.014409 |
| 204786_s_at | IFNAR2    | 0.020326 | 0.000199 | 0.007062 |
| 202739_s_at | PHKB      | -0.01006 | 0.001647 | 0.029114 |
| 218447_at   | C16orf61  | -0.00664 | 0.002356 | 0.03709  |
| 33322_i_at  | SFN       | 0.028518 | 0.001333 | 0.025204 |
| 212228_s_at | COQ9      | -0.01498 | 7.76E-05 | 0.003748 |
| 204300_at   | PET112L   | -0.01304 | 0.000776 | 0.017226 |
| 219496_at   | ANKRD57   | -0.01382 | 0.002783 | 0.041532 |
| 217754_at   | DDX56     | -0.00742 | 0.003521 | 0.048814 |
| 209273_s_at | ISCA1     | -0.01121 | 5.1E-06  | 0.000653 |
| 218549_s_at | FAM82B    | -0.00861 | 0.001943 | 0.032515 |
| 213366_x_at | ATP5C1    | -0.00857 | 0.000281 | 0.008854 |
| 214755_at   | UAP1L1    | -0.01486 | 0.000126 | 0.005111 |
| 216526_x_at | HLA-C     | 0.009243 | 0.001132 | 0.022453 |
| 207419_s_at | RAC2      | 0.008664 | 0.001479 | 0.027033 |
| 208789_at   | PTRF      | 0.013323 | 0.001519 | 0.027491 |
| 217964_at   | TTC19     | -0.00751 | 0.002545 | 0.039021 |
| 204932_at   | TNFRSF11B | 0.014598 | 4.65E-05 | 0.002686 |
| 39402_at    | IL1B      | 1.39E-02 | 0.001186 | 0.023264 |
| 209384_at   | PROSC     | -0.01081 | 0.001127 | 0.022453 |
| 214331_at   | TSMF      | -0.01076 | 0.001838 | 0.031347 |
| 209466_x_at | PTN       | 0.020902 | 0.001093 | 0.021983 |
| 218024_at   | BRP44L    | -0.01514 | 4.24E-06 | 0.000572 |
| 36920_at    | MTM1      | -0.01281 | 0.000326 | 0.009737 |
| 206580_s_at | EFEMP2    | 0.011787 | 0.000388 | 0.010845 |
| 221814_at   | GPR124    | 0.015392 | 0.000424 | 0.011441 |
| 210021_s_at | CCNO      | 0.008864 | 0.001244 | 0.023996 |
| 202440_s_at | ST5       | 0.014103 | 0.00054  | 0.013522 |

|              |              |           |          |          |
|--------------|--------------|-----------|----------|----------|
| 203894_at    | TUBG2        | -0.0086   | 0.002095 | 0.034365 |
| 209981_at    | CSDC2        | -0.01469  | 0.000453 | 0.011933 |
| 208807_s_at  | CHD3         | 0.007972  | 0.002438 | 0.037947 |
| 212706_at    | RASA4        | -0.01252  | 0.002471 | 0.038103 |
| 214869_x_at  | GAPVD1       | -0.01009  | 0.000749 | 0.016853 |
| 200788_s_at  | PEA15        | 0.009754  | 0.002285 | 0.036412 |
| 218605_at    | TFB2M        | -0.01121  | 0.003585 | 0.049424 |
| 204470_at    | CXCL1        | 0.020928  | 0.001057 | 0.021572 |
| 218494_s_at  | SLC2A4RG     | -0.01511  | 0.001418 | 0.026283 |
| 202637_s_at  | ICAM1        | 0.016667  | 0.000297 | 0.009149 |
| 210764_s_at  | CYR61        | 0.021338  | 0.001602 | 0.028484 |
| 201917_s_at  | SLC25A36     | -0.00836  | 0.000546 | 0.013577 |
| 214827_at    | PARD6B       | -0.01161  | 4.71E-05 | 0.002692 |
| 213033_s_at  | NFIB         | -0.00798  | 0.00321  | 0.046034 |
| 214767_s_at  | HSPB6        | 0.023929  | 0.001542 | 0.027748 |
| 204934_s_at  | HPN          | -0.0156   | 0.002181 | 0.035328 |
| 217362_x_at  | HLA-DRB6     | 0.011759  | 0.002788 | 0.041566 |
| 203780_at    | MPZL2        | 0.012652  | 0.002294 | 0.036533 |
| 204268_at    | S100A2       | 0.019349  | 9.14E-05 | 0.004161 |
| 207057_at    | SLC16A7      | -0.01513  | 0.001354 | 0.025438 |
| 219809_at    | WDR55        | -0.00972  | 0.001229 | 0.023802 |
| 214277_at    | COX11        | -0.01735  | 0.000663 | 0.015487 |
| 205910_s_at  | CEL          | -0.01875  | 0.002737 | 0.040928 |
| 221911_at    | ETV1         | 0.019118  | 0.000287 | 0.008964 |
| 213262_at    | SACS         | 0.01442   | 0.001785 | 0.030772 |
| 207894_s_at  | TCL6         | -0.0136   | 0.002153 | 0.035    |
| 213005_s_at  | KANK1        | -0.01058  | 0.002342 | 0.036983 |
| 218471_s_at  | BBS1         | -0.0096   | 0.000921 | 0.019512 |
| 209512_at    | HSDL2        | -0.01482  | 0.001106 | 0.02217  |
| 218170_at    | ISOC1        | -0.01167  | 0.000236 | 0.007898 |
| 203557_s_at  | PCBD1        | -0.01089  | 0.001819 | 0.031148 |
| 219133_at    | OXSM         | -0.0166   | 0.000114 | 0.00489  |
| 209001_s_at  | ANAPC13      | -0.0074   | 0.003319 | 0.04692  |
| 200986_at    | SERPING1     | 0.022143  | 0.00052  | 0.013122 |
| 202497_x_at  | SLC2A3       | 0.016066  | 0.000512 | 0.012992 |
| 214104_at    | GPR161       | 0.007712  | 0.001854 | 0.03146  |
| 218541_s_at  | C8orf4       | 0.013381  | 0.003181 | 0.045719 |
| 220942_x_at  | FAM162A      | -0.00664  | 0.002074 | 0.034068 |
| 221493_at    | TSPYL1       | -8.59E-03 | 0.001244 | 0.023996 |
| 201761_at    | MTHFD2       | 0.016185  | 0.003213 | 0.046034 |
| 211719_x_at  | FN1          | 0.013401  | 0.002803 | 0.041717 |
| 203200_s_at  | MTRR         | -0.01531  | 0.00056  | 0.013845 |
| AFFX-HUMGAPI | GAPDH        | -0.00857  | 0.001306 | 0.024828 |
| 208870_x_at  | ATP5C1       | -0.0099   | 0.000102 | 0.004556 |
| 206496_at    | FMO3         | 0.014743  | 0.001418 | 0.026283 |
| 37408_at     | MRC2         | 0.014856  | 0.000383 | 0.010746 |
| 202950_at    | CRYZ         | -0.00812  | 0.00259  | 0.039509 |
| 210131_x_at  | SDHC         | -0.01032  | 0.00154  | 0.027735 |
| 221847_at    | LOC100129361 | -0.008    | 0.001199 | 0.023462 |

|             |         |           |          |          |
|-------------|---------|-----------|----------|----------|
| 207610_s_at | EMR2    | 0.011905  | 0.002979 | 0.043593 |
| 204105_s_at | NRCAM   | -0.0161   | 0.000739 | 0.016655 |
| 212489_at   | COL5A1  | 0.013007  | 0.002644 | 0.039986 |
| 200614_at   | CLTC    | -0.00751  | 1.29E-03 | 0.024642 |
| 212543_at   | AIM1    | -0.00976  | 0.003349 | 0.047153 |
| 218377_s_at | RWDD2B  | -0.00791  | 0.000275 | 0.008754 |
| 214175_x_at | PDLIM4  | 0.012155  | 0.003048 | 0.044344 |
| 213709_at   | BHLHB9  | -0.00958  | 0.001822 | 0.031152 |
| 201621_at   | NBL1    | 0.012459  | 0.001818 | 0.031145 |
| 219213_at   | JAM2    | 0.018079  | 0.000105 | 0.004613 |
| 214129_at   | PDE4DIP | -0.00825  | 0.001292 | 0.02468  |
| 209387_s_at | TM4SF1  | 0.01181   | 0.001709 | 0.029909 |
| 221550_at   | COX15   | -0.00853  | 0.003486 | 0.048509 |
| 212609_s_at | AKT3    | 0.010028  | 0.000156 | 0.006014 |
| 219313_at   | GRAMD1C | -0.01015  | 0.001781 | 0.030753 |
| 213457_at   | MFHAS1  | 0.013996  | 0.000633 | 0.015009 |
| 220407_s_at | TGFB2   | 0.017256  | 8.37E-05 | 0.003949 |
| 200771_at   | LAMC1   | 0.010816  | 1.39E-03 | 0.025825 |
| 209692_at   | EYA2    | -0.00994  | 0.001286 | 0.024605 |
| 202411_at   | IFI27   | 0.016421  | 0.000575 | 0.014097 |
| 202208_s_at | ARL4C   | 0.010947  | 0.000431 | 0.011543 |
| 209325_s_at | RGS16   | 0.016682  | 2.81E-05 | 0.001943 |
| 203954_x_at | CLDN3   | 0.012023  | 0.002212 | 0.035561 |
| 208790_s_at | PTRF    | 0.015507  | 9.34E-05 | 0.004213 |
| 222088_s_at | SLC2A14 | 0.021858  | 0.000568 | 0.013998 |
| 218098_at   | ARFGEF2 | -0.00787  | 0.001133 | 0.022453 |
| 203414_at   | MMD     | 0.011172  | 0.000719 | 0.016404 |
| 209473_at   | ENTPD1  | 0.009839  | 0.000257 | 0.008322 |
| 221624_at   | TCL6    | -0.01071  | 0.000575 | 0.014097 |
| 37022_at    | PRELP   | 0.005864  | 0.003021 | 0.044069 |
| 209065_at   | UQCRB   | -0.01232  | 0.000299 | 0.009202 |
| 221087_s_at | APOL3   | 0.016589  | 0.001091 | 0.021973 |
| 202209_at   | LSM3    | -0.00723  | 0.001958 | 0.032642 |
| 214045_at   | LIAS    | -1.24E-02 | 0.001075 | 0.021776 |
| 207545_s_at | NUMB    | -0.00947  | 0.002272 | 0.036287 |
| 205711_x_at | ATP5C1  | -0.00884  | 0.000214 | 0.007417 |
| 213488_at   | SNED1   | 0.012426  | 0.001114 | 0.022271 |
| 221369_at   | MTNR1A  | -0.00952  | 0.002285 | 0.036412 |
| 218722_s_at | CCDC51  | -0.00805  | 0.002101 | 0.034422 |
| 219519_s_at | SIGLEC1 | 0.010899  | 0.002119 | 0.034559 |
| 213921_at   | SST     | 0.016349  | 0.000302 | 0.009251 |
| 202325_s_at | ATP5J   | -0.00741  | 0.000104 | 0.004602 |
| 220372_at   | DNAJC28 | -0.01346  | 0.000224 | 0.007629 |
| 221223_x_at | CISH    | -0.01141  | 0.003485 | 0.048509 |
| 204103_at   | CCL4    | 0.011607  | 0.000645 | 0.015168 |
| 203566_s_at | AGL     | -0.01037  | 0.001791 | 0.030863 |
| 211727_s_at | COX11   | -0.01103  | 0.000477 | 0.012419 |
| 212312_at   | BCL2L1  | -0.00938  | 0.001001 | 0.020714 |
| 221268_s_at | SGPP1   | -0.01262  | 0.000406 | 0.011183 |

|             |          |          |          |          |
|-------------|----------|----------|----------|----------|
| 222146_s_at | TCF4     | 0.018971 | 0.000244 | 0.008008 |
| 213760_s_at | ZNF330   | -0.00857 | 0.002815 | 0.041864 |
| 205322_s_at | MTF1     | 0.008232 | 0.001471 | 0.026962 |
| 219036_at   | CEP70    | -0.01067 | 0.00117  | 0.023016 |
| 211518_s_at | BMP4     | 0.007889 | 0.003242 | 0.046272 |
| 201918_at   | SLC25A36 | -0.01    | 2.91E-03 | 0.042881 |
| 212183_at   | NUDT4    | -0.01594 | 0.001928 | 0.032311 |
| 217748_at   | ADIPOR1  | -0.00769 | 0.001726 | 0.030041 |
| 211488_s_at | ITGB8    | 0.02085  | 4.45E-05 | 0.002582 |
| 208981_at   | PECAM1   | 0.011465 | 0.002335 | 0.036972 |
| 207016_s_at | ALDH1A2  | 0.017091 | 0.0018   | 0.030894 |
| 212285_s_at | AGRN     | 0.013848 | 0.000483 | 0.012504 |
| 207388_s_at | PTGES    | 0.007861 | 0.000727 | 0.016529 |
| 214036_at   | EFNA5    | 0.01406  | 0.001384 | 0.025822 |
| 203371_s_at | NDUFB3   | -0.00722 | 0.000485 | 0.012535 |
| 212420_at   | ELF1     | 0.009777 | 0.002154 | 0.035    |
| 203897_at   | LYRM1    | -0.0103  | 0.002913 | 0.042918 |
| 205694_at   | TYRP1    | -0.02047 | 0.000877 | 0.018814 |
| 201652_at   | COPS5    | -0.00987 | 0.000181 | 0.006654 |
| 202929_s_at | DDT      | -0.00878 | 0.002631 | 0.039813 |
| 213036_x_at | ATP2A3   | 0.010122 | 0.002276 | 0.036315 |
| 215034_s_at | TM4SF1   | 1.55E-02 | 0.000351 | 0.010163 |
| 205341_at   | EHD2     | 0.011811 | 0.000558 | 0.013841 |
| 209077_at   | TXN2     | -0.01209 | 0.001298 | 0.024756 |
| 214587_at   | COL8A1   | 0.011996 | 0.001723 | 0.030041 |
| 205777_at   | DUSP9    | -0.01512 | 0.003652 | 0.049798 |
| 40665_at    | FMO3     | 0.016278 | 0.00253  | 0.038864 |
| 210514_x_at | HLA-G    | 0.013193 | 0.00224  | 0.035954 |
| 213115_at   | ATG4A    | -0.01206 | 0.002209 | 0.035548 |
| 209276_s_at | GLRX     | -0.01034 | 0.003177 | 0.045715 |
| 202035_s_at | SFRP1    | 0.012009 | 0.001848 | 0.031398 |
| 222236_s_at | ASAP3    | -0.00902 | 0.000648 | 0.015177 |
| 202499_s_at | SLC2A3   | 0.021425 | 0.000782 | 0.01732  |
| 220934_s_at | TMEM223  | -0.0142  | 1.39E-05 | 0.001288 |
| 209781_s_at | KHDRBS3  | -0.01074 | 0.001353 | 0.025438 |
| 205931_s_at | CREB5    | 0.013101 | 0.000431 | 0.011543 |
| 214749_s_at | ARMCX6   | 0.00958  | 0.001218 | 0.023665 |
| 201289_at   | CYR61    | 0.017666 | 0.002821 | 0.041925 |
| 213616_at   | C18orf10 | 0.011232 | 0.001552 | 0.027844 |
| 201324_at   | EMP1     | 0.017273 | 0.000371 | 0.01055  |
| 212600_s_at | UQCRC2   | -0.00817 | 0.003579 | 0.049424 |
| 207507_s_at | ATP5G3   | -0.01023 | 4.68E-05 | 0.002689 |
| 208944_at   | TGFBR2   | 0.014277 | 0.000116 | 0.004917 |
| 213816_s_at | MET      | 0.018087 | 0.000579 | 0.014117 |
| 210444_at   | NPY6R    | -0.01579 | 0.003173 | 0.045715 |
| 201799_s_at | OSBP     | -0.01067 | 0.000172 | 0.006456 |
| 200948_at   | MLF2     | -0.0078  | 0.000467 | 0.012215 |
| 221142_s_at | PECR     | -0.0132  | 0.000963 | 0.020191 |
| 46665_at    | SEMA4C   | 0.010249 | 0.002971 | 0.043515 |

|             |          |          |          |          |
|-------------|----------|----------|----------|----------|
| 203180_at   | ALDH1A3  | 0.01515  | 0.00014  | 0.005513 |
| 221533_at   | FAM162A  | -0.00949 | 0.000242 | 0.007968 |
| 211871_x_at | GNB5     | -0.01093 | 0.003232 | 0.046213 |
| 205887_x_at | MSH3     | -0.00804 | 0.000956 | 0.020131 |
| 212521_s_at | PDE8A    | -0.01025 | 0.003117 | 0.045115 |
| 212089_at   | LMNA     | 0.013272 | 0.00031  | 0.00944  |
| 204627_s_at | ITGB3    | 0.02451  | 8.99E-05 | 0.004105 |
| 203499_at   | EPHA2    | 0.01074  | 0.001179 | 0.023183 |
| 200818_at   | ATP5O    | -0.00905 | 3.13E-04 | 0.009487 |
| 219839_x_at | TCL6     | -0.0094  | 0.001435 | 0.026477 |
| 213964_x_at |          | -0.01117 | 0.000181 | 0.006654 |
| 205286_at   | TFAP2C   | 0.012972 | 0.002239 | 0.035954 |
| 37005_at    | NBL1     | 0.01649  | 0.000225 | 0.00764  |
| 209909_s_at | TGFB2    | 0.018963 | 0.000508 | 0.012943 |
| 201708_s_at | NIPSNAP1 | -0.01691 | 0.002599 | 0.039528 |
| 214701_s_at | FN1      | 0.017852 | 0.001071 | 0.021723 |
| 208589_at   | TRPC7    | -0.01183 | 0.001896 | 0.031955 |
| 204032_at   | BCAR3    | -0.0157  | 6.85E-05 | 0.003451 |
| 201109_s_at | THBS1    | 0.013254 | 0.001207 | 0.023508 |
| 221620_s_at | APOO     | -0.01217 | 0.000291 | 0.009066 |
| 206746_at   | BFSP1    | 0.012317 | 0.000719 | 0.016404 |
| 200906_s_at | PALLD    | 0.009554 | 0.003595 | 0.049478 |
| 218309_at   | CAMK2N1  | -0.00786 | 4.85E-05 | 0.002745 |
| 208660_at   | CS       | -0.00802 | 0.000197 | 0.007022 |
| 215774_s_at | SUCLG2   | -0.01499 | 0.002387 | 0.037454 |
| 203065_s_at | CAV1     | 0.017295 | 0.0002   | 0.007095 |
| 203134_at   | PICALM   | -0.00779 | 0.000358 | 0.010283 |
| 205392_s_at | CCL14    | 0.01535  | 0.002965 | 0.043478 |
| 202037_s_at | SFRP1    | 0.018967 | 0.000375 | 0.0106   |
| 208905_at   | CYCS     | -0.00768 | 0.003516 | 0.048774 |
| 206099_at   | PRKCH    | 0.015937 | 0.000531 | 0.013344 |
| 203343_at   | UGDH     | -0.01296 | 0.00274  | 0.040933 |
| 201823_s_at | RNF14    | -0.008   | 0.003617 | 0.049573 |
| 203240_at   | FCGBP    | 0.011118 | 0.000262 | 0.008427 |
| 207508_at   | ATP5G3   | -0.00826 | 0.000159 | 0.006074 |
| 203966_s_at | PPM1A    | -0.00938 | 0.001548 | 0.027808 |
| 209723_at   | SERPINB9 | 0.014014 | 0.000517 | 0.013099 |
| 212093_s_at | MTUS1    | -0.00855 | 0.001799 | 0.030894 |
| 218394_at   | ROGDI    | -0.01781 | 9.56E-05 | 0.004278 |
| 202366_at   | ACADS    | -0.00638 | 2.36E-03 | 0.037158 |
| 201630_s_at | ACP1     | -0.00753 | 1.01E-03 | 0.020915 |
| 208901_s_at | TOP1     | -0.00591 | 0.000731 | 0.016546 |
| 202850_at   | ABCD3    | -0.00942 | 0.00211  | 0.034463 |
| 218930_s_at | TMEM106B | -0.00814 | 0.003434 | 0.048049 |
| 221261_x_at | MAGED4   | 0.013157 | 0.000543 | 0.013556 |
| 209640_at   | PML      | 0.005558 | 0.003156 | 0.045627 |
| 202119_s_at | CPNE3    | -0.01003 | 0.001686 | 0.029671 |
| 217985_s_at | BAZ1A    | 0.012739 | 0.001651 | 0.029151 |
| 203769_s_at | STS      | 0.01291  | 0.001206 | 0.023508 |

|             |          |          |          |          |
|-------------|----------|----------|----------|----------|
| 203029_s_at | PTPRN2   | 0.011649 | 0.00371  | 0.049964 |
| 203661_s_at | TMOD1    | 0.013751 | 0.000921 | 0.019512 |
| 201256_at   | COX7A2L  | -0.00369 | 0.00239  | 0.037462 |
| 206034_at   | SERPINB8 | 0.014509 | 0.001248 | 0.024042 |
| 209287_s_at | CDC42EP3 | 0.010485 | 0.001124 | 0.02244  |
| 203458_at   | SPR      | -0.00919 | 0.002364 | 0.037171 |
| 202142_at   | COPS8    | -0.00951 | 0.00013  | 0.005223 |
| 216411_s_at | GALK2    | -0.00697 | 0.003703 | 0.049934 |
| 201227_s_at | NDUFB8   | -0.00732 | 0.002662 | 0.040184 |
| 222288_at   |          | 0.016787 | 0.001356 | 0.025438 |
| 208848_at   | ADH5     | -0.01185 | 0.001093 | 0.021983 |
| 201466_s_at | JUN      | 0.014505 | 0.002792 | 0.041598 |
| 217416_x_at |          | -0.00661 | 0.002195 | 0.035413 |
| 32099_at    | SAFB2    | -0.00815 | 0.003685 | 0.049934 |
| 217868_s_at | METTL9   | -0.0085  | 0.001154 | 0.022781 |
| 211506_s_at | IL8      | 0.019718 | 0.000211 | 0.007354 |
| 201107_s_at | THBS1    | 0.018525 | 0.000596 | 0.014398 |
| 212036_s_at | PNN      | 0.011122 | 0.000359 | 0.010283 |
| 221541_at   | CRISPLD2 | 0.022499 | 0.000185 | 0.006764 |
| 212078_s_at | MLL      | 0.009606 | 0.003321 | 0.04692  |
| 217912_at   | DUS1L    | -0.00936 | 0.000437 | 0.011624 |
| 202343_x_at | COX5B    | -0.00921 | 0.002309 | 0.036716 |
| 202036_s_at | SFRP1    | 0.017945 | 0.000498 | 0.012767 |
| 202112_at   | VWF      | 0.019875 | 0.000833 | 0.018153 |
| 212013_at   | PXDN     | 0.012687 | 0.002143 | 0.034876 |
| 218536_at   | MRS2     | -0.00919 | 0.002081 | 0.034167 |
| 213736_at   | COX5B    | -0.00887 | 0.003167 | 0.045664 |
| 205068_s_at | ARHGAP26 | 0.011635 | 0.000964 | 0.020193 |
| 211600_at   | PTPRO    | -0.00408 | 0.003277 | 0.046534 |
| 214013_s_at | TBC1D1   | -0.00913 | 0.003024 | 0.044081 |
| 207334_s_at | TGFBR2   | 0.015061 | 0.003456 | 0.048209 |
| 202859_x_at | IL8      | 0.02158  | 0.003189 | 0.045801 |
| 203485_at   | RTN1     | 0.013948 | 0.001548 | 0.027808 |
| 202070_s_at | IDH3A    | -0.01067 | 0.000543 | 0.013556 |
| 209286_at   | CDC42EP3 | 0.017569 | 0.000241 | 0.007954 |
| 210638_s_at | FBXO9    | -0.00655 | 0.002945 | 0.043283 |
| 209728_at   | HLA-DRB4 | 0.030354 | 0.003428 | 0.048025 |
| 216954_x_at | ATP5O    | -0.0054  | 0.001038 | 0.021363 |
| 201510_at   | ELF3     | 0.015862 | 0.002405 | 0.037657 |
| 220177_s_at | TMPRSS3  | 0.012206 | 0.00332  | 0.04692  |
| 214263_x_at | POLR2C   | -0.00762 | 0.002724 | 0.040871 |
| 211663_x_at | PTGDS    | 0.014422 | 0.000627 | 0.014934 |
| 218289_s_at | UBA5     | -0.00889 | 0.001724 | 0.030041 |
| 212444_at   |          | 0.021326 | 0.001043 | 0.021402 |
| 201972_at   | ATP6V1A  | -0.00674 | 0.003234 | 0.046213 |
| 201262_s_at | BGN      | 0.01284  | 0.003687 | 0.049934 |
| 219318_x_at | MED31    | -0.01822 | 0.00019  | 0.006892 |
| 210815_s_at | CALCRL   | 0.014664 | 0.000445 | 0.011785 |
| 209687_at   | CXCL12   | 0.017483 | 0.001186 | 0.023264 |



|             |           |           |          |          |
|-------------|-----------|-----------|----------|----------|
| 202797_at   | SACM1L    | -0.0081   | 0.002165 | 0.035124 |
| 218841_at   | ASB8      | -0.00831  | 0.002627 | 0.039812 |
| 202687_s_at | TNFSF10   | 0.011311  | 0.001841 | 0.031347 |
| 201108_s_at | THBS1     | 0.017779  | 2.03E-04 | 0.007121 |
| 218341_at   | PPCS      | -0.0075   | 0.000391 | 0.01093  |
| 218150_at   | ARL5A     | -0.01264  | 0.000767 | 0.01711  |
| 209555_s_at | CD36      | 0.011759  | 0.001889 | 0.031906 |
| 203007_x_at | LYPLA1    | -0.01139  | 7.57E-05 | 0.0037   |
| 205045_at   | AKAP10    | -0.00741  | 0.000814 | 0.017883 |
| 211468_s_at | RECQL5    | -0.01276  | 2.81E-05 | 0.001943 |
| 210262_at   | CRISP2    | -0.0119   | 0.00221  | 0.035548 |
| 219463_at   | C20orf103 | 0.014108  | 0.000462 | 0.012117 |
| 213541_s_at | ERG       | 1.45E-02  | 0.000393 | 0.010956 |
| 205420_at   | PEX7      | -0.0121   | 0.001457 | 0.026801 |
| 203758_at   | CTSO      | 0.008319  | 0.003629 | 0.049598 |
| 203853_s_at | GAB2      | 0.008386  | 0.002615 | 0.039733 |
| 38671_at    | PLXND1    | 0.011622  | 0.000397 | 0.011011 |
| 202638_s_at | ICAM1     | 0.013295  | 0.003347 | 0.047153 |
| 209075_s_at | ISCU      | -0.0071   | 0.001383 | 0.025817 |
| 215649_s_at | MVK       | -0.01125  | 0.000591 | 0.014336 |
| 219401_at   | XYLT2     | 0.008391  | 0.002621 | 0.039752 |
| 212804_s_at | GAPVD1    | -9.48E-03 | 0.00244  | 0.037954 |
| 208229_at   | FGFR2     | -0.01309  | 0.003619 | 0.049573 |
| 219350_s_at | DIABLO    | -0.00745  | 0.003259 | 0.046423 |
| 217606_at   |           | -0.00941  | 0.003445 | 0.048123 |
| 212758_s_at | ZEB1      | 0.011588  | 0.000674 | 0.015596 |
| 212149_at   | EFR3A     | -0.0083   | 0.003693 | 0.049934 |
| 211023_at   | PDHB      | -0.00662  | 0.002872 | 0.042474 |
| 214835_s_at | SUCLG2    | -0.01282  | 0.00226  | 0.036179 |
| 208116_s_at | MAN1A1    | -0.00992  | 0.001112 | 0.022266 |
| 205580_s_at | HRH1      | 0.010189  | 0.002864 | 0.042425 |
| 205816_at   | ITGB8     | 0.015846  | 0.0014   | 0.026029 |
| 210284_s_at | TAB2      | -0.00871  | 0.000494 | 0.012684 |
| 214857_at   |           | -0.00798  | 0.002452 | 0.03801  |
| 220083_x_at | UCHL5     | -7.73E-03 | 0.000998 | 0.020702 |
| 204628_s_at | ITGB3     | 0.016624  | 0.001565 | 0.027946 |
| 219034_at   | PARP16    | -0.0091   | 0.000432 | 0.011543 |
| 209274_s_at | ISCA1     | -0.00976  | 0.002592 | 0.039509 |
| 201006_at   | PRDX2     | -0.00777  | 2.64E-04 | 0.008463 |
| 201261_x_at | BGN       | 0.019566  | 0.000262 | 0.008427 |
| 219917_at   | ZCCHC4    | -0.01048  | 0.002578 | 0.039383 |
| 222056_s_at | FAHD2A    | -0.00893  | 0.000866 | 0.018684 |
| 210517_s_at | AKAP12    | 0.017875  | 0.001296 | 0.024734 |
| 209099_x_at | JAG1      | 0.012414  | 0.000956 | 0.020131 |
| 202734_at   | TRIP10    | 0.010745  | 0.00257  | 0.039315 |
| 207052_at   | HAVCR1    | 0.027262  | 0.000906 | 0.019285 |
| 206485_at   | CD5       | 0.006138  | 0.001839 | 0.031347 |
| 209927_s_at | C1orf77   | 0.008932  | 0.002324 | 0.036871 |
| 205849_s_at | UQCRB     | -0.00537  | 0.000313 | 0.009487 |

|             |          |           |          |          |
|-------------|----------|-----------|----------|----------|
| 215380_s_at | GGCT     | -0.00933  | 0.000407 | 0.011211 |
| 222217_s_at | SLC27A3  | 0.010847  | 0.002463 | 0.03808  |
| 204975_at   | EMP2     | 0.012058  | 0.002994 | 0.043767 |
| 214719_at   | SLC46A3  | -9.14E-03 | 0.000301 | 0.009212 |
| 221622_s_at | TMEM126B | -0.0087   | 0.001443 | 0.02658  |
| 213662_at   |          | 0.006564  | 0.002037 | 0.033594 |
| 202804_at   | ABCC1    | 0.011866  | 0.003345 | 0.047153 |
| 210096_at   | CYP4B1   | -0.0155   | 0.000675 | 0.015596 |
| 222324_at   |          | -0.01294  | 0.002105 | 0.034456 |
| 207537_at   | PFKFB1   | -0.01304  | 0.00108  | 0.021859 |
| 200925_at   | COX6A1   | -0.00813  | 5.45E-04 | 0.013568 |
| 202789_at   | PLCG1    | 0.005765  | 0.003272 | 0.046534 |
| 219181_at   | LIPG     | 0.016017  | 0.000418 | 0.011382 |
| 204626_s_at | ITGB3    | 0.025923  | 0.000854 | 0.018504 |
| 201965_s_at | SETX     | 0.007303  | 0.003446 | 0.048123 |
| 206896_s_at | GNG7     | -0.01119  | 0.00111  | 0.022246 |
| 216431_at   |          | 0.00839   | 0.002576 | 0.039383 |
| 203868_s_at | VCAM1    | 0.014512  | 0.000472 | 0.012317 |
| 202090_s_at | UQCR11   | -0.00965  | 0.003612 | 0.049573 |
| 200795_at   | SPARCL1  | 0.015763  | 6.46E-04 | 0.015176 |
| 218853_s_at | MOSPD1   | -0.01029  | 0.003161 | 0.045646 |
| 211752_s_at | NDUFS7   | -0.01067  | 0.002737 | 0.040928 |
| 201706_s_at | PEX19    | -0.01092  | 0.001902 | 0.031961 |
| 215836_s_at | PCDHGA1  | 0.009667  | 0.000415 | 0.011318 |
| 202669_s_at | EFNB2    | 0.013508  | 0.000335 | 0.009848 |
| 206331_at   | CALCRL   | 0.013406  | 0.003688 | 0.049934 |
| 203937_s_at | TAF1C    | -0.0078   | 0.002184 | 0.035349 |
| 55093_at    | CHPF2    | 0.011249  | 0.003701 | 0.049934 |
| 221489_s_at | SPRY4    | 0.013811  | 0.0021   | 0.034415 |
| 209066_x_at | UQCRB    | -0.00605  | 0.002341 | 0.036983 |
| 202555_s_at | MYLK     | 0.011084  | 0.002763 | 0.04125  |
| 201338_x_at | GTF3A    | -0.00671  | 0.00354  | 0.049048 |
| 218712_at   | C1orf109 | -0.00881  | 0.000705 | 0.016159 |
| 209101_at   | CTGF     | 1.43E-02  | 0.003571 | 0.049345 |
| 205717_x_at | PCDHGA1  | 0.008159  | 0.002073 | 0.034068 |
| 215494_at   |          | -0.00933  | 0.003144 | 0.045485 |
| 215821_x_at | PSG3     | -0.01054  | 0.003279 | 0.046534 |
| 213438_at   | NFASC    | 0.016223  | 0.003425 | 0.048014 |
| 210093_s_at | MAGOH    | -0.00702  | 0.001243 | 0.023996 |
