# Supplementary material for: Human Kidney Tubule-Specific Gene Expression Based Dissection of Chronic Kidney Disease Traits
Source: PubMed Central journal article supplement — eBioMedicine. 2017 Sep 17;24:267–76. doi: 10.1016/j.ebiom.2017.09.014 (PMC5652292; doi:10.1016/j.ebiom.2017.09.014), 2017-09-17
Supplement: mmc6.pdf [file mmc6.pdf]

## **Supplementary Figures**

### **Supplementary Figure 1. Validation of genes correlating with CKD traits**

(A) Correlation plots of the top 5 eGFR-correlated genes (LPA, PLG, XPNPEP2, ALB, UMOD) and the top 5 fibrosis-correlated genes (LPA, IGHG1, PLG, XPNPEP2, TRBC1) identified in the primary dataset drawn using the validation dataset. (B) The number of genes correlating with eGFR or fibrosis in the primary and validation dataset, in the unadjusted and adjusted model. The absolute probe number is presented on the left side, while the percentages on the right. (C) Pathway analysis using Gene Ontology of total CKD associated genes (left panel) and of genes with direct (middle panel) or inverse (right panel) correlation with CKD.

### **Supplementary Figure 2. Validation of known biomarkers correlation**

Expression levels of the following biomarkers (y-axis): FABP1, NGAL, KIM1, IGFBP1, IL18 and EGF and eGFR (x-axis) and interstitial fibrosis (x-axis) using the validation dataset. The  $R^2$  value was examined for linear correlation. \* p value<0.05.

### **Supplementary Figure 3. Principal component analysis plot**

Principal component analysis (PCA) plot of 95 kidney samples included in the primary dataset was the primary method used for outlier detection, among other methods.

**A** Top five eGFR-correlated genes

Relative gene expression

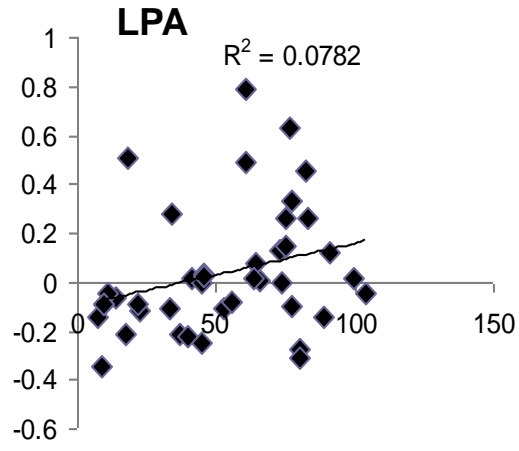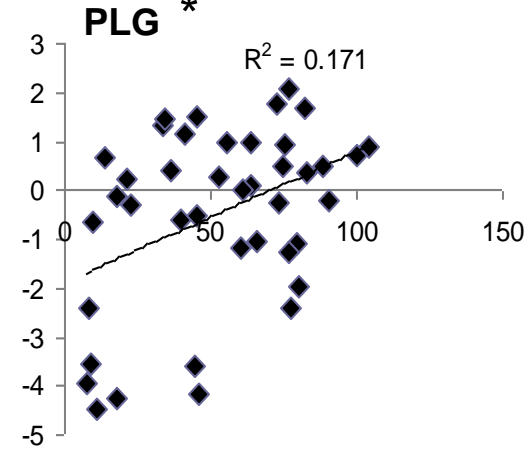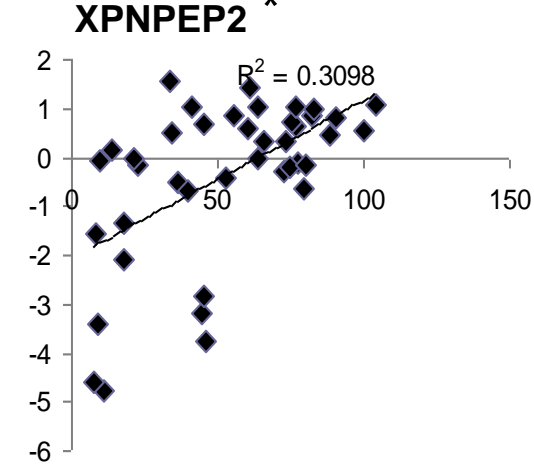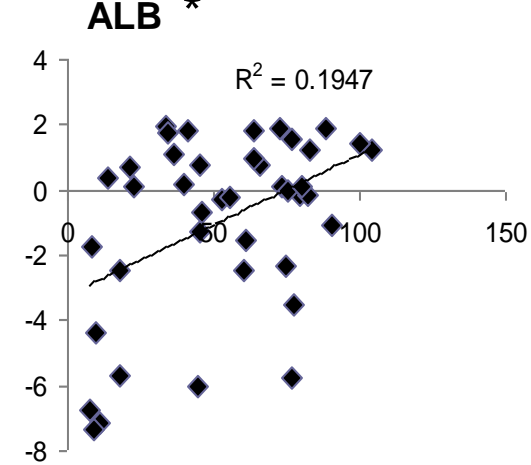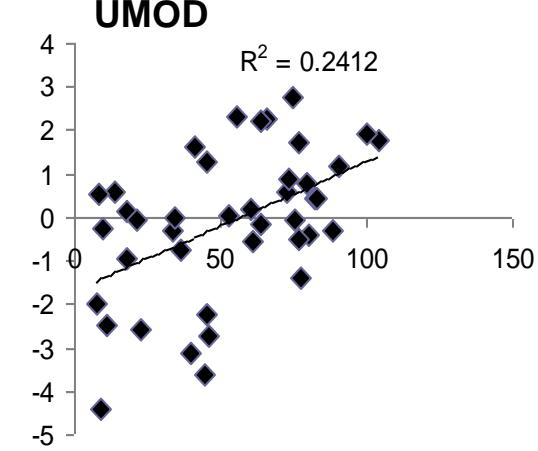Kidney function eGFR ml/min/1.73m<sup>2</sup>

## Top five fibrosis-correlated genes

Relative gene expression

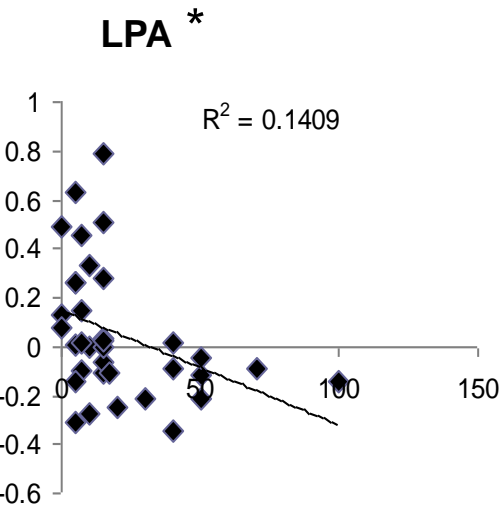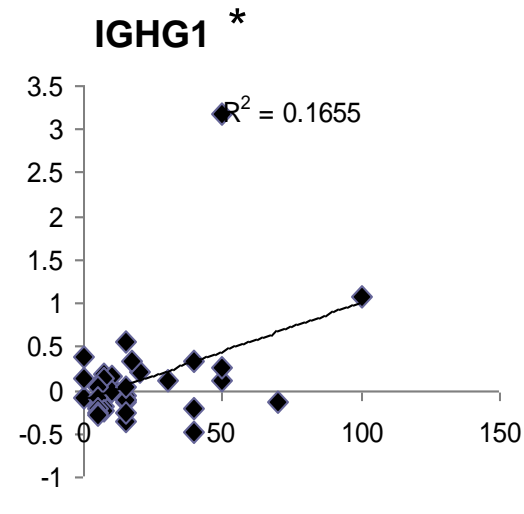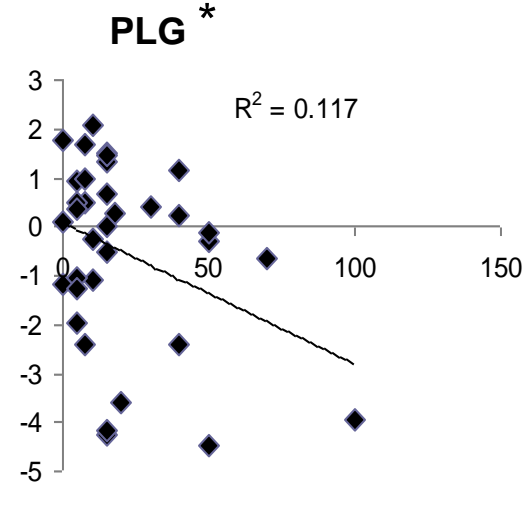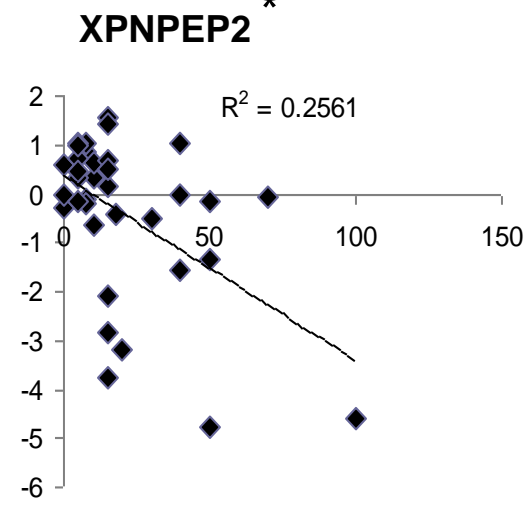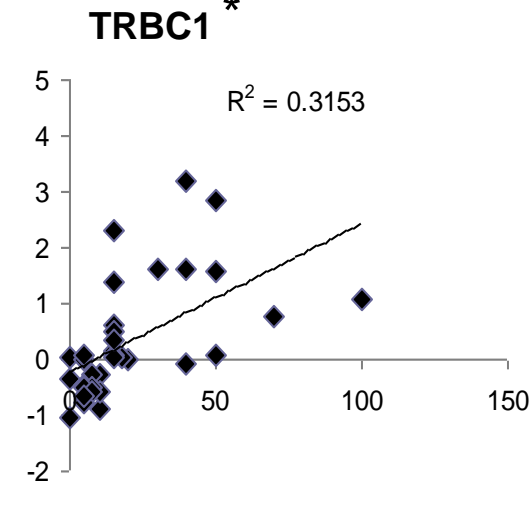

Tubulointerstitial fibrosis (%)

**B**

|                                        | Primary data | Validated |
|----------------------------------------|--------------|-----------|
| GE~Fibrosis                            | 5128         | 2101      |
| GE~GFR                                 | 3156         | 1714      |
| GE~Fibrosis+DM+HTN+age+gender+race     | 3189         | 1296      |
| GE~GFR+DM+HTN+age+gender+race          | 647          | 389       |
| GE~Fibrosis+GFR+DM+HTN+age+gender+race | 1654         | 126       |
| GE~GFR+Fibrosis+DM+HTN+age+gender+race | 0            | 0         |

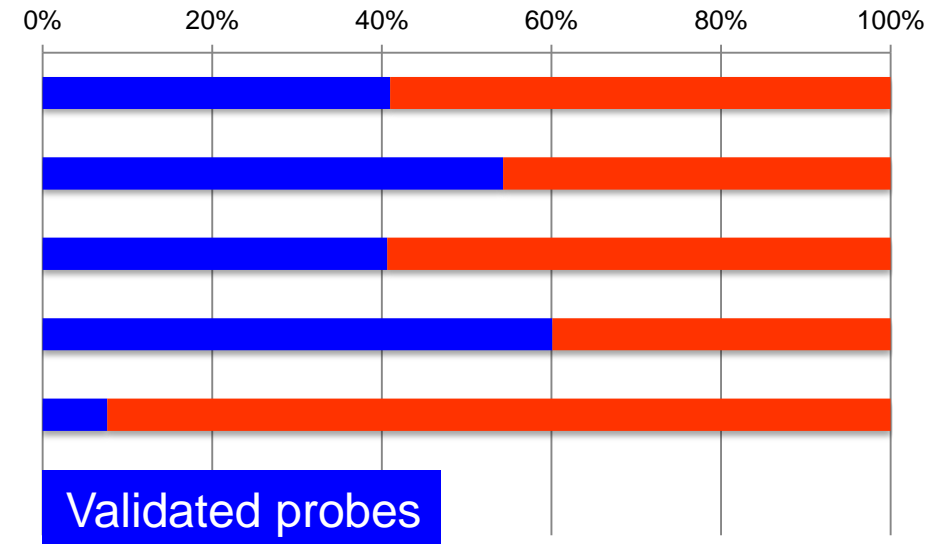**C**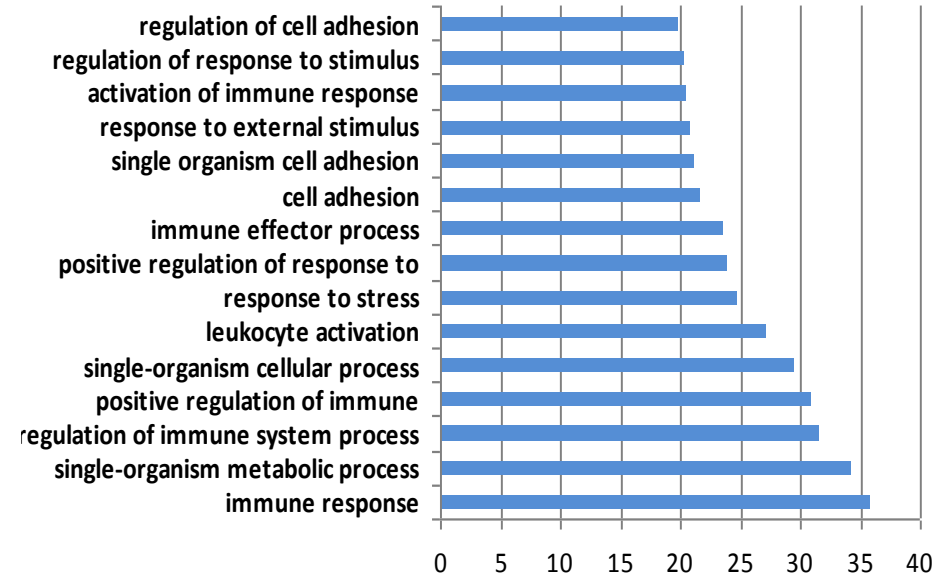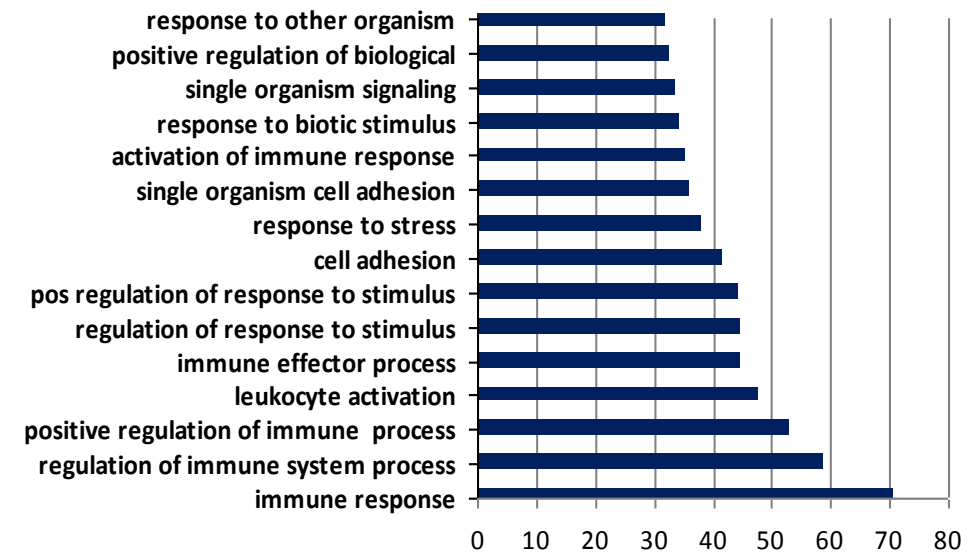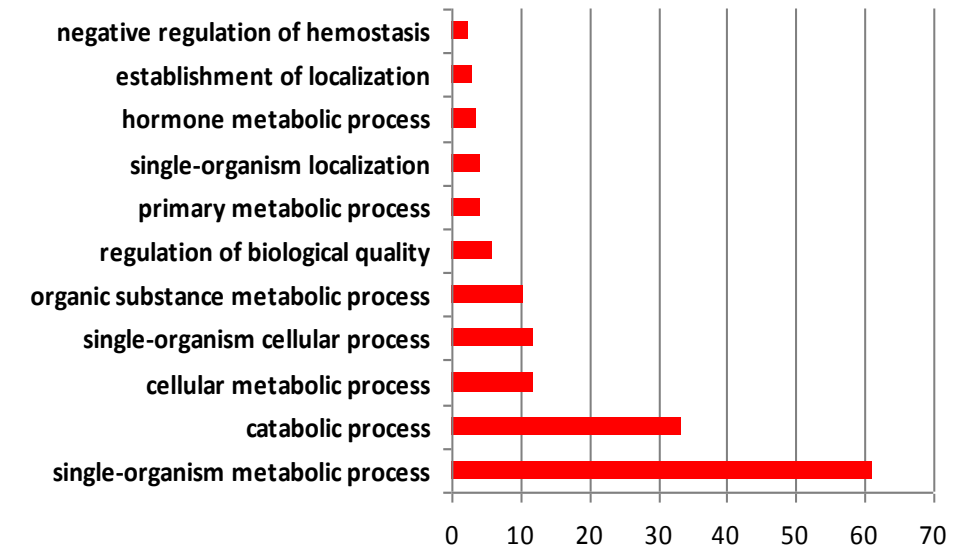

Supplementary Figure 2

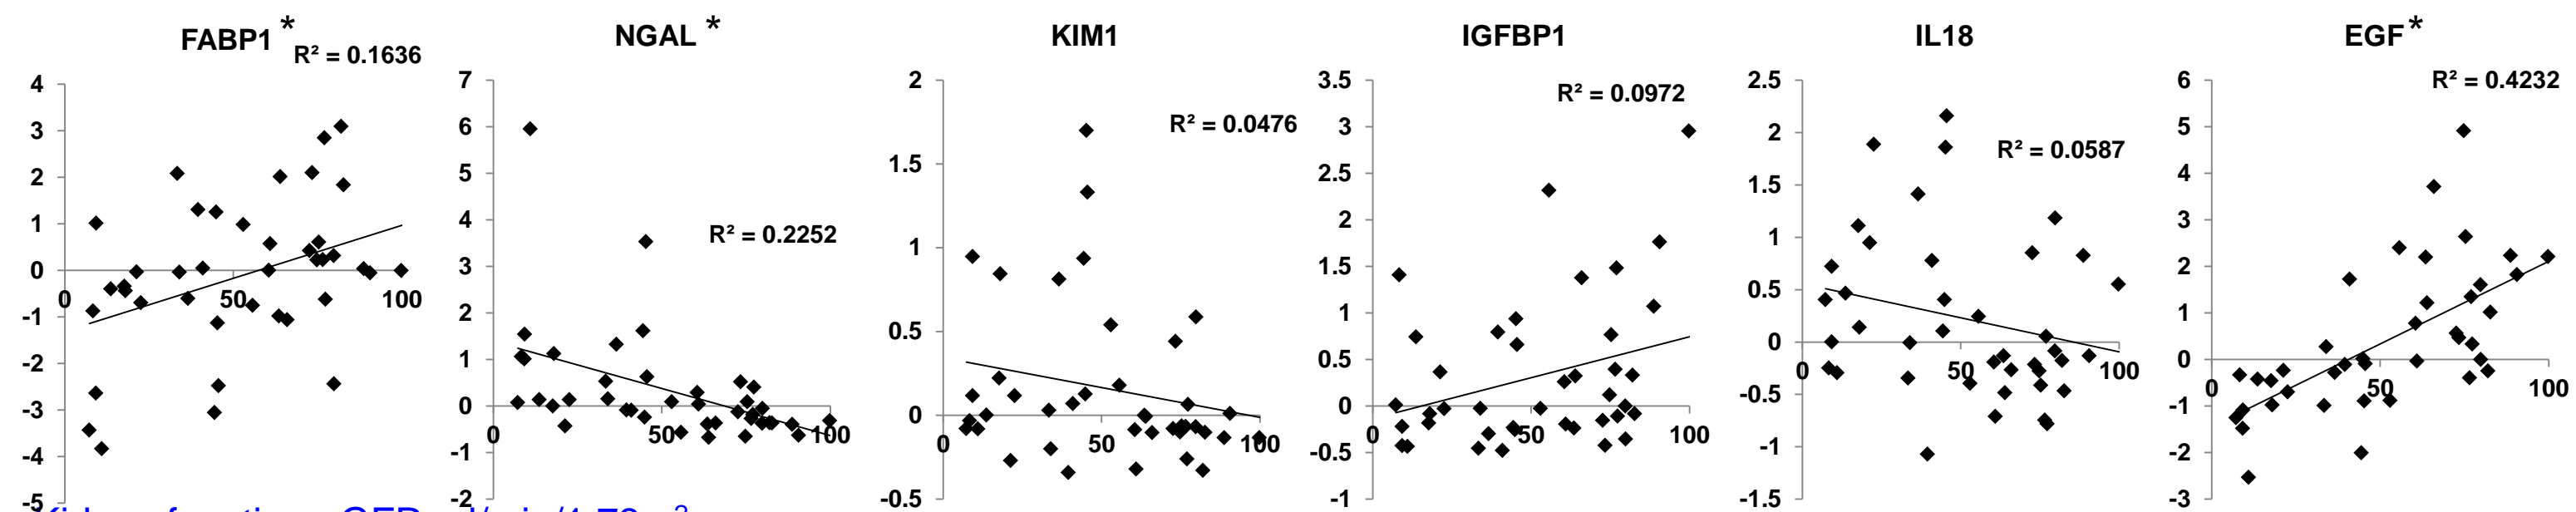

Kidney function eGFR ml/min/1.73m<sup>2</sup>

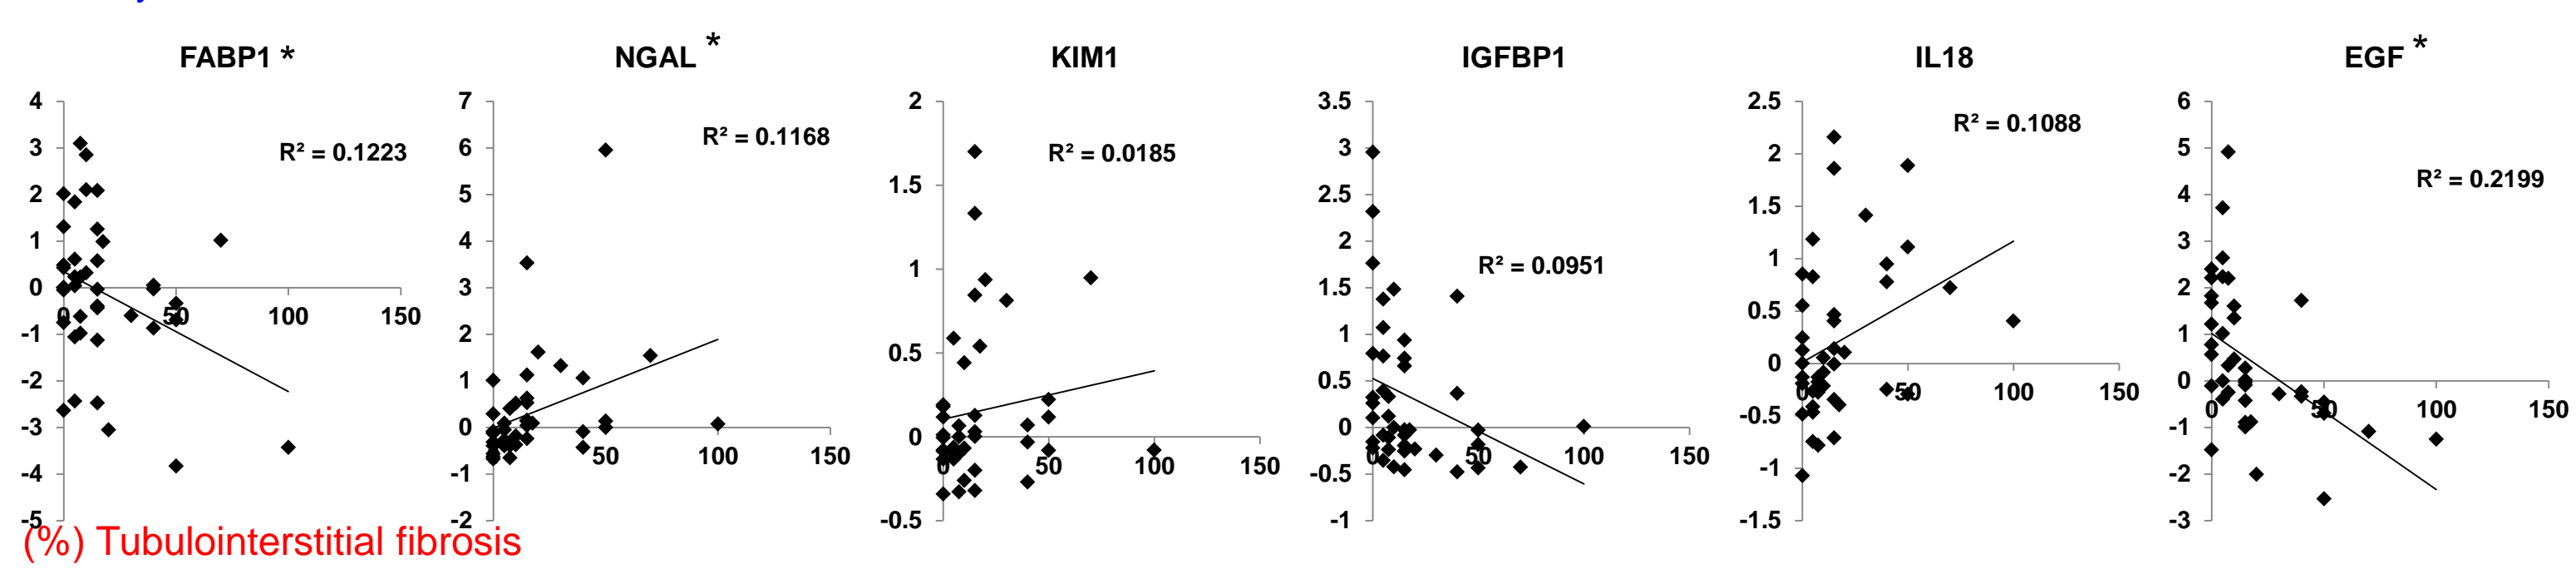

(%) Tubulointerstitial fibrosis

Supplementary Figure3

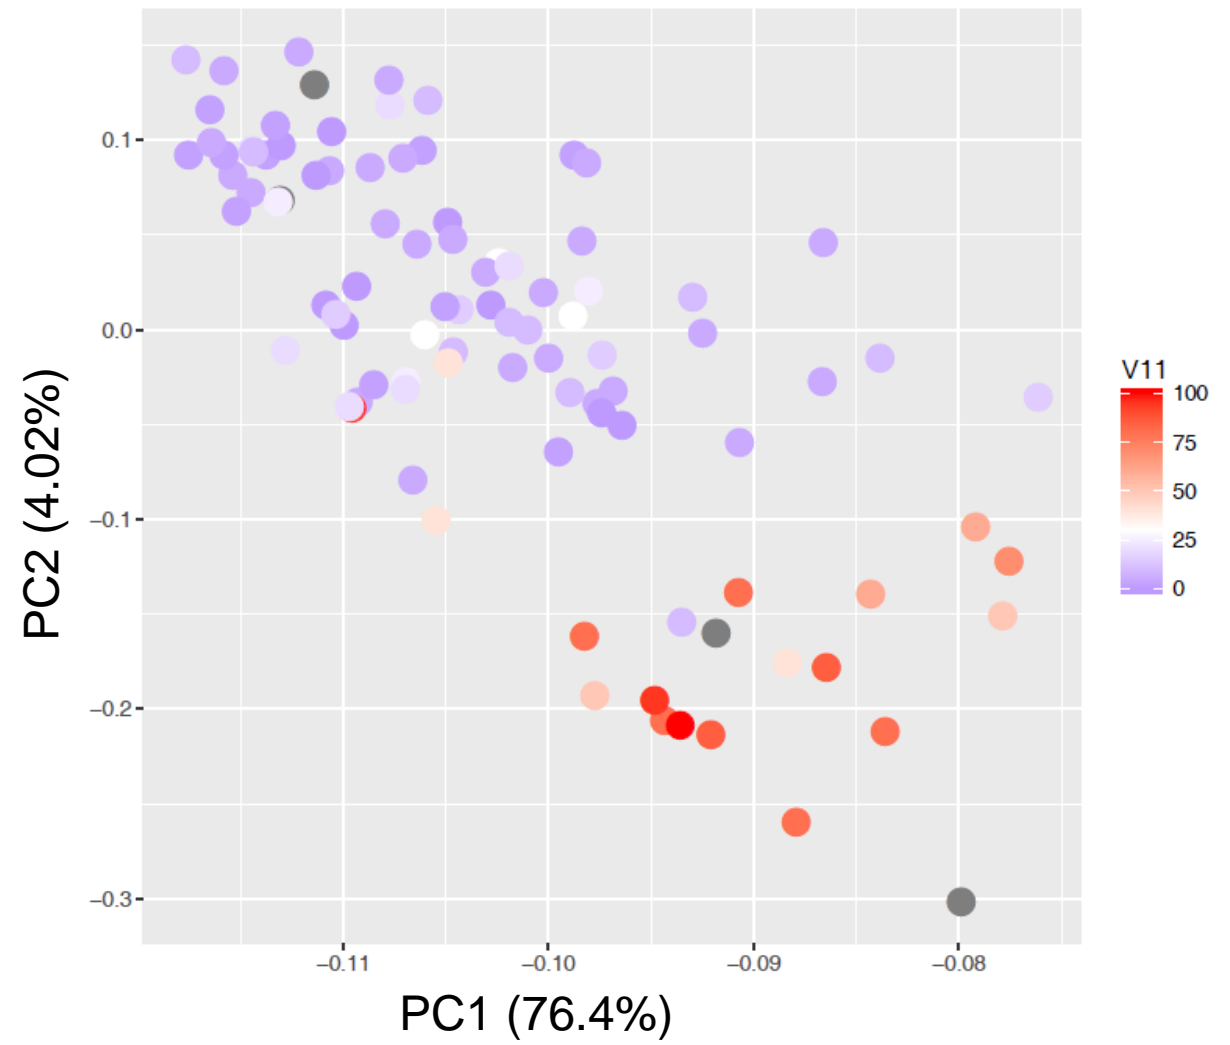

highly variable genes 5000
